# Supplementary material for: ZmPP2C26 Alternative Splicing Variants Negatively Regulate Drought Tolerance in Maize
Source: Front Plant Sci. 2022 Apr 8;13:851531. doi: 10.3389/fpls.2022.851531 (PMC9024303; doi:10.3389/fpls.2022.851531)
Supplement: Supplementary file 1 [file Table_1.xlsx]

## Sheet: SUPPLEMENTARY TABLE 1
SUPPLEMENTARY TABLE 1 The information of all primers used in the present study
Primers for amplification of ZmPP2C26
ZmPP2Ca-F	ATGTCTTGCACGGTGGCCA
ZmPP2Ca-R	CGAGCTTGAAAATTTCTGCAACT
	Primers for qRT-PCR
EF1a-F	TGGGCCTACTGGTCTTACTACTGA
EF1a-R	ACATACCCACGCTTCAGATCCT
PP2C26L-F	CTTTGGTACCGAGCGGGG
PP2C26L-R	AACTCCTCCCCTTCCTCCTC
PP2C26S-F	CCCGCCTCTACCGCGGCGGT
PP2C26S-R	ACATGCCGGGTCCTCCATTTC
PP2C26-F	GTGGCACTGTTTGGTGTGTT
PP2C26-R	CTCCGCCGTTTACCTTCGTC
MPK3F	AGCCGTTCTCGTTCGACTTC
MPK3R	ATCGGAAACTGGGGTTCAGC
MPK7F	TGGAGCTCATTGGAACACCG
MPK7R	TAGCATGACAGGGAAGTTGGC
Primers for plasmid construct of subcellular localization and co-localization
2300-ZmPP2C-F	ggtacccggggatcctctagaATGTCTTGCACGGTGGCCA
2300-ZmPP2C-R	cttgctcaccatggtactagtCGAGCTTGAAAATTTCTGCAACT
mCherry-ZmMPK3-F	gagagctcctcgagggatccATGAGCTCCGCCGGAGGC
mCherry-ZmMPK3-R	cccttgctcaccatggatccATATCGGAAACTGGGGTTCAGC
mCherry-ZmMPK7-F	gagagctcctcgagggatccATGGACGGCGGGGGGCAG
mCherry-ZmMPK7-R	cccttgctcaccatggatccCTGGTAATCTGGGTTGAATGCA
Primers for plasmid construct of over-expression rice
pCAMBIA1305-ZmPP2C26-F	acgggggactcttgaccatggATGTCTTGCACGGTGGCCA
pCAMBIA1305-ZmPP2C26-R	ttaccctcagatctaccatggCGAGCTTGAAAATTTCTGCAACT
Primers for plasmid construct of yeast two hybrid
AD-ZmPP2C26-F	gtaccagattacgctcatatgATGTCTTGCACGGTGGCCA
AD-ZmPP2C26-R	atgcccacccgggtggaattcTTACGAGCTTGAAAATTTCTGCA
Primers for plasmid construct of GST-Pull down
pET32a-ZmPP2C26-F	acgacgacgacaaggccatggATGTCTTGCACGGTGGCCA
pET32a-ZmPP2C26-R	ctcgagtgcggccgcaagcttCGAGCTTGAAAATTTCTGCA
pGEX6p-ZmMPK3-F	cccctgggatccccggaattcATGAGCTCCGCCGGAGGC
pGEX6p-ZmMPK3-R	gtcacgatgcggccgctcgagCTAATATCGGAAACTGGGGTTCA
pGEX6p-ZmMPK7-F	cccctgggatccccggaattcATGGACGGCGGGGGGCAG
pGEX6p-ZmMPK7-R	gtcacgatgcggccgctcgagCTACTGGTAATCTGGGTTGAATGC
Primers for plasmid construct of BiFC
pSPYNE-ZmPP2C26-F	tccatcgatagtactgtcgacATGTCTTGCACGGTGGCCA
pSPYNE-ZmPP2C26-R	atcgtatgggtacatcccgggCGAGCTTGAAAATTTCTGCAACT
pSPYCE-ZmMPK3-F	tccatcgatagtactgtcgacATGAGCTCCGCCGGAGGC
pSPYCE-ZmMPK3-R	caacttttgctccatcccgggATATCGGAAACTGGGGTTCAGC
pSPYCE-ZmMPK7-F	tccatcgatagtactgtcgacATGGACGGCGGGGGGCAG
pSPYCE-ZmMPK7-R	caacttttgctccatcccgggCTGGTAATCTGGGTTGAATGCA
Primers for plasmid construct of Phosphorylation assay
pCAMBIA1300-ZmMPK3-F	acgggggacgagctcggtaccATGAGCTCCGCCGGAGGC
pCAMBIA1300-ZmMPK3-R	tgggtacatggatccggtaccATATCGGAAACTGGGGTTCAGC
pCAMBIA1300-ZmMPK7-F	acgggggacgagctcggtaccATGGACGGCGGGGGGCAG
pCAMBIA1300-ZmMPK7-R	tgggtacatggatccggtaccCTGGTAATCTGGGTTGAATGCA
Primers for zmpp2c26 mutant identification by RT-PCR
Mu-zmpp2c26-F3	AGGAGTTGACGAAGGTAAACGGCGG
Mu-zmpp2c26-R3	GACTCGCCATGTTCCACGGTAATTC
ZmGAPDH-F	TTCGGCATTGTTGAGGGTTTGA
ZmGAPDH-R	GATACCCTTGAGTGGACCCTCGGAA
