# Supplementary material for: ZmPP2C26 Alternative Splicing Variants Negatively Regulate Drought Tolerance in Maize
Source: Front Plant Sci. 2022 Apr 8;13:851531. doi: 10.3389/fpls.2022.851531 (PMC9024303; doi:10.3389/fpls.2022.851531)
Supplement: Supplementary file 4 [file Data_Sheet_4.XLSX]

## Sheet: Phospho(STY)Sites
SUPPLEMENTARY TABLE 3-1 Phospho-sites within proteins phosphorylation level changed >1.5-fold (P<0.05)
Proteins	Positions within proteins	Leading proteins	Protein	Fasta headers	Localization prob	PEP	Delta score	Number of Phospho (STY)	Amino acid	Sequence window	Modification window	Peptide window coverage	Phospho (STY) Probabilities	Position in peptide	Charge	Mass error [ppm]	Reverse	Potential contaminant	MS/MS IDs	Best localization MS/MS ID	N-1	N-2	N-3	L25-1	L25-2	L25-3	L70-1	L70-2	L70-3
tr|Q6F3A0|Q6F3A0_ORYSJ	269	tr|Q6F3A0|Q6F3A0_ORYSJ	tr|Q6F3A0|Q6F3A0_ORYSJ	>tr|Q6F3A0|Q6F3A0_ORYSJ Os03g0788800 protein OS=Oryza sativa subsp. japonica OX=39947 GN=LOC_Os03g57500 PE=2 SV=1	0.78151	0.041161	12.896	1	S	SDLQSFSDTLRSRLQSASMKYKDSITKSTRG	X;X;X;X;X;X;X;X;X;X;X;X;X;X;X;Phospho (STY);X;X;X;X;X;X;X;X;X;X;X;X;X;X;X	XXXXXXXXXXXXXPPPPPPPXXXXXXXXXXX	LQS(0.782)AS(0.218)MK	3	2	-2.2293			10796	10796	14865	14375	14217	13353	11882	12908	15280	14176	15693
tr|Q5JJV6|Q5JJV6_ORYSJ	49	tr|Q5JJV6|Q5JJV6_ORYSJ	tr|Q5JJV6|Q5JJV6_ORYSJ	>tr|Q5JJV6|Q5JJV6_ORYSJ Os01g0965900 protein OS=Oryza sativa subsp. japonica OX=39947 GN=Os01g0965900 PE=2 SV=1	0.999933	0.00927837	21.979	1	S	TTTTAGGAMEEEKAASPVSRHIMPHLLNIYG	X;X;X;X;X;X;X;X;X;X;X;X;X;X;X;Phospho (STY);X;X;X;X;X;X;X;X;X;X;X;X;X;X;X	XXXXXXXXXXXXXPPPPPPPXXXXXXXXXXX	AAS(1)PVSR	3	2	-0.12039			310;311;312	311	32910	31377	30558	33195	34767	37007	34214	35283	36258
sp|A0A0P0X9Z7|CWZF7_ORYSJ	1352	sp|A0A0P0X9Z7|CWZF7_ORYSJ	sp|A0A0P0X9Z7|CWZF7_ORYSJ	>sp|A0A0P0X9Z7|CWZF7_ORYSJ Cysteine-tryptophan domain-containing zinc finger protein 7 OS=Oryza sativa subsp. japonica OX=39947 GN=CWZF7 PE=1 SV=2	0.765121	0.000119272	45.423	1	S	HGITKQAISNPADTSSPVRKDNNSTGYALKE	X;X;X;X;X;X;X;X;X;X;X;X;X;X;X;Phospho (STY);X;X;X;X;X;X;X;X;X;X;X;X;X;X;X	XXXXXPPPPPPPPPPPPPPPXXXXXXXXXXX	QAIS(0.001)NPADT(0.135)S(0.099)S(0.765)PVRK	11	3	-0.56097			12803;12804	12804	29239	33388	21951	30165	21968	26285	23100	26737	20132
sp|A0A0P0X9Z7|CWZF7_ORYSJ	1096	sp|A0A0P0X9Z7|CWZF7_ORYSJ	sp|A0A0P0X9Z7|CWZF7_ORYSJ	>sp|A0A0P0X9Z7|CWZF7_ORYSJ Cysteine-tryptophan domain-containing zinc finger protein 7 OS=Oryza sativa subsp. japonica OX=39947 GN=CWZF7 PE=1 SV=2	0.449473	0.000121893	54.459		S	QNFHVAKTSPIESVSSSPPRISNNDKVSHDK	X;X;X;X;X;X;X;X;X;X;X;X;X;X;X;Phospho (STY);X;X;X;X;X;X;X;X;X;X;X;X;X;X;X	XXXXXXXPPPPPPPPPPPPPXXXXXXXXXXX	TSPIES(0.005)VS(0.096)S(0.449)S(0.449)PPR	9	2	2.409				17422	0	0	0	0	0	0	0	0	0
sp|A0A0P0X9Z7|CWZF7_ORYSJ	1097	sp|A0A0P0X9Z7|CWZF7_ORYSJ	sp|A0A0P0X9Z7|CWZF7_ORYSJ	>sp|A0A0P0X9Z7|CWZF7_ORYSJ Cysteine-tryptophan domain-containing zinc finger protein 7 OS=Oryza sativa subsp. japonica OX=39947 GN=CWZF7 PE=1 SV=2	0.525632	1.86e-06	61.375	1	S	NFHVAKTSPIESVSSSPPRISNNDKVSHDKI	X;X;X;X;X;X;X;X;X;X;X;X;X;X;X;Phospho (STY);X;X;X;X;X;X;X;X;X;X;X;X;X;X;X	XXXXXXPPPPPPPPPPPPPXXXXXXXXXXXX	TSPIES(0.002)VS(0.068)S(0.404)S(0.526)PPR	10	2	3.415			17421	17421	3304.4	3622.4	3763.2	4337.5	4545.8	4234	3827.6	3599.3	3780.9
sp|A2CIR7|NPR5_ORYSJ	76	sp|A2CIR7|NPR5_ORYSJ	sp|A2CIR7|NPR5_ORYSJ	>sp|A2CIR7|NPR5_ORYSJ BTB/POZ domain and ankyrin repeat-containing protein NPR5 OS=Oryza sativa subsp. japonica OX=39947 GN=NPR5 PE=1 SV=1	0.991431	0.0027674	23.14	1	S	AAPPGALLLDHLSPRSPSGGASASSPRGAGG	X;X;X;X;X;X;X;X;X;X;X;X;X;X;X;Phospho (STY);X;X;X;X;X;X;X;X;X;X;X;X;X;X;X	XXXXXXXXXXXXXXXPPPPPPPPPPPPXXXX	S(0.991)PS(0.008)GGASASSPR	1	2	1.3766			15503;15505	15503	4404.4	4295.7	4528.8	4685.5	4677.1	5656.7	5439.7	5229.6	5039
sp|A2CIR7|NPR5_ORYSJ	85	sp|A2CIR7|NPR5_ORYSJ	sp|A2CIR7|NPR5_ORYSJ	>sp|A2CIR7|NPR5_ORYSJ BTB/POZ domain and ankyrin repeat-containing protein NPR5 OS=Oryza sativa subsp. japonica OX=39947 GN=NPR5 PE=1 SV=1	0.986781	5.92e-05	60.486	1	S	DHLSPRSPSGGASASSPRGAGGSAAAAAAAT	X;X;X;X;X;X;X;X;X;X;X;X;X;X;X;Phospho (STY);X;X;X;X;X;X;X;X;X;X;X;X;X;X;X	XXXXXXPPPPPPPPPPPPXXXXXXXXXXXXX	SPSGGAS(0.001)AS(0.012)S(0.987)PR	10	2	-0.641			15501;15502;15504	15501	15580	14759	15442	13782	13740	15133	16093	15390	16345
sp|A3A2W2|CSPLO_ORYSJ	8	sp|A3A2W2|CSPLO_ORYSJ	sp|A3A2W2|CSPLO_ORYSJ	>sp|A3A2W2|CSPLO_ORYSJ CASP-like protein 4A2 OS=Oryza sativa subsp. japonica OX=39947 GN=Os02g0134500 PE=2 SV=2	0.939961	0.00845852	46.466	2	S	________MALEAQPSPSPSPRRSPEAAAGG	X;X;X;X;X;X;X;X;X;X;X;X;X;X;X;Phospho (STY);X;X;X;Phospho (STY);X;X;X;X;X;X;X;X;X;X;X	XXXXXXXXXPPPPPPPPPPPPPXXXXXXXXX	ALEAQPS(0.94)PS(0.106)PS(0.954)PR	7	2	-1.482			1088	1088	2686.4	2771.2	3047.2	3384.5	3647.2	3362.6	3092.5	3086	3096.3
sp|A3A2W2|CSPLO_ORYSJ	10	sp|A3A2W2|CSPLO_ORYSJ	sp|A3A2W2|CSPLO_ORYSJ	>sp|A3A2W2|CSPLO_ORYSJ CASP-like protein 4A2 OS=Oryza sativa subsp. japonica OX=39947 GN=Os02g0134500 PE=2 SV=2	0.597137	0.000499855	42.241	2	S	______MALEAQPSPSPSPRRSPEAAAGGAG	X;X;X;X;X;X;X;X;X;X;X;X;X;X;X;Phospho (STY);X;Phospho (STY);X;X;X;X;X;X;X;X;X;X;X;X;X	XXXXXXXPPPPPPPPPPPPPXXXXXXXXXXX	ALEAQPS(0.429)PS(0.597)PS(0.974)PR	9	2	2.2851			1087	1087	2373.9	2399.4	2184.3	2769.3	2767.4	2681.7	2637.5	2381.4	2414.4
sp|A3A2W2|CSPLO_ORYSJ	12	sp|A3A2W2|CSPLO_ORYSJ	sp|A3A2W2|CSPLO_ORYSJ	>sp|A3A2W2|CSPLO_ORYSJ CASP-like protein 4A2 OS=Oryza sativa subsp. japonica OX=39947 GN=Os02g0134500 PE=2 SV=2	0.973584	0.000499855	46.466	2	S	____MALEAQPSPSPSPRRSPEAAAGGAGAP	X;X;X;X;X;X;X;X;X;X;X;Phospho (STY);X;Phospho (STY);X;Phospho (STY);X;X;X;X;X;X;X;X;X;X;X;X;X;X;X	XXXXXPPPPPPPPPPPPPXXXXXXXXXXXXX	ALEAQPS(0.429)PS(0.597)PS(0.974)PR	11	2	2.2851			1087;1088	1087	5060.3	5170.7	5231.5	6153.8	6414.6	6044.3	5730	5467.4	5510.7
sp|A3AB67|FH16_ORYSJ	473	sp|A3AB67|FH16_ORYSJ	sp|A3AB67|FH16_ORYSJ	>sp|A3AB67|FH16_ORYSJ Formin-like protein 16 OS=Oryza sativa subsp. japonica OX=39947 GN=FH16 PE=2 SV=1	0.5	9.53e-07	88.784	1	S	SKDASGGSTSAGLGRSNSPEQIFLLEPRKSH	X;X;X;X;X;X;X;X;X;X;X;X;X;X;X;Phospho (STY);X;X;X;X;X;X;X;X;X;X;X;X;X;X;X	XXXXXXXXXXXXXXXPPPPPPPPPPPPPXXX	S(0.5)NS(0.5)PEQIFLLEPR	1	2	-1.276			15365	15365	2769	2603.6	2901.7	2609.6	2771.9	2932.8	3164.6	3849.1	3430.2
sp|A3AB67|FH16_ORYSJ	475	sp|A3AB67|FH16_ORYSJ	sp|A3AB67|FH16_ORYSJ	>sp|A3AB67|FH16_ORYSJ Formin-like protein 16 OS=Oryza sativa subsp. japonica OX=39947 GN=FH16 PE=2 SV=1	0.995586	5.61e-08	122.01	1	S	DASGGSTSAGLGRSNSPEQIFLLEPRKSHNI	X;X;X;X;X;X;X;X;X;X;X;X;X;X;X;Phospho (STY);X;X;X;X;X;X;X;X;X;X;X;X;X;X;X	XXXXXXXXXXXXXPPPPPPPPPPPPPXXXXX	S(0.004)NS(0.996)PEQIFLLEPR	3	2	0.223			15365;15366;15367;15368;15369	15368	11537	11129	11088	11931	11390	12091	14351	14341	15310
sp|A3AGM4|H2B1_ORYSJ;sp|Q943L2|H2B11_ORYSJ;sp|Q6F362|H2B9_ORYSJ;sp|Q6ZBP3|H2B2_ORYSJ;tr|A0A0P0XHD8|A0A0P0XHD8_ORYSJ;tr|A0A0P0WN72|A0A0P0WN72_ORYSJ;tr|A0A0P0V310|A0A0P0V310_ORYSJ;tr|A0A0P0UYK9|A0A0P0UYK9_ORYSJ;sp|Q9LGH4|H2B6_ORYSJ;tr|Q0JQL7|Q0JQL7_ORYSJ;sp|Q9LGH8|H2B8_ORYSJ	140;127;140;138;200;94;119;205;141;29;141	sp|A3AGM4|H2B1_ORYSJ;sp|Q6F362|H2B9_ORYSJ;sp|Q6ZBP3|H2B2_ORYSJ;sp|Q9LGH4|H2B6_ORYSJ;sp|Q9LGH8|H2B8_ORYSJ	sp|Q9LGH8|H2B8_ORYSJ	>sp|A3AGM4|H2B1_ORYSJ Histone H2B.1 OS=Oryza sativa subsp. japonica OX=39947 GN=H2B1 PE=1 SV=1;>sp|Q943L2|H2B11_ORYSJ Histone H2B.11 OS=Oryza sativa subsp. japonica OX=39947 GN=H2B.11 PE=3 SV=1;>sp|Q6F362|H2B9_ORYSJ Histone H2B.9 OS=Oryza sativa subsp. jap	0.993385	0.0041242	71.735	1	S	AVRLVLPGELAKHAVSEGTKAVTKFTSS___;SVRLVLPGELAKHAVSEGTKAVTKFTSA___;SVRLVLPGELAKHAVSEGTKAVTKFTSN___;SVRLVLPGELAKHAVSEGTKAVTKFTSS___	X;X;X;X;X;X;X;X;X;X;X;X;X;X;X;Phospho (STY);X;X;X;X;X;X;X;X;X;X;X;X;X;X;X	XXXXXXXXXXXXPPPPPPPPXXXXXXXXXXX	HAVS(0.993)EGT(0.007)K	4	2	-0.16998			7767;7768	7768	21484	20588	20854	23298	22205	23591	24314	23320	24378
sp|A3C4S4|GME1_ORYSJ	356	sp|A3C4S4|GME1_ORYSJ	sp|A3C4S4|GME1_ORYSJ	>sp|A3C4S4|GME1_ORYSJ GDP-mannose 3,5-epimerase 1 OS=Oryza sativa subsp. japonica OX=39947 GN=GME-1 PE=1 SV=1	0.929615	6e-05	61.757	1	S	IEKEKTQGVDIAGYGSSKVVSTQAPVQLGSL	X;X;X;X;X;X;X;X;X;X;X;X;X;X;X;Phospho (STY);X;X;X;X;X;X;X;X;X;X;X;X;X;Phospho (STY);X	XXXXXPPPPPPPPPPPPPXXXXXXXXXXXXX	TQGVDIAGYGS(0.93)S(0.07)K	11	2	-1.2341			17318	17318	3520.6	3078	2873.8	2206.9	2335.7	2310.2	6503.6	7656.7	7524.3
sp|A3C4S4|GME1_ORYSJ	370	sp|A3C4S4|GME1_ORYSJ	sp|A3C4S4|GME1_ORYSJ	>sp|A3C4S4|GME1_ORYSJ GDP-mannose 3,5-epimerase 1 OS=Oryza sativa subsp. japonica OX=39947 GN=GME-1 PE=1 SV=1	0.999997	1.4e-07	72.456	1	S	GSSKVVSTQAPVQLGSLRAADGKE_______	X;Phospho (STY);X;X;X;X;X;X;X;X;X;X;X;X;X;Phospho (STY);X;X;X;X;X;X;X;X;X;X;X;X;X;X;X	XXXXPPPPPPPPPPPPPPXXXXXXXXXXXXX	VVSTQAPVQLGS(1)LR	12	3	0.42892			19347;19348;19349	19349	14715	16013	13905	14608	14485	14805	16250	17459	17172
sp|A3C6G9|GCSH_ORYSJ	126	sp|A3C6G9|GCSH_ORYSJ	sp|A3C6G9|GCSH_ORYSJ	>sp|A3C6G9|GCSH_ORYSJ Glycine cleavage system H protein, mitochondrial OS=Oryza sativa subsp. japonica OX=39947 GN=GDCSH PE=1 SV=1	0.447514	2.13e-08	60.467		S	VEVNDKLSETPGLINSSPYEDGWMIKVKPSS	X;X;X;X;X;X;X;X;X;X;X;X;X;X;X;Phospho (STY);X;X;X;X;X;X;X;X;X;X;X;X;X;Phospho (STY);X	XXXXXXPPPPPPPPPPPPPPPPPPPPXXXXX	LSETPGLINS(0.448)S(0.448)PY(0.104)EDGWMIK	10	3	-0.44913				10885	0	0	0	0	0	0	0	0	0
sp|A3C6G9|GCSH_ORYSJ	127	sp|A3C6G9|GCSH_ORYSJ	sp|A3C6G9|GCSH_ORYSJ	>sp|A3C6G9|GCSH_ORYSJ Glycine cleavage system H protein, mitochondrial OS=Oryza sativa subsp. japonica OX=39947 GN=GDCSH PE=1 SV=1	0.447514	2.13e-08	60.467		S	EVNDKLSETPGLINSSPYEDGWMIKVKPSSP	X;X;X;X;X;X;X;X;X;X;X;X;X;X;X;X;X;X;X;X;X;X;X;X;X;X;X;X;Phospho (STY);X;X	XXXXXXXXXXXXXXXXXXXXXXXXXXXXXXX	LSETPGLINS(0.448)S(0.448)PY(0.104)EDGWMIK	11	3	-0.44913				10885	0	0	0	0	0	0	0	0	0
sp|A3C6G9|GCSH_ORYSJ	140	sp|A3C6G9|GCSH_ORYSJ	sp|A3C6G9|GCSH_ORYSJ	>sp|A3C6G9|GCSH_ORYSJ Glycine cleavage system H protein, mitochondrial OS=Oryza sativa subsp. japonica OX=39947 GN=GDCSH PE=1 SV=1	0.443036	9.25e-06	49.463		S	NSSPYEDGWMIKVKPSSPSELDALLDPAKYT	X;Phospho (STY);X;X;X;X;X;X;X;Oxidation (M);X;X;X;X;X;Phospho (STY);X;X;X;X;X;X;X;X;X;X;X;X;X;X;X	XXXXXXXXXXXXPPPPPPPPPPPPPPPPPXX	VKPS(0.443)S(0.443)PS(0.114)ELDALLDPAK	4	5	0.56889				18531	0	0	0	0	0	0	0	0	0
sp|A3C6G9|GCSH_ORYSJ	141	sp|A3C6G9|GCSH_ORYSJ	sp|A3C6G9|GCSH_ORYSJ	>sp|A3C6G9|GCSH_ORYSJ Glycine cleavage system H protein, mitochondrial OS=Oryza sativa subsp. japonica OX=39947 GN=GDCSH PE=1 SV=1	0.443036	9.25e-06	49.463		S	SSPYEDGWMIKVKPSSPSELDALLDPAKYTK	Phospho (STY);X;X;X;X;X;X;X;Oxidation (M);X;X;X;X;X;X;X;X;X;X;X;X;X;X;X;X;X;X;X;X;X;X	XXXXXXXXXXXXXXXXXXXXXXXXXXXXXXX	VKPS(0.443)S(0.443)PS(0.114)ELDALLDPAK	5	5	0.56889				18531	0	0	0	0	0	0	0	0	0
sp|A3C6G9|GCSH_ORYSJ	143	sp|A3C6G9|GCSH_ORYSJ	sp|A3C6G9|GCSH_ORYSJ	>sp|A3C6G9|GCSH_ORYSJ Glycine cleavage system H protein, mitochondrial OS=Oryza sativa subsp. japonica OX=39947 GN=GDCSH PE=1 SV=1	0.815852	6.97e-19	150.27	1	S	PYEDGWMIKVKPSSPSELDALLDPAKYTKHC	X;X;X;X;X;X;Oxidation (M);X;X;X;X;X;X;X;X;Phospho (STY);X;X;X;X;X;X;X;X;X;X;X;X;X;X;X	XXXXXXXXXPPPPPPPPPPPPPPPPPXXXXX	VKPS(0.02)S(0.164)PS(0.816)ELDALLDPAK	7	3	-0.35725			18517;18518;18519;18520;18521;18522;18523;18524;18525;18526;18527;18528;18529;18530	18525	102670	98636	98657	116010	115810	118390	94996	96153	97009
sp|B1B534|EHD2_ORYSJ;tr|Q5SMY2|Q5SMY2_ORYSJ	95;64	sp|B1B534|EHD2_ORYSJ	sp|B1B534|EHD2_ORYSJ	>sp|B1B534|EHD2_ORYSJ Protein EARLY HEADING DATE 2 OS=Oryza sativa subsp. japonica OX=39947 GN=EHD2 PE=1 SV=1;>tr|Q5SMY2|Q5SMY2_ORYSJ Os01g0195000 protein OS=Oryza sativa subsp. japonica OX=39947 GN=Os01g0195000 PE=4 SV=1	1	4.97e-16	104.36	1	S	SLPGNPDPEAEVIALSPRALVATNRFVCEVC	X;X;X;X;X;X;X;X;X;X;X;X;X;X;X;Phospho (STY);X;X;X;X;X;X;X;X;X;X;X;X;X;X;X	PPPPPPPPPPPPPPPPPPXXXXXXXXXXXXX	SLPGNPDPEAEVIALS(1)PR	16	3	-0.27391			15185;15186;15187	15186	5881.1	5933.9	4739.2	5394.9	5173.3	5807	5313.7	6041.2	6020.9
sp|B2ZX90|FAS1_ORYSJ	285	sp|B2ZX90|FAS1_ORYSJ	sp|B2ZX90|FAS1_ORYSJ	>sp|B2ZX90|FAS1_ORYSJ Chromatin assembly factor 1 subunit FSM OS=Oryza sativa subsp. japonica OX=39947 GN=FSM PE=2 SV=1	0.99996	0.0102579	42.805	1	S	NLEGIKSLVERATQKSNIERGAKNTGSTAKE	X;X;X;X;X;X;X;X;X;X;X;X;X;X;X;Phospho (STY);X;X;X;X;X;X;X;X;X;X;X;X;X;X;X	XXXXXXXXXXXPPPPPPPPPXXXXXXXXXXX	ATQKS(1)NIER	5	2	0.099496			2062;2063	2062	15810	14661	13701	7385.5	7793.6	7516.3	10977	11169	11055
sp|B9FS74|KN14L_ORYSJ	287	sp|B9FS74|KN14L_ORYSJ	sp|B9FS74|KN14L_ORYSJ	>sp|B9FS74|KN14L_ORYSJ Kinesin-like protein KIN-14L OS=Oryza sativa subsp. japonica OX=39947 GN=KIN14L PE=2 SV=1	0.994127	2.45e-06	68.467	1	S	ELYNDQVRDLLSDSISPVPKVRMGVQESFVE	X;X;X;X;X;X;X;X;X;X;X;X;X;X;X;Phospho (STY);X;X;X;X;X;X;X;X;X;X;X;X;X;X;X	XXXXXXXXPPPPPPPPPPPPXXXXXXXXXXX	DLLSDS(0.006)IS(0.994)PVPK	8	3	-0.74545			3105;3106;3107	3106	8507.5	7844.9	6863.7	6298.1	5959.1	6166.9	6725.6	7113.5	7000.4
sp|B9FS74|KN14L_ORYSJ	1081	sp|B9FS74|KN14L_ORYSJ	sp|B9FS74|KN14L_ORYSJ	>sp|B9FS74|KN14L_ORYSJ Kinesin-like protein KIN-14L OS=Oryza sativa subsp. japonica OX=39947 GN=KIN14L PE=2 SV=1	0.999989	4.08e-19	119.11	1	S	QMRTDTVLLTKEEGGSPIRNPPTAAEDARLA	X;X;X;X;X;X;X;X;X;X;X;X;X;X;X;Phospho (STY);X;X;X;X;X;X;X;X;X;X;X;X;X;X;X	XXXPPPPPPPPPPPPPPPPPPPPPPPPPPXX	TDTVLLTKEEGGS(1)PIR	13	3	0.82962			3863;3864;3865;3866;3867;3868;3869;16666;16667;16668;16669	16666	54525	52050	52847	52907	52538	54768	54522	55710	56829
sp|B9FS74|KN14L_ORYSJ	684	sp|B9FS74|KN14L_ORYSJ	sp|B9FS74|KN14L_ORYSJ	>sp|B9FS74|KN14L_ORYSJ Kinesin-like protein KIN-14L OS=Oryza sativa subsp. japonica OX=39947 GN=KIN14L PE=2 SV=1	0.353777	1.71e-08	58.599		S	PSNKQTNAQGRDIGRSDSTKSQSSDVFPLPV	X;X;X;X;X;X;X;X;X;X;X;X;X;X;X;Phospho (STY);X;X;X;X;X;X;X;X;X;X;X;X;X;X;X	XXXXXXXXXXXXXXXPPPPPPPPPPPPPPPP	S(0.354)DS(0.31)T(0.31)KS(0.026)QS(0.001)SDVFPLPVSQDK	1	5	-0.73421				14368	0	0	0	0	0	0	0	0	0
sp|B9FS74|KN14L_ORYSJ	686	sp|B9FS74|KN14L_ORYSJ	sp|B9FS74|KN14L_ORYSJ	>sp|B9FS74|KN14L_ORYSJ Kinesin-like protein KIN-14L OS=Oryza sativa subsp. japonica OX=39947 GN=KIN14L PE=2 SV=1	0.75821	9.07e-27	178.58	1;2	S	NKQTNAQGRDIGRSDSTKSQSSDVFPLPVSQ	X;X;X;X;X;X;X;X;X;X;X;X;X;X;X;Phospho (STY);Phospho (STY);X;Phospho (STY);X;X;X;X;X;X;X;X;X;X;X;X	XXXXXXXXXXXXXPPPPPPPPPPPPPPPPPP	S(0.141)DS(0.758)T(0.294)KS(0.8)QS(0.006)SDVFPLPVSQDK	3	4	-0.1761			14362;14363;14365;14367;14372;14373;14374;14375;14376;14377	14377	60443	59323	55515	42196	43855	43859	67357	62705	68913
sp|B9FS74|KN14L_ORYSJ	689	sp|B9FS74|KN14L_ORYSJ	sp|B9FS74|KN14L_ORYSJ	>sp|B9FS74|KN14L_ORYSJ Kinesin-like protein KIN-14L OS=Oryza sativa subsp. japonica OX=39947 GN=KIN14L PE=2 SV=1	0.988015	1.51e-26	163.51	2	S	TNAQGRDIGRSDSTKSQSSDVFPLPVSQDKA	X;X;X;X;X;X;X;X;X;X;X;X;Phospho (STY);X;X;Phospho (STY);X;X;X;X;X;X;X;X;X;X;X;X;X;X;X	XXXXXXXXXXPPPPPPPPPPPPPPPPPPPPX	S(0.098)DS(0.455)T(0.456)KS(0.988)QS(0.002)SDVFPLPVSQDK	6	4	-0.017876			14370;14371;14372;14373;14374;14376;14377	14371	19232	18283	18154	16553	15945	16438	20902	20757	21160
sp|B9FS74|KN14L_ORYSJ	663	sp|B9FS74|KN14L_ORYSJ	sp|B9FS74|KN14L_ORYSJ	>sp|B9FS74|KN14L_ORYSJ Kinesin-like protein KIN-14L OS=Oryza sativa subsp. japonica OX=39947 GN=KIN14L PE=2 SV=1	0.947159	1.56e-05	64.791	2	S	EKLFDRLTEKSGLGSSPQAPSPSNKQTNAQG	X;X;X;X;X;X;X;X;X;X;X;X;X;X;X;Phospho (STY);X;X;X;X;Phospho (STY);X;X;X;X;X;X;X;X;X;X	XXXXXXXXXXPPPPPPPPPPPPPPPXXXXXX	S(0.001)GLGS(0.052)S(0.947)PQAPS(0.53)PS(0.471)NK	6	2	0.27129			14672;14673	14673	4990.8	5345.8	4634.7	5005.7	4298.3	4303	4973.4	4857.9	4554.8
sp|B9FS74|KN14L_ORYSJ	668	sp|B9FS74|KN14L_ORYSJ	sp|B9FS74|KN14L_ORYSJ	>sp|B9FS74|KN14L_ORYSJ Kinesin-like protein KIN-14L OS=Oryza sativa subsp. japonica OX=39947 GN=KIN14L PE=2 SV=1	0.961392	1.47e-08	86.015	1;2	S	RLTEKSGLGSSPQAPSPSNKQTNAQGRDIGR	X;X;X;X;X;X;X;X;X;X;Phospho (STY);X;X;X;X;Phospho (STY);X;X;X;X;X;X;X;X;X;X;X;X;X;X;X	XXXXXPPPPPPPPPPPPPPPXXXXXXXXXXX	SGLGSS(0.001)PQAPS(0.961)PS(0.037)NK	11	3	3.3283			14667;14668;14669;14670;14671;14672;14673	14668	44334	43792	42549	41712	40756	43359	41181	39932	40735
sp|B9FS74|KN14L_ORYSJ	611	sp|B9FS74|KN14L_ORYSJ	sp|B9FS74|KN14L_ORYSJ	>sp|B9FS74|KN14L_ORYSJ Kinesin-like protein KIN-14L OS=Oryza sativa subsp. japonica OX=39947 GN=KIN14L PE=2 SV=1	0.428618	1.69e-11	94.376		S	SDARSTIGSESASVISTPKMMESTADSSSVT	X;X;X;X;X;X;X;X;X;X;X;X;X;X;X;Phospho (STY);X;X;X;X;X;X;X;X;X;X;X;X;X;X;X	XXXXPPPPPPPPPPPPPPPXXXXXXXXXXXX	STIGSES(0.002)AS(0.141)VIS(0.429)T(0.429)PK	12	3	0.95514				16048	0	0	0	0	0	0	0	0	0
sp|B9FXV5|IF4G_ORYSJ;tr|A0A0P0X7E2|A0A0P0X7E2_ORYSJ	902;902	sp|B9FXV5|IF4G_ORYSJ	sp|B9FXV5|IF4G_ORYSJ	>sp|B9FXV5|IF4G_ORYSJ Eukaryotic translation initiation factor 4G OS=Oryza sativa subsp. japonica OX=39947 GN=Os07g0555200 PE=2 SV=2;>tr|A0A0P0X7E2|A0A0P0X7E2_ORYSJ Os07g0555200 protein (Fragment) OS=Oryza sativa subsp. japonica OX=39947 GN=Os07g0555200 PE	0.999391	2.21e-12	88.252	1	S	KDQSSSAPAASARPVSREKPSVEITRTKFTA	X;X;X;X;X;X;X;X;X;X;X;X;X;X;X;Phospho (STY);X;X;X;X;X;X;X;X;X;X;X;X;X;X;X	XPPPPPPPPPPPPPPPPXXXXXXXXXXXXXX	DQSSSAPAAS(0.001)ARPVS(0.999)R	15	2	0.60776			3312;3313;3314;3315	3314	14803	13613	14240	16390	16810	17347	16149	15145	15223
sp|B9FXV5|IF4G_ORYSJ;tr|A0A0P0X7E2|A0A0P0X7E2_ORYSJ	692;692	sp|B9FXV5|IF4G_ORYSJ	sp|B9FXV5|IF4G_ORYSJ	>sp|B9FXV5|IF4G_ORYSJ Eukaryotic translation initiation factor 4G OS=Oryza sativa subsp. japonica OX=39947 GN=Os07g0555200 PE=2 SV=2;>tr|A0A0P0X7E2|A0A0P0X7E2_ORYSJ Os07g0555200 protein (Fragment) OS=Oryza sativa subsp. japonica OX=39947 GN=Os07g0555200 PE	0.97931	5.86e-11	75.664	1	S	KGVNKESEQTNAASASPTEMLKAADASSIDR	X;X;X;X;X;X;X;X;X;X;X;X;X;X;X;Phospho (STY);X;X;X;X;X;X;X;X;X;X;X;X;X;X;X	XXXXXPPPPPPPPPPPPPPPPPXXXXXXXXX	ESEQTNAAS(0.01)AS(0.979)PT(0.01)EMLK	11	3	0.29062			4857;4858	4858	8500.3	7198.8	7131.7	7858.2	7012.2	7720.1	8388.1	7993.8	8544.3
sp|B9FXV5|IF4G_ORYSJ;tr|A0A0P0X756|A0A0P0X756_ORYSJ;tr|A0A0P0X7K8|A0A0P0X7K8_ORYSJ	1589;612;363	sp|B9FXV5|IF4G_ORYSJ	sp|B9FXV5|IF4G_ORYSJ	>sp|B9FXV5|IF4G_ORYSJ Eukaryotic translation initiation factor 4G OS=Oryza sativa subsp. japonica OX=39947 GN=Os07g0555200 PE=2 SV=2;>tr|A0A0P0X756|A0A0P0X756_ORYSJ Os07g0555200 protein (Fragment) OS=Oryza sativa subsp. japonica OX=39947 GN=Os07g0555200 PE	1	1.01e-26	168.09	1	S	IAPNTQFAGPSNRPASQEGRSGNKLYSEDDL	X;X;X;X;X;X;X;X;X;X;X;X;X;X;X;Phospho (STY);X;X;X;X;X;X;X;X;X;X;X;X;X;X;X	PPPPPPPPPPPPPPPPPPPPXXXXXXXXXXX	IAPNTQFAGPSNRPAS(1)QEGR	16	2	0.25455			8026;8027;8028;8029;8030;8031	8026	26111	23813	23994	32052	30101	32468	27007	25920	25333
sp|B9FXV5|IF4G_ORYSJ;tr|A0A0P0X7E2|A0A0P0X7E2_ORYSJ;tr|A0A0P0X756|A0A0P0X756_ORYSJ	1142;1142;165	sp|B9FXV5|IF4G_ORYSJ	sp|B9FXV5|IF4G_ORYSJ	>sp|B9FXV5|IF4G_ORYSJ Eukaryotic translation initiation factor 4G OS=Oryza sativa subsp. japonica OX=39947 GN=Os07g0555200 PE=2 SV=2;>tr|A0A0P0X7E2|A0A0P0X7E2_ORYSJ Os07g0555200 protein (Fragment) OS=Oryza sativa subsp. japonica OX=39947 GN=Os07g0555200 PE	0.999193	1.13e-05	114.83	1	S	LINVGPVAPQMSRSGSDADRWQQKGIFPSPV	X;X;X;X;X;X;X;X;X;X;X;X;X;X;X;Phospho (STY);X;X;X;X;X;X;X;X;X;X;X;X;X;X;X	XXXXXXXXXXXXXPPPPPPPPPPPXXXXXXX	S(0.001)GS(0.999)DADRWQQK	3	2	-0.68919			14707;14708;14709;14710;14711;14712	14710	65157	63063	60261	56160	55902	56362	96370	97140	99423
sp|B9FXV5|IF4G_ORYSJ;tr|A0A0P0X7E2|A0A0P0X7E2_ORYSJ	815;815	sp|B9FXV5|IF4G_ORYSJ	sp|B9FXV5|IF4G_ORYSJ	>sp|B9FXV5|IF4G_ORYSJ Eukaryotic translation initiation factor 4G OS=Oryza sativa subsp. japonica OX=39947 GN=Os07g0555200 PE=2 SV=2;>tr|A0A0P0X7E2|A0A0P0X7E2_ORYSJ Os07g0555200 protein (Fragment) OS=Oryza sativa subsp. japonica OX=39947 GN=Os07g0555200 PE	1	0.000626819	108.47	1	S	SSVSDENVIMDRSHQSAEKMSDLVDDTVASV	X;X;X;X;X;X;X;X;X;X;X;X;X;X;X;Phospho (STY);X;X;X;X;X;X;X;X;X;X;X;X;X;X;X	XXXXXXXXXXXXPPPPPPPXXXXXXXXXXXX	SHQS(1)AEK	4	3	0.98461			14890;14891;14892;14893;14894;14895	14892	24772	22742	21840	23376	22461	25109	19498	19006	19008
sp|B9FXV5|IF4G_ORYSJ;tr|A0A0P0X7E2|A0A0P0X7E2_ORYSJ	630;630	sp|B9FXV5|IF4G_ORYSJ	sp|B9FXV5|IF4G_ORYSJ	>sp|B9FXV5|IF4G_ORYSJ Eukaryotic translation initiation factor 4G OS=Oryza sativa subsp. japonica OX=39947 GN=Os07g0555200 PE=2 SV=2;>tr|A0A0P0X7E2|A0A0P0X7E2_ORYSJ Os07g0555200 protein (Fragment) OS=Oryza sativa subsp. japonica OX=39947 GN=Os07g0555200 PE	0.928554	0.00058274	70.532	1	S	PGDDGKSKESIQRTGSFKDSNKNATKDTRNL	X;X;X;X;X;X;X;X;X;X;X;X;X;X;X;Phospho (STY);X;X;X;X;X;X;X;X;X;X;X;X;X;X;X	XXXXXXXXXXXXXPPPPPPPPPXXXXXXXXX	T(0.008)GS(0.929)FKDS(0.064)NK	3	3	-0.29563			16839;16840;16841;16842;16844;16845;16846;16847	16845	142690	138140	138750	150220	141460	149370	151830	149830	146880
sp|B9FXV5|IF4G_ORYSJ;tr|A0A0P0X7E2|A0A0P0X7E2_ORYSJ	634;634	sp|B9FXV5|IF4G_ORYSJ	sp|B9FXV5|IF4G_ORYSJ	>sp|B9FXV5|IF4G_ORYSJ Eukaryotic translation initiation factor 4G OS=Oryza sativa subsp. japonica OX=39947 GN=Os07g0555200 PE=2 SV=2;>tr|A0A0P0X7E2|A0A0P0X7E2_ORYSJ Os07g0555200 protein (Fragment) OS=Oryza sativa subsp. japonica OX=39947 GN=Os07g0555200 PE	0.55007	0.00137712	64.439	1	S	GKSKESIQRTGSFKDSNKNATKDTRNLSQEP	X;X;X;X;X;X;X;X;X;X;X;X;X;X;X;Phospho (STY);X;X;X;X;X;X;X;X;X;X;X;X;X;X;X	XXXXXXXXXPPPPPPPPPXXXXXXXXXXXXX	T(0.004)GS(0.446)FKDS(0.55)NK	7	2	-0.29336			16843	16843	23432	19911	21994	22184	21890	21548	24445	22299	21406
sp|B9FXV5|IF4G_ORYSJ;tr|A0A0P0X7E2|A0A0P0X7E2_ORYSJ	189;189	sp|B9FXV5|IF4G_ORYSJ	sp|B9FXV5|IF4G_ORYSJ	>sp|B9FXV5|IF4G_ORYSJ Eukaryotic translation initiation factor 4G OS=Oryza sativa subsp. japonica OX=39947 GN=Os07g0555200 PE=2 SV=2;>tr|A0A0P0X7E2|A0A0P0X7E2_ORYSJ Os07g0555200 protein (Fragment) OS=Oryza sativa subsp. japonica OX=39947 GN=Os07g0555200 PE	0.997189	1.55e-06	86.706	1	S	GGTGGSTMQFPARTSSAPPNLDEQKRMQALP	X;X;X;X;X;X;X;X;X;X;X;X;X;X;X;Phospho (STY);X;X;X;X;X;X;X;X;X;X;X;X;X;X;X	XXXXXXXXXXXXXPPPPPPPPPPPPPXXXXX	T(0.001)S(0.002)S(0.997)APPNLDEQK	3	2	-0.0020754			17433;17435	17433	13891	12777	13758	18333	19373	19038	13614	14841	14448
sp|B9G2A8|BIG_ORYSJ	1378	sp|B9G2A8|BIG_ORYSJ	sp|B9G2A8|BIG_ORYSJ	>sp|B9G2A8|BIG_ORYSJ Auxin transport protein BIG OS=Oryza sativa subsp. japonica OX=39947 GN=Os09g0247700 PE=2 SV=1	0.914848	0.006502	25.071	1	S	FGSGSLIPKQLKNSDSLVLRTNQESNSTVDC	X;X;X;X;X;X;X;X;X;X;X;X;X;X;X;Phospho (STY);X;X;X;X;X;X;X;X;X;X;X;X;X;X;X	XXXXXXXXXXXXPPPPPPPPXXXXXXXXXXX	NS(0.085)DS(0.915)LVLR	4	2	0.39494			12472;12473	12473	18259	18080	16448	16950	16124	17639	20738	20811	20627
sp|C7J8E5|RTOR1_ORYSJ;sp|Q0IQN5|RTOR2_ORYSJ	789;931	sp|C7J8E5|RTOR1_ORYSJ	sp|C7J8E5|RTOR1_ORYSJ	>sp|C7J8E5|RTOR1_ORYSJ Regulatory-associated protein of TOR 1 OS=Oryza sativa subsp. japonica OX=39947 GN=RAPTOR1 PE=2 SV=2;>sp|Q0IQN5|RTOR2_ORYSJ Regulatory-associated protein of TOR 2 OS=Oryza sativa subsp. japonica OX=39947 GN=RAPTOR2 PE=1 SV=2	0.995991	5.48e-07	60.797	1	S	MNSGNFSMAFRTPPVSPPQHDYLTGLRRVCS	X;X;X;X;X;X;X;X;X;X;X;X;X;X;X;Phospho (STY);X;X;X;X;X;X;X;X;X;X;X;X;X;X;X	XXXXXXXXXXXPPPPPPPPPPPPPPPPXXXX	T(0.004)PPVS(0.996)PPQHDYLTGLR	5	3	-1.6765			17267;17268	17267	13912	14205	12783	14478	13045	14774	14123	16341	15159
tr|A0A0P0W7V7|A0A0P0W7V7_ORYSJ;sp|Q7XNX6|SUS7_ORYSJ;sp|H6TFZ4|SUS5_ORYSJ	12;12;12	tr|A0A0P0W7V7|A0A0P0W7V7_ORYSJ	tr|A0A0P0W7V7|A0A0P0W7V7_ORYSJ	>tr|A0A0P0W7V7|A0A0P0W7V7_ORYSJ Sucrose synthase OS=Oryza sativa subsp. japonica OX=39947 GN=Os04g0249500 PE=3 SV=1;>sp|Q7XNX6|SUS7_ORYSJ Sucrose synthase 7 OS=Oryza sativa subsp. japonica OX=39947 GN=SUS7 PE=2 SV=2;>sp|H6TFZ4|SUS5_ORYSJ Sucrose synthase 5	0.999994	3.52e-36	139.83	1	S	____MASKLSFKRMDSIAETMPDALRQSRYQ	X;X;X;X;X;X;X;X;X;X;X;X;X;X;X;Phospho (STY);X;X;X;X;X;X;X;X;X;X;X;X;X;X;X	XXXXXXXXXXXXPPPPPPPPPPPPPPXXXXX	RMDS(1)IAETMPDALR	4	2	0.86169			11490;11491;11493;13636;13637	13636	12272	13366	12018	11053	11190	12036	10698	11150	10889
tr|A0A0P0WNC7|A0A0P0WNC7_ORYSJ;sp|O04226|P5CS1_ORYSJ	78;78	tr|A0A0P0WNC7|A0A0P0WNC7_ORYSJ	tr|A0A0P0WNC7|A0A0P0WNC7_ORYSJ	>tr|A0A0P0WNC7|A0A0P0WNC7_ORYSJ Os05g0455500 protein (Fragment) OS=Oryza sativa subsp. japonica OX=39947 GN=Os05g0455500 PE=3 SV=1;>sp|O04226|P5CS1_ORYSJ Delta-1-pyrroline-5-carboxylate synthase 1 OS=Oryza sativa subsp. japonica OX=39947 GN=P5CS1 PE=2 SV=2	0.865833	1.2e-19	132.34	1	S	VGVGRQRLRYRKLVNSSFADLQKPQMELDGK	X;X;X;X;X;X;X;X;X;X;X;X;X;X;X;Phospho (STY);X;X;X;X;X;X;X;X;X;X;X;X;X;X;X	XXXXXXXXXXXXPPPPPPPPPPPPPPPPPPP	LVNS(0.866)S(0.134)FADLQKPQMELDGK	4	4	-0.68148			11233	11233	6129.5	5435.6	5634.3	6916.6	6116.9	6322.5	5276.9	6250.1	5567.3
tr|A0A0P0WNC7|A0A0P0WNC7_ORYSJ;sp|O04226|P5CS1_ORYSJ	79;79	tr|A0A0P0WNC7|A0A0P0WNC7_ORYSJ	tr|A0A0P0WNC7|A0A0P0WNC7_ORYSJ	>tr|A0A0P0WNC7|A0A0P0WNC7_ORYSJ Os05g0455500 protein (Fragment) OS=Oryza sativa subsp. japonica OX=39947 GN=Os05g0455500 PE=3 SV=1;>sp|O04226|P5CS1_ORYSJ Delta-1-pyrroline-5-carboxylate synthase 1 OS=Oryza sativa subsp. japonica OX=39947 GN=P5CS1 PE=2 SV=2	0.810941	2.02e-19	142.61	1	S	GVGRQRLRYRKLVNSSFADLQKPQMELDGKA	X;X;X;X;X;X;X;X;X;X;X;X;X;X;X;Phospho (STY);X;X;X;X;X;X;X;X;X;X;X;X;X;X;X	XXXXXXXXXXXPPPPPPPPPPPPPPPPPPPX	LVNS(0.189)S(0.811)FADLQKPQMELDGK	5	3	-1.0621			11234;11235;11236;11237;11238	11234	41047	38441	39693	39879	38200	39175	39295	38554	39830
sp|O22386|RK12_ORYSJ;tr|Q9ZWF5|Q9ZWF5_ORYSJ	127;121	sp|O22386|RK12_ORYSJ;tr|Q9ZWF5|Q9ZWF5_ORYSJ	sp|O22386|RK12_ORYSJ	>sp|O22386|RK12_ORYSJ 50S ribosomal protein L12, chloroplastic OS=Oryza sativa subsp. japonica OX=39947 GN=RPL12-2 PE=2 SV=2;>tr|Q9ZWF5|Q9ZWF5_ORYSJ Os05g0568300 protein OS=Oryza sativa subsp. japonica OX=39947 GN=rpl12-1 PE=3 SV=1	0.702235	0.000332352	43.167	1	S	PAEKTEFDVVIEEVPSSARIASIKVVRALTN;PAEKTEFDVVIEEVPSSARIATIKVVRALTN	X;X;X;X;X;X;X;X;X;X;X;X;X;X;X;Phospho (STY);X;X;X;X;X;X;X;X;X;X;X;X;X;X;X	XXXXPPPPPPPPPPPPPPPXXXXXXXXXXXX	TEFDVVIEEVPS(0.702)S(0.298)AR	12	3	-0.92147			16679	16679	1640	1421.5	1581.8	1802.7	1542.6	2052.2	1418.1	1724.8	1581.8
sp|O22386|RK12_ORYSJ;tr|Q9ZWF5|Q9ZWF5_ORYSJ	128;122	sp|O22386|RK12_ORYSJ;tr|Q9ZWF5|Q9ZWF5_ORYSJ	sp|O22386|RK12_ORYSJ	>sp|O22386|RK12_ORYSJ 50S ribosomal protein L12, chloroplastic OS=Oryza sativa subsp. japonica OX=39947 GN=RPL12-2 PE=2 SV=2;>tr|Q9ZWF5|Q9ZWF5_ORYSJ Os05g0568300 protein OS=Oryza sativa subsp. japonica OX=39947 GN=rpl12-1 PE=3 SV=1	0.585199	0.000426103	36.104	1	S	AEKTEFDVVIEEVPSSARIASIKVVRALTNL;AEKTEFDVVIEEVPSSARIATIKVVRALTNL	X;X;X;X;X;X;X;X;X;X;X;X;X;X;X;Phospho (STY);X;X;X;X;X;X;X;X;X;X;X;X;X;X;X	XXXPPPPPPPPPPPPPPPXXXXXXXXXXXXX	TEFDVVIEEVPS(0.415)S(0.585)AR	13	3	-1.0079			16680	16680	2096.8	1753.6	1796.9	2137.3	2011.1	2153.1	1487.9	1950.1	2102.2
sp|O64464|PSB1_ORYSJ;tr|Q6ZIB4|Q6ZIB4_ORYSJ	159;157	sp|O64464|PSB1_ORYSJ	sp|O64464|PSB1_ORYSJ	>sp|O64464|PSB1_ORYSJ Proteasome subunit beta type-1 OS=Oryza sativa subsp. japonica OX=39947 GN=PBF1 PE=2 SV=1;>tr|Q6ZIB4|Q6ZIB4_ORYSJ Proteasome subunit beta OS=Oryza sativa subsp. japonica OX=39947 GN=Os08g0529100 PE=2 SV=1	0.878196	0.00962892	28.894	1	S	TGSALIMPVLDNQLKSPSPLLLPARDAVTPL	X;X;X;X;X;X;X;X;X;X;X;X;X;X;X;Phospho (STY);X;X;X;X;X;X;X;X;X;X;X;X;X;X;X	XXXXXXXXXXXXXXXPPPPPPPPPPXXXXXX	S(0.878)PS(0.122)PLLLPAR	1	2	-1.1746			15517	15517	3133.7	3005.3	2749.1	3195.1	2713.2	2917.7	3075	3165.7	3119
sp|O82117|CO3_ORYSJ	238	sp|O82117|CO3_ORYSJ	sp|O82117|CO3_ORYSJ	>sp|O82117|CO3_ORYSJ Zinc finger protein CO3 OS=Oryza sativa subsp. japonica OX=39947 GN=CO3 PE=2 SV=1	0.320837	4e-05	42.333		S	CGVPDITTSYLRSSKSTIDLFTAAAGSPVAA	X;X;X;X;X;X;X;X;X;X;X;X;X;X;X;Phospho (STY);X;X;X;X;X;X;X;X;X;X;Phospho (STY);X;X;X;X	XXXXXXXXXXXXPPPPPPPPPPPPPPPPPPP	S(0.259)S(0.278)KS(0.321)T(0.137)IDLFT(0.015)AAAGS(0.725)PVAAHS(0.322)IMS(0.942)PPQFMGAIDR	4	4	-0.067332				15729	0	0	0	0	0	0	0	0	0
sp|O82117|CO3_ORYSJ	249	sp|O82117|CO3_ORYSJ	sp|O82117|CO3_ORYSJ	>sp|O82117|CO3_ORYSJ Zinc finger protein CO3 OS=Oryza sativa subsp. japonica OX=39947 GN=CO3 PE=2 SV=1	0.725381	4e-05	42.333	3	S	RSSKSTIDLFTAAAGSPVAAHSIMSPPQFMG	X;X;X;X;Phospho (STY);X;X;X;X;X;X;X;X;X;X;Phospho (STY);X;X;X;X;X;X;X;X;Phospho (STY);X;X;X;X;X;X	XPPPPPPPPPPPPPPPPPPPPPPPPPPPPPP	S(0.259)S(0.278)KS(0.321)T(0.137)IDLFT(0.015)AAAGS(0.725)PVAAHS(0.322)IMS(0.942)PPQFMGAIDR	15	4	-0.067332			15729	15729	309.29	356.17	483.18	559.44	409.05	447.72	599.96	625.78	440.06
sp|O82117|CO3_ORYSJ	258	sp|O82117|CO3_ORYSJ	sp|O82117|CO3_ORYSJ	>sp|O82117|CO3_ORYSJ Zinc finger protein CO3 OS=Oryza sativa subsp. japonica OX=39947 GN=CO3 PE=2 SV=1	0.942391	4e-05	42.333	3	S	FTAAAGSPVAAHSIMSPPQFMGAIDREARVH	X;X;X;X;X;X;Phospho (STY);X;X;X;X;X;X;X;X;Phospho (STY);X;X;X;X;X;X;X;X;X;X;X;X;X;X;X	PPPPPPPPPPPPPPPPPPPPPPPPPPXXXXX	S(0.259)S(0.278)KS(0.321)T(0.137)IDLFT(0.015)AAAGS(0.725)PVAAHS(0.322)IMS(0.942)PPQFMGAIDR	24	4	-0.067332			15729	15729	309.29	356.17	483.18	559.44	409.05	447.72	599.96	625.78	440.06
sp|P0C2Z3|ATPE_ORYSJ	136	sp|P0C2Z3|ATPE_ORYSJ	sp|P0C2Z3|ATPE_ORYSJ	>sp|P0C2Z3|ATPE_ORYSJ ATP synthase epsilon chain, chloroplastic OS=Oryza sativa subsp. japonica OX=39947 GN=atpE PE=3 SV=1	1	0.00955221	40.106	1	S	RRARIRVEAVNWIPPSN______________	X;X;X;X;X;X;X;X;X;X;X;X;X;X;X;Phospho (STY);X;X;X;X;X;X;X;X;X;X;X;X;X;X;X	XXXXXXPPPPPPPPPPPXXXXXXXXXXXXXX	VEAVNWIPPS(1)N	10	2	-1.1425			18102	18102	1000.9	838.81	740.89	954.7	662	957.74	959.4	1063.1	954.24
sp|P0C2Z6|ATPA_ORYSJ	125	sp|P0C2Z6|ATPA_ORYSJ	sp|P0C2Z6|ATPA_ORYSJ	>sp|P0C2Z6|ATPA_ORYSJ ATP synthase subunit alpha, chloroplastic OS=Oryza sativa subsp. japonica OX=39947 GN=atpA PE=3 SV=1	0.978519	0.0045633	52.371	1	S	NALAKPIDGRGEIVASESRLIESPAPGIISR	X;X;X;X;X;X;X;X;X;X;X;X;X;X;X;Phospho (STY);X;X;X;X;X;X;X;X;X;X;X;X;X;X;X	XXXXXXXXXXPPPPPPPPPXXXXXXXXXXXX	GEIVAS(0.979)ES(0.021)R	6	2	0.40359			6179;6180	6179	16405	21298	16125	17044	12921	13742	13366	16212	11939
sp|P0C2Z6|ATPA_ORYSJ	448	sp|P0C2Z6|ATPA_ORYSJ	sp|P0C2Z6|ATPA_ORYSJ	>sp|P0C2Z6|ATPA_ORYSJ ATP synthase subunit alpha, chloroplastic OS=Oryza sativa subsp. japonica OX=39947 GN=atpA PE=3 SV=1	0.999998	1.06e-05	81.686	1	S	EQIATIYIGTRGYLDSLEIGQVKKFLDELRK	X;X;X;X;X;X;X;X;X;X;X;X;X;X;X;Phospho (STY);X;X;X;X;X;X;X;X;X;X;X;X;X;X;X	XXXXXXXXXXXPPPPPPPPPPPPXXXXXXXX	GYLDS(1)LEIGQVK	5	3	0.42747			7677;7678	7678	4291.3	5069.6	4529.1	3785.1	4108.3	4901.8	4391.2	4440.9	4733.8
sp|P0C422|PSBH_ORYSJ	9	sp|P0C422|PSBH_ORYSJ	sp|P0C422|PSBH_ORYSJ	>sp|P0C422|PSBH_ORYSJ Photosystem II reaction center protein H OS=Oryza sativa subsp. japonica OX=39947 GN=psbH PE=3 SV=1	0.471979	0.00220416	27.868		S	_______MATQTVEDSSRPGPRQTRVGNLLK	X;X;X;X;X;X;X;X;X;X;X;X;X;X;X;Phospho (STY);X;X;X;X;X;X;X;X;X;X;X;X;X;X;X	XXXXXXXXPPPPPPPPPPPPPPXXXXXXXXX	AT(0.008)QT(0.048)VEDS(0.472)S(0.472)RPGPR	8	2	-0.1587				2128	0	0	0	0	0	0	0	0	0
sp|P0C422|PSBH_ORYSJ	10	sp|P0C422|PSBH_ORYSJ	sp|P0C422|PSBH_ORYSJ	>sp|P0C422|PSBH_ORYSJ Photosystem II reaction center protein H OS=Oryza sativa subsp. japonica OX=39947 GN=psbH PE=3 SV=1	0.471979	0.00220416	27.868		S	______MATQTVEDSSRPGPRQTRVGNLLKP	X;X;X;X;X;X;X;X;X;X;X;X;X;X;X;X;X;X;X;X;X;X;X;X;X;X;X;X;X;X;X	XXXXXXXXXXXXXXXXXXXXXXXXXXXXXXX	AT(0.008)QT(0.048)VEDS(0.472)S(0.472)RPGPR	9	2	-0.1587				2128	0	0	0	0	0	0	0	0	0
sp|P0C491|RR7_ORYSJ	94	sp|P0C491|RR7_ORYSJ	sp|P0C491|RR7_ORYSJ	>sp|P0C491|RR7_ORYSJ 30S ribosomal protein S7, chloroplastic OS=Oryza sativa subsp. japonica OX=39947 GN=rps7-A PE=3 SV=1	1	0.00147391	51.843	1	S	RNKKGSTRKVPIEIGSKQGRALAIRWLLEAS	X;X;X;X;X;X;X;X;X;X;X;X;X;X;X;Phospho (STY);X;X;X;X;X;X;X;X;X;X;X;X;X;X;X	XXXXXXXXPPPPPPPPPXXXXXXXXXXXXXX	KVPIEIGS(1)K	8	3	-0.20334			9550;9551;9552	9552	27707	27790	26782	27784	30121	29390	27476	26252	28200
sp|P0C512|RBL_ORYSJ;tr|Q8S6F2|Q8S6F2_ORYSJ;tr|A0A0P0Y838|A0A0P0Y838_ORYSJ;tr|A0A0P0V969|A0A0P0V969_ORYSJ	477;477;477;269	sp|P0C512|RBL_ORYSJ	sp|P0C512|RBL_ORYSJ	>sp|P0C512|RBL_ORYSJ Ribulose bisphosphate carboxylase large chain OS=Oryza sativa subsp. japonica OX=39947 GN=rbcL PE=1 SV=1;>tr|Q8S6F2|Q8S6F2_ORYSJ Ribulose bisphosphate carboxylase large chain OS=Oryza sativa subsp. japonica OX=39947 GN=Os10g0356000 PE=	1	6.9e-09	101.16	1	S	WKAIKFEFEPVDKLDS_______________	X;X;X;X;X;X;X;X;X;X;X;X;X;X;X;Phospho (STY);X;X;X;X;X;X;X;X;X;X;X;X;X;X;X	XXPPPPPPPPPPPPPPXXXXXXXXXXXXXXX	FEFEPVDKLDS(1)	11	3	0.29129			988;989;990;991;992;993;5397;5398;5399;5400;5401;5402;5403;5404;5405;5406;5407;5408	5407	108540	109190	103880	89305	86186	90958	88985	88957	87535
sp|P0C512|RBL_ORYSJ;tr|Q8S6F2|Q8S6F2_ORYSJ;tr|A0A0P0Y838|A0A0P0Y838_ORYSJ;tr|A0A0P0V969|A0A0P0V969_ORYSJ	447;447;447;239	sp|P0C512|RBL_ORYSJ	sp|P0C512|RBL_ORYSJ	>sp|P0C512|RBL_ORYSJ Ribulose bisphosphate carboxylase large chain OS=Oryza sativa subsp. japonica OX=39947 GN=rbcL PE=1 SV=1;>tr|Q8S6F2|Q8S6F2_ORYSJ Ribulose bisphosphate carboxylase large chain OS=Oryza sativa subsp. japonica OX=39947 GN=Os10g0356000 PE=	1	7.34e-05	52.989	1	S	NEGRDLAREGNEIIRSACKWSPELAAACEIW	X;X;X;X;X;X;X;X;X;X;X;X;X;X;X;Phospho (STY);X;X;X;X;X;X;X;X;X;X;X;X;X;X;X	XXXXXXXXPPPPPPPPPPPXXXXXXXXXXXX	EGNEIIRS(1)ACK	8	2	3.7035			4061;4062;4063;4064;4065	4065	33128	31964	33133	32599	31190	33201	30900	31882	33104
sp|P0DKK0|PRS7B_ORYSJ;sp|P0DKJ9|PRS7A_ORYSJ	96;96	sp|P0DKK0|PRS7B_ORYSJ	sp|P0DKK0|PRS7B_ORYSJ	>sp|P0DKK0|PRS7B_ORYSJ 26S proteasome regulatory subunit 7B OS=Oryza sativa subsp. japonica OX=39947 GN=RPT1B PE=2 SV=1;>sp|P0DKJ9|PRS7A_ORYSJ 26S proteasome regulatory subunit 7A OS=Oryza sativa subsp. japonica OX=39947 GN=RPT1A PE=2 SV=1	0.981293	0.00309866	34.611	1	S	QEEQPLQVARCTKIISPNTDDAKYVINVKQI	X;X;X;X;X;X;X;X;X;X;X;X;X;X;X;Phospho (STY);X;X;X;X;X;X;X;X;X;X;X;X;X;X;X	XXXXXXXXXXXXXPPPPPPPPPPXXXXXXXX	IIS(0.981)PNT(0.019)DDAK	3	2	-1.6149			8379	8379	4042.7	4095.4	3963.8	3944.2	3301.1	4359	4211.9	3609.9	3805.2
tr|Q94DM7|Q94DM7_ORYSJ;sp|P0DKK9|RS10B_ORYSJ;sp|P0DKK8|RS10A_ORYSJ	155;155;155	tr|Q94DM7|Q94DM7_ORYSJ	tr|Q94DM7|Q94DM7_ORYSJ	>tr|Q94DM7|Q94DM7_ORYSJ Os01g0962600 protein OS=Oryza sativa subsp. japonica OX=39947 GN=Os01g0962600 PE=4 SV=1;>sp|P0DKK9|RS10B_ORYSJ 40S ribosomal protein S10-2 OS=Oryza sativa subsp. japonica OX=39947 GN=RPS10-2 PE=2 SV=1;>sp|P0DKK8|RS10A_ORYSJ 40S ribo	1	0.000320608	56.246	1	S	DFGGEKGGAPAEFQPSFRGSRPGFGRGGGGA	X;X;X;X;X;X;X;X;X;X;X;X;X;X;X;Phospho (STY);X;X;X;X;X;X;X;X;X;X;X;X;X;X;X	XXXXXXPPPPPPPPPPPPXXXXXXXXXXXXX	GGAPAEFQPS(1)FR	10	3	-0.15498			6334;6335;6336	6336	16850	15785	16569	14661	13879	15345	17658	18545	17309
sp|P12085|ATPB_ORYSJ;tr|A0A0P0XTT3|A0A0P0XTT3_ORYSJ	127;49	sp|P12085|ATPB_ORYSJ	sp|P12085|ATPB_ORYSJ	>sp|P12085|ATPB_ORYSJ ATP synthase subunit beta, chloroplastic OS=Oryza sativa subsp. japonica OX=39947 GN=atpB PE=1 SV=2;>tr|A0A0P0XTT3|A0A0P0XTT3_ORYSJ ATP synthase subunit beta OS=Oryza sativa subsp. japonica OX=39947 GN=Os10g0355800 PE=3 SV=1	0.737784	1.06e-11	72.256	1	S	NVLGEPVDNLGPVDTSATFPIHRSAPAFIEL	X;X;X;X;X;X;X;X;X;X;X;X;X;X;X;Phospho (STY);X;X;X;X;X;X;X;Phospho (STY);X;X;X;X;X;X;X	PPPPPPPPPPPPPPPPPPPPPPPXXXXXXXX	IFNVLGEPVDNLGPVDT(0.204)S(0.738)AT(0.058)FPIHR	18	4	-0.93471			8188;8189;8190;8192;8193;8194	8189	2560.8	3012.2	3026.5	2732.5	2875.9	2907.3	2656.5	2359	2711.5
sp|P12085|ATPB_ORYSJ;tr|A0A0P0XTT3|A0A0P0XTT3_ORYSJ;tr|A0A0P0Y832|A0A0P0Y832_ORYSJ;tr|A0A0P0WRU0|A0A0P0WRU0_ORYSJ	294;216;216;3	sp|P12085|ATPB_ORYSJ	sp|P12085|ATPB_ORYSJ	>sp|P12085|ATPB_ORYSJ ATP synthase subunit beta, chloroplastic OS=Oryza sativa subsp. japonica OX=39947 GN=atpB PE=1 SV=2;>tr|A0A0P0XTT3|A0A0P0XTT3_ORYSJ ATP synthase subunit beta OS=Oryza sativa subsp. japonica OX=39947 GN=Os10g0355800 PE=3 SV=1;>tr|A0A0P	0.620089	5.37e-14	81.557	1	S	VQAGSEVSALLGRMPSAVGYQPTLSTEMGSL	X;X;X;X;X;X;X;X;X;X;X;X;X;X;X;Phospho (STY);X;X;X;X;X;X;X;X;X;X;X;X;X;X;X	XXXXXXXXXXXXXPPPPPPPPPPPPPPPPPP	MPS(0.62)AVGY(0.289)QPT(0.083)LS(0.004)T(0.004)EMGSLQER	3	3	0.093275			11739;11740	11740	2351.9	1990.2	1789.3	2315.1	2565.9	2249.6	2610.3	2483.4	3235.1
sp|P12085|ATPB_ORYSJ;tr|A0A0P0XTT3|A0A0P0XTT3_ORYSJ;tr|A0A0P0Y832|A0A0P0Y832_ORYSJ	135;57;57	sp|P12085|ATPB_ORYSJ	sp|P12085|ATPB_ORYSJ	>sp|P12085|ATPB_ORYSJ ATP synthase subunit beta, chloroplastic OS=Oryza sativa subsp. japonica OX=39947 GN=atpB PE=1 SV=2;>tr|A0A0P0XTT3|A0A0P0XTT3_ORYSJ ATP synthase subunit beta OS=Oryza sativa subsp. japonica OX=39947 GN=Os10g0355800 PE=3 SV=1;>tr|A0A0P	1	2.52e-05	121.88	1	S	NLGPVDTSATFPIHRSAPAFIELDTKLSIFE	X;X;X;X;X;X;Phospho (STY);Phospho (STY);X;X;X;X;X;X;X;Phospho (STY);X;X;X;X;X;X;X;X;X;X;X;X;X;X;X	XXXXXXXXXXXXXXXPPPPPPPPPPPXXXXX	S(1)APAFIELDTK	1	2	0.22784			14103;14104;14105;14106;14107;14108	14106	33838	32384	30268	32429	30904	32926	31395	32606	33012
sp|P12085|ATPB_ORYSJ	8	sp|P12085|ATPB_ORYSJ	sp|P12085|ATPB_ORYSJ	>sp|P12085|ATPB_ORYSJ ATP synthase subunit beta, chloroplastic OS=Oryza sativa subsp. japonica OX=39947 GN=atpB PE=1 SV=2	0.73526	1.2e-08	73.817	1	S	________MRTNPTTSRPGVSTIEEKSTGRI	X;X;X;X;X;X;X;X;X;X;X;X;X;X;X;Phospho (STY);X;X;X;X;X;X;X;X;X;X;X;X;X;X;X	XXXXXXXXXXPPPPPPPPPPPPPPPPXXXXX	TNPT(0.015)T(0.249)S(0.735)RPGVSTIEEK	6	3	-0.33744			17194;17198	17198	25703	24979	24854	46414	43467	44795	24921	26182	24699
sp|P12085|ATPB_ORYSJ	13	sp|P12085|ATPB_ORYSJ	sp|P12085|ATPB_ORYSJ	>sp|P12085|ATPB_ORYSJ ATP synthase subunit beta, chloroplastic OS=Oryza sativa subsp. japonica OX=39947 GN=atpB PE=1 SV=2	0.851634	3.03e-09	77.739	1	S	___MRTNPTTSRPGVSTIEEKSTGRIDQIIG	X;X;X;X;X;X;X;X;X;X;X;X;X;X;X;Phospho (STY);X;X;X;X;X;X;X;X;X;X;X;X;X;X;X	XXXXXPPPPPPPPPPPPPPPPXXXXXXXXXX	TNPT(0.001)T(0.004)S(0.001)RPGVS(0.852)T(0.142)IEEK	11	3	-0.51486			17199	17199	11366	11810	11381	18134	16732	17949	12866	13053	12078
sp|P12330|CB21_ORYSJ	44	sp|P12330|CB21_ORYSJ	sp|P12330|CB21_ORYSJ	>sp|P12330|CB21_ORYSJ Chlorophyll a-b binding protein 1, chloroplastic OS=Oryza sativa subsp. japonica OX=39947 GN=CAB1R PE=2 SV=2	0.498792	7.93e-12	120.24		S	RITMRKTAAKPKPAASSGSPWYGADRVLYLG	X;X;X;X;X;X;Phospho (STY);X;X;X;X;X;X;X;X;Phospho (STY);X;X;X;X;X;X;X;X;X;X;X;X;X;X;X	XXXXXXXXXXPPPPPPPPPPPPPPPPXXXXX	PAAS(0.499)S(0.499)GS(0.002)PWYGADR	4	2	-0.43618				12641	0	0	0	0	0	0	0	0	0
sp|P12330|CB21_ORYSJ	45	sp|P12330|CB21_ORYSJ	sp|P12330|CB21_ORYSJ	>sp|P12330|CB21_ORYSJ Chlorophyll a-b binding protein 1, chloroplastic OS=Oryza sativa subsp. japonica OX=39947 GN=CAB1R PE=2 SV=2	0.498792	7.93e-12	120.24		S	ITMRKTAAKPKPAASSGSPWYGADRVLYLGP	X;X;X;X;X;Phospho (STY);X;X;X;X;X;X;X;X;X;X;X;X;X;X;X;X;X;X;X;X;X;X;X;X;X	XXXXXXXXXXXXXXXXXXXXXXXXXXXXXXX	PAAS(0.499)S(0.499)GS(0.002)PWYGADR	5	2	-0.43618				12641	0	0	0	0	0	0	0	0	0
sp|P12331|CB22_ORYSJ	41	sp|P12331|CB22_ORYSJ	sp|P12331|CB22_ORYSJ	>sp|P12331|CB22_ORYSJ Chlorophyll a-b binding protein 2, chloroplastic OS=Oryza sativa subsp. japonica OX=39947 GN=CAB2R PE=2 SV=2	0.962091	2.4e-06	67.337	1	S	RITMRKSAAKPKPAASGSPWYGADRVLYLGP	X;X;X;X;X;X;X;X;X;X;X;X;X;X;X;Phospho (STY);X;X;X;X;X;X;X;X;X;X;X;X;X;X;X	XXXXXXXXXXXXPPPPPPPPPPPPPXXXXXX	PAAS(0.962)GS(0.038)PWYGADR	4	2	0.6251			12627;12629;12630	12627	20984	19307	19828	21027	21425	21540	19700	18340	17821
sp|P12331|CB22_ORYSJ	43	sp|P12331|CB22_ORYSJ	sp|P12331|CB22_ORYSJ	>sp|P12331|CB22_ORYSJ Chlorophyll a-b binding protein 2, chloroplastic OS=Oryza sativa subsp. japonica OX=39947 GN=CAB2R PE=2 SV=2	0.97834	2.84e-06	84.423	1	S	TMRKSAAKPKPAASGSPWYGADRVLYLGPLS	X;X;X;X;X;X;X;X;X;X;X;X;X;X;X;Phospho (STY);X;X;X;X;X;X;X;X;X;X;X;X;X;X;X	XXXXXXXXXXPPPPPPPPPPPPPXXXXXXXX	PAAS(0.021)GS(0.978)PWYGADR	6	2	-0.89404			12626;12628	12626	14499	11042	13127	14391	14764	13986	12317	11979	12673
sp|P12331|CB22_ORYSJ	32	sp|P12331|CB22_ORYSJ	sp|P12331|CB22_ORYSJ	>sp|P12331|CB22_ORYSJ Chlorophyll a-b binding protein 2, chloroplastic OS=Oryza sativa subsp. japonica OX=39947 GN=CAB2R PE=2 SV=2	0.999991	1.49e-19	156.31	1	S	AAAKVFGEGRITMRKSAAKPKPAASGSPWYG	X;X;X;X;X;X;X;X;X;X;X;X;X;X;X;Phospho (STY);X;X;X;X;X;X;X;X;Phospho (STY);X;Phospho (STY);X;X;X;X	XXXXXXXXXXXXXXXPPPPPPPPPPPPPPPP	S(1)AAKPKPAASGSPWYGADR	1	2	0.26181			13987;13988;13989;13990;13991;13992;13993;13994;13995;13996;13997;13998;13999;14000;14001;14002;14003;14004;14005;14006	14003	202800	201100	200570	283570	267790	281540	190490	186830	190950
sp|P14655|GLNA2_ORYSJ	104	sp|P14655|GLNA2_ORYSJ	sp|P14655|GLNA2_ORYSJ	>sp|P14655|GLNA2_ORYSJ Glutamine synthetase, chloroplastic OS=Oryza sativa subsp. japonica OX=39947 GN=GLN2 PE=1 SV=1	0.994354	0.0019502	33.44	1	S	LRSKSRTISKPVEDPSELPKWNYDGSSTGQA	X;X;X;X;X;X;X;X;X;X;X;X;X;X;X;Phospho (STY);X;X;X;X;X;X;X;X;X;Phospho (STY);Phospho (STY);X;X;X;X	XXXXXXPPPPPPPPPPPPPPXXXXXXXXXXX	T(0.001)IS(0.004)KPVEDPS(0.994)ELPK	10	3	-0.37463			16992;16993;16994	16993	16077	16611	15343	17890	17029	16975	18388	17853	17452
sp|P14655|GLNA2_ORYSJ	177	sp|P14655|GLNA2_ORYSJ	sp|P14655|GLNA2_ORYSJ	>sp|P14655|GLNA2_ORYSJ Glutamine synthetase, chloroplastic OS=Oryza sativa subsp. japonica OX=39947 GN=GLN2 PE=1 SV=1	0.999942	3.05e-05	45.146	1	S	KRNRAAQVFSDPKVVSQVPWFGIEQEYTLLQ	X;X;X;X;X;X;X;X;X;X;X;X;X;X;X;Phospho (STY);X;X;X;X;X;X;X;X;X;X;X;X;X;X;X	XXXXXXXXXXXXXPPPPPPPPPPPPPPPPPP	VVS(1)QVPWFGIEQEYTLLQR	3	3	-0.52847			19346	19346	364.63	288.25	182.69	382.95	335.6	300.18	252.91	241.59	232.95
sp|P14655|GLNA2_ORYSJ;sp|P14654|GLN12_ORYSJ;sp|P14656|GLN11_ORYSJ	114;58;58	sp|P14655|GLNA2_ORYSJ;sp|P14656|GLN11_ORYSJ	sp|P14655|GLNA2_ORYSJ	>sp|P14655|GLNA2_ORYSJ Glutamine synthetase, chloroplastic OS=Oryza sativa subsp. japonica OX=39947 GN=GLN2 PE=1 SV=1;>sp|P14654|GLN12_ORYSJ Glutamine synthetase cytosolic isozyme 1-2 OS=Oryza sativa subsp. japonica OX=39947 GN=GLN1-2 PE=1 SV=1;>sp|P14656|	0.672302	1.91e-10	60.169	1	S	PVEDPSELPKWNYDGSSTGQAPGEDSEVILY;PVTDPSKLPKWNYDGSSTGQAPGEDSEVILY	X;X;X;X;X;Phospho (STY);X;X;X;X;X;X;X;X;X;Phospho (STY);X;X;X;X;X;X;X;X;X;X;X;X;X;X;X	XXXXXXXXXXPPPPPPPPPPPPPPPPPPPPP	WNY(0.002)DGS(0.672)S(0.237)T(0.087)GQAPGEDS(0.002)EVILYPQAIFK	6	3	-0.63357			19514	19514	888.38	1246.1	1009.4	718.85	950.66	910.59	1076.3	1185.6	1364.5
sp|P14655|GLNA2_ORYSJ;sp|P14654|GLN12_ORYSJ;sp|P14656|GLN11_ORYSJ	115;59;59	sp|P14655|GLNA2_ORYSJ;sp|P14656|GLN11_ORYSJ	sp|P14655|GLNA2_ORYSJ	>sp|P14655|GLNA2_ORYSJ Glutamine synthetase, chloroplastic OS=Oryza sativa subsp. japonica OX=39947 GN=GLN2 PE=1 SV=1;>sp|P14654|GLN12_ORYSJ Glutamine synthetase cytosolic isozyme 1-2 OS=Oryza sativa subsp. japonica OX=39947 GN=GLN1-2 PE=1 SV=1;>sp|P14656|	0.672846	6.49e-16	83.972	1	S	VEDPSELPKWNYDGSSTGQAPGEDSEVILYP;VTDPSKLPKWNYDGSSTGQAPGEDSEVILYP	X;X;X;X;Phospho (STY);X;X;X;X;X;X;X;X;X;X;Phospho (STY);X;X;X;X;X;X;X;X;X;X;X;X;X;X;X	XXXXXXXXXPPPPPPPPPPPPPPPPPPPPPP	WNYDGS(0.142)S(0.673)T(0.185)GQAPGEDSEVILYPQAIFK	7	3	1.2432			19511;19512;19515;19516;19519	19516	10802	11188	10053	10071	9813.4	10004	10099	12013	10748
sp|P14656|GLN11_ORYSJ	115	sp|P14656|GLN11_ORYSJ	sp|P14656|GLN11_ORYSJ	>sp|P14656|GLN11_ORYSJ Glutamine synthetase cytosolic isozyme 1-1 OS=Oryza sativa subsp. japonica OX=39947 GN=GLN1-1 PE=1 SV=1	0.49958	4.81e-10	70.939		S	EPIPTNKRHNAAKIFSSPEVASEEPWYGIEQ	X;X;X;X;X;X;X;X;X;X;X;X;X;X;X;Phospho (STY);X;X;X;X;X;X;X;X;X;X;X;X;X;X;X	XXXXXXXXXXXXXPPPPPPPPPPPPPPPPPP	IFS(0.5)S(0.5)PEVAS(0.001)EEPWYGIEQEYTLLQK	3	3	0.29348				8224	0	0	0	0	0	0	0	0	0
sp|P14656|GLN11_ORYSJ	116	sp|P14656|GLN11_ORYSJ	sp|P14656|GLN11_ORYSJ	>sp|P14656|GLN11_ORYSJ Glutamine synthetase cytosolic isozyme 1-1 OS=Oryza sativa subsp. japonica OX=39947 GN=GLN1-1 PE=1 SV=1	0.49958	4.81e-10	70.939		S	PIPTNKRHNAAKIFSSPEVASEEPWYGIEQE	X;X;X;X;X;X;X;X;X;X;X;X;X;X;X;X;X;X;X;X;X;X;X;X;X;X;X;X;X;X;X	XXXXXXXXXXXXXXXXXXXXXXXXXXXXXXX	IFS(0.5)S(0.5)PEVAS(0.001)EEPWYGIEQEYTLLQK	4	3	0.29348				8224	0	0	0	0	0	0	0	0	0
sp|P14656|GLN11_ORYSJ	41	sp|P14656|GLN11_ORYSJ	sp|P14656|GLN11_ORYSJ	>sp|P14656|GLN11_ORYSJ Glutamine synthetase cytosolic isozyme 1-1 OS=Oryza sativa subsp. japonica OX=39947 GN=GLN1-1 PE=1 SV=1	0.904306	0.000318197	54.125	1	S	IGGSGMDLRSKARTLSGPVTDPSKLPKWNYD	X;X;X;X;X;X;X;X;X;X;X;X;X;X;X;Phospho (STY);X;X;X;X;X;X;X;X;X;X;X;X;X;X;X	XXXXXXXXXXXXXPPPPPPPPPPPXXXXXXX	T(0.043)LS(0.904)GPVT(0.053)DPSK	3	2	-0.018281			17120;17121;17122;17123;17124;17125	17124	35527	35260	31624	36248	33675	36773	42019	41331	41435
tr|A0A0P0VM36|A0A0P0VM36_ORYSJ;tr|A0A0P0VLX6|A0A0P0VLX6_ORYSJ;sp|P14717|PAL1_ORYSJ;tr|Q7X720|Q7X720_ORYSJ;tr|A0A0P0VLY5|A0A0P0VLY5_ORYSJ;tr|A0A0N7KFQ4|A0A0N7KFQ4_ORYSJ;sp|Q0DZE0|PAL2_ORYSJ;tr|Q7X8V3|Q7X8V3_ORYSJ;tr|A0A0P0VM80|A0A0P0VM80_ORYSJ;tr|Q75HQ7|Q75HQ7_ORYSJ;tr|Q6K6Q1|Q6K6Q1_ORYSJ	63;107;437;441;154;247;447;448;449;450;452	tr|A0A0P0VM36|A0A0P0VM36_ORYSJ	tr|A0A0P0VM36|A0A0P0VM36_ORYSJ	>tr|A0A0P0VM36|A0A0P0VM36_ORYSJ Os02g0626100 protein (Fragment) OS=Oryza sativa subsp. japonica OX=39947 GN=Os02g0626100 PE=4 SV=1;>tr|A0A0P0VLX6|A0A0P0VLX6_ORYSJ Os02g0626100 protein (Fragment) OS=Oryza sativa subsp. japonica OX=39947 GN=Os02g0626100 PE=3	0.977208	0.0181606	33.686	1	S	YNNGLTSNLAGSRNPSLDYGFKGTEIAMASY	X;X;X;X;X;X;X;X;X;X;X;X;X;X;X;Phospho (STY);X;X;X;X;X;X;X;X;X;X;X;X;X;X;X	XXXXXXXXXXXXXPPPPPPPPPXXXXXXXXX	NPS(0.977)LDY(0.023)GFK	3	2	2.2765			12400	12400	5169.8	4765	4392.7	4097.3	4211.5	4481.5	5544.4	5997	5515
tr|A0A0P0XGZ0|A0A0P0XGZ0_ORYSJ;tr|A0A0P0XHI7|A0A0P0XHI7_ORYSJ;tr|Q6ZC33|Q6ZC33_ORYSJ;sp|P16081|NIA1_ORYSJ	243;415;623;623	tr|A0A0P0XGZ0|A0A0P0XGZ0_ORYSJ	tr|A0A0P0XGZ0|A0A0P0XGZ0_ORYSJ	>tr|A0A0P0XGZ0|A0A0P0XGZ0_ORYSJ Os08g0468100 protein (Fragment) OS=Oryza sativa subsp. japonica OX=39947 GN=Os08g0468100 PE=4 SV=1;>tr|A0A0P0XHI7|A0A0P0XHI7_ORYSJ Os08g0468100 protein (Fragment) OS=Oryza sativa subsp. japonica OX=39947 GN=Os08g0468100 PE=3	0.615395	1.56e-22	95.304	2	S	DTYRIGELITTGAGYSSDNSVHGASNLSQLA	X;X;X;X;X;X;X;X;X;X;X;X;X;X;X;Phospho (STY);Phospho (STY);X;X;X;X;X;X;X;X;X;X;X;X;X;X	XXXXPPPPPPPPPPPPPPPPPPPPPPPPPPP	IGELITTGAGY(0.154)S(0.615)S(0.615)DNS(0.615)VHGASNLSQLAPIR	12	3	-0.012349			8262;8264	8262	1581.3	1796.9	1176.7	1415.1	1735.1	1577.5	943.26	1017.1	1105.9
tr|A0A0P0XGZ0|A0A0P0XGZ0_ORYSJ;tr|A0A0P0XHI7|A0A0P0XHI7_ORYSJ;tr|Q6ZC33|Q6ZC33_ORYSJ;sp|P16081|NIA1_ORYSJ	244;416;624;624	tr|A0A0P0XGZ0|A0A0P0XGZ0_ORYSJ	tr|A0A0P0XGZ0|A0A0P0XGZ0_ORYSJ	>tr|A0A0P0XGZ0|A0A0P0XGZ0_ORYSJ Os08g0468100 protein (Fragment) OS=Oryza sativa subsp. japonica OX=39947 GN=Os08g0468100 PE=4 SV=1;>tr|A0A0P0XHI7|A0A0P0XHI7_ORYSJ Os08g0468100 protein (Fragment) OS=Oryza sativa subsp. japonica OX=39947 GN=Os08g0468100 PE=3	0.615395	1.56e-22	95.304	2	S	TYRIGELITTGAGYSSDNSVHGASNLSQLAP	X;X;X;X;X;X;X;X;X;X;X;X;X;X;Phospho (STY);Phospho (STY);X;X;X;X;X;X;X;X;X;X;X;X;X;X;X	XXXPPPPPPPPPPPPPPPPPPPPPPPPPPPP	IGELITTGAGY(0.154)S(0.615)S(0.615)DNS(0.615)VHGASNLSQLAPIR	13	3	-0.012349			8262;8264	8262	1581.3	1796.9	1176.7	1415.1	1735.1	1577.5	943.26	1017.1	1105.9
tr|A0A0P0XGZ0|A0A0P0XGZ0_ORYSJ;tr|A0A0P0XHI7|A0A0P0XHI7_ORYSJ;tr|Q6ZC33|Q6ZC33_ORYSJ;sp|P16081|NIA1_ORYSJ	247;419;627;627	tr|A0A0P0XGZ0|A0A0P0XGZ0_ORYSJ	tr|A0A0P0XGZ0|A0A0P0XGZ0_ORYSJ	>tr|A0A0P0XGZ0|A0A0P0XGZ0_ORYSJ Os08g0468100 protein (Fragment) OS=Oryza sativa subsp. japonica OX=39947 GN=Os08g0468100 PE=4 SV=1;>tr|A0A0P0XHI7|A0A0P0XHI7_ORYSJ Os08g0468100 protein (Fragment) OS=Oryza sativa subsp. japonica OX=39947 GN=Os08g0468100 PE=3	0.615395	1.56e-22	95.304	2	S	IGELITTGAGYSSDNSVHGASNLSQLAPIRE	X;X;X;X;X;X;X;X;X;X;X;X;X;X;X;X;X;X;X;X;X;X;X;X;X;X;X;X;X;X;X	XXXXXXXXXXXXXXXXXXXXXXXXXXXXXXX	IGELITTGAGY(0.154)S(0.615)S(0.615)DNS(0.615)VHGASNLSQLAPIR	16	3	-0.012349			8262;8264	8262	1581.3	1796.9	1176.7	1415.1	1735.1	1577.5	943.26	1017.1	1105.9
tr|A0A0P0XGZ0|A0A0P0XGZ0_ORYSJ;tr|A0A0P0XHI7|A0A0P0XHI7_ORYSJ;tr|Q6ZC33|Q6ZC33_ORYSJ;sp|P16081|NIA1_ORYSJ	152;324;532;532	tr|A0A0P0XGZ0|A0A0P0XGZ0_ORYSJ	tr|A0A0P0XGZ0|A0A0P0XGZ0_ORYSJ	>tr|A0A0P0XGZ0|A0A0P0XGZ0_ORYSJ Os08g0468100 protein (Fragment) OS=Oryza sativa subsp. japonica OX=39947 GN=Os08g0468100 PE=4 SV=1;>tr|A0A0P0XHI7|A0A0P0XHI7_ORYSJ Os08g0468100 protein (Fragment) OS=Oryza sativa subsp. japonica OX=39947 GN=Os08g0468100 PE=3	0.947161	2.11e-08	179.43	1	S	LETAEAAAPGLKRSTSTPFMNTTDGKQFTMS	X;X;X;X;X;X;X;X;X;X;X;X;X;X;X;Phospho (STY);X;X;X;Oxidation (M);X;X;X;X;X;X;X;X;X;X;X	XXXXXXXXXXXXXPPPPPPPPPPPPPXXXXX	S(0.001)T(0.001)S(0.947)T(0.051)PFMNTTDGK	3	2	-0.20438			16123;16124;16125;16126;16127;16129;16130;16131;16132;16133;16134;16135;16136;16137;16138;16139;16140;16141	16131	195920	194030	186860	177490	176300	178340	151870	145620	146330
sp|P17784|ALFC1_ORYSJ;tr|Q5N726|Q5N726_ORYSJ;sp|Q10A30|ALFC2_ORYSJ;tr|Q6YPF1|Q6YPF1_ORYSJ;sp|Q5N725|ALFC3_ORYSJ;tr|Q69V57|Q69V57_ORYSJ	32;32;32;32;32;32	sp|P17784|ALFC1_ORYSJ;sp|Q5N725|ALFC3_ORYSJ;tr|Q69V57|Q69V57_ORYSJ	tr|Q69V57|Q69V57_ORYSJ	>sp|P17784|ALFC1_ORYSJ Fructose-bisphosphate aldolase 1, cytoplasmic OS=Oryza sativa subsp. japonica OX=39947 GN=FBA1 PE=1 SV=2;>tr|Q5N726|Q5N726_ORYSJ Fructose-bisphosphate aldolase OS=Oryza sativa subsp. japonica OX=39947 GN=Os01g0905800 PE=3 SV=1;>sp|Q1	0.828973	1.46e-11	157.45	1	S	AYIGTPGKGILAADESTGTIGKRFASINVEN;KYIATPGKGILAADESTGTIGKRLASINVEN	X;X;X;X;Phospho (STY);X;X;X;X;X;X;X;X;X;X;Phospho (STY);X;X;X;X;X;X;X;X;X;Phospho (STY);X;X;X;X;X	XXXXXXXXPPPPPPPPPPPPPPXXXXXXXXX	GILAADES(0.829)T(0.169)GT(0.002)IGK	8	2	-0.95482			6716	6716	6832.4	6353.6	5811.2	6031.1	6488.6	6592.2	5825.8	6625.1	6704.1
sp|P17784|ALFC1_ORYSJ	266	sp|P17784|ALFC1_ORYSJ	sp|P17784|ALFC1_ORYSJ	>sp|P17784|ALFC1_ORYSJ Fructose-bisphosphate aldolase 1, cytoplasmic OS=Oryza sativa subsp. japonica OX=39947 GN=FBA1 PE=1 SV=2	0.49544	3.69e-16	80.693		S	LQRTVPAAVPAIVFLSGGQSEEEATLNLNAM	X;X;X;X;X;X;X;X;X;X;X;X;X;X;X;Phospho (STY);X;X;X;X;X;X;X;X;X;X;X;X;X;X;X	XXXPPPPPPPPPPPPPPPPPPPPPPPPPPPP	TVPAAVPAIVFLS(0.495)GGQS(0.495)EEEAT(0.009)LNLNAMNK	13	4	-0.29036				17622	0	0	0	0	0	0	0	0	0
sp|P17784|ALFC1_ORYSJ	270	sp|P17784|ALFC1_ORYSJ	sp|P17784|ALFC1_ORYSJ	>sp|P17784|ALFC1_ORYSJ Fructose-bisphosphate aldolase 1, cytoplasmic OS=Oryza sativa subsp. japonica OX=39947 GN=FBA1 PE=1 SV=2	0.49544	3.69e-16	80.693		S	VPAAVPAIVFLSGGQSEEEATLNLNAMNKLS	X;X;X;X;X;X;X;X;X;X;X;X;X;X;X;X;X;X;X;X;X;X;X;X;X;X;X;X;X;X;X	XXXXXXXXXXXXXXXXXXXXXXXXXXXXXXX	TVPAAVPAIVFLS(0.495)GGQS(0.495)EEEAT(0.009)LNLNAMNK	17	4	-0.29036				17622	0	0	0	0	0	0	0	0	0
tr|Q2QTJ7|Q2QTJ7_ORYSJ;tr|Q2QTJ1|Q2QTJ1_ORYSJ;sp|Q0INY7|RBS1_ORYSJ;sp|P18566|RBS2_ORYSJ	104;104;104;104	tr|Q2QTJ7|Q2QTJ7_ORYSJ	tr|Q2QTJ7|Q2QTJ7_ORYSJ	>tr|Q2QTJ7|Q2QTJ7_ORYSJ Ribulose bisphosphate carboxylase small chain OS=Oryza sativa subsp. japonica OX=39947 GN=LOC_Os12g19394 PE=2 SV=1;>tr|Q2QTJ1|Q2QTJ1_ORYSJ Ribulose bisphosphate carboxylase small chain OS=Oryza sativa subsp. japonica OX=39947 GN=LOC	0.999701	0.000131508	49.048	1	S	LEFSKVGFVYRENHRSPGYYDGRYWTMWKLP	X;X;X;X;X;X;X;X;X;X;X;X;X;X;X;Phospho (STY);X;X;X;X;X;X;X;X;X;X;X;X;X;X;X	XXXXXXXXXXXPPPPPPPPPPPPXXXXXXXX	ENHRS(1)PGYYDGR	5	3	-0.064054			4650;4651;4652	4650	9601	9333.3	9578.5	13442	12522	13906	9351.6	10590	10060
sp|P29620|CDKD1_ORYSJ;tr|A0A0P0WLZ1|A0A0P0WLZ1_ORYSJ	338;61	sp|P29620|CDKD1_ORYSJ	sp|P29620|CDKD1_ORYSJ	>sp|P29620|CDKD1_ORYSJ Cyclin-dependent kinase D-1 OS=Oryza sativa subsp. japonica OX=39947 GN=CDKD-1 PE=1 SV=1;>tr|A0A0P0WLZ1|A0A0P0WLZ1_ORYSJ Os05g0392300 protein (Fragment) OS=Oryza sativa subsp. japonica OX=39947 GN=Os05g0392300 PE=4 SV=1	1	1.93e-28	96.837	1	S	NKIPDLNLQDGPVVLSPPRKLRRVTAHEGME	X;X;X;X;X;X;X;X;X;X;X;X;X;X;X;Phospho (STY);X;X;X;X;X;X;X;X;X;X;X;X;X;X;X	PPPPPPPPPPPPPPPPPPPXXXXXXXXXXXX	IPDLNLQDGPVVLS(1)PPR	14	3	1.0956			6120;8558;8559;8560;8561	8560	5455.5	6124.6	5653.1	5817.5	6252.6	5593.5	6196.8	6125.7	6732.4
sp|P29620|CDKD1_ORYSJ	168	sp|P29620|CDKD1_ORYSJ	sp|P29620|CDKD1_ORYSJ	>sp|P29620|CDKD1_ORYSJ Cyclin-dependent kinase D-1 OS=Oryza sativa subsp. japonica OX=39947 GN=CDKD-1 PE=1 SV=1	1	1.68e-12	110.87	2	S	GQLKLADFGLARIFGSPERNFTHQVFARWYR	X;X;X;X;X;X;X;X;X;X;X;X;X;X;X;Phospho (STY);X;X;X;X;X;Phospho (STY);X;X;X;X;X;X;X;X;X	XXXXXXXXXXXXPPPPPPPPPPPPPPPPXXX	IFGS(1)PERNFT(1)HQVFAR	4	3	-0.097154			8167;8168;8169;8170	8170	36848	36670	35260	38438	37088	39714	34510	37035	38252
sp|P30298|SUS2_ORYSJ	10	sp|P30298|SUS2_ORYSJ	sp|P30298|SUS2_ORYSJ	>sp|P30298|SUS2_ORYSJ Sucrose synthase 2 OS=Oryza sativa subsp. japonica OX=39947 GN=SUS2 PE=1 SV=2	1	0.00345001	50.999	1	S	______MAAKLARLHSLRERLGATFSSHPNE	X;X;X;X;X;X;X;X;X;X;X;X;X;X;X;Phospho (STY);X;X;X;X;X;X;X;X;X;X;X;X;X;X;X	XXXXXXXXXXXXXPPPPPPPXXXXXXXXXXX	LHS(1)LRER	3	2	0.063413			10212;10213;10214;10215;10216;10217;10218	10218	26264	24546	24916	21674	21420	21627	29206	27355	27711
tr|Q851P5|Q851P5_ORYSJ;sp|P31674|RS15_ORYSJ	38;38	tr|Q851P5|Q851P5_ORYSJ	tr|Q851P5|Q851P5_ORYSJ	>tr|Q851P5|Q851P5_ORYSJ 40S ribosomal protein S15, putative, expressed OS=Oryza sativa subsp. japonica OX=39947 GN=LOC_Os03g58430 PE=2 SV=1;>sp|P31674|RS15_ORYSJ 40S ribosomal protein S15 OS=Oryza sativa subsp. japonica OX=39947 GN=RPS15 PE=2 SV=2	0.5	0.000146743	38.938	1	S	KYSYRGVDLDALLDMSTDDLVQLFPARARRR	X;X;X;X;X;X;X;X;X;X;X;X;X;X;Oxidation (M);Phospho (STY);X;X;X;X;X;X;X;X;X;X;X;X;X;X;X	XXXXXPPPPPPPPPPPPPPPPPPPPPPXXXX	GVDLDALLDMS(0.5)T(0.5)DDLVQLFPAR	11	3	-0.70675			7534	7534	165.64	170.34	189.92	207.57	96.518	0	143.54	136.51	259.41
sp|P31924|SUS1_ORYSJ	15	sp|P31924|SUS1_ORYSJ	sp|P31924|SUS1_ORYSJ	>sp|P31924|SUS1_ORYSJ Sucrose synthase 1 OS=Oryza sativa subsp. japonica OX=39947 GN=SUS1 PE=1 SV=1	1	0.00191869	21.573	1;2	S	_MGEAAGDRVLSRLHSVRERIGDSLSAHPNE	X;X;X;X;X;X;X;X;X;X;X;Phospho (STY);X;X;X;Phospho (STY);X;X;X;X;X;X;X;X;X;X;X;X;X;X;X	XXXXXXXXXPPPPPPPPPPPXXXXXXXXXXX	VLS(1)RLHS(1)VR	7	3	-0.084891			10219;10220;10221;10222;10223;18636;18637	18637	41702	41315	39607	33592	34194	35856	42316	43244	43204
sp|P31924|SUS1_ORYSJ	11	sp|P31924|SUS1_ORYSJ	sp|P31924|SUS1_ORYSJ	>sp|P31924|SUS1_ORYSJ Sucrose synthase 1 OS=Oryza sativa subsp. japonica OX=39947 GN=SUS1 PE=1 SV=1	1	0.00191869	48.412	2	S	_____MGEAAGDRVLSRLHSVRERIGDSLSA	X;X;X;X;X;X;X;X;X;X;X;X;X;X;X;Phospho (STY);X;X;X;Phospho (STY);X;X;X;X;X;X;X;X;X;X;X	XXXXXXXXXXXXXPPPPPPPPPXXXXXXXXX	VLS(1)RLHS(1)VR	3	3	-0.084891			18636;18637	18637	11993	11984	10973	9354	9486.7	9889	12240	12862	12417
sp|P41095|RLA0_ORYSJ;tr|Q2RAW0|Q2RAW0_ORYSJ;tr|Q2QY46|Q2QY46_ORYSJ;tr|A0A0P0XBD7|A0A0P0XBD7_ORYSJ	309;310;310;89	sp|P41095|RLA0_ORYSJ	sp|P41095|RLA0_ORYSJ	>sp|P41095|RLA0_ORYSJ 60S acidic ribosomal protein P0 OS=Oryza sativa subsp. japonica OX=39947 GN=Os08g0130500 PE=1 SV=3;>tr|Q2RAW0|Q2RAW0_ORYSJ 60S acidic ribosomal protein P0 OS=Oryza sativa subsp. japonica OX=39947 GN=LOC_Os11g04070 PE=3 SV=1;>tr|Q2QY46	0.999991	1.13e-15	108.17	1	S	SAAKEEEKKEEPEEESDGDLGMSLFD_____	X;X;X;X;X;X;X;X;X;X;X;X;X;X;X;Phospho (STY);X;X;X;X;X;Oxidation (M);X;X;X;X;X;X;X;X;X	XXXXXXXXPPPPPPPPPPPPPPPPPPXXXXX	KEEPEEES(1)DGDLGMSLFD	8	3	-0.24688			9091;9092;9093;9094;9095;9096;9097;9098	9095	14452	62741	15342	28841	14065	15912	14657	14546	36037
sp|P50156|TIP11_ORYSJ	10	sp|P50156|TIP11_ORYSJ	sp|P50156|TIP11_ORYSJ	>sp|P50156|TIP11_ORYSJ Probable aquaporin TIP1-1 OS=Oryza sativa subsp. japonica OX=39947 GN=TIP1-1 PE=2 SV=1	0.999949	1.52e-13	97.158	1	S	______MPIRNIAVGSHQEVYHPGALKAALA	X;X;X;X;X;X;X;X;X;X;X;X;X;X;X;Phospho (STY);X;X;X;X;X;X;X;X;X;X;X;X;X;X;X	XXXXXXXXXXPPPPPPPPPPPPPPPPPXXXX	NIAVGS(1)HQEVYHPGALK	6	4	-0.078863			12141;12142;12143	12141	20327	19888	19570	20844	19385	20972	21333	23194	22644
sp|P53683|CDPKJ_ORYSJ	249	sp|P53683|CDPKJ_ORYSJ	sp|P53683|CDPKJ_ORYSJ	>sp|P53683|CDPKJ_ORYSJ Calcium-dependent protein kinase 19 OS=Oryza sativa subsp. japonica OX=39947 GN=CPK19 PE=2 SV=2	0.968476	1.58e-06	59.638	1	S	SVFIEEGKMYRDIVGSAYYVAPEVLRRNYGK	X;X;X;X;X;X;X;X;X;X;X;X;X;X;X;Phospho (STY);X;X;X;X;X;X;X;X;X;X;X;X;X;X;X	XXXXXXXXXXXPPPPPPPPPPPPPPPXXXXX	DIVGS(0.968)AY(0.03)Y(0.002)VAPEVLR	5	3	-0.27011			2988;2989;2990	2990	2340.7	2521.1	2369.6	2939.9	3140.5	3046.1	2397.7	2644	2781.6
sp|P55142|GRXC6_ORYSJ	49	sp|P55142|GRXC6_ORYSJ	sp|P55142|GRXC6_ORYSJ	>sp|P55142|GRXC6_ORYSJ Glutaredoxin-C6 OS=Oryza sativa subsp. japonica OX=39947 GN=GRXC6 PE=1 SV=2	0.93565	4.95e-10	71.184	1	S	EQLGATFKAIELDGESDGSELQSALAEWTGQ	X;X;X;X;X;X;X;X;X;X;X;X;X;X;X;Phospho (STY);X;X;X;X;X;X;X;X;X;X;X;X;X;X;X	XXXXXXXXPPPPPPPPPPPPPPPPPPPPPPP	AIELDGES(0.936)DGS(0.064)ELQSALAEWTGQR	8	3	-0.92719			930;931;932	931	955.82	900.58	761.31	617.95	767.6	1012.3	913.54	954.88	477.42
sp|P56724|RLA3_ORYSJ;tr|Q5NB69|Q5NB69_ORYSJ	109;109	sp|P56724|RLA3_ORYSJ;tr|Q5NB69|Q5NB69_ORYSJ	tr|Q5NB69|Q5NB69_ORYSJ	>sp|P56724|RLA3_ORYSJ 60S acidic ribosomal protein P3 OS=Oryza sativa subsp. japonica OX=39947 GN=Os06g0701400 PE=3 SV=3;>tr|Q5NB69|Q5NB69_ORYSJ Os01g0231700 protein OS=Oryza sativa subsp. japonica OX=39947 GN=Os01g0231700 PE=2 SV=1	0.999953	2.5e-15	104.99	1	S	EAPKAEEKKEEEKEESEDDLGFSLFD_____	X;X;X;X;X;X;X;X;X;X;X;X;X;X;X;Phospho (STY);X;X;X;X;X;X;X;X;X;X;X;X;X;X;X	XXXXXXXXPPPPPPPPPPPPPPPPPPXXXXX	EEEKEES(1)EDDLGFSLFD	7	3	2.5389			3853;9075;9076;9077;9078;9079;9080;9081;9082;9083;9084;9085;9086;9087;9088;9089;9090	3853	112470	112730	110000	130590	123930	133480	101330	102830	107860
sp|P93431|RCA_ORYSJ;tr|A0A0P0Y677|A0A0P0Y677_ORYSJ;tr|A0A0P0Y5U3|A0A0P0Y5U3_ORYSJ	70;18;70	sp|P93431|RCA_ORYSJ;tr|A0A0P0Y677|A0A0P0Y677_ORYSJ	sp|P93431|RCA_ORYSJ	>sp|P93431|RCA_ORYSJ Ribulose bisphosphate carboxylase/oxygenase activase, chloroplastic OS=Oryza sativa subsp. japonica OX=39947 GN=RCA PE=1 SV=2;>tr|A0A0P0Y677|A0A0P0Y677_ORYSJ Os11g0707000 protein (Fragment) OS=Oryza sativa subsp. japonica OX=39947 GN=O	0.99994	3.59e-12	93.836	1	S	KQTDQDRWKGLAYDISDDQQDITRGKGFVDS	X;X;X;X;X;X;X;X;X;X;X;X;X;X;X;Phospho (STY);X;X;X;X;X;X;X;X;X;X;X;X;X;X;X	XXXXXXXXXPPPPPPPPPPPPPPPXXXXXXX	GLAYDIS(1)DDQQDITR	7	3	-1.0293			6883;6884;6885;6886;6887;6888	6885	23842	22604	22372	36056	33360	35910	24064	23098	24072
sp|P93431|RCA_ORYSJ;tr|A0A0P0Y677|A0A0P0Y677_ORYSJ	163;111	sp|P93431|RCA_ORYSJ;tr|A0A0P0Y677|A0A0P0Y677_ORYSJ	sp|P93431|RCA_ORYSJ	>sp|P93431|RCA_ORYSJ Ribulose bisphosphate carboxylase/oxygenase activase, chloroplastic OS=Oryza sativa subsp. japonica OX=39947 GN=RCA PE=1 SV=2;>tr|A0A0P0Y677|A0A0P0Y677_ORYSJ Os11g0707000 protein (Fragment) OS=Oryza sativa subsp. japonica OX=39947 GN=O	1	2.28e-07	70.708	1	S	VPLILGIWGGKGQGKSFQCELVFAKMGINPI	X;X;X;X;X;X;X;X;X;X;X;X;X;X;X;Phospho (STY);X;X;X;X;X;X;X;X;X;Oxidation (M);X;X;X;X;X	XXXXXXXXXXXPPPPPPPPPPPPPPXXXXXX	S(1)FQCELVFAK	1	3	1.7258			7214;7215;14554;14555	14555	19208	18709	18585	19540	17947	20205	19483	19129	18953
sp|P93431|RCA_ORYSJ;tr|A0A0P0Y677|A0A0P0Y677_ORYSJ	332;280	sp|P93431|RCA_ORYSJ;tr|A0A0P0Y677|A0A0P0Y677_ORYSJ	sp|P93431|RCA_ORYSJ	>sp|P93431|RCA_ORYSJ Ribulose bisphosphate carboxylase/oxygenase activase, chloroplastic OS=Oryza sativa subsp. japonica OX=39947 GN=RCA PE=1 SV=2;>tr|A0A0P0Y677|A0A0P0Y677_ORYSJ Os11g0707000 protein (Fragment) OS=Oryza sativa subsp. japonica OX=39947 GN=O	0.999933	2.63e-07	61.292	1	S	PDEDIVKIVDSFPGQSIDFFGALRARVYDDE	X;X;X;X;X;X;X;X;X;X;X;X;X;X;X;Phospho (STY);X;X;X;X;X;X;X;X;X;X;X;X;X;X;X	XXXXXXXPPPPPPPPPPPPPPPPPXXXXXXX	IVDSFPGQS(1)IDFFGALR	9	3	0.086542			8792;8793;8794;8795;8796	8796	2353.6	2089.3	2286.3	1899.1	2070.5	2014.2	1792.8	1849.1	1884.4
sp|P93431|RCA_ORYSJ;tr|A0A0P0Y677|A0A0P0Y677_ORYSJ	181;129	sp|P93431|RCA_ORYSJ;tr|A0A0P0Y677|A0A0P0Y677_ORYSJ	sp|P93431|RCA_ORYSJ	>sp|P93431|RCA_ORYSJ Ribulose bisphosphate carboxylase/oxygenase activase, chloroplastic OS=Oryza sativa subsp. japonica OX=39947 GN=RCA PE=1 SV=2;>tr|A0A0P0Y677|A0A0P0Y677_ORYSJ Os11g0707000 protein (Fragment) OS=Oryza sativa subsp. japonica OX=39947 GN=O	0.994373	1.09e-09	68.479	1	S	CELVFAKMGINPIMMSAGELESGNAGEPAKL	X;X;X;X;X;X;X;X;X;X;X;X;X;X;X;Phospho (STY);X;X;X;X;X;X;X;X;X;X;X;X;X;X;X	XXXXXXXPPPPPPPPPPPPPPPPPPPPPPPX	MGINPIMMS(0.994)AGELES(0.006)GNAGEPAK	9	3	-2.5563			11584;11585;11586	11585	4867.9	4387	4147.9	4636.7	4352.1	4592.9	4398.4	4432.5	4248.3
sp|P93431|RCA_ORYSJ;tr|A0A0P0Y677|A0A0P0Y677_ORYSJ	418;366	sp|P93431|RCA_ORYSJ;tr|A0A0P0Y677|A0A0P0Y677_ORYSJ	sp|P93431|RCA_ORYSJ	>sp|P93431|RCA_ORYSJ Ribulose bisphosphate carboxylase/oxygenase activase, chloroplastic OS=Oryza sativa subsp. japonica OX=39947 GN=RCA PE=1 SV=2;>tr|A0A0P0Y677|A0A0P0Y677_ORYSJ Os11g0707000 protein (Fragment) OS=Oryza sativa subsp. japonica OX=39947 GN=O	0.999985	1.61e-13	77.066	1	S	LAEQYLSEAALGDANSDAMKTGSFYGQGAQQ;LAEQYLSEAALGDANSDAMKTGSFYGSAPSS	X;X;X;X;X;X;X;X;X;X;X;X;X;X;X;Phospho (STY);X;X;X;X;X;X;X;X;X;X;Phospho (STY);X;X;Phospho (STY);X	PPPPPPPPPPPPPPPPPPPPXXXXXXXXXXX	VQLAEQYLSEAALGDANS(1)DAMK	18	3	0.71309			18849;18850	18850	2333.8	2376.3	2350.6	3460.2	3024.2	3601.4	2020.3	1838	2201.1
sp|Q06967|14336_ORYSJ	2	sp|Q06967|14336_ORYSJ	sp|Q06967|14336_ORYSJ	>sp|Q06967|14336_ORYSJ 14-3-3-like protein GF14-F OS=Oryza sativa subsp. japonica OX=39947 GN=GF14F PE=1 SV=2	0.999988	9.41e-14	69.399	1	S	______________MSPAEASREENVYMAKL	X;X;X;X;X;X;X;X;X;X;X;X;X;X;Oxidation (M);Phospho (STY);X;X;X;X;X;X;X;X;X;X;X;X;X;X;X	XXXXXXXXXXXXXXPPPPPPPPPPPPPPPPX	MS(1)PAEASR	2	2	0.14109			11801;11802;11803;11804;11805;11806;11807;11808;11809;11810;11811;11812;11813;11814	11802	122190	120870	112300	115240	117950	117790	120290	121410	125830
sp|Q0D3J9|C3H53_ORYSJ	484	sp|Q0D3J9|C3H53_ORYSJ	sp|Q0D3J9|C3H53_ORYSJ	>sp|Q0D3J9|C3H53_ORYSJ Zinc finger CCCH domain-containing protein 53 OS=Oryza sativa subsp. japonica OX=39947 GN=Os07g0682400 PE=2 SV=1	0.5	3.69e-12	13.574	1	S	DPFDMHQLGARMLQHSNSANEMLLRRKLEEQ	X;X;X;X;X;X;X;X;X;X;X;X;X;X;X;Phospho (STY);X;X;X;X;X;X;X;X;X;X;X;X;X;X;X	XXXXXXXXXXXPPPPPPPPPPPPPPXXXXXX	MLQHS(0.5)NS(0.5)ANEMLLR	5	3	-2.0203			11689	11689	8594.6	8030.4	7609.3	7873.8	7359.2	7665.3	8046.1	9190.8	8941.1
sp|Q0D3J9|C3H53_ORYSJ	486	sp|Q0D3J9|C3H53_ORYSJ	sp|Q0D3J9|C3H53_ORYSJ	>sp|Q0D3J9|C3H53_ORYSJ Zinc finger CCCH domain-containing protein 53 OS=Oryza sativa subsp. japonica OX=39947 GN=Os07g0682400 PE=2 SV=1	0.890487	3.69e-12	13.574	1	S	FDMHQLGARMLQHSNSANEMLLRRKLEEQQQ	X;X;X;X;X;X;X;X;X;X;X;X;X;X;X;Phospho (STY);X;X;X;X;X;X;X;X;X;X;X;X;X;X;X	XXXXXXXXXPPPPPPPPPPPPPPXXXXXXXX	MLQHS(0.11)NS(0.89)ANEMLLR	7	3	-1.3537			11689;11690	11690	15996	15318	15067	15007	14073	15123	15258	16708	17390
sp|Q0D519|FH13_ORYSJ	192	sp|Q0D519|FH13_ORYSJ	sp|Q0D519|FH13_ORYSJ	>sp|Q0D519|FH13_ORYSJ Formin-like protein 13 OS=Oryza sativa subsp. japonica OX=39947 GN=FH13 PE=2 SV=1	1	0.00113174	34.107	1	S	EKSPDLRPLPLLKQPSPDLRPLPPLKRPESQ	X;X;X;X;X;X;X;X;X;X;X;X;X;X;X;Phospho (STY);X;X;X;X;X;X;X;X;X;X;X;X;X;X;X	XXXXXXXXXXXXXPPPPPPPPPPPPPXXXXX	QPS(1)PDLRPLPPLK	3	3	-0.26638			13082;13083;13084	13084	27490	28197	29719	34236	29427	31747	29390	29807	30408
sp|Q0D519|FH13_ORYSJ	140	sp|Q0D519|FH13_ORYSJ	sp|Q0D519|FH13_ORYSJ	>sp|Q0D519|FH13_ORYSJ Formin-like protein 13 OS=Oryza sativa subsp. japonica OX=39947 GN=FH13 PE=2 SV=1	0.990116	0.0104977	34.977	1	S	KRAVGAAAAVAARVPSDVGSSSRQHRSPPPS	X;X;X;X;X;X;X;X;X;X;X;X;X;X;X;Phospho (STY);X;X;X;X;X;X;X;X;X;X;X;X;X;X;X	XXXXXXXXXXXXXPPPPPPPPPPXXXXXXXX	VPS(0.99)DVGS(0.008)S(0.001)S(0.001)R	3	2	-1.8021			18796;18797;18798	18797	29989	29941	28556	32624	30915	33050	30257	30732	32543
sp|Q0D5P8|PSBQ_ORYSJ	207	sp|Q0D5P8|PSBQ_ORYSJ	sp|Q0D5P8|PSBQ_ORYSJ	>sp|Q0D5P8|PSBQ_ORYSJ Oxygen-evolving enhancer protein 3, chloroplastic OS=Oryza sativa subsp. japonica OX=39947 GN=Os07g0544800 PE=2 SV=1	1	0.00181225	12.953	1	S	IKSPEEAEKYYTLTKSALGDVLAKLG_____	X;X;X;X;X;X;X;X;X;X;X;X;X;X;X;Phospho (STY);X;X;X;X;X;X;X;X;X;X;X;X;X;X;X	XXXXXXXXXXXXXXXPPPPPPPPPXXXXXXX	S(1)ALGDVLAK	1	3	-0.46806			14070	14070	1477.3	1255.1	1204	1274.1	1365.9	1437.3	1049	1192.8	967.07
sp|Q0D840|TRXH1_ORYSJ	121	sp|Q0D840|TRXH1_ORYSJ	sp|Q0D840|TRXH1_ORYSJ	>sp|Q0D840|TRXH1_ORYSJ Thioredoxin H1 OS=Oryza sativa subsp. japonica OX=39947 GN=TRXH PE=1 SV=1	0.999492	3.15e-05	117.11	1	S	QNTIVKHVGATAASASA______________	X;X;X;X;X;X;X;X;X;X;X;X;X;X;X;Phospho (STY);X;X;X;X;X;X;X;X;X;X;X;X;X;X;X	XXXXXXPPPPPPPPPPPXXXXXXXXXXXXXX	HVGATAAS(0.001)AS(0.999)A	10	2	0.1276			7932;7933;7934	7932	23685	23048	21392	24093	24174	25561	24992	25315	26178
sp|Q0D8I9|EIN2_ORYSJ;tr|A0A0P0X2N3|A0A0P0X2N3_ORYSJ	958;280	sp|Q0D8I9|EIN2_ORYSJ	sp|Q0D8I9|EIN2_ORYSJ	>sp|Q0D8I9|EIN2_ORYSJ Protein ETHYLENE-INSENSITIVE 2 OS=Oryza sativa subsp. japonica OX=39947 GN=EIN2 PE=2 SV=1;>tr|A0A0P0X2N3|A0A0P0X2N3_ORYSJ Os07g0156732 protein (Fragment) OS=Oryza sativa subsp. japonica OX=39947 GN=Os07g0156732 PE=3 SV=1	0.916993	0.00176918	39.819	1	S	LLNESKLGGGTIGSQSYLSRLASERSQYTNS	X;X;X;X;X;X;X;X;X;X;X;X;X;X;X;Phospho (STY);X;X;X;X;X;X;X;X;X;X;X;X;X;X;X	XXXXXXPPPPPPPPPPPPPPXXXXXXXXXXX	LGGGTIGS(0.032)QS(0.917)Y(0.001)LS(0.05)R	10	2	3.1951			10112	10112	5858.1	5563.8	5209.1	5434.1	5030.2	5975.9	6365.7	6748	6680.2
sp|Q0D8I9|EIN2_ORYSJ	517	sp|Q0D8I9|EIN2_ORYSJ	sp|Q0D8I9|EIN2_ORYSJ	>sp|Q0D8I9|EIN2_ORYSJ Protein ETHYLENE-INSENSITIVE 2 OS=Oryza sativa subsp. japonica OX=39947 GN=EIN2 PE=2 SV=1	0.999696	0.027192	20.025	1	S	GNVTYEEDQRSDVVPSPRIQPVDCLKSALDY	X;X;X;X;X;X;X;X;X;X;X;X;X;X;X;Phospho (STY);X;X;X;X;X;X;X;X;X;X;X;X;X;X;X	XXXXXXXXXXPPPPPPPPXXXXXXXXXXXXX	SDVVPS(1)PR	6	2	-0.21249			14405	14405	23906	22251	22988	19467	19813	19716	23495	24105	24357
tr|Q0IVN4|Q0IVN4_ORYSJ;tr|Q6K1W7|Q6K1W7_ORYSJ;tr|Q651X1|Q651X1_ORYSJ;tr|Q6Z5K6|Q6Z5K6_ORYSJ;sp|Q0DCT8|G11A_ORYSJ;tr|Q6Z8V4|Q6Z8V4_ORYSJ;tr|Q0DZ14|Q0DZ14_ORYSJ;tr|Q0JBA2|Q0JBA2_ORYSJ	245;414;426;429;430;438;526;534	tr|Q0IVN4|Q0IVN4_ORYSJ	tr|Q0IVN4|Q0IVN4_ORYSJ	>tr|Q0IVN4|Q0IVN4_ORYSJ Os10g0562500 protein (Fragment) OS=Oryza sativa subsp. japonica OX=39947 GN=Os10g0562500 PE=4 SV=1;>tr|Q6K1W7|Q6K1W7_ORYSJ Os09g0258500 protein OS=Oryza sativa subsp. japonica OX=39947 GN=Os09g0258500 PE=4 SV=1;>tr|Q651X1|Q651X1_ORY	0.498251	4.06e-13	96.304		S	AAALPEVVVEPTGARSMSFVGTHEYLAPEII	X;X;X;X;X;X;X;X;X;X;X;X;X;X;X;Phospho (STY);X;X;X;X;X;X;X;X;X;X;X;X;X;X;X	XXXXXXXXXXXXXXXPPPPPPPPPPPPPPPP	S(0.498)MS(0.498)FVGT(0.003)HEYLAPEIIK	1	3	0.86847				15301	0	0	0	0	0	0	0	0	0
tr|Q0IVN4|Q0IVN4_ORYSJ;tr|Q6K1W7|Q6K1W7_ORYSJ;tr|Q651X1|Q651X1_ORYSJ;tr|Q6Z5K6|Q6Z5K6_ORYSJ;sp|Q0DCT8|G11A_ORYSJ;tr|Q6Z8V4|Q6Z8V4_ORYSJ;tr|Q0DZ14|Q0DZ14_ORYSJ;tr|Q0JBA2|Q0JBA2_ORYSJ	247;416;428;431;432;440;528;536	tr|Q0IVN4|Q0IVN4_ORYSJ	tr|Q0IVN4|Q0IVN4_ORYSJ	>tr|Q0IVN4|Q0IVN4_ORYSJ Os10g0562500 protein (Fragment) OS=Oryza sativa subsp. japonica OX=39947 GN=Os10g0562500 PE=4 SV=1;>tr|Q6K1W7|Q6K1W7_ORYSJ Os09g0258500 protein OS=Oryza sativa subsp. japonica OX=39947 GN=Os09g0258500 PE=4 SV=1;>tr|Q651X1|Q651X1_ORY	0.82024	1.47e-18	130.77	1	S	ALPEVVVEPTGARSMSFVGTHEYLAPEIIKG	X;X;X;X;X;X;X;X;X;X;X;X;X;X;X;Phospho (STY);X;X;X;X;X;X;X;X;X;X;X;X;X;X;X	XXXXXXXXXXXXXPPPPPPPPPPPPPPPPPX	S(0.179)MS(0.82)FVGT(0.001)HEYLAPEIIK	3	3	1.3583			15300;15302	15302	6602.3	6474.1	6063.8	5826.7	5570.9	6363.5	6601	7221.7	6946.7
sp|Q0DFC9|PLAS_ORYSJ	105	sp|Q0DFC9|PLAS_ORYSJ	sp|Q0DFC9|PLAS_ORYSJ	>sp|Q0DFC9|PLAS_ORYSJ Plastocyanin, chloroplastic OS=Oryza sativa subsp. japonica OX=39947 GN=PETE PE=1 SV=1	0.971125	7.06e-05	41.013	1	S	AGFPHNVVFDEDAVPSGVDVSKISQEEYLNA	X;X;X;X;X;X;X;X;X;X;X;X;X;X;X;Phospho (STY);X;X;X;X;X;X;X;X;X;X;X;X;X;X;X	PPPPPPPPPPPPPPPPPPPPPPXXXXXXXXX	NNAGFPHNVVFDEDAVPS(0.971)GVDVS(0.029)K	18	3	-1.9793			12352	12352	3109.7	2795.8	3007.9	2915.7	2562.3	2685.9	2780.2	2286	2531
sp|Q0DG05|PSAH_ORYSJ	73	sp|Q0DG05|PSAH_ORYSJ	sp|Q0DG05|PSAH_ORYSJ	>sp|Q0DG05|PSAH_ORYSJ Photosystem I reaction center subunit VI, chloroplastic OS=Oryza sativa subsp. japonica OX=39947 GN=PSAH PE=2 SV=1	0.247464	1.03e-07	46.823		S	LEDIGNTTGQWDLYGSDAPSPYNPLQSKFFE	X;X;X;X;X;X;X;X;X;X;X;X;X;X;X;X;X;X;X;X;X;X;X;X;X;X;X;X;X;X;X	XXXXXXXXXXXXXXXXXXXXXXXXXXXXXXX	SVYFDLEDIGNT(0.247)T(0.247)GQWDLY(0.224)GS(0.247)DAPS(0.025)PY(0.008)NPLQSK	21	4	-0.31457				16318	0	0	0	0	0	0	0	0	0
sp|Q0DG05|PSAH_ORYSJ	77	sp|Q0DG05|PSAH_ORYSJ	sp|Q0DG05|PSAH_ORYSJ	>sp|Q0DG05|PSAH_ORYSJ Photosystem I reaction center subunit VI, chloroplastic OS=Oryza sativa subsp. japonica OX=39947 GN=PSAH PE=2 SV=1	0.190915	6.78e-05	41.731		S	GNTTGQWDLYGSDAPSPYNPLQSKFFETFAG	X;X;X;X;X;X;X;X;X;X;X;X;X;X;X;X;X;X;X;X;X;X;X;X;X;X;X;X;X;X;X	XXXXXXXXXXXXXXXXXXXXXXXXXXXXXXX	SVYFDLEDIGNT(0.191)T(0.191)GQWDLY(0.174)GS(0.191)DAPS(0.191)PY(0.062)NPLQSK	25	4	-0.24959				16319	0	0	0	0	0	0	0	0	0
tr|A0A0P0WQ42|A0A0P0WQ42_ORYSJ;sp|Q0DGG8|SAT5_ORYSJ	23;49	tr|A0A0P0WQ42|A0A0P0WQ42_ORYSJ	tr|A0A0P0WQ42|A0A0P0WQ42_ORYSJ	>tr|A0A0P0WQ42|A0A0P0WQ42_ORYSJ Serine O-acetyltransferase OS=Oryza sativa subsp. japonica OX=39947 GN=Os05g0533500 PE=3 SV=1;>sp|Q0DGG8|SAT5_ORYSJ Probable serine acetyltransferase 5 OS=Oryza sativa subsp. japonica OX=39947 GN=SAT5 PE=2 SV=2	0.725274	6.79e-08	54.541	1	S	AHEPDGGGASHRRPQSPPSLPAEVVPAFAPP	X;X;X;X;X;X;X;X;X;X;X;X;X;X;X;Phospho (STY);X;X;X;X;X;X;X;X;X;X;X;X;X;X;X	XXXXXXXXXXXXPPPPPPPPPPPPPPPPPPP	RPQS(0.725)PPS(0.274)LPAEVVPAFAPPESEDEESWVWSQIK	4	6	0.08521			13700;13701;13702	13700	2246.3	2224.1	2350.2	2153.3	2148.4	2342	2487.6	2215	2254.6
sp|Q0DJ33|GPA1_ORYSJ;tr|A0A0P0WKZ0|A0A0P0WKZ0_ORYSJ	110;120	sp|Q0DJ33|GPA1_ORYSJ	sp|Q0DJ33|GPA1_ORYSJ	>sp|Q0DJ33|GPA1_ORYSJ Guanine nucleotide-binding protein alpha-1 subunit OS=Oryza sativa subsp. japonica OX=39947 GN=GPA1 PE=1 SV=2;>tr|A0A0P0WKZ0|A0A0P0WKZ0_ORYSJ Os05g0333200 protein OS=Oryza sativa subsp. japonica OX=39947 GN=Os05g0333200 PE=3 SV=1	0.99997	4.86e-05	51.342	1	S	KELSQVESDSSKYVISPDNQEIGEKLSDIDG	X;X;X;X;X;X;X;X;X;X;X;X;X;X;X;Phospho (STY);X;X;X;X;X;X;X;X;X;X;X;X;X;X;X	XXXXXXXXXXXXPPPPPPPPPPPPPXXXXXX	YVIS(1)PDNQEIGEK	4	3	-0.45025			20154	20154	8545.5	7636.4	8516.6	7787.9	8321.5	8075.1	9028.2	7148.6	8749.1
sp|Q0DJA0|COPD1_ORYSJ	278	sp|Q0DJA0|COPD1_ORYSJ	sp|Q0DJA0|COPD1_ORYSJ	>sp|Q0DJA0|COPD1_ORYSJ Coatomer subunit delta-1 OS=Oryza sativa subsp. japonica OX=39947 GN=Os05g0310800 PE=2 SV=1	0.984627	1.5e-06	52.866	1	S	VILEDVQPSSVQSRASPLPPSDPVTVTIEEK	X;X;X;X;X;X;X;X;X;X;X;X;X;X;X;Phospho (STY);X;X;X;X;X;X;X;X;X;X;X;X;X;X;X	XXXXXXXXXXXXXXPPPPPPPPPPPPPPPPP	AS(0.985)PLPPS(0.015)DPVTVTIEEK	2	3	-1.4211			1805	1805	2415.3	2511.3	2225.4	2283.9	2531.2	2381.9	2420.4	2559.7	2524.8
tr|Q9LWN1|Q9LWN1_ORYSJ;sp|Q0DK10|RL11_ORYSJ;tr|A0A0P0WXQ4|A0A0P0WXQ4_ORYSJ	46;46;63	tr|Q9LWN1|Q9LWN1_ORYSJ	tr|Q9LWN1|Q9LWN1_ORYSJ	>tr|Q9LWN1|Q9LWN1_ORYSJ Os01g0205500 protein OS=Oryza sativa subsp. japonica OX=39947 GN=Os01g0205500 PE=2 SV=1;>sp|Q0DK10|RL11_ORYSJ 60S ribosomal protein L11 OS=Oryza sativa subsp. japonica OX=39947 GN=RPL11 PE=2 SV=1;>tr|A0A0P0WXQ4|A0A0P0WXQ4_ORYSJ Os06	0.998823	1.35e-06	64.934	1	S	RLTRASKVLEQLSGQSPVFSKARYTVRSFGI	X;X;X;X;X;X;X;X;X;X;X;X;X;X;X;Phospho (STY);X;X;X;X;X;X;X;X;X;X;X;X;X;X;X	XXXXXXXPPPPPPPPPPPPPPXXXXXXXXXX	VLEQLS(0.001)GQS(0.999)PVFS(0.001)K	9	3	-0.065122			18582	18582	3439.5	2991.8	3349.2	3066.7	2893.2	2961.1	3684.4	3442	3545.1
tr|A0A0P0W5N0|A0A0P0W5N0_ORYSJ;sp|Q0DM51|RH3_ORYSJ	403;728	tr|A0A0P0W5N0|A0A0P0W5N0_ORYSJ	tr|A0A0P0W5N0|A0A0P0W5N0_ORYSJ	>tr|A0A0P0W5N0|A0A0P0W5N0_ORYSJ RNA helicase (Fragment) OS=Oryza sativa subsp. japonica OX=39947 GN=Os03g0827700 PE=4 SV=1;>sp|Q0DM51|RH3_ORYSJ DEAD-box ATP-dependent RNA helicase 3, chloroplastic OS=Oryza sativa subsp. japonica OX=39947 GN=Os03g0827700 PE	0.99868	0.00591788	47.963	1	S	SYGSRSSSSFGGRSSSFGSRDSSRSFSGACF	X;X;X;X;X;X;X;X;X;X;X;X;X;X;X;Phospho (STY);X;X;X;X;X;X;X;X;X;X;X;X;X;X;X	XXXXXXXXXXXXXPPPPPPPXXXXXXXXXXX	SS(0.001)S(0.999)FGSR	3	2	-0.021422			15866;15867;15868	15866	21633	26894	21631	51936	48519	52581	22639	22902	23404
sp|Q0DRX6|CWZF3_ORYSJ	447	sp|Q0DRX6|CWZF3_ORYSJ	sp|Q0DRX6|CWZF3_ORYSJ	>sp|Q0DRX6|CWZF3_ORYSJ Cysteine-tryptophan domain-containing zinc finger protein 3 OS=Oryza sativa subsp. japonica OX=39947 GN=CWZF3 PE=1 SV=1	0.986739	1.94e-07	69.945	2	S	VSSSRRNKNSREAKGSPVESVSSSPLKNSNT	X;X;X;X;X;X;X;X;X;X;X;X;X;X;X;Phospho (STY);X;X;X;X;X;X;X;Phospho (STY);X;X;X;X;X;X;X	XXXXXXXXXXXPPPPPPPPPPPPPPPPXXXX	EAKGS(0.987)PVES(0.01)VS(0.016)S(0.204)S(0.784)PLK	5	3	1.6227			3690	3690	3224	3014.4	3029	4451.3	3769.5	4695.8	3963.9	3524	3670
sp|Q0DRX6|CWZF3_ORYSJ	451	sp|Q0DRX6|CWZF3_ORYSJ	sp|Q0DRX6|CWZF3_ORYSJ	>sp|Q0DRX6|CWZF3_ORYSJ Cysteine-tryptophan domain-containing zinc finger protein 3 OS=Oryza sativa subsp. japonica OX=39947 GN=CWZF3 PE=1 SV=1	0.92089	7.95e-10	89.878	2	S	RRNKNSREAKGSPVESVSSSPLKNSNTDKIS	X;X;X;X;X;X;X;X;X;X;X;X;X;X;X;Phospho (STY);X;X;Phospho (STY);X;X;X;X;X;X;X;X;X;X;X;X	XXXXXXXPPPPPPPPPPPPPPPPXXXXXXXX	EAKGS(0.002)PVES(0.921)VS(0.119)S(0.806)S(0.152)PLK	9	3	-0.3045			3691	3691	3661.9	3622.7	3419.2	4408	4637.7	4865.6	3621.2	4068.6	3566.2
sp|Q0DRX6|CWZF3_ORYSJ	454	sp|Q0DRX6|CWZF3_ORYSJ	sp|Q0DRX6|CWZF3_ORYSJ	>sp|Q0DRX6|CWZF3_ORYSJ Cysteine-tryptophan domain-containing zinc finger protein 3 OS=Oryza sativa subsp. japonica OX=39947 GN=CWZF3 PE=1 SV=1	0.806473	7.95e-10	89.878	2	S	KNSREAKGSPVESVSSSPLKNSNTDKISKAR	X;X;X;X;X;X;X;X;X;X;X;X;Phospho (STY);X;X;Phospho (STY);X;X;X;X;X;X;X;X;X;X;X;X;X;X;X	XXXXPPPPPPPPPPPPPPPPXXXXXXXXXXX	EAKGS(0.002)PVES(0.921)VS(0.119)S(0.806)S(0.152)PLK	12	3	-0.3045			3691	3691	3661.9	3622.7	3419.2	4408	4637.7	4865.6	3621.2	4068.6	3566.2
sp|Q0DRX6|CWZF3_ORYSJ	455	sp|Q0DRX6|CWZF3_ORYSJ	sp|Q0DRX6|CWZF3_ORYSJ	>sp|Q0DRX6|CWZF3_ORYSJ Cysteine-tryptophan domain-containing zinc finger protein 3 OS=Oryza sativa subsp. japonica OX=39947 GN=CWZF3 PE=1 SV=1	0.783686	1.94e-07	69.945	2	S	NSREAKGSPVESVSSSPLKNSNTDKISKARK	X;X;X;X;X;X;X;Phospho (STY);X;X;X;X;X;X;X;Phospho (STY);X;X;X;X;X;X;X;X;X;X;X;X;X;X;X	XXXPPPPPPPPPPPPPPPPXXXXXXXXXXXX	EAKGS(0.987)PVES(0.01)VS(0.016)S(0.204)S(0.784)PLK	13	3	1.6227			3690	3690	3224	3014.4	3029	4451.3	3769.5	4695.8	3963.9	3524	3670
sp|Q0DYK7|CDPK5_ORYSJ	65	sp|Q0DYK7|CDPK5_ORYSJ	sp|Q0DYK7|CDPK5_ORYSJ	>sp|Q0DYK7|CDPK5_ORYSJ Calcium-dependent protein kinase 5 OS=Oryza sativa subsp. japonica OX=39947 GN=CPK5 PE=3 SV=1	0.999993	1.03e-06	62.152	1	S	APRGSAAAADAPHAASMKRGAPAPAELTANV	X;X;X;X;X;X;X;X;X;X;X;X;X;X;X;Phospho (STY);X;X;X;X;X;X;X;X;X;X;X;X;X;X;X	XXXPPPPPPPPPPPPPPPPXXXXXXXXXXXX	GSAAAADAPHAAS(1)MKR	13	4	1.3722			7324	7324	7001.9	6842.8	7262.5	5722.5	5042.7	6414.5	7405.3	8083.3	8094.4
sp|Q0DYK7|CDPK5_ORYSJ;sp|Q9FXQ3|CDPKD_ORYSJ	543;539	sp|Q0DYK7|CDPK5_ORYSJ	sp|Q0DYK7|CDPK5_ORYSJ	>sp|Q0DYK7|CDPK5_ORYSJ Calcium-dependent protein kinase 5 OS=Oryza sativa subsp. japonica OX=39947 GN=CPK5 PE=3 SV=1;>sp|Q9FXQ3|CDPKD_ORYSJ Calcium-dependent protein kinase 13 OS=Oryza sativa subsp. japonica OX=39947 GN=CPK13 PE=2 SV=1	0.99594	0.000147478	62.766	2	S	MTKGNMGVGRRTMRNSLNISMR_________	X;X;X;X;X;X;X;X;X;X;X;X;X;X;X;Phospho (STY);X;X;X;Phospho (STY);X;X;X;X;X;X;X;X;X;X;X	XXXXXXXXXXXPPPPPPPPPPPXXXXXXXXX	T(0.004)MRNS(0.996)LNIS(1)MR	5	3	0.57756			17154;17155;17156	17156	13899	13064	13344	12587	13554	13710	14004	14512	15620
sp|Q0DYK7|CDPK5_ORYSJ;sp|Q9FXQ3|CDPKD_ORYSJ	547;543	sp|Q0DYK7|CDPK5_ORYSJ	sp|Q0DYK7|CDPK5_ORYSJ	>sp|Q0DYK7|CDPK5_ORYSJ Calcium-dependent protein kinase 5 OS=Oryza sativa subsp. japonica OX=39947 GN=CPK5 PE=3 SV=1;>sp|Q9FXQ3|CDPKD_ORYSJ Calcium-dependent protein kinase 13 OS=Oryza sativa subsp. japonica OX=39947 GN=CPK13 PE=2 SV=1	1	0.000147478	64.63	1;2	S	NMGVGRRTMRNSLNISMR_____________	X;X;X;X;X;X;X;X;X;X;X;Phospho (STY);X;X;X;Phospho (STY);X;X;X;X;X;X;X;X;X;X;X;X;X;X;X	XXXXXXXPPPPPPPPPPPXXXXXXXXXXXXX	T(0.004)MRNS(0.996)LNIS(1)MR	9	3	0.57756			12485;12486;12487;12488;12489;12490;17154;17155;17156	17156	93922	88589	88633	87363	86830	90533	94643	98262	101200
sp|Q0E3C3|KNOS2_ORYSJ	312	sp|Q0E3C3|KNOS2_ORYSJ	sp|Q0E3C3|KNOS2_ORYSJ	>sp|Q0E3C3|KNOS2_ORYSJ Homeobox protein knotted-1-like 2 OS=Oryza sativa subsp. japonica OX=39947 GN=HOS58 PE=2 SV=2	1	2.3e-05	85.946	1	S	TKKKRNVTGDGGAEQSW______________	X;X;X;X;X;X;X;X;X;X;X;X;X;X;X;Phospho (STY);X;X;X;X;X;X;X;X;X;X;X;X;X;X;X	XXXXXPPPPPPPPPPPPXXXXXXXXXXXXXX	NVTGDGGAEQS(1)W	11	2	-0.17458			12586;12587	12586	8402.2	8674.8	6733.5	8798.5	8782.7	8580.5	7087.2	8060.6	8139.6
sp|Q0E4K1|CATA1_ORYSJ	10	sp|Q0E4K1|CATA1_ORYSJ	sp|Q0E4K1|CATA1_ORYSJ	>sp|Q0E4K1|CATA1_ORYSJ Catalase isozyme A OS=Oryza sativa subsp. japonica OX=39947 GN=CATA PE=1 SV=1	0.609198	0.000260071	68.951	1	S	______MDPCKFRPSSSFDTKTTTTNAGAPV	X;X;X;X;X;X;X;X;X;X;X;X;X;X;X;Phospho (STY);X;X;X;X;X;X;X;X;X;X;X;X;X;X;X	XXXXXXXXXXXPPPPPPPPPPXXXXXXXXXX	FRPS(0.021)S(0.609)S(0.361)FDT(0.008)K	5	2	0.15288			5723	5723	8510.9	8135	8504.6	11167	9276.5	10926	9528.7	9043.8	8774.3
sp|Q0E4K1|CATA1_ORYSJ	11	sp|Q0E4K1|CATA1_ORYSJ	sp|Q0E4K1|CATA1_ORYSJ	>sp|Q0E4K1|CATA1_ORYSJ Catalase isozyme A OS=Oryza sativa subsp. japonica OX=39947 GN=CATA PE=1 SV=1	0.873091	5.5e-05	92.625	1	S	_____MDPCKFRPSSSFDTKTTTTNAGAPVW	X;X;X;X;X;X;X;X;X;X;X;X;X;X;X;Phospho (STY);X;X;X;X;X;X;X;X;X;X;X;X;X;X;X	XXXXXXXXXXPPPPPPPPPPXXXXXXXXXXX	FRPS(0.003)S(0.124)S(0.873)FDTK	6	3	-0.64114			5719;5722	5722	13603	13763	12726	19017	17903	19819	14838	15507	15252
sp|Q0ITS8|RL101_ORYSJ	223	sp|Q0ITS8|RL101_ORYSJ	sp|Q0ITS8|RL101_ORYSJ	>sp|Q0ITS8|RL101_ORYSJ 60S ribosomal protein L10-1 OS=Oryza sativa subsp. japonica OX=39947 GN=SC34 PE=2 SV=1	0.999999	0.000331881	74.41	1	S	KRAPGKAFLAETIQASA______________	X;X;X;X;X;X;X;X;X;X;X;X;X;X;X;Phospho (STY);X;X;X;X;X;X;X;X;X;X;X;X;X;X;X	XXXXXXPPPPPPPPPPPXXXXXXXXXXXXXX	AFLAETIQAS(1)A	10	2	-0.41467			632;633;634	634	3215.8	4076.8	3578	3522.4	3579	3288.2	3384.6	3280.4	3574
sp|Q0IV63|DRB7_ORYSJ	449	sp|Q0IV63|DRB7_ORYSJ	sp|Q0IV63|DRB7_ORYSJ	>sp|Q0IV63|DRB7_ORYSJ Double-stranded RNA-binding protein 7 OS=Oryza sativa subsp. japonica OX=39947 GN=DRB7 PE=2 SV=1	0.985982	3.72e-05	132.83	1	S	ATNMKETPKNSAVCNSPETKEFGDITAMGSD	X;X;X;X;X;X;X;X;X;X;X;X;X;X;X;Phospho (STY);X;X;X;X;X;X;X;X;X;X;X;X;X;X;X	XXXXXXXXXPPPPPPPPPPPXXXXXXXXXXX	NS(0.007)AVCNS(0.986)PET(0.007)K	7	2	0.18511			12465;12466;12467;12468;12469	12465	28757	27573	28956	35579	32654	36566	29855	32606	33286
sp|Q0IWF3|NIP31_ORYSJ	41	sp|Q0IWF3|NIP31_ORYSJ	sp|Q0IWF3|NIP31_ORYSJ	>sp|Q0IWF3|NIP31_ORYSJ Aquaporin NIP3-1 OS=Oryza sativa subsp. japonica OX=39947 GN=NIP3-1 PE=2 SV=2	0.757419	0.0186003	38.76	1	S	TPGTPAPLFAGPRVDSLSYERKSMPRCKCLP	X;X;X;X;X;X;X;X;X;X;X;X;X;X;X;Phospho (STY);X;X;X;X;X;X;X;X;X;X;X;X;X;X;X	XXXXXXXXXXXXXPPPPPPPPXXXXXXXXXX	VDS(0.757)LS(0.242)YER	3	2	0.84012			18051;18052;18053	18051	49162	44317	46686	45939	45442	45453	58518	59793	61953
sp|Q0J035|PANK2_ORYSJ;tr|A0A0P0XPM8|A0A0P0XPM8_ORYSJ	166;17	sp|Q0J035|PANK2_ORYSJ	sp|Q0J035|PANK2_ORYSJ	>sp|Q0J035|PANK2_ORYSJ Pantothenate kinase 2 OS=Oryza sativa subsp. japonica OX=39947 GN=Os09g0533100 PE=2 SV=2;>tr|A0A0P0XPM8|A0A0P0XPM8_ORYSJ Os09g0533100 protein (Fragment) OS=Oryza sativa subsp. japonica OX=39947 GN=Os09g0533100 PE=4 SV=1	0.993405	0.000967292	93.555	1	S	LDFISSKQLHRGGVDSPSWRSGAQPDNIVIK	X;X;X;X;X;X;X;X;X;X;X;X;X;X;X;Phospho (STY);X;X;X;X;X;X;X;X;X;X;X;X;X;X;X	XXXXXXXXXXXPPPPPPPPPXXXXXXXXXXX	GGVDS(0.993)PS(0.007)WR	5	2	-1.6613			6572;6573;6574	6573	33371	34271	30737	28671	23875	26511	33353	33951	35866
sp|Q0J035|PANK2_ORYSJ	50	sp|Q0J035|PANK2_ORYSJ	sp|Q0J035|PANK2_ORYSJ	>sp|Q0J035|PANK2_ORYSJ Pantothenate kinase 2 OS=Oryza sativa subsp. japonica OX=39947 GN=Os09g0533100 PE=2 SV=2	0.53086	1.87e-18	88.637	1	S	GGAAATQAPAAMLPRSGSRPQLDLSGAAIHG	X;X;X;X;X;X;X;X;X;X;X;X;X;X;X;Phospho (STY);X;X;X;X;X;X;X;X;X;X;X;X;X;X;X	XXXXXXXXXXXXXXXPPPPPPPPPPPPPPPP	S(0.531)GS(0.46)RPQLDLS(0.01)GAAIHGNLEDR	1	4	-1.1246			14827;14828	14828	12031	13229	12117	13262	12745	12818	13142	12819	14138
sp|Q0J709|UP12_ORYSJ;tr|A0A0P0XDE8|A0A0P0XDE8_ORYSJ	126;63	sp|Q0J709|UP12_ORYSJ	sp|Q0J709|UP12_ORYSJ	>sp|Q0J709|UP12_ORYSJ ACT domain-containing protein DS12, chloroplastic OS=Oryza sativa subsp. japonica OX=39947 GN=Os08g0242700 PE=4 SV=2;>tr|A0A0P0XDE8|A0A0P0XDE8_ORYSJ Os08g0242700 protein (Fragment) OS=Oryza sativa subsp. japonica OX=39947 GN=Os08g0242	0.874002	0.0134948	30.425	1	S	KNLGLNVVKASVCLDSTGKHIKLAITKLSTG	X;X;X;X;X;X;X;X;X;X;X;X;X;X;X;Phospho (STY);X;X;X;X;X;X;X;X;X;X;X;X;X;X;X	XXXXXXXXXPPPPPPPPPPXXXXXXXXXXXX	ASVCLDS(0.874)T(0.126)GK	7	3	-0.06833			1937	1937	4025.3	4248.7	4697.7	5145.5	5177.8	4655.9	4726.9	4255.9	4348.1
sp|Q0J716|VLN5_ORYSJ	787	sp|Q0J716|VLN5_ORYSJ	sp|Q0J716|VLN5_ORYSJ	>sp|Q0J716|VLN5_ORYSJ Villin-5 OS=Oryza sativa subsp. japonica OX=39947 GN=VLN5 PE=3 SV=1	0.99996	5.99e-12	72.944	1	S	RSMSFSPERVRVRGRSPAFTALAANFESANS	X;X;X;X;X;Phospho (STY);X;X;X;X;X;X;X;X;X;Phospho (STY);X;X;X;X;X;X;X;X;X;X;X;X;X;X;X	XXXXXXXXXXXXXPPPPPPPPPPPPPPPPPP	GRS(1)PAFTALAANFESANSR	3	3	-0.94405			7303;7304;7305	7303	13934	13605	13296	15181	15188	15324	14904	14908	14244
sp|Q0J716|VLN5_ORYSJ	806	sp|Q0J716|VLN5_ORYSJ	sp|Q0J716|VLN5_ORYSJ	>sp|Q0J716|VLN5_ORYSJ Villin-5 OS=Oryza sativa subsp. japonica OX=39947 GN=VLN5 PE=3 SV=1	0.762525	0.000493666	64.887	1	S	TALAANFESANSRNLSTPPPVVKKLYPKSAT	X;X;X;X;X;X;X;X;X;X;X;X;X;X;X;Phospho (STY);X;X;X;X;X;X;X;X;X;X;X;X;X;X;X	XXXXXXXXXXXXXPPPPPPPPPPXXXXXXXX	NLS(0.763)T(0.237)PPPVVK	3	3	0.45477			12276;12277;12278;12279;12280;12281	12276	54128	49143	50493	50017	47716	48778	42871	44332	41961
sp|Q0J716|VLN5_ORYSJ	777	sp|Q0J716|VLN5_ORYSJ	sp|Q0J716|VLN5_ORYSJ	>sp|Q0J716|VLN5_ORYSJ Villin-5 OS=Oryza sativa subsp. japonica OX=39947 GN=VLN5 PE=3 SV=1	0.999926	0.00306646	75.407	1	S	STVQDKSQRSRSMSFSPERVRVRGRSPAFTA	X;X;X;X;X;X;X;X;X;X;X;X;X;X;X;Phospho (STY);X;X;X;X;X;X;X;X;X;Phospho (STY);X;X;X;X;X	XXXXXXXXXXXPPPPPPPPXXXXXXXXXXXX	SMSFS(1)PER	5	2	-0.023697			15297;15298;15299	15298	45361	46125	42756	41390	41612	43766	55480	57104	58723
sp|Q0J7U6|TPR2_ORYSJ	635	sp|Q0J7U6|TPR2_ORYSJ	sp|Q0J7U6|TPR2_ORYSJ	>sp|Q0J7U6|TPR2_ORYSJ Protein TOPLESS-RELATED PROTEIN 2 OS=Oryza sativa subsp. japonica OX=39947 GN=TPR2 PE=1 SV=1	0.999997	6.23e-21	92.91	1	S	TNILTTTDCDGGLPASPRLRFNREGSLLAVT	X;X;X;X;X;X;X;X;X;X;X;X;X;X;X;Phospho (STY);X;X;X;X;X;X;X;X;X;X;X;X;X;X;X	PPPPPPPPPPPPPPPPPPXXXXXXXXXXXXX	FWDMDNTNILTTTDCDGGLPAS(1)PR	22	3	0.33187			5825	5825	569.6	464.92	260.33	593.75	449.18	261.68	423.05	589.52	520.84
sp|Q0J8A4|G3PC1_ORYSJ;sp|Q6K5G8|G3PC3_ORYSJ;sp|Q7FAH2|G3PC2_ORYSJ;tr|A0A0P0WBW9|A0A0P0WBW9_ORYSJ	205;205;205;101	sp|Q0J8A4|G3PC1_ORYSJ;sp|Q6K5G8|G3PC3_ORYSJ;sp|Q7FAH2|G3PC2_ORYSJ	sp|Q7FAH2|G3PC2_ORYSJ	>sp|Q0J8A4|G3PC1_ORYSJ Glyceraldehyde-3-phosphate dehydrogenase 1, cytosolic OS=Oryza sativa subsp. japonica OX=39947 GN=GAPC1 PE=1 SV=1;>sp|Q6K5G8|G3PC3_ORYSJ Glyceraldehyde-3-phosphate dehydrogenase 3, cytosolic OS=Oryza sativa subsp. japonica OX=39947 G	0.999442	1.87e-10	72.482	1	S	VDGPSMKDWRGGRAASFNIIPSSTGAAKAVG;VDGPSSKDWRGGRAASFNIIPSSTGAAKAVG	X;X;X;X;X;X;X;X;X;X;X;X;X;X;X;Phospho (STY);X;X;X;X;X;X;X;X;X;X;X;X;X;X;X	XXXXXXXXXXXXXPPPPPPPPPPPPPPPXXX	AAS(0.999)FNIIPSSTGAAK	3	2	-0.67657			283;284;287	287	9649.1	8992.3	8819.3	10284	10280	10616	8819.1	10380	9623.5
sp|Q0J8A4|G3PC1_ORYSJ;sp|Q6K5G8|G3PC3_ORYSJ;sp|Q7FAH2|G3PC2_ORYSJ;tr|A0A0P0WBW9|A0A0P0WBW9_ORYSJ	212;212;212;108	sp|Q0J8A4|G3PC1_ORYSJ;sp|Q6K5G8|G3PC3_ORYSJ;sp|Q7FAH2|G3PC2_ORYSJ	sp|Q7FAH2|G3PC2_ORYSJ	>sp|Q0J8A4|G3PC1_ORYSJ Glyceraldehyde-3-phosphate dehydrogenase 1, cytosolic OS=Oryza sativa subsp. japonica OX=39947 GN=GAPC1 PE=1 SV=1;>sp|Q6K5G8|G3PC3_ORYSJ Glyceraldehyde-3-phosphate dehydrogenase 3, cytosolic OS=Oryza sativa subsp. japonica OX=39947 G	0.561062	0.000137656	43.34	1	S	DWRGGRAASFNIIPSSTGAAKAVGKVLPALN;DWRGGRAASFNIIPSSTGAAKAVGKVLPDLN	X;X;X;X;X;X;X;X;X;X;X;X;X;X;X;Phospho (STY);X;X;X;X;X;X;X;X;X;X;X;X;X;X;X	XXXXXXPPPPPPPPPPPPPPPXXXXXXXXXX	AASFNIIPS(0.045)S(0.561)T(0.394)GAAK	10	3	0.86685			285;286	285	8967.1	9267.6	8405.2	8487.1	8828.2	8718.7	8866.7	9219.4	8987.3
sp|Q0J8A4|G3PC1_ORYSJ	256	sp|Q0J8A4|G3PC1_ORYSJ	sp|Q0J8A4|G3PC1_ORYSJ	>sp|Q0J8A4|G3PC1_ORYSJ Glyceraldehyde-3-phosphate dehydrogenase 1, cytosolic OS=Oryza sativa subsp. japonica OX=39947 GN=GAPC1 PE=1 SV=1	0.99998	0.00477901	50.995	1	S	DVSVVDLTVRIEKAASYDAIKSAIKSASEGK	X;X;X;X;X;X;X;X;X;X;X;X;X;X;X;Phospho (STY);X;X;X;X;X;X;X;X;X;X;X;X;X;X;X	XXXXXXXXXXXXXPPPPPPPPXXXXXXXXXX	AAS(1)YDAIK	3	2	-0.31432			321;322;323	322	41891	49084	40542	39693	34839	37829	41232	43275	40320
sp|Q0J8A4|G3PC1_ORYSJ	234	sp|Q0J8A4|G3PC1_ORYSJ	sp|Q0J8A4|G3PC1_ORYSJ	>sp|Q0J8A4|G3PC1_ORYSJ Glyceraldehyde-3-phosphate dehydrogenase 1, cytosolic OS=Oryza sativa subsp. japonica OX=39947 GN=GAPC1 PE=1 SV=1	1	0.000414893	53.349	1	S	VGKVLPDLNGKLTGMSFRVPTVDVSVVDLTV	X;X;X;X;X;X;X;X;X;X;X;X;X;X;X;Phospho (STY);X;X;X;X;X;X;X;X;X;X;X;X;X;X;X	XXXXXXXXXXXPPPPPPPXXXXXXXXXXXXX	LTGMS(1)FR	5	2	1.4668			11085;11086;11087	11087	32073	31225	30104	29195	29361	28765	33958	34124	33983
sp|Q0J8M2|FER1_ORYSJ	86	sp|Q0J8M2|FER1_ORYSJ	sp|Q0J8M2|FER1_ORYSJ	>sp|Q0J8M2|FER1_ORYSJ Ferredoxin-1, chloroplastic OS=Oryza sativa subsp. japonica OX=39947 GN=ADI1 PE=1 SV=1	0.899225	1.17e-09	85.99	1	S	AEEEGIDLPYSCRAGSCSSCAGKVVSGEIDQ	X;X;X;X;X;X;X;X;X;X;Phospho (STY);X;X;X;X;Phospho (STY);X;X;X;X;X;X;X;X;X;X;X;X;X;X;X	XXXXXXXXXXXXXPPPPPPPPPPXXXXXXXX	AGS(0.899)CS(0.085)S(0.016)CAGK	3	2	0.45855			810;811	810	21847	21828	20957	21360	21174	23025	17653	16336	16976
sp|Q0J8M2|FER1_ORYSJ	81	sp|Q0J8M2|FER1_ORYSJ	sp|Q0J8M2|FER1_ORYSJ	>sp|Q0J8M2|FER1_ORYSJ Ferredoxin-1, chloroplastic OS=Oryza sativa subsp. japonica OX=39947 GN=ADI1 PE=1 SV=1	0.999954	1.18e-13	76.215	1	S	YILDQAEEEGIDLPYSCRAGSCSSCAGKVVS	X;X;X;X;X;X;X;X;X;X;X;X;X;X;X;Phospho (STY);X;X;X;X;Phospho (STY);X;X;X;X;X;X;X;X;X;X	PPPPPPPPPPPPPPPPPPXXXXXXXXXXXXX	LITPDGEVELQVPDDVYILDQAEEEGIDLPYS(1)CR	32	4	-0.076302			10343;10344	10343	447.68	252.22	145.87	109.34	461.42	299.26	222.18	169.99	156.35
sp|Q0J8M2|FER1_ORYSJ	105	sp|Q0J8M2|FER1_ORYSJ	sp|Q0J8M2|FER1_ORYSJ	>sp|Q0J8M2|FER1_ORYSJ Ferredoxin-1, chloroplastic OS=Oryza sativa subsp. japonica OX=39947 GN=ADI1 PE=1 SV=1	0.999142	5.46e-25	95.59	1	S	CAGKVVSGEIDQSDQSFLDDDQVAAGWVLTC	X;X;X;X;X;X;X;X;X;X;X;X;X;X;X;Phospho (STY);X;X;X;X;X;X;X;X;X;X;X;X;X;X;X	XXXXPPPPPPPPPPPPPPPPPPPPPPPPPPP	VVSGEIDQS(0.001)DQS(0.999)FLDDDQVAAGWVLTCHAYPK	12	4	1.3073			19342	19342	903.39	743.29	673.23	824.39	868.63	814.08	604.2	546.94	576.67
sp|Q0J952|C3H32_ORYSJ;tr|A0A0P0WGB2|A0A0P0WGB2_ORYSJ	410;89	sp|Q0J952|C3H32_ORYSJ	sp|Q0J952|C3H32_ORYSJ	>sp|Q0J952|C3H32_ORYSJ Zinc finger CCCH domain-containing protein 32 OS=Oryza sativa subsp. japonica OX=39947 GN=Os04g0671800 PE=2 SV=1;>tr|A0A0P0WGB2|A0A0P0WGB2_ORYSJ Os04g0671800 protein (Fragment) OS=Oryza sativa subsp. japonica OX=39947 GN=Os04g0671800	0.999656	7.44e-05	75.205	1	S	HRLRRRRINESSLAISPERNGEQRRRDERYR	X;X;X;X;X;X;X;X;X;X;X;X;X;X;X;Phospho (STY);X;X;X;X;X;X;X;X;X;X;X;X;X;X;X	XXXXXXXPPPPPPPPPPPPXXXXXXXXXXXX	INESSLAIS(1)PER	9	2	-0.14387			8507;8508;8509	8509	25530	24521	24540	27785	27393	28053	25090	24580	25784
sp|Q0J952|C3H32_ORYSJ;tr|A0A0P0WGB2|A0A0P0WGB2_ORYSJ	460;139	sp|Q0J952|C3H32_ORYSJ	sp|Q0J952|C3H32_ORYSJ	>sp|Q0J952|C3H32_ORYSJ Zinc finger CCCH domain-containing protein 32 OS=Oryza sativa subsp. japonica OX=39947 GN=Os04g0671800 PE=2 SV=1;>tr|A0A0P0WGB2|A0A0P0WGB2_ORYSJ Os04g0671800 protein (Fragment) OS=Oryza sativa subsp. japonica OX=39947 GN=Os04g0671800	0.99948	0.000706773	38.837	1	S	TLSSRLQGRIKLPGRSPDRVDTRSEKERDRR	X;X;X;X;X;X;X;X;X;X;X;X;X;X;X;Phospho (STY);X;X;X;X;X;X;X;X;X;X;X;X;X;X;X	XXXXXXXXXXXPPPPPPPPPPPPXXXXXXXX	LPGRS(0.999)PDRVDT(0.001)R	5	3	-0.022399			10668;10669	10668	16190	15287	14719	19024	17715	19290	17433	16144	16580
sp|Q0J952|C3H32_ORYSJ	43	sp|Q0J952|C3H32_ORYSJ	sp|Q0J952|C3H32_ORYSJ	>sp|Q0J952|C3H32_ORYSJ Zinc finger CCCH domain-containing protein 32 OS=Oryza sativa subsp. japonica OX=39947 GN=Os04g0671800 PE=2 SV=1	0.970631	0.000419293	39.08	1	S	EEALRRNTDCVYFLASPLTCKKGNECDFRHS	X;X;X;X;X;X;X;X;X;X;X;X;X;X;X;Phospho (STY);X;X;X;X;X;X;X;X;X;X;X;X;X;X;X	XXXXXXPPPPPPPPPPPPPPPXXXXXXXXXX	NTDCVY(0.004)FLAS(0.971)PLT(0.025)CK	10	3	-0.72827			12508;12509	12509	4177.2	3813.7	3659.7	4142.1	4199.9	3682.6	3550.7	3711.4	3639
sp|Q0J9W0|CCP11_ORYSJ	215	sp|Q0J9W0|CCP11_ORYSJ	sp|Q0J9W0|CCP11_ORYSJ	>sp|Q0J9W0|CCP11_ORYSJ Cyclin-P1-1 OS=Oryza sativa subsp. japonica OX=39947 GN=CYCP1-1 PE=3 SV=2	0.986889	0.00634479	44.849	1	S	ASAAAAAKAGRMAAVSPSKLLERAAVNGAAQ	X;X;X;X;X;X;X;X;X;X;X;X;X;X;X;Phospho (STY);X;X;X;X;X;X;X;X;X;X;X;X;X;X;X	XXXXXXXXXXXPPPPPPPPXXXXXXXXXXXX	MAAVS(0.987)PS(0.013)K	5	3	-0.12152			11423;11424;11425;11426;11427;11428	11424	50159	47740	48619	57357	56630	59178	46630	46352	46005
sp|Q0JBH9|ERG3_ORYSJ	133	sp|Q0JBH9|ERG3_ORYSJ	sp|Q0JBH9|ERG3_ORYSJ	>sp|Q0JBH9|ERG3_ORYSJ Elicitor-responsive protein 3 OS=Oryza sativa subsp. japonica OX=39947 GN=ERG3 PE=1 SV=1	1	1.54e-05	117.1	1	S	VGLTFTPEDDRDRGLSEEDIGGWKQSS____	X;X;X;X;X;X;X;X;X;X;X;X;X;X;X;Phospho (STY);X;X;X;X;X;X;X;X;X;X;X;X;X;X;X	XXXXXXXXXXXXXPPPPPPPPPPPXXXXXXX	GLS(1)EEDIGGWK	3	3	-1.0655			6998;6999;7000;7001;7002;7003	7003	33303	32423	29833	34141	34786	34269	35932	34839	35411
sp|Q0JD07|C3H28_ORYSJ	344	sp|Q0JD07|C3H28_ORYSJ	sp|Q0JD07|C3H28_ORYSJ	>sp|Q0JD07|C3H28_ORYSJ Zinc finger CCCH domain-containing protein 28 OS=Oryza sativa subsp. japonica OX=39947 GN=Os04g0438700 PE=2 SV=1	0.736223	0.0188341	34.439	1	S	NRPACRFYHPPASSNSIG_____________	X;X;X;X;X;X;X;X;X;X;X;X;X;X;X;Phospho (STY);X;X;X;X;X;X;X;X;X;X;X;X;X;X;X	XXXXXXPPPPPPPPPPPPXXXXXXXXXXXXX	FYHPPAS(0.132)S(0.132)NS(0.736)IG	10	2	0.99927			5846	5846	5265.7	6191.6	5023.2	4950.7	4851.2	6309.2	4915.9	5539.1	4986.5
sp|Q0JD07|C3H28_ORYSJ	88	sp|Q0JD07|C3H28_ORYSJ	sp|Q0JD07|C3H28_ORYSJ	>sp|Q0JD07|C3H28_ORYSJ Zinc finger CCCH domain-containing protein 28 OS=Oryza sativa subsp. japonica OX=39947 GN=Os04g0438700 PE=2 SV=1	0.996236	0.00273605	37.269	2	S	RGRSRSRSRSRSRGRSASPRYPDGKRRRHND	X;X;X;X;X;X;X;X;X;X;X;X;X;X;X;Phospho (STY);X;Phospho (STY);X;X;X;X;X;X;X;X;X;X;X;X;X	XXXXXXXXXXXXXPPPPPPPPPPPPXXXXXX	GRS(0.996)AS(0.988)PRY(0.016)PDGK	3	3	0.66987			7293	7293	14312	10630	14079	13982	10765	10426	9150.7	8485.6	8233.9
sp|Q0JD07|C3H28_ORYSJ	90	sp|Q0JD07|C3H28_ORYSJ	sp|Q0JD07|C3H28_ORYSJ	>sp|Q0JD07|C3H28_ORYSJ Zinc finger CCCH domain-containing protein 28 OS=Oryza sativa subsp. japonica OX=39947 GN=Os04g0438700 PE=2 SV=1	0.987507	0.00273605	37.269	2	S	RSRSRSRSRSRGRSASPRYPDGKRRRHNDLN	X;X;X;X;X;X;X;X;X;X;X;X;X;Phospho (STY);X;Phospho (STY);X;X;X;X;X;X;X;X;X;X;X;X;X;X;X	XXXXXXXXXXXPPPPPPPPPPPPXXXXXXXX	GRS(0.996)AS(0.988)PRY(0.016)PDGK	5	3	0.66987			7293	7293	14312	10630	14079	13982	10765	10426	9150.7	8485.6	8233.9
sp|Q0JEF5|FLP4_ORYSJ	116	sp|Q0JEF5|FLP4_ORYSJ	sp|Q0JEF5|FLP4_ORYSJ	>sp|Q0JEF5|FLP4_ORYSJ Flowering-promoting factor 1-like protein 4 OS=Oryza sativa subsp. japonica OX=39947 GN=Os04g0282400 PE=3 SV=1	0.99269	0.00296881	67.527	1	S	KTRNVFEVRDAATTASPP_____________	X;X;X;X;X;X;X;X;X;X;X;X;X;X;X;Phospho (STY);X;X;X;X;X;X;X;X;X;X;X;X;X;X;X	XXXXXXXXXPPPPPPPPPXXXXXXXXXXXXX	DAAT(0.001)T(0.006)AS(0.993)PP	7	2	0.92257			2511;2512;2513	2512	13660	14333	13565	19737	18457	20292	15501	16833	15998
sp|Q0JGK4|SPSA1_ORYSJ	740	sp|Q0JGK4|SPSA1_ORYSJ	sp|Q0JGK4|SPSA1_ORYSJ	>sp|Q0JGK4|SPSA1_ORYSJ Probable sucrose-phosphate synthase 1 OS=Oryza sativa subsp. japonica OX=39947 GN=SPS1 PE=2 SV=2	0.778224	4.45e-11	73.077	1	S	QDLSLRLSIDGERGSSMNDAPSSDPQDSVQR	X;X;X;X;X;X;X;X;X;X;X;X;X;X;X;Phospho (STY);X;X;X;X;X;X;X;X;X;X;X;X;X;X;X	XXXXXXXXXXXXXPPPPPPPPPPPPPPPPPP	GS(0.222)S(0.778)MNDAPSSDPQDSVQR	3	3	-0.093325			7433;7434;7435;7436	7435	18768	19535	17320	17860	17241	18342	19900	21443	19294
sp|Q0JGK4|SPSA1_ORYSJ	470	sp|Q0JGK4|SPSA1_ORYSJ	sp|Q0JGK4|SPSA1_ORYSJ	>sp|Q0JGK4|SPSA1_ORYSJ Probable sucrose-phosphate synthase 1 OS=Oryza sativa subsp. japonica OX=39947 GN=SPS1 PE=2 SV=2	0.762625	6.59e-35	121.88	1	S	PPGMDFSSVVVPEDTSDGDDGKDFEIASPRS	X;X;X;X;X;X;X;X;X;X;X;X;X;X;X;Phospho (STY);X;X;X;X;X;X;X;X;X;X;X;X;X;X;X	PPPPPPPPPPPPPPPPPPPPPPPPPPPPPPX	MVVIPPGMDFS(0.006)S(0.027)VVVPEDT(0.204)S(0.763)DGDDGKDFEIASPR	20	4	-0.17024			11886;11887;11888;11889;11890	11886	8976.4	7572.4	8104	6669	7582.5	8184.4	7714.2	8175.7	8355.7
sp|Q0JGK4|SPSA1_ORYSJ	482	sp|Q0JGK4|SPSA1_ORYSJ	sp|Q0JGK4|SPSA1_ORYSJ	>sp|Q0JGK4|SPSA1_ORYSJ Probable sucrose-phosphate synthase 1 OS=Oryza sativa subsp. japonica OX=39947 GN=SPS1 PE=2 SV=2	0.999688	1.27e-19	90.166	1	S	EDTSDGDDGKDFEIASPRSLPPIWAEVMRFL	X;X;X;X;X;X;X;X;X;X;X;X;X;X;X;Phospho (STY);X;X;X;X;X;X;X;X;X;X;X;X;X;X;X	PPPPPPPPPPPPPPPPPPXXXXXXXXXXXXX	MVVIPPGMDFSSVVVPEDTSDGDDGKDFEIAS(1)PR	32	5	-0.068797			11879;11880;11881;11882;11883;11885;11891	11885	7108.6	7402.8	7349.6	7445.7	7611.3	7724.1	7084.1	7678.1	7561.9
sp|Q0JGK4|SPSA1_ORYSJ;tr|A0A0P0VCD2|A0A0P0VCD2_ORYSJ	179;78	sp|Q0JGK4|SPSA1_ORYSJ	sp|Q0JGK4|SPSA1_ORYSJ	>sp|Q0JGK4|SPSA1_ORYSJ Probable sucrose-phosphate synthase 1 OS=Oryza sativa subsp. japonica OX=39947 GN=SPS1 PE=2 SV=2;>tr|A0A0P0VCD2|A0A0P0VCD2_ORYSJ Os01g0919400 protein (Fragment) OS=Oryza sativa subsp. japonica OX=39947 GN=Os01g0919400 PE=4 SV=1	0.999531	2.86e-13	153.79	1	S	AQQDTPMKKKFQRNFSELTVSWSDENKEKKL	X;X;X;X;X;X;X;X;X;X;X;X;X;X;X;Phospho (STY);X;X;X;X;X;X;X;X;X;X;X;X;X;X;X	XXXXXXXXXXXXXPPPPPPPPPPPPPPPPXX	NFS(1)ELTVSWSDENKEK	3	4	0.3462			12060;12061;12064;12065;12066;12067;12069;12070;12071;12072;12073;12078	12078	94038	99508	86135	72271	68237	71140	95367	100230	93979
sp|Q0JGK4|SPSA1_ORYSJ	50	sp|Q0JGK4|SPSA1_ORYSJ	sp|Q0JGK4|SPSA1_ORYSJ	>sp|Q0JGK4|SPSA1_ORYSJ Probable sucrose-phosphate synthase 1 OS=Oryza sativa subsp. japonica OX=39947 GN=SPS1 PE=2 SV=2	1	0.0111943	48.961	2	S	GGGGGGGGGGGVDPRSPAAGAASPRGPHMNF	X;X;X;X;X;X;X;X;X;X;X;X;X;X;X;Phospho (STY);X;X;X;X;X;X;Phospho (STY);X;X;X;X;X;X;X;X	XXXXXXXXXXXXXXXPPPPPPPPPPXXXXXX	S(1)PAAGAAS(1)PR	1	2	-0.3286			15402;15403	15403	25616	32591	21987	35259	23509	23231	23144	23732	22586
sp|Q0JGK4|SPSA1_ORYSJ	57	sp|Q0JGK4|SPSA1_ORYSJ	sp|Q0JGK4|SPSA1_ORYSJ	>sp|Q0JGK4|SPSA1_ORYSJ Probable sucrose-phosphate synthase 1 OS=Oryza sativa subsp. japonica OX=39947 GN=SPS1 PE=2 SV=2	1	0.000616806	46.99	1;2	S	GGGGVDPRSPAAGAASPRGPHMNFNPTHYFV	X;X;X;X;X;X;X;X;Phospho (STY);X;X;X;X;X;X;Phospho (STY);X;X;X;X;X;X;X;X;X;X;X;X;X;X;X	XXXXXXXXPPPPPPPPPPXXXXXXXXXXXXX	S(1)PAAGAAS(1)PR	8	2	-0.3286			15393;15394;15395;15396;15397;15398;15399;15400;15401;15402;15403	15403	88908	92795	82813	97344	83669	86088	93008	91780	89284
sp|Q0JHF1|BZP12_ORYSJ	65	sp|Q0JHF1|BZP12_ORYSJ	sp|Q0JHF1|BZP12_ORYSJ	>sp|Q0JHF1|BZP12_ORYSJ bZIP transcription factor 12 OS=Oryza sativa subsp. japonica OX=39947 GN=BZIP12 PE=2 SV=1	0.999583	3.63e-18	73.72	1	S	MPTPALPLVGGDRPMSPLPAPDVAAAPRTAE	X;X;X;X;X;X;X;X;X;X;X;X;X;X;X;Phospho (STY);X;X;X;X;X;X;X;X;X;X;X;X;X;X;X	PPPPPPPPPPPPPPPPPPPPPPPPPPPPXXX	GIYADMPTPALPLVGGDRPMS(1)PLPAPDVAAAPR	21	4	-0.61017			6787;6788;6789	6787	1492.3	1772.4	1696.8	1597.4	1569.1	1825.8	1313.5	1677.1	1802.4
sp|Q0JMH0|HACL_ORYSJ;tr|B7EAG8|B7EAG8_ORYSJ	199;199	sp|Q0JMH0|HACL_ORYSJ	sp|Q0JMH0|HACL_ORYSJ	>sp|Q0JMH0|HACL_ORYSJ 2-hydroxyacyl-CoA lyase OS=Oryza sativa subsp. japonica OX=39947 GN=Os01g0505400 PE=3 SV=3;>tr|B7EAG8|B7EAG8_ORYSJ Os01g0505400 protein OS=Oryza sativa subsp. japonica OX=39947 GN=Os01g0505400 PE=2 SV=1	0.54954	0.00511505	39.428	1	S	AALIDAAAADSAKSDSSPPKHKSLDEGIEKA	X;X;X;X;X;X;X;X;X;X;X;X;X;X;X;Phospho (STY);X;X;X;X;X;X;X;X;X;X;X;X;X;X;X	XXXXXXXXXXXXXPPPPPPPPPXXXXXXXXX	S(0.1)DS(0.55)S(0.351)PPKHK	3	3	0.051322			14345	14345	9403.3	10333	9010.6	10923	11486	10657	11092	11008	11522
sp|Q0JMH0|HACL_ORYSJ;tr|B7EAG8|B7EAG8_ORYSJ	200;200	sp|Q0JMH0|HACL_ORYSJ	sp|Q0JMH0|HACL_ORYSJ	>sp|Q0JMH0|HACL_ORYSJ 2-hydroxyacyl-CoA lyase OS=Oryza sativa subsp. japonica OX=39947 GN=Os01g0505400 PE=3 SV=3;>tr|B7EAG8|B7EAG8_ORYSJ Os01g0505400 protein OS=Oryza sativa subsp. japonica OX=39947 GN=Os01g0505400 PE=2 SV=1	0.974916	0.00145583	56.713	1	S	ALIDAAAADSAKSDSSPPKHKSLDEGIEKAA	X;X;X;X;X;X;X;X;X;X;X;X;X;X;X;Phospho (STY);X;X;X;X;X;X;X;X;X;X;X;X;X;X;X	XXXXXXXXXXXXPPPPPPPPPXXXXXXXXXX	S(0.003)DS(0.022)S(0.975)PPKHK	4	3	0.18685			14346	14346	8545.6	8505.2	8512.1	8484	8594.7	9894.7	9788	9681.1	9905.7
sp|Q0JPT4|BZR2_ORYSJ	171	sp|Q0JPT4|BZR2_ORYSJ	sp|Q0JPT4|BZR2_ORYSJ	>sp|Q0JPT4|BZR2_ORYSJ Protein BZR1 homolog 2 OS=Oryza sativa subsp. japonica OX=39947 GN=BZR2 PE=1 SV=1	0.455132	0.00931307	26.239		S	VDGNPILPWLKTLSNSPSSKKHPQLPPLLIH	X;X;X;X;X;X;X;X;X;X;X;X;X;X;X;Phospho (STY);X;X;X;X;X;X;X;X;X;X;X;X;X;X;X	XXXXXXXXXXXPPPPPPPPPXXXXXXXXXXX	TLS(0.002)NS(0.455)PS(0.455)S(0.088)K	5	2	-0.3838				17132	0	0	0	0	0	0	0	0	0
sp|Q0JPT4|BZR2_ORYSJ	173	sp|Q0JPT4|BZR2_ORYSJ	sp|Q0JPT4|BZR2_ORYSJ	>sp|Q0JPT4|BZR2_ORYSJ Protein BZR1 homolog 2 OS=Oryza sativa subsp. japonica OX=39947 GN=BZR2 PE=1 SV=1	0.632942	0.00931307	26.239	1	S	GNPILPWLKTLSNSPSSKKHPQLPPLLIHGG	X;X;X;X;X;X;X;X;X;X;X;X;X;X;X;Phospho (STY);X;X;X;X;X;X;X;X;X;X;X;X;X;X;X	XXXXXXXXXPPPPPPPPPXXXXXXXXXXXXX	T(0.002)LS(0.003)NS(0.114)PS(0.633)S(0.248)K	7	2	0.078851			17133	17133	10485	10990	11119	10975	10027	10971	11632	12838	11520
sp|Q10CE4|GLO1_ORYSJ	28	sp|Q10CE4|GLO1_ORYSJ	sp|Q10CE4|GLO1_ORYSJ	>sp|Q10CE4|GLO1_ORYSJ Peroxisomal (S)-2-hydroxy-acid oxidase GLO1 OS=Oryza sativa subsp. japonica OX=39947 GN=GLO1 PE=1 SV=1	0.999983	6.11e-19	118.4	1	S	IAKQKLPKMIYDYYASGAEDEWTLKENREAF	X;X;X;X;X;X;X;X;Oxidation (M);X;X;X;X;X;X;Phospho (STY);X;X;X;X;X;X;X;X;X;X;X;X;X;X;X	XXXXXXXXPPPPPPPPPPPPPPPPPXXXXXX	MIYDYYAS(1)GAEDEWTLK	8	3	0.56399			11641;11642;11643;11644;11645;11646;11647	11644	13502	13432	11301	11416	11372	11588	12129	11984	12230
tr|Q0DNP6|Q0DNP6_ORYSJ;sp|Q10D38|MRS2I_ORYSJ	94;229	tr|Q0DNP6|Q0DNP6_ORYSJ	tr|Q0DNP6|Q0DNP6_ORYSJ	>tr|Q0DNP6|Q0DNP6_ORYSJ Magnesium transporter (Fragment) OS=Oryza sativa subsp. japonica OX=39947 GN=Os03g0742400 PE=3 SV=1;>sp|Q10D38|MRS2I_ORYSJ Magnesium transporter MRS2-I OS=Oryza sativa subsp. japonica OX=39947 GN=MRS2-I PE=2 SV=1	0.989131	3.53e-15	81.319	3	S	DMADLYLSRKLAGAASPVSGSGGPNWFPASP	X;X;X;X;X;X;X;X;X;X;X;X;X;X;X;Phospho (STY);X;X;Phospho (STY);X;X;X;X;X;X;X;X;X;X;Phospho (STY);X	XXXXXXXXXPPPPPPPPPPPPPPPPPPPPPP	KLAGAAS(0.989)PVS(0.765)GS(0.246)GGPNWFPAS(0.936)PT(0.062)IGS(0.002)K	7	4	0.93796			9219;9220	9219	2249.1	2853	2083.5	1995.7	2021	1964.4	2244.1	1665.1	1786.5
tr|Q0DNP6|Q0DNP6_ORYSJ;sp|Q10D38|MRS2I_ORYSJ	97;232	tr|Q0DNP6|Q0DNP6_ORYSJ	tr|Q0DNP6|Q0DNP6_ORYSJ	>tr|Q0DNP6|Q0DNP6_ORYSJ Magnesium transporter (Fragment) OS=Oryza sativa subsp. japonica OX=39947 GN=Os03g0742400 PE=3 SV=1;>sp|Q10D38|MRS2I_ORYSJ Magnesium transporter MRS2-I OS=Oryza sativa subsp. japonica OX=39947 GN=MRS2-I PE=2 SV=1	0.764894	3.53e-15	81.319	3	S	DLYLSRKLAGAASPVSGSGGPNWFPASPTIG	X;X;X;X;X;X;X;X;X;X;X;X;Phospho (STY);X;X;Phospho (STY);X;X;X;X;X;X;X;X;X;X;Phospho (STY);X;X;X;X	XXXXXXPPPPPPPPPPPPPPPPPPPPPPPPP	KLAGAAS(0.989)PVS(0.765)GS(0.246)GGPNWFPAS(0.936)PT(0.062)IGS(0.002)K	10	4	0.93796			9219;9220	9219	2249.1	2853	2083.5	1995.7	2021	1964.4	2244.1	1665.1	1786.5
tr|Q0DNP6|Q0DNP6_ORYSJ;sp|Q10D38|MRS2I_ORYSJ	99;234	tr|Q0DNP6|Q0DNP6_ORYSJ	tr|Q0DNP6|Q0DNP6_ORYSJ	>tr|Q0DNP6|Q0DNP6_ORYSJ Magnesium transporter (Fragment) OS=Oryza sativa subsp. japonica OX=39947 GN=Os03g0742400 PE=3 SV=1;>sp|Q10D38|MRS2I_ORYSJ Magnesium transporter MRS2-I OS=Oryza sativa subsp. japonica OX=39947 GN=MRS2-I PE=2 SV=1	0.516458	0.000328841	40.178	3	S	YLSRKLAGAASPVSGSGGPNWFPASPTIGSK	X;X;X;X;X;X;X;X;X;X;X;X;X;X;X;X;X;X;X;X;X;X;X;X;X;X;X;X;X;X;X	XXXXXXXXXXXXXXXXXXXXXXXXXXXXXXX	KLAGAAS(0.967)PVS(0.516)GS(0.516)GGPNWFPAS(0.712)PT(0.273)IGS(0.016)K	12	4	1.6339			9220	9220	1056.8	849.37	753.18	769.9	675.52	743.19	836.91	778.81	613.62
tr|Q0DNP6|Q0DNP6_ORYSJ;sp|Q10D38|MRS2I_ORYSJ	108;243	tr|Q0DNP6|Q0DNP6_ORYSJ	tr|Q0DNP6|Q0DNP6_ORYSJ	>tr|Q0DNP6|Q0DNP6_ORYSJ Magnesium transporter (Fragment) OS=Oryza sativa subsp. japonica OX=39947 GN=Os03g0742400 PE=3 SV=1;>sp|Q10D38|MRS2I_ORYSJ Magnesium transporter MRS2-I OS=Oryza sativa subsp. japonica OX=39947 GN=MRS2-I PE=2 SV=1	0.936358	3.53e-15	81.319	3	S	ASPVSGSGGPNWFPASPTIGSKISRASRASA	X;Phospho (STY);X;X;Phospho (STY);X;X;X;X;X;X;X;X;X;X;Phospho (STY);X;X;X;X;X;X;X;X;X;X;X;X;X;X;X	PPPPPPPPPPPPPPPPPPPPPPXXXXXXXXX	KLAGAAS(0.989)PVS(0.765)GS(0.246)GGPNWFPAS(0.936)PT(0.062)IGS(0.002)K	21	4	0.93796			9219;9220	9219	2249.1	2853	2083.5	1995.7	2021	1964.4	2244.1	1665.1	1786.5
sp|Q10DV7|ACT1_ORYSJ	236	sp|Q10DV7|ACT1_ORYSJ	sp|Q10DV7|ACT1_ORYSJ	>sp|Q10DV7|ACT1_ORYSJ Actin-1 OS=Oryza sativa subsp. japonica OX=39947 GN=ACT1 PE=2 SV=1	0.883734	0.0338318	14.68	1	S	IALDYDQEMETAKTSSSVEKSYELPDGQVIT	X;X;X;X;X;X;X;X;X;X;X;X;X;X;X;Phospho (STY);X;X;X;X;X;X;X;X;X;X;X;X;X;X;X	XXXXXXXXXXXXXPPPPPPPXXXXXXXXXXX	T(0.011)S(0.037)S(0.884)S(0.069)VEK	3	2	1.1907			17458	17458	11854	14037	12244	13537	12637	13513	14977	14829	14815
sp|Q10EL1|C3H24_ORYSJ	676	sp|Q10EL1|C3H24_ORYSJ	sp|Q10EL1|C3H24_ORYSJ	>sp|Q10EL1|C3H24_ORYSJ Zinc finger CCCH domain-containing protein 24 OS=Oryza sativa subsp. japonica OX=39947 GN=Os03g0698800 PE=2 SV=1	0.333333	0.019073	17.723		S	PDWGVNGEELGKLRRSSSFELRSGGDDPDLS	X;X;X;X;X;X;X;X;X;X;X;X;X;X;X;Phospho (STY);X;X;X;X;X;X;X;X;X;X;X;X;X;X;X	XXXXXXXXXXXXXXPPPPPPPPXXXXXXXXX	RS(0.333)S(0.333)S(0.333)FELR	2	3	0.48571				13863	0	0	0	0	0	0	0	0	0
sp|Q10EL1|C3H24_ORYSJ	677	sp|Q10EL1|C3H24_ORYSJ	sp|Q10EL1|C3H24_ORYSJ	>sp|Q10EL1|C3H24_ORYSJ Zinc finger CCCH domain-containing protein 24 OS=Oryza sativa subsp. japonica OX=39947 GN=Os03g0698800 PE=2 SV=1	0.528655	0.019073	13.585	1	S	DWGVNGEELGKLRRSSSFELRSGGDDPDLSW	X;X;X;X;X;X;X;X;X;X;X;X;X;X;X;Phospho (STY);X;X;X;X;X;X;X;X;X;X;X;X;X;X;X	XXXXXXXXXXXXXPPPPPPPPXXXXXXXXXX	RS(0.161)S(0.529)S(0.311)FELR	3	2	0.70685			13864	13864	7611.3	8799.8	7670.6	8612.8	7794.1	8055.7	7825.7	7828.2	8302.1
sp|Q10EL1|C3H24_ORYSJ	678	sp|Q10EL1|C3H24_ORYSJ	sp|Q10EL1|C3H24_ORYSJ	>sp|Q10EL1|C3H24_ORYSJ Zinc finger CCCH domain-containing protein 24 OS=Oryza sativa subsp. japonica OX=39947 GN=Os03g0698800 PE=2 SV=1	0.961204	0.0127548	47.816	1	S	WGVNGEELGKLRRSSSFELRSGGDDPDLSWV	X;X;X;X;X;X;X;X;X;X;X;X;X;X;X;Phospho (STY);X;X;X;X;X;X;X;X;X;X;X;X;X;X;X	XXXXXXXXXXXXXPPPPPPPXXXXXXXXXXX	S(0.019)S(0.019)S(0.961)FELR	3	2	0.075526			15853	15853	5641.3	5740.3	5525.9	6584.7	6601.5	5918.4	5553.4	6173	6071.4
sp|Q10EL1|C3H24_ORYSJ	527	sp|Q10EL1|C3H24_ORYSJ	sp|Q10EL1|C3H24_ORYSJ	>sp|Q10EL1|C3H24_ORYSJ Zinc finger CCCH domain-containing protein 24 OS=Oryza sativa subsp. japonica OX=39947 GN=Os03g0698800 PE=2 SV=1	0.934642	2.61e-18	95.376	1	S	NPSNLDDLFSAEMVSSPRYSNADQGGMFSPS	X;X;X;X;X;X;X;X;X;X;X;X;X;X;X;Phospho (STY);X;X;X;X;X;X;X;X;X;X;X;X;Phospho (STY);X;X	PPPPPPPPPPPPPPPPPPXXXXXXXXXXXXX	SLNPSNLDDLFS(0.001)AEMVS(0.065)S(0.935)PR	18	3	0.15905			15169;15170;15171	15170	1792.9	2092.9	1618.1	2205.8	2064.5	1779.1	1737	1582.3	1543.5
sp|Q10EL1|C3H24_ORYSJ	540	sp|Q10EL1|C3H24_ORYSJ	sp|Q10EL1|C3H24_ORYSJ	>sp|Q10EL1|C3H24_ORYSJ Zinc finger CCCH domain-containing protein 24 OS=Oryza sativa subsp. japonica OX=39947 GN=Os03g0698800 PE=2 SV=1	0.98979	2.25e-09	80.29	1	S	VSSPRYSNADQGGMFSPSHKAAFLNQFQQQQ	X;X;Phospho (STY);X;X;X;X;X;X;X;X;X;X;X;X;Phospho (STY);X;X;X;X;X;X;X;X;X;X;X;X;X;X;X	XXXXXPPPPPPPPPPPPPPPXXXXXXXXXXX	YSNADQGGMFS(0.99)PS(0.01)HK	11	3	-0.18134			20088;20089;20090;20091	20088	27322	28766	25871	24897	21367	23397	25704	27966	27097
sp|Q10F25|GAT18_ORYSJ	275	sp|Q10F25|GAT18_ORYSJ	sp|Q10F25|GAT18_ORYSJ	>sp|Q10F25|GAT18_ORYSJ GATA transcription factor 18 OS=Oryza sativa subsp. japonica OX=39947 GN=GATA18 PE=2 SV=1	0.905817	2.19e-14	74.554	1	S	VESSVVATEQSNAAVSPSGIDNKELVVPNPE	X;X;X;X;X;X;X;X;X;X;X;X;X;X;X;Phospho (STY);X;X;X;X;X;X;X;X;X;X;X;X;X;X;X	PPPPPPPPPPPPPPPPPPPPPPPXXXXXXXX	VESSVVATEQS(0.034)NAAVS(0.906)PS(0.06)GIDNK	16	3	-0.73242			18203;18204;18205;18206	18206	12249	13991	12091	14215	12590	14814	12211	12785	11534
sp|Q10HD0|CB23_ORYSJ	41	sp|Q10HD0|CB23_ORYSJ	sp|Q10HD0|CB23_ORYSJ	>sp|Q10HD0|CB23_ORYSJ Chlorophyll a-b binding protein, chloroplastic OS=Oryza sativa subsp. japonica OX=39947 GN=RCABP89 PE=2 SV=1	0.9995	1.35e-08	85.327	1;2	S	VGDSGGRITMRRTVKSAPQSIWYGPDRPKYL	X;X;X;X;X;X;X;X;Phospho (STY);X;X;X;Phospho (STY);X;X;Phospho (STY);X;X;X;X;X;X;X;X;X;X;X;X;X;X;X	XXXXXXXXXXXXPPPPPPPPPPPPPPPPPXX	S(0.999)APQSIWYGPDRPK	1	3	-0.53246			14129;14130;14131;17616	14129	41719	41266	38001	41183	42067	43820	41243	40833	42023
sp|Q10JI3|NNJA3_ORYSJ	51	sp|Q10JI3|NNJA3_ORYSJ	sp|Q10JI3|NNJA3_ORYSJ	>sp|Q10JI3|NNJA3_ORYSJ Ninja-family protein Os03g0419100 OS=Oryza sativa subsp. japonica OX=39947 GN=Os03g0419100 PE=2 SV=1	0.998676	0.000979713	69.552	1	S	LSLGLSLGGRFGTDMSPDAKRARLARSSSIA	X;X;X;X;X;X;X;X;X;X;X;X;X;X;X;Phospho (STY);X;X;X;X;X;X;X;X;X;X;Phospho (STY);X;X;X;X	XXXXXXXXXXPPPPPPPPPPPXXXXXXXXXX	FGT(0.001)DMS(0.999)PDAK	6	2	0.94256			5527;5528;5529;5530;5531	5528	51943	52378	46611	51179	46186	51635	48952	49549	49600
sp|Q10JI3|NNJA3_ORYSJ	62	sp|Q10JI3|NNJA3_ORYSJ	sp|Q10JI3|NNJA3_ORYSJ	>sp|Q10JI3|NNJA3_ORYSJ Ninja-family protein Os03g0419100 OS=Oryza sativa subsp. japonica OX=39947 GN=Os03g0419100 PE=2 SV=1	0.326636	1.25e-06	46.07		S	GTDMSPDAKRARLARSSSIASVCSVSAADGD	X;X;X;X;Phospho (STY);X;X;X;X;X;X;X;X;X;X;Phospho (STY);X;X;X;X;Phospho (STY);X;X;X;X;X;X;X;X;X;X	XXXXXXXXXXXXXXXPPPPPPPPPPPPPPPP	S(0.327)S(0.331)S(0.335)IAS(0.838)VCS(0.125)VS(0.044)AADGDPS(0.002)PAAPLPLLR	1	3	-0.8788				15902	0	0	0	0	0	0	0	0	0
sp|Q10JI3|NNJA3_ORYSJ	63	sp|Q10JI3|NNJA3_ORYSJ	sp|Q10JI3|NNJA3_ORYSJ	>sp|Q10JI3|NNJA3_ORYSJ Ninja-family protein Os03g0419100 OS=Oryza sativa subsp. japonica OX=39947 GN=Os03g0419100 PE=2 SV=1	0.330504	1.25e-06	46.07		S	TDMSPDAKRARLARSSSIASVCSVSAADGDP	X;X;X;Phospho (STY);X;X;X;X;X;X;X;X;X;X;X;X;X;X;X;X;X;X;X;X;X;X;X;X;X;X;X	XXXXXXXXXXXXXXXXXXXXXXXXXXXXXXX	S(0.327)S(0.331)S(0.335)IAS(0.838)VCS(0.125)VS(0.044)AADGDPS(0.002)PAAPLPLLR	2	3	-0.8788				15902	0	0	0	0	0	0	0	0	0
sp|Q10JI3|NNJA3_ORYSJ	64	sp|Q10JI3|NNJA3_ORYSJ	sp|Q10JI3|NNJA3_ORYSJ	>sp|Q10JI3|NNJA3_ORYSJ Ninja-family protein Os03g0419100 OS=Oryza sativa subsp. japonica OX=39947 GN=Os03g0419100 PE=2 SV=1	0.33475	1.25e-06	46.07		S	DMSPDAKRARLARSSSIASVCSVSAADGDPS	X;X;Phospho (STY);X;X;X;X;X;X;X;X;X;X;X;X;X;X;X;X;X;X;X;X;X;X;X;X;X;X;X;X	XXXXXXXXXXXXXXXXXXXXXXXXXXXXXXX	S(0.327)S(0.331)S(0.335)IAS(0.838)VCS(0.125)VS(0.044)AADGDPS(0.002)PAAPLPLLR	3	3	-0.8788				15902	0	0	0	0	0	0	0	0	0
sp|Q10JI3|NNJA3_ORYSJ	67	sp|Q10JI3|NNJA3_ORYSJ	sp|Q10JI3|NNJA3_ORYSJ	>sp|Q10JI3|NNJA3_ORYSJ Ninja-family protein Os03g0419100 OS=Oryza sativa subsp. japonica OX=39947 GN=Os03g0419100 PE=2 SV=1	0.858939	4.49e-47	145.56	1;2	S	PDAKRARLARSSSIASVCSVSAADGDPSPAA	X;X;X;X;X;X;X;X;X;X;Phospho (STY);X;X;X;X;Phospho (STY);X;X;X;X;X;X;X;X;X;X;X;X;X;X;X	XXXXXXXXXXPPPPPPPPPPPPPPPPPPPPP	S(0.032)S(0.032)S(0.078)IAS(0.859)VCSVSAADGDPSPAAPLPLLR	6	3	0.1419			15899;15900;15901;15902	15901	1986.3	2091.2	2515	2343.2	2608.2	2358.5	3063.9	2394.1	2194.3
sp|Q10JI3|NNJA3_ORYSJ	70	sp|Q10JI3|NNJA3_ORYSJ	sp|Q10JI3|NNJA3_ORYSJ	>sp|Q10JI3|NNJA3_ORYSJ Ninja-family protein Os03g0419100 OS=Oryza sativa subsp. japonica OX=39947 GN=Os03g0419100 PE=2 SV=1	0.489002	3.67e-11	72.202		S	KRARLARSSSIASVCSVSAADGDPSPAAPLP	X;X;X;X;X;X;X;X;X;X;X;X;X;X;X;Phospho (STY);X;X;X;X;X;X;X;X;X;X;X;X;X;X;X	XXXXXXXPPPPPPPPPPPPPPPPPPPPPPPP	S(0.005)S(0.005)S(0.004)IAS(0.008)VCS(0.489)VS(0.489)AADGDPSPAAPLPLLR	9	3	-0.34798				15898	0	0	0	0	0	0	0	0	0
sp|Q10JI3|NNJA3_ORYSJ	72	sp|Q10JI3|NNJA3_ORYSJ	sp|Q10JI3|NNJA3_ORYSJ	>sp|Q10JI3|NNJA3_ORYSJ Ninja-family protein Os03g0419100 OS=Oryza sativa subsp. japonica OX=39947 GN=Os03g0419100 PE=2 SV=1	0.489002	3.67e-11	72.202		S	ARLARSSSIASVCSVSAADGDPSPAAPLPLL	X;X;X;X;X;X;X;X;X;X;X;X;X;X;X;X;X;X;X;X;X;X;X;X;X;X;X;X;X;X;X	XXXXXXXXXXXXXXXXXXXXXXXXXXXXXXX	S(0.005)S(0.005)S(0.004)IAS(0.008)VCS(0.489)VS(0.489)AADGDPSPAAPLPLLR	11	3	-0.34798				15898	0	0	0	0	0	0	0	0	0
sp|Q10JI3|NNJA3_ORYSJ	219	sp|Q10JI3|NNJA3_ORYSJ	sp|Q10JI3|NNJA3_ORYSJ	>sp|Q10JI3|NNJA3_ORYSJ Ninja-family protein Os03g0419100 OS=Oryza sativa subsp. japonica OX=39947 GN=Os03g0419100 PE=2 SV=1	0.740164	0.00342326	50.928	1	S	LNGTVTQQSPLRTLGSLTMRTSSTGDIGKIM	X;X;X;X;X;X;X;X;X;X;X;X;X;X;X;Phospho (STY);X;X;X;X;X;X;X;X;X;X;X;X;X;X;X	XXXXXXXXXXXXPPPPPPPPXXXXXXXXXXX	T(0.024)LGS(0.74)LT(0.236)MR	4	2	-0.34081			17065;17066;17067	17066	34860	33538	31249	25926	24967	23766	31772	30729	32407
sp|Q10JI3|NNJA3_ORYSJ;tr|A0A0P0X8E0|A0A0P0X8E0_ORYSJ;sp|Q6YVY6|NNJA2_ORYSJ	91;30;97	sp|Q10JI3|NNJA3_ORYSJ;tr|A0A0P0X8E0|A0A0P0X8E0_ORYSJ	sp|Q10JI3|NNJA3_ORYSJ	>sp|Q10JI3|NNJA3_ORYSJ Ninja-family protein Os03g0419100 OS=Oryza sativa subsp. japonica OX=39947 GN=Os03g0419100 PE=2 SV=1;>tr|A0A0P0X8E0|A0A0P0X8E0_ORYSJ Os07g0602900 protein (Fragment) OS=Oryza sativa subsp. japonica OX=39947 GN=Os07g0602900 PE=3 SV=1;>	0.989623	4.91e-05	54.716	1	S	GDPSPAAPLPLLRTSSLPTETEEERWRRREM;VATAAPAPAPLMRTSSLPTETEEERWRRREM	X;X;X;X;X;X;X;X;X;X;X;X;X;X;X;Phospho (STY);X;X;X;X;X;X;X;X;X;X;X;X;X;X;X	XXXXXXXXXXXXXPPPPPPPPPPPPXXXXXX	T(0.003)S(0.003)S(0.99)LPT(0.002)ET(0.002)EEER	3	2	0.61995			17450	17450	9977.4	9317.2	9742.1	9131.9	9004.8	9021.2	9261	9451.3	9674.8
sp|Q10L32|MSRB5_ORYSJ	22	sp|Q10L32|MSRB5_ORYSJ	sp|Q10L32|MSRB5_ORYSJ	>sp|Q10L32|MSRB5_ORYSJ Peptide methionine sulfoxide reductase B5 OS=Oryza sativa subsp. japonica OX=39947 GN=MSRB5 PE=2 SV=1	1	0.00120114	81.384	1	S	SSGKQRSDEEWRAVLSPEQFRILRLKGTELP	X;X;X;X;X;X;X;X;X;X;X;X;X;X;X;Phospho (STY);X;X;X;X;X;X;X;X;X;X;X;X;X;X;X	XXXXXXXXXXXXPPPPPPPPPXXXXXXXXXX	AVLS(1)PEQFR	4	2	2.589			2288	2288	8258.4	7854.2	7841.1	8464.1	7349.6	9224.8	8656.2	8644.8	8645.3
tr|A0A0P0VYG1|A0A0P0VYG1_ORYSJ;sp|Q10L71|VLN2_ORYSJ	301;844	tr|A0A0P0VYG1|A0A0P0VYG1_ORYSJ	tr|A0A0P0VYG1|A0A0P0VYG1_ORYSJ	>tr|A0A0P0VYG1|A0A0P0VYG1_ORYSJ Os03g0356700 protein (Fragment) OS=Oryza sativa subsp. japonica OX=39947 GN=Os03g0356700 PE=4 SV=1;>sp|Q10L71|VLN2_ORYSJ Villin-2 OS=Oryza sativa subsp. japonica OX=39947 GN=VLN2 PE=2 SV=1	0.997737	6.67e-40	135.03	1	S	VAALSNVLTAEGSSQSPRIGDADTAELTPSA	X;X;X;X;X;X;X;X;X;X;X;X;X;X;X;Phospho (STY);X;X;X;X;X;X;X;X;X;X;X;X;X;X;X	PPPPPPPPPPPPPPPPPPXXXXXXXXXXXXX	AAAVAALSNVLTAEGS(0.001)S(0.001)QS(0.998)PR	19	3	-1.821			84;85	84	2538.4	2460.9	2796.1	3043.7	2994.5	3072.8	2919	2965.3	3106.3
tr|A0A0P0VYG1|A0A0P0VYG1_ORYSJ;sp|Q10L71|VLN2_ORYSJ	244;787	tr|A0A0P0VYG1|A0A0P0VYG1_ORYSJ	tr|A0A0P0VYG1|A0A0P0VYG1_ORYSJ	>tr|A0A0P0VYG1|A0A0P0VYG1_ORYSJ Os03g0356700 protein (Fragment) OS=Oryza sativa subsp. japonica OX=39947 GN=Os03g0356700 PE=4 SV=1;>sp|Q10L71|VLN2_ORYSJ Villin-2 OS=Oryza sativa subsp. japonica OX=39947 GN=VLN2 PE=2 SV=1	0.976504	2.03e-09	87.057	1	S	FNPSSQKNKGNDRPKSSDGGPTQRASAMAAL	X;X;X;X;X;X;X;X;X;X;X;X;X;X;X;Phospho (STY);X;X;X;X;X;X;X;X;X;X;X;X;X;X;X	XXXXXXXXXPPPPPPPPPPPPPPPXXXXXXX	GNDRPKS(0.977)S(0.022)DGGPT(0.001)QR	7	3	0.37303			7075;7076;7077;7078;7079	7078	18696	17955	18223	20270	20696	21518	21813	22185	20653
tr|A0A0P0VYG1|A0A0P0VYG1_ORYSJ;sp|Q10L71|VLN2_ORYSJ	271;814	tr|A0A0P0VYG1|A0A0P0VYG1_ORYSJ	tr|A0A0P0VYG1|A0A0P0VYG1_ORYSJ	>tr|A0A0P0VYG1|A0A0P0VYG1_ORYSJ Os03g0356700 protein (Fragment) OS=Oryza sativa subsp. japonica OX=39947 GN=Os03g0356700 PE=4 SV=1;>sp|Q10L71|VLN2_ORYSJ Villin-2 OS=Oryza sativa subsp. japonica OX=39947 GN=VLN2 PE=2 SV=1	1	0.0297408	38.165	1	S	MAALTSAFNPSAKPKSPPQRAGQGSQRAAAV	X;X;X;X;X;X;X;X;X;X;X;X;X;X;X;Phospho (STY);X;X;X;X;X;X;X;X;X;X;X;X;X;X;X	XXXXXXXXXXXXXPPPPPPPXXXXXXXXXXX	PKS(1)PPQR	3	2	-0.080513			12752	12752	4152.9	3058	3999.4	3874.8	4279.5	4463.8	5419.1	4949.2	4512.8
sp|Q10LP5|SUS4_ORYSJ	11	sp|Q10LP5|SUS4_ORYSJ	sp|Q10LP5|SUS4_ORYSJ	>sp|Q10LP5|SUS4_ORYSJ Sucrose synthase 4 OS=Oryza sativa subsp. japonica OX=39947 GN=SUS4 PE=2 SV=1	0.995102	0.0183771	20.996	1	S	_____MSGPKLDRTPSIRDRVEDTLHAHRNE	X;X;X;X;X;X;X;X;X;X;X;X;X;X;X;Phospho (STY);X;X;X;X;X;X;X;X;X;X;X;X;X;X;X	XXXXXXXXXXPPPPPPPPPPXXXXXXXXXXX	LDRT(0.005)PS(0.995)IRDR	6	3	0.49908			9905	9905	7732.6	7945.2	7802.2	6742.4	7428.7	7024.4	8573.6	9308.1	9316.5
sp|Q10LX4|CML27_ORYSJ	19	sp|Q10LX4|CML27_ORYSJ	sp|Q10LX4|CML27_ORYSJ	>sp|Q10LX4|CML27_ORYSJ Probable calcium-binding protein CML27 OS=Oryza sativa subsp. japonica OX=39947 GN=CML27 PE=2 SV=1	0.99387	0.00608264	42.244	1	S	AGVAAKPSLSRKPSPSFRLRNGSLNALRLRR	X;X;X;X;X;X;X;X;X;X;X;X;X;X;X;Phospho (STY);X;X;X;X;X;X;X;X;X;X;X;X;X;X;X	XXXXXXXXXXXPPPPPPPXXXXXXXXXXXXX	KPS(0.006)PS(0.994)FR	5	3	-0.27485			9353;9354;9355	9354	29324	31654	29002	38380	37309	37962	35466	34646	33859
sp|Q10M12|40C1_ORYSJ	188	sp|Q10M12|40C1_ORYSJ	sp|Q10M12|40C1_ORYSJ	>sp|Q10M12|40C1_ORYSJ Ricin B-like lectin R40C1 OS=Oryza sativa subsp. japonica OX=39947 GN=R40C1 PE=1 SV=1	0.998165	2.16e-13	91.597	1	S	CWKILPWGDEAYAGGSANAPRGGNEPTVRIF	X;X;X;X;X;X;X;X;X;X;X;X;X;X;X;Phospho (STY);X;X;X;X;X;X;X;X;X;X;X;X;X;X;X	XXXPPPPPPPPPPPPPPPPPPXXXXXXXXXX	ILPWGDEAY(0.002)AGGS(0.998)ANAPR	13	3	-0.75499			8462;8463;8465	8465	3304.6	3490.2	3612.3	3221.8	3007.4	3256.6	4624	4942	5196.8
sp|Q10MG9|PHYB_ORYSJ;tr|A0A0P0VWK1|A0A0P0VWK1_ORYSJ	94;43	sp|Q10MG9|PHYB_ORYSJ	sp|Q10MG9|PHYB_ORYSJ	>sp|Q10MG9|PHYB_ORYSJ Phytochrome B OS=Oryza sativa subsp. japonica OX=39947 GN=PHYB PE=2 SV=1;>tr|A0A0P0VWK1|A0A0P0VWK1_ORYSJ Os03g0309200 protein (Fragment) OS=Oryza sativa subsp. japonica OX=39947 GN=Os03g0309200 PE=3 SV=1	0.96575	8.42e-19	118.84	1	S	GASGRSFDYTQSLRASPTPSSEQQIAAYLSR	X;X;X;X;X;X;X;X;X;X;X;X;X;X;X;Phospho (STY);X;X;X;X;X;X;X;X;X;X;X;X;X;X;X	XXXXXXXXXXXXXXPPPPPPPPPPPPPPPPP	AS(0.966)PT(0.034)PSSEQQIAAYLSR	2	3	0.9226			1826;1827;1828	1828	6621.3	7237.2	6739.7	6948.2	7305.5	6729.4	8648.8	7653.1	7187
sp|Q10MG9|PHYB_ORYSJ	12	sp|Q10MG9|PHYB_ORYSJ	sp|Q10MG9|PHYB_ORYSJ	>sp|Q10MG9|PHYB_ORYSJ Phytochrome B OS=Oryza sativa subsp. japonica OX=39947 GN=PHYB PE=2 SV=1	0.995486	0.000133302	64.844	1	S	____MASGSRATPTRSPSSARPAAPRHQHHH	X;X;X;X;X;X;X;X;X;X;X;X;X;X;X;Phospho (STY);X;X;X;X;X;X;X;X;X;X;X;X;X;X;X	XXXXXXXXXXPPPPPPPPPPPXXXXXXXXXX	ATPT(0.001)RS(0.995)PS(0.002)S(0.002)AR	6	2	-0.0984			2057;2058;2059;2060;2061	2058	14286	13853	14004	16705	16986	18377	17036	16801	16582
sp|Q10MG9|PHYB_ORYSJ;tr|A0A0P0VWK1|A0A0P0VWK1_ORYSJ	1087;1036	sp|Q10MG9|PHYB_ORYSJ	sp|Q10MG9|PHYB_ORYSJ	>sp|Q10MG9|PHYB_ORYSJ Phytochrome B OS=Oryza sativa subsp. japonica OX=39947 GN=PHYB PE=2 SV=1;>tr|A0A0P0VWK1|A0A0P0VWK1_ORYSJ Os03g0309200 protein (Fragment) OS=Oryza sativa subsp. japonica OX=39947 GN=Os03g0309200 PE=3 SV=1	0.99314	1.09e-07	81.198	1	S	NGWVEIQVRPNIKQNSDGTDTMLFLFRFACP	X;X;X;X;X;X;X;X;X;X;X;X;X;X;X;Phospho (STY);X;X;X;X;X;X;X;X;X;X;X;X;X;X;X	XXXXXXXXXXXXXPPPPPPPPPPPPPPXXXX	QNS(0.993)DGT(0.007)DTMLFLFR	3	3	-0.6888			13042;13043;13044;13045;13046;13047	13046	7171.1	6502	6474.2	6750.2	7543	6929	8081	7577.2	7652.4
sp|Q10MH8|RH24_ORYSJ	151	sp|Q10MH8|RH24_ORYSJ	sp|Q10MH8|RH24_ORYSJ	>sp|Q10MH8|RH24_ORYSJ DEAD-box ATP-dependent RNA helicase 24 OS=Oryza sativa subsp. japonica OX=39947 GN=Os03g0308500 PE=2 SV=1	0.956368	1.45e-08	67.756	1	S	YAAAKAVDAGMMEYDSDDNPIVVDKKKIEPI	X;X;X;X;X;X;X;X;X;X;X;X;X;X;X;Phospho (STY);X;X;X;X;X;X;X;X;X;X;X;X;X;X;X	XXXXXPPPPPPPPPPPPPPPPPPPPPXXXXX	AVDAGMMEY(0.044)DS(0.956)DDNPIVVDKK	11	4	-0.31109			2238;2239	2239	4955.2	5284.5	4635.5	4947.9	4812.6	4946.4	5065.2	5239.4	5507.8
sp|Q10MH8|RH24_ORYSJ	131	sp|Q10MH8|RH24_ORYSJ	sp|Q10MH8|RH24_ORYSJ	>sp|Q10MH8|RH24_ORYSJ DEAD-box ATP-dependent RNA helicase 24 OS=Oryza sativa subsp. japonica OX=39947 GN=Os03g0308500 PE=2 SV=1	0.999044	3.64e-21	93.444	1	S	SGLALAADAMHAGYDSDEEVYAAAKAVDAGM	X;X;X;X;X;X;X;X;X;X;X;X;X;X;X;Phospho (STY);X;X;X;X;X;X;X;X;X;X;X;X;X;X;X	PPPPPPPPPPPPPPPPPPPPPPPPPXXXXXX	DSGLALAADAMHAGY(0.001)DS(0.999)DEEVYAAAK	17	4	-0.097253			3362;3363;3364;3365;3366;3367	3367	21936	19924	20226	21181	21221	22937	21579	21001	20974
tr|A0A0P0VWW5|A0A0P0VWW5_ORYSJ;tr|Q10N33|Q10N33_ORYSJ;sp|Q10N34|PRR73_ORYSJ	115;569;569	tr|A0A0P0VWW5|A0A0P0VWW5_ORYSJ	tr|A0A0P0VWW5|A0A0P0VWW5_ORYSJ	>tr|A0A0P0VWW5|A0A0P0VWW5_ORYSJ Os03g0284100 protein OS=Oryza sativa subsp. japonica OX=39947 GN=Os03g0284100 PE=4 SV=1;>tr|Q10N33|Q10N33_ORYSJ Os03g0284100 protein OS=Oryza sativa subsp. japonica OX=39947 GN=LOC_Os03g17570 PE=4 SV=1;>sp|Q10N34|PRR73_ORYSJ	0.5	0.00244317	47.876	1	S	ATQHTSAFHPVQRQTSPANVVGKDKVDEGIA	X;X;X;X;X;X;X;X;X;X;X;X;X;X;X;X;X;X;X;X;X;X;X;X;X;X;X;X;X;X;X	XXXXXXXXXXXXXXXXXXXXXXXXXXXXXXX	QT(0.5)S(0.5)PANVVGK	3	2	-0.16671			13239	13239	2805.9	2878.4	2887.4	13540	12508	13908	3550.4	4215.3	3684.8
tr|A0A0P0VWW5|A0A0P0VWW5_ORYSJ;tr|Q10N33|Q10N33_ORYSJ;sp|Q10N34|PRR73_ORYSJ	94;548;548	tr|A0A0P0VWW5|A0A0P0VWW5_ORYSJ	tr|A0A0P0VWW5|A0A0P0VWW5_ORYSJ	>tr|A0A0P0VWW5|A0A0P0VWW5_ORYSJ Os03g0284100 protein OS=Oryza sativa subsp. japonica OX=39947 GN=Os03g0284100 PE=4 SV=1;>tr|Q10N33|Q10N33_ORYSJ Os03g0284100 protein OS=Oryza sativa subsp. japonica OX=39947 GN=LOC_Os03g17570 PE=4 SV=1;>sp|Q10N34|PRR73_ORYSJ	0.981964	0.00630406	33.416	1	S	KNAITKPSSNRGKVISPSAVKATQHTSAFHP	X;X;X;X;X;X;X;X;X;X;X;X;X;X;X;Phospho (STY);X;X;X;X;X;X;X;X;X;X;X;X;X;X;X	XXXXXXXXXXXXXPPPPPPPPXXXXXXXXXX	VIS(0.982)PS(0.018)AVK	3	2	-0.44852			18496;18497;18498	18497	24336	23237	24221	73165	73480	75891	29415	29322	29167
sp|Q10NQ3|VPS9A_ORYSJ	304	sp|Q10NQ3|VPS9A_ORYSJ	sp|Q10NQ3|VPS9A_ORYSJ	>sp|Q10NQ3|VPS9A_ORYSJ Vacuolar protein sorting-associated protein 9A OS=Oryza sativa subsp. japonica OX=39947 GN=VPS9A PE=1 SV=1	0.99578	1.09e-07	92.154	1	S	DVREQKSQTLKASRDSDVNLSLKDNFQGPGL	X;X;X;X;X;X;X;X;X;X;X;X;X;X;X;Phospho (STY);X;X;X;X;X;X;X;X;X;X;X;X;X;X;X	XXXXXXXXXXXPPPPPPPPPPPPXXXXXXXX	AS(0.004)RDS(0.996)DVNLSLK	5	2	0.036466			1843;1844;1845	1845	18502	18134	17144	29464	26380	30448	17184	17896	18083
sp|Q10NQ3|VPS9A_ORYSJ	337	sp|Q10NQ3|VPS9A_ORYSJ	sp|Q10NQ3|VPS9A_ORYSJ	>sp|Q10NQ3|VPS9A_ORYSJ Vacuolar protein sorting-associated protein 9A OS=Oryza sativa subsp. japonica OX=39947 GN=VPS9A PE=1 SV=1	0.991798	3.38e-06	50.067	1	S	RRDSDASSNPVERVQSISDLEKKGAAELLKD	X;X;X;X;X;X;X;X;X;X;X;X;X;X;X;Phospho (STY);X;X;X;X;X;X;X;X;X;X;X;X;X;X;X	XXXXXXXXXXXXXPPPPPPPPPPXXXXXXXX	VQS(0.992)IS(0.008)DLEKK	3	3	0.4732			18877;18878;18879;18880;18881;18882;18883	18883	116230	111890	110220	169330	165330	172070	124710	126950	122670
sp|Q10NQ3|VPS9A_ORYSJ	339	sp|Q10NQ3|VPS9A_ORYSJ	sp|Q10NQ3|VPS9A_ORYSJ	>sp|Q10NQ3|VPS9A_ORYSJ Vacuolar protein sorting-associated protein 9A OS=Oryza sativa subsp. japonica OX=39947 GN=VPS9A PE=1 SV=1	0.5	0.00115735	46.18	1	S	DSDASSNPVERVQSISDLEKKGAAELLKDDD	X;X;X;X;X;X;X;X;X;X;X;X;X;X;X;X;X;X;X;X;X;X;X;X;X;X;X;X;X;X;X	XXXXXXXXXXXXXXXXXXXXXXXXXXXXXXX	VQS(0.5)IS(0.5)DLEK	5	2	0.53096			18880	18880	26751	24279	23553	36117	35436	36221	26214	27412	24708
sp|Q10NY2|TPR3_ORYSJ	214	sp|Q10NY2|TPR3_ORYSJ	sp|Q10NY2|TPR3_ORYSJ	>sp|Q10NY2|TPR3_ORYSJ Protein TPR3 OS=Oryza sativa subsp. japonica OX=39947 GN=TPR3 PE=1 SV=1	1	2.52e-08	82.12	1	S	FVDHSCGQPNGARAPSPANNPLLGSIPKPGG	X;X;X;X;X;X;X;X;X;X;X;X;X;X;X;Phospho (STY);X;X;X;X;X;X;X;X;X;X;X;X;X;X;X	XXXXXXXXXXXXXPPPPPPPPPPPPPPPXXX	APS(1)PANNPLLGSIPK	3	3	-0.23229			1523;1524;1525;1526	1526	19772	20982	20120	17222	15592	17022	18043	17947	19076
sp|Q10NY2|TPR3_ORYSJ	639	sp|Q10NY2|TPR3_ORYSJ	sp|Q10NY2|TPR3_ORYSJ	>sp|Q10NY2|TPR3_ORYSJ Protein TPR3 OS=Oryza sativa subsp. japonica OX=39947 GN=TPR3 PE=1 SV=1	0.999837	7.51e-21	94.092	1	S	TSLLTTIDADGGLPASPRVRFNKEGTLLAVS	X;X;X;X;X;X;X;X;X;X;X;X;X;X;X;Phospho (STY);X;X;X;X;X;X;X;X;X;X;X;X;X;X;X	PPPPPPPPPPPPPPPPPPXXXXXXXXXXXXX	IWDMDNTSLLTTIDADGGLPAS(1)PR	22	3	-0.27433			8861;8862;8863	8861	379.25	509.3	577.9	947.47	740.56	726.11	448.87	927.76	828.16
sp|Q10P83|ACBP5_ORYSJ	440	sp|Q10P83|ACBP5_ORYSJ	sp|Q10P83|ACBP5_ORYSJ	>sp|Q10P83|ACBP5_ORYSJ Acyl-CoA-binding domain-containing protein 5 OS=Oryza sativa subsp. japonica OX=39947 GN=ACBP5 PE=2 SV=1	1	6e-07	64.023	1	S	FASSDAGMAALSKLDSDVQLQLQGLLKVAID	X;X;X;X;X;X;X;X;X;X;X;X;X;X;X;Phospho (STY);X;X;X;X;X;X;X;X;X;X;X;X;X;X;X	XXXXXXXXXXXXXPPPPPPPPPPPPPPXXXX	LDS(1)DVQLQLQGLLK	3	3	-0.59225			9906;9907	9907	1126.1	1142.6	847.73	1275.3	1348	1478.2	1264	1768.7	1765.3
sp|Q10PP8|MTP4_ORYSJ	21	sp|Q10PP8|MTP4_ORYSJ	sp|Q10PP8|MTP4_ORYSJ	>sp|Q10PP8|MTP4_ORYSJ Metal tolerance protein 4 OS=Oryza sativa subsp. japonica OX=39947 GN=MTP4 PE=2 SV=1	0.999976	0.000741081	93.273	1	S	ENDARAPLLAERRRNSVGSMRGEFVSRLPKK	X;X;X;X;X;X;X;X;X;X;X;X;X;X;X;Phospho (STY);X;X;X;X;X;X;X;X;X;X;X;X;X;X;X	XXXXXXXXXXXXXPPPPPPPPXXXXXXXXXX	RNS(1)VGSMR	3	2	0.080812			12505;12506;13656;13657;13658;13659;13660	13656	46089	44680	43747	32402	32423	33409	51499	52717	55198
tr|A0A0P0VUP5|A0A0P0VUP5_ORYSJ;sp|Q10Q07|NNJA1_ORYSJ	58;58	tr|A0A0P0VUP5|A0A0P0VUP5_ORYSJ	tr|A0A0P0VUP5|A0A0P0VUP5_ORYSJ	>tr|A0A0P0VUP5|A0A0P0VUP5_ORYSJ Os03g0214200 protein OS=Oryza sativa subsp. japonica OX=39947 GN=Os03g0214200 PE=4 SV=1;>sp|Q10Q07|NNJA1_ORYSJ Ninja-family protein MODD OS=Oryza sativa subsp. japonica OX=39947 GN=MODD PE=1 SV=1	0.333331	6.03e-06	47.164		S	GGRFGLDRRGEKLARSSSVAAILAAPTEPSA	X;X;X;X;X;X;X;X;X;X;X;X;X;X;X;Phospho (STY);X;X;X;X;X;X;X;X;X;X;X;X;X;X;X	XXXXXXXXXXXXXXXPPPPPPPPPPPPPPPP	S(0.333)S(0.333)S(0.333)VAAILAAPTEPSAPPSGLFR	1	3	0.22379				15962	0	0	0	0	0	0	0	0	0
tr|A0A0P0VUP5|A0A0P0VUP5_ORYSJ;sp|Q10Q07|NNJA1_ORYSJ	59;59	tr|A0A0P0VUP5|A0A0P0VUP5_ORYSJ	tr|A0A0P0VUP5|A0A0P0VUP5_ORYSJ	>tr|A0A0P0VUP5|A0A0P0VUP5_ORYSJ Os03g0214200 protein OS=Oryza sativa subsp. japonica OX=39947 GN=Os03g0214200 PE=4 SV=1;>sp|Q10Q07|NNJA1_ORYSJ Ninja-family protein MODD OS=Oryza sativa subsp. japonica OX=39947 GN=MODD PE=1 SV=1	0.333331	6.03e-06	47.164		S	GRFGLDRRGEKLARSSSVAAILAAPTEPSAP	X;X;X;X;X;X;X;X;X;X;X;X;X;X;X;X;X;X;X;X;X;X;X;X;X;X;X;X;X;X;X	XXXXXXXXXXXXXXXXXXXXXXXXXXXXXXX	S(0.333)S(0.333)S(0.333)VAAILAAPTEPSAPPSGLFR	2	3	0.22379				15962	0	0	0	0	0	0	0	0	0
tr|A0A0P0VUP5|A0A0P0VUP5_ORYSJ;sp|Q10Q07|NNJA1_ORYSJ	60;60	tr|A0A0P0VUP5|A0A0P0VUP5_ORYSJ	tr|A0A0P0VUP5|A0A0P0VUP5_ORYSJ	>tr|A0A0P0VUP5|A0A0P0VUP5_ORYSJ Os03g0214200 protein OS=Oryza sativa subsp. japonica OX=39947 GN=Os03g0214200 PE=4 SV=1;>sp|Q10Q07|NNJA1_ORYSJ Ninja-family protein MODD OS=Oryza sativa subsp. japonica OX=39947 GN=MODD PE=1 SV=1	0.333331	6.03e-06	47.164		S	RFGLDRRGEKLARSSSVAAILAAPTEPSAPP	X;X;X;X;X;X;X;X;X;X;X;X;X;X;X;X;X;X;X;X;X;X;X;X;X;X;X;X;X;X;X	XXXXXXXXXXXXXXXXXXXXXXXXXXXXXXX	S(0.333)S(0.333)S(0.333)VAAILAAPTEPSAPPSGLFR	3	3	0.22379				15962	0	0	0	0	0	0	0	0	0
tr|A0A0P0VUP5|A0A0P0VUP5_ORYSJ;sp|Q10Q07|NNJA1_ORYSJ	82;82	tr|A0A0P0VUP5|A0A0P0VUP5_ORYSJ	tr|A0A0P0VUP5|A0A0P0VUP5_ORYSJ	>tr|A0A0P0VUP5|A0A0P0VUP5_ORYSJ Os03g0214200 protein OS=Oryza sativa subsp. japonica OX=39947 GN=Os03g0214200 PE=4 SV=1;>sp|Q10Q07|NNJA1_ORYSJ Ninja-family protein MODD OS=Oryza sativa subsp. japonica OX=39947 GN=MODD PE=1 SV=1	0.327516	9.05e-05	45.612		S	APTEPSAPPSGLFRTSSLPTVAAAEAAKKQG	X;X;X;X;X;X;X;X;X;X;X;X;X;X;X;X;X;X;X;X;X;X;X;X;X;X;X;X;X;X;X	XXXXXXXXXXXXXXXXXXXXXXXXXXXXXXX	T(0.328)S(0.328)S(0.27)LPT(0.075)VAAAEAAK	2	3	2.061				17453	0	0	0	0	0	0	0	0	0
tr|A0A0P0VUP5|A0A0P0VUP5_ORYSJ;sp|Q10Q07|NNJA1_ORYSJ	83;83	tr|A0A0P0VUP5|A0A0P0VUP5_ORYSJ	tr|A0A0P0VUP5|A0A0P0VUP5_ORYSJ	>tr|A0A0P0VUP5|A0A0P0VUP5_ORYSJ Os03g0214200 protein OS=Oryza sativa subsp. japonica OX=39947 GN=Os03g0214200 PE=4 SV=1;>sp|Q10Q07|NNJA1_ORYSJ Ninja-family protein MODD OS=Oryza sativa subsp. japonica OX=39947 GN=MODD PE=1 SV=1	0.685032	5.82e-08	79.324	1	S	PTEPSAPPSGLFRTSSLPTVAAAEAAKKQGV	X;X;X;X;X;X;X;X;X;X;X;X;X;X;X;Phospho (STY);X;X;X;X;X;X;X;X;X;X;X;X;X;X;X	XXXXXXXXXXXXXPPPPPPPPPPPPPPXXXX	T(0.152)S(0.152)S(0.685)LPT(0.01)VAAAEAAK	3	3	0.80195			17451;17452	17451	15883	15379	14536	12444	11600	12259	14030	13602	13743
tr|A0A0P0VTN8|A0A0P0VTN8_ORYSJ;sp|Q10R54|SUT1_ORYSJ	277;531	tr|A0A0P0VTN8|A0A0P0VTN8_ORYSJ	tr|A0A0P0VTN8|A0A0P0VTN8_ORYSJ	>tr|A0A0P0VTN8|A0A0P0VTN8_ORYSJ Os03g0170900 protein (Fragment) OS=Oryza sativa subsp. japonica OX=39947 GN=Os03g0170900 PE=4 SV=1;>sp|Q10R54|SUT1_ORYSJ Sucrose transport protein SUT1 OS=Oryza sativa subsp. japonica OX=39947 GN=SUT1 PE=1 SV=1	0.62588	0.0289401	46.912	1	S	AGIFLLPKISKRQFRSVSMGGGH________	X;X;X;X;X;X;X;X;X;X;X;X;X;X;X;Phospho (STY);X;X;X;X;X;X;X;X;X;X;X;X;X;X;X	XXXXXXXXXXXXXXXPPPPPPPPXXXXXXXX	S(0.626)VS(0.374)MGGGH	1	2	-0.23597			16264	16264	15526	13856	13927	12437	12393	12940	14009	15126	15132
tr|A0A0P0VTN8|A0A0P0VTN8_ORYSJ;sp|Q10R54|SUT1_ORYSJ	279;533	tr|A0A0P0VTN8|A0A0P0VTN8_ORYSJ	tr|A0A0P0VTN8|A0A0P0VTN8_ORYSJ	>tr|A0A0P0VTN8|A0A0P0VTN8_ORYSJ Os03g0170900 protein (Fragment) OS=Oryza sativa subsp. japonica OX=39947 GN=Os03g0170900 PE=4 SV=1;>sp|Q10R54|SUT1_ORYSJ Sucrose transport protein SUT1 OS=Oryza sativa subsp. japonica OX=39947 GN=SUT1 PE=1 SV=1	0.918033	0.0145899	58.225	1	S	IFLLPKISKRQFRSVSMGGGH__________	X;X;X;X;X;X;X;X;X;X;X;X;X;X;X;Phospho (STY);X;X;X;X;X;X;X;X;X;X;X;X;X;X;X	XXXXXXXXXXXXXPPPPPPPPXXXXXXXXXX	S(0.082)VS(0.918)MGGGH	3	2	-0.14484			16265;16266	16266	21336	20068	20360	16532	16330	18629	19794	19241	19944
tr|A0A0P0YD65|A0A0P0YD65_ORYSJ;sp|Q2QM47|BSL2_ORYSJ	618;618	tr|A0A0P0YD65|A0A0P0YD65_ORYSJ	tr|A0A0P0YD65|A0A0P0YD65_ORYSJ	>tr|A0A0P0YD65|A0A0P0YD65_ORYSJ Serine/threonine-protein phosphatase (Fragment) OS=Oryza sativa subsp. japonica OX=39947 GN=Os12g0617900 PE=3 SV=1;>sp|Q2QM47|BSL2_ORYSJ Serine/threonine-protein phosphatase BSL2 homolog OS=Oryza sativa subsp. japonica OX=39	1	1.04e-11	102.08	1	S	AAETGGALGGMVRQLSIDQFENEGRRVIYGT	X;X;X;X;X;X;X;X;X;X;X;X;X;X;X;Phospho (STY);X;X;X;X;X;X;X;X;X;X;X;X;X;X;X	XXXXXXXXXXXXXPPPPPPPPPPPPPXXXXX	QLS(1)IDQFENEGRR	3	3	-0.32371			12996;12997;12998;12999;13000;13001;13002;13003	13003	50382	50871	46401	44379	42429	45766	55432	56881	56710
tr|A0A0P0YD65|A0A0P0YD65_ORYSJ;sp|Q2QM47|BSL2_ORYSJ;tr|A0A0N7KHQ6|A0A0N7KHQ6_ORYSJ	649;649;33	tr|A0A0P0YD65|A0A0P0YD65_ORYSJ	tr|A0A0P0YD65|A0A0P0YD65_ORYSJ	>tr|A0A0P0YD65|A0A0P0YD65_ORYSJ Serine/threonine-protein phosphatase (Fragment) OS=Oryza sativa subsp. japonica OX=39947 GN=Os12g0617900 PE=3 SV=1;>sp|Q2QM47|BSL2_ORYSJ Serine/threonine-protein phosphatase BSL2 homolog OS=Oryza sativa subsp. japonica OX=39	0.984092	0.00260383	63.561	1	S	PESATAARKLLDRQMSINSVPKKVIASLLKP	X;X;X;X;X;X;X;X;X;X;X;X;X;X;X;Phospho (STY);X;X;X;X;X;X;X;X;X;X;X;X;X;X;X	XXXXXXXXXXXXXPPPPPPPPPXXXXXXXXX	QMS(0.984)INS(0.016)VPK	3	3	-0.32866			13034;13035;13036;13037;13038	13035	45701	47967	45316	40461	39840	40867	51898	51129	50758
sp|Q2QNG7|ACLA3_ORYSJ	248	sp|Q2QNG7|ACLA3_ORYSJ	sp|Q2QNG7|ACLA3_ORYSJ	>sp|Q2QNG7|ACLA3_ORYSJ ATP-citrate synthase alpha chain protein 3 OS=Oryza sativa subsp. japonica OX=39947 GN=ACLA-3 PE=2 SV=1	0.992187	5.74e-12	81.442	1	S	IQFPLPFGRVLSPSESFIHELDEKTSSSLKF	X;X;X;X;X;X;X;X;X;X;X;X;X;X;X;Phospho (STY);X;X;X;X;X;X;X;X;X;X;X;X;X;X;X	XXXXXXXXXPPPPPPPPPPPPPPPXXXXXXX	VLSPS(0.007)ES(0.992)FIHELDEK	7	3	-0.19227			18632;18633;18634;18635	18633	10391	10218	10973	8676.4	9752	10177	11322	12191	11661
sp|Q2QNU0|TR130_ORYSJ	514	sp|Q2QNU0|TR130_ORYSJ	sp|Q2QNU0|TR130_ORYSJ	>sp|Q2QNU0|TR130_ORYSJ Trafficking protein particle complex II-specific subunit 130 homolog OS=Oryza sativa subsp. japonica OX=39947 GN=TRS130 PE=2 SV=1	0.882558	7.7e-14	91.208	1	S	PSPNKSASNYMARTMSGPATSETSLPVDRPM	X;X;X;X;X;X;X;X;X;X;X;X;X;X;X;Phospho (STY);X;X;X;X;X;X;X;X;X;X;X;X;X;X;X	XXXXXXXXXXXXXPPPPPPPPPPPPPPPPPP	T(0.05)MS(0.883)GPAT(0.057)S(0.008)ET(0.001)S(0.002)LPVDRPMR	3	3	-2.3955			17158;17159	17158	10622	10975	10285	9478.9	9005.4	9260.5	11674	12143	12853
sp|Q2QPW2|C3H67_ORYSJ	469	sp|Q2QPW2|C3H67_ORYSJ	sp|Q2QPW2|C3H67_ORYSJ	>sp|Q2QPW2|C3H67_ORYSJ Zinc finger CCCH domain-containing protein 67 OS=Oryza sativa subsp. japonica OX=39947 GN=Os12g0515500 PE=2 SV=1	0.966054	1.14e-07	40.334	1	S	SLLSPRAAAVTPEPVSPMSSRLLAALAQREK	X;X;X;X;X;X;X;X;X;X;X;X;X;X;X;Phospho (STY);X;X;X;X;X;X;X;X;X;X;X;X;X;X;X	XXXXXXPPPPPPPPPPPPPPPXXXXXXXXXX	AAAVT(0.01)PEPVS(0.966)PMS(0.012)S(0.012)R	10	2	1.8309			118;119	119	6289.4	6789.8	5205.2	7109.2	6526.2	7378	7050.9	6972.4	5731.3
sp|Q2QPW2|C3H67_ORYSJ	422	sp|Q2QPW2|C3H67_ORYSJ	sp|Q2QPW2|C3H67_ORYSJ	>sp|Q2QPW2|C3H67_ORYSJ Zinc finger CCCH domain-containing protein 67 OS=Oryza sativa subsp. japonica OX=39947 GN=Os12g0515500 PE=2 SV=1	0.499668	1.04e-06	53.456		S	NLDELFSAELAAAAASRSPRYADQGGAAFSP	X;X;X;X;X;X;X;X;X;X;X;X;X;X;X;Phospho (STY);X;X;X;X;X;X;X;X;X;X;X;X;X;Phospho (STY);X	PPPPPPPPPPPPPPPPPPPPXXXXXXXXXXX	ALVPSNLDELFS(0.001)AELAAAAAS(0.5)RS(0.5)PR	21	3	-0.5262				1295	0	0	0	0	0	0	0	0	0
sp|Q2QPW2|C3H67_ORYSJ	424	sp|Q2QPW2|C3H67_ORYSJ	sp|Q2QPW2|C3H67_ORYSJ	>sp|Q2QPW2|C3H67_ORYSJ Zinc finger CCCH domain-containing protein 67 OS=Oryza sativa subsp. japonica OX=39947 GN=Os12g0515500 PE=2 SV=1	0.499668	1.04e-06	53.456		S	DELFSAELAAAAASRSPRYADQGGAAFSPTR	X;X;X;X;X;X;X;X;X;X;X;X;X;X;X;X;X;X;X;X;X;X;X;X;X;X;X;Phospho (STY);X;X;X	XXXXXXXXXXXXXXXXXXXXXXXXXXXXXXX	ALVPSNLDELFS(0.001)AELAAAAAS(0.5)RS(0.5)PR	23	3	-0.5262				1295	0	0	0	0	0	0	0	0	0
sp|Q2QPW2|C3H67_ORYSJ	508	sp|Q2QPW2|C3H67_ORYSJ	sp|Q2QPW2|C3H67_ORYSJ	>sp|Q2QPW2|C3H67_ORYSJ Zinc finger CCCH domain-containing protein 67 OS=Oryza sativa subsp. japonica OX=39947 GN=Os12g0515500 PE=2 SV=1	0.889855	5.25e-07	57.753	1	S	MSSRDLGNAASLLVGSPVSSSMSKWGFPSGN	X;X;X;X;X;X;X;X;X;X;X;X;X;X;X;Phospho (STY);X;X;X;X;X;X;X;X;X;X;X;X;X;X;X	XXXXPPPPPPPPPPPPPPPPPPPPXXXXXXX	DLGNAASLLVGS(0.89)PVS(0.081)S(0.022)S(0.006)MS(0.001)K	12	3	1.492			3086	3086	864.14	1282.7	969.58	1308.3	1142.1	1094.1	1066.4	1096.4	889.58
sp|Q2QPW2|C3H67_ORYSJ;tr|A0A0P0XZW9|A0A0P0XZW9_ORYSJ	436;132	sp|Q2QPW2|C3H67_ORYSJ	sp|Q2QPW2|C3H67_ORYSJ	>sp|Q2QPW2|C3H67_ORYSJ Zinc finger CCCH domain-containing protein 67 OS=Oryza sativa subsp. japonica OX=39947 GN=Os12g0515500 PE=2 SV=1;>tr|A0A0P0XZW9|A0A0P0XZW9_ORYSJ Os11g0209050 protein OS=Oryza sativa subsp. japonica OX=39947 GN=Os11g0209050 PE=4 SV=1	0.968489	0.000110689	56.334	1	S	ASRSPRYADQGGAAFSPTRKATVLNQFQLQQ	X;Phospho (STY);X;X;X;X;X;X;X;X;X;X;X;X;X;Phospho (STY);X;X;X;X;X;X;X;X;X;X;X;X;X;X;X	XXXXXXPPPPPPPPPPPPPXXXXXXXXXXXX	YADQGGAAFS(0.968)PT(0.032)R	10	2	0.89145			19604;19605	19604	11012	10421	10184	11840	12235	12232	10823	10672	10354
sp|Q2QS13|UGDH5_ORYSJ	393	sp|Q2QS13|UGDH5_ORYSJ	sp|Q2QS13|UGDH5_ORYSJ	>sp|Q2QS13|UGDH5_ORYSJ UDP-glucose 6-dehydrogenase 5 OS=Oryza sativa subsp. japonica OX=39947 GN=UGD5 PE=2 SV=1	0.88311	6.89e-05	80.636	1	S	MAKFDWDHPRHLQPTSPTAFKQVSVVWDAYE	X;X;X;X;X;X;X;X;X;X;X;X;X;X;X;Phospho (STY);X;X;X;X;X;X;X;X;X;X;X;X;X;X;X	XXXXXXXXXXPPPPPPPPPPPXXXXXXXXXX	HLQPT(0.116)S(0.883)PT(0.001)AFK	6	3	-0.13693			7834;7836	7834	12706	12135	12116	10438	9654	10610	13118	13298	13390
sp|Q9AUV6|UGDH3_ORYSJ;sp|Q2QS14|UGDH4_ORYSJ	393;393	sp|Q9AUV6|UGDH3_ORYSJ	sp|Q9AUV6|UGDH3_ORYSJ	>sp|Q9AUV6|UGDH3_ORYSJ UDP-glucose 6-dehydrogenase 3 OS=Oryza sativa subsp. japonica OX=39947 GN=UGD3 PE=2 SV=1;>sp|Q2QS14|UGDH4_ORYSJ UDP-glucose 6-dehydrogenase 4 OS=Oryza sativa subsp. japonica OX=39947 GN=UGD4 PE=2 SV=1	0.796976	1.19e-11	81.664	1	S	MGKFDWDHPMHLQPTSPTAFKQVSVVWDAYE	X;X;X;X;X;X;X;X;X;Oxidation (M);X;X;X;X;X;Phospho (STY);X;X;X;X;X;X;X;X;X;X;X;X;X;X;X	XXXPPPPPPPPPPPPPPPPPPXXXXXXXXXX	FDWDHPMHLQPT(0.182)S(0.797)PT(0.021)AFK	13	4	-0.6165			5299;5300;5303;5309;5310;5311;5312	5310	41904	43896	40903	32721	33577	32929	50144	50033	51475
sp|Q2QT65|C3H66_ORYSJ	398	sp|Q2QT65|C3H66_ORYSJ	sp|Q2QT65|C3H66_ORYSJ	>sp|Q2QT65|C3H66_ORYSJ Zinc finger CCCH domain-containing protein 66 OS=Oryza sativa subsp. japonica OX=39947 GN=Os12g0405100 PE=2 SV=1	0.416475	1.48e-06	53.717		S	PNCKFDHPMGTLMYGSATSPRGDVSSMHYQL	X;X;X;X;X;X;X;X;Oxidation (M);X;X;X;X;X;X;Phospho (STY);X;X;X;X;X;X;X;X;X;X;X;X;X;X;X	XXXXPPPPPPPPPPPPPPPPPXXXXXXXXXX	FDHPMGTLMY(0.005)GS(0.416)AT(0.289)S(0.289)PR	12	3	-0.87107				5232	0	0	0	0	0	0	0	0	0
sp|Q2QT65|C3H66_ORYSJ	401	sp|Q2QT65|C3H66_ORYSJ	sp|Q2QT65|C3H66_ORYSJ	>sp|Q2QT65|C3H66_ORYSJ Zinc finger CCCH domain-containing protein 66 OS=Oryza sativa subsp. japonica OX=39947 GN=Os12g0405100 PE=2 SV=1	0.868983	5.07e-13	92.402	1	S	KFDHPMGTLMYGSATSPRGDVSSMHYQLSPS	X;X;X;X;X;Oxidation (M);X;X;X;Oxidation (M);X;X;X;X;X;Phospho (STY);X;X;X;X;X;X;X;X;X;X;X;X;X;X;X	XPPPPPPPPPPPPPPPPPXXXXXXXXXXXXX	FDHPMGT(0.005)LMYGS(0.048)AT(0.079)S(0.869)PR	15	2	0.23567			5233;5234;5236;5237;5238;5240	5238	29008	28563	27728	23570	22134	24965	25469	25243	25601
sp|Q2QT65|C3H66_ORYSJ;tr|A0A0P0Y253|A0A0P0Y253_ORYSJ;sp|Q2R4J4|C3H63_ORYSJ	223;183;213	sp|Q2QT65|C3H66_ORYSJ;tr|A0A0P0Y253|A0A0P0Y253_ORYSJ	tr|A0A0P0Y253|A0A0P0Y253_ORYSJ	>sp|Q2QT65|C3H66_ORYSJ Zinc finger CCCH domain-containing protein 66 OS=Oryza sativa subsp. japonica OX=39947 GN=Os12g0405100 PE=2 SV=1;>tr|A0A0P0Y253|A0A0P0Y253_ORYSJ Os11g0472000 protein (Fragment) OS=Oryza sativa subsp. japonica OX=39947 GN=Os11g0472000	0.533431	0.00901503	25.226	1	S	QHTYPGAVTNWPLSRSASFIASPRWPGHSSY;QHTYPGAVTNWTLSRSASFIASPRWPGHSGY	X;X;X;X;X;X;X;X;X;X;X;X;X;X;X;Phospho (STY);X;X;X;X;X;X;X;X;X;X;X;X;X;X;X	XXXXXXXXXXXXXXXPPPPPPPPPXXXXXXX	S(0.533)AS(0.466)FIASPR	1	3	-0.04578			14180	14180	2861.5	2767.9	3204.9	2746.5	2640.2	2840.5	3293.2	2948	3176.8
sp|Q2QT65|C3H66_ORYSJ;tr|A0A0P0Y253|A0A0P0Y253_ORYSJ;sp|Q2R4J4|C3H63_ORYSJ	225;185;215	sp|Q2QT65|C3H66_ORYSJ;tr|A0A0P0Y253|A0A0P0Y253_ORYSJ	tr|A0A0P0Y253|A0A0P0Y253_ORYSJ	>sp|Q2QT65|C3H66_ORYSJ Zinc finger CCCH domain-containing protein 66 OS=Oryza sativa subsp. japonica OX=39947 GN=Os12g0405100 PE=2 SV=1;>tr|A0A0P0Y253|A0A0P0Y253_ORYSJ Os11g0472000 protein (Fragment) OS=Oryza sativa subsp. japonica OX=39947 GN=Os11g0472000	0.998031	0.000365776	64.883	1;2	S	TYPGAVTNWPLSRSASFIASPRWPGHSSYAQ;TYPGAVTNWTLSRSASFIASPRWPGHSGYAQ	X;X;X;X;X;X;X;X;X;X;X;X;X;X;X;Phospho (STY);X;X;X;Phospho (STY);X;X;X;X;X;X;X;X;X;X;X	XXXXXXXXXXXXXPPPPPPPPPXXXXXXXXX	S(0.002)AS(0.998)FIAS(1)PR	3	2	-0.011264			14178;14179;14182;14183;14186;14187;14188;14189;14190;14191	14190	90708	86121	85244	72029	72960	73399	87840	89736	90503
sp|Q2QT65|C3H66_ORYSJ;tr|A0A0P0Y253|A0A0P0Y253_ORYSJ;sp|Q2R4J4|C3H63_ORYSJ	229;189;219	sp|Q2QT65|C3H66_ORYSJ;tr|A0A0P0Y253|A0A0P0Y253_ORYSJ	tr|A0A0P0Y253|A0A0P0Y253_ORYSJ	>sp|Q2QT65|C3H66_ORYSJ Zinc finger CCCH domain-containing protein 66 OS=Oryza sativa subsp. japonica OX=39947 GN=Os12g0405100 PE=2 SV=1;>tr|A0A0P0Y253|A0A0P0Y253_ORYSJ Os11g0472000 protein (Fragment) OS=Oryza sativa subsp. japonica OX=39947 GN=Os11g0472000	1	0.000365776	77.696	1;2	S	AVTNWPLSRSASFIASPRWPGHSSYAQVIVP;AVTNWTLSRSASFIASPRWPGHSGYAQVIVP	X;X;X;X;X;X;X;X;X;X;X;Phospho (STY);X;X;X;Phospho (STY);X;X;X;X;X;X;X;X;X;X;X;X;X;X;X	XXXXXXXXXPPPPPPPPPXXXXXXXXXXXXX	S(0.005)AS(0.995)FIAS(1)PR	7	2	-1.7111			14177;14181;14184;14185;14189;14190;14191	14191	74408	73915	72394	67428	63600	65231	64136	62862	64241
tr|A0A0P0Y9F7|A0A0P0Y9F7_ORYSJ;sp|Q2QTC2|PWD_ORYSJ	215;937	tr|A0A0P0Y9F7|A0A0P0Y9F7_ORYSJ	tr|A0A0P0Y9F7|A0A0P0Y9F7_ORYSJ	>tr|A0A0P0Y9F7|A0A0P0Y9F7_ORYSJ Os12g0297500 protein (Fragment) OS=Oryza sativa subsp. japonica OX=39947 GN=Os12g0297500 PE=3 SV=1;>sp|Q2QTC2|PWD_ORYSJ Phosphoglucan, water dikinase, chloroplastic OS=Oryza sativa subsp. japonica OX=39947 GN=GWD3 PE=3 SV=2	0.4982	0.00250011	32.593		S	GAVIPFGSMEDALKKSGSLESFTSLLEKIET	X;X;X;X;X;X;X;X;X;X;X;X;X;X;X;Phospho (STY);X;X;X;X;X;X;X;X;X;X;X;X;X;X;X	XXXXXXXXXXXXXXXPPPPPPPPPPPPPXXX	S(0.498)GS(0.498)LES(0.003)FT(0.001)SLLEK	1	3	-0.63147				14775	0	0	0	0	0	0	0	0	0
tr|A0A0P0Y9F7|A0A0P0Y9F7_ORYSJ;sp|Q2QTC2|PWD_ORYSJ	217;939	tr|A0A0P0Y9F7|A0A0P0Y9F7_ORYSJ	tr|A0A0P0Y9F7|A0A0P0Y9F7_ORYSJ	>tr|A0A0P0Y9F7|A0A0P0Y9F7_ORYSJ Os12g0297500 protein (Fragment) OS=Oryza sativa subsp. japonica OX=39947 GN=Os12g0297500 PE=3 SV=1;>sp|Q2QTC2|PWD_ORYSJ Phosphoglucan, water dikinase, chloroplastic OS=Oryza sativa subsp. japonica OX=39947 GN=GWD3 PE=3 SV=2	0.4982	0.00250011	32.593		S	VIPFGSMEDALKKSGSLESFTSLLEKIETAK	X;X;X;X;X;X;X;X;X;X;X;X;X;X;X;X;X;X;X;X;X;X;X;X;X;X;X;X;X;X;X	XXXXXXXXXXXXXXXXXXXXXXXXXXXXXXX	S(0.498)GS(0.498)LES(0.003)FT(0.001)SLLEK	3	3	-0.63147				14775	0	0	0	0	0	0	0	0	0
sp|Q2QV94|EXOC5_ORYSJ	3	sp|Q2QV94|EXOC5_ORYSJ	sp|Q2QV94|EXOC5_ORYSJ	>sp|Q2QV94|EXOC5_ORYSJ Exocyst complex component 5 OS=Oryza sativa subsp. japonica OX=39947 GN=SEC10 PE=2 SV=1	0.941753	5.41e-13	77.084	1	S	_____________MPSATDPPAALPLTLDLD	X;X;X;X;X;X;X;X;X;X;X;X;X;X;X;Phospho (STY);X;X;X;X;X;X;X;X;X;X;X;X;X;X;X	XXXXXXXXXXXXXXPPPPPPPPPPPPPPPPP	PS(0.942)AT(0.058)DPPAALPLTLDLDDFK	2	3	0.4426			12760;12761;12762	12762	2703	1746.3	2388.8	1907.5	2547.5	2080.4	3011.7	2997.9	3017.6
sp|Q2QW44|ZHD3_ORYSJ	47	sp|Q2QW44|ZHD3_ORYSJ	sp|Q2QW44|ZHD3_ORYSJ	>sp|Q2QW44|ZHD3_ORYSJ Zinc-finger homeodomain protein 3 OS=Oryza sativa subsp. japonica OX=39947 GN=ZHD3 PE=3 SV=3	1	2.99e-15	96.63	1;2	S	HGGGGGGGGMNGRHMSPPTPPAAAEESKAVV	X;X;X;X;X;X;X;X;X;X;X;X;X;X;Oxidation (M);Phospho (STY);X;X;Phospho (STY);X;X;X;X;X;X;X;X;X;X;X;X	XXXXXXXXXXXXXPPPPPPPPPPPPPPPXXX	HMS(1)PPT(1)PPAAAEESK	3	3	-0.030956			7841;7842;7843;7844;7845;7846;7847;7848;7849	7847	71636	72633	68320	71085	69245	71378	70532	67239	63301
sp|Q2QWK9|TPS1_ORYSJ	237	sp|Q2QWK9|TPS1_ORYSJ	sp|Q2QWK9|TPS1_ORYSJ	>sp|Q2QWK9|TPS1_ORYSJ Probable thiamine biosynthetic bifunctional enzyme, chloroplastic OS=Oryza sativa subsp. japonica OX=39947 GN=Os12g0192500 PE=2 SV=2	0.540891	7.31e-05	47.978	1	S	GPKHVLVKGGDMLESSDATDVFFDGKEFIEL	X;X;X;X;X;X;X;X;X;X;X;X;X;X;X;Phospho (STY);X;X;X;X;X;X;X;X;X;X;X;X;X;X;X	XXXXXXXXPPPPPPPPPPPPPPPPPPXXXXX	GGDMLES(0.133)S(0.541)DAT(0.326)DVFFDGK	8	3	0.32683			6341	6341	1351.9	1478.7	1255.2	1412.6	1376	1694.8	1376.7	1245.5	1280.8
sp|Q2QWT4|DPNP_ORYSJ;tr|A0A0N7KTP2|A0A0N7KTP2_ORYSJ	356;198	sp|Q2QWT4|DPNP_ORYSJ	sp|Q2QWT4|DPNP_ORYSJ	>sp|Q2QWT4|DPNP_ORYSJ 3'(2'),5'-bisphosphate nucleotidase OS=Oryza sativa subsp. japonica OX=39947 GN=Os12g0183300 PE=2 SV=1;>tr|A0A0N7KTP2|A0A0N7KTP2_ORYSJ Os12g0183300 protein (Fragment) OS=Oryza sativa subsp. japonica OX=39947 GN=Os12g0183300 PE=3 SV=1	1	1.71e-08	91.752	1	S	LKAVQDAIKEQNQAASPL_____________	X;X;X;X;X;X;X;X;X;X;X;X;X;X;X;Phospho (STY);X;X;X;X;X;X;X;X;X;X;X;X;X;X;X	XXPPPPPPPPPPPPPPPPXXXXXXXXXXXXX	EQNQAAS(1)PL	7	2	0.20433			2315;2316;2317;2318;4740;4741;4742;4743	4742	51099	50094	47682	54221	50446	52018	51443	51979	53538
sp|Q2QWT4|DPNP_ORYSJ;tr|A0A0N7KTP2|A0A0N7KTP2_ORYSJ	234;76	sp|Q2QWT4|DPNP_ORYSJ	sp|Q2QWT4|DPNP_ORYSJ	>sp|Q2QWT4|DPNP_ORYSJ 3'(2'),5'-bisphosphate nucleotidase OS=Oryza sativa subsp. japonica OX=39947 GN=Os12g0183300 PE=2 SV=1;>tr|A0A0N7KTP2|A0A0N7KTP2_ORYSJ Os12g0183300 protein (Fragment) OS=Oryza sativa subsp. japonica OX=39947 GN=Os12g0183300 PE=3 SV=1	0.609833	5.58e-06	44.026	1	S	SVCSIDNPVEASFFESYEGAHSLRDLTGSIA	X;X;X;X;X;X;X;X;X;X;X;X;X;X;X;Phospho (STY);X;X;X;X;X;X;X;X;X;X;X;X;X;X;X	PPPPPPPPPPPPPPPPPPPPPPPPXXXXXXX	ISVCSIDNPVEAS(0.026)FFES(0.61)YEGAHS(0.364)LR	17	3	0.073429			8707	8707	1352.4	1517.6	1339.1	1284	1261.7	1233.2	1511.3	1411.6	1507
tr|A0A0P0Y5T3|A0A0P0Y5T3_ORYSJ;tr|A0A0N7KTF2|A0A0N7KTF2_ORYSJ;sp|Q2RBR1|PHT1B_ORYSJ;sp|Q2QYY8|PHT1A_ORYSJ	273;20;273;273	tr|A0A0P0Y5T3|A0A0P0Y5T3_ORYSJ	tr|A0A0P0Y5T3|A0A0P0Y5T3_ORYSJ	>tr|A0A0P0Y5T3|A0A0P0Y5T3_ORYSJ Os12g0101800 protein OS=Oryza sativa subsp. japonica OX=39947 GN=Os12g0101800 PE=4 SV=1;>tr|A0A0N7KTF2|A0A0N7KTF2_ORYSJ Os12g0101800 protein (Fragment) OS=Oryza sativa subsp. japonica OX=39947 GN=Os12g0101800 PE=4 SV=1;>sp|Q	0.497849	0.000707191	50.93		S	ESLIKYDARQKDHARSSVSELLLALKNPRSL	X;X;X;X;X;X;X;X;X;X;X;X;X;X;X;Phospho (STY);X;X;X;X;X;X;X;X;X;X;X;X;X;X;X	XXXXXXXXXXXXXXXPPPPPPPPPPPXXXXX	S(0.498)S(0.498)VS(0.004)ELLLALK	1	2	0.48339				15994	0	0	0	0	0	0	0	0	0
tr|A0A0P0Y5T3|A0A0P0Y5T3_ORYSJ;tr|A0A0N7KTF2|A0A0N7KTF2_ORYSJ;sp|Q2RBR1|PHT1B_ORYSJ;sp|Q2QYY8|PHT1A_ORYSJ	274;21;274;274	tr|A0A0P0Y5T3|A0A0P0Y5T3_ORYSJ	tr|A0A0P0Y5T3|A0A0P0Y5T3_ORYSJ	>tr|A0A0P0Y5T3|A0A0P0Y5T3_ORYSJ Os12g0101800 protein OS=Oryza sativa subsp. japonica OX=39947 GN=Os12g0101800 PE=4 SV=1;>tr|A0A0N7KTF2|A0A0N7KTF2_ORYSJ Os12g0101800 protein (Fragment) OS=Oryza sativa subsp. japonica OX=39947 GN=Os12g0101800 PE=4 SV=1;>sp|Q	0.497849	0.000707191	50.93		S	SLIKYDARQKDHARSSVSELLLALKNPRSLS	X;X;X;X;X;X;X;X;X;X;X;X;X;X;X;X;X;X;X;X;X;X;X;X;X;X;X;X;X;X;X	XXXXXXXXXXXXXXXXXXXXXXXXXXXXXXX	S(0.498)S(0.498)VS(0.004)ELLLALK	2	2	0.48339				15994	0	0	0	0	0	0	0	0	0
tr|A0A0P0Y5T3|A0A0P0Y5T3_ORYSJ;tr|A0A0N7KTF2|A0A0N7KTF2_ORYSJ;sp|Q2RBR1|PHT1B_ORYSJ;sp|Q2QYY8|PHT1A_ORYSJ	276;23;276;276	tr|A0A0P0Y5T3|A0A0P0Y5T3_ORYSJ	tr|A0A0P0Y5T3|A0A0P0Y5T3_ORYSJ	>tr|A0A0P0Y5T3|A0A0P0Y5T3_ORYSJ Os12g0101800 protein OS=Oryza sativa subsp. japonica OX=39947 GN=Os12g0101800 PE=4 SV=1;>tr|A0A0N7KTF2|A0A0N7KTF2_ORYSJ Os12g0101800 protein (Fragment) OS=Oryza sativa subsp. japonica OX=39947 GN=Os12g0101800 PE=4 SV=1;>sp|Q	0.617478	3.29e-05	78.86	1	S	IKYDARQKDHARSSVSELLLALKNPRSLSES	X;X;X;X;X;X;X;X;X;X;X;X;X;X;X;Phospho (STY);X;X;X;X;X;X;X;X;X;X;X;X;X;X;X	XXXXXXXXXXXXPPPPPPPPPPPXXXXXXXX	S(0.058)S(0.324)VS(0.617)ELLLALK	4	2	-0.18908			15995	15995	2664.9	2095.1	1842.5	619.77	867.33	982.16	1250.5	1631	1836.8
sp|Q2R374|RBR2_ORYSJ	857	sp|Q2R374|RBR2_ORYSJ	sp|Q2R374|RBR2_ORYSJ	>sp|Q2R374|RBR2_ORYSJ Retinoblastoma-related protein 2 OS=Oryza sativa subsp. japonica OX=39947 GN=RBR2 PE=2 SV=2	0.998305	0.000159894	73.993	1	S	TRPEDKRNTNSQIPGSPKSSPFSNLPDMSPK	X;X;X;X;X;X;X;X;X;X;X;X;X;X;X;Phospho (STY);X;X;X;X;X;X;X;X;X;X;X;X;X;X;X	XXXXXXXPPPPPPPPPPPXXXXXXXXXXXXX	NTNS(0.002)QIPGS(0.998)PK	9	2	2.1379			12520	12520	3952.6	3700.3	3932.2	3122.7	3282.3	4054.8	3777.1	3829	4591.7
sp|Q2R374|RBR2_ORYSJ	644	sp|Q2R374|RBR2_ORYSJ	sp|Q2R374|RBR2_ORYSJ	>sp|Q2R374|RBR2_ORYSJ Retinoblastoma-related protein 2 OS=Oryza sativa subsp. japonica OX=39947 GN=RBR2 PE=2 SV=2	0.837516	0.000115838	49.207	1	S	KRWPSAGPDGNCYPQSPKRLCTESRNSLVER	X;X;X;X;X;X;X;X;X;X;X;X;X;X;X;Phospho (STY);X;X;X;X;X;X;X;X;X;X;X;X;X;X;X	XXPPPPPPPPPPPPPPPPXXXXXXXXXXXXX	WPSAGPDGNCY(0.162)PQS(0.838)PK	14	3	-0.29633			19528	19528	3825.7	4028.4	3220.6	3737.2	3061.5	3961.7	3562.5	3787.2	3637.9
tr|A0A0P0Y253|A0A0P0Y253_ORYSJ;sp|Q2R4J4|C3H63_ORYSJ;tr|A0A0P0Y2A9|A0A0P0Y2A9_ORYSJ	362;392;111	tr|A0A0P0Y253|A0A0P0Y253_ORYSJ	tr|A0A0P0Y253|A0A0P0Y253_ORYSJ	>tr|A0A0P0Y253|A0A0P0Y253_ORYSJ Os11g0472000 protein (Fragment) OS=Oryza sativa subsp. japonica OX=39947 GN=Os11g0472000 PE=4 SV=1;>sp|Q2R4J4|C3H63_ORYSJ Zinc finger CCCH domain-containing protein 63 OS=Oryza sativa subsp. japonica OX=39947 GN=Os11g0472000	0.900829	8.96e-36	140.9	1	S	KFDHPMGTVMYGLATSPTGDVSARRMLAPVP	X;X;X;X;X;Oxidation (M);X;X;X;Oxidation (M);X;X;X;X;X;Phospho (STY);X;X;X;X;X;X;X;X;X;Oxidation (M);X;X;X;X;X	XPPPPPPPPPPPPPPPPPPPPPPPXXXXXXX	FDHPMGTVMYGLAT(0.085)S(0.901)PT(0.014)GDVSAR	15	3	-0.49745			5249;5250;5253;5255;5256	5249	12929	11692	11008	10851	11268	12726	12507	12108	12222
tr|A0A0P0Y253|A0A0P0Y253_ORYSJ;sp|Q2R4J4|C3H63_ORYSJ;tr|A0A0P0Y2A9|A0A0P0Y2A9_ORYSJ	380;410;129	tr|A0A0P0Y253|A0A0P0Y253_ORYSJ	tr|A0A0P0Y253|A0A0P0Y253_ORYSJ	>tr|A0A0P0Y253|A0A0P0Y253_ORYSJ Os11g0472000 protein (Fragment) OS=Oryza sativa subsp. japonica OX=39947 GN=Os11g0472000 PE=4 SV=1;>sp|Q2R4J4|C3H63_ORYSJ Zinc finger CCCH domain-containing protein 63 OS=Oryza sativa subsp. japonica OX=39947 GN=Os11g0472000	0.553925	3.09e-14	99.257	1	S	GDVSARRMLAPVPAHSEVSPDNVSGRSRRIT	X;X;X;X;X;X;X;X;X;X;X;X;X;X;X;Phospho (STY);X;X;X;X;X;X;X;X;X;X;X;X;X;X;X	XXXXXXXPPPPPPPPPPPPPPPPPPPXXXXX	MLAPVPAHS(0.554)EVS(0.445)PDNVS(0.001)GR	9	3	0.048247			11663;11664	11664	10815	10859	10405	8918	8637.7	10029	11495	11241	10306
tr|A0A0P0Y253|A0A0P0Y253_ORYSJ;sp|Q2R4J4|C3H63_ORYSJ;tr|A0A0P0Y2A9|A0A0P0Y2A9_ORYSJ	383;413;132	tr|A0A0P0Y253|A0A0P0Y253_ORYSJ	tr|A0A0P0Y253|A0A0P0Y253_ORYSJ	>tr|A0A0P0Y253|A0A0P0Y253_ORYSJ Os11g0472000 protein (Fragment) OS=Oryza sativa subsp. japonica OX=39947 GN=Os11g0472000 PE=4 SV=1;>sp|Q2R4J4|C3H63_ORYSJ Zinc finger CCCH domain-containing protein 63 OS=Oryza sativa subsp. japonica OX=39947 GN=Os11g0472000	0.862004	5.16e-17	117.16	1	S	SARRMLAPVPAHSEVSPDNVSGRSRRITHSD	X;X;X;X;Oxidation (M);X;X;X;X;X;X;X;X;X;X;Phospho (STY);X;X;X;X;X;X;X;X;X;X;X;X;X;X;X	XXXXPPPPPPPPPPPPPPPPPPPXXXXXXXX	MLAPVPAHS(0.137)EVS(0.862)PDNVS(0.001)GR	12	3	-0.35605			11660;11661;11662;11665;11666	11666	37793	36834	32740	37540	34810	38933	33548	35181	32917
sp|Q2TQ34|AP21_ORYSJ	354	sp|Q2TQ34|AP21_ORYSJ	sp|Q2TQ34|AP21_ORYSJ	>sp|Q2TQ34|AP21_ORYSJ APETALA2-like protein 1 OS=Oryza sativa subsp. japonica OX=39947 GN=AP2-1 PE=1 SV=1	0.999838	1.22e-06	82.183	1	S	VDLNLRISQPAASQQSPKRDSGSLGLQIHHG	X;X;X;X;X;X;X;X;X;X;X;X;X;X;X;Phospho (STY);X;X;X;X;X;X;X;X;X;X;X;X;X;X;X	XXXXXXPPPPPPPPPPPPXXXXXXXXXXXXX	ISQPAASQQS(1)PK	10	2	-0.87254			8680;8681	8681	10008	9400.8	9982.6	9743.5	10610	11138	10244	10626	9918.9
sp|Q336R9|MSRA4_ORYSJ	73	sp|Q336R9|MSRA4_ORYSJ	sp|Q336R9|MSRA4_ORYSJ	>sp|Q336R9|MSRA4_ORYSJ Peptide methionine sulfoxide reductase A4, chloroplastic OS=Oryza sativa subsp. japonica OX=39947 GN=MSRA4 PE=2 SV=2	1	2.98e-05	105.3	1	S	AMSWLGKLGLGGLGGSPRASAASAALAQGPD	X;X;X;X;X;X;X;X;X;X;X;X;X;X;X;Phospho (STY);X;X;X;X;X;X;X;X;X;X;X;X;X;X;X	XXXXXXXPPPPPPPPPPPXXXXXXXXXXXXX	LGLGGLGGS(1)PR	9	3	-0.35698			10123;10124;10125;10126;10127;10128	10128	59758	56111	56352	66652	62063	63600	58817	60064	58206
sp|Q338B0|HFA2C_ORYSJ	356	sp|Q338B0|HFA2C_ORYSJ	sp|Q338B0|HFA2C_ORYSJ	>sp|Q338B0|HFA2C_ORYSJ Heat stress transcription factor A-2c OS=Oryza sativa subsp. japonica OX=39947 GN=HSFA2C PE=1 SV=2	0.61211	1.25e-05	52.481	1	S	GIDELAQQLGYLSSTSPK_____________	X;X;X;X;X;X;X;X;X;X;X;X;X;X;X;Phospho (STY);X;X;X;X;X;X;X;X;X;X;X;X;X;X;X	PPPPPPPPPPPPPPPPPPXXXXXXXXXXXXX	IDGIDELAQQLGY(0.019)LS(0.078)S(0.066)T(0.225)S(0.612)PK	18	4	0.4052			8073;8074	8074	1272.7	1292.3	1222	1357.7	1215.3	1377.3	927.7	1234	999.54
tr|Q7JAI4|Q7JAI4_ORYSJ;sp|Q35322|NDUS3_ORYSJ	188;188	tr|Q7JAI4|Q7JAI4_ORYSJ	tr|Q7JAI4|Q7JAI4_ORYSJ	>tr|Q7JAI4|Q7JAI4_ORYSJ NADH dehydrogenase subunit 9 OS=Oryza sativa subsp. japonica OX=39947 GN=nad9 PE=3 SV=2;>sp|Q35322|NDUS3_ORYSJ NADH dehydrogenase [ubiquinone] iron-sulfur protein 3 OS=Oryza sativa subsp. japonica OX=39947 GN=NAD9 PE=2 SV=2	0.999999	4.83e-12	124.35	1	S	QEFRYFDFASPWEQRSDG_____________	X;X;X;X;X;X;X;X;X;X;X;X;X;X;X;Phospho (STY);X;X;X;X;X;X;X;X;X;X;X;X;X;X;X	XXXXPPPPPPPPPPPPPPXXXXXXXXXXXXX	YFDFASPWEQRS(1)DG	12	2	-1.4236			19762;19763;19764;19765;19766;19767	19765	11114	11517	10231	12712	12005	12331	10676	11345	11741
sp|Q3HRP1|CNBL6_ORYSJ	216	sp|Q3HRP1|CNBL6_ORYSJ	sp|Q3HRP1|CNBL6_ORYSJ	>sp|Q3HRP1|CNBL6_ORYSJ Calcineurin B-like protein 6 OS=Oryza sativa subsp. japonica OX=39947 GN=CBL6 PE=2 SV=1	0.699581	0.0011594	38.029	1	S	NMTLPYLRDITTTFPSFVFNSQVEDA_____	X;X;X;X;X;X;X;X;X;X;X;X;X;X;X;Phospho (STY);X;X;X;X;X;X;X;X;X;X;X;X;X;X;X	XXXXXXXXPPPPPPPPPPPPPPPPPPXXXXX	DIT(0.011)T(0.039)T(0.158)FPS(0.7)FVFNS(0.093)QVEDA	8	3	-0.42255			2984	2984	307.08	296.47	371.88	227.61	309.87	333.23	269.91	314.08	297.49
sp|Q75LU8|CNBL3_ORYSJ;sp|Q3HRP5|CNBL2_ORYSJ	215;215	sp|Q75LU8|CNBL3_ORYSJ	sp|Q75LU8|CNBL3_ORYSJ	>sp|Q75LU8|CNBL3_ORYSJ Calcineurin B-like protein 3 OS=Oryza sativa subsp. japonica OX=39947 GN=CBL3 PE=1 SV=1;>sp|Q3HRP5|CNBL2_ORYSJ Calcineurin B-like protein 2 OS=Oryza sativa subsp. japonica OX=39947 GN=CBL2 PE=2 SV=1	0.982243	1.6e-05	57.721	1	S	NMTLQYLKDITTTFPSFVFHSQVDDT_____	X;X;X;X;X;X;X;X;X;X;X;X;X;X;X;Phospho (STY);X;X;X;X;X;X;X;X;X;X;X;X;X;X;X	XXXXXXXXPPPPPPPPPPPPPPPPPPXXXXX	DITT(0.001)T(0.002)FPS(0.982)FVFHS(0.007)QVDDT(0.007)	8	2	-0.27615			2978;2979;2981;2982;2983	2983	3484.3	3644.6	3932.7	3243.5	2893.2	3219.8	3653.8	3761	3278.7
sp|Q75LU8|CNBL3_ORYSJ;sp|Q3HRP5|CNBL2_ORYSJ	220;220	sp|Q75LU8|CNBL3_ORYSJ	sp|Q75LU8|CNBL3_ORYSJ	>sp|Q75LU8|CNBL3_ORYSJ Calcineurin B-like protein 3 OS=Oryza sativa subsp. japonica OX=39947 GN=CBL3 PE=1 SV=1;>sp|Q3HRP5|CNBL2_ORYSJ Calcineurin B-like protein 2 OS=Oryza sativa subsp. japonica OX=39947 GN=CBL2 PE=2 SV=1	0.470456	9.2e-05	45.178		S	YLKDITTTFPSFVFHSQVDDT__________	X;X;X;X;X;X;X;X;X;X;X;X;X;X;X;X;X;X;X;X;X;X;X;X;X;X;X;X;X;X;X	XXXXXXXXXXXXXXXXXXXXXXXXXXXXXXX	DIT(0.002)T(0.009)T(0.038)FPS(0.47)FVFHS(0.47)QVDDT(0.009)	13	3	0.36606				2980	0	0	0	0	0	0	0	0	0
sp|Q40677|ALFP_ORYSJ	65	sp|Q40677|ALFP_ORYSJ	sp|Q40677|ALFP_ORYSJ	>sp|Q40677|ALFP_ORYSJ Fructose-bisphosphate aldolase, chloroplastic OS=Oryza sativa subsp. japonica OX=39947 GN=ALDP PE=1 SV=2	0.999221	1.4e-08	93.839	1	S	KTIASPGRGILAMDESNATCGKRLASIGLEN	X;X;X;X;X;X;X;X;X;X;X;X;X;X;X;Phospho (STY);X;X;X;X;X;X;X;X;X;Phospho (STY);X;X;X;X;X	XXXXXXXXPPPPPPPPPPPPPPXXXXXXXXX	GILAMDES(0.999)NAT(0.001)CGK	8	3	-0.60684			6742;6743;6744;6745	6744	19770	17932	17619	17826	17862	17631	20278	20116	20501
sp|Q40677|ALFP_ORYSJ	147	sp|Q40677|ALFP_ORYSJ	sp|Q40677|ALFP_ORYSJ	>sp|Q40677|ALFP_ORYSJ Fructose-bisphosphate aldolase, chloroplastic OS=Oryza sativa subsp. japonica OX=39947 GN=ALDP PE=1 SV=2	0.81308	3.81e-09	58.581	1	S	VPGIKVDKGLVPLAGSNNESWCQGLDGLASR	X;X;X;X;X;X;X;X;X;X;X;X;X;X;X;Phospho (STY);X;X;X;X;X;X;X;X;X;X;X;X;X;X;X	XXXXXXXXPPPPPPPPPPPPPPPPPPPPPPP	GLVPLAGS(0.813)NNES(0.187)WCQGLDGLASR	8	3	-0.38489			7023;7026	7023	1360.1	1255.2	1305.9	1270.6	1495.5	1354.8	1320.8	1312.2	1293.4
sp|Q40677|ALFP_ORYSJ	151	sp|Q40677|ALFP_ORYSJ	sp|Q40677|ALFP_ORYSJ	>sp|Q40677|ALFP_ORYSJ Fructose-bisphosphate aldolase, chloroplastic OS=Oryza sativa subsp. japonica OX=39947 GN=ALDP PE=1 SV=2	0.999999	3.36e-38	189.2	1	S	KVDKGLVPLAGSNNESWCQGLDGLASREAAY	X;X;X;X;X;X;X;X;X;X;X;X;X;X;X;Phospho (STY);X;X;X;X;X;X;X;X;X;X;X;X;X;X;X	XXXXPPPPPPPPPPPPPPPPPPPPPPPXXXX	GLVPLAGSNNES(1)WCQGLDGLASR	12	3	-0.16494			7020;7021;7022;7024;7027;7028;7029;7030	7030	8108.3	7727.8	6272.2	7687.9	7047.3	7323.7	7511.7	7497.3	6912.5
sp|Q40677|ALFP_ORYSJ	161	sp|Q40677|ALFP_ORYSJ	sp|Q40677|ALFP_ORYSJ	>sp|Q40677|ALFP_ORYSJ Fructose-bisphosphate aldolase, chloroplastic OS=Oryza sativa subsp. japonica OX=39947 GN=ALDP PE=1 SV=2	0.999786	1.65e-09	63.611	1	S	GSNNESWCQGLDGLASREAAYYQQGARFAKW	X;X;X;X;X;X;X;X;X;X;X;X;X;X;X;Phospho (STY);X;X;X;X;X;X;X;X;X;X;X;X;X;X;X	PPPPPPPPPPPPPPPPPXXXXXXXXXXXXXX	GLVPLAGSNNESWCQGLDGLAS(1)R	22	3	-0.60559			7025	7025	1564.5	1600.7	1722.9	1551.8	1129.9	1037.2	1579.3	1738.3	1508.1
sp|Q40677|ALFP_ORYSJ	75	sp|Q40677|ALFP_ORYSJ	sp|Q40677|ALFP_ORYSJ	>sp|Q40677|ALFP_ORYSJ Fructose-bisphosphate aldolase, chloroplastic OS=Oryza sativa subsp. japonica OX=39947 GN=ALDP PE=1 SV=2	0.991578	0.00184605	34.586	1	S	LAMDESNATCGKRLASIGLENTEANRQAYRT	X;X;Oxidation (M);X;X;Phospho (STY);X;X;X;X;X;X;X;X;X;Phospho (STY);X;X;X;X;X;X;X;X;X;X;X;X;X;X;X	XXXXXXXXXXXXXPPPPPPPPPPPPPXXXXX	LAS(0.992)IGLENT(0.008)EANR	3	2	1.6969			9767;9768	9768	10753	10269	10220	8782.9	8299.4	9293.1	7891.1	8396.3	9083
sp|Q40677|ALFP_ORYSJ	370	sp|Q40677|ALFP_ORYSJ	sp|Q40677|ALFP_ORYSJ	>sp|Q40677|ALFP_ORYSJ Fructose-bisphosphate aldolase, chloroplastic OS=Oryza sativa subsp. japonica OX=39947 GN=ALDP PE=1 SV=2	0.986724	2.26e-05	141.79	1	S	LRAKANSLAQLGKYTSDGEAAEAKEGMFVKN	X;X;X;X;X;X;X;X;X;X;X;X;X;X;X;Phospho (STY);X;X;X;X;X;X;X;X;X;X;X;X;X;X;X	XXXXXXXXXXXXXPPPPPPPPPPPXXXXXXX	YT(0.013)S(0.987)DGEAAEAK	3	2	0.30397			20140;20141;20142;20143;20144	20141	67647	64514	63669	58056	57673	57319	58714	62074	61739
sp|Q40680|EF1D1_ORYSJ	49	sp|Q40680|EF1D1_ORYSJ	sp|Q40680|EF1D1_ORYSJ	>sp|Q40680|EF1D1_ORYSJ Elongation factor 1-delta 1 OS=Oryza sativa subsp. japonica OX=39947 GN=Os07g0614500 PE=2 SV=3	0.348806	5.31e-08	52.741		S	NDDLAVYSAFSTAPSSSYTNVARWFTHIDAL	X;X;X;X;X;X;X;X;X;X;X;X;X;X;X;Phospho (STY);X;X;X;X;X;X;X;X;X;X;X;X;X;X;X	PPPPPPPPPPPPPPPPPPPPPPPXXXXXXXX	SYISGYQASNDDLAVY(0.002)S(0.002)AFS(0.008)T(0.02)APS(0.123)S(0.349)S(0.349)Y(0.002)T(0.147)NVAR	25	3	0.29276				16351	0	0	0	0	0	0	0	0	0
sp|Q40680|EF1D1_ORYSJ	50	sp|Q40680|EF1D1_ORYSJ	sp|Q40680|EF1D1_ORYSJ	>sp|Q40680|EF1D1_ORYSJ Elongation factor 1-delta 1 OS=Oryza sativa subsp. japonica OX=39947 GN=Os07g0614500 PE=2 SV=3	0.715122	1.05e-18	87.779	1	S	DDLAVYSAFSTAPSSSYTNVARWFTHIDALL	X;X;X;X;X;X;X;X;X;X;X;X;X;X;X;Phospho (STY);X;X;X;X;X;X;X;X;X;X;X;X;X;X;X	PPPPPPPPPPPPPPPPPPPPPPXXXXXXXXX	SYISGYQASNDDLAVYSAFSTAPS(0.015)S(0.208)S(0.715)YT(0.062)NVAR	26	4	1.308			16352	16352	396	379.14	318.82	366.86	540.37	370.8	443.3	479.03	547.5
sp|Q40680|EF1D1_ORYSJ	88	sp|Q40680|EF1D1_ORYSJ	sp|Q40680|EF1D1_ORYSJ	>sp|Q40680|EF1D1_ORYSJ Elongation factor 1-delta 1 OS=Oryza sativa subsp. japonica OX=39947 GN=Os07g0614500 PE=2 SV=3	0.553063	9.12e-13	88.239	1	S	DGQGVKVESTAVPSASTPDVADAKAPAADDD	X;X;X;X;X;X;X;X;X;X;X;X;X;X;X;Phospho (STY);X;X;X;X;X;X;X;X;X;X;X;X;X;X;X	XXXXXXPPPPPPPPPPPPPPPPPPXXXXXXX	VESTAVPS(0.004)AS(0.553)T(0.443)PDVADAK	10	2	-1.1854			18216	18216	3024.2	3337.8	3353.5	3620.9	3114.2	3856	2782.5	3235.9	3205.4
sp|Q40682|EF1D2_ORYSJ	87	sp|Q40682|EF1D2_ORYSJ	sp|Q40682|EF1D2_ORYSJ	>sp|Q40682|EF1D2_ORYSJ Elongation factor 1-delta 2 OS=Oryza sativa subsp. japonica OX=39947 GN=Os03g0406200 PE=2 SV=3	0.999667	1.36e-12	134.46	1	S	AEGEGVKVESTACSVSPTADQKAPAADEEDD	X;X;X;X;X;X;X;X;X;X;X;X;X;X;X;Phospho (STY);X;X;X;X;X;X;X;X;X;X;X;X;X;X;X	XXXXXXXPPPPPPPPPPPPPPPXXXXXXXXX	VESTACSVS(1)PTADQK	9	3	-0.38429			18207;18208;18209	18209	22790	22817	21637	24305	23108	24012	23915	24203	24319
tr|A0A0P0UZH3|A0A0P0UZH3_ORYSJ;sp|Q43007|PLDA1_ORYSJ	29;29	tr|A0A0P0UZH3|A0A0P0UZH3_ORYSJ	tr|A0A0P0UZH3|A0A0P0UZH3_ORYSJ	>tr|A0A0P0UZH3|A0A0P0UZH3_ORYSJ Phospholipase D (Fragment) OS=Oryza sativa subsp. japonica OX=39947 GN=Os01g0172400 PE=3 SV=1;>sp|Q43007|PLDA1_ORYSJ Phospholipase D alpha 1 OS=Oryza sativa subsp. japonica OX=39947 GN=PLD1 PE=1 SV=2	0.898447	0.040227	12.543	1	S	IFEAASLSNPHRASGSAPKFIRKFVEGIEDT	X;X;X;X;X;X;X;X;X;X;X;X;X;X;X;Phospho (STY);X;X;X;X;X;X;X;X;X;X;X;X;X;X;X	XXXXXXXXXXXXPPPPPPPXXXXXXXXXXXX	AS(0.102)GS(0.898)APK	4	2	-0.9185			1760;1761	1761	24193	23684	22063	26516	25702	25967	25938	27264	25344
sp|Q53JF7|ASR5_ORYSJ	124	sp|Q53JF7|ASR5_ORYSJ	sp|Q53JF7|ASR5_ORYSJ	>sp|Q53JF7|ASR5_ORYSJ Abscisic stress-ripening protein 5 OS=Oryza sativa subsp. japonica OX=39947 GN=ASR5 PE=1 SV=1	0.998967	0.000106091	92.865	1	S	GYAFHEHHEKKKDHKSAEESTGEKKHHLFG_	X;X;X;X;X;X;X;X;X;X;X;X;X;X;X;Phospho (STY);X;X;X;X;X;X;X;X;X;X;X;X;X;X;X	XXXXXXXXXXXXPPPPPPPPPPPPXXXXXXX	DHKS(0.999)AEES(0.001)T(0.001)GEK	4	3	0.44148			2906;14030;14032;14034	2906	27889	26780	25773	32405	32716	34012	40416	40165	41873
sp|Q53JF7|ASR5_ORYSJ	128	sp|Q53JF7|ASR5_ORYSJ	sp|Q53JF7|ASR5_ORYSJ	>sp|Q53JF7|ASR5_ORYSJ Abscisic stress-ripening protein 5 OS=Oryza sativa subsp. japonica OX=39947 GN=ASR5 PE=1 SV=1	0.919491	1.04e-07	89.3	1	S	HEHHEKKKDHKSAEESTGEKKHHLFG_____	X;X;X;X;X;X;X;X;X;X;X;X;X;X;X;Phospho (STY);X;X;X;X;X;X;X;X;X;X;X;X;X;X;X	XXXXXXXXXXXPPPPPPPPPXXXXXXXXXXX	SAEES(0.919)T(0.081)GEK	5	2	0.32084			14031;14033;14035	14031	15052	14678	13466	11459	10942	13229	27018	28525	28158
tr|A0A0P0Y112|A0A0P0Y112_ORYSJ;sp|Q53JI9|SPSA5_ORYSJ	185;690	tr|A0A0P0Y112|A0A0P0Y112_ORYSJ	tr|A0A0P0Y112|A0A0P0Y112_ORYSJ	>tr|A0A0P0Y112|A0A0P0Y112_ORYSJ UDP-glucose-fructose-phosphate glucosyltransferase (Fragment) OS=Oryza sativa subsp. japonica OX=39947 GN=Os11g0236100 PE=4 SV=1;>sp|Q53JI9|SPSA5_ORYSJ Probable sucrose-phosphate synthase 5 OS=Oryza sativa subsp. japonica OX	0.999939	5.37e-33	121.18	1	S	SEPLSDSLRDLSLRISVDAASPDLSAGDSAA	X;X;X;X;X;X;X;X;X;X;X;X;X;X;X;Phospho (STY);X;X;X;X;X;X;X;X;X;X;X;X;X;X;X	XXXXXXXXXXXXXXPPPPPPPPPPPPPPPPP	IS(1)VDAASPDLSAGDSAAAILDALR	2	3	-1.9297			8709;8710;8712;8713	8709	1485.8	1653.2	1552.2	1065.7	1251.1	1116.6	1141.2	1612.7	1232.1
tr|A0A0P0Y112|A0A0P0Y112_ORYSJ;sp|Q53JI9|SPSA5_ORYSJ	190;695	tr|A0A0P0Y112|A0A0P0Y112_ORYSJ	tr|A0A0P0Y112|A0A0P0Y112_ORYSJ	>tr|A0A0P0Y112|A0A0P0Y112_ORYSJ UDP-glucose-fructose-phosphate glucosyltransferase (Fragment) OS=Oryza sativa subsp. japonica OX=39947 GN=Os11g0236100 PE=4 SV=1;>sp|Q53JI9|SPSA5_ORYSJ Probable sucrose-phosphate synthase 5 OS=Oryza sativa subsp. japonica OX	0.987935	2.25e-09	62.311	1	S	DSLRDLSLRISVDAASPDLSAGDSAAAILDA	X;X;X;X;X;X;X;X;X;X;X;X;X;X;X;Phospho (STY);X;X;X;X;X;X;X;X;X;X;X;X;X;X;X	XXXXXXXXXPPPPPPPPPPPPPPPPPPPPPP	IS(0.007)VDAAS(0.988)PDLS(0.005)AGDSAAAILDALR	7	3	-2.7895			8708;8711	8711	532.34	590.07	564.79	495.1	351.03	450.21	379.31	553.71	464.96
tr|A0A0P0Y112|A0A0P0Y112_ORYSJ;sp|Q53JI9|SPSA5_ORYSJ	211;716	tr|A0A0P0Y112|A0A0P0Y112_ORYSJ	tr|A0A0P0Y112|A0A0P0Y112_ORYSJ	>tr|A0A0P0Y112|A0A0P0Y112_ORYSJ UDP-glucose-fructose-phosphate glucosyltransferase (Fragment) OS=Oryza sativa subsp. japonica OX=39947 GN=Os11g0236100 PE=4 SV=1;>sp|Q53JI9|SPSA5_ORYSJ Probable sucrose-phosphate synthase 5 OS=Oryza sativa subsp. japonica OX	0.959412	4.63e-05	59.944	1	S	GDSAAAILDALRRRRSTDRPAASSAARAIGF	X;X;X;X;X;X;X;X;X;X;X;X;X;X;X;Phospho (STY);X;X;X;X;X;X;X;X;X;X;X;X;X;X;X	XXXXXXXXXXXXXXXPPPPPPPPPPPPXXXX	S(0.959)T(0.04)DRPAASSAAR	1	2	-0.29126			16014;16015;16016;16017;16018	16017	11255	10744	10333	8554.1	8392.5	8366.7	11555	12293	11440
tr|A0A0P0Y112|A0A0P0Y112_ORYSJ;sp|Q53JI9|SPSA5_ORYSJ	152;657	tr|A0A0P0Y112|A0A0P0Y112_ORYSJ	tr|A0A0P0Y112|A0A0P0Y112_ORYSJ	>tr|A0A0P0Y112|A0A0P0Y112_ORYSJ UDP-glucose-fructose-phosphate glucosyltransferase (Fragment) OS=Oryza sativa subsp. japonica OX=39947 GN=Os11g0236100 PE=4 SV=1;>sp|Q53JI9|SPSA5_ORYSJ Probable sucrose-phosphate synthase 5 OS=Oryza sativa subsp. japonica OX	0.20334	1.69e-05	41.793		S	DHPAPHQLLRVPPSPSSSSAAAAAAGGGGAA	X;X;X;X;X;X;X;X;X;X;X;X;X;X;X;Phospho (STY);X;X;X;X;X;X;X;X;X;X;X;X;X;X;X	XXXXXXXXXXPPPPPPPPPPPPPPPPPPPPP	VPPS(0.187)PS(0.203)S(0.203)S(0.203)S(0.203)AAAAAAGGGGAAASSEPLSDSLR	6	3	-2.3125				18786	0	0	0	0	0	0	0	0	0
tr|A0A0P0Y112|A0A0P0Y112_ORYSJ;sp|Q53JI9|SPSA5_ORYSJ	153;658	tr|A0A0P0Y112|A0A0P0Y112_ORYSJ	tr|A0A0P0Y112|A0A0P0Y112_ORYSJ	>tr|A0A0P0Y112|A0A0P0Y112_ORYSJ UDP-glucose-fructose-phosphate glucosyltransferase (Fragment) OS=Oryza sativa subsp. japonica OX=39947 GN=Os11g0236100 PE=4 SV=1;>sp|Q53JI9|SPSA5_ORYSJ Probable sucrose-phosphate synthase 5 OS=Oryza sativa subsp. japonica OX	0.20334	1.69e-05	41.793		S	HPAPHQLLRVPPSPSSSSAAAAAAGGGGAAA	X;X;X;X;X;X;X;X;X;X;X;X;X;X;X;X;X;X;X;X;X;X;X;X;X;X;X;X;X;X;X	XXXXXXXXXXXXXXXXXXXXXXXXXXXXXXX	VPPS(0.187)PS(0.203)S(0.203)S(0.203)S(0.203)AAAAAAGGGGAAASSEPLSDSLR	7	3	-2.3125				18786	0	0	0	0	0	0	0	0	0
tr|A0A0P0Y112|A0A0P0Y112_ORYSJ;sp|Q53JI9|SPSA5_ORYSJ	154;659	tr|A0A0P0Y112|A0A0P0Y112_ORYSJ	tr|A0A0P0Y112|A0A0P0Y112_ORYSJ	>tr|A0A0P0Y112|A0A0P0Y112_ORYSJ UDP-glucose-fructose-phosphate glucosyltransferase (Fragment) OS=Oryza sativa subsp. japonica OX=39947 GN=Os11g0236100 PE=4 SV=1;>sp|Q53JI9|SPSA5_ORYSJ Probable sucrose-phosphate synthase 5 OS=Oryza sativa subsp. japonica OX	0.20334	1.69e-05	41.793		S	PAPHQLLRVPPSPSSSSAAAAAAGGGGAAAS	X;X;X;X;X;X;X;X;X;X;X;X;X;X;X;X;X;X;X;X;X;X;X;X;X;X;X;X;X;X;X	XXXXXXXXXXXXXXXXXXXXXXXXXXXXXXX	VPPS(0.187)PS(0.203)S(0.203)S(0.203)S(0.203)AAAAAAGGGGAAASSEPLSDSLR	8	3	-2.3125				18786	0	0	0	0	0	0	0	0	0
tr|A0A0P0Y112|A0A0P0Y112_ORYSJ;sp|Q53JI9|SPSA5_ORYSJ	155;660	tr|A0A0P0Y112|A0A0P0Y112_ORYSJ	tr|A0A0P0Y112|A0A0P0Y112_ORYSJ	>tr|A0A0P0Y112|A0A0P0Y112_ORYSJ UDP-glucose-fructose-phosphate glucosyltransferase (Fragment) OS=Oryza sativa subsp. japonica OX=39947 GN=Os11g0236100 PE=4 SV=1;>sp|Q53JI9|SPSA5_ORYSJ Probable sucrose-phosphate synthase 5 OS=Oryza sativa subsp. japonica OX	0.20334	1.69e-05	41.793		S	APHQLLRVPPSPSSSSAAAAAAGGGGAAASS	X;X;X;X;X;X;X;X;X;X;X;X;X;X;X;X;X;X;X;X;X;X;X;X;X;X;X;X;X;X;X	XXXXXXXXXXXXXXXXXXXXXXXXXXXXXXX	VPPS(0.187)PS(0.203)S(0.203)S(0.203)S(0.203)AAAAAAGGGGAAASSEPLSDSLR	9	3	-2.3125				18786	0	0	0	0	0	0	0	0	0
sp|Q53P85|CDPKO_ORYSJ	499	sp|Q53P85|CDPKO_ORYSJ	sp|Q53P85|CDPKO_ORYSJ	>sp|Q53P85|CDPKO_ORYSJ Calcium-dependent protein kinase 24 OS=Oryza sativa subsp. japonica OX=39947 GN=CPK24 PE=1 SV=1	0.999999	1.02e-16	111.07	1;2	S	RKGNAGGAGRRTMRNSLQLNLGEILNPSNS_	X;X;X;X;X;X;X;X;X;X;X;Phospho (STY);X;X;X;Phospho (STY);X;X;X;X;X;X;X;X;X;X;X;X;X;X;X	XXXXXXXXXXPPPPPPPPPPPPPPPPPPPPX	T(1)MRNS(1)LQLNLGEILNPSNS	5	3	-0.19912			12491;12492;12493;12494;12495;13903;17157	17157	2264.1	2795.1	2311.1	1981.5	1967.7	2553.7	2878	2837.4	2860.5
tr|A0A0P0VD66|A0A0P0VD66_ORYSJ;sp|Q5JK52|NADK1_ORYSJ	430;526	tr|A0A0P0VD66|A0A0P0VD66_ORYSJ	tr|A0A0P0VD66|A0A0P0VD66_ORYSJ	>tr|A0A0P0VD66|A0A0P0VD66_ORYSJ Os01g0957000 protein (Fragment) OS=Oryza sativa subsp. japonica OX=39947 GN=Os01g0957000 PE=3 SV=1;>sp|Q5JK52|NADK1_ORYSJ Probable NAD kinase 1 OS=Oryza sativa subsp. japonica OX=39947 GN=Os01g0957000 PE=2 SV=1	0.992998	0.00922166	45.727	1	S	RSIHEGLHWNLRKSQSFDGPRD_________	X;X;X;X;X;X;X;X;X;X;X;X;X;X;X;Phospho (STY);X;X;X;X;X;X;X;X;X;X;X;X;X;X;X	XXXXXXXXXXXXXPPPPPPPPPXXXXXXXXX	S(0.007)QS(0.993)FDGPRD	3	2	0.42449			15606	15606	10464	10624	9738.1	13797	12072	13920	10327	9960.7	9677.4
sp|Q5JK68|CDKC2_ORYSJ	93	sp|Q5JK68|CDKC2_ORYSJ	sp|Q5JK68|CDKC2_ORYSJ	>sp|Q5JK68|CDKC2_ORYSJ Cyclin-dependent kinase C-2 OS=Oryza sativa subsp. japonica OX=39947 GN=CDKC-2 PE=2 SV=1	0.78521	6.83e-09	60.679	1	S	KLHHQNVIQLKEIVTSPGPERDEQGKPIEGN	X;X;X;X;X;X;X;X;X;X;X;X;X;X;X;Phospho (STY);X;X;X;X;X;X;X;X;X;X;X;X;X;X;X	XXXXXXXXXXXPPPPPPPPPPPPPPPPPPPP	EIVT(0.215)S(0.785)PGPERDEQGKPIEGNK	5	4	-0.020165			4202	4202	11057	11808	11631	11518	11601	12135	11150	11911	11749
tr|A0A0P0V3W9|A0A0P0V3W9_ORYSJ;tr|A0A0P0V3W4|A0A0P0V3W4_ORYSJ;sp|Q5JKF2|RH40_ORYSJ	24;397;550	tr|A0A0P0V3W9|A0A0P0V3W9_ORYSJ	tr|A0A0P0V3W9|A0A0P0V3W9_ORYSJ	>tr|A0A0P0V3W9|A0A0P0V3W9_ORYSJ Os01g0549400 protein OS=Oryza sativa subsp. japonica OX=39947 GN=Os01g0549400 PE=4 SV=1;>tr|A0A0P0V3W4|A0A0P0V3W4_ORYSJ Os01g0549400 protein (Fragment) OS=Oryza sativa subsp. japonica OX=39947 GN=Os01g0549400 PE=3 SV=1;>sp|Q	0.882691	0.000129386	52.014	1	S	GRKRNRWATRSDRGGSHSELDSRYGGRDGLS	X;X;X;X;X;X;X;X;X;X;X;X;X;X;X;Phospho (STY);X;X;X;X;X;X;X;X;X;X;X;X;X;X;X	XXXXXXXXXXPPPPPPPPPPPPPXXXXXXXX	S(0.115)DRGGS(0.883)HS(0.002)ELDSR	6	3	0.37473			14312;14313;14314	14314	4673.7	4976.8	4794.7	5229.1	5558	4945.4	5673.7	5309.1	5770.3
tr|A0A0P0V3W9|A0A0P0V3W9_ORYSJ;tr|A0A0P0V3W4|A0A0P0V3W4_ORYSJ;sp|Q5JKF2|RH40_ORYSJ	26;399;552	tr|A0A0P0V3W9|A0A0P0V3W9_ORYSJ	tr|A0A0P0V3W9|A0A0P0V3W9_ORYSJ	>tr|A0A0P0V3W9|A0A0P0V3W9_ORYSJ Os01g0549400 protein OS=Oryza sativa subsp. japonica OX=39947 GN=Os01g0549400 PE=4 SV=1;>tr|A0A0P0V3W4|A0A0P0V3W4_ORYSJ Os01g0549400 protein (Fragment) OS=Oryza sativa subsp. japonica OX=39947 GN=Os01g0549400 PE=3 SV=1;>sp|Q	0.524065	0.000165334	86.723	1	S	KRNRWATRSDRGGSHSELDSRYGGRDGLSGS	X;X;X;X;X;X;X;X;X;X;X;X;X;X;X;Phospho (STY);X;X;X;X;X;X;X;X;X;X;X;X;X;X;X	XXXXXXXXXXXPPPPPPPPPPXXXXXXXXXX	GGS(0.468)HS(0.524)ELDS(0.008)R	5	2	-0.24663			6517	6517	2478	2158.8	2360.5	2839.8	3072.4	3003.7	2898.3	2805.3	2290
tr|A0A0P0V3W9|A0A0P0V3W9_ORYSJ;tr|A0A0P0V3W4|A0A0P0V3W4_ORYSJ;sp|Q5JKF2|RH40_ORYSJ	30;403;556	tr|A0A0P0V3W9|A0A0P0V3W9_ORYSJ	tr|A0A0P0V3W9|A0A0P0V3W9_ORYSJ	>tr|A0A0P0V3W9|A0A0P0V3W9_ORYSJ Os01g0549400 protein OS=Oryza sativa subsp. japonica OX=39947 GN=Os01g0549400 PE=4 SV=1;>tr|A0A0P0V3W4|A0A0P0V3W4_ORYSJ Os01g0549400 protein (Fragment) OS=Oryza sativa subsp. japonica OX=39947 GN=Os01g0549400 PE=3 SV=1;>sp|Q	0.983728	0.000125405	88.523	1	S	WATRSDRGGSHSELDSRYGGRDGLSGSSGRL	X;X;X;X;X;X;X;X;X;X;X;X;X;X;X;Phospho (STY);X;X;X;X;X;X;X;X;X;X;X;X;X;X;X	XXXXXXXPPPPPPPPPPXXXXXXXXXXXXXX	GGS(0.011)HS(0.005)ELDS(0.984)R	9	2	0.63494			6515;6516	6515	5534.2	4779.1	4696.1	6151.8	5820.8	5489.6	5130.2	4979.4	4496
tr|A0A0P0V3W9|A0A0P0V3W9_ORYSJ;tr|A0A0P0V3W4|A0A0P0V3W4_ORYSJ;sp|Q5JKF2|RH40_ORYSJ	227;600;753	tr|A0A0P0V3W9|A0A0P0V3W9_ORYSJ	tr|A0A0P0V3W9|A0A0P0V3W9_ORYSJ	>tr|A0A0P0V3W9|A0A0P0V3W9_ORYSJ Os01g0549400 protein OS=Oryza sativa subsp. japonica OX=39947 GN=Os01g0549400 PE=4 SV=1;>tr|A0A0P0V3W4|A0A0P0V3W4_ORYSJ Os01g0549400 protein (Fragment) OS=Oryza sativa subsp. japonica OX=39947 GN=Os01g0549400 PE=3 SV=1;>sp|Q	0.5	0.000409825	50.554	1	S	EGNNKAAEVSKNPDPSSPPHHGKTREDEEEG	X;X;X;X;X;X;X;X;X;X;X;X;X;X;X;Phospho (STY);X;X;X;X;X;X;X;X;X;X;X;X;X;X;X	XXXXXXXXXXXPPPPPPPPPPPPXXXXXXXX	NPDPS(0.5)S(0.5)PPHHGK	5	4	-0.051358			12374	12374	3986	4222.9	3880.5	4386.1	3588	3609.6	4646.2	4010.3	4807.5
tr|A0A0P0V3W9|A0A0P0V3W9_ORYSJ;tr|A0A0P0V3W4|A0A0P0V3W4_ORYSJ;sp|Q5JKF2|RH40_ORYSJ	228;601;754	tr|A0A0P0V3W9|A0A0P0V3W9_ORYSJ	tr|A0A0P0V3W9|A0A0P0V3W9_ORYSJ	>tr|A0A0P0V3W9|A0A0P0V3W9_ORYSJ Os01g0549400 protein OS=Oryza sativa subsp. japonica OX=39947 GN=Os01g0549400 PE=4 SV=1;>tr|A0A0P0V3W4|A0A0P0V3W4_ORYSJ Os01g0549400 protein (Fragment) OS=Oryza sativa subsp. japonica OX=39947 GN=Os01g0549400 PE=3 SV=1;>sp|Q	0.986909	2.36e-05	67.947	1	S	GNNKAAEVSKNPDPSSPPHHGKTREDEEEGM	X;X;X;X;X;X;X;X;X;X;X;X;X;X;X;Phospho (STY);X;X;X;X;X;X;X;X;X;X;X;X;X;X;X	XXXXXXXXXXPPPPPPPPPPPPXXXXXXXXX	NPDPS(0.013)S(0.987)PPHHGK	6	3	-0.29444			12373;12374;12375;12376;12377;12378	12373	28806	30251	29032	32520	29293	31461	31318	30081	31435
tr|A0A0P0V3W9|A0A0P0V3W9_ORYSJ;tr|A0A0P0V3W4|A0A0P0V3W4_ORYSJ;sp|Q5JKF2|RH40_ORYSJ	194;567;720	tr|A0A0P0V3W9|A0A0P0V3W9_ORYSJ	tr|A0A0P0V3W9|A0A0P0V3W9_ORYSJ	>tr|A0A0P0V3W9|A0A0P0V3W9_ORYSJ Os01g0549400 protein OS=Oryza sativa subsp. japonica OX=39947 GN=Os01g0549400 PE=4 SV=1;>tr|A0A0P0V3W4|A0A0P0V3W4_ORYSJ Os01g0549400 protein (Fragment) OS=Oryza sativa subsp. japonica OX=39947 GN=Os01g0549400 PE=3 SV=1;>sp|Q	0.771218	0.00536085	29.65	1	S	DLDRSPTPQDKSGPYSPAYNGKTSRSVSPGN	X;X;X;X;Phospho (STY);X;Phospho (STY);X;X;X;X;X;X;X;X;Phospho (STY);X;X;X;X;X;X;X;X;X;X;X;X;X;X;X	XXXXXXXXXXXPPPPPPPPPPPXXXXXXXXX	S(0.041)GPY(0.015)S(0.771)PAY(0.173)NGK	5	3	-0.10126			14690;14691;14692	14692	21925	22339	20703	22227	21772	21732	22615	24853	24278
tr|A0A0P0V3W9|A0A0P0V3W9_ORYSJ;tr|A0A0P0V3W4|A0A0P0V3W4_ORYSJ;sp|Q5JKF2|RH40_ORYSJ	183;556;709	tr|A0A0P0V3W9|A0A0P0V3W9_ORYSJ	tr|A0A0P0V3W9|A0A0P0V3W9_ORYSJ	>tr|A0A0P0V3W9|A0A0P0V3W9_ORYSJ Os01g0549400 protein OS=Oryza sativa subsp. japonica OX=39947 GN=Os01g0549400 PE=4 SV=1;>tr|A0A0P0V3W4|A0A0P0V3W4_ORYSJ Os01g0549400 protein (Fragment) OS=Oryza sativa subsp. japonica OX=39947 GN=Os01g0549400 PE=3 SV=1;>sp|Q	1	2.16e-08	85.948	1;2	S	RHPEDGKVGKVDLDRSPTPQDKSGPYSPAYN	X;X;X;X;X;X;X;X;X;X;X;X;X;X;X;Phospho (STY);X;Phospho (STY);X;X;X;X;X;X;X;X;Phospho (STY);X;X;X;X	XXXXXXXPPPPPPPPPPPPPPPXXXXXXXXX	VGKVDLDRS(1)PT(1)PQDK	9	3	0.67728			18017;18018;18019;18020;18021;18022;18023;18024;18025;18026;18027;18028;18318;18319;18320;18321;18322;18323	18323	150950	143740	140840	157050	151060	158560	145860	146580	146980
sp|Q5JL08|MON1_ORYSJ	29	sp|Q5JL08|MON1_ORYSJ	sp|Q5JL08|MON1_ORYSJ	>sp|Q5JL08|MON1_ORYSJ Vacuolar fusion protein MON1 homolog OS=Oryza sativa subsp. japonica OX=39947 GN=MON1 PE=3 SV=1	0.999991	0.00314628	28.653	1	S	GPPDSPPPEKRLASLSLRTSHLPPDFEIHDD	X;X;X;X;X;X;X;X;X;X;X;X;X;X;X;Phospho (STY);X;X;X;X;X;X;X;X;X;X;X;X;X;X;X	XXXXXXXXXXXPPPPPPPXXXXXXXXXXXXX	LASLS(1)LR	5	2	-0.41426			9785;9786;9787	9787	28927	26602	26605	18178	17991	19997	30036	30873	30590
tr|A0A0P0VC18|A0A0P0VC18_ORYSJ;tr|A0A0P0VC32|A0A0P0VC32_ORYSJ;sp|Q5JLB5|C3H12_ORYSJ	41;131;242	tr|A0A0P0VC18|A0A0P0VC18_ORYSJ	tr|A0A0P0VC18|A0A0P0VC18_ORYSJ	>tr|A0A0P0VC18|A0A0P0VC18_ORYSJ Os01g0917400 protein (Fragment) OS=Oryza sativa subsp. japonica OX=39947 GN=Os01g0917400 PE=4 SV=1;>tr|A0A0P0VC32|A0A0P0VC32_ORYSJ Os01g0917400 protein (Fragment) OS=Oryza sativa subsp. japonica OX=39947 GN=Os01g0917400 PE=4	0.999968	0.00788465	45.962	1	S	GTMASWAFPRGSFIPSPRWQNPSNYAPMIVP	X;X;X;X;X;X;X;X;X;X;X;X;X;X;X;Phospho (STY);X;X;X;X;X;X;X;X;X;X;X;X;X;X;X	XXXXXXXXXXPPPPPPPPXXXXXXXXXXXXX	GSFIPS(1)PR	6	2	2.666			7353;7354;7355	7355	34301	33738	32622	19762	20144	20154	21531	23285	22917
tr|A0A0P0VC18|A0A0P0VC18_ORYSJ;tr|A0A0P0VC32|A0A0P0VC32_ORYSJ;sp|Q5JLB5|C3H12_ORYSJ	230;320;431	tr|A0A0P0VC18|A0A0P0VC18_ORYSJ	tr|A0A0P0VC18|A0A0P0VC18_ORYSJ	>tr|A0A0P0VC18|A0A0P0VC18_ORYSJ Os01g0917400 protein (Fragment) OS=Oryza sativa subsp. japonica OX=39947 GN=Os01g0917400 PE=4 SV=1;>tr|A0A0P0VC32|A0A0P0VC32_ORYSJ Os01g0917400 protein (Fragment) OS=Oryza sativa subsp. japonica OX=39947 GN=Os01g0917400 PE=4	0.992985	5.88e-06	96.98	1	S	GSASTNVPMVRRLLQSPSASAYTS_______	X;X;X;X;X;X;X;X;X;X;X;X;X;X;X;Phospho (STY);X;X;X;X;X;X;X;X;X;X;X;X;X;X;X	XXXXXXXXXXXPPPPPPPPPPPPPXXXXXXX	RLLQS(0.993)PS(0.004)AS(0.001)AYTS(0.001)	5	2	1.7358			10531;13564;13565;13566;13567	13564	15116	14592	13646	13671	13138	12295	14277	13503	13539
tr|A0A0P0VC18|A0A0P0VC18_ORYSJ;tr|A0A0P0VC32|A0A0P0VC32_ORYSJ;sp|Q5JLB5|C3H12_ORYSJ	232;322;433	tr|A0A0P0VC18|A0A0P0VC18_ORYSJ	tr|A0A0P0VC18|A0A0P0VC18_ORYSJ	>tr|A0A0P0VC18|A0A0P0VC18_ORYSJ Os01g0917400 protein (Fragment) OS=Oryza sativa subsp. japonica OX=39947 GN=Os01g0917400 PE=4 SV=1;>tr|A0A0P0VC32|A0A0P0VC32_ORYSJ Os01g0917400 protein (Fragment) OS=Oryza sativa subsp. japonica OX=39947 GN=Os01g0917400 PE=4	0.911448	1.46e-07	105.69	1	S	ASTNVPMVRRLLQSPSASAYTS_________	X;X;X;X;X;X;X;X;X;X;X;X;X;X;X;Phospho (STY);X;X;X;X;X;X;X;X;X;X;X;X;X;X;X	XXXXXXXXXXPPPPPPPPPPPPXXXXXXXXX	LLQS(0.011)PS(0.911)AS(0.077)AYTS	6	2	0.43818			10524;10525;10528;10529;10530;10532;10533	10529	35273	35185	34191	30745	29806	29633	42852	43834	44693
tr|A0A0P0VC18|A0A0P0VC18_ORYSJ;tr|A0A0P0VC32|A0A0P0VC32_ORYSJ;sp|Q5JLB5|C3H12_ORYSJ	234;324;435	tr|A0A0P0VC18|A0A0P0VC18_ORYSJ	tr|A0A0P0VC18|A0A0P0VC18_ORYSJ	>tr|A0A0P0VC18|A0A0P0VC18_ORYSJ Os01g0917400 protein (Fragment) OS=Oryza sativa subsp. japonica OX=39947 GN=Os01g0917400 PE=4 SV=1;>tr|A0A0P0VC32|A0A0P0VC32_ORYSJ Os01g0917400 protein (Fragment) OS=Oryza sativa subsp. japonica OX=39947 GN=Os01g0917400 PE=4	0.768221	4.47e-06	95.894	1	S	TNVPMVRRLLQSPSASAYTS___________	X;X;X;X;X;X;X;X;X;X;X;X;X;X;X;Phospho (STY);X;X;X;X;X;X;X;X;X;X;X;X;X;X;X	XXXXXXXXPPPPPPPPPPPPXXXXXXXXXXX	LLQS(0.001)PS(0.229)AS(0.768)AYTS(0.001)	8	2	-0.49598			10526;10527	10527	6623.8	5834.3	5961.1	5493.8	6509.8	5888.5	8872.7	8434.2	8405
tr|A0A0P0VC18|A0A0P0VC18_ORYSJ;tr|A0A0P0VC32|A0A0P0VC32_ORYSJ;sp|Q5JLB5|C3H12_ORYSJ	84;174;285	tr|A0A0P0VC18|A0A0P0VC18_ORYSJ	tr|A0A0P0VC18|A0A0P0VC18_ORYSJ	>tr|A0A0P0VC18|A0A0P0VC18_ORYSJ Os01g0917400 protein (Fragment) OS=Oryza sativa subsp. japonica OX=39947 GN=Os01g0917400 PE=4 SV=1;>tr|A0A0P0VC32|A0A0P0VC32_ORYSJ Os01g0917400 protein (Fragment) OS=Oryza sativa subsp. japonica OX=39947 GN=Os01g0917400 PE=4	0.99978	2.44e-31	117.99	1	S	TGQMMPVSSSESRLQSPGAQQTYGTSQQVDA	X;X;X;X;X;X;X;X;X;X;X;X;X;X;X;Phospho (STY);X;X;X;X;X;X;X;X;X;X;X;X;X;X;X	XXXXXXXXXXXXXPPPPPPPPPPPPPPPPPP	LQS(1)PGAQQTYGTSQQVDASAGNQGMLSPYR	3	4	0.42313			10800;10801;10803;10806	10803	7187.2	6856.7	7115.8	6484.8	6877.6	6601.4	6931.3	7225.6	7020.9
sp|Q5JN42|PSD2_ORYSJ	56	sp|Q5JN42|PSD2_ORYSJ	sp|Q5JN42|PSD2_ORYSJ	>sp|Q5JN42|PSD2_ORYSJ Phosphatidylserine decarboxylase proenzyme 2 OS=Oryza sativa subsp. japonica OX=39947 GN=PSD2 PE=3 SV=3	0.97846	2.86e-15	100.72	1	S	RDRAGRPGGDAHASESGTGRAIAVDEFAGIA	X;X;X;X;X;X;X;X;X;X;X;X;X;X;X;Phospho (STY);X;X;X;X;X;X;X;X;X;X;X;X;X;X;X	XXXPPPPPPPPPPPPPPPPPXXXXXXXXXXX	AGRPGGDAHAS(0.006)ES(0.978)GT(0.015)GR	13	3	0.23988			794;795;796;797	794	4140.8	4614.1	4331	863.58	1059.3	1408.8	7224.6	6699.6	7315.1
sp|Q5KS50|NPH3_ORYSJ	697	sp|Q5KS50|NPH3_ORYSJ	sp|Q5KS50|NPH3_ORYSJ	>sp|Q5KS50|NPH3_ORYSJ Coleoptile phototropism protein 1 OS=Oryza sativa subsp. japonica OX=39947 GN=CPT1 PE=2 SV=1	1	0.00326963	42.881	1	S	DALQKQVDGRGGGAPSPAAAKIGKQQQQGTS	X;X;X;X;X;X;X;X;X;X;X;X;X;X;X;Phospho (STY);X;X;X;X;X;X;X;X;X;X;X;X;X;X;X	XXXXXXXXXXPPPPPPPPPPPXXXXXXXXXX	GGGAPS(1)PAAAK	6	2	-1.8012			6390;6391;6392	6392	50727	50317	48320	45171	42863	46431	45283	47190	47818
sp|Q5N749|MOR1_ORYSJ	1993	sp|Q5N749|MOR1_ORYSJ	sp|Q5N749|MOR1_ORYSJ	>sp|Q5N749|MOR1_ORYSJ Protein MOR1 OS=Oryza sativa subsp. japonica OX=39947 GN=MOR1 PE=2 SV=1	0.651564	0.0093069	40.171	1	S	ALSGLQARMERLKSGSMEPL___________	X;X;X;X;X;X;X;X;X;X;X;X;X;X;X;Phospho (STY);X;X;X;X;X;X;X;X;X;X;X;X;X;X;X	XXXXXXXXXXXPPPPPPPPPXXXXXXXXXXX	LKS(0.348)GS(0.652)MEPL	5	2	-0.903			10386	10386	8654.1	9592.5	8805.2	6848.8	6162.3	6852.6	8209.7	8693.9	9732.4
tr|A0A0N7KE50|A0A0N7KE50_ORYSJ;sp|Q5N941|POLLU_ORYSJ	10;174	tr|A0A0N7KE50|A0A0N7KE50_ORYSJ	tr|A0A0N7KE50|A0A0N7KE50_ORYSJ	>tr|A0A0N7KE50|A0A0N7KE50_ORYSJ Os01g0870100 protein OS=Oryza sativa subsp. japonica OX=39947 GN=Os01g0870100 PE=3 SV=1;>sp|Q5N941|POLLU_ORYSJ Probable ion channel POLLUX OS=Oryza sativa subsp. japonica OX=39947 GN=Os01g0870100 PE=2 SV=1	0.980997	0.0150601	17.39	1	S	______MLLDERRSLSPPPPQQRAPRFDLSP	X;X;X;X;X;X;X;X;X;X;X;X;X;X;X;Phospho (STY);X;X;X;X;X;X;X;X;X;X;X;X;X;X;X	XXXXXXXXXXXXXPPPPPPPPPPXXXXXXXX	S(0.019)LS(0.981)PPPPQQR	3	2	1.6336			15232	15232	5902.1	7048.1	6007.6	6812.2	6523.4	6486.8	6094.3	6365.3	6822.5
tr|B7F3Z8|B7F3Z8_ORYSJ;sp|Q5NAW2|C3H6_ORYSJ	459;471	tr|B7F3Z8|B7F3Z8_ORYSJ	tr|B7F3Z8|B7F3Z8_ORYSJ	>tr|B7F3Z8|B7F3Z8_ORYSJ Os01g0258700 protein OS=Oryza sativa subsp. japonica OX=39947 GN=Os01g0258700 PE=2 SV=1;>sp|Q5NAW2|C3H6_ORYSJ Zinc finger CCCH domain-containing protein 6 OS=Oryza sativa subsp. japonica OX=39947 GN=Os01g0258700 PE=2 SV=2	0.970431	2.9e-18	158.5	1	S	TMMRAQTNTTSGGSSSPGGGR__________	X;X;X;X;X;X;X;X;X;X;X;X;X;X;X;Phospho (STY);X;X;X;X;X;X;X;X;X;X;X;X;X;X;X	XXXXPPPPPPPPPPPPPPPPPXXXXXXXXXX	AQTNTTSGGSS(0.029)S(0.97)PGGGR	12	2	0.23729			1648;1649;1650;1651;1652;1653	1650	11913	11751	11466	11595	11730	11850	11541	11848	11602
sp|Q5NBT9|TPR1_ORYSJ	213	sp|Q5NBT9|TPR1_ORYSJ	sp|Q5NBT9|TPR1_ORYSJ	>sp|Q5NBT9|TPR1_ORYSJ Protein TPR1 OS=Oryza sativa subsp. japonica OX=39947 GN=TPR1 PE=1 SV=1	0.990392	1.57e-08	123.81	1	S	LFTDHTCTPPNGARASPVSVPLAAVPKAGGT	X;X;X;X;X;X;X;X;X;X;X;X;X;X;X;Phospho (STY);X;X;X;X;X;X;X;X;X;X;X;X;X;X;X	XXXXXXXXXXXXXXPPPPPPPPPPPPPXXXX	AS(0.99)PVS(0.01)VPLAAVPK	2	2	-0.03752			1829;1830;1831;1832;1833;1834	1834	32701	32852	31315	29186	27942	28594	33753	35004	33205
sp|Q5NBT9|TPR1_ORYSJ	731	sp|Q5NBT9|TPR1_ORYSJ	sp|Q5NBT9|TPR1_ORYSJ	>sp|Q5NBT9|TPR1_ORYSJ Protein TPR1 OS=Oryza sativa subsp. japonica OX=39947 GN=TPR1 PE=1 SV=1	1	0.00282469	57.924	1	S	GGDPASRSIDIKPRISEERPDKAKPWELMEV	X;X;X;X;X;X;X;X;X;X;X;X;X;X;X;Phospho (STY);X;X;X;X;X;X;X;X;X;X;X;X;X;X;X	XXXXXXXXXXXXXXPPPPPPPPXXXXXXXXX	IS(1)EERPDK	2	2	-0.019251			8642;8643;8644;8645;8646;8647	8647	80593	80525	75808	76026	67093	71751	88554	87771	83995
sp|Q5NBT9|TPR1_ORYSJ	1116	sp|Q5NBT9|TPR1_ORYSJ	sp|Q5NBT9|TPR1_ORYSJ	>sp|Q5NBT9|TPR1_ORYSJ Protein TPR1 OS=Oryza sativa subsp. japonica OX=39947 GN=TPR1 PE=1 SV=1	0.283019	1.93e-10	76.84		S	TPPTENGVPNGRTSTSSATSNPAADQIQR__	X;X;X;X;X;X;X;X;X;X;X;X;X;X;X;Phospho (STY);X;X;X;X;X;X;X;X;X;X;X;X;X;X;X	XXXXXXXXXXXXPPPPPPPPPPPPPPPPPXX	T(0.017)S(0.049)T(0.18)S(0.283)S(0.283)AT(0.094)S(0.094)NPAADQIQR	4	2	0.45132				17473	0	0	0	0	0	0	0	0	0
sp|Q5NBT9|TPR1_ORYSJ	1117	sp|Q5NBT9|TPR1_ORYSJ	sp|Q5NBT9|TPR1_ORYSJ	>sp|Q5NBT9|TPR1_ORYSJ Protein TPR1 OS=Oryza sativa subsp. japonica OX=39947 GN=TPR1 PE=1 SV=1	0.283019	1.93e-10	76.84		S	PPTENGVPNGRTSTSSATSNPAADQIQR___	X;X;X;X;X;X;X;X;X;X;X;X;X;X;X;X;X;X;X;X;X;X;X;X;X;X;X;X;X;X;X	XXXXXXXXXXXXXXXXXXXXXXXXXXXXXXX	T(0.017)S(0.049)T(0.18)S(0.283)S(0.283)AT(0.094)S(0.094)NPAADQIQR	5	2	0.45132				17473	0	0	0	0	0	0	0	0	0
sp|Q5NBT9|TPR1_ORYSJ	1120	sp|Q5NBT9|TPR1_ORYSJ	sp|Q5NBT9|TPR1_ORYSJ	>sp|Q5NBT9|TPR1_ORYSJ Protein TPR1 OS=Oryza sativa subsp. japonica OX=39947 GN=TPR1 PE=1 SV=1	0.819218	6.78e-18	141.36	1	S	ENGVPNGRTSTSSATSNPAADQIQR______	X;X;X;X;X;X;X;X;X;X;X;X;X;X;X;Phospho (STY);X;X;X;X;X;X;X;X;X;X;X;X;X;X;X	XXXXXXXXPPPPPPPPPPPPPPPPPXXXXXX	TSTSS(0.001)AT(0.179)S(0.819)NPAADQIQR	8	2	0.78025			17472	17472	2312.8	2282.9	2026.4	1642.3	2167.2	1977.3	2832.6	2795.4	2494.9
sp|Q5QN75|M2K1_ORYSJ	354	sp|Q5QN75|M2K1_ORYSJ	sp|Q5QN75|M2K1_ORYSJ	>sp|Q5QN75|M2K1_ORYSJ Mitogen-activated protein kinase kinase 1 OS=Oryza sativa subsp. japonica OX=39947 GN=MKK1 PE=1 SV=1	0.999542	0.002843	25.008	1	S	DLRILVESLEPPMNISE______________	X;X;X;X;X;X;X;X;X;X;X;X;X;X;X;Phospho (STY);X;X;X;X;X;X;X;X;X;X;X;X;X;X;X	XXXPPPPPPPPPPPPPPXXXXXXXXXXXXXX	ILVESLEPPMNIS(1)E	13	3	0.45386			8487	8487	0	220.97	73.938	88.11	110.8	63.008	172.39	159.84	131.53
sp|Q5SMK6|P2C54_ORYSJ	344	sp|Q5SMK6|P2C54_ORYSJ	sp|Q5SMK6|P2C54_ORYSJ	>sp|Q5SMK6|P2C54_ORYSJ Probable protein phosphatase 2C 54 OS=Oryza sativa subsp. japonica OX=39947 GN=Os06g0179700 PE=2 SV=1	0.830554	0.000188267	70.634	1	S	APPQVRVSRPGRVARSISAEGLNSLRTLLRN	X;X;X;X;X;X;X;X;X;X;X;X;X;X;X;Phospho (STY);X;X;X;X;X;X;X;X;X;X;X;X;X;X;X	XXXXXXXXXXXXXXXPPPPPPPPPPPXXXXX	S(0.831)IS(0.164)AEGLNS(0.006)LR	1	2	-0.019008			14935;14937	14935	14964	13415	14808	12949	12192	12196	15140	14622	14234
sp|Q5SMK6|P2C54_ORYSJ	346	sp|Q5SMK6|P2C54_ORYSJ	sp|Q5SMK6|P2C54_ORYSJ	>sp|Q5SMK6|P2C54_ORYSJ Probable protein phosphatase 2C 54 OS=Oryza sativa subsp. japonica OX=39947 GN=Os06g0179700 PE=2 SV=1	0.498588	0.00390016	40.022		S	PQVRVSRPGRVARSISAEGLNSLRTLLRNQ_	X;X;X;X;X;X;X;X;X;X;X;X;X;X;X;X;X;X;X;X;X;X;X;X;X;X;X;X;X;X;X	XXXXXXXXXXXXXXXXXXXXXXXXXXXXXXX	S(0.499)IS(0.499)AEGLNS(0.003)LR	3	2	-0.36205				14936	0	0	0	0	0	0	0	0	0
sp|Q5SMK6|P2C54_ORYSJ	37	sp|Q5SMK6|P2C54_ORYSJ	sp|Q5SMK6|P2C54_ORYSJ	>sp|Q5SMK6|P2C54_ORYSJ Probable protein phosphatase 2C 54 OS=Oryza sativa subsp. japonica OX=39947 GN=Os06g0179700 PE=2 SV=1	0.99953	0.00660564	34.155	1	S	ADAGKSKSKSPDELPSPRMERVCENTTAADF	X;X;X;X;X;X;X;X;X;X;X;X;X;X;X;Phospho (STY);X;X;X;X;X;X;X;X;X;X;X;X;X;X;X	XXXXXXXPPPPPPPPPPPXXXXXXXXXXXXX	SKSPDELPS(1)PR	9	3	1.1238			15063	15063	16796	18206	17654	16661	17176	16672	16655	16218	17030
sp|Q5SMQ9|PIN1A_ORYSJ	183	sp|Q5SMQ9|PIN1A_ORYSJ	sp|Q5SMQ9|PIN1A_ORYSJ	>sp|Q5SMQ9|PIN1A_ORYSJ Auxin efflux carrier component 1a OS=Oryza sativa subsp. japonica OX=39947 GN=PIN1A PE=2 SV=1	0.940168	6.95e-10	64.34	1	S	TAANIASIVVDPDVVSLDGRRDAIETETEVK	X;X;X;X;X;X;X;X;X;X;X;X;X;X;X;Phospho (STY);X;X;X;X;X;X;X;X;X;X;X;X;X;X;X	PPPPPPPPPPPPPPPPPPPPXXXXXXXXXXX	MLITEQFPDTAANIAS(0.06)IVVDPDVVS(0.94)LDGR	25	3	-0.90326			11688	11688	0	115.62	0	0	0	0	0	0	0
sp|Q5VM82|ZHD5_ORYSJ	154	sp|Q5VM82|ZHD5_ORYSJ	sp|Q5VM82|ZHD5_ORYSJ	>sp|Q5VM82|ZHD5_ORYSJ Zinc-finger homeodomain protein 5 OS=Oryza sativa subsp. japonica OX=39947 GN=ZHD5 PE=3 SV=1	1	0.00218231	55.654	1	S	TGTTTASSSDERLRPSPVQPRRRSRTTFTRE	X;X;X;X;X;X;X;X;X;X;X;X;X;X;X;Phospho (STY);X;X;X;X;X;X;X;X;X;X;X;X;X;X;X	XXXXXXXXXXXXPPPPPPPPPXXXXXXXXXX	LRPS(1)PVQPR	4	2	-0.31898			10821;10822;10823;10824	10824	31045	38326	30224	35620	32008	35360	30482	30402	32264
sp|Q5VMI0|CGT_ORYSJ	3	sp|Q5VMI0|CGT_ORYSJ	sp|Q5VMI0|CGT_ORYSJ	>sp|Q5VMI0|CGT_ORYSJ UDP-glucose:2-hydroxyflavanone C-glucosyltransferase OS=Oryza sativa subsp. japonica OX=39947 GN=CGT PE=3 SV=1	0.664907	0.0262179	29.224	1	S	_____________MPSSGDAAGRRPHVVLIP	X;X;X;X;X;X;X;X;X;X;X;X;X;X;X;Phospho (STY);X;X;X;X;X;X;X;X;X;X;X;X;X;X;X	XXXXXXXXXXXXXXPPPPPPPPPXXXXXXXX	PS(0.665)S(0.335)GDAAGR	2	2	0.54949			12764	12764	5052.4	4573.3	5544.5	5071.2	4433.1	4584.2	6256.6	6053	6061.7
sp|Q5Z627|EF1G3_ORYSJ	246	sp|Q5Z627|EF1G3_ORYSJ	sp|Q5Z627|EF1G3_ORYSJ	>sp|Q5Z627|EF1G3_ORYSJ Elongation factor 1-gamma 3 OS=Oryza sativa subsp. japonica OX=39947 GN=Os06g0571400 PE=2 SV=1	1	1.59e-08	82.638	1	S	KKEAPKEAPKPKVEASEEEEAPKPKPKNPLD	X;X;X;X;X;X;X;X;X;X;X;X;X;X;X;Phospho (STY);X;X;X;X;X;X;X;X;X;X;X;X;X;X;X	XXXXXXXXXXXXPPPPPPPPPPPPPPPXXXX	VEAS(1)EEEEAPKPKPK	4	4	-0.93316			18092;18093;18094	18094	30803	35272	27656	32816	27010	27735	31655	31838	31719
sp|Q5Z6F0|TIP22_ORYSJ	245	sp|Q5Z6F0|TIP22_ORYSJ	sp|Q5Z6F0|TIP22_ORYSJ	>sp|Q5Z6F0|TIP22_ORYSJ Probable aquaporin TIP2-2 OS=Oryza sativa subsp. japonica OX=39947 GN=TIP2-2 PE=2 SV=1	0.859822	2.58e-09	78.612	1	S	VYRYVYMCGDHAPVASSEF____________	X;X;X;X;X;X;Oxidation (M);X;X;X;X;X;X;X;X;Phospho (STY);X;X;X;X;X;X;X;X;X;X;X;X;X;X;X	XXXPPPPPPPPPPPPPPPPXXXXXXXXXXXX	YVYMCGDHAPVAS(0.86)S(0.14)EF	13	2	-0.53962			20163;20164;20165;20166;20167;20168;20169;20170;20171	20170	21619	22720	19720	34271	32184	35741	21474	23486	22804
sp|Q5Z6F0|TIP22_ORYSJ	246	sp|Q5Z6F0|TIP22_ORYSJ	sp|Q5Z6F0|TIP22_ORYSJ	>sp|Q5Z6F0|TIP22_ORYSJ Probable aquaporin TIP2-2 OS=Oryza sativa subsp. japonica OX=39947 GN=TIP2-2 PE=2 SV=1	0.5	2.2e-07	69.797	1	S	YRYVYMCGDHAPVASSEF_____________	X;X;X;X;X;X;X;X;X;X;X;X;X;X;X;X;X;X;X;X;X;X;X;X;X;X;X;X;X;X;X	XXXXXXXXXXXXXXXXXXXXXXXXXXXXXXX	YVYMCGDHAPVAS(0.5)S(0.5)EF	14	3	0.68823			20163;20164;20165;20166;20168;20169;20171	20171	18102	19228	17133	25458	22886	26549	17446	19694	18308
tr|A0A0P0WWD2|A0A0P0WWD2_ORYSJ;sp|Q5Z754|CDKF1_ORYSJ	362;455	tr|A0A0P0WWD2|A0A0P0WWD2_ORYSJ	tr|A0A0P0WWD2|A0A0P0WWD2_ORYSJ	>tr|A0A0P0WWD2|A0A0P0WWD2_ORYSJ Os06g0334400 protein (Fragment) OS=Oryza sativa subsp. japonica OX=39947 GN=Os06g0334400 PE=4 SV=1;>sp|Q5Z754|CDKF1_ORYSJ Cyclin-dependent kinase F-1 OS=Oryza sativa subsp. japonica OX=39947 GN=CDKF-1 PE=2 SV=1	0.929784	8.38e-08	66.16	1	S	DDDSTEEWANFRGGDSDSDFDEFGSMDVTKT	X;X;X;X;X;X;X;X;X;X;X;X;X;X;X;Phospho (STY);X;X;X;X;X;X;X;X;X;X;X;X;X;X;X	XXXXXXXXXXXXPPPPPPPPPPPPPPPPPPX	GGDS(0.93)DS(0.07)DFDEFGSMDVTK	4	3	-1.3907			6353;6354	6354	3307.6	4534.1	3220.9	4118.2	3240.9	3339.9	3559.9	3494.2	3817.5
tr|A0A0P0X111|A0A0P0X111_ORYSJ;sp|Q5Z9J0|MPK12_ORYSJ;tr|A0A0P0X0N8|A0A0P0X0N8_ORYSJ	470;540;177	tr|A0A0P0X111|A0A0P0X111_ORYSJ	tr|A0A0P0X111|A0A0P0X111_ORYSJ	>tr|A0A0P0X111|A0A0P0X111_ORYSJ Mitogen-activated protein kinase (Fragment) OS=Oryza sativa subsp. japonica OX=39947 GN=Os06g0708000 PE=4 SV=1;>sp|Q5Z9J0|MPK12_ORYSJ Mitogen-activated protein kinase 12 OS=Oryza sativa subsp. japonica OX=39947 GN=MPK12 PE=1	0.899453	0.00278689	45.429	1	S	VTSTDLSSRSYLKSASISASKCVAVKDNKEP	X;X;X;X;X;X;X;X;X;X;X;X;X;X;X;Phospho (STY);X;X;X;X;X;X;X;X;X;X;X;X;X;X;X	XXXXXXXXXXXXXPPPPPPPPXXXXXXXXXX	S(0.072)AS(0.899)IS(0.025)AS(0.003)K	3	2	0.062461			14202;14205;14206;14207	14202	37077	34059	36683	36438	37708	37859	34490	33771	32920
tr|A0A0P0X111|A0A0P0X111_ORYSJ;sp|Q5Z9J0|MPK12_ORYSJ;tr|A0A0P0X0N8|A0A0P0X0N8_ORYSJ	472;542;179	tr|A0A0P0X111|A0A0P0X111_ORYSJ	tr|A0A0P0X111|A0A0P0X111_ORYSJ	>tr|A0A0P0X111|A0A0P0X111_ORYSJ Mitogen-activated protein kinase (Fragment) OS=Oryza sativa subsp. japonica OX=39947 GN=Os06g0708000 PE=4 SV=1;>sp|Q5Z9J0|MPK12_ORYSJ Mitogen-activated protein kinase 12 OS=Oryza sativa subsp. japonica OX=39947 GN=MPK12 PE=1	0.388889	0.00278689	42.766		S	STDLSSRSYLKSASISASKCVAVKDNKEPED	X;X;X;X;X;X;X;X;X;X;X;X;X;X;X;Phospho (STY);X;X;X;X;X;X;X;X;X;X;X;X;X;X;X	XXXXXXXXXXXPPPPPPPPXXXXXXXXXXXX	S(0.175)AS(0.3)IS(0.389)AS(0.137)K	5	2	0.2433				14204	0	0	0	0	0	0	0	0	0
sp|Q5Z9S8|AB42G_ORYSJ	873	sp|Q5Z9S8|AB42G_ORYSJ	sp|Q5Z9S8|AB42G_ORYSJ	>sp|Q5Z9S8|AB42G_ORYSJ ABC transporter G family member 42 OS=Oryza sativa subsp. japonica OX=39947 GN=ABCG42 PE=2 SV=1	1	2.67e-06	85.919	1;2	S	ARLSNSSSNGVSRLMSIGSNEAGPRRGMVLP	X;X;X;X;X;X;X;X;X;X;X;X;X;X;X;Phospho (STY);X;X;Phospho (STY);X;X;X;X;X;X;X;X;X;X;X;X	XXXXXXXXXXXXXPPPPPPPPPPPPXXXXXX	LMS(1)IGS(1)NEAGPR	3	2	-0.79378			10594;10595;10596;10597;10598;10599;10600;10601	10601	58276	57909	55346	51090	48295	52040	63315	64134	63119
sp|Q5Z9S8|AB42G_ORYSJ	876	sp|Q5Z9S8|AB42G_ORYSJ	sp|Q5Z9S8|AB42G_ORYSJ	>sp|Q5Z9S8|AB42G_ORYSJ ABC transporter G family member 42 OS=Oryza sativa subsp. japonica OX=39947 GN=ABCG42 PE=2 SV=1	1	3.47e-06	61.544	2	S	SNSSSNGVSRLMSIGSNEAGPRRGMVLPFTP	X;X;X;X;X;X;X;X;X;X;X;X;Phospho (STY);X;X;Phospho (STY);X;X;X;X;X;X;X;X;X;X;X;X;X;X;X	XXXXXXXXXXPPPPPPPPPPPPXXXXXXXXX	LMS(1)IGS(1)NEAGPR	6	2	-0.79378			10600;10601	10601	7785.7	7674.7	6776.1	6391.4	6188.3	6556.6	6782.7	7511.1	7319.5
sp|Q5ZAJ0|RBOHB_ORYSJ	121	sp|Q5ZAJ0|RBOHB_ORYSJ	sp|Q5ZAJ0|RBOHB_ORYSJ	>sp|Q5ZAJ0|RBOHB_ORYSJ Respiratory burst oxidase homolog protein B OS=Oryza sativa subsp. japonica OX=39947 GN=RBOHB PE=1 SV=1	0.969885	3.59e-05	70.701	1	S	VTNGLKMKSSSRKAPSPQAQQSAKRVRKRLD	X;X;X;X;X;X;X;X;X;X;X;X;X;X;X;Phospho (STY);X;X;X;X;X;X;X;X;X;X;X;X;X;X;X	XXXXXXXXXXXXPPPPPPPPPPPPXXXXXXX	KAPS(0.97)PQAQQS(0.03)AK	4	3	0.35201			8941	8941	11440	10962	10668	9038.5	9012.4	9895.1	11443	11832	12671
sp|Q5ZAJ0|RBOHB_ORYSJ	32	sp|Q5ZAJ0|RBOHB_ORYSJ	sp|Q5ZAJ0|RBOHB_ORYSJ	>sp|Q5ZAJ0|RBOHB_ORYSJ Respiratory burst oxidase homolog protein B OS=Oryza sativa subsp. japonica OX=39947 GN=RBOHB PE=1 SV=1	0.978111	1.68e-08	51.054	1	S	NSTRSQDDAATLIPNSGNLGSSNRSTKTARF	X;X;X;X;X;X;X;X;X;X;X;X;X;X;X;Phospho (STY);X;X;X;X;X;X;X;X;X;X;X;X;X;X;X	XXXXPPPPPPPPPPPPPPPPPPPPXXXXXXX	SQDDAATLIPNS(0.978)GNLGS(0.016)S(0.006)NR	12	3	1.5301			15571;15573;15575	15571	8699.7	9669	9204.7	9552.4	9200.3	9554.6	8802.7	9341.4	9216
sp|Q5ZAJ0|RBOHB_ORYSJ	38	sp|Q5ZAJ0|RBOHB_ORYSJ	sp|Q5ZAJ0|RBOHB_ORYSJ	>sp|Q5ZAJ0|RBOHB_ORYSJ Respiratory burst oxidase homolog protein B OS=Oryza sativa subsp. japonica OX=39947 GN=RBOHB PE=1 SV=1	0.754516	6.67e-13	68.484	1	S	DDAATLIPNSGNLGSSNRSTKTARFKDDDEL	X;X;X;X;X;X;X;X;X;X;X;X;X;X;X;Phospho (STY);X;X;X;X;X;X;X;X;X;X;X;X;X;X;X	PPPPPPPPPPPPPPPPPPXXXXXXXXXXXXX	SQDDAATLIPNS(0.001)GNLGS(0.244)S(0.755)NR	18	3	0.023703			15572;15574	15574	9184.2	9727.9	8518.9	8956.3	7890.7	9085	9347.3	9518.7	9258.2
sp|Q5ZAJ0|RBOHB_ORYSJ	140	sp|Q5ZAJ0|RBOHB_ORYSJ	sp|Q5ZAJ0|RBOHB_ORYSJ	>sp|Q5ZAJ0|RBOHB_ORYSJ Respiratory burst oxidase homolog protein B OS=Oryza sativa subsp. japonica OX=39947 GN=RBOHB PE=1 SV=1	0.977583	8.09e-05	78.873	1	S	QQSAKRVRKRLDRTKSSAAVALKGLQFVTAK	X;X;X;X;X;X;X;X;X;X;X;X;X;X;X;Phospho (STY);X;X;X;X;X;X;X;X;X;X;X;X;X;X;X	XXXXXXXXXXXXXPPPPPPPPPPXXXXXXXX	S(0.978)S(0.022)AAVALK	1	2	0.97098			15651;15652;15653;17033;17034;17035;17036	15653	76826	74732	71484	58553	56274	58105	69542	67426	69620
sp|Q5ZAJ0|RBOHB_ORYSJ	141	sp|Q5ZAJ0|RBOHB_ORYSJ	sp|Q5ZAJ0|RBOHB_ORYSJ	>sp|Q5ZAJ0|RBOHB_ORYSJ Respiratory burst oxidase homolog protein B OS=Oryza sativa subsp. japonica OX=39947 GN=RBOHB PE=1 SV=1	0.430189	0.000145726	68.851		S	QSAKRVRKRLDRTKSSAAVALKGLQFVTAKV	X;X;X;X;X;X;X;X;X;X;X;X;X;X;X;Phospho (STY);X;X;X;X;X;X;X;X;X;X;X;X;X;X;X	XXXXXXXXXXXXPPPPPPPPPPXXXXXXXXX	T(0.196)KS(0.374)S(0.43)AAVALK	4	3	1.641				17037	0	0	0	0	0	0	0	0	0
sp|Q5ZAJ0|RBOHB_ORYSJ	682	sp|Q5ZAJ0|RBOHB_ORYSJ	sp|Q5ZAJ0|RBOHB_ORYSJ	>sp|Q5ZAJ0|RBOHB_ORYSJ Respiratory burst oxidase homolog protein B OS=Oryza sativa subsp. japonica OX=39947 GN=RBOHB PE=1 SV=1	0.999097	2.61e-17	106.85	1	S	RTVFSEACRPPTEGESGLLRADLSKGITDEK	X;X;X;X;X;X;X;X;X;X;X;X;X;X;X;Phospho (STY);X;X;X;X;X;X;X;X;X;X;X;X;X;X;X	XPPPPPPPPPPPPPPPPPPPXXXXXXXXXXX	TVFSEACRPPT(0.001)EGES(0.999)GLLR	15	3	-0.45646			17602;17603;17604;17605	17602	33113	31831	30932	28185	28187	29362	36742	35285	36352
sp|Q5ZCK5|CML16_ORYSJ	62	sp|Q5ZCK5|CML16_ORYSJ	sp|Q5ZCK5|CML16_ORYSJ	>sp|Q5ZCK5|CML16_ORYSJ Probable calcium-binding protein CML16 OS=Oryza sativa subsp. japonica OX=39947 GN=CML16 PE=2 SV=1	0.715701	0.00470244	21.446	1	S	ELAAVTRAIAPPPSESAGGREVAAMMNELDT	X;X;X;X;X;X;X;X;X;X;X;X;X;X;X;Phospho (STY);X;X;X;X;X;X;X;X;X;X;X;X;X;X;X	XXXXXXXPPPPPPPPPPPPPXXXXXXXXXXX	AIAPPPS(0.284)ES(0.716)AGGR	9	2	1.5131			913	913	7902.5	6701	6877.8	7195	6758.4	7627	10083	9687.1	10084
sp|Q5ZCK5|CML16_ORYSJ	44	sp|Q5ZCK5|CML16_ORYSJ	sp|Q5ZCK5|CML16_ORYSJ	>sp|Q5ZCK5|CML16_ORYSJ Probable calcium-binding protein CML16 OS=Oryza sativa subsp. japonica OX=39947 GN=CML16 PE=2 SV=1	0.999822	4.25e-25	195.81	1	S	ERVFTRFDADGDGRISPSELAAVTRAIAPPP	X;X;X;X;X;X;X;X;X;X;X;X;X;X;X;Phospho (STY);X;X;X;X;X;X;X;X;X;X;X;X;X;X;X	XXXXXXPPPPPPPPPPPPPPPPPPPXXXXXX	FDADGDGRIS(1)PSELAAVTR	10	2	0.42514			5210;5211;5212;5213;5214;5215;5216;5217;5218;5219;5220;5221;5222;5223;5224	5216	73989	73194	71224	103100	103340	108070	97158	96426	99593
sp|Q60E60|NADK3_ORYSJ	488	sp|Q60E60|NADK3_ORYSJ	sp|Q60E60|NADK3_ORYSJ	>sp|Q60E60|NADK3_ORYSJ Putative NAD kinase 3 OS=Oryza sativa subsp. japonica OX=39947 GN=Os05g0388400 PE=3 SV=2	0.896387	0.0286338	43.442	1	S	RSIHEGLHWNLRKSQSFDGPVA_________	X;X;X;X;X;X;X;X;X;X;X;X;X;X;X;Phospho (STY);X;X;X;X;X;X;X;X;X;X;X;X;X;X;X	XXXXXXXXXXXXPPPPPPPPPPXXXXXXXXX	KS(0.104)QS(0.896)FDGPVA	4	2	0.42129			9497;9498	9497	15807	15887	15989	15550	15663	16222	14184	16363	16974
sp|Q60EH4|COI1B_ORYSJ	16	sp|Q60EH4|COI1B_ORYSJ	sp|Q60EH4|COI1B_ORYSJ	>sp|Q60EH4|COI1B_ORYSJ Coronatine-insensitive protein homolog 1b OS=Oryza sativa subsp. japonica OX=39947 GN=COI1B PE=1 SV=1	0.966158	1.76e-06	48.759	1	S	MGGEAPEARRLDRAMSFGGAGSIPEEALHLV	X;X;X;X;X;X;X;X;X;X;X;X;X;X;X;Phospho (STY);X;X;X;X;X;X;X;X;X;X;X;X;X;X;X	XXXXXXXXXXXXXPPPPPPPPPPPPPPPPPP	AMS(0.966)FGGAGS(0.034)IPEEALHLVLGYVDDPR	3	3	0.74219			1349	1349	285.15	281.88	149.57	136.76	354.32	347.81	271.85	356.97	93.685
sp|Q60EX6|BSL1_ORYSJ	841	sp|Q60EX6|BSL1_ORYSJ	sp|Q60EX6|BSL1_ORYSJ	>sp|Q60EX6|BSL1_ORYSJ Serine/threonine-protein phosphatase BSL1 homolog OS=Oryza sativa subsp. japonica OX=39947 GN=BSL1 PE=1 SV=1	0.975132	6.04e-12	75.767	1;2	S	VIVPKLIHPLPPPVNSPESSPERAMDATWMQ	X;X;X;X;X;X;X;X;X;X;X;X;X;X;X;Phospho (STY);X;X;Phospho (STY);X;X;X;X;X;X;X;X;X;X;X;X	XXXXXPPPPPPPPPPPPPPPPPPXXXXXXXX	LIHPLPPPVNS(0.975)PES(0.512)S(0.512)PER	11	3	-1.0334			10285;10286;10287;10288;10289;10290	10289	18652	18503	17517	17397	16210	18631	19228	19624	19511
sp|Q60EX6|BSL1_ORYSJ	844	sp|Q60EX6|BSL1_ORYSJ	sp|Q60EX6|BSL1_ORYSJ	>sp|Q60EX6|BSL1_ORYSJ Serine/threonine-protein phosphatase BSL1 homolog OS=Oryza sativa subsp. japonica OX=39947 GN=BSL1 PE=1 SV=1	0.558418	3.41e-08	59.531	2	S	PKLIHPLPPPVNSPESSPERAMDATWMQELN	X;X;X;X;X;X;X;X;X;X;X;X;Phospho (STY);X;X;Phospho (STY);X;X;X;X;X;X;X;X;X;X;X;X;X;X;X	XXPPPPPPPPPPPPPPPPPPXXXXXXXXXXX	LIHPLPPPVNS(0.883)PES(0.558)S(0.558)PER	14	3	-0.46511			10288;10289;10290	10288	7271.9	7407	6937.9	7235.5	6252.4	7911.3	7529.7	7945.7	8089
sp|Q60EX6|BSL1_ORYSJ	845	sp|Q60EX6|BSL1_ORYSJ	sp|Q60EX6|BSL1_ORYSJ	>sp|Q60EX6|BSL1_ORYSJ Serine/threonine-protein phosphatase BSL1 homolog OS=Oryza sativa subsp. japonica OX=39947 GN=BSL1 PE=1 SV=1	0.558418	3.41e-08	59.531	2	S	KLIHPLPPPVNSPESSPERAMDATWMQELNI	X;X;X;X;X;X;X;X;X;X;X;X;X;X;X;X;X;X;X;X;X;X;X;X;X;X;X;X;X;X;X	XXXXXXXXXXXXXXXXXXXXXXXXXXXXXXX	LIHPLPPPVNS(0.883)PES(0.558)S(0.558)PER	15	3	-0.46511			10288;10289;10290	10288	7271.9	7407	6937.9	7235.5	6252.4	7911.3	7529.7	7945.7	8089
sp|Q60EX6|BSL1_ORYSJ	493	sp|Q60EX6|BSL1_ORYSJ	sp|Q60EX6|BSL1_ORYSJ	>sp|Q60EX6|BSL1_ORYSJ Serine/threonine-protein phosphatase BSL1 homolog OS=Oryza sativa subsp. japonica OX=39947 GN=BSL1 PE=1 SV=1	0.999985	1.42e-07	96.73	1	S	SKEAVGDLGCLVRQLSLDQFENESRRMHPSS	X;X;X;X;X;X;X;X;X;X;X;X;X;X;X;Phospho (STY);X;X;X;X;X;X;X;X;X;X;X;X;X;X;X	XXXXXXXXXXXXXPPPPPPPPPPPPXXXXXX	QLS(1)LDQFENESR	3	2	-0.47637			13004;13005;13006	13006	13972	13800	12302	10790	10858	11032	16682	16361	16651
sp|Q651A1|LPA1H_ORYSJ	690	sp|Q651A1|LPA1H_ORYSJ	sp|Q651A1|LPA1H_ORYSJ	>sp|Q651A1|LPA1H_ORYSJ P-loop NTPase domain-containing protein LPA1 homolog OS=Oryza sativa subsp. japonica OX=39947 GN=Os09g0572200 PE=3 SV=1	0.962556	0.00217288	40.104	1	S	RWKRSLSESFRSRPRSAPSLVELTPKHKGSA	X;X;X;X;X;X;X;X;X;X;X;X;X;X;X;Phospho (STY);X;X;X;X;X;X;X;X;X;X;X;X;X;X;X	XXXXXXXXXXXXXXXPPPPPPPPPPPXXXXX	S(0.963)APS(0.037)LVELTPK	1	3	-0.9588			14132;14133	14133	14132	13512	13296	15789	14479	14288	12328	12215	11769
sp|Q651D5|PIP27_ORYSJ	282	sp|Q651D5|PIP27_ORYSJ	sp|Q651D5|PIP27_ORYSJ	>sp|Q651D5|PIP27_ORYSJ Probable aquaporin PIP2-7 OS=Oryza sativa subsp. japonica OX=39947 GN=PIP2-7 PE=2 SV=2	0.892322	5.96e-05	68.29	2	S	YHKLVLRGEAAKALSSFRSTSVTA_______	X;X;X;X;X;X;X;X;X;X;X;X;X;X;X;Phospho (STY);X;X;Phospho (STY);Phospho (STY);Phospho (STY);X;X;X;X;X;X;X;X;X;X	XXXXXXXXXXXXPPPPPPPPPPPPXXXXXXX	ALS(0.101)S(0.892)FRS(0.081)T(0.424)S(0.187)VT(0.315)A	4	2	-1.1318			1247;1248;1249;1250;1251;1252	1252	19844	22015	20746	68763	70313	71379	37924	37970	36028
sp|Q651D5|PIP27_ORYSJ	285	sp|Q651D5|PIP27_ORYSJ	sp|Q651D5|PIP27_ORYSJ	>sp|Q651D5|PIP27_ORYSJ Probable aquaporin PIP2-7 OS=Oryza sativa subsp. japonica OX=39947 GN=PIP2-7 PE=2 SV=2	0.827705	7.43e-06	79.614	1	S	LVLRGEAAKALSSFRSTSVTA__________	X;X;X;X;X;X;X;X;X;X;X;X;Phospho (STY);X;X;Phospho (STY);X;X;X;X;X;X;X;X;X;X;X;X;X;X;X	XXXXXXXXXPPPPPPPPPPPPXXXXXXXXXX	ALSS(0.003)FRS(0.828)T(0.149)S(0.016)VT(0.004)A	7	2	0.56226			1242;1243;1244;1245;1246	1242	22503	22137	21005	25316	25529	26893	35701	38896	39104
sp|Q651D5|PIP27_ORYSJ	287	sp|Q651D5|PIP27_ORYSJ	sp|Q651D5|PIP27_ORYSJ	>sp|Q651D5|PIP27_ORYSJ Probable aquaporin PIP2-7 OS=Oryza sativa subsp. japonica OX=39947 GN=PIP2-7 PE=2 SV=2	0.35086	0.000343212	54.603		S	LRGEAAKALSSFRSTSVTA____________	X;X;X;X;X;X;X;X;X;X;Phospho (STY);X;X;X;X;Phospho (STY);X;X;X;X;X;X;X;X;X;X;X;X;X;X;X	XXXXXXXPPPPPPPPPPPPXXXXXXXXXXXX	ALS(0.215)S(0.736)FRS(0.093)T(0.226)S(0.351)VT(0.38)A	9	2	-0.42172				1249	0	0	0	0	0	0	0	0	0
sp|Q658H5|SPXM3_ORYSJ	501	sp|Q658H5|SPXM3_ORYSJ	sp|Q658H5|SPXM3_ORYSJ	>sp|Q658H5|SPXM3_ORYSJ SPX domain-containing membrane protein Os06g0129400 OS=Oryza sativa subsp. japonica OX=39947 GN=Os06g0129400 PE=2 SV=1	0.996468	0.000872056	48.053	1	S	EEGTHDSRKPATSIGSAYRLLTPSVKVQLLI	X;X;X;X;X;X;X;X;X;X;X;X;X;X;X;Phospho (STY);X;X;X;X;X;X;X;X;X;X;X;X;X;X;X	XXXXXXXXPPPPPPPPPPPXXXXXXXXXXXX	KPATS(0.003)IGS(0.996)AYR	8	3	1.0354			9283	9283	8832.3	8795.9	8198.1	8136	7943.2	7998.2	9564.6	9013.2	9091.2
sp|Q65XV8|RK176_ORYSJ	20	sp|Q65XV8|RK176_ORYSJ	sp|Q65XV8|RK176_ORYSJ	>sp|Q65XV8|RK176_ORYSJ Receptor-like cytoplasmic kinase 176 OS=Oryza sativa subsp. japonica OX=39947 GN=RLCK176 PE=1 SV=1	0.897016	0.000573518	40.056	1	S	WGAKISSESPCRSASSPSGGTSKYASNSSVS	X;X;X;X;X;X;X;X;X;X;X;X;X;X;X;Phospho (STY);X;X;X;X;X;X;X;X;X;X;X;X;X;X;X	XXXXXXXXXXXXPPPPPPPPPPPXXXXXXXX	SAS(0.08)S(0.897)PS(0.012)GGT(0.008)S(0.002)K	4	2	1.9292			14235	14235	2704.8	2637.5	2616.1	3136.7	2913.1	3273.8	2546.8	2294.8	3056.6
sp|Q67U26|VLN3_ORYSJ	789	sp|Q67U26|VLN3_ORYSJ	sp|Q67U26|VLN3_ORYSJ	>sp|Q67U26|VLN3_ORYSJ Villin-3 OS=Oryza sativa subsp. japonica OX=39947 GN=VLN3 PE=2 SV=2	1	1.91e-12	84.887	1	S	RSMSFSPDRVRVRGRSPAFNALAANFENPNA	X;X;X;X;X;X;X;X;X;X;X;X;X;X;X;Phospho (STY);X;X;X;X;X;X;X;X;X;X;X;X;X;X;X	XXXXXXXXXXXXXPPPPPPPPPPPPPPPPPP	GRS(1)PAFNALAANFENPNAR	3	3	-0.46943			7299;7300;7301;7302	7302	22131	21853	21076	21802	22082	21847	21977	24212	23491
sp|Q67U26|VLN3_ORYSJ	808	sp|Q67U26|VLN3_ORYSJ	sp|Q67U26|VLN3_ORYSJ	>sp|Q67U26|VLN3_ORYSJ Villin-3 OS=Oryza sativa subsp. japonica OX=39947 GN=VLN3 PE=2 SV=2	0.830012	0.00201622	45.866	1	S	NALAANFENPNARNLSTPPPAIRKPSPKSPS	X;X;X;X;X;X;X;X;X;X;X;X;X;X;X;Phospho (STY);X;X;X;X;X;X;X;X;X;X;X;X;X;X;X	XXXXXXXXXXXXXPPPPPPPPPPXXXXXXXX	NLS(0.83)T(0.17)PPPAIR	3	2	-0.69333			12273;12274;12275	12275	22289	24654	21802	22392	22154	22580	22336	21955	23839
sp|Q67UI2|MUB2_ORYSJ	87	sp|Q67UI2|MUB2_ORYSJ	sp|Q67UI2|MUB2_ORYSJ	>sp|Q67UI2|MUB2_ORYSJ Membrane-anchored ubiquitin-fold protein 2 OS=Oryza sativa subsp. japonica OX=39947 GN=MUB2 PE=2 SV=1	0.999941	2.44e-11	78.261	1	S	ENNRTLAESRNLAAESPEGPITMHVVVRRSR	X;X;X;X;X;X;X;X;X;X;X;X;X;X;X;Phospho (STY);X;X;X;X;X;X;X;X;X;X;X;X;X;X;X	XXXXXXXXXXPPPPPPPPPPPPPPPPPPXXX	NLAAES(1)PEGPITMHVVVR	6	3	-1.0896			12181;12182	12181	5902.2	5907.6	6132.6	6058.8	6142.6	6205	6973.4	6165.2	7002.7
tr|A0A0P0WYW3|A0A0P0WYW3_ORYSJ;sp|Q67VS5|HAK10_ORYSJ	411;740	tr|A0A0P0WYW3|A0A0P0WYW3_ORYSJ	tr|A0A0P0WYW3|A0A0P0WYW3_ORYSJ	>tr|A0A0P0WYW3|A0A0P0WYW3_ORYSJ Os06g0625900 protein (Fragment) OS=Oryza sativa subsp. japonica OX=39947 GN=Os06g0625900 PE=3 SV=1;>sp|Q67VS5|HAK10_ORYSJ Potassium transporter 10 OS=Oryza sativa subsp. japonica OX=39947 GN=HAK10 PE=2 SV=1	0.751981	6.64e-05	50.668	2	S	GRGSSRGGGGAREIMSPSPSPPPVVVAPRKR	X;X;X;X;X;X;X;X;X;X;X;X;X;X;X;Phospho (STY);X;X;X;Phospho (STY);X;X;X;X;X;X;X;X;X;X;X	XXXXXXXXXXXXPPPPPPPPPPPPPPPPPXX	EIMS(0.752)PS(0.373)PS(0.875)PPPVVVAPR	4	3	-1.4398			4179	4179	655.77	414.97	664.71	506.51	458.02	676.4	617.51	529.4	754.05
tr|A0A0P0WYW3|A0A0P0WYW3_ORYSJ;sp|Q67VS5|HAK10_ORYSJ	415;744	tr|A0A0P0WYW3|A0A0P0WYW3_ORYSJ	tr|A0A0P0WYW3|A0A0P0WYW3_ORYSJ	>tr|A0A0P0WYW3|A0A0P0WYW3_ORYSJ Os06g0625900 protein (Fragment) OS=Oryza sativa subsp. japonica OX=39947 GN=Os06g0625900 PE=3 SV=1;>sp|Q67VS5|HAK10_ORYSJ Potassium transporter 10 OS=Oryza sativa subsp. japonica OX=39947 GN=HAK10 PE=2 SV=1	0.875443	6.64e-05	50.668	2	S	SRGGGGAREIMSPSPSPPPVVVAPRKRVRFV	X;X;X;X;X;X;X;X;X;X;X;Phospho (STY);X;X;X;Phospho (STY);X;X;X;X;X;X;X;X;X;X;X;X;X;X;X	XXXXXXXXPPPPPPPPPPPPPPPPPXXXXXX	EIMS(0.752)PS(0.373)PS(0.875)PPPVVVAPR	8	3	-1.4398			4179	4179	655.77	414.97	664.71	506.51	458.02	676.4	617.51	529.4	754.05
sp|Q67WJ8|NIP22_ORYSJ	287	sp|Q67WJ8|NIP22_ORYSJ	sp|Q67WJ8|NIP22_ORYSJ	>sp|Q67WJ8|NIP22_ORYSJ Aquaporin NIP2-2 OS=Oryza sativa subsp. japonica OX=39947 GN=NIP2-2 PE=1 SV=1	0.945248	6.91e-06	63.949	1	S	AAPQKLSSFKLRRLQSQSMAADEFDNV____	X;X;X;X;X;X;X;X;X;X;X;X;X;X;X;Phospho (STY);X;X;X;X;X;X;X;X;X;X;X;X;X;X;X	XXXXXXXXXXXXPPPPPPPPPPPPPPPXXXX	LQS(0.945)QS(0.055)MAADEFDNV	3	2	-1.703			10810;10811;10812;13574;13575	10812	14519	13825	12327	13045	12813	13244	15532	14785	15222
sp|Q688R3|C3H33_ORYSJ	166	sp|Q688R3|C3H33_ORYSJ	sp|Q688R3|C3H33_ORYSJ	>sp|Q688R3|C3H33_ORYSJ Zinc finger CCCH domain-containing protein 33 OS=Oryza sativa subsp. japonica OX=39947 GN=Os05g0128200 PE=2 SV=1	0.999467	1.7e-06	60.396	3	S	PRATAAEKAIRLLLKSPAVSPSSSPKKSASP	X;X;X;X;X;X;X;X;X;X;X;X;X;X;X;Phospho (STY);X;X;X;Phospho (STY);X;X;Phospho (STY);Phospho (STY);X;X;X;X;X;X;X	XXXXXXXXXXXPPPPPPPPPPPPPPPPXXXX	LLLKS(0.999)PAVS(0.946)PS(0.316)S(0.22)S(0.519)PKK	5	5	-0.31476			10473;10474;10475;10476;10477;10478;10479	10479	24715	23594	23095	17333	16620	16832	29130	27986	28540
sp|Q688R3|C3H33_ORYSJ	170	sp|Q688R3|C3H33_ORYSJ	sp|Q688R3|C3H33_ORYSJ	>sp|Q688R3|C3H33_ORYSJ Zinc finger CCCH domain-containing protein 33 OS=Oryza sativa subsp. japonica OX=39947 GN=Os05g0128200 PE=2 SV=1	0.984414	1.7e-06	60.396	3	S	AAEKAIRLLLKSPAVSPSSSPKKSASPPSPP	X;X;X;X;X;X;X;X;X;X;X;Phospho (STY);X;X;X;Phospho (STY);X;Phospho (STY);Phospho (STY);Phospho (STY);X;X;X;X;X;X;X;X;X;X;X	XXXXXXXPPPPPPPPPPPPPPPPXXXXXXXX	LLLKS(0.997)PAVS(0.984)PS(0.244)S(0.213)S(0.562)PKK	9	5	-0.59533			10470;10471;10472;10473;10474;10475;10476;10477;10478;10479	10476	38604	35713	36209	26577	25081	26199	44956	43948	44894
sp|Q688R3|C3H33_ORYSJ	172	sp|Q688R3|C3H33_ORYSJ	sp|Q688R3|C3H33_ORYSJ	>sp|Q688R3|C3H33_ORYSJ Zinc finger CCCH domain-containing protein 33 OS=Oryza sativa subsp. japonica OX=39947 GN=Os05g0128200 PE=2 SV=1	0.935804	2.11e-06	59.362	3	S	EKAIRLLLKSPAVSPSSSPKKSASPPSPPPP	X;X;X;X;X;X;X;X;X;X;X;X;X;Phospho (STY);X;Phospho (STY);Phospho (STY);Phospho (STY);X;X;X;X;X;X;X;X;X;X;X;X;X	XXXXXPPPPPPPPPPPPPPPXXXXXXXXXXX	LLLKS(0.505)PAVS(0.52)PS(0.936)S(0.274)S(0.765)PK	11	4	-0.78734			10470;10471;10472;10473;10475	10473	23095	20610	21665	14953	14106	15598	26133	26680	27613
sp|Q688R3|C3H33_ORYSJ	173	sp|Q688R3|C3H33_ORYSJ	sp|Q688R3|C3H33_ORYSJ	>sp|Q688R3|C3H33_ORYSJ Zinc finger CCCH domain-containing protein 33 OS=Oryza sativa subsp. japonica OX=39947 GN=Os05g0128200 PE=2 SV=1	0.715641	0.000461224	34.686	3	S	KAIRLLLKSPAVSPSSSPKKSASPPSPPPPQ	X;X;X;X;X;X;X;X;Phospho (STY);X;X;X;Phospho (STY);X;Phospho (STY);Phospho (STY);Phospho (STY);X;X;X;X;X;X;X;X;X;X;X;X;X;X	XXXXPPPPPPPPPPPPPPPPXXXXXXXXXXX	LLLKS(0.618)PAVS(0.507)PS(0.285)S(0.716)S(0.875)PKK	12	4	0.63589			10472;10475;10478	10478	17725	16221	15320	11175	10442	10905	18708	18211	19401
sp|Q688R3|C3H33_ORYSJ	174	sp|Q688R3|C3H33_ORYSJ	sp|Q688R3|C3H33_ORYSJ	>sp|Q688R3|C3H33_ORYSJ Zinc finger CCCH domain-containing protein 33 OS=Oryza sativa subsp. japonica OX=39947 GN=Os05g0128200 PE=2 SV=1	0.914914	1.7e-06	60.396	3	S	AIRLLLKSPAVSPSSSPKKSASPPSPPPPQE	X;X;X;X;X;X;X;Phospho (STY);X;X;X;Phospho (STY);X;Phospho (STY);Phospho (STY);Phospho (STY);X;X;X;X;X;X;X;X;X;X;X;X;X;X;X	XXXPPPPPPPPPPPPPPPPXXXXXXXXXXXX	LLLKS(0.14)PAVS(0.912)PS(0.716)S(0.317)S(0.915)PK	13	3	0.3295			10470;10471;10472;10473;10474;10476;10477;10478;10479	10471	32116	29592	30223	22464	21102	21742	38282	37003	37247
sp|Q688R3|C3H33_ORYSJ	498	sp|Q688R3|C3H33_ORYSJ	sp|Q688R3|C3H33_ORYSJ	>sp|Q688R3|C3H33_ORYSJ Zinc finger CCCH domain-containing protein 33 OS=Oryza sativa subsp. japonica OX=39947 GN=Os05g0128200 PE=2 SV=1	0.99963	0.011747	47.611	1	S	AIMSSRASAFAKRSQSFIDRGGRAPAARSLM	X;X;X;X;X;X;X;X;X;X;X;X;X;X;X;Phospho (STY);X;X;X;X;X;X;X;X;X;X;X;X;X;X;X	XXXXXXXXXXXXPPPPPPPPXXXXXXXXXXX	SQS(1)FIDR	3	2	-0.17931			13840;15607;15608;15609	15607	39054	38596	37680	33474	32378	32348	35197	34135	37096
sp|Q688R3|C3H33_ORYSJ	551	sp|Q688R3|C3H33_ORYSJ	sp|Q688R3|C3H33_ORYSJ	>sp|Q688R3|C3H33_ORYSJ Zinc finger CCCH domain-containing protein 33 OS=Oryza sativa subsp. japonica OX=39947 GN=Os05g0128200 PE=2 SV=1	0.993109	0.0154545	46.437	1	S	WGVQGDELHKLRKSASFAFRGQSAMPVATHA	X;X;X;X;X;X;X;X;X;X;X;X;X;X;X;Phospho (STY);X;X;X;X;X;X;X;X;X;X;X;X;X;X;X	XXXXXXXXXXXXXPPPPPPPXXXXXXXXXXX	S(0.007)AS(0.993)FAFR	3	2	-0.021776			14162;14163;14164	14163	53025	53936	49824	42414	40795	41187	44792	45779	46862
sp|Q688U3|ZHD6_ORYSJ	107	sp|Q688U3|ZHD6_ORYSJ	sp|Q688U3|ZHD6_ORYSJ	>sp|Q688U3|ZHD6_ORYSJ Zinc-finger homeodomain protein 6 OS=Oryza sativa subsp. japonica OX=39947 GN=ZHD6 PE=2 SV=1	1	0.00107417	39.765	1;2	S	KDDGQQQQQLRLLIPSPPTPRVPLLMPPPQP	X;X;X;X;X;X;X;X;X;X;X;X;X;X;X;Phospho (STY);X;X;Phospho (STY);X;X;X;X;X;X;X;X;X;X;X;X	XXXXXXXXXXXPPPPPPPPPPXXXXXXXXXX	LLIPS(1)PPT(1)PR	5	2	0.10142			10459;10460;10461;10462	10462	6456.2	18475	6227.9	9673.3	6342.2	5897.5	5648.5	5717.2	6248
sp|Q69IL4|RF2A_ORYSJ	6	sp|Q69IL4|RF2A_ORYSJ	sp|Q69IL4|RF2A_ORYSJ	>sp|Q69IL4|RF2A_ORYSJ Transcription factor RF2a OS=Oryza sativa subsp. japonica OX=39947 GN=RF2a PE=1 SV=1	0.999957	2.57e-05	36.082	1	S	__________MNREKSPIPGDGGDGLPPQAT	X;X;X;X;X;X;X;X;X;X;X;X;X;X;X;Phospho (STY);X;X;X;X;X;X;X;X;X;X;X;X;X;X;X	XXXXXXXXXXXXXPPPPPPPPPPPPPPPPPP	EKS(1)PIPGDGGDGLPPQATR	3	3	0.26374			4227;4228;4229	4228	11839	12000	10614	13432	13523	14423	11082	11839	10950
sp|Q69KL9|RZ21A_ORYSJ;sp|Q6K9C3|RZP23_ORYSJ	108;107	sp|Q69KL9|RZ21A_ORYSJ	sp|Q69KL9|RZ21A_ORYSJ	>sp|Q69KL9|RZ21A_ORYSJ Serine/arginine-rich splicing factor RSZ21A OS=Oryza sativa subsp. japonica OX=39947 GN=RSZ21A PE=2 SV=1;>sp|Q6K9C3|RZP23_ORYSJ Serine/arginine-rich splicing factor RSZ23 OS=Oryza sativa subsp. japonica OX=39947 GN=RSZ23 PE=2 SV=1	0.555843	0.0043474	27.684	1	S	GETGHFARECRLRIGSGGLGSGRRRSRSRSR	X;X;X;X;X;X;X;X;X;X;X;X;X;X;X;Phospho (STY);X;X;X;X;X;X;X;X;X;X;X;X;X;X;X	XXXXXXXXXXXXXPPPPPPPPPPXXXXXXXX	IGS(0.556)GGLGS(0.444)GR	3	2	0.29345			8288	8288	13458	12634	12118	15635	14684	13952	12158	11971	12706
sp|Q69KL9|RZ21A_ORYSJ;sp|Q6K9C3|RZP23_ORYSJ	113;112	sp|Q69KL9|RZ21A_ORYSJ	sp|Q69KL9|RZ21A_ORYSJ	>sp|Q69KL9|RZ21A_ORYSJ Serine/arginine-rich splicing factor RSZ21A OS=Oryza sativa subsp. japonica OX=39947 GN=RSZ21A PE=2 SV=1;>sp|Q6K9C3|RZP23_ORYSJ Serine/arginine-rich splicing factor RSZ23 OS=Oryza sativa subsp. japonica OX=39947 GN=RSZ23 PE=2 SV=1	0.999641	0.00650599	32.012	1	S	FARECRLRIGSGGLGSGRRRSRSRSRSRSPR	X;X;X;X;X;X;X;X;X;X;X;X;X;X;X;Phospho (STY);X;X;X;X;X;X;X;X;X;X;X;X;X;X;X	XXXXXXXXPPPPPPPPPPXXXXXXXXXXXXX	IGSGGLGS(1)GR	8	2	0.2833			8289;8290;8291;8292	8289	47776	46480	46616	55509	54137	56638	50808	50258	50183
sp|Q69KL9|RZ21A_ORYSJ	151	sp|Q69KL9|RZ21A_ORYSJ	sp|Q69KL9|RZ21A_ORYSJ	>sp|Q69KL9|RZ21A_ORYSJ Serine/arginine-rich splicing factor RSZ21A OS=Oryza sativa subsp. japonica OX=39947 GN=RSZ21A PE=2 SV=1	1	0.00852214	28.658	2	S	GRRSYSPAGRSPRRRSVSPARARSYSRSPQY	X;X;X;X;X;X;X;X;X;X;X;X;X;X;X;Phospho (STY);X;Phospho (STY);X;X;X;X;X;X;X;X;X;X;X;X;X	XXXXXXXXXXXXXPPPPPPPPXXXXXXXXXX	RRS(1)VS(1)PAR	3	3	-0.1815			13774;13775;13776;13777;13778;13779;13780;13781	13781	28193	27176	26527	32776	31241	32786	28945	28465	28481
sp|Q69KL9|RZ21A_ORYSJ	153	sp|Q69KL9|RZ21A_ORYSJ	sp|Q69KL9|RZ21A_ORYSJ	>sp|Q69KL9|RZ21A_ORYSJ Serine/arginine-rich splicing factor RSZ21A OS=Oryza sativa subsp. japonica OX=39947 GN=RSZ21A PE=2 SV=1	1	0.00852214	28.658	2	S	RSYSPAGRSPRRRSVSPARARSYSRSPQYNR	X;X;X;X;X;X;X;X;X;X;X;X;X;Phospho (STY);X;Phospho (STY);X;X;X;X;X;X;X;X;X;X;X;X;X;X;X	XXXXXXXXXXXPPPPPPPPXXXXXXXXXXXX	RRS(1)VS(1)PAR	5	3	-0.1815			13774;13775;13776;13777;13778;13779;13780;13781	13781	28193	27176	26527	32776	31241	32786	28945	28465	28481
sp|Q69LA6|PDX11_ORYSJ	33	sp|Q69LA6|PDX11_ORYSJ	sp|Q69LA6|PDX11_ORYSJ	>sp|Q69LA6|PDX11_ORYSJ Probable pyridoxal 5'-phosphate synthase subunit PDX1.1 OS=Oryza sativa subsp. japonica OX=39947 GN=PDX11 PE=2 SV=1	0.496139	0.00831801	31.97		S	GAALLEPSNHKSATFSVKVGLAQMLRGGVIM	X;X;X;X;X;X;X;X;X;X;X;X;X;X;X;X;X;X;X;X;X;X;X;X;X;X;X;X;X;X;X	XXXXXXXXXXXXXXXXXXXXXXXXXXXXXXX	S(0.008)AT(0.496)FS(0.496)VK	5	2	-0.096494				14255	0	0	0	0	0	0	0	0	0
sp|Q69P51|CESA9_ORYSJ	199	sp|Q69P51|CESA9_ORYSJ	sp|Q69P51|CESA9_ORYSJ	>sp|Q69P51|CESA9_ORYSJ Cellulose synthase A catalytic subunit 9 [UDP-forming] OS=Oryza sativa subsp. japonica OX=39947 GN=CESA9 PE=2 SV=1	0.670314	1.32e-05	48.24	1	S	EFSSSLHKRIHPYPVSEPGSAKWDEKKEVSW	X;X;X;X;X;X;X;X;X;X;X;X;X;X;X;Phospho (STY);X;X;X;X;X;X;X;X;X;X;X;X;X;X;X	XXXXXXXXXPPPPPPPPPPPPPXXXXXXXXX	IHPY(0.003)PVS(0.67)EPGS(0.327)AK	7	3	-0.13915			8310	8310	10492	10271	9751.8	7975.2	8260.3	8404.6	10225	9680.2	10056
sp|Q69QJ7|MGDG1_ORYSJ	200	sp|Q69QJ7|MGDG1_ORYSJ	sp|Q69QJ7|MGDG1_ORYSJ	>sp|Q69QJ7|MGDG1_ORYSJ Probable monogalactosyldiacylglycerol synthase 1, chloroplastic OS=Oryza sativa subsp. japonica OX=39947 GN=MGD1 PE=2 SV=1	0.815272	0.0126611	44.072	1	S	TDHTPWPFNQLPRSYSFLVKHGPLWKMTYYG	X;X;X;X;X;X;X;X;X;X;X;X;X;X;X;Phospho (STY);X;X;X;X;X;X;X;X;X;X;X;X;X;X;X	XXXXXXXXXXXXXPPPPPPPXXXXXXXXXXX	S(0.185)YS(0.815)FLVK	3	2	0.299			16394	16394	7005.6	7292.9	6694.4	8985.9	8859.3	9009	5027.9	5713.2	5257.2
sp|Q69RI8|HAK14_ORYSJ	27	sp|Q69RI8|HAK14_ORYSJ	sp|Q69RI8|HAK14_ORYSJ	>sp|Q69RI8|HAK14_ORYSJ Probable potassium transporter 14 OS=Oryza sativa subsp. japonica OX=39947 GN=HAK14 PE=2 SV=1	0.751159	0.0450759	29.529	1	S	SGGGGGGRMRLRKTESAEMRWVVSGGAYEED	X;X;X;X;X;X;X;X;X;X;X;X;X;X;X;Phospho (STY);X;X;X;X;X;X;X;X;X;X;X;X;X;X;X	XXXXXXXXXXXXPPPPPPPPXXXXXXXXXXX	KT(0.249)ES(0.751)AEMR	4	2	1.0225			9520	9520	1965	1756.6	1974.9	2482.8	2089.6	2410.9	2917.6	2807.5	2839.9
sp|Q69RJ0|GLTB_ORYSJ;tr|A0A0P0X9Q0|A0A0P0X9Q0_ORYSJ;tr|A0A0P0X9S7|A0A0P0X9S7_ORYSJ	642;642;67	sp|Q69RJ0|GLTB_ORYSJ	sp|Q69RJ0|GLTB_ORYSJ	>sp|Q69RJ0|GLTB_ORYSJ Ferredoxin-dependent glutamate synthase, chloroplastic OS=Oryza sativa subsp. japonica OX=39947 GN=GLU PE=2 SV=2;>tr|A0A0P0X9Q0|A0A0P0X9Q0_ORYSJ Os07g0658400 protein (Fragment) OS=Oryza sativa subsp. japonica OX=39947 GN=Os07g0658400	0.436029	4.59e-26	107.79		S	NILEVGPENADQVTLSSPVLNEGELESLLND	X;X;X;X;X;X;X;X;X;X;X;X;X;X;X;Phospho (STY);X;X;X;X;X;X;X;X;X;X;X;X;X;X;X	PPPPPPPPPPPPPPPPPPPPPPPPPPPPPPP	NILEVGPENADQVT(0.128)LS(0.436)S(0.436)PVLNEGELESLLNDSK	16	4	-0.20974				12163	0	0	0	0	0	0	0	0	0
sp|Q69RJ0|GLTB_ORYSJ;tr|A0A0P0X9Q0|A0A0P0X9Q0_ORYSJ;tr|A0A0P0X9S7|A0A0P0X9S7_ORYSJ	643;643;68	sp|Q69RJ0|GLTB_ORYSJ	sp|Q69RJ0|GLTB_ORYSJ	>sp|Q69RJ0|GLTB_ORYSJ Ferredoxin-dependent glutamate synthase, chloroplastic OS=Oryza sativa subsp. japonica OX=39947 GN=GLU PE=2 SV=2;>tr|A0A0P0X9Q0|A0A0P0X9Q0_ORYSJ Os07g0658400 protein (Fragment) OS=Oryza sativa subsp. japonica OX=39947 GN=Os07g0658400	0.436029	4.59e-26	107.79		S	ILEVGPENADQVTLSSPVLNEGELESLLNDS	X;X;X;X;X;X;X;X;X;X;X;X;X;X;X;X;X;X;X;X;X;X;X;X;X;X;X;X;X;X;X	XXXXXXXXXXXXXXXXXXXXXXXXXXXXXXX	NILEVGPENADQVT(0.128)LS(0.436)S(0.436)PVLNEGELESLLNDSK	17	4	-0.20974				12163	0	0	0	0	0	0	0	0	0
sp|Q69SV0|APX8_ORYSJ;tr|A0A0P0VK76|A0A0P0VK76_ORYSJ	434;91	sp|Q69SV0|APX8_ORYSJ	sp|Q69SV0|APX8_ORYSJ	>sp|Q69SV0|APX8_ORYSJ Probable L-ascorbate peroxidase 8, chloroplastic OS=Oryza sativa subsp. japonica OX=39947 GN=APX8 PE=1 SV=2;>tr|A0A0P0VK76|A0A0P0VK76_ORYSJ Os02g0553200 protein (Fragment) OS=Oryza sativa subsp. japonica OX=39947 GN=Os02g0553200 PE=4	0.993711	0.000601202	85.391	1	S	FVAAKYSYGKKELSDSMKQKIRAEYEGFGGS	X;X;X;X;X;X;X;X;X;X;X;X;X;X;X;Phospho (STY);X;X;X;X;X;X;X;X;X;X;X;X;X;X;X	XXXXXXXXXXXPPPPPPPPPXXXXXXXXXXX	ELS(0.006)DS(0.994)MKQK	5	2	1.1541			4479;4480;4481;4482;4483;4484	4484	79733	76957	76906	210560	197560	210520	78700	77582	73110
sp|Q69T31|CINV1_ORYSJ	71	sp|Q69T31|CINV1_ORYSJ	sp|Q69T31|CINV1_ORYSJ	>sp|Q69T31|CINV1_ORYSJ Cytosolic invertase 1 OS=Oryza sativa subsp. japonica OX=39947 GN=CINV1 PE=1 SV=1	1	4.94e-11	103.95	1	S	GGGHGGTRGGFDGMYSPGGGLRSLVGTPASS	X;X;X;X;X;X;X;X;X;X;X;X;X;X;X;Phospho (STY);X;X;X;X;X;X;X;X;X;X;X;X;X;X;X	XXXXXXXXPPPPPPPPPPPPPPXXXXXXXXX	GGFDGMYS(1)PGGGLR	8	2	-0.85764			6369;6370;6371;6372;6373	6373	46630	47751	42646	50889	49912	53538	51153	51674	49887
sp|Q69T31|CINV1_ORYSJ;tr|Q0JD43|Q0JD43_ORYSJ	43;44	sp|Q69T31|CINV1_ORYSJ;tr|Q0JD43|Q0JD43_ORYSJ	tr|Q0JD43|Q0JD43_ORYSJ	>sp|Q69T31|CINV1_ORYSJ Cytosolic invertase 1 OS=Oryza sativa subsp. japonica OX=39947 GN=CINV1 PE=1 SV=1;>tr|Q0JD43|Q0JD43_ORYSJ Alkaline/neutral invertase OS=Oryza sativa subsp. japonica OX=39947 GN=OSJNBa0084A10.16 PE=2 SV=1	1	0.00293663	72.004	1	S	RMLNHRPRINVDRQRSFDDRSLAELSISGTA;SRLLNKPRINVERQRSFDDRSLSDVSYSGGG	X;X;X;X;X;X;X;X;X;X;X;X;X;X;X;Phospho (STY);X;X;X;X;X;X;X;X;X;X;X;X;X;X;X	XXXXXXXXXXXXXPPPPPPPXXXXXXXXXXX	QRS(1)FDDR	3	3	0.11329			13145;13146;13147;13148;13149;13150;13151	13151	46022	44163	44187	47768	44460	46382	49597	48334	49628
sp|Q69T31|CINV1_ORYSJ	13	sp|Q69T31|CINV1_ORYSJ	sp|Q69T31|CINV1_ORYSJ	>sp|Q69T31|CINV1_ORYSJ Cytosolic invertase 1 OS=Oryza sativa subsp. japonica OX=39947 GN=CINV1 PE=1 SV=1	0.462535	0.00203488	37.754		S	___MELAVGAGGMRRSASHTSLSESDDFDLS	X;X;X;X;X;X;X;X;X;X;X;X;X;X;X;Phospho (STY);X;X;X;X;X;X;X;X;X;X;X;X;X;X;X	XXXXXXXXXXXXXXXPPPPPPPPPPPPPPPP	S(0.463)AS(0.401)HT(0.13)S(0.005)LS(0.001)ESDDFDLSR	1	3	0.24145				14200	0	0	0	0	0	0	0	0	0
sp|Q69T31|CINV1_ORYSJ	15	sp|Q69T31|CINV1_ORYSJ	sp|Q69T31|CINV1_ORYSJ	>sp|Q69T31|CINV1_ORYSJ Cytosolic invertase 1 OS=Oryza sativa subsp. japonica OX=39947 GN=CINV1 PE=1 SV=1	0.96047	6.7e-15	105.09	1	S	_MELAVGAGGMRRSASHTSLSESDDFDLSRL	X;X;X;X;X;X;X;X;X;X;X;X;X;X;X;Phospho (STY);X;X;X;X;X;X;X;X;X;X;X;X;X;X;X	XXXXXXXXXXXXXPPPPPPPPPPPPPPPPPX	S(0.002)AS(0.96)HT(0.032)S(0.006)LSESDDFDLSR	3	2	1.9019			14199;14201	14199	11839	12970	10817	12197	11054	12777	12056	12655	13490
sp|Q69UI1|RS132_ORYSJ	31	sp|Q69UI1|RS132_ORYSJ	sp|Q69UI1|RS132_ORYSJ	>sp|Q69UI1|RS132_ORYSJ 40S ribosomal protein S13-2 OS=Oryza sativa subsp. japonica OX=39947 GN=Os08g0117300 PE=1 SV=1	0.999285	3.63e-08	122.72	1	S	LPYKRTPPSWLKTAASDVEEMIMKAAKKGQM	X;X;X;X;X;Phospho (STY);X;X;X;X;X;X;X;X;X;Phospho (STY);X;X;X;X;X;X;Oxidation (M);X;X;X;X;X;X;X;X	XXXXXXXXXXXXPPPPPPPPPPPPXXXXXXX	T(0.001)AAS(0.999)DVEEMIMK	4	2	0.079818			16457;16458;16459;16460;16461;16462;16463;16464;16465	16465	45990	47025	43589	45821	46083	47687	45076	42713	42947
sp|Q69XJ0|SPX1_ORYSJ	275	sp|Q69XJ0|SPX1_ORYSJ	sp|Q69XJ0|SPX1_ORYSJ	>sp|Q69XJ0|SPX1_ORYSJ SPX domain-containing protein 1 OS=Oryza sativa subsp. japonica OX=39947 GN=SPX1 PE=1 SV=1	0.497596	3.82e-07	52.44		S	SSTVSAFSLPPLQGDSSPEEQQELWNKIPVI	X;X;X;X;X;X;X;X;X;X;X;X;X;X;X;Phospho (STY);X;X;X;X;X;X;X;X;X;X;X;X;X;X;X	PPPPPPPPPPPPPPPPPPPPPPPPPPPXXXX	SGSSTVSAFS(0.005)LPPLQGDS(0.498)S(0.498)PEEQQELWNK	18	4	0.032016				14862	0	0	0	0	0	0	0	0	0
sp|Q69XJ0|SPX1_ORYSJ	276	sp|Q69XJ0|SPX1_ORYSJ	sp|Q69XJ0|SPX1_ORYSJ	>sp|Q69XJ0|SPX1_ORYSJ SPX domain-containing protein 1 OS=Oryza sativa subsp. japonica OX=39947 GN=SPX1 PE=1 SV=1	0.497596	3.82e-07	52.44		S	STVSAFSLPPLQGDSSPEEQQELWNKIPVIE	X;X;X;X;X;X;X;X;X;X;X;X;X;X;X;X;X;X;X;X;X;X;X;X;X;X;X;X;X;X;X	XXXXXXXXXXXXXXXXXXXXXXXXXXXXXXX	SGSSTVSAFS(0.005)LPPLQGDS(0.498)S(0.498)PEEQQELWNK	19	4	0.032016				14862	0	0	0	0	0	0	0	0	0
tr|A0A0N7KL83|A0A0N7KL83_ORYSJ;sp|Q6AT41|NNJA4_ORYSJ	133;133	tr|A0A0N7KL83|A0A0N7KL83_ORYSJ	tr|A0A0N7KL83|A0A0N7KL83_ORYSJ	>tr|A0A0N7KL83|A0A0N7KL83_ORYSJ Os05g0558800 protein (Fragment) OS=Oryza sativa subsp. japonica OX=39947 GN=Os05g0558800 PE=4 SV=1;>sp|Q6AT41|NNJA4_ORYSJ Protein NINJA homolog 1 OS=Oryza sativa subsp. japonica OX=39947 GN=NINJA1 PE=1 SV=1	0.963999	5.87e-13	75.711	1	S	KKPNTAAEQPDAFSKSSDGGVKNAPISISTD	X;X;X;X;X;X;X;X;X;X;X;X;X;X;X;Phospho (STY);X;X;X;X;X;X;X;X;X;X;X;X;X;X;X	XPPPPPPPPPPPPPPPPPPPPPXXXXXXXXX	S(0.964)S(0.036)DGGVK	1	2	-2.5095			15669;15670;15671	15669	36007	34972	33160	34309	35177	36754	34888	35384	35315
tr|A0A0N7KL83|A0A0N7KL83_ORYSJ;sp|Q6AT41|NNJA4_ORYSJ	134;134	tr|A0A0N7KL83|A0A0N7KL83_ORYSJ	tr|A0A0N7KL83|A0A0N7KL83_ORYSJ	>tr|A0A0N7KL83|A0A0N7KL83_ORYSJ Os05g0558800 protein (Fragment) OS=Oryza sativa subsp. japonica OX=39947 GN=Os05g0558800 PE=4 SV=1;>sp|Q6AT41|NNJA4_ORYSJ Protein NINJA homolog 1 OS=Oryza sativa subsp. japonica OX=39947 GN=NINJA1 PE=1 SV=1	0.482941	5.87e-13	75.711		S	KPNTAAEQPDAFSKSSDGGVKNAPISISTDD	X;X;X;X;X;X;X;X;X;X;X;X;X;X;X;X;X;X;X;X;X;X;X;X;X;X;X;X;X;X;X	XXXXXXXXXXXXXXXXXXXXXXXXXXXXXXX	KPNTAAEQPDAFS(0.034)KS(0.483)S(0.483)DGGVK	16	4	-0.56023				9327	0	0	0	0	0	0	0	0	0
tr|A0A0N7KL83|A0A0N7KL83_ORYSJ;sp|Q6AT41|NNJA4_ORYSJ	207;207	tr|A0A0N7KL83|A0A0N7KL83_ORYSJ	tr|A0A0N7KL83|A0A0N7KL83_ORYSJ	>tr|A0A0N7KL83|A0A0N7KL83_ORYSJ Os05g0558800 protein (Fragment) OS=Oryza sativa subsp. japonica OX=39947 GN=Os05g0558800 PE=4 SV=1;>sp|Q6AT41|NNJA4_ORYSJ Protein NINJA homolog 1 OS=Oryza sativa subsp. japonica OX=39947 GN=NINJA1 PE=1 SV=1	0.994101	1.08e-12	120.88	1	S	SSDDAAVGFQGKRQPSFSGSESSSGKLPQGN	X;X;X;X;X;X;X;X;X;X;X;X;X;X;X;Phospho (STY);X;X;X;X;X;X;X;X;X;X;X;X;X;X;X	XXXXXXXXXXXXPPPPPPPPPPPPPPXXXXX	RQPS(0.994)FS(0.006)GSESSSGK	4	3	-0.17134			13738;13740;13741	13741	20737	21379	19481	29383	27290	29621	26888	25788	24026
tr|A0A0N7KL83|A0A0N7KL83_ORYSJ;sp|Q6AT41|NNJA4_ORYSJ	209;209	tr|A0A0N7KL83|A0A0N7KL83_ORYSJ	tr|A0A0N7KL83|A0A0N7KL83_ORYSJ	>tr|A0A0N7KL83|A0A0N7KL83_ORYSJ Os05g0558800 protein (Fragment) OS=Oryza sativa subsp. japonica OX=39947 GN=Os05g0558800 PE=4 SV=1;>sp|Q6AT41|NNJA4_ORYSJ Protein NINJA homolog 1 OS=Oryza sativa subsp. japonica OX=39947 GN=NINJA1 PE=1 SV=1	0.699532	0.00170477	42.1	1	S	DDAAVGFQGKRQPSFSGSESSSGKLPQGNPL	X;X;X;X;X;X;X;X;X;X;X;X;X;X;X;Phospho (STY);X;X;X;X;X;X;X;X;X;X;X;X;X;X;X	XXXXXXXXXXPPPPPPPPPPPPPPXXXXXXX	RQPS(0.292)FS(0.7)GS(0.008)ESSSGK	6	3	-0.45884			13739	13739	6282.4	6194.1	6420.9	6696.9	6277.1	6120.6	7357.1	6447.3	6705.6
sp|Q6ATB2|CRSH2_ORYSJ	553	sp|Q6ATB2|CRSH2_ORYSJ	sp|Q6ATB2|CRSH2_ORYSJ	>sp|Q6ATB2|CRSH2_ORYSJ Probable GTP diphosphokinase CRSH2, chloroplastic OS=Oryza sativa subsp. japonica OX=39947 GN=CRSH2 PE=2 SV=1	0.915832	0.00427535	62.314	1	S	KVDDTGLIHVYRKNLSDKLVSG_________	X;X;X;X;X;X;X;X;X;X;X;X;X;X;X;Phospho (STY);X;X;X;X;X;X;X;X;X;X;X;X;X;X;X	XXXXXXXXXXXXPPPPPPPPPPXXXXXXXXX	KNLS(0.916)DKLVS(0.084)G	4	2	1.5799			9261	9261	5087.6	4889	4772.1	5049.8	5371.8	6036.8	11632	11875	12069
sp|Q6ATB2|CRSH2_ORYSJ	558	sp|Q6ATB2|CRSH2_ORYSJ	sp|Q6ATB2|CRSH2_ORYSJ	>sp|Q6ATB2|CRSH2_ORYSJ Probable GTP diphosphokinase CRSH2, chloroplastic OS=Oryza sativa subsp. japonica OX=39947 GN=CRSH2 PE=2 SV=1	0.999647	0.00190709	58.493	1	S	GLIHVYRKNLSDKLVSG______________	X;X;X;X;X;X;X;X;X;X;X;X;X;X;X;Phospho (STY);X;X;X;X;X;X;X;X;X;X;X;X;X;X;X	XXXXXXXPPPPPPPPPPXXXXXXXXXXXXXX	NLSDKLVS(1)G	8	2	0.071335			9257;9258;9259;9260;9262;12240;12241;12242;12243;12244;12245	12243	92464	85325	87957	97104	97583	103130	184950	182360	185800
sp|Q6ATB2|CRSH2_ORYSJ	36	sp|Q6ATB2|CRSH2_ORYSJ	sp|Q6ATB2|CRSH2_ORYSJ	>sp|Q6ATB2|CRSH2_ORYSJ Probable GTP diphosphokinase CRSH2, chloroplastic OS=Oryza sativa subsp. japonica OX=39947 GN=CRSH2 PE=2 SV=1	0.999998	0.00110046	80.603	1	S	DVEHHAPAPRLTPAGSGGRLMAELLGVFNGL	X;X;X;X;X;X;X;X;X;X;X;X;X;X;X;Phospho (STY);X;X;X;X;X;X;X;X;X;X;X;X;X;X;X	XXXXXXXXXXPPPPPPPPPXXXXXXXXXXXX	LTPAGS(1)GGR	6	2	0.30973			11103;11104;11105;11106	11103	21106	18692	19972	19253	19609	20805	38693	38155	38404
sp|Q6AUG0|U2AFB_ORYSJ	280	sp|Q6AUG0|U2AFB_ORYSJ	sp|Q6AUG0|U2AFB_ORYSJ	>sp|Q6AUG0|U2AFB_ORYSJ Splicing factor U2af small subunit B OS=Oryza sativa subsp. japonica OX=39947 GN=U2AF35B PE=2 SV=1	0.99873	0.000129411	58.793	2	S	DGGRRRHGSPPRRARSPVRESSEERRAKIEQ	X;X;X;X;X;X;X;X;Phospho (STY);X;X;X;X;X;X;Phospho (STY);X;X;X;X;Phospho (STY);Phospho (STY);X;X;X;X;X;X;X;X;X	XXXXXXXXXXXXXPPPPPPPPPPPPXXXXXX	ARS(0.999)PVRES(0.501)S(0.501)EER	3	3	-0.22719			1688;1689;1690;1691	1688	14421	14381	13680	17888	20705	18628	13190	14148	13584
sp|Q6AUG0|U2AFB_ORYSJ	285	sp|Q6AUG0|U2AFB_ORYSJ	sp|Q6AUG0|U2AFB_ORYSJ	>sp|Q6AUG0|U2AFB_ORYSJ Splicing factor U2af small subunit B OS=Oryza sativa subsp. japonica OX=39947 GN=U2AF35B PE=2 SV=1	0.538891	0.000129411	58.793	2	S	RHGSPPRRARSPVRESSEERRAKIEQWNRER	X;X;X;Phospho (STY);X;X;X;X;X;X;Phospho (STY);X;X;X;X;Phospho (STY);X;X;X;X;X;X;X;X;X;X;X;X;X;X;X	XXXXXXXXPPPPPPPPPPPPXXXXXXXXXXX	ARS(0.922)PVRES(0.539)S(0.539)EER	8	3	-0.29916			1688;1690;1691	1690	13555	13502	12877	16695	19547	17752	12317	13394	12777
sp|Q6AUG0|U2AFB_ORYSJ	286	sp|Q6AUG0|U2AFB_ORYSJ	sp|Q6AUG0|U2AFB_ORYSJ	>sp|Q6AUG0|U2AFB_ORYSJ Splicing factor U2af small subunit B OS=Oryza sativa subsp. japonica OX=39947 GN=U2AF35B PE=2 SV=1	0.977158	0.000129411	58.793	2	S	HGSPPRRARSPVRESSEERRAKIEQWNRERE	X;X;Phospho (STY);X;X;X;X;X;X;Phospho (STY);X;X;X;X;X;Phospho (STY);X;X;X;X;X;X;X;X;X;X;X;X;X;X;X	XXXXXXXPPPPPPPPPPPPXXXXXXXXXXXX	ARS(0.859)PVRES(0.164)S(0.977)EER	9	2	-0.19373			1688;1689;1690;1691	1689	14421	14381	13680	17888	20705	18628	13190	14148	13584
sp|Q6AUG0|U2AFB_ORYSJ	273	sp|Q6AUG0|U2AFB_ORYSJ	sp|Q6AUG0|U2AFB_ORYSJ	>sp|Q6AUG0|U2AFB_ORYSJ Splicing factor U2af small subunit B OS=Oryza sativa subsp. japonica OX=39947 GN=U2AF35B PE=2 SV=1	1	0.00864548	30.499	1	S	SRYDRYDDGGRRRHGSPPRRARSPVRESSEE	X;X;X;X;X;X;X;X;X;X;X;X;X;X;X;Phospho (STY);X;X;X;X;X;X;Phospho (STY);X;X;X;X;Phospho (STY);Phospho (STY);X;X	XXXXXXXXXXXXPPPPPPPPXXXXXXXXXXX	RHGS(1)PPRR	4	4	-0.28507			13524;13525;13526	13526	15721	17595	12829	18500	16846	15358	13649	15556	13757
sp|Q6AVA8|PPDK1_ORYSJ;sp|Q75KR1|PPDK2_ORYSJ	528;468	sp|Q6AVA8|PPDK1_ORYSJ	sp|Q6AVA8|PPDK1_ORYSJ	>sp|Q6AVA8|PPDK1_ORYSJ Pyruvate, phosphate dikinase 1, chloroplastic OS=Oryza sativa subsp. japonica OX=39947 GN=PPDK1 PE=1 SV=1;>sp|Q75KR1|PPDK2_ORYSJ Pyruvate, phosphate dikinase 2 OS=Oryza sativa subsp. japonica OX=39947 GN=PPDK2 PE=3 SV=1	0.63313	2.26e-07	131.71	1	S	MHAAVGILTARGGMTSHAAVVARGWGKCCVS	X;X;X;X;X;X;X;X;X;X;X;X;X;Oxidation (M);X;Phospho (STY);X;X;X;X;X;X;X;X;X;X;X;X;X;X;X	XXXXXXXXXXXPPPPPPPPPPPPXXXXXXXX	GGMT(0.367)S(0.633)HAAVVAR	5	3	-0.45283			6469;6470;6475;6476;6478;6479;6480;6481;6482	6469	54416	53414	52097	96733	99382	105110	52459	52947	50739
sp|Q6AVT2|GLGL1_ORYSJ	417	sp|Q6AVT2|GLGL1_ORYSJ	sp|Q6AVT2|GLGL1_ORYSJ	>sp|Q6AVT2|GLGL1_ORYSJ Glucose-1-phosphate adenylyltransferase large subunit 1, chloroplastic/amyloplastic OS=Oryza sativa subsp. japonica OX=39947 GN=AGPL1 PE=1 SV=1	1	0.00710885	34.798	1	S	CRIEHSVVGIRSRIGSNVHLKDTVMLGADFY	X;X;X;X;X;X;X;X;X;X;X;X;X;X;X;Phospho (STY);X;X;X;X;X;X;X;X;X;X;X;X;X;X;X	XXXXXXXXXXXXXPPPPPPPPXXXXXXXXXX	IGS(1)NVHLK	3	3	0.56341			8293;8294;8295	8295	23737	21387	21378	20097	20401	21749	22833	23462	22669
sp|Q6AWX8|GRF11_ORYSJ	268	sp|Q6AWX8|GRF11_ORYSJ	sp|Q6AWX8|GRF11_ORYSJ	>sp|Q6AWX8|GRF11_ORYSJ Growth-regulating factor 11 OS=Oryza sativa subsp. japonica OX=39947 GN=GRF11 PE=2 SV=1	0.5	5.85e-05	77.667	1	S	SSSKKLAVAAPAAVEST______________	X;X;X;X;X;X;X;X;X;X;X;X;X;X;X;Phospho (STY);X;X;X;X;X;X;X;X;X;X;X;X;X;X;X	XXXXXPPPPPPPPPPPPXXXXXXXXXXXXXX	LAVAAPAAVES(0.5)T(0.5)	11	2	0.34245			9838;9839;9840	9840	5557.3	5554.9	4611.5	5335.8	5153.5	5741.7	4880.6	5111.3	4764.1
sp|Q6ER21|ZHD9_ORYSJ	189	sp|Q6ER21|ZHD9_ORYSJ	sp|Q6ER21|ZHD9_ORYSJ	>sp|Q6ER21|ZHD9_ORYSJ Zinc-finger homeodomain protein 9 OS=Oryza sativa subsp. japonica OX=39947 GN=ZHD9 PE=3 SV=2	1	5.55e-06	41.223	1	S	LGSSGQAQRLPPQVMSPAAAAAPPPGGGGGG	X;X;X;X;X;X;X;X;X;X;X;X;X;X;X;Phospho (STY);X;X;X;X;X;X;X;X;X;X;X;X;X;X;X	XXXXXXXXXPPPPPPPPPPPPPPPPPPPPPP	LPPQVMS(1)PAAAAAPPPGGGGGGMPR	7	3	-1.0819			10748;10749	10749	3931.9	3692.6	4004.6	3993	3761.1	3976.7	4553.1	4183.7	4474.1
sp|Q6ER21|ZHD9_ORYSJ	96	sp|Q6ER21|ZHD9_ORYSJ	sp|Q6ER21|ZHD9_ORYSJ	>sp|Q6ER21|ZHD9_ORYSJ Zinc-finger homeodomain protein 9 OS=Oryza sativa subsp. japonica OX=39947 GN=ZHD9 PE=3 SV=2	1	8.74e-15	82.334	1	S	ACGCHRNFHRRLPEGSPPPPPPPALLPAPPM	X;X;X;X;X;X;X;X;X;X;X;X;X;X;X;Phospho (STY);X;X;X;X;X;X;X;X;X;X;X;X;X;X;X	XXXXXXXXXXPPPPPPPPPPPPPPPPPPPPP	RLPEGS(1)PPPPPPPALLPAPPMPPHR	6	5	0.18438			13568;13569;13570;13571;13572;13573	13573	10143	10080	8793.7	10733	9582.3	10722	9496.9	10592	10308
sp|Q6ERW7|CAD8C_ORYSJ;sp|Q6ERW9|CAD8B_ORYSJ	96;96	sp|Q6ERW7|CAD8C_ORYSJ	sp|Q6ERW7|CAD8C_ORYSJ	>sp|Q6ERW7|CAD8C_ORYSJ Probable cinnamyl alcohol dehydrogenase 8C OS=Oryza sativa subsp. japonica OX=39947 GN=CAD8C PE=2 SV=2;>sp|Q6ERW9|CAD8B_ORYSJ Probable cinnamyl alcohol dehydrogenase 8B OS=Oryza sativa subsp. japonica OX=39947 GN=CAD8B PE=3 SV=2	0.99481	9.55e-05	64.236	1	S	KAAVGWAARDDSGVLSPYNFSRRAQKDDDVT	X;X;X;X;X;X;X;X;X;X;X;X;X;X;X;Phospho (STY);X;X;X;X;X;X;X;X;X;X;X;X;X;X;X	XXXXXXXXXPPPPPPPPPPPPPXXXXXXXXX	DDS(0.001)GVLS(0.995)PYNFS(0.004)R	7	2	0.69914			2692	2692	3692.5	3559.2	3267.8	3516.6	3202.6	3355.3	3875.6	3978.7	3608.6
sp|Q6ERW7|CAD8C_ORYSJ	434	sp|Q6ERW7|CAD8C_ORYSJ	sp|Q6ERW7|CAD8C_ORYSJ	>sp|Q6ERW7|CAD8C_ORYSJ Probable cinnamyl alcohol dehydrogenase 8C OS=Oryza sativa subsp. japonica OX=39947 GN=CAD8C PE=2 SV=2	0.996409	5.33e-11	76.4	1	S	RYRFVIDVAGSSLAGSGDAKI__________	X;X;X;X;X;X;X;X;X;X;X;X;X;X;X;Phospho (STY);X;X;X;X;X;X;X;X;X;X;X;X;X;X;X	XXXPPPPPPPPPPPPPPPPPXXXXXXXXXXX	FVIDVAGS(0.001)S(0.003)LAGS(0.996)GDAK	13	3	-2.5467			5809;5810	5810	2079.5	2126.1	2213.4	2146	2528.2	2074.4	2540.5	2250.7	2282.5
sp|Q6ESR4|DHN1_ORYSJ	247	sp|Q6ESR4|DHN1_ORYSJ	sp|Q6ESR4|DHN1_ORYSJ	>sp|Q6ESR4|DHN1_ORYSJ Dehydrin DHN1 OS=Oryza sativa subsp. japonica OX=39947 GN=DHN1 PE=2 SV=1	0.501875	2.47e-19	86.86	1	S	TTPAPAHPPPATEEVSSPDGKEKKGILGKIM	X;X;X;X;X;X;X;X;X;X;X;X;X;X;X;Phospho (STY);X;X;X;X;X;X;X;X;X;X;X;X;X;X;X	PPPPPPPPPPPPPPPPPPPPPXXXXXXXXXX	KPEDATAVPPPAAS(0.003)PAAPAT(0.008)T(0.008)PAPAHPPPAT(0.305)EEVS(0.502)S(0.174)PDGK	35	4	0.85931			9305	9305	1593.7	1178.5	1267.4	2142	1465.2	1896.1	1541.3	1688.4	1709.6
sp|Q6ESR4|DHN1_ORYSJ	248	sp|Q6ESR4|DHN1_ORYSJ	sp|Q6ESR4|DHN1_ORYSJ	>sp|Q6ESR4|DHN1_ORYSJ Dehydrin DHN1 OS=Oryza sativa subsp. japonica OX=39947 GN=DHN1 PE=2 SV=1	0.484668	2.47e-19	86.86		S	TPAPAHPPPATEEVSSPDGKEKKGILGKIME	X;X;X;X;X;X;X;X;X;X;X;X;X;X;X;X;X;X;X;X;X;X;X;X;X;X;X;X;X;X;X	XXXXXXXXXXXXXXXXXXXXXXXXXXXXXXX	KPEDATAVPPPAASPAAPAT(0.004)T(0.004)PAPAHPPPAT(0.023)EEVS(0.485)S(0.485)PDGK	36	6	0.20882				9308	0	0	0	0	0	0	0	0	0
sp|Q6EU10|MTA70_ORYSJ	103	sp|Q6EU10|MTA70_ORYSJ	sp|Q6EU10|MTA70_ORYSJ	>sp|Q6EU10|MTA70_ORYSJ Probable N6-adenosine-methyltransferase MT-A70-like OS=Oryza sativa subsp. japonica OX=39947 GN=Os02g0672600 PE=2 SV=1	0.626899	6.78e-10	70.522	1	S	RRALPDPARSTRRKTSPGSSPASVAAAPGGL	X;X;X;X;X;X;X;X;X;X;X;X;X;X;X;Phospho (STY);X;X;X;X;X;X;X;X;X;X;X;X;X;X;X	XXXXXXXXXXXXXPPPPPPPPPPPPPPPPPP	KT(0.167)S(0.627)PGS(0.198)S(0.007)PAS(0.001)VAAAPGGLDAVR	3	3	0.47846			9529	9529	2798.4	3656.3	3437.2	4159.2	3957.4	3870.8	2931.3	3337.1	3713.5
sp|Q6EU10|MTA70_ORYSJ	106	sp|Q6EU10|MTA70_ORYSJ	sp|Q6EU10|MTA70_ORYSJ	>sp|Q6EU10|MTA70_ORYSJ Probable N6-adenosine-methyltransferase MT-A70-like OS=Oryza sativa subsp. japonica OX=39947 GN=Os02g0672600 PE=2 SV=1	0.426957	1.74e-13	77.066		S	LPDPARSTRRKTSPGSSPASVAAAPGGLDAV	X;X;X;X;X;X;X;X;X;X;X;X;X;X;X;Phospho (STY);X;X;X;X;X;X;X;X;X;X;X;X;X;X;X	XXXXXXXXXXPPPPPPPPPPPPPPPPPPPPP	KT(0.223)S(0.223)PGS(0.427)S(0.128)PASVAAAPGGLDAVR	6	3	0.093127				9530	0	0	0	0	0	0	0	0	0
sp|Q6EU10|MTA70_ORYSJ	107	sp|Q6EU10|MTA70_ORYSJ	sp|Q6EU10|MTA70_ORYSJ	>sp|Q6EU10|MTA70_ORYSJ Probable N6-adenosine-methyltransferase MT-A70-like OS=Oryza sativa subsp. japonica OX=39947 GN=Os02g0672600 PE=2 SV=1	0.744827	4.28e-21	93.02	1;2	S	PDPARSTRRKTSPGSSPASVAAAPGGLDAVR	X;X;X;X;X;X;X;X;X;X;Phospho (STY);X;X;X;X;Phospho (STY);X;X;X;X;X;X;X;X;X;X;X;X;X;X;X	XXXXXXXXPPPPPPPPPPPPPPPPPPPPPPP	KT(0.069)S(0.051)PGS(0.132)S(0.745)PAS(0.003)VAAAPGGLDAVR	7	3	0.83062			9528;13551	9528	7964.4	7665	7612.4	8732.7	8094.2	8771.3	7985	8233.1	8251.5
sp|Q6EUP4|14335_ORYSJ	243	sp|Q6EUP4|14335_ORYSJ	sp|Q6EUP4|14335_ORYSJ	>sp|Q6EUP4|14335_ORYSJ 14-3-3-like protein GF14-E OS=Oryza sativa subsp. japonica OX=39947 GN=GF14E PE=2 SV=1	0.999768	6.11e-33	132.24	1	S	MQLLRDNLTLWTSDISEDAAEEIKEAPKGES	X;X;X;X;X;X;X;X;X;X;X;X;X;X;X;Phospho (STY);X;X;X;X;X;X;X;X;X;X;X;X;X;X;Phospho (STY)	XXXXXPPPPPPPPPPPPPPPPPPPPPPPXXX	DNLTLWTSDIS(1)EDAAEEIK	11	3	0.26964			3194;3195;3196;3197;3198;3200;3201;3202;3203;3205	3197	19073	20846	19693	21212	20271	20441	20976	21239	20008
sp|Q6EUP4|14335_ORYSJ	258	sp|Q6EUP4|14335_ORYSJ	sp|Q6EUP4|14335_ORYSJ	>sp|Q6EUP4|14335_ORYSJ 14-3-3-like protein GF14-E OS=Oryza sativa subsp. japonica OX=39947 GN=GF14E PE=2 SV=1	1	0.00454739	39.634	1	S	SEDAAEEIKEAPKGESGDGQ___________	Phospho (STY);X;X;X;X;X;X;X;X;X;X;X;X;X;X;Phospho (STY);X;X;X;X;X;X;X;X;X;X;X;X;X;X;X	XXXXXXXXXPPPPPPPPPPPXXXXXXXXXXX	EAPKGES(1)GDGQ	7	2	3.9216			3716	3716	5097.2	4885.3	4288	4552.5	4470.2	4590.7	4529.4	4746.3	4457.3
sp|Q6EUP4|14335_ORYSJ;sp|Q7XTE8|14332_ORYSJ	217;217	sp|Q6EUP4|14335_ORYSJ;sp|Q7XTE8|14332_ORYSJ	sp|Q6EUP4|14335_ORYSJ	>sp|Q6EUP4|14335_ORYSJ 14-3-3-like protein GF14-E OS=Oryza sativa subsp. japonica OX=39947 GN=GF14E PE=2 SV=1;>sp|Q7XTE8|14332_ORYSJ 14-3-3-like protein GF14-B OS=Oryza sativa subsp. japonica OX=39947 GN=GF14B PE=1 SV=2	0.349802	5.3e-05	43.274		S	AKQAFDEAISELDTLSEESYKDSTLIMQLLR	X;X;X;X;X;X;X;X;X;X;X;X;X;X;X;Phospho (STY);X;X;X;X;X;X;X;X;X;X;X;X;X;X;X	XXPPPPPPPPPPPPPPPPPPPPPPPPPPPPP	QAFDEAIS(0.278)ELDT(0.227)LS(0.35)EES(0.125)Y(0.006)KDS(0.006)T(0.006)LIMQLLR	14	4	0.063167				12802	0	0	0	0	0	0	0	0	0
sp|Q6F3A6|CDPKA_ORYSJ	112	sp|Q6F3A6|CDPKA_ORYSJ	sp|Q6F3A6|CDPKA_ORYSJ	>sp|Q6F3A6|CDPKA_ORYSJ Calcium-dependent protein kinase 10 OS=Oryza sativa subsp. japonica OX=39947 GN=CPK10 PE=2 SV=1	0.554821	0.000517087	43.547	1	S	EAARPRPRVPPVKRVSSAGLLVGSVLKRKTE	X;X;X;X;X;X;X;X;X;X;X;X;X;X;X;Phospho (STY);X;X;X;X;X;X;X;X;X;X;X;X;X;X;X	XXXXXXXXXXXXXXPPPPPPPPPPPPPXXXX	VS(0.555)S(0.445)AGLLVGSVLK	2	3	0.055273			18996;18997;18998	18996	6059	6604.1	5367.2	5104.3	3955.1	4311.5	5436.1	6596.7	5477.3
sp|Q6H7U2|C3H13_ORYSJ	105	sp|Q6H7U2|C3H13_ORYSJ	sp|Q6H7U2|C3H13_ORYSJ	>sp|Q6H7U2|C3H13_ORYSJ Zinc finger CCCH domain-containing protein 13 OS=Oryza sativa subsp. japonica OX=39947 GN=Os02g0161200 PE=2 SV=1	0.972422	0.000270151	61.069	1	S	DRRPSSRERDSSYSRSPSRKSERRHEKKTDD	X;X;X;X;X;X;X;X;X;X;X;X;X;X;X;Phospho (STY);X;X;X;X;X;X;X;X;X;X;X;X;X;X;X	XXXXXXXXXPPPPPPPPPPXXXXXXXXXXXX	DSS(0.001)YS(0.015)RS(0.972)PS(0.011)R	7	2	-0.86301			3400;3401;3402;3403;3404;3405	3405	13337	12013	12579	12604	11029	11961	14500	15281	15430
sp|Q6H7U2|C3H13_ORYSJ	267	sp|Q6H7U2|C3H13_ORYSJ	sp|Q6H7U2|C3H13_ORYSJ	>sp|Q6H7U2|C3H13_ORYSJ Zinc finger CCCH domain-containing protein 13 OS=Oryza sativa subsp. japonica OX=39947 GN=Os02g0161200 PE=2 SV=1	0.999706	3.04e-42	217.13	1	S	ANEEGSSVNEDLNERSPNTAATKKRSIPYST	X;X;X;X;X;X;X;X;X;X;X;X;X;X;X;Phospho (STY);X;X;X;X;X;X;X;X;X;X;X;X;X;X;Phospho (STY)	PPPPPPPPPPPPPPPPPPPPPPPXXXXXXXX	GANEEGSSVNEDLNERS(1)PNTAATK	17	4	-0.33668			5955;5956;15471	5956	23104	22364	21528	25422	25070	27577	24929	25178	26376
sp|Q6H7U2|C3H13_ORYSJ	352	sp|Q6H7U2|C3H13_ORYSJ	sp|Q6H7U2|C3H13_ORYSJ	>sp|Q6H7U2|C3H13_ORYSJ Zinc finger CCCH domain-containing protein 13 OS=Oryza sativa subsp. japonica OX=39947 GN=Os02g0161200 PE=2 SV=1	1	0.00773393	33.102	1	S	KSKLGANIFTEKVKGSPVRHVLPSTGMAAHA	X;X;X;X;X;X;X;X;X;X;X;X;X;X;X;Phospho (STY);X;X;X;X;X;X;X;X;X;X;X;X;X;X;X	XXXXXXXXXXXXPPPPPPPXXXXXXXXXXXX	VKGS(1)PVR	4	3	0.25353			18508;18509;18510;18511;18512;18513	18513	62620	56973	57760	68375	65095	70422	58083	58573	55962
sp|Q6I5C3|PYL5_ORYSJ	205	sp|Q6I5C3|PYL5_ORYSJ	sp|Q6I5C3|PYL5_ORYSJ	>sp|Q6I5C3|PYL5_ORYSJ Abscisic acid receptor PYL5 OS=Oryza sativa subsp. japonica OX=39947 GN=PYL5 PE=1 SV=1	0.460586	0.00570462	25.621		S	SLAEVSERLAVQSPTSPLEQ___________	X;X;X;X;X;X;X;X;X;X;X;X;X;X;X;X;X;X;X;X;X;X;X;X;X;X;X;X;X;X;X	XXXXXXXXXXXXXXXXXXXXXXXXXXXXXXX	LAVQS(0.079)PT(0.461)S(0.461)PLEQ	8	3	0.25396				9844	0	0	0	0	0	0	0	0	0
tr|A0A0N7KKN3|A0A0N7KKN3_ORYSJ;sp|Q6I5Q6|RK185_ORYSJ	382;444	tr|A0A0N7KKN3|A0A0N7KKN3_ORYSJ	tr|A0A0N7KKN3|A0A0N7KKN3_ORYSJ	>tr|A0A0N7KKN3|A0A0N7KKN3_ORYSJ Os05g0372100 protein (Fragment) OS=Oryza sativa subsp. japonica OX=39947 GN=Os05g0372100 PE=3 SV=1;>sp|Q6I5Q6|RK185_ORYSJ Receptor-like cytoplasmic kinase 185 OS=Oryza sativa subsp. japonica OX=39947 GN=RLCK185 PE=1 SV=1	0.996415	1.17e-08	60.792	1	S	RAGLDSMDVTGSQMGSPAHAGRKRESSRSTD	X;X;X;X;X;X;X;X;X;X;X;X;X;X;X;Phospho (STY);X;X;X;X;X;X;X;X;X;X;X;X;X;X;X	XPPPPPPPPPPPPPPPPPPPPPXXXXXXXXX	AGLDSMDVTGS(0.003)QMGS(0.996)PAHAGR	15	3	1.1084			759	759	4695.2	3645.1	3928.6	3963.8	4225	4376.1	3943.3	4303.8	4014.6
sp|Q6K215|PIP22_ORYSJ;tr|A0A0P0VM00|A0A0P0VM00_ORYSJ	286;71	sp|Q6K215|PIP22_ORYSJ	sp|Q6K215|PIP22_ORYSJ	>sp|Q6K215|PIP22_ORYSJ Probable aquaporin PIP2-2 OS=Oryza sativa subsp. japonica OX=39947 GN=PIP2-2 PE=2 SV=1;>tr|A0A0P0VM00|A0A0P0VM00_ORYSJ Os02g0629200 protein OS=Oryza sativa subsp. japonica OX=39947 GN=Os02g0629200 PE=4 SV=1	0.99768	0.0399695	32.189	1	S	QYVLRASAAKLGSYRSNA_____________	X;X;X;X;X;X;X;X;X;X;X;X;X;X;X;Phospho (STY);X;X;X;X;X;X;X;X;X;X;X;X;X;X;X	XXXXXXXXXXPPPPPPPPXXXXXXXXXXXXX	LGS(0.002)YRS(0.998)NA	6	2	-0.31781			10196;10197	10196	25612	25322	23123	33404	31109	31249	22965	24645	22916
sp|Q6K271|FCA_ORYSJ	313	sp|Q6K271|FCA_ORYSJ	sp|Q6K271|FCA_ORYSJ	>sp|Q6K271|FCA_ORYSJ Flowering time control protein FCA OS=Oryza sativa subsp. japonica OX=39947 GN=FCA PE=1 SV=1	1	6.04e-07	95.973	1	S	PGESRGGPAFGGPGFSPRSDAALVIRPTANL	X;X;X;X;X;X;X;X;X;X;X;X;X;X;X;Phospho (STY);X;X;X;X;X;X;X;X;X;X;X;X;X;X;X	XXXXXPPPPPPPPPPPPPXXXXXXXXXXXXX	GGPAFGGPGFS(1)PR	11	2	0.21737			6493;6494;6495;6496;6497;6498;6499;6500	6500	52322	54918	51258	58035	55869	55932	47301	47760	48201
sp|Q6K4N0|RSZ21_ORYSJ	169	sp|Q6K4N0|RSZ21_ORYSJ	sp|Q6K4N0|RSZ21_ORYSJ	>sp|Q6K4N0|RSZ21_ORYSJ Serine/arginine-rich splicing factor RSZ21 OS=Oryza sativa subsp. japonica OX=39947 GN=RSZP21 PE=2 SV=1	1	2.45e-05	95.529	1	S	VRGRSYSRSPRGRGGSPYADGRDGGRYRRSR	X;X;X;X;X;X;X;X;X;X;X;X;X;X;X;Phospho (STY);X;X;X;X;X;X;X;X;X;X;X;X;X;X;X	XXXXXXXXXXXPPPPPPPPPPPXXXXXXXXX	GRGGS(1)PYADGR	5	2	-0.27569			6519;6520;6521;6522;6523;6524;7278;7279;7280;7281;7282;7283;7284;7285;7286	7279	69597	63114	63671	73814	72813	78359	69011	69054	68655
sp|Q6K4N0|RSZ21_ORYSJ	131	sp|Q6K4N0|RSZ21_ORYSJ	sp|Q6K4N0|RSZ21_ORYSJ	>sp|Q6K4N0|RSZ21_ORYSJ Serine/arginine-rich splicing factor RSZ21 OS=Oryza sativa subsp. japonica OX=39947 GN=RSZP21 PE=2 SV=1	0.991757	0.00306917	57.221	1	S	RSRSRSRSRSPQYRKSPTYGRRSYSPRDRSP	X;X;X;X;X;X;X;X;X;X;X;X;X;X;X;Phospho (STY);X;X;X;X;X;X;X;X;X;X;X;X;X;X;X	XXXXXXXXXXXXXXPPPPPPPXXXXXXXXXX	KS(0.992)PT(0.008)YGR	2	3	-0.9175			9492;9493;9494;9495;9496	9493	47385	46161	44489	48648	47411	47827	46119	46801	47306
sp|Q6K4N0|RSZ21_ORYSJ	150	sp|Q6K4N0|RSZ21_ORYSJ	sp|Q6K4N0|RSZ21_ORYSJ	>sp|Q6K4N0|RSZ21_ORYSJ Serine/arginine-rich splicing factor RSZ21 OS=Oryza sativa subsp. japonica OX=39947 GN=RSZP21 PE=2 SV=1	1	0.0128953	35.382	2	S	GRRSYSPRDRSPRRRSVSPVRGRSYSRSPRG	X;X;X;X;X;X;X;X;X;X;X;X;X;X;X;Phospho (STY);X;Phospho (STY);X;X;X;X;X;X;X;X;X;X;X;X;X	XXXXXXXXXXXXXPPPPPPPPXXXXXXXXXX	RRS(1)VS(1)PVR	3	3	-0.0046666			13787;13788;13789	13789	14214	12278	13406	15763	15926	16751	14301	14863	15218
sp|Q6K4N0|RSZ21_ORYSJ	152	sp|Q6K4N0|RSZ21_ORYSJ	sp|Q6K4N0|RSZ21_ORYSJ	>sp|Q6K4N0|RSZ21_ORYSJ Serine/arginine-rich splicing factor RSZ21 OS=Oryza sativa subsp. japonica OX=39947 GN=RSZP21 PE=2 SV=1	1	0.0128953	35.382	2	S	RSYSPRDRSPRRRSVSPVRGRSYSRSPRGRG	X;X;X;X;X;X;X;X;X;X;X;X;X;Phospho (STY);X;Phospho (STY);X;X;X;X;X;X;X;X;X;X;X;X;X;X;X	XXXXXXXXXXXPPPPPPPPXXXXXXXXXXXX	RRS(1)VS(1)PVR	5	3	-0.0046666			13787;13788;13789	13789	14214	12278	13406	15763	15926	16751	14301	14863	15218
sp|Q6K548|VDAC1_ORYSJ;tr|B7EKD7|B7EKD7_ORYSJ	94;35	sp|Q6K548|VDAC1_ORYSJ	sp|Q6K548|VDAC1_ORYSJ	>sp|Q6K548|VDAC1_ORYSJ Mitochondrial outer membrane protein porin 1 OS=Oryza sativa subsp. japonica OX=39947 GN=VDAC1 PE=1 SV=3;>tr|B7EKD7|B7EKD7_ORYSJ Os09g0361400 protein OS=Oryza sativa subsp. japonica OX=39947 GN=Os09g0361400 PE=2 SV=1	0.999941	0.000528364	52.729	1	S	TVTVDELTPGLKSILSFAVPDQRSGKFELQY	X;X;X;X;X;X;X;X;X;X;X;X;X;X;X;Phospho (STY);X;X;X;X;X;X;X;X;X;X;X;X;X;X;X	XXXXXXXXXXXXPPPPPPPPPPPXXXXXXXX	SILS(1)FAVPDQR	4	2	0.39449			14925;14926;14927	14927	5619.1	5761.2	5624.6	5467.9	5703.9	6551.1	5848.3	5596.1	6268.4
sp|Q6K5G8|G3PC3_ORYSJ;sp|Q7FAH2|G3PC2_ORYSJ;tr|A0A0P0WBW9|A0A0P0WBW9_ORYSJ	256;256;152	sp|Q6K5G8|G3PC3_ORYSJ;sp|Q7FAH2|G3PC2_ORYSJ	sp|Q7FAH2|G3PC2_ORYSJ	>sp|Q6K5G8|G3PC3_ORYSJ Glyceraldehyde-3-phosphate dehydrogenase 3, cytosolic OS=Oryza sativa subsp. japonica OX=39947 GN=GAPC3 PE=2 SV=1;>sp|Q7FAH2|G3PC2_ORYSJ Glyceraldehyde-3-phosphate dehydrogenase 2, cytosolic OS=Oryza sativa subsp. japonica OX=39947 G	0.999979	0.00021943	48.285	1	S	DVSVVDLTVRLEKPASYDQIKAAIKEEAEGK;DVSVVDLTVRLEKPASYDQIKAAIKEESEGK	X;X;X;X;X;X;X;X;X;X;X;X;X;X;X;Phospho (STY);X;X;X;X;X;X;X;X;X;X;X;X;X;X;X	XXXXXXXXXXPPPPPPPPPPPXXXXXXXXXX	LEKPAS(1)YDQIK	6	3	0.73616			9999;10000	10000	26017	26857	23352	23964	23257	25242	26747	24986	26079
sp|Q6K678|HDR1_ORYSJ	91	sp|Q6K678|HDR1_ORYSJ	sp|Q6K678|HDR1_ORYSJ	>sp|Q6K678|HDR1_ORYSJ Protein HEADING DATE REPRESSOR 1 OS=Oryza sativa subsp. japonica OX=39947 GN=HDR1 PE=1 SV=1	0.5	5.22e-08	63.36	1	S	RKALFEPLEPINGKRSSAEMLLPPPDFEPAS	X;X;X;X;X;X;X;X;X;X;X;X;X;X;X;Phospho (STY);X;X;X;X;X;X;X;X;X;X;X;X;X;X;X	XXXXXXXXXXXXXXXPPPPPPPPPPPPPPPP	S(0.5)S(0.5)AEMLLPPPDFEPASYPK	1	3	0.049758			15657;15658	15658	1396.8	1629.7	1223.9	1915.8	1735.8	1733.5	1574.1	1664.7	1556.8
sp|Q6K678|HDR1_ORYSJ	92	sp|Q6K678|HDR1_ORYSJ	sp|Q6K678|HDR1_ORYSJ	>sp|Q6K678|HDR1_ORYSJ Protein HEADING DATE REPRESSOR 1 OS=Oryza sativa subsp. japonica OX=39947 GN=HDR1 PE=1 SV=1	0.5	5.22e-08	63.36	1	S	KALFEPLEPINGKRSSAEMLLPPPDFEPASY	X;X;X;X;X;X;X;X;X;X;X;X;X;X;X;X;X;X;X;X;X;X;X;X;X;X;X;X;X;X;X	XXXXXXXXXXXXXXXXXXXXXXXXXXXXXXX	S(0.5)S(0.5)AEMLLPPPDFEPASYPK	2	3	0.049758			15657;15658	15658	1396.8	1629.7	1223.9	1915.8	1735.8	1733.5	1574.1	1664.7	1556.8
tr|A0A0P0VPQ9|A0A0P0VPQ9_ORYSJ;sp|Q6K8D9|SKIPA_ORYSJ	25;239	tr|A0A0P0VPQ9|A0A0P0VPQ9_ORYSJ	tr|A0A0P0VPQ9|A0A0P0VPQ9_ORYSJ	>tr|A0A0P0VPQ9|A0A0P0VPQ9_ORYSJ Os02g0759800 protein OS=Oryza sativa subsp. japonica OX=39947 GN=Os02g0759800 PE=3 SV=1;>sp|Q6K8D9|SKIPA_ORYSJ SNW/SKI-interacting protein A OS=Oryza sativa subsp. japonica OX=39947 GN=SKIPA PE=1 SV=1	0.993241	2.04e-26	176.22	2	S	EPPKFKHKRVPRASGSPPVPVMHSPPRPVTV	X;X;X;X;X;X;X;X;X;X;X;X;X;X;X;Phospho (STY);X;X;X;X;X;Oxidation (M);X;Phospho (STY);X;X;X;X;X;X;X	XXXXXXXXXXXXPPPPPPPPPPPPPPPPPPP	AS(0.007)GS(0.993)PPVPVMHS(1)PPRPVTVK	4	3	0.48238			1762;1763;1764;1765;1766;1767;1768;1769;1770;1771;1772;1773	1773	91976	90453	86963	100680	102160	105940	92121	91264	93510
tr|A0A0P0VPQ9|A0A0P0VPQ9_ORYSJ;sp|Q6K8D9|SKIPA_ORYSJ	33;247	tr|A0A0P0VPQ9|A0A0P0VPQ9_ORYSJ	tr|A0A0P0VPQ9|A0A0P0VPQ9_ORYSJ	>tr|A0A0P0VPQ9|A0A0P0VPQ9_ORYSJ Os02g0759800 protein OS=Oryza sativa subsp. japonica OX=39947 GN=Os02g0759800 PE=3 SV=1;>sp|Q6K8D9|SKIPA_ORYSJ SNW/SKI-interacting protein A OS=Oryza sativa subsp. japonica OX=39947 GN=SKIPA PE=1 SV=1	0.999998	2.04e-26	176.22	2	S	RVPRASGSPPVPVMHSPPRPVTVKDQQDWKI	X;X;X;X;X;X;X;Phospho (STY);X;X;X;X;X;Oxidation (M);X;Phospho (STY);X;X;X;X;X;X;X;X;X;X;X;X;X;X;X	XXXXPPPPPPPPPPPPPPPPPPPPXXXXXXX	AS(0.007)GS(0.993)PPVPVMHS(1)PPRPVTVK	12	3	0.48238			1762;1763;1764;1765;1766;1767;1768;1769;1770;1771;1772;1773	1773	91976	90453	86963	100680	102160	105940	92121	91264	93510
tr|A0A0P0VLU3|A0A0P0VLU3_ORYSJ;sp|Q6K953|GRXC4_ORYSJ	127;132	tr|A0A0P0VLU3|A0A0P0VLU3_ORYSJ	tr|A0A0P0VLU3|A0A0P0VLU3_ORYSJ	>tr|A0A0P0VLU3|A0A0P0VLU3_ORYSJ Os02g0618100 protein (Fragment) OS=Oryza sativa subsp. japonica OX=39947 GN=Os02g0618100 PE=3 SV=1;>sp|Q6K953|GRXC4_ORYSJ Glutaredoxin-C4, chloroplastic OS=Oryza sativa subsp. japonica OX=39947 GN=GRXC4 PE=3 SV=1	0.845485	6.39e-05	51.774	1	S	NLVPLLTEAGAIATPSL______________	X;X;X;X;X;X;X;X;X;X;X;X;X;X;X;Phospho (STY);X;X;X;X;X;X;X;X;X;X;X;X;X;X;X	PPPPPPPPPPPPPPPPPXXXXXXXXXXXXXX	GGNLVPLLTEAGAIAT(0.154)PS(0.845)L	18	2	1.6764			6484	6484	281.54	416.65	310.6	297.7	692.76	448.81	224.11	307.47	353.48
sp|Q6K972|AGO1C_ORYSJ	54	sp|Q6K972|AGO1C_ORYSJ	sp|Q6K972|AGO1C_ORYSJ	>sp|Q6K972|AGO1C_ORYSJ Protein argonaute 1C OS=Oryza sativa subsp. japonica OX=39947 GN=AGO1C PE=2 SV=1	1	6.11e-19	118.04	1	S	QQQQQQGRGCRARGASPPPPPQQQQQQQPRS	X;X;X;X;X;X;X;X;X;X;X;X;X;X;X;Phospho (STY);X;X;X;X;X;X;X;X;X;X;X;X;X;X;X	XXXXXXXXXXXXXPPPPPPPPPPPPPPPPPX	GAS(1)PPPPPQQQQQQQPR	3	3	0.021816			5975;5976;5977;5978;5979	5978	12338	13360	12377	11938	12784	12608	13398	13287	14290
tr|A0A0P0VRU2|A0A0P0VRU2_ORYSJ;sp|Q6K973|SUS6_ORYSJ	8;8	tr|A0A0P0VRU2|A0A0P0VRU2_ORYSJ	tr|A0A0P0VRU2|A0A0P0VRU2_ORYSJ	>tr|A0A0P0VRU2|A0A0P0VRU2_ORYSJ Os02g0831500 protein OS=Oryza sativa subsp. japonica OX=39947 GN=Os02g0831500 PE=4 SV=1;>sp|Q6K973|SUS6_ORYSJ Sucrose synthase 6 OS=Oryza sativa subsp. japonica OX=39947 GN=SUS6 PE=2 SV=1	0.599836	2.55e-05	54.243	1	S	________MAVGLRRSDSIADMMPEALRQSR	X;X;X;X;X;X;X;X;X;X;X;X;X;X;X;Phospho (STY);X;X;X;X;X;X;X;X;X;X;X;X;X;X;X	XXXXXXXXXXXXXXPPPPPPPPPPPPPPXXX	RS(0.6)DS(0.4)IADMMPEALR	2	2	0.64229			13797	13797	3913.7	3142.2	3303.6	3300.1	2725.1	3381.2	3289.1	3619.8	3726.7
tr|A0A0P0VRU2|A0A0P0VRU2_ORYSJ;sp|Q6K973|SUS6_ORYSJ	10;10	tr|A0A0P0VRU2|A0A0P0VRU2_ORYSJ	tr|A0A0P0VRU2|A0A0P0VRU2_ORYSJ	>tr|A0A0P0VRU2|A0A0P0VRU2_ORYSJ Os02g0831500 protein OS=Oryza sativa subsp. japonica OX=39947 GN=Os02g0831500 PE=4 SV=1;>sp|Q6K973|SUS6_ORYSJ Sucrose synthase 6 OS=Oryza sativa subsp. japonica OX=39947 GN=SUS6 PE=2 SV=1	0.992632	2.5e-06	48.706	1	S	______MAVGLRRSDSIADMMPEALRQSRYQ	X;X;X;X;X;X;X;X;X;X;X;X;X;X;X;Phospho (STY);X;X;X;X;X;X;X;X;X;X;X;X;X;X;X	XXXXXXXXXXXXPPPPPPPPPPPPPPXXXXX	RS(0.007)DS(0.993)IADMMPEALR	4	3	-0.24353			13796;13798;14331	13798	13276	14108	13114	11336	11493	12009	13001	13532	13506
tr|A0A0P0VS07|A0A0P0VS07_ORYSJ;sp|Q6K977|C3H19_ORYSJ	154;412	tr|A0A0P0VS07|A0A0P0VS07_ORYSJ	tr|A0A0P0VS07|A0A0P0VS07_ORYSJ	>tr|A0A0P0VS07|A0A0P0VS07_ORYSJ Os02g0831100 protein (Fragment) OS=Oryza sativa subsp. japonica OX=39947 GN=Os02g0831100 PE=4 SV=1;>sp|Q6K977|C3H19_ORYSJ Zinc finger CCCH domain-containing protein 19 OS=Oryza sativa subsp. japonica OX=39947 GN=Os02g0831100	0.999997	3.92e-08	101.36	1	S	LQPEKERDRGPRARLSPPSQTDLRGKLHDRL	X;X;X;X;X;X;X;X;X;X;X;X;X;X;X;Phospho (STY);X;X;X;X;X;X;X;X;X;X;X;X;X;X;X	XXXXXXXXXXXXPPPPPPPPPPPPXXXXXXX	ARLS(1)PPSQTDLR	4	3	-0.070034			1661;1662;1663;1664;1665;1666;1667;1668;1669	1668	33281	33957	31536	38578	36272	39612	33920	33639	33795
tr|A0A0P0VS07|A0A0P0VS07_ORYSJ;sp|Q6K977|C3H19_ORYSJ	45;303	tr|A0A0P0VS07|A0A0P0VS07_ORYSJ	tr|A0A0P0VS07|A0A0P0VS07_ORYSJ	>tr|A0A0P0VS07|A0A0P0VS07_ORYSJ Os02g0831100 protein (Fragment) OS=Oryza sativa subsp. japonica OX=39947 GN=Os02g0831100 PE=4 SV=1;>sp|Q6K977|C3H19_ORYSJ Zinc finger CCCH domain-containing protein 19 OS=Oryza sativa subsp. japonica OX=39947 GN=Os02g0831100	0.999073	0.00432791	39.442	1	S	RQTHDSYGFERSHRGSAEKLLSESRFSQREP	X;X;X;X;X;X;X;X;X;X;X;X;X;X;X;Phospho (STY);X;X;X;X;X;X;X;X;X;X;X;X;X;X;X	XXXXXXXXXXXPPPPPPPPXXXXXXXXXXXX	S(0.001)HRGS(0.999)AEK	5	3	-0.49272			14896	14896	3120.4	2820.6	3039.2	12192	11163	12780	3078	2991.6	2297.4
sp|Q6S4P4|RF2B_ORYSJ	80	sp|Q6S4P4|RF2B_ORYSJ	sp|Q6S4P4|RF2B_ORYSJ	>sp|Q6S4P4|RF2B_ORYSJ Transcription factor RF2b OS=Oryza sativa subsp. japonica OX=39947 GN=RF2b PE=1 SV=2	0.502118	0.00244174	37.711	1	S	PAAAGGSDRDRAAETSSPPRPKHRHSSSVDG	X;X;X;X;X;X;X;X;X;X;X;X;X;X;X;Phospho (STY);X;X;X;X;X;X;X;X;X;X;X;X;X;X;X	XXXXXXXXXXXPPPPPPPPPPPXXXXXXXXX	AAET(0.103)S(0.502)S(0.395)PPRPK	5	3	0.75735			189	189	7009.5	6303.6	6369.9	6783.2	6654.8	7621.2	7203.1	8843	6921.8
sp|Q6S4P4|RF2B_ORYSJ	81	sp|Q6S4P4|RF2B_ORYSJ	sp|Q6S4P4|RF2B_ORYSJ	>sp|Q6S4P4|RF2B_ORYSJ Transcription factor RF2b OS=Oryza sativa subsp. japonica OX=39947 GN=RF2b PE=1 SV=2	0.703743	0.000784759	50.989	1	S	AAAGGSDRDRAAETSSPPRPKHRHSSSVDGS	X;X;X;X;X;X;X;X;X;X;X;X;X;X;X;Phospho (STY);X;X;X;X;X;X;X;X;X;X;X;X;X;X;X	XXXXXXXXXXPPPPPPPPPPPXXXXXXXXXX	AAET(0.148)S(0.148)S(0.704)PPRPK	6	3	0.11333			188	188	9343.5	8552.2	8618.2	9229.8	9603.9	9095.3	8987.8	9537	9174.3
sp|Q6S4P4|RF2B_ORYSJ	22	sp|Q6S4P4|RF2B_ORYSJ	sp|Q6S4P4|RF2B_ORYSJ	>sp|Q6S4P4|RF2B_ORYSJ Transcription factor RF2b OS=Oryza sativa subsp. japonica OX=39947 GN=RF2b PE=1 SV=2	1	0.00227491	45.856	1	S	TDPAAMRGAHHRRARSEVAFRLPDDLDLGGG	X;X;X;X;X;X;X;X;X;X;X;X;X;X;X;Phospho (STY);X;X;X;X;X;X;X;X;X;X;X;X;X;X;X	XXXXXXXXXXXXXPPPPPPPPXXXXXXXXXX	ARS(1)EVAFR	3	2	-1.7916			1677;1678	1678	34477	33246	32291	31099	28164	30349	31174	30020	31047
tr|A0A0P0X8E0|A0A0P0X8E0_ORYSJ;sp|Q6YVY6|NNJA2_ORYSJ	170;237	tr|A0A0P0X8E0|A0A0P0X8E0_ORYSJ	tr|A0A0P0X8E0|A0A0P0X8E0_ORYSJ	>tr|A0A0P0X8E0|A0A0P0X8E0_ORYSJ Os07g0602900 protein (Fragment) OS=Oryza sativa subsp. japonica OX=39947 GN=Os07g0602900 PE=3 SV=1;>sp|Q6YVY6|NNJA2_ORYSJ Ninja-family protein Os07g0602900 OS=Oryza sativa subsp. japonica OX=39947 GN=Os07g0602900 PE=2 SV=1	0.98163	0.0144543	42.486	1	S	QPPLRTLRSLTMRTTSTGDLRKSMMEDMPMV	X;X;X;X;X;X;X;X;X;X;X;X;X;X;X;Phospho (STY);X;X;X;X;X;X;X;X;X;X;X;X;X;X;X	XXXXXXXXXXXXXPPPPPPPPPXXXXXXXXX	T(0.001)T(0.014)S(0.982)T(0.003)GDLRK	3	2	-0.097032			17533;17534;17535;17536	17536	35503	34464	32215	37581	36418	36173	29790	30045	29363
tr|B7ES13|B7ES13_ORYSJ;sp|Q6YXX9|GG2_ORYSJ	38;38	tr|B7ES13|B7ES13_ORYSJ	tr|B7ES13|B7ES13_ORYSJ	>tr|B7ES13|B7ES13_ORYSJ Os02g0137800 protein OS=Oryza sativa subsp. japonica OX=39947 GN=Os02g0137800 PE=2 SV=1;>sp|Q6YXX9|GG2_ORYSJ Guanine nucleotide-binding protein subunit gamma 2 OS=Oryza sativa subsp. japonica OX=39947 GN=RGG2 PE=1 SV=1	1	4.91e-12	146.56	1	S	AEEEEEVERRAARPVSGQQQQQQRRRPTDVG	X;X;X;X;X;X;X;X;X;X;X;X;X;X;X;Phospho (STY);X;X;X;X;X;X;X;X;X;X;X;X;X;X;X	XXXXXXXXXXPPPPPPPPPPPPPPXXXXXXX	AARPVS(1)GQQQQQQR	6	3	-0.79479			269	269	1697.5	1791.6	1674	2458.3	2384.1	2009.6	1727.8	1922.4	2255.3
sp|Q6YXY2|HACL1_ORYSJ	798	sp|Q6YXY2|HACL1_ORYSJ	sp|Q6YXY2|HACL1_ORYSJ	>sp|Q6YXY2|HACL1_ORYSJ Probable histone acetyltransferase HAC-like 1 OS=Oryza sativa subsp. japonica OX=39947 GN=Os02g0137500 PE=3 SV=2	0.611969	0.00868189	49.751	1	S	DSQPSVPKRLKMQPVSPSTAEREVSMPSNAG	X;X;X;X;X;X;X;X;X;X;X;Oxidation (M);X;X;X;Phospho (STY);X;X;X;X;X;X;X;X;X;X;X;X;X;X;X	XXXXXXXXXXXPPPPPPPPPPPXXXXXXXXX	MQPVS(0.612)PS(0.3)T(0.088)AER	5	2	0.48968			11751	11751	3574.9	3405.3	2946.1	4134.3	3548.7	3930.6	3799.2	3567.6	2953.4
sp|Q6YXY2|HACL1_ORYSJ	800	sp|Q6YXY2|HACL1_ORYSJ	sp|Q6YXY2|HACL1_ORYSJ	>sp|Q6YXY2|HACL1_ORYSJ Probable histone acetyltransferase HAC-like 1 OS=Oryza sativa subsp. japonica OX=39947 GN=Os02g0137500 PE=3 SV=2	0.477087	0.0274634	41.023		S	QPSVPKRLKMQPVSPSTAEREVSMPSNAGLI	X;X;X;X;X;X;X;X;X;X;X;X;X;X;X;X;X;X;X;X;X;X;X;X;X;X;X;X;X;X;X	XXXXXXXXXXXXXXXXXXXXXXXXXXXXXXX	MQPVS(0.477)PS(0.477)T(0.046)AER	7	2	0.25442				11752	0	0	0	0	0	0	0	0	0
sp|Q6Z312|BZP23_ORYSJ;sp|Q6ZDF3|TRAB1_ORYSJ;tr|Q67TQ5|Q67TQ5_ORYSJ;sp|Q69TW5|BZP46_ORYSJ	48;56;71;37	sp|Q6Z312|BZP23_ORYSJ;sp|Q6ZDF3|TRAB1_ORYSJ;tr|Q67TQ5|Q67TQ5_ORYSJ	sp|Q6Z312|BZP23_ORYSJ	>sp|Q6Z312|BZP23_ORYSJ bZIP transcription factor 23 OS=Oryza sativa subsp. japonica OX=39947 GN=BZIP23 PE=2 SV=1;>sp|Q6ZDF3|TRAB1_ORYSJ bZIP transcription factor TRAB1 OS=Oryza sativa subsp. japonica OX=39947 GN=TRAB1 PE=1 SV=2;>tr|Q67TQ5|Q67TQ5_ORYSJ Os09	1	5.53e-07	152.64	1	S	DEFQSTLGGVGKDFGSMNMDELLRSIWTAEE;GGGGGGGSGFGKDFGSMNMDELLRSIWTAEE;STLGGMGGGLGKDFGSMNMDELLRSIWTAEE	X;X;X;X;X;X;X;X;X;X;X;X;X;X;X;Phospho (STY);X;X;X;X;X;X;X;X;X;X;X;X;X;X;X	XXXXXXXXXXXXPPPPPPPPPPPPXXXXXXX	DFGS(1)MNMDELLR	4	2	-0.93274			2723;2724;2725;2726;2727	2727	29969	27164	26511	22344	21395	22447	24916	23274	24654
sp|Q6Z312|BZP23_ORYSJ	249	sp|Q6Z312|BZP23_ORYSJ	sp|Q6Z312|BZP23_ORYSJ	>sp|Q6Z312|BZP23_ORYSJ bZIP transcription factor 23 OS=Oryza sativa subsp. japonica OX=39947 GN=BZIP23 PE=2 SV=1	0.855111	6.97e-09	68.204	2	S	VSSNGFGKMEGGDLSSLSPSPVPYVFKGGLR	X;X;X;X;X;X;X;X;X;X;X;X;X;X;X;Phospho (STY);X;Phospho (STY);X;Phospho (STY);X;X;X;X;X;X;X;X;X;X;X	XXXXXXXXPPPPPPPPPPPPPPPPPPPXXXX	MEGGDLS(0.141)S(0.855)LS(0.436)PS(0.558)PVPY(0.011)VFK	8	3	-0.44919			11499;11501;11502;11504;11505	11501	6284	6689.6	6242.4	5417.3	5304.8	5628.3	5344.9	6120.1	5837.6
sp|Q6Z312|BZP23_ORYSJ	251	sp|Q6Z312|BZP23_ORYSJ	sp|Q6Z312|BZP23_ORYSJ	>sp|Q6Z312|BZP23_ORYSJ bZIP transcription factor 23 OS=Oryza sativa subsp. japonica OX=39947 GN=BZIP23 PE=2 SV=1	0.98745	2.69e-08	61.05	1;2	S	SNGFGKMEGGDLSSLSPSPVPYVFKGGLRGR	X;X;X;X;X;X;X;X;X;X;X;X;X;Phospho (STY);X;Phospho (STY);X;Phospho (STY);X;X;X;X;X;X;X;X;X;X;X;X;X	XXXXXXPPPPPPPPPPPPPPPPPPPXXXXXX	MEGGDLS(0.001)S(0.007)LS(0.987)PS(0.991)PVPY(0.013)VFK	10	3	-0.010585			11496;11497;11498;11499;11500;11503;11506	11498	8701.6	8912.3	7551.7	6952.3	7077.4	7232.6	6684.4	6992.5	6884.5
sp|Q6Z312|BZP23_ORYSJ	253	sp|Q6Z312|BZP23_ORYSJ	sp|Q6Z312|BZP23_ORYSJ	>sp|Q6Z312|BZP23_ORYSJ bZIP transcription factor 23 OS=Oryza sativa subsp. japonica OX=39947 GN=BZIP23 PE=2 SV=1	0.991341	6.97e-09	68.204	2	S	GFGKMEGGDLSSLSPSPVPYVFKGGLRGRKA	X;X;X;X;X;X;X;X;X;X;X;Phospho (STY);X;Phospho (STY);X;Phospho (STY);X;X;X;X;X;X;X;X;X;X;X;X;X;X;X	XXXXPPPPPPPPPPPPPPPPPPPXXXXXXXX	MEGGDLS(0.001)S(0.007)LS(0.987)PS(0.991)PVPY(0.013)VFK	12	3	-0.010585			11498;11500;11501;11502;11503;11504;11505;11506	11498	8185.4	8822.9	7713.4	7276.9	6837.2	7193.9	7125.2	7759.1	7036.6
sp|Q6Z312|BZP23_ORYSJ;sp|Q6ZDF3|TRAB1_ORYSJ;tr|Q67TQ5|Q67TQ5_ORYSJ;sp|Q69TW5|BZP46_ORYSJ	98;94;116;84	sp|Q6Z312|BZP23_ORYSJ;sp|Q6ZDF3|TRAB1_ORYSJ;tr|Q67TQ5|Q67TQ5_ORYSJ	sp|Q6Z312|BZP23_ORYSJ	>sp|Q6Z312|BZP23_ORYSJ bZIP transcription factor 23 OS=Oryza sativa subsp. japonica OX=39947 GN=BZIP23 PE=2 SV=1;>sp|Q6ZDF3|TRAB1_ORYSJ bZIP transcription factor TRAB1 OS=Oryza sativa subsp. japonica OX=39947 GN=TRAB1 PE=1 SV=2;>tr|Q67TQ5|Q67TQ5_ORYSJ Os09	0.940084	0.0117009	8.804	1	S	AEHAAVGAPPVQRQGSLTLPRTLSQKTVDEV;GVAVGAPPTSLQRQGSLTLPRTLSAKTVDEV;SAAAAAAEGGLQRQGSLTLPRTLSVKTVDEV	X;X;X;X;X;X;X;X;X;X;X;X;X;X;X;Phospho (STY);X;X;X;X;X;X;X;X;X;X;X;X;X;X;X	XXXXXXXXXXXXXPPPPPPPPXXXXXXXXXX	QGS(0.94)LT(0.06)LPR	3	3	-0.47087			12929	12929	1660.9	1706.9	1928	1907.4	1453	1758.1	1717	1824.6	1791.7
sp|Q6Z312|BZP23_ORYSJ	26	sp|Q6Z312|BZP23_ORYSJ	sp|Q6Z312|BZP23_ORYSJ	>sp|Q6Z312|BZP23_ORYSJ bZIP transcription factor 23 OS=Oryza sativa subsp. japonica OX=39947 GN=BZIP23 PE=2 SV=1	0.996336	1.77e-26	133.73	1	S	QQLPPMTPLPLARQGSVYSLTFDEFQSTLGG	X;X;X;X;X;X;X;X;X;X;X;X;X;X;X;Phospho (STY);X;X;X;X;X;X;X;X;X;X;X;X;X;X;X	XXXXXXXXXXXXXPPPPPPPPPPPPPPPPPP	QGS(0.996)VYS(0.004)LTFDEFQSTLGGVGK	3	3	-0.18024			12931;12932;12933	12932	5214.5	5998.7	4652.4	4307.3	3580.4	3523.1	4309	4278	4255.3
tr|A0A0P0X3B5|A0A0P0X3B5_ORYSJ;sp|Q75HJ0|RH37_ORYSJ;sp|Q6Z4K6|RH52B_ORYSJ	202;570;565	tr|A0A0P0X3B5|A0A0P0X3B5_ORYSJ	tr|A0A0P0X3B5|A0A0P0X3B5_ORYSJ	>tr|A0A0P0X3B5|A0A0P0X3B5_ORYSJ Os07g0202100 protein (Fragment) OS=Oryza sativa subsp. japonica OX=39947 GN=Os07g0202100 PE=4 SV=1;>sp|Q75HJ0|RH37_ORYSJ DEAD-box ATP-dependent RNA helicase 37 OS=Oryza sativa subsp. japonica OX=39947 GN=PL10A PE=2 SV=1;>sp|	0.885634	0.000952238	77.67	1	S	ANQEVPQWLERYAARSSFGGGGGRNRRSGGG	X;X;X;X;X;X;X;X;X;X;X;X;X;X;X;Phospho (STY);X;X;X;X;X;X;X;X;X;X;X;X;X;X;X	XXXXXXXXXXXXXXXPPPPPPPPPXXXXXXX	S(0.886)S(0.114)FGGGGGR	1	2	0.20867			15692;15693;15694	15694	24155	22614	20348	19315	18310	20717	31455	31181	33060
tr|A0A0P0XGE2|A0A0P0XGE2_ORYSJ;sp|Q6Z528|ZHD10_ORYSJ	146;146	tr|A0A0P0XGE2|A0A0P0XGE2_ORYSJ	tr|A0A0P0XGE2|A0A0P0XGE2_ORYSJ	>tr|A0A0P0XGE2|A0A0P0XGE2_ORYSJ Os08g0438400 protein OS=Oryza sativa subsp. japonica OX=39947 GN=Os08g0438400 PE=4 SV=1;>sp|Q6Z528|ZHD10_ORYSJ Zinc-finger homeodomain protein 10 OS=Oryza sativa subsp. japonica OX=39947 GN=ZHD10 PE=3 SV=1	0.989649	0.00136437	42.217	1	S	APQLLLHGSHQRREQSPETDRVRGPGHHHDD	X;X;X;X;X;X;X;X;X;X;X;X;X;X;X;Phospho (STY);X;X;X;X;X;X;X;X;X;X;X;X;X;X;X	XXXXXXXXXXXXPPPPPPPPPPPXXXXXXXX	REQS(0.99)PET(0.01)DRVR	4	3	0.48579			13433;13434	13434	2355.1	2306.6	2139.9	2495.4	2450.9	2957.3	2486.7	2261.7	2331.7
sp|Q6Z5N4|ODPA1_ORYSJ;sp|Q654V6|ODPA2_ORYSJ	293;301	sp|Q6Z5N4|ODPA1_ORYSJ	sp|Q6Z5N4|ODPA1_ORYSJ	>sp|Q6Z5N4|ODPA1_ORYSJ Pyruvate dehydrogenase E1 component subunit alpha-1, mitochondrial OS=Oryza sativa subsp. japonica OX=39947 GN=Os02g0739600 PE=2 SV=1;>sp|Q654V6|ODPA2_ORYSJ Pyruvate dehydrogenase E1 component subunit alpha-2, mitochondrial OS=Oryza	0.992297	2.03e-12	142.04	1	S	GPIVLEMDTYRYHGHSMSDPGSTYRTRDEIS	X;X;X;X;X;X;X;X;X;X;X;X;X;X;X;Phospho (STY);Oxidation (M);X;X;X;X;X;X;X;X;X;X;X;X;X;X	XXXXXXXXXXXPPPPPPPPPPPPPPXXXXXX	YHGHS(0.992)MS(0.008)DPGSTYR	5	3	-0.06791			19840;19841;19844;19845;19846;19847;19849;19850;19851;19852	19845	42209	43982	40172	38321	37504	40432	47262	47104	46201
sp|Q6Z5N4|ODPA1_ORYSJ;sp|Q654V6|ODPA2_ORYSJ	295;303	sp|Q6Z5N4|ODPA1_ORYSJ	sp|Q6Z5N4|ODPA1_ORYSJ	>sp|Q6Z5N4|ODPA1_ORYSJ Pyruvate dehydrogenase E1 component subunit alpha-1, mitochondrial OS=Oryza sativa subsp. japonica OX=39947 GN=Os02g0739600 PE=2 SV=1;>sp|Q654V6|ODPA2_ORYSJ Pyruvate dehydrogenase E1 component subunit alpha-2, mitochondrial OS=Oryza	0.832541	1.14e-11	163.92	1	S	IVLEMDTYRYHGHSMSDPGSTYRTRDEISGV	X;X;X;X;X;X;X;X;X;X;X;X;X;X;Oxidation (M);Phospho (STY);X;X;X;X;X;X;X;X;X;X;X;X;X;X;X	XXXXXXXXXPPPPPPPPPPPPPPXXXXXXXX	YHGHS(0.167)MS(0.833)DPGSTYR	7	2	0.1676			19839;19842;19843;19848	19848	10164	10614	8990	7241.5	7804.2	8034.1	10891	10671	10883
sp|Q6Z746|MP702_ORYSJ	408	sp|Q6Z746|MP702_ORYSJ	sp|Q6Z746|MP702_ORYSJ	>sp|Q6Z746|MP702_ORYSJ Microtubule-associated protein 70-2 OS=Oryza sativa subsp. japonica OX=39947 GN=MAP70.2 PE=2 SV=1	0.909206	0.0447887	7.9846	1	S	MSKISPNGMLARRSPSFNSRSSLSTSSSLVI	X;X;X;X;X;X;X;X;X;X;X;X;X;X;X;Phospho (STY);X;X;X;X;X;X;X;X;X;X;X;X;X;X;X	XXXXXXXXXXXXPPPPPPPPXXXXXXXXXXX	RS(0.087)PS(0.909)FNS(0.004)R	4	2	-0.6922			13831	13831	5272.1	6262.7	5934.7	5987.2	5963.4	5504.7	4949.7	5142.1	5196
sp|Q6Z7K5|MTP3_ORYSJ	97	sp|Q6Z7K5|MTP3_ORYSJ	sp|Q6Z7K5|MTP3_ORYSJ	>sp|Q6Z7K5|MTP3_ORYSJ Metal tolerance protein 3 OS=Oryza sativa subsp. japonica OX=39947 GN=MTP3 PE=2 SV=1	1	6.62e-07	47.045	1	S	IFEEVEALCMPGEFESDAEVLELEDKEQKQS	X;X;X;X;X;X;X;X;X;X;X;X;X;X;X;Phospho (STY);X;X;X;X;X;X;X;X;X;X;X;X;X;X;X	PPPPPPPPPPPPPPPPPPPPPPPPPPPPPXX	IFEEVEALCMPGEFES(1)DAEVLELEDKEQK	16	4	-2.0571			8163	8163	1132.3	1432.1	943.07	1353.8	1188.5	1115.8	1663.7	1272.9	1682.2
sp|Q6Z7K5|MTP3_ORYSJ	22	sp|Q6Z7K5|MTP3_ORYSJ	sp|Q6Z7K5|MTP3_ORYSJ	>sp|Q6Z7K5|MTP3_ORYSJ Metal tolerance protein 3 OS=Oryza sativa subsp. japonica OX=39947 GN=MTP3 PE=2 SV=1	0.999794	1.36e-15	100.16	1	S	RTPLLGGEGGSTRPPSLRRRDSARSLRSTFL	X;X;X;X;X;X;X;X;X;X;X;X;X;X;X;Phospho (STY);X;X;X;X;X;X;X;X;X;X;X;X;X;X;X	XPPPPPPPPPPPPPPPPPXXXXXXXXXXXXX	TPLLGGEGGSTRPPS(1)LR	15	3	0.20662			17248;17249;17250;17251	17248	33096	33560	30320	30351	28821	31330	36406	35595	36672
sp|Q6Z9D2|KN7H_ORYSJ	808	sp|Q6Z9D2|KN7H_ORYSJ	sp|Q6Z9D2|KN7H_ORYSJ	>sp|Q6Z9D2|KN7H_ORYSJ Kinesin-like protein KIN-7H OS=Oryza sativa subsp. japonica OX=39947 GN=KIN7H PE=2 SV=2	0.782718	3.18e-18	88.635	1	S	TTLRTVKDVGIDSSLSASPSRWPIDFEKMRQ	X;X;X;X;X;X;X;X;X;X;X;X;X;X;X;Phospho (STY);X;X;X;X;X;X;X;X;X;X;X;X;X;X;X	XXXXXXXPPPPPPPPPPPPPPPPPPPPPXXX	DVGIDS(0.008)S(0.036)LS(0.783)AS(0.164)PS(0.009)RWPIDFEK	9	3	0.56387			3518	3518	3059	2600.4	2519.5	2083.8	2483.1	2176.4	3493.7	3315.1	3172.9
sp|Q6Z9D2|KN7H_ORYSJ	810	sp|Q6Z9D2|KN7H_ORYSJ	sp|Q6Z9D2|KN7H_ORYSJ	>sp|Q6Z9D2|KN7H_ORYSJ Kinesin-like protein KIN-7H OS=Oryza sativa subsp. japonica OX=39947 GN=KIN7H PE=2 SV=2	0.802506	2.86e-26	120.01	1	S	LRTVKDVGIDSSLSASPSRWPIDFEKMRQEI	X;X;X;X;X;X;X;X;X;X;X;X;X;X;X;Phospho (STY);X;X;X;X;X;X;X;X;X;X;X;X;X;X;X	XXXXXPPPPPPPPPPPPPPPPPPPPPXXXXX	DVGIDSSLS(0.025)AS(0.803)PS(0.173)RWPIDFEK	11	3	1.1554			3516;3517;3519	3517	8136.2	8181.1	7761.9	6423.1	6322.6	6194.9	10244	11120	10132
sp|Q6ZDF3|TRAB1_ORYSJ	259	sp|Q6ZDF3|TRAB1_ORYSJ	sp|Q6ZDF3|TRAB1_ORYSJ	>sp|Q6ZDF3|TRAB1_ORYSJ bZIP transcription factor TRAB1 OS=Oryza sativa subsp. japonica OX=39947 GN=TRAB1 PE=1 SV=2	0.499914	2.34e-12	74.825	1	S	SVGQMDSAGKGDGDLSSPMAPVPYPFEGVIR	X;X;X;X;X;X;X;X;X;X;X;X;X;X;X;Phospho (STY);X;X;X;X;X;X;X;X;X;X;X;X;X;X;X	XXXXXXXXXXPPPPPPPPPPPPPPPPPPPPP	GDGDLS(0.5)S(0.5)PMAPVPYPFEGVIR	6	2	0.17504			6065	6065	1653.3	1490.9	1679.7	1376.9	1537.5	1490.6	1112.4	1393.2	1656.3
sp|Q6ZDF3|TRAB1_ORYSJ	260	sp|Q6ZDF3|TRAB1_ORYSJ	sp|Q6ZDF3|TRAB1_ORYSJ	>sp|Q6ZDF3|TRAB1_ORYSJ bZIP transcription factor TRAB1 OS=Oryza sativa subsp. japonica OX=39947 GN=TRAB1 PE=1 SV=2	0.858325	1.7e-18	92.949	1	S	VGQMDSAGKGDGDLSSPMAPVPYPFEGVIRG	X;X;X;X;X;X;X;X;X;X;X;X;X;X;X;Phospho (STY);X;X;X;X;X;X;X;X;X;X;X;X;X;X;X	XXXXXXXXXPPPPPPPPPPPPPPPPPPPPPX	GDGDLS(0.142)S(0.858)PMAPVPYPFEGVIR	7	3	1.123			6061;6062;6063;6064;6065	6062	5490.8	5584.5	5072	5031.5	4952.4	5185.3	4676.4	5202.9	5042.6
sp|Q6ZDF3|TRAB1_ORYSJ	30	sp|Q6ZDF3|TRAB1_ORYSJ	sp|Q6ZDF3|TRAB1_ORYSJ	>sp|Q6ZDF3|TRAB1_ORYSJ bZIP transcription factor TRAB1 OS=Oryza sativa subsp. japonica OX=39947 GN=TRAB1 PE=1 SV=2	0.960152	5.43e-06	43.264	1	S	AAGAGAGAAPLARQGSIYSLTFDEFQSTLGG	X;X;X;X;X;X;X;X;X;X;X;X;X;X;X;Phospho (STY);X;X;X;X;X;X;X;X;X;X;X;X;X;X;X	XXXXXXXXXXXXXPPPPPPPPPPPPPPPPPP	QGS(0.96)IY(0.015)S(0.015)LT(0.007)FDEFQS(0.002)T(0.001)LGGMGGGLGK	3	3	-0.46611			12928	12928	446.24	645.87	455.85	498.44	442.79	564.36	318.29	584.31	604.25
tr|A0A0P0VIL4|A0A0P0VIL4_ORYSJ;sp|Q6ZG77|DCDA_ORYSJ	278;477	tr|A0A0P0VIL4|A0A0P0VIL4_ORYSJ	tr|A0A0P0VIL4|A0A0P0VIL4_ORYSJ	>tr|A0A0P0VIL4|A0A0P0VIL4_ORYSJ Os02g0440000 protein (Fragment) OS=Oryza sativa subsp. japonica OX=39947 GN=Os02g0440000 PE=3 SV=1;>sp|Q6ZG77|DCDA_ORYSJ Probable diaminopimelate decarboxylase, chloroplastic OS=Oryza sativa subsp. japonica OX=39947 GN=LYSA	0.999897	0.00091483	35.52	1	S	WVEDDGSIAKIRRGESFDDYMKFFDNLSA__	X;X;X;X;X;X;X;X;X;X;X;X;X;X;X;Phospho (STY);X;X;X;X;X;X;X;X;X;X;X;X;X;X;X	XXXXXXXXXXXXPPPPPPPPPPXXXXXXXXX	RGES(1)FDDYMK	4	2	2.9865			13460	13460	4181.7	5348.8	4057.7	4321.3	3533.6	3545.9	3823.4	3832.5	4231.4
sp|Q6ZHZ1|SPSA4_ORYSJ	754	sp|Q6ZHZ1|SPSA4_ORYSJ	sp|Q6ZHZ1|SPSA4_ORYSJ	>sp|Q6ZHZ1|SPSA4_ORYSJ Probable sucrose-phosphate synthase 4 OS=Oryza sativa subsp. japonica OX=39947 GN=SPS4 PE=2 SV=1	1	0.0232254	26.686	1	S	RRNLEDAVQKLSRGVSANRKTESVENMEATT	X;X;X;X;X;X;X;X;X;X;X;X;X;X;X;Phospho (STY);X;X;X;X;X;X;X;X;X;X;X;X;X;X;X	XXXXXXXXXXXXXPPPPPPPXXXXXXXXXXX	GVS(1)ANRK	3	3	-1.0732			7572	7572	12657	11450	11313	7980	8302.6	8072.1	14688	14818	15216
sp|Q6ZHZ1|SPSA4_ORYSJ	170	sp|Q6ZHZ1|SPSA4_ORYSJ	sp|Q6ZHZ1|SPSA4_ORYSJ	>sp|Q6ZHZ1|SPSA4_ORYSJ Probable sucrose-phosphate synthase 4 OS=Oryza sativa subsp. japonica OX=39947 GN=SPS4 PE=2 SV=1	0.821639	1.02e-12	125.33	1	S	STHDESTRGRMPRIGSTDAIEAWASQHKDKK	X;X;X;X;X;X;X;X;X;X;X;X;X;X;X;Phospho (STY);X;X;X;X;X;X;X;X;X;X;X;X;X;X;X	XXXXXXXXXXXXXPPPPPPPPPPPPPPPXXX	IGS(0.822)T(0.178)DAIEAWASQHK	3	3	0.17825			8296;8297	8296	10997	11196	11134	10357	10255	9773.5	11136	11775	11683
sp|Q6ZHZ1|SPSA4_ORYSJ	707	sp|Q6ZHZ1|SPSA4_ORYSJ	sp|Q6ZHZ1|SPSA4_ORYSJ	>sp|Q6ZHZ1|SPSA4_ORYSJ Probable sucrose-phosphate synthase 4 OS=Oryza sativa subsp. japonica OX=39947 GN=SPS4 PE=2 SV=1	0.932911	1.19e-20	106.8	1	S	RWQKSDDATEVSEADSPGDSLRDVHDISLNL	X;X;X;X;X;X;X;X;X;X;X;X;X;X;X;Phospho (STY);X;X;X;X;X;X;X;X;X;X;X;X;X;X;X	XXXXPPPPPPPPPPPPPPPPPPXXXXXXXXX	SDDATEVS(0.005)EADS(0.933)PGDS(0.062)LR	12	2	3.2023			14289	14289	1976.8	1755.5	1774.4	1799.1	1988.5	1853.5	1762.1	1792.6	1849.7
tr|A0A0P0VNW4|A0A0P0VNW4_ORYSJ;sp|Q6ZI17|OML2_ORYSJ	68;68	tr|A0A0P0VNW4|A0A0P0VNW4_ORYSJ	tr|A0A0P0VNW4|A0A0P0VNW4_ORYSJ	>tr|A0A0P0VNW4|A0A0P0VNW4_ORYSJ Os02g0719800 protein OS=Oryza sativa subsp. japonica OX=39947 GN=Os02g0719800 PE=4 SV=1;>sp|Q6ZI17|OML2_ORYSJ Protein MEI2-like 2 OS=Oryza sativa subsp. japonica OX=39947 GN=ML2 PE=2 SV=1	0.999995	7.77e-14	87.621	2	S	TSLPVLPHEKINFLDSARGTPLMDDASAKLK	X;X;X;X;X;X;X;X;X;X;X;X;X;X;X;Phospho (STY);X;X;X;Phospho (STY);X;X;X;X;X;X;X;X;X;X;X	XXXXXXXXXXPPPPPPPPPPPPPPPPPPPXX	INFLDS(1)ARGT(0.998)PLMDDAS(0.002)AK	6	3	-0.88577			8510;8511;8512;8513;8514;8515	8511	11548	10697	10261	12877	12107	13825	8371.9	9087.1	8736
sp|Q6ZKC0|14333_ORYSJ;tr|A0A0P0XG77|A0A0P0XG77_ORYSJ	234;202	sp|Q6ZKC0|14333_ORYSJ	sp|Q6ZKC0|14333_ORYSJ	>sp|Q6ZKC0|14333_ORYSJ 14-3-3-like protein GF14-C OS=Oryza sativa subsp. japonica OX=39947 GN=GF14C PE=1 SV=1;>tr|A0A0P0XG77|A0A0P0XG77_ORYSJ Os08g0430500 protein (Fragment) OS=Oryza sativa subsp. japonica OX=39947 GN=Os08g0430500 PE=3 SV=1	0.486715	1.7e-05	50.585		S	TLIMQLLRDNLTLWTSDLTEDGGDEVKEASK	X;X;X;X;X;X;X;X;X;X;X;X;X;X;X;Phospho (STY);X;X;X;X;X;X;X;X;X;X;X;X;X;X;X	XXXXXXXXPPPPPPPPPPPPPPPPPPPXXXX	DNLTLWT(0.026)S(0.487)DLT(0.487)EDGGDEVK	8	4	-0.3664				3214	0	0	0	0	0	0	0	0	0
sp|Q6ZKL8|P2C66_ORYSJ	20	sp|Q6ZKL8|P2C66_ORYSJ	sp|Q6ZKL8|P2C66_ORYSJ	>sp|Q6ZKL8|P2C66_ORYSJ Probable protein phosphatase 2C 66 OS=Oryza sativa subsp. japonica OX=39947 GN=Os08g0500300 PE=2 SV=1	1	2.14e-07	80.782	1	S	LSSDLPPRAGAGAGASPGWPQRWRRRRQRGV	X;X;X;X;X;X;X;X;X;X;X;X;X;X;X;Phospho (STY);X;X;X;X;X;X;X;X;X;X;X;X;X;X;X	XXXXXXXXPPPPPPPPPPPPPPXXXXXXXXX	AGAGAGAS(1)PGWPQR	8	2	1.4541			687;688;689	689	19949	20597	20102	22586	22003	23511	21151	21382	20069
sp|Q6ZKL8|P2C66_ORYSJ	519	sp|Q6ZKL8|P2C66_ORYSJ	sp|Q6ZKL8|P2C66_ORYSJ	>sp|Q6ZKL8|P2C66_ORYSJ Probable protein phosphatase 2C 66 OS=Oryza sativa subsp. japonica OX=39947 GN=Os08g0500300 PE=2 SV=1	1	0.0044626	34.113	1	S	GVTRVNSLLNLPRILSGEKRSTSWRKRR___	X;X;X;X;X;X;Phospho (STY);X;X;X;X;X;X;X;X;Phospho (STY);X;X;X;X;X;X;X;X;X;X;X;X;X;X;X	XXXXXXXXXXXXXPPPPPPPXXXXXXXXXXX	ILS(1)GEKR	3	3	-0.8502			8472;8473;8474	8474	35858	36677	34901	21426	20934	22292	40204	39760	42672
sp|Q6ZKL8|P2C66_ORYSJ	510	sp|Q6ZKL8|P2C66_ORYSJ	sp|Q6ZKL8|P2C66_ORYSJ	>sp|Q6ZKL8|P2C66_ORYSJ Probable protein phosphatase 2C 66 OS=Oryza sativa subsp. japonica OX=39947 GN=Os08g0500300 PE=2 SV=1	1	0.00121549	24.529	1	S	EEEEWSALEGVTRVNSLLNLPRILSGEKRST	X;X;X;X;X;X;X;X;X;X;X;X;X;X;X;Phospho (STY);X;X;X;X;X;X;X;X;Phospho (STY);X;X;X;X;X;X	XXXXXXXXXXXXXPPPPPPPPPXXXXXXXXX	VNS(1)LLNLPR	3	2	-1.4897			18694;18695;18696	18696	16944	17592	16206	12455	11769	11916	14274	14407	14901
sp|Q71VM4|IMA1A_ORYSJ;sp|Q9SLX0|IMA1B_ORYSJ	189;195	sp|Q71VM4|IMA1A_ORYSJ	sp|Q71VM4|IMA1A_ORYSJ	>sp|Q71VM4|IMA1A_ORYSJ Importin subunit alpha-1a OS=Oryza sativa subsp. japonica OX=39947 GN=Os01g0253300 PE=1 SV=2;>sp|Q9SLX0|IMA1B_ORYSJ Importin subunit alpha-1b OS=Oryza sativa subsp. japonica OX=39947 GN=Os05g0155601 PE=1 SV=2	1	0.00017093	45.735	1	S	VREQAVWALGNVAGDSPKCRDLVLANGALLP	X;X;X;X;X;X;X;X;X;X;X;X;X;X;X;Phospho (STY);X;X;X;X;X;X;X;X;X;X;X;X;X;X;X	XXPPPPPPPPPPPPPPPPXXXXXXXXXXXXX	EQAVWALGNVAGDS(1)PK	14	3	1.6895			4699;4700;4701	4701	6740.5	7318.3	7043.9	7233.7	7371.6	7832.5	7879.9	8348.3	7750
sp|Q75GE8|CDPK8_ORYSJ	38	sp|Q75GE8|CDPK8_ORYSJ	sp|Q75GE8|CDPK8_ORYSJ	>sp|Q75GE8|CDPK8_ORYSJ Calcium-dependent protein kinase 8 OS=Oryza sativa subsp. japonica OX=39947 GN=CPK8 PE=2 SV=1	0.5	5.49e-05	78.142	1	S	QKKANPFTVAYNRAPSSAGAAAGRPGLMVLR	X;X;X;X;X;X;X;X;X;X;X;X;X;X;X;Phospho (STY);X;X;X;X;X;X;X;X;X;X;X;X;X;X;X	XXXXXXXXXXXXXPPPPPPPPPPPXXXXXXX	APS(0.5)S(0.5)AGAAAGR	3	2	1.1045			1532;1534	1534	23024	25238	23498	21490	21107	21389	17858	18161	18008
sp|Q75GE8|CDPK8_ORYSJ	39	sp|Q75GE8|CDPK8_ORYSJ	sp|Q75GE8|CDPK8_ORYSJ	>sp|Q75GE8|CDPK8_ORYSJ Calcium-dependent protein kinase 8 OS=Oryza sativa subsp. japonica OX=39947 GN=CPK8 PE=2 SV=1	0.947899	5.49e-05	78.142	1	S	KKANPFTVAYNRAPSSAGAAAGRPGLMVLRD	X;X;X;X;X;X;X;X;X;X;X;X;X;X;X;Phospho (STY);X;X;X;X;X;X;X;X;X;X;X;X;X;X;X	XXXXXXXXXXXXPPPPPPPPPPPXXXXXXXX	APS(0.052)S(0.948)AGAAAGR	4	2	-0.4465			1530;1531;1532;1533;1534	1533	40516	42821	40262	36982	36038	37501	38389	38438	38407
sp|Q75GE8|CDPK8_ORYSJ	524	sp|Q75GE8|CDPK8_ORYSJ	sp|Q75GE8|CDPK8_ORYSJ	>sp|Q75GE8|CDPK8_ORYSJ Calcium-dependent protein kinase 8 OS=Oryza sativa subsp. japonica OX=39947 GN=CPK8 PE=2 SV=1	0.999789	0.0155881	16.89	1	S	RKASRQYSRQRFSNLSLKLQKDGSISDDTQ_	X;X;X;X;X;X;X;X;X;X;X;X;X;X;X;Phospho (STY);X;X;X;X;X;X;X;X;X;X;X;X;X;X;X	XXXXXXXXXXXPPPPPPPXXXXXXXXXXXXX	FSNLS(1)LK	5	2	0.5654			5744;5745;5746	5744	40996	39281	39905	50680	47879	51966	44764	47027	45200
sp|Q75GE8|CDPK8_ORYSJ;tr|A0A0N7KNP7|A0A0N7KNP7_ORYSJ;sp|Q84SL0|CDPKK_ORYSJ	228;75;239	sp|Q75GE8|CDPK8_ORYSJ;tr|A0A0N7KNP7|A0A0N7KNP7_ORYSJ	sp|Q75GE8|CDPK8_ORYSJ	>sp|Q75GE8|CDPK8_ORYSJ Calcium-dependent protein kinase 8 OS=Oryza sativa subsp. japonica OX=39947 GN=CPK8 PE=2 SV=1;>tr|A0A0N7KNP7|A0A0N7KNP7_ORYSJ Os07g0568600 protein (Fragment) OS=Oryza sativa subsp. japonica OX=39947 GN=Os07g0568600 PE=4 SV=1;>sp|Q84S	0.967464	2.6e-05	49.143	1	S	SVFFRPGERFTEIVGSPYYMAPEVLKRHYGP;SVFFTPGERFTEIVGSPYYMAPEVLKRNYGP	X;X;X;X;X;X;X;X;X;X;X;X;X;X;X;Phospho (STY);X;X;X;X;X;X;X;X;X;X;X;X;X;X;X	XXXXXXXXXPPPPPPPPPPPPPPPPPXXXXX	FT(0.004)EIVGS(0.967)PY(0.023)Y(0.006)MAPEVLK	7	3	1.1897			5767	5767	1043.9	783.89	1153.8	864.13	955.56	1071.1	923.13	817.52	971.96
sp|Q75GE8|CDPK8_ORYSJ	325	sp|Q75GE8|CDPK8_ORYSJ	sp|Q75GE8|CDPK8_ORYSJ	>sp|Q75GE8|CDPK8_ORYSJ Calcium-dependent protein kinase 8 OS=Oryza sativa subsp. japonica OX=39947 GN=CPK8 PE=2 SV=1	1	2.06e-12	103.09	1	S	RLTAEQVLEHPWLHDSKKMPDIPLGDAVRAR	X;X;X;X;X;X;X;X;X;X;X;X;X;X;X;Phospho (STY);X;X;X;X;X;X;X;X;X;X;X;X;X;X;X	XPPPPPPPPPPPPPPPPXXXXXXXXXXXXXX	LTAEQVLEHPWLHDS(1)K	15	4	0.13834			11041;11042;11043;11044	11044	32857	30811	31241	33053	32566	33226	31207	31922	33889
sp|Q75GR5|SPIN1_ORYSJ	16	sp|Q75GR5|SPIN1_ORYSJ	sp|Q75GR5|SPIN1_ORYSJ	>sp|Q75GR5|SPIN1_ORYSJ KH domain-containing protein SPIN1 OS=Oryza sativa subsp. japonica OX=39947 GN=SPIN1 PE=1 SV=1	1	0.0160349	30.705	1	S	MSGLYSPGFSPARNLSPQIRSNPTDVDSQYL	X;X;X;X;X;X;X;X;X;X;X;X;X;X;X;Phospho (STY);X;X;X;X;X;X;X;X;X;X;X;X;X;X;X	XXXXXXXXXXXXXPPPPPPPXXXXXXXXXXX	NLS(1)PQIR	3	2	0.20804			12266	12266	3982.5	3562.6	3583.8	6138.8	5400	5732.5	4882.8	4427.6	4351.3
tr|A0A0P0W3P0|A0A0P0W3P0_ORYSJ;sp|Q75V57|SAPK9_ORYSJ;sp|Q75H77|SAPKA_ORYSJ;sp|Q7Y0B9|SAPK8_ORYSJ	72;176;177;187	tr|A0A0P0W3P0|A0A0P0W3P0_ORYSJ	tr|A0A0P0W3P0|A0A0P0W3P0_ORYSJ	>tr|A0A0P0W3P0|A0A0P0W3P0_ORYSJ Os03g0764800 protein (Fragment) OS=Oryza sativa subsp. japonica OX=39947 GN=Os03g0764800 PE=4 SV=1;>sp|Q75V57|SAPK9_ORYSJ Serine/threonine-protein kinase SAPK9 OS=Oryza sativa subsp. japonica OX=39947 GN=SAPK9 PE=1 SV=1;>sp|	0.429431	5.14e-10	91.78		S	DFGYSKSSVLHSQPKSTVGTPAYIAPEVLLK	X;X;X;X;X;X;X;X;X;X;X;X;X;X;X;Phospho (STY);X;X;X;X;X;X;X;X;X;X;X;X;X;X;X	XXXXXXXXXXXXXXXPPPPPPPPPPPPPPPP	S(0.429)T(0.429)VGT(0.141)PAYIAPEVLLK	1	3	-0.52871				16152	0	0	0	0	0	0	0	0	0
tr|A0A0P0W5D7|A0A0P0W5D7_ORYSJ;tr|A0A0P0W566|A0A0P0W566_ORYSJ;tr|A0A0P0W540|A0A0P0W540_ORYSJ;sp|Q75LH6|SPL6_ORYSJ	388;388;335;388	tr|A0A0P0W5D7|A0A0P0W5D7_ORYSJ	tr|A0A0P0W5D7|A0A0P0W5D7_ORYSJ	>tr|A0A0P0W5D7|A0A0P0W5D7_ORYSJ Os03g0833300 protein (Fragment) OS=Oryza sativa subsp. japonica OX=39947 GN=Os03g0833300 PE=4 SV=1;>tr|A0A0P0W566|A0A0P0W566_ORYSJ Os03g0833300 protein (Fragment) OS=Oryza sativa subsp. japonica OX=39947 GN=Os03g0833300 PE=4	0.796075	7.16e-16	79.016	1	S	DTYGGMEGFEDGYEGSPTPAFKTTDSPNCPS	X;X;X;X;X;X;X;X;X;X;X;X;X;X;X;Phospho (STY);X;X;X;X;X;X;X;X;X;X;X;X;X;X;X	PPPPPPPPPPPPPPPPPPPPPPXXXXXXXXX	FKDFDLNDTYGGMEGFEDGY(0.134)EGS(0.796)PT(0.07)PAFK	23	5	-0.97614			5570;5574	5574	2685.8	2753.5	2635.4	2356.4	2750.5	2436	3184.4	2571.8	2904
tr|A0A0P0W329|A0A0P0W329_ORYSJ;sp|Q75LL6|TADA2_ORYSJ	326;470	tr|A0A0P0W329|A0A0P0W329_ORYSJ	tr|A0A0P0W329|A0A0P0W329_ORYSJ	>tr|A0A0P0W329|A0A0P0W329_ORYSJ Os03g0750800 protein (Fragment) OS=Oryza sativa subsp. japonica OX=39947 GN=Os03g0750800 PE=4 SV=1;>sp|Q75LL6|TADA2_ORYSJ Transcriptional adapter ADA2 OS=Oryza sativa subsp. japonica OX=39947 GN=ADA2 PE=2 SV=2	0.988773	3.89e-06	46.833	1	S	DQKKGGASLDSTGRDSPKTTGHAGTKHWDDW	X;X;X;X;X;X;X;X;X;X;X;X;X;X;X;Phospho (STY);X;X;X;X;X;X;X;X;X;X;X;X;X;X;X	XXXPPPPPPPPPPPPPPPXXXXXXXXXXXXX	KGGASLDS(0.003)T(0.008)GRDS(0.989)PK	13	3	0.61503			9136;9137;9138	9136	26833	25955	25068	26836	28036	28902	25948	27416	26655
sp|Q7F8S5|PR2E2_ORYSJ;sp|Q69TY4|PR2E1_ORYSJ	216;223	sp|Q7F8S5|PR2E2_ORYSJ	sp|Q7F8S5|PR2E2_ORYSJ	>sp|Q7F8S5|PR2E2_ORYSJ Peroxiredoxin-2E-2, chloroplastic OS=Oryza sativa subsp. japonica OX=39947 GN=PRXIIE-2 PE=1 SV=1;>sp|Q69TY4|PR2E1_ORYSJ Peroxiredoxin-2E-1, chloroplastic OS=Oryza sativa subsp. japonica OX=39947 GN=PRXIIE-1 PE=2 SV=1	0.372343	1.79e-08	61.932		S	VVKVLNLEEGGAFTTSSAEEMLKAL______	X;X;X;X;X;X;X;X;X;X;X;X;X;X;X;Phospho (STY);X;X;X;X;X;X;X;X;X;X;X;X;X;X;X	XXXPPPPPPPPPPPPPPPPPPPPXXXXXXXX	VLNLEEGGAFT(0.268)T(0.268)S(0.372)S(0.092)AEEMLK	13	3	-2.8676				18615	0	0	0	0	0	0	0	0	0
tr|C7J1S6|C7J1S6_ORYSJ;sp|Q7X7E9|DNLI4_ORYSJ	121;1188	tr|C7J1S6|C7J1S6_ORYSJ	tr|C7J1S6|C7J1S6_ORYSJ	>tr|C7J1S6|C7J1S6_ORYSJ Os04g0606450 protein (Fragment) OS=Oryza sativa subsp. japonica OX=39947 GN=Os04g0606450 PE=4 SV=1;>sp|Q7X7E9|DNLI4_ORYSJ Putative DNA ligase 4 OS=Oryza sativa subsp. japonica OX=39947 GN=LIG4 PE=2 SV=2	0.499858	6.76e-05	74.751		S	EQEPKGIKSSTTETPSSPKHERNQTVLRRDT	X;X;X;X;X;X;X;X;X;X;X;X;X;X;X;Phospho (STY);X;X;X;X;X;X;X;X;X;X;X;X;X;X;X	XXXXXXXXPPPPPPPPPPPPPPXXXXXXXXX	SSTTETPS(0.5)S(0.5)PK	8	3	0.025604				15984	0	0	0	0	0	0	0	0	0
tr|C7J1S6|C7J1S6_ORYSJ;sp|Q7X7E9|DNLI4_ORYSJ	122;1189	tr|C7J1S6|C7J1S6_ORYSJ	tr|C7J1S6|C7J1S6_ORYSJ	>tr|C7J1S6|C7J1S6_ORYSJ Os04g0606450 protein (Fragment) OS=Oryza sativa subsp. japonica OX=39947 GN=Os04g0606450 PE=4 SV=1;>sp|Q7X7E9|DNLI4_ORYSJ Putative DNA ligase 4 OS=Oryza sativa subsp. japonica OX=39947 GN=LIG4 PE=2 SV=2	0.964335	6.76e-05	84.174	1	S	QEPKGIKSSTTETPSSPKHERNQTVLRRDTA	X;X;X;X;X;X;X;X;X;X;X;X;X;X;X;Phospho (STY);X;X;X;X;X;X;X;X;X;X;X;X;X;X;X	XXXXXXXPPPPPPPPPPPPPPXXXXXXXXXX	SSTTETPS(0.035)S(0.964)PK	9	2	-2.6452			15985;15987;15988;15990	15987	11500	13626	10814	14441	12323	13929	11577	13384	12626
sp|Q7X7H4|KN7F_ORYSJ	762	sp|Q7X7H4|KN7F_ORYSJ	sp|Q7X7H4|KN7F_ORYSJ	>sp|Q7X7H4|KN7F_ORYSJ Kinesin-like protein KIN-7F OS=Oryza sativa subsp. japonica OX=39947 GN=KIN7F PE=1 SV=2	0.701251	0.00127918	33.109	1	S	TIRSVGLDPITDALQSPSRWPLEFEKKQQEI	X;X;X;X;X;X;X;X;X;X;X;X;X;X;X;Phospho (STY);X;X;X;X;X;X;X;X;X;X;X;X;X;X;X	XXXPPPPPPPPPPPPPPPPPPPPPPPXXXXX	SVGLDPIT(0.059)DALQS(0.701)PS(0.239)RWPLEFEK	13	4	0.77133			16214	16214	257.04	356.19	255.1	344.92	492.52	253.28	486.26	525.89	476.95
sp|Q7X8B5|ACA5_ORYSJ	17	sp|Q7X8B5|ACA5_ORYSJ	sp|Q7X8B5|ACA5_ORYSJ	>sp|Q7X8B5|ACA5_ORYSJ Calcium-transporting ATPase 5, plasma membrane-type OS=Oryza sativa subsp. japonica OX=39947 GN=ACA5 PE=1 SV=2	0.509012	1.61e-36	185.32	1	S	ESASSSLATSGRRRSSSGGGGGSWGSIGSAA	X;X;X;X;X;X;X;X;X;X;X;X;X;X;X;Phospho (STY);X;X;X;X;X;X;X;X;X;X;X;X;X;X;X	XXXXXXXXXXXXXXPPPPPPPPPPPPPPPPP	S(0.369)S(0.509)S(0.122)GGGGGSWGSIGSAADPFDIPAK	2	3	0.038584			15881;15882	15881	6126.3	5450.2	5607.5	2372.5	2819.7	2542	6922.3	6664	6868
sp|Q7X8B5|ACA5_ORYSJ	18	sp|Q7X8B5|ACA5_ORYSJ	sp|Q7X8B5|ACA5_ORYSJ	>sp|Q7X8B5|ACA5_ORYSJ Calcium-transporting ATPase 5, plasma membrane-type OS=Oryza sativa subsp. japonica OX=39947 GN=ACA5 PE=1 SV=2	0.634008	2.2e-36	151.76	1	S	SASSSLATSGRRRSSSGGGGGSWGSIGSAAD	X;X;X;X;X;X;X;X;X;X;X;X;X;X;X;Phospho (STY);X;X;X;X;X;X;X;X;X;X;X;X;X;X;X	XXXXXXXXXXXXXPPPPPPPPPPPPPPPPPP	S(0.183)S(0.183)S(0.634)GGGGGSWGSIGSAADPFDIPAK	3	3	-0.51658			15883;15884	15884	4391.9	4365.4	3448.4	2496.1	2495.3	2906.6	4915.8	4717.1	5131.6
sp|Q7X9A8|RSBZ2_ORYSJ	79	sp|Q7X9A8|RSBZ2_ORYSJ	sp|Q7X9A8|RSBZ2_ORYSJ	>sp|Q7X9A8|RSBZ2_ORYSJ bZIP transcription factor RISBZ2 OS=Oryza sativa subsp. japonica OX=39947 GN=RISBZ2 PE=1 SV=1	0.999655	7.65e-13	90.782	1	S	KFLEEAVLDSPVPNPSPRAEAGGIRGAGGVV	X;X;X;X;X;X;X;X;X;X;X;X;X;X;X;Phospho (STY);X;X;X;X;X;X;X;X;X;X;X;X;X;X;X	XPPPPPPPPPPPPPPPPPXXXXXXXXXXXXX	FLEEAVLDSPVPNPS(1)PR	15	3	-0.084627			5607;5608;5609	5608	1698.5	2299.6	1583.9	1958.1	1696.9	1952.9	1501.2	1787.7	1678.9
sp|Q7X9A8|RSBZ2_ORYSJ	406	sp|Q7X9A8|RSBZ2_ORYSJ	sp|Q7X9A8|RSBZ2_ORYSJ	>sp|Q7X9A8|RSBZ2_ORYSJ bZIP transcription factor RISBZ2 OS=Oryza sativa subsp. japonica OX=39947 GN=RISBZ2 PE=1 SV=1	1	0.000682911	89.033	1	S	AAGKIGRTASLQRVASLEHLQKRMCGGPASS	X;X;X;X;X;X;X;X;X;X;X;X;X;X;X;Phospho (STY);X;X;X;X;X;X;X;X;X;X;X;X;X;X;X	XXXXXXXXXXXXXPPPPPPPPPXXXXXXXXX	VAS(1)LEHLQK	3	2	-0.60157			17931;17932;17933;17934;17935;17936	17936	50773	51800	48138	60020	58362	60646	50596	50431	51054
sp|Q7XBW5|PAP3_ORYSJ	283	sp|Q7XBW5|PAP3_ORYSJ	sp|Q7XBW5|PAP3_ORYSJ	>sp|Q7XBW5|PAP3_ORYSJ Probable plastid-lipid-associated protein 3, chloroplastic OS=Oryza sativa subsp. japonica OX=39947 GN=PAP3 PE=3 SV=1	0.368844	2.39e-07	64.899		S	IEVQFKEGSFQPPKISSSVDLPAEVDIFGQK	X;X;X;X;X;X;X;X;X;X;X;X;X;X;X;Phospho (STY);X;X;X;X;X;X;X;X;X;X;X;X;X;X;X	XXXXXXXXXXXXXXPPPPPPPPPPPPPPPPP	IS(0.369)S(0.305)S(0.326)VDLPAEVDIFGQK	2	3	-2.2469				8697	0	0	0	0	0	0	0	0	0
sp|Q7XBW5|PAP3_ORYSJ	284	sp|Q7XBW5|PAP3_ORYSJ	sp|Q7XBW5|PAP3_ORYSJ	>sp|Q7XBW5|PAP3_ORYSJ Probable plastid-lipid-associated protein 3, chloroplastic OS=Oryza sativa subsp. japonica OX=39947 GN=PAP3 PE=3 SV=1	0.687699	1.58e-18	137.59	1	S	EVQFKEGSFQPPKISSSVDLPAEVDIFGQKI	X;X;X;X;X;X;X;X;X;X;X;X;X;X;X;Phospho (STY);X;X;X;X;X;X;X;X;X;X;X;X;X;X;X	XXXXXXXXXXXXXPPPPPPPPPPPPPPPPPX	IS(0.168)S(0.688)S(0.144)VDLPAEVDIFGQK	3	3	-1.7948			8694;8695;8696	8696	6808.6	6906.2	6497.6	7325.5	7308	8154.4	6625.9	6762.9	6792.8
tr|A0A0P0XX87|A0A0P0XX87_ORYSJ;sp|Q7XC51|MYBS2_ORYSJ	51;51	tr|A0A0P0XX87|A0A0P0XX87_ORYSJ	tr|A0A0P0XX87|A0A0P0XX87_ORYSJ	>tr|A0A0P0XX87|A0A0P0XX87_ORYSJ Os10g0562100 protein OS=Oryza sativa subsp. japonica OX=39947 GN=Os10g0562100 PE=4 SV=1;>sp|Q7XC51|MYBS2_ORYSJ Transcription factor MYBS2 OS=Oryza sativa subsp. japonica OX=39947 GN=MYBS2 PE=2 SV=1	0.429807	2.53e-09	66.83		S	EYEEEEVEGGLFIKKSSSMPNLTSIDPLPVP	X;X;X;X;X;X;X;X;X;X;X;X;X;X;X;Phospho (STY);X;X;X;X;X;X;X;X;X;X;X;X;X;X;X	XXXXXXXXXXXXXXPPPPPPPPPPPPPPPPP	KS(0.43)S(0.317)S(0.235)MPNLT(0.016)S(0.002)IDPLPVPADGGK	2	4	1.5821				9503	0	0	0	0	0	0	0	0	0
tr|A0A0P0XX87|A0A0P0XX87_ORYSJ;sp|Q7XC51|MYBS2_ORYSJ	52;52	tr|A0A0P0XX87|A0A0P0XX87_ORYSJ	tr|A0A0P0XX87|A0A0P0XX87_ORYSJ	>tr|A0A0P0XX87|A0A0P0XX87_ORYSJ Os10g0562100 protein OS=Oryza sativa subsp. japonica OX=39947 GN=Os10g0562100 PE=4 SV=1;>sp|Q7XC51|MYBS2_ORYSJ Transcription factor MYBS2 OS=Oryza sativa subsp. japonica OX=39947 GN=MYBS2 PE=2 SV=1	0.354956	2.53e-09	66.83		S	YEEEEVEGGLFIKKSSSMPNLTSIDPLPVPA	X;X;X;X;X;X;X;X;X;X;X;X;X;X;X;X;X;X;X;X;X;X;X;X;X;X;X;X;X;X;X	XXXXXXXXXXXXXXXXXXXXXXXXXXXXXXX	KS(0.355)S(0.355)S(0.288)MPNLT(0.002)S(0.001)IDPLPVPADGGK	3	4	2.6397				9505	0	0	0	0	0	0	0	0	0
tr|A0A0P0XX87|A0A0P0XX87_ORYSJ;sp|Q7XC51|MYBS2_ORYSJ	53;53	tr|A0A0P0XX87|A0A0P0XX87_ORYSJ	tr|A0A0P0XX87|A0A0P0XX87_ORYSJ	>tr|A0A0P0XX87|A0A0P0XX87_ORYSJ Os10g0562100 protein OS=Oryza sativa subsp. japonica OX=39947 GN=Os10g0562100 PE=4 SV=1;>sp|Q7XC51|MYBS2_ORYSJ Transcription factor MYBS2 OS=Oryza sativa subsp. japonica OX=39947 GN=MYBS2 PE=2 SV=1	0.714116	2.12e-18	93.489	1	S	EEEEVEGGLFIKKSSSMPNLTSIDPLPVPAD	X;X;X;X;X;X;X;X;X;X;X;X;X;X;X;Phospho (STY);Oxidation (M);X;X;X;X;X;X;X;X;X;X;X;X;X;X	XXXXXXXXXXXXXPPPPPPPPPPPPPPPPPP	S(0.143)S(0.143)S(0.714)MPNLTSIDPLPVPADGGK	3	4	0.18882			15913;15917;15920;15921	15913	5572.1	5553	5707	5177	5275.7	5182.1	5812.6	6180.5	6204.6
sp|Q7XHR2|CBT_ORYSJ	340	sp|Q7XHR2|CBT_ORYSJ	sp|Q7XHR2|CBT_ORYSJ	>sp|Q7XHR2|CBT_ORYSJ Calmodulin-binding transcription activator CBT OS=Oryza sativa subsp. japonica OX=39947 GN=CBT PE=1 SV=1	1	0.00542265	45.549	1	S	DGNTSIPNEVPARQNSLGLWKYLDDDSPGLG	X;X;X;X;X;X;X;X;X;X;X;X;X;X;X;Phospho (STY);X;X;X;X;X;X;X;X;X;X;X;X;X;X;X	XXXXXXXXXXXXXPPPPPPPPXXXXXXXXXX	QNS(1)LGLWK	3	2	1.6206			13051;13052	13052	16814	17482	15369	14375	13658	14458	20649	21185	20378
sp|Q7XHW4|CML24_ORYSJ	27	sp|Q7XHW4|CML24_ORYSJ	sp|Q7XHW4|CML24_ORYSJ	>sp|Q7XHW4|CML24_ORYSJ Probable calcium-binding protein CML24 OS=Oryza sativa subsp. japonica OX=39947 GN=CML24 PE=2 SV=1	0.999363	0.00610487	25.328	1	S	SVAAVRPSLGKAPSPSFRLRNGSLNAVRLRR	X;X;X;X;X;X;X;X;X;X;X;X;X;X;X;Phospho (STY);X;X;X;X;X;X;X;X;X;X;X;X;X;X;X	XXXXXXXXXXXPPPPPPPXXXXXXXXXXXXX	APS(0.001)PS(0.999)FR	5	2	0.72076			1527;1528;1529	1527	27158	28251	29414	32409	32323	32935	30268	31403	30570
sp|Q7XII4|REM41_ORYSJ	173	sp|Q7XII4|REM41_ORYSJ	sp|Q7XII4|REM41_ORYSJ	>sp|Q7XII4|REM41_ORYSJ Remorin 4.1 OS=Oryza sativa subsp. japonica OX=39947 GN=REM4.1 PE=1 SV=1	0.999755	2.41e-36	136.46	1	S	ETNPLAIVPDSNPIPSPRRAHLALPAPGDVS	X;X;X;X;X;X;X;X;X;X;X;X;X;X;X;Phospho (STY);X;X;X;X;X;X;X;X;X;X;X;X;X;X;X	PPPPPPPPPPPPPPPPPPXXXXXXXXXXXXX	IGEDELEETNPLAIVPDSNPIPS(1)PR	23	2	-3.6109			8246;8247;8248;8249;8250;8251;8252;8253;8254;8255;8256;8257;8258;8259;8260	8260	6874.2	8010.6	6571	10633	10698	13171	8592	8954.5	9027.6
sp|Q7XIM0|CDPKH_ORYSJ;tr|A0A0P0X2Y3|A0A0P0X2Y3_ORYSJ	558;12	sp|Q7XIM0|CDPKH_ORYSJ	sp|Q7XIM0|CDPKH_ORYSJ	>sp|Q7XIM0|CDPKH_ORYSJ Calcium-dependent protein kinase 17 OS=Oryza sativa subsp. japonica OX=39947 GN=CPK17 PE=2 SV=1;>tr|A0A0P0X2Y3|A0A0P0X2Y3_ORYSJ Os07g0161600 protein (Fragment) OS=Oryza sativa subsp. japonica OX=39947 GN=Os07g0161600 PE=4 SV=1	1	0.000302796	46.575	1	S	QKGNNPLGKKGQGQLSFGLREALKLG_____	X;X;X;X;X;X;X;X;X;X;X;X;X;X;X;Phospho (STY);X;X;X;X;X;X;X;X;X;X;X;X;X;X;X	XXXXXXXXXPPPPPPPPPPPXXXXXXXXXXX	KGQGQLS(1)FGLR	7	3	0.33762			7216;7217;7218;9156;9157;9158	9158	46040	47331	43402	42817	43600	43844	54987	54448	55489
sp|Q7XIM0|CDPKH_ORYSJ	65	sp|Q7XIM0|CDPKH_ORYSJ	sp|Q7XIM0|CDPKH_ORYSJ	>sp|Q7XIM0|CDPKH_ORYSJ Calcium-dependent protein kinase 17 OS=Oryza sativa subsp. japonica OX=39947 GN=CPK17 PE=2 SV=1	0.981578	1.58e-06	59.146	1	S	SVTSSTAPERVTIADSDLSSSTPNKGGNKPK	X;X;X;X;X;X;X;X;X;X;X;X;X;X;X;Phospho (STY);X;X;X;X;X;X;X;X;X;X;X;X;X;X;X	XXXXXXXXXXPPPPPPPPPPPPPPPXXXXXX	VT(0.002)IADS(0.982)DLS(0.012)S(0.003)S(0.001)TPNK	6	3	0.49517			19076	19076	7266.2	7071.7	6779.9	7232.6	7741.8	7736.5	8861.5	8229.7	8981.9
tr|A0A0N7KJ83|A0A0N7KJ83_ORYSJ;sp|Q7XK44|PIRL3_ORYSJ	242;417	tr|A0A0N7KJ83|A0A0N7KJ83_ORYSJ	tr|A0A0N7KJ83|A0A0N7KJ83_ORYSJ	>tr|A0A0N7KJ83|A0A0N7KJ83_ORYSJ Os04g0476700 protein (Fragment) OS=Oryza sativa subsp. japonica OX=39947 GN=Os04g0476700 PE=4 SV=1;>sp|Q7XK44|PIRL3_ORYSJ Plant intracellular Ras-group-related LRR protein 3 OS=Oryza sativa subsp. japonica OX=39947 GN=IRL3 P	0.791866	1.1e-06	57.434	1	S	PQAPTTPSAWLARSVSWVSDVSGSLVGYLSG	X;X;X;X;X;X;X;X;X;X;X;X;X;X;X;Phospho (STY);X;X;X;X;X;X;X;X;X;X;X;X;X;X;X	XXXXXXXXXXXXXPPPPPPPPPPPPPPPPPP	S(0.194)VS(0.792)WVS(0.014)DVSGSLVGYLSGENK	3	3	-1.2165			16283	16283	658.81	551.65	509.67	520.52	452.93	371.81	461.24	531.86	567.07
tr|A0A0P0W7K8|A0A0P0W7K8_ORYSJ;sp|Q7XLR1|PIP26_ORYSJ	270;275	tr|A0A0P0W7K8|A0A0P0W7K8_ORYSJ	tr|A0A0P0W7K8|A0A0P0W7K8_ORYSJ	>tr|A0A0P0W7K8|A0A0P0W7K8_ORYSJ Os04g0233400 protein (Fragment) OS=Oryza sativa subsp. japonica OX=39947 GN=Os04g0233400 PE=3 SV=1;>sp|Q7XLR1|PIP26_ORYSJ Probable aquaporin PIP2-6 OS=Oryza sativa subsp. japonica OX=39947 GN=PIP2-6 PE=2 SV=2	0.938818	0.000426832	63.038	2	S	YHQYILRAAAIKALGSFRSNPSN________	X;X;X;X;X;X;X;X;X;X;X;X;X;X;X;Phospho (STY);X;X;Phospho (STY);X;X;X;X;X;X;X;X;X;X;X;X	XXXXXXXXXXXXPPPPPPPPPPPXXXXXXXX	ALGS(0.939)FRS(0.531)NPS(0.531)N	4	2	-0.080283			1132;1134;1138	1134	65331	65244	64608	147800	143760	158030	91373	89660	93789
tr|A0A0P0W7K8|A0A0P0W7K8_ORYSJ;sp|Q7XLR1|PIP26_ORYSJ	273;278	tr|A0A0P0W7K8|A0A0P0W7K8_ORYSJ	tr|A0A0P0W7K8|A0A0P0W7K8_ORYSJ	>tr|A0A0P0W7K8|A0A0P0W7K8_ORYSJ Os04g0233400 protein (Fragment) OS=Oryza sativa subsp. japonica OX=39947 GN=Os04g0233400 PE=3 SV=1;>sp|Q7XLR1|PIP26_ORYSJ Probable aquaporin PIP2-6 OS=Oryza sativa subsp. japonica OX=39947 GN=PIP2-6 PE=2 SV=2	0.997238	2.84e-05	98.935	1;2	S	YILRAAAIKALGSFRSNPSN___________	X;X;X;X;X;X;X;X;X;X;X;X;Phospho (STY);X;X;Phospho (STY);X;X;Phospho (STY);X;X;X;X;X;X;X;X;X;X;X;X	XXXXXXXXXPPPPPPPPPPPXXXXXXXXXXX	ALGS(0.003)FRS(0.997)NPS(1)N	7	2	-0.3717			1128;1129;1130;1131;1132;1133;1134;1135;1136;1137;1138;1139;1140;1141	1136	202340	197280	192500	341780	335220	358340	262310	262560	265460
tr|A0A0P0W7K8|A0A0P0W7K8_ORYSJ;sp|Q7XLR1|PIP26_ORYSJ	276;281	tr|A0A0P0W7K8|A0A0P0W7K8_ORYSJ	tr|A0A0P0W7K8|A0A0P0W7K8_ORYSJ	>tr|A0A0P0W7K8|A0A0P0W7K8_ORYSJ Os04g0233400 protein (Fragment) OS=Oryza sativa subsp. japonica OX=39947 GN=Os04g0233400 PE=3 SV=1;>sp|Q7XLR1|PIP26_ORYSJ Probable aquaporin PIP2-6 OS=Oryza sativa subsp. japonica OX=39947 GN=PIP2-6 PE=2 SV=2	0.99997	2.84e-05	98.935	1;2	S	RAAAIKALGSFRSNPSN______________	X;X;X;X;X;X;X;X;X;X;X;X;Phospho (STY);X;X;Phospho (STY);X;X;X;X;X;X;X;X;X;X;X;X;X;X;X	XXXXXXPPPPPPPPPPPXXXXXXXXXXXXXX	ALGS(0.003)FRS(0.997)NPS(1)N	10	2	-0.3717			1126;1127;1132;1133;1134;1135;1136;1137;1139;1140;1141	1136	175290	170890	167110	313720	306770	328000	229790	229670	235020
sp|Q7XNY1|PIRL1_ORYSJ	337	sp|Q7XNY1|PIRL1_ORYSJ	sp|Q7XNY1|PIRL1_ORYSJ	>sp|Q7XNY1|PIRL1_ORYSJ Plant intracellular Ras-group-related LRR protein 1 OS=Oryza sativa subsp. japonica OX=39947 GN=IRL1 PE=2 SV=2	0.999999	0.00213926	70.631	1	S	RSLNGIASPRFLTMLSPRRLFSPRRNSPKHC	X;X;X;X;X;X;X;X;X;X;X;X;X;X;X;Phospho (STY);X;X;X;X;X;X;X;X;X;X;X;X;X;X;X	XXXXXXXXXXPPPPPPPPXXXXXXXXXXXXX	FLTMLS(1)PR	6	2	-0.67368			5634;5635;5636	5636	7597.4	7510.5	6723.1	7094.1	6993.3	7187.1	8659.5	8118.2	8137.2
sp|Q7XPL3|HAK15_ORYSJ	24	sp|Q7XPL3|HAK15_ORYSJ	sp|Q7XPL3|HAK15_ORYSJ	>sp|Q7XPL3|HAK15_ORYSJ Probable potassium transporter 15 OS=Oryza sativa subsp. japonica OX=39947 GN=HAK15 PE=2 SV=2	1	0.00655597	32.636	1	S	ASASAMGGGGMRKAPSMEWRWVSTEEDDEGE	X;X;X;X;X;X;X;X;X;X;X;X;X;X;X;Phospho (STY);X;X;X;X;X;X;X;X;X;X;X;X;X;X;X	XXXXXXXXXXXXPPPPPPPPXXXXXXXXXXX	KAPS(1)MEWR	4	3	-0.43666			8939;8940	8940	26492	26327	26337	23200	22431	25275	29198	28859	28690
tr|A0A0N7KJU4|A0A0N7KJU4_ORYSJ;sp|Q7XPM8|TIF3_ORYSJ	122;142	tr|A0A0N7KJU4|A0A0N7KJU4_ORYSJ	tr|A0A0N7KJU4|A0A0N7KJU4_ORYSJ	>tr|A0A0N7KJU4|A0A0N7KJU4_ORYSJ Os04g0653000 protein (Fragment) OS=Oryza sativa subsp. japonica OX=39947 GN=Os04g0653000 PE=3 SV=1;>sp|Q7XPM8|TIF3_ORYSJ Protein TIFY 3 OS=Oryza sativa subsp. japonica OX=39947 GN=TIFY3 PE=1 SV=1	0.796688	1.77e-28	108.66	1	S	NATQAAVSPVLTRSLSLQSTSVATGQPQVAA	X;X;X;X;X;X;X;X;X;X;X;X;X;X;X;Phospho (STY);X;X;X;X;X;X;X;X;X;X;X;X;X;X;X	XXXXXXXXXXXXXPPPPPPPPPPPPPPPPPP	S(0.188)LS(0.797)LQS(0.015)TSVATGQPQVAADPSSICK	3	4	3.0754			15223;15224;15225;15226;15227;15228	15228	15776	16212	15735	20339	20137	21432	23370	21595	23309
tr|A0A0P0WG33|A0A0P0WG33_ORYSJ;sp|Q7XPY2|PMA1_ORYSJ;tr|A0A0P0WFR6|A0A0P0WFR6_ORYSJ	284;545;165	tr|A0A0P0WG33|A0A0P0WG33_ORYSJ	tr|A0A0P0WG33|A0A0P0WG33_ORYSJ	>tr|A0A0P0WG33|A0A0P0WG33_ORYSJ Plasma membrane ATPase OS=Oryza sativa subsp. japonica OX=39947 GN=Os04g0656100 PE=3 SV=1;>sp|Q7XPY2|PMA1_ORYSJ Plasma membrane ATPase OS=Oryza sativa subsp. japonica OX=39947 GN=Os04g0656100 PE=2 SV=1;>tr|A0A0P0WFR6|A0A0P0W	1	7.77e-10	97.556	1	S	NMYPSSALLGQNKDASLEALPVDELIEKADG	X;X;X;X;X;X;X;X;X;X;X;X;X;X;X;Phospho (STY);X;X;X;X;X;X;X;X;X;X;X;X;X;X;X	XXXXXXXXXXXXXPPPPPPPPPPPPPPPXXX	DAS(1)LEALPVDELIEK	3	3	0.31376			2594;2595;2596;2597;2598	2598	10166	10191	9452.3	8594.7	9233.9	9548.5	11841	12235	11474
sp|Q7XSQ5|CDPKC_ORYSJ	70	sp|Q7XSQ5|CDPKC_ORYSJ	sp|Q7XSQ5|CDPKC_ORYSJ	>sp|Q7XSQ5|CDPKC_ORYSJ Calcium-dependent protein kinase 12 OS=Oryza sativa subsp. japonica OX=39947 GN=CPK12 PE=2 SV=2	1	2.07e-15	84.628	1	S	PTGSSSAAGALSRRASGGGGEMGPVLQRAMV	X;X;X;X;X;X;X;X;X;X;X;X;X;X;X;Phospho (STY);X;X;X;X;X;X;X;X;X;X;X;X;X;X;X	XXXXXXXXXXXXXPPPPPPPPPPPPPPPXXX	RAS(1)GGGGEMGPVLQR	3	3	-0.79974			13365;13366;13367;13368	13368	23364	21921	21274	19507	19351	18872	23283	24168	25640
sp|Q7XSQ5|CDPKC_ORYSJ	15	sp|Q7XSQ5|CDPKC_ORYSJ	sp|Q7XSQ5|CDPKC_ORYSJ	>sp|Q7XSQ5|CDPKC_ORYSJ Calcium-dependent protein kinase 12 OS=Oryza sativa subsp. japonica OX=39947 GN=CPK12 PE=2 SV=2	0.590435	2.62e-05	56.769	1	S	_MGNCFTKTYEIPITSGTMRRPASTAERSKA	X;X;X;X;X;X;X;X;X;X;X;X;X;X;X;Phospho (STY);X;X;X;X;X;X;X;X;X;X;X;X;X;X;X	XXXXXXXXPPPPPPPPPPPPXXXXXXXXXXX	TYEIPIT(0.031)S(0.59)GT(0.378)MR	8	2	-3.6653			17737	17737	4870.5	5116.3	4592.5	4023.1	3904.6	4292.8	5464.5	4660.7	5463.6
sp|Q7XSQ9|PIP12_ORYSJ	28	sp|Q7XSQ9|PIP12_ORYSJ	sp|Q7XSQ9|PIP12_ORYSJ	>sp|Q7XSQ9|PIP12_ORYSJ Probable aquaporin PIP1-2 OS=Oryza sativa subsp. japonica OX=39947 GN=PIP1-2 PE=2 SV=3	0.781746	5.47e-07	46.315	1	S	NKFSERQPIGTAAQGSDDKDYKEPPPAPLFE	X;X;X;X;X;X;X;X;X;X;X;X;X;X;X;Phospho (STY);X;X;X;X;X;X;X;X;X;X;X;X;X;X;X	XXXXXXPPPPPPPPPPPPPPPPPPPPPPPPP	QPIGT(0.182)AAQGS(0.782)DDKDY(0.036)KEPPPAPLFEPGELK	10	4	-1.488			13076	13076	3232.1	3281.7	3050.1	3196.3	3056.7	3425.3	4297.4	4354.9	4431
sp|Q7XTE8|14332_ORYSJ	243	sp|Q7XTE8|14332_ORYSJ	sp|Q7XTE8|14332_ORYSJ	>sp|Q7XTE8|14332_ORYSJ 14-3-3-like protein GF14-B OS=Oryza sativa subsp. japonica OX=39947 GN=GF14B PE=1 SV=2	0.984249	4.04e-12	77.598	1	S	MQLLRDNLTLWTSDISEDTAEEIREAPKRDS	X;X;X;X;X;X;X;X;X;X;X;X;X;X;X;Phospho (STY);X;X;X;X;X;X;X;X;X;X;X;X;X;X;Phospho (STY)	XXXXXPPPPPPPPPPPPPPPPPPPXXXXXXX	DNLTLWT(0.004)S(0.004)DIS(0.984)EDT(0.007)AEEIR	11	3	-1.1795			3206;3207;3208	3206	2266.4	2034.1	1810.9	2169	1980.7	1890.4	2109	2144.7	2555.2
sp|Q7XTE8|14332_ORYSJ	258	sp|Q7XTE8|14332_ORYSJ	sp|Q7XTE8|14332_ORYSJ	>sp|Q7XTE8|14332_ORYSJ 14-3-3-like protein GF14-B OS=Oryza sativa subsp. japonica OX=39947 GN=GF14B PE=1 SV=2	0.78002	0.00077271	59.704	1	S	SEDTAEEIREAPKRDSSEGQ___________	Phospho (STY);X;X;X;X;X;X;X;X;X;X;X;X;X;X;Phospho (STY);X;X;X;X;X;X;X;X;X;X;X;X;X;X;X	XXXXXXXXXPPPPPPPPPPPXXXXXXXXXXX	EAPKRDS(0.78)S(0.22)EGQ	7	2	0.3952			3717;3718;3719;3720	3718	16820	15902	16770	17221	17268	17591	19902	19516	19725
sp|Q7XTE8|14332_ORYSJ	259	sp|Q7XTE8|14332_ORYSJ	sp|Q7XTE8|14332_ORYSJ	>sp|Q7XTE8|14332_ORYSJ 14-3-3-like protein GF14-B OS=Oryza sativa subsp. japonica OX=39947 GN=GF14B PE=1 SV=2	0.778492	0.00068295	62.071	1	S	EDTAEEIREAPKRDSSEGQ____________	X;X;X;X;X;X;X;X;X;X;X;X;X;X;X;Phospho (STY);X;X;X;X;X;X;X;X;X;X;X;X;X;X;X	XXXXXXXXPPPPPPPPPPPXXXXXXXXXXXX	EAPKRDS(0.222)S(0.778)EGQ	8	3	-0.22967			3717;3719;3721	3721	18223	18055	18321	19514	19555	20465	21483	22005	20969
sp|Q7XTS4|AGO2_ORYSJ	237	sp|Q7XTS4|AGO2_ORYSJ	sp|Q7XTS4|AGO2_ORYSJ	>sp|Q7XTS4|AGO2_ORYSJ Protein argonaute 2 OS=Oryza sativa subsp. japonica OX=39947 GN=AGO2 PE=2 SV=2	0.905884	0.0136695	45.806	1	S	STVFHYDIDIKLDISSPKASDKELSKGDFLT	X;X;X;X;X;X;X;X;X;X;X;X;X;X;X;Phospho (STY);X;X;X;X;X;X;X;X;X;X;X;X;X;X;X	XXXXXXXXXXXPPPPPPPXXXXXXXXXXXXX	LDIS(0.094)S(0.906)PK	5	2	1.3479			9889	9889	18615	18135	18148	19001	18951	19238	21592	22450	21938
sp|Q7XUF4|CDKG2_ORYSJ	270	sp|Q7XUF4|CDKG2_ORYSJ	sp|Q7XUF4|CDKG2_ORYSJ	>sp|Q7XUF4|CDKG2_ORYSJ Cyclin-dependent kinase G-2 OS=Oryza sativa subsp. japonica OX=39947 GN=CDKG-2 PE=2 SV=2	1	1.14e-15	103.72	1;2	S	SPADSAELGQRKKALSPELGEVVASDISGGR	X;X;X;X;X;X;X;X;X;X;X;X;X;X;X;Phospho (STY);X;X;X;X;X;X;X;X;X;X;X;Phospho (STY);X;X;X	XXXXXXXXXXXXXPPPPPPPPPPPPPPPPPP	ALS(1)PELGEVVASDISGGR	3	3	-1.5078			1232;1233;1234;1235;1236;1237;1238;1239;1240;1241	1237	12086	11540	10326	12072	12554	11913	11740	12522	12287
sp|Q7XUF4|CDKG2_ORYSJ	282	sp|Q7XUF4|CDKG2_ORYSJ	sp|Q7XUF4|CDKG2_ORYSJ	>sp|Q7XUF4|CDKG2_ORYSJ Cyclin-dependent kinase G-2 OS=Oryza sativa subsp. japonica OX=39947 GN=CDKG-2 PE=2 SV=2	0.979188	3.86e-11	70.476	2	S	KALSPELGEVVASDISGGRTMSRSSDSGRLG	X;X;X;Phospho (STY);X;X;X;X;X;X;X;X;X;X;X;Phospho (STY);X;X;X;X;X;X;X;X;X;X;X;X;X;X;X	XPPPPPPPPPPPPPPPPPPXXXXXXXXXXXX	ALS(1)PELGEVVAS(0.021)DIS(0.979)GGR	15	3	0.14536			1238;1239;1240;1241	1239	2648.5	2478.3	2523.1	2553.1	2444.4	2487.7	2308.1	2602.4	2577.9
sp|Q7XUF4|CDKG2_ORYSJ	132	sp|Q7XUF4|CDKG2_ORYSJ	sp|Q7XUF4|CDKG2_ORYSJ	>sp|Q7XUF4|CDKG2_ORYSJ Cyclin-dependent kinase G-2 OS=Oryza sativa subsp. japonica OX=39947 GN=CDKG-2 PE=2 SV=2	0.790524	6.09e-37	144.94	1	S	SSSRDGESVVAASASSPSKKRKFSPIIWDRD	X;X;X;X;X;X;X;X;X;X;X;X;X;X;X;Phospho (STY);X;X;X;X;X;X;X;X;X;X;X;X;X;X;X	XXXXPPPPPPPPPPPPPPPPXXXXXXXXXXX	DGESVVAAS(0.003)AS(0.194)S(0.791)PS(0.012)K	12	2	-3.6638			2776;2777;2778;2779;2780	2777	35193	33418	30718	34434	34395	34489	33470	35253	33220
sp|Q7XUF4|CDKG2_ORYSJ	687	sp|Q7XUF4|CDKG2_ORYSJ	sp|Q7XUF4|CDKG2_ORYSJ	>sp|Q7XUF4|CDKG2_ORYSJ Cyclin-dependent kinase G-2 OS=Oryza sativa subsp. japonica OX=39947 GN=CDKG-2 PE=2 SV=2	0.999998	3.12e-06	71.743	1	S	PALNELDRRTKRYLKSPDPLEEQRLKELQGN	X;X;X;X;X;X;X;X;X;X;X;X;X;X;X;Phospho (STY);X;X;X;X;X;X;X;X;X;X;X;X;X;X;X	XXXXXXXXXXXXPPPPPPPPPPPPXXXXXXX	YLKS(1)PDPLEEQR	4	3	-0.3899			19921;19922;19923;19924;19925;19926	19923	46351	44701	42903	46985	46277	48118	45895	45569	43983
sp|Q7XVF9|P2C39_ORYSJ	107	sp|Q7XVF9|P2C39_ORYSJ	sp|Q7XVF9|P2C39_ORYSJ	>sp|Q7XVF9|P2C39_ORYSJ Probable protein phosphatase 2C 39 OS=Oryza sativa subsp. japonica OX=39947 GN=Os04g0403701 PE=2 SV=2	0.5	0.00617792	32.818	1	S	ICKGLIGEEILPELDSPNSFRKIVSSPSMSR	X;X;X;X;X;X;X;X;X;X;X;X;X;X;X;Phospho (STY);X;X;X;X;X;X;X;X;X;X;X;X;X;X;X	XXXPPPPPPPPPPPPPPPPPPPXXXXXXXXX	GLIGEEILPELDS(0.5)PNS(0.5)FRK	13	4	1.7431			6975	6975	658.16	632.01	566.95	732.42	380.8	495.16	598.6	712.84	516.95
sp|Q7XVF9|P2C39_ORYSJ	110	sp|Q7XVF9|P2C39_ORYSJ	sp|Q7XVF9|P2C39_ORYSJ	>sp|Q7XVF9|P2C39_ORYSJ Probable protein phosphatase 2C 39 OS=Oryza sativa subsp. japonica OX=39947 GN=Os04g0403701 PE=2 SV=2	0.5	0.00617792	32.818	1	S	GLIGEEILPELDSPNSFRKIVSSPSMSRLDL	X;X;X;X;X;X;X;X;X;X;X;X;X;X;X;X;X;X;X;X;X;X;X;X;X;X;X;X;X;X;X	XXXXXXXXXXXXXXXXXXXXXXXXXXXXXXX	GLIGEEILPELDS(0.5)PNS(0.5)FRK	16	4	1.7431			6975	6975	658.16	632.01	566.95	732.42	380.8	495.16	598.6	712.84	516.95
sp|Q7XVF9|P2C39_ORYSJ	132	sp|Q7XVF9|P2C39_ORYSJ	sp|Q7XVF9|P2C39_ORYSJ	>sp|Q7XVF9|P2C39_ORYSJ Probable protein phosphatase 2C 39 OS=Oryza sativa subsp. japonica OX=39947 GN=Os04g0403701 PE=2 SV=2	0.643813	1.63e-09	63.609	1	S	SPSMSRLDLLSTSQGSPVSTESSIFEISKNI	X;X;X;X;X;X;X;X;X;X;X;X;X;X;X;Phospho (STY);X;X;X;X;X;X;X;X;X;X;X;X;X;X;X	XXXXXXPPPPPPPPPPPPPPPPPPPPPPPXX	LDLLST(0.002)S(0.006)QGS(0.644)PVS(0.166)T(0.166)ES(0.012)S(0.003)IFEISK	10	3	2.9197			9892;9893	9892	2351.5	1578.1	1743.9	1825.2	2137	2211.5	1479.6	1681.6	1430.3
sp|Q7XWP1|CPSF1_ORYSJ	477	sp|Q7XWP1|CPSF1_ORYSJ	sp|Q7XWP1|CPSF1_ORYSJ	>sp|Q7XWP1|CPSF1_ORYSJ Probable cleavage and polyadenylation specificity factor subunit 1 OS=Oryza sativa subsp. japonica OX=39947 GN=Os04g0252200 PE=3 SV=2	0.98626	1.67e-08	59.117	1	S	IEGDLPFSKRLKRIPSDVLQDVTSVEELSFQ	X;X;X;X;X;X;X;X;X;X;X;X;X;X;X;Phospho (STY);X;X;X;X;X;X;X;X;X;X;X;X;X;X;X	XXXXXXXXXXXXPPPPPPPPPPPPPPPPPPP	RIPS(0.986)DVLQDVT(0.007)S(0.007)VEELS(0.001)FQNIIAPNSLESAQK	4	4	-0.079942			13536;13537;13538	13536	738.21	718.52	602.7	1425.4	946.57	1019.9	982.38	1368.9	1148.9
tr|A0A0N7KIK8|A0A0N7KIK8_ORYSJ;sp|Q7XX84|ETR2_ORYSJ	443;443	tr|A0A0N7KIK8|A0A0N7KIK8_ORYSJ	tr|A0A0N7KIK8|A0A0N7KIK8_ORYSJ	>tr|A0A0N7KIK8|A0A0N7KIK8_ORYSJ Os04g0169100 protein OS=Oryza sativa subsp. japonica OX=39947 GN=Os04g0169100 PE=4 SV=1;>sp|Q7XX84|ETR2_ORYSJ Ethylene receptor 2 OS=Oryza sativa subsp. japonica OX=39947 GN=ETR2 PE=1 SV=1	0.999993	0.0154545	38.743	1	S	MNDVMQTSTVNREYLSLVRRAFNLHSLVKEA	X;X;X;X;X;X;X;X;X;X;X;X;X;X;X;Phospho (STY);X;X;X;X;X;X;X;X;X;X;X;X;X;X;X	XXXXXXXXXXXXPPPPPPPXXXXXXXXXXXX	EYLS(1)LVR	4	2	-0.51881			5128	5128	10483	10459	10310	9983.4	9271.5	8984.4	11540	11136	10364
sp|Q7Y0V7|ROC6_ORYSJ	871	sp|Q7Y0V7|ROC6_ORYSJ	sp|Q7Y0V7|ROC6_ORYSJ	>sp|Q7Y0V7|ROC6_ORYSJ Homeobox-leucine zipper protein ROC6 OS=Oryza sativa subsp. japonica OX=39947 GN=ROC6 PE=2 SV=2	0.999998	0.000224132	78.896	1	S	CTIQKIKSALQASIISP______________	X;X;X;X;X;X;X;X;X;X;X;X;X;X;X;Phospho (STY);X;X;X;X;X;X;X;X;X;X;X;X;X;X;X	XXXXXXXPPPPPPPPPPXXXXXXXXXXXXXX	SALQASIIS(1)P	9	2	-0.12453			14080;14081;14082;14083	14081	5817.5	6601.8	5812.7	6088.5	5714.3	5920.7	6052.7	6818.5	6311.4
tr|A0A0P0VYT7|A0A0P0VYT7_ORYSJ;sp|Q7Y1L9|SP1L1_ORYSJ	32;96	tr|A0A0P0VYT7|A0A0P0VYT7_ORYSJ	tr|A0A0P0VYT7|A0A0P0VYT7_ORYSJ	>tr|A0A0P0VYT7|A0A0P0VYT7_ORYSJ Os03g0417800 protein (Fragment) OS=Oryza sativa subsp. japonica OX=39947 GN=Os03g0417800 PE=3 SV=1;>sp|Q7Y1L9|SP1L1_ORYSJ Protein SPIRAL1-like 1 OS=Oryza sativa subsp. japonica OX=39947 GN=Os03g0417800 PE=3 SV=1	0.907038	2.94e-07	59.872	1	S	RADGQNTGNFLTDRPSTKVHAAPGGGSSLGY	X;X;X;X;X;X;X;X;X;X;X;X;X;X;X;Phospho (STY);X;X;X;X;X;X;X;X;X;X;X;X;X;X;X	XPPPPPPPPPPPPPPPPPXXXXXXXXXXXXX	ADGQNTGNFLT(0.011)DRPS(0.907)T(0.082)K	15	3	-0.62386			441;442	442	18334	16867	17540	10582	10727	10273	16226	16802	17430
sp|Q84JI0|P2C30_ORYSJ	335	sp|Q84JI0|P2C30_ORYSJ	sp|Q84JI0|P2C30_ORYSJ	>sp|Q84JI0|P2C30_ORYSJ Probable protein phosphatase 2C 30 OS=Oryza sativa subsp. japonica OX=39947 GN=PP2C30 PE=1 SV=1	0.999055	0.000833055	52.974	1	S	SGRRERNRSSPTSNLSPRQSSSSGDEAPNDG	X;X;X;X;X;X;X;X;X;X;X;X;X;X;X;Phospho (STY);X;X;X;X;X;X;X;X;X;X;X;X;X;X;X	XXXXXXXXPPPPPPPPPPXXXXXXXXXXXXX	SSPTS(0.001)NLS(0.999)PR	8	2	0.68275			15809;15810;15811	15811	55790	51509	49820	43246	41843	42695	49032	49814	47490
sp|Q84NP7|AMPD_ORYSJ	255	sp|Q84NP7|AMPD_ORYSJ	sp|Q84NP7|AMPD_ORYSJ	>sp|Q84NP7|AMPD_ORYSJ Probable AMP deaminase OS=Oryza sativa subsp. japonica OX=39947 GN=AMPD PE=2 SV=1	0.443017	0.00073987	36.362		S	REEVAPWEKEIITDPSTPKPNPNPFYYEQQT	X;X;X;X;X;X;X;X;X;X;X;X;X;X;X;Phospho (STY);X;X;X;X;X;X;X;X;X;X;X;X;X;X;X	XXXXXXXXXPPPPPPPPPPPPPPPPPPPPPP	EIIT(0.041)DPS(0.443)T(0.443)PKPNPNPFY(0.055)Y(0.018)EQQTK	7	4	1.8568				4174	0	0	0	0	0	0	0	0	0
sp|Q84P97|VDAC5_ORYSJ	208	sp|Q84P97|VDAC5_ORYSJ	sp|Q84P97|VDAC5_ORYSJ	>sp|Q84P97|VDAC5_ORYSJ Mitochondrial outer membrane protein porin 5 OS=Oryza sativa subsp. japonica OX=39947 GN=VDAC5 PE=2 SV=1	0.492922	0.00245192	33.145		S	DKQKSSVVAELTRRLSTNENTLTVGGLYKVD	X;X;X;X;X;X;X;X;X;X;X;X;X;X;X;Phospho (STY);X;X;X;X;X;X;X;X;X;X;X;X;X;X;X	XXXXXXXXXXXXXPPPPPPPPPPPPPPPPXX	RLS(0.493)T(0.493)NENT(0.014)LT(0.001)VGGLYK	3	3	-0.69566				13619	0	0	0	0	0	0	0	0	0
sp|Q84PB3|IF4G1_ORYSJ	37	sp|Q84PB3|IF4G1_ORYSJ	sp|Q84PB3|IF4G1_ORYSJ	>sp|Q84PB3|IF4G1_ORYSJ Eukaryotic translation initiation factor isoform 4G-1 OS=Oryza sativa subsp. japonica OX=39947 GN=Os04g0499300 PE=2 SV=2	0.773601	3.06e-05	44.019	1	S	PGRLFSPAFAAAASGSGDLLRSHVGGASKIG	X;X;X;X;X;X;X;X;X;X;X;X;X;X;X;Phospho (STY);X;X;X;X;X;X;X;X;X;X;X;X;X;X;X	XXXPPPPPPPPPPPPPPPPPPXXXXXXXXXX	LFSPAFAAAAS(0.226)GS(0.774)GDLLR	13	3	-0.33693			10086;10087	10087	862.3	909.69	822.45	660.68	802.3	713.67	801.32	846.12	1101.3
tr|A0A0N7KNP7|A0A0N7KNP7_ORYSJ;sp|Q84SL0|CDPKK_ORYSJ	379;543	tr|A0A0N7KNP7|A0A0N7KNP7_ORYSJ	tr|A0A0N7KNP7|A0A0N7KNP7_ORYSJ	>tr|A0A0N7KNP7|A0A0N7KNP7_ORYSJ Os07g0568600 protein (Fragment) OS=Oryza sativa subsp. japonica OX=39947 GN=Os07g0568600 PE=4 SV=1;>sp|Q84SL0|CDPKK_ORYSJ Calcium-dependent protein kinase 20 OS=Oryza sativa subsp. japonica OX=39947 GN=CPK20 PE=2 SV=2	0.881111	0.00512118	52.332	1	S	RERFTSLSLKLQKDGSLQLTTTQ________	X;X;X;X;X;X;X;Phospho (STY);X;X;X;X;X;X;X;Phospho (STY);X;X;X;X;X;X;X;X;X;X;X;X;X;X;X	XXXXXXXXXXXXXPPPPPPPPPPXXXXXXXX	DGS(0.881)LQLT(0.089)T(0.029)T(0.001)Q	3	2	0.29326			2863	2863	5340.8	4733.1	4236.8	4993	5188.8	5170.2	5044.4	6192.2	5290.5
tr|A0A0N7KNP7|A0A0N7KNP7_ORYSJ;sp|Q84SL0|CDPKK_ORYSJ	371;535	tr|A0A0N7KNP7|A0A0N7KNP7_ORYSJ	tr|A0A0N7KNP7|A0A0N7KNP7_ORYSJ	>tr|A0A0N7KNP7|A0A0N7KNP7_ORYSJ Os07g0568600 protein (Fragment) OS=Oryza sativa subsp. japonica OX=39947 GN=Os07g0568600 PE=4 SV=1;>sp|Q84SL0|CDPKK_ORYSJ Calcium-dependent protein kinase 20 OS=Oryza sativa subsp. japonica OX=39947 GN=CPK20 PE=2 SV=2	0.994247	0.00570531	56.034	1	S	RKASRQYSRERFTSLSLKLQKDGSLQLTTTQ	X;X;X;X;X;X;X;X;X;X;X;X;X;X;X;Phospho (STY);X;X;X;X;X;X;X;Phospho (STY);X;X;X;Phospho (STY);X;X;X	XXXXXXXXXXXPPPPPPPXXXXXXXXXXXXX	FT(0.001)S(0.005)LS(0.994)LK	5	2	0.81313			5770;5771;5772	5772	45222	42822	42968	44496	44850	45839	58623	58788	59877
sp|Q84T65|BRXL4_ORYSJ;tr|A0A0P0W5K4|A0A0P0W5K4_ORYSJ	192;209	sp|Q84T65|BRXL4_ORYSJ	sp|Q84T65|BRXL4_ORYSJ	>sp|Q84T65|BRXL4_ORYSJ Protein Brevis radix-like 4 OS=Oryza sativa subsp. japonica OX=39947 GN=BRXL4 PE=3 SV=1;>tr|A0A0P0W5K4|A0A0P0W5K4_ORYSJ Os03g0853500 protein OS=Oryza sativa subsp. japonica OX=39947 GN=Os03g0853500 PE=3 SV=1	0.416019	0.0165297	8.8926		S	AATPSPAPLTPDRVTSWSAFVRPPSASRQQQ	X;X;X;X;X;X;X;X;X;X;X;X;X;X;X;Phospho (STY);X;X;X;X;X;X;X;X;X;X;X;X;X;X;X	XXXXXXXXXXXXXPPPPPPPPPPPPPPPXXX	VT(0.36)S(0.416)WS(0.102)AFVRPPS(0.061)AS(0.061)R	3	2	1.4385				19142	0	0	0	0	0	0	0	0	0
sp|Q84UQ1|RH42_ORYSJ	3	sp|Q84UQ1|RH42_ORYSJ	sp|Q84UQ1|RH42_ORYSJ	>sp|Q84UQ1|RH42_ORYSJ DEAD-box ATP-dependent RNA helicase 42 OS=Oryza sativa subsp. japonica OX=39947 GN=Os08g0159900 PE=2 SV=1	0.808577	0.000196561	98.48	1	S	_____________MGSSDEAGSSKHHRRDKE	X;X;X;X;X;X;X;X;X;X;X;X;X;X;X;Phospho (STY);X;X;X;X;X;X;X;X;X;X;X;X;X;X;X	XXXXXXXXXXXXXXPPPPPPPPPPXXXXXXX	GS(0.809)S(0.191)DEAGSSK	2	2	-0.29972			7410	7410	8294.9	7949.6	7071.9	8478.6	9547.6	9902.1	8003.5	8366.6	8196
sp|Q84UQ1|RH42_ORYSJ	4	sp|Q84UQ1|RH42_ORYSJ	sp|Q84UQ1|RH42_ORYSJ	>sp|Q84UQ1|RH42_ORYSJ DEAD-box ATP-dependent RNA helicase 42 OS=Oryza sativa subsp. japonica OX=39947 GN=Os08g0159900 PE=2 SV=1	0.935136	8.82e-05	107.91	1	S	____________MGSSDEAGSSKHHRRDKEK	X;X;X;X;X;X;X;X;X;X;X;X;X;X;X;Phospho (STY);X;X;X;X;X;X;X;X;X;X;X;X;X;X;X	XXXXXXXXXXXXXPPPPPPPPPPXXXXXXXX	GS(0.065)S(0.935)DEAGSSK	3	2	0.92359			7408;7409	7409	11758	11352	10261	13481	13570	14130	11795	11449	11658
sp|Q84UQ3|C3H56_ORYSJ	56	sp|Q84UQ3|C3H56_ORYSJ	sp|Q84UQ3|C3H56_ORYSJ	>sp|Q84UQ3|C3H56_ORYSJ Zinc finger CCCH domain-containing protein 56 OS=Oryza sativa subsp. japonica OX=39947 GN=Os08g0159800 PE=4 SV=1	1	0.00988132	30.942	1	S	QWNADGGGGGSSRAGSEQPPPGKKSRGGGGG	X;X;X;X;X;X;X;X;X;X;X;X;X;X;X;Phospho (STY);X;X;X;X;X;X;X;X;X;X;X;X;X;X;X	XXXXXXXXXXXXXPPPPPPPPPPPXXXXXXX	AGS(1)EQPPPGKK	3	3	-1.1175			817	817	14255	13347	14034	16251	14871	15953	13742	14051	14903
sp|Q84ZN6|CESA8_ORYSJ	131	sp|Q84ZN6|CESA8_ORYSJ	sp|Q84ZN6|CESA8_ORYSJ	>sp|Q84ZN6|CESA8_ORYSJ Probable cellulose synthase A catalytic subunit 8 [UDP-forming] OS=Oryza sativa subsp. japonica OX=39947 GN=CESA8 PE=1 SV=1	0.999902	7.49e-05	75.781	1	S	MNAGGGGDVGRPKYDSGEIGLTKYDSGEIPR	X;X;X;X;X;X;X;X;X;X;X;X;X;X;X;Phospho (STY);X;X;X;X;X;X;X;X;X;Phospho (STY);X;X;X;X;X	XXXXXXXXXXXXXPPPPPPPPPPXXXXXXXX	YDS(1)GEIGLTK	3	3	-0.38444			19670;19671;19672;19673;19674	19674	47479	46912	47691	39415	38422	39542	57950	59760	61036
sp|Q84ZN6|CESA8_ORYSJ;sp|Q84M43|CESA2_ORYSJ	141;135	sp|Q84ZN6|CESA8_ORYSJ	sp|Q84ZN6|CESA8_ORYSJ	>sp|Q84ZN6|CESA8_ORYSJ Probable cellulose synthase A catalytic subunit 8 [UDP-forming] OS=Oryza sativa subsp. japonica OX=39947 GN=CESA8 PE=1 SV=1;>sp|Q84M43|CESA2_ORYSJ Probable cellulose synthase A catalytic subunit 2 [UDP-forming] OS=Oryza sativa subsp.	0.998722	1.4e-10	67.134	1	S	RPKYDSGEIGLTKYDSGEIPRGYIPSVTNSQ	X;X;X;X;X;Phospho (STY);X;X;X;X;X;X;X;X;X;Phospho (STY);X;X;X;X;X;X;X;X;X;X;X;X;X;X;X	XXXPPPPPPPPPPPPPPPPPPXXXXXXXXXX	Y(0.001)DS(0.999)GEIPR	3	2	-0.69937			19675;19676;19677;19678;19679;19680	19678	53151	49421	50741	44783	43079	47096	61636	61980	63705
sp|Q8H398|SPX6_ORYSJ	229	sp|Q8H398|SPX6_ORYSJ	sp|Q8H398|SPX6_ORYSJ	>sp|Q8H398|SPX6_ORYSJ SPX domain-containing protein 6 OS=Oryza sativa subsp. japonica OX=39947 GN=SPX6 PE=2 SV=2	0.998628	0.00363546	47.063	1	S	LTLPDSDWLRSFQPPSPIPIQ__________	X;X;X;X;X;X;X;X;X;X;X;X;X;X;X;Phospho (STY);X;X;X;X;X;X;X;X;X;X;X;X;X;X;X	XXXXXXXXXXPPPPPPPPPPPXXXXXXXXXX	S(0.001)FQPPS(0.999)PIPIQ	6	2	-0.78309			14556;14557;14558	14556	2899	2968.9	2197.5	3157.7	3080.6	3019.7	2832.3	2360.2	2756.1
sp|Q8H4S6|P2C64_ORYSJ	413	sp|Q8H4S6|P2C64_ORYSJ	sp|Q8H4S6|P2C64_ORYSJ	>sp|Q8H4S6|P2C64_ORYSJ Probable protein phosphatase 2C 64 OS=Oryza sativa subsp. japonica OX=39947 GN=Os07g0566200 PE=2 SV=2	1	0.0302225	8.8286	1	S	NDQNWSGLDGVTRVNSLVQLPRFSEERAIG_	X;X;X;X;X;X;X;X;X;X;X;X;X;X;X;Phospho (STY);X;X;X;X;X;X;X;X;X;X;X;X;X;X;X	XXXXXXXXXXXXXPPPPPPPPPXXXXXXXXX	VNS(1)LVQLPR	3	2	-0.0894			18697	18697	2924	2840	2599.3	2539.9	2490.4	3232.8	2553.6	2566.5	2772
sp|Q8H5N9|PIP21_ORYSJ	285	sp|Q8H5N9|PIP21_ORYSJ	sp|Q8H5N9|PIP21_ORYSJ	>sp|Q8H5N9|PIP21_ORYSJ Probable aquaporin PIP2-1 OS=Oryza sativa subsp. japonica OX=39947 GN=PIP2-1 PE=2 SV=1	1	0.00168511	62.944	2	S	YHQYILRAGAIKALGSFRSNA__________	X;X;X;X;X;X;X;X;X;X;X;X;X;X;X;Phospho (STY);X;X;Phospho (STY);X;X;X;X;X;X;X;X;X;X;X;X	XXXXXXXXXXXXPPPPPPPPPXXXXXXXXXX	ALGS(1)FRS(1)NA	4	2	-0.84385			1117;1118;1119;1120;1121;1122;1123;1124	1124	85518	84673	80970	198920	187220	207450	131700	134300	134190
sp|Q8H5N9|PIP21_ORYSJ	288	sp|Q8H5N9|PIP21_ORYSJ	sp|Q8H5N9|PIP21_ORYSJ	>sp|Q8H5N9|PIP21_ORYSJ Probable aquaporin PIP2-1 OS=Oryza sativa subsp. japonica OX=39947 GN=PIP2-1 PE=2 SV=1	1	0.00168511	62.944	1;2	S	YILRAGAIKALGSFRSNA_____________	X;X;X;X;X;X;X;X;X;X;X;X;Phospho (STY);X;X;Phospho (STY);X;X;X;X;X;X;X;X;X;X;X;X;X;X;X	XXXXXXXXXPPPPPPPPPXXXXXXXXXXXXX	ALGS(1)FRS(1)NA	7	2	-0.84385			1117;1118;1119;1120;1121;1122;1123;1124;1125	1124	96078	95615	91201	208440	196960	216520	142820	145530	144920
sp|Q8H5N9|PIP21_ORYSJ	9	sp|Q8H5N9|PIP21_ORYSJ	sp|Q8H5N9|PIP21_ORYSJ	>sp|Q8H5N9|PIP21_ORYSJ Probable aquaporin PIP2-1 OS=Oryza sativa subsp. japonica OX=39947 GN=PIP2-1 PE=2 SV=1	1	3.66e-19	127.3	1	S	_______MGKDEVMESGGAAGEFAAKDYTDP	X;X;X;X;X;X;X;X;X;X;X;X;X;X;X;Phospho (STY);X;X;X;X;X;X;X;X;X;X;X;X;X;X;X	XXXXXXXXPPPPPPPPPPPPPPPPPPXXXXX	GKDEVMES(1)GGAAGEFAAK	8	3	0.41933			6840;6841;6842	6842	21750	19297	19684	19872	21248	20532	26244	25975	26413
tr|A0A0P0V8P3|A0A0P0V8P3_ORYSJ;sp|Q8LIY0|CSLC1_ORYSJ	77;595	tr|A0A0P0V8P3|A0A0P0V8P3_ORYSJ	tr|A0A0P0V8P3|A0A0P0V8P3_ORYSJ	>tr|A0A0P0V8P3|A0A0P0V8P3_ORYSJ Os01g0766900 protein OS=Oryza sativa subsp. japonica OX=39947 GN=Os01g0766900 PE=4 SV=1;>sp|Q8LIY0|CSLC1_ORYSJ Probable xyloglucan glycosyltransferase 1 OS=Oryza sativa subsp. japonica OX=39947 GN=CSLC1 PE=3 SV=1	0.49963	0.000248225	47.301		S	LGSAYEWVVTKKSGRSSEGDLVSLVEKQPKQ	X;X;X;X;X;X;X;X;X;X;X;X;X;X;X;Phospho (STY);X;X;X;X;X;X;X;X;X;X;X;X;X;X;X	XXXXXXXXXXXXXXXPPPPPPPPPPPPXXXX	S(0.5)S(0.5)EGDLVS(0.001)LVEK	1	3	-1.5448				15673	0	0	0	0	0	0	0	0	0
tr|A0A0P0V8P3|A0A0P0V8P3_ORYSJ;sp|Q8LIY0|CSLC1_ORYSJ	78;596	tr|A0A0P0V8P3|A0A0P0V8P3_ORYSJ	tr|A0A0P0V8P3|A0A0P0V8P3_ORYSJ	>tr|A0A0P0V8P3|A0A0P0V8P3_ORYSJ Os01g0766900 protein OS=Oryza sativa subsp. japonica OX=39947 GN=Os01g0766900 PE=4 SV=1;>sp|Q8LIY0|CSLC1_ORYSJ Probable xyloglucan glycosyltransferase 1 OS=Oryza sativa subsp. japonica OX=39947 GN=CSLC1 PE=3 SV=1	0.49963	0.000248225	47.301		S	GSAYEWVVTKKSGRSSEGDLVSLVEKQPKQQ	X;X;X;X;X;X;X;X;X;X;X;X;X;X;X;X;X;X;X;X;X;X;X;X;X;X;X;X;X;X;X	XXXXXXXXXXXXXXXXXXXXXXXXXXXXXXX	S(0.5)S(0.5)EGDLVS(0.001)LVEK	2	3	-1.5448				15673	0	0	0	0	0	0	0	0	0
tr|A0A0P0V8P3|A0A0P0V8P3_ORYSJ;sp|Q8LIY0|CSLC1_ORYSJ	97;615	tr|A0A0P0V8P3|A0A0P0V8P3_ORYSJ	tr|A0A0P0V8P3|A0A0P0V8P3_ORYSJ	>tr|A0A0P0V8P3|A0A0P0V8P3_ORYSJ Os01g0766900 protein OS=Oryza sativa subsp. japonica OX=39947 GN=Os01g0766900 PE=4 SV=1;>sp|Q8LIY0|CSLC1_ORYSJ Probable xyloglucan glycosyltransferase 1 OS=Oryza sativa subsp. japonica OX=39947 GN=CSLC1 PE=3 SV=1	0.999543	0.000737015	41.614	1	S	LVSLVEKQPKQQRVGSAPNLDSLAKESHPKK	X;X;X;X;X;X;X;X;X;X;X;X;X;X;X;Phospho (STY);X;X;X;X;X;X;X;X;X;X;X;X;X;X;X	XXXXXXXXXXXXXPPPPPPPPPPPPXXXXXX	VGS(1)APNLDSLAK	3	3	-0.4824			18365;18366	18366	11294	10653	10452	9304.1	10199	9996.4	10564	11985	10710
sp|Q8LPZ7|CDPK3_ORYSJ	535	sp|Q8LPZ7|CDPK3_ORYSJ	sp|Q8LPZ7|CDPK3_ORYSJ	>sp|Q8LPZ7|CDPK3_ORYSJ Calcium-dependent protein kinase 3 OS=Oryza sativa subsp. japonica OX=39947 GN=CPK3 PE=2 SV=1	0.5	0.0264824	41.248	1	S	DWRKASRHYSRGRFNSLSMKLIKDGSVKLVN	X;X;X;X;X;X;X;X;X;X;X;X;X;X;X;Phospho (STY);X;X;X;X;X;X;X;X;X;X;X;X;X;X;X	XXXXXXXXXXXXXPPPPPPPXXXXXXXXXXX	FNS(0.5)LS(0.5)MK	3	2	-0.50737			5663	5663	20399	18712	17830	15294	16032	17245	18306	20201	19253
sp|Q8LPZ7|CDPK3_ORYSJ	537	sp|Q8LPZ7|CDPK3_ORYSJ	sp|Q8LPZ7|CDPK3_ORYSJ	>sp|Q8LPZ7|CDPK3_ORYSJ Calcium-dependent protein kinase 3 OS=Oryza sativa subsp. japonica OX=39947 GN=CPK3 PE=2 SV=1	0.783078	0.0264824	41.248	1	S	RKASRHYSRGRFNSLSMKLIKDGSVKLVNE_	X;X;X;X;X;X;X;X;X;X;X;X;X;X;X;Phospho (STY);X;X;X;X;X;X;X;X;X;X;X;X;X;X;X	XXXXXXXXXXXPPPPPPPXXXXXXXXXXXXX	FNS(0.217)LS(0.783)MK	5	2	-0.15253			5661;5662;5663	5661	59378	56846	54922	48551	49682	52757	57291	58035	57107
sp|Q8RZQ8|SWT1A_ORYSJ	264	sp|Q8RZQ8|SWT1A_ORYSJ	sp|Q8RZQ8|SWT1A_ORYSJ	>sp|Q8RZQ8|SWT1A_ORYSJ Bidirectional sugar transporter SWEET1a OS=Oryza sativa subsp. japonica OX=39947 GN=SWEET1A PE=2 SV=1	0.997609	4.23e-06	47.897	1	S	NKVVADDADADADGKSADDKVASQV______	X;X;X;X;X;X;X;X;X;X;X;X;X;X;X;Phospho (STY);X;X;X;X;X;X;X;X;X;X;X;X;X;X;X	XXPPPPPPPPPPPPPPPPPPPPPPPXXXXXX	VVADDADADADGKS(0.998)ADDKVAS(0.002)QV	14	3	3.0099			19165;19166	19165	10679	10302	10921	8971.3	7629.4	8857.2	9632.8	10828	9245.8
sp|Q8S1Y9|CML1_ORYSJ	165	sp|Q8S1Y9|CML1_ORYSJ	sp|Q8S1Y9|CML1_ORYSJ	>sp|Q8S1Y9|CML1_ORYSJ Calmodulin-like protein 1 OS=Oryza sativa subsp. japonica OX=39947 GN=CML1 PE=2 SV=1	0.9572	0.0116222	35.56	1	S	KRRKRIEEKRDHDGGSRTKSAGPSAAPASKR	X;X;X;X;X;X;X;X;X;X;X;X;X;X;X;Phospho (STY);X;X;X;X;X;X;X;X;X;X;X;X;X;X;X	XXXXXXXXXXPPPPPPPPPXXXXXXXXXXXX	DHDGGS(0.957)RT(0.043)K	6	3	0.046992			2902	2902	2217.1	2017.7	2240.2	3304.3	2653	2867.8	2451.5	2030.1	2549.6
sp|Q8VXB5|HAK8_ORYSJ	712	sp|Q8VXB5|HAK8_ORYSJ	sp|Q8VXB5|HAK8_ORYSJ	>sp|Q8VXB5|HAK8_ORYSJ Putative potassium transporter 8 OS=Oryza sativa subsp. japonica OX=39947 GN=HAK8 PE=3 SV=2	0.998855	6.13e-09	75.832	1	S	GRAKQVRFFIDSHVASPEAADNKQVAEELEA	X;X;X;X;X;X;X;X;X;X;X;X;X;X;X;Phospho (STY);X;X;X;X;X;X;X;X;X;X;X;X;X;X;X	XXXXXXXPPPPPPPPPPPPPPPPXXXXXXXX	FFIDS(0.001)HVAS(0.999)PEAADNK	9	3	-2.6542			5465	5465	4594.8	3918.4	3701.5	3341.1	3406.4	3321.4	6618.4	5319.6	4668.4
tr|Q10SI0|Q10SI0_ORYSJ;tr|B9FC47|B9FC47_ORYSJ;tr|Q10SI2|Q10SI2_ORYSJ;sp|Q8W2X5|FL3H2_ORYSJ;tr|Q7XUN0|Q7XUN0_ORYSJ	111;113;111;117;122	tr|Q10SI0|Q10SI0_ORYSJ	tr|Q10SI0|Q10SI0_ORYSJ	>tr|Q10SI0|Q10SI0_ORYSJ Os03g0122300 protein OS=Oryza sativa subsp. japonica OX=39947 GN=LOC_Os03g03034 PE=2 SV=1;>tr|B9FC47|B9FC47_ORYSJ Os04g0581000 protein OS=Oryza sativa subsp. japonica OX=39947 GN=Os04g0581000 PE=3 SV=1;>tr|Q10SI2|Q10SI2_ORYSJ Os03g0	0.974028	0.00330743	66.382	1	S	KLYSDDPAKKIRLSTSFNVRKETVHNWRDYL	X;X;X;X;X;X;X;X;X;X;X;X;X;X;X;Phospho (STY);X;X;X;X;X;X;X;X;X;X;X;X;X;X;X	XXXXXXXXXXXXPPPPPPPPXXXXXXXXXXX	LS(0.001)T(0.025)S(0.974)FNVR	4	2	0.23876			11031;11032;11033	11032	30622	30261	28321	28426	30703	31667	46576	46936	48302
sp|Q8W3D0|PDX12_ORYSJ	22	sp|Q8W3D0|PDX12_ORYSJ	sp|Q8W3D0|PDX12_ORYSJ	>sp|Q8W3D0|PDX12_ORYSJ Probable pyridoxal 5'-phosphate synthase subunit PDX1.2 OS=Oryza sativa subsp. japonica OX=39947 GN=PDX12 PE=2 SV=1	0.943883	0.0142705	52.095	1	S	DVVALYGGANGLSHKSGSFSVKVGLAQMLRG	X;X;X;X;X;X;X;X;X;X;X;X;X;X;X;Phospho (STY);X;X;X;X;X;X;X;X;X;X;X;X;X;X;X	XXXXXXXXXXXXXXXPPPPPPPXXXXXXXXX	S(0.944)GS(0.032)FS(0.024)VK	1	2	-0.19362			14719	14719	9724.2	10707	9601.9	11458	11184	11912	14443	14103	15396
sp|Q8W3D0|PDX12_ORYSJ	24	sp|Q8W3D0|PDX12_ORYSJ	sp|Q8W3D0|PDX12_ORYSJ	>sp|Q8W3D0|PDX12_ORYSJ Probable pyridoxal 5'-phosphate synthase subunit PDX1.2 OS=Oryza sativa subsp. japonica OX=39947 GN=PDX12 PE=2 SV=1	0.884818	0.00978066	68.843	1	S	VALYGGANGLSHKSGSFSVKVGLAQMLRGGV	X;X;X;X;X;X;X;X;X;X;X;X;X;X;X;Phospho (STY);X;X;X;X;X;X;X;X;X;X;X;X;X;X;X	XXXXXXXXXXXXXPPPPPPPXXXXXXXXXXX	S(0.111)GS(0.885)FS(0.004)VK	3	3	0.054783			14715;14716;14718;14722	14716	39394	37747	38036	39878	39902	43755	59394	62399	62869
sp|Q8W3D0|PDX12_ORYSJ	26	sp|Q8W3D0|PDX12_ORYSJ	sp|Q8W3D0|PDX12_ORYSJ	>sp|Q8W3D0|PDX12_ORYSJ Probable pyridoxal 5'-phosphate synthase subunit PDX1.2 OS=Oryza sativa subsp. japonica OX=39947 GN=PDX12 PE=2 SV=1	0.499054	0.00978066	68.843		S	LYGGANGLSHKSGSFSVKVGLAQMLRGGVIM	X;X;X;X;X;X;X;X;X;X;X;X;X;X;X;X;X;X;X;X;X;X;X;X;X;X;X;X;X;X;X	XXXXXXXXXXXXXXXXXXXXXXXXXXXXXXX	S(0.002)GS(0.499)FS(0.499)VK	5	2	-0.25088				14717	0	0	0	0	0	0	0	0	0
sp|Q941Z0|NQR1_ORYSJ	88	sp|Q941Z0|NQR1_ORYSJ	sp|Q941Z0|NQR1_ORYSJ	>sp|Q941Z0|NQR1_ORYSJ Probable NADPH:quinone oxidoreductase 1 OS=Oryza sativa subsp. japonica OX=39947 GN=Os01g0953600 PE=2 SV=1	0.476503	0.000451006	39.978		S	AFRDKVRQADCFLFGSPEYNYSIATPLKNAL	X;X;X;X;X;X;X;X;X;X;X;X;X;X;X;Phospho (STY);X;X;X;X;X;X;X;X;X;X;X;X;X;X;X	XXXXXXXPPPPPPPPPPPPPPPPPPPPPXXX	QADCFLFGS(0.477)PEY(0.371)NY(0.112)S(0.039)IAT(0.002)PLK	9	3	1.3036				12780	0	0	0	0	0	0	0	0	0
sp|Q943K1|PSBS1_ORYSJ	180	sp|Q943K1|PSBS1_ORYSJ	sp|Q943K1|PSBS1_ORYSJ	>sp|Q943K1|PSBS1_ORYSJ Photosystem II 22 kDa protein 1, chloroplastic OS=Oryza sativa subsp. japonica OX=39947 GN=PSBS1 PE=1 SV=1	0.999743	2.52e-13	135.4	1	S	TGLDKAVIAPGKGFRSALGLSEGGPLFGFTK	Phospho (STY);X;X;X;X;X;X;X;X;X;X;X;X;X;X;Phospho (STY);X;X;X;X;X;X;X;X;X;X;X;X;X;X;X	XXXXXXXXXXXXXXXPPPPPPPPPPPPPPPP	S(1)ALGLSEGGPLFGFTK	1	3	1.8184			14071;14072;14073;14075;14076;14078;14079	14072	10391	10670	9273.6	12378	11908	12337	10441	10934	10541
sp|Q943K1|PSBS1_ORYSJ	185	sp|Q943K1|PSBS1_ORYSJ	sp|Q943K1|PSBS1_ORYSJ	>sp|Q943K1|PSBS1_ORYSJ Photosystem II 22 kDa protein 1, chloroplastic OS=Oryza sativa subsp. japonica OX=39947 GN=PSBS1 PE=1 SV=1	0.996624	6.76e-05	48.941	1	S	AVIAPGKGFRSALGLSEGGPLFGFTKANELF	X;X;X;X;X;X;X;X;X;X;X;X;X;X;X;Phospho (STY);X;X;X;X;X;X;X;X;X;X;X;X;X;X;X	XXXXXXXXXXPPPPPPPPPPPPPPPPXXXXX	S(0.003)ALGLS(0.997)EGGPLFGFTK	6	3	0.24765			14074;14077	14077	1946.2	1905.1	1583.8	2028.6	2028.9	2198.5	1954.5	2024.2	2166.5
sp|Q94DH3|PCL1_ORYSJ	77	sp|Q94DH3|PCL1_ORYSJ	sp|Q94DH3|PCL1_ORYSJ	>sp|Q94DH3|PCL1_ORYSJ Transcription factor PCL1 OS=Oryza sativa subsp. japonica OX=39947 GN=PCL1 PE=2 SV=1	0.683518	1.34e-07	70.198	1	S	HRASAATVSRLRRASSSSSSSFPAFASKGAG	X;X;X;X;X;X;X;X;X;X;X;X;X;X;X;Phospho (STY);X;X;X;X;X;X;X;X;X;X;X;X;X;X;X	XXXXXXXXXXXXXPPPPPPPPPPPPPPPXXX	AS(0.143)S(0.684)S(0.143)S(0.031)SSSFPAFASK	3	3	-0.49373			1916;1917;1918	1917	11744	12562	12328	35601	36964	38511	11944	11621	10641
sp|Q9AS33|NPL4_ORYSJ	103	sp|Q9AS33|NPL4_ORYSJ	sp|Q9AS33|NPL4_ORYSJ	>sp|Q9AS33|NPL4_ORYSJ NPL4-like protein OS=Oryza sativa subsp. japonica OX=39947 GN=Os01g0377700 PE=2 SV=1	0.999968	0.00015067	63.794	1	S	RSSQPPPPKALSAAGSFGKKMTMDDLIARQI	X;X;X;X;X;X;X;X;X;X;X;X;X;X;X;Phospho (STY);X;X;X;X;X;X;X;X;X;X;X;X;X;X;X	XXXXXXXXXPPPPPPPPPPXXXXXXXXXXXX	ALSAAGS(1)FGK	7	3	-1.8471			1215;1216;1217;1218;1219	1219	43846	37272	42602	38118	40622	39726	55806	51445	51087
sp|Q9AY76|ADF2_ORYSJ	8	sp|Q9AY76|ADF2_ORYSJ	sp|Q9AY76|ADF2_ORYSJ	>sp|Q9AY76|ADF2_ORYSJ Actin-depolymerizing factor 2 OS=Oryza sativa subsp. japonica OX=39947 GN=ADF2 PE=2 SV=1	0.901307	3.6e-13	129.98	1	S	________MAFMRSHSNASSGMGVAPDIRDT	X;X;X;X;X;X;X;X;X;X;X;X;X;X;X;Phospho (STY);X;X;X;X;X;X;X;X;X;X;X;X;X;X;X	XXXXXXXXXXXXXPPPPPPPPPPPPPPPPXX	SHS(0.901)NAS(0.084)S(0.014)GMGVAPDIR	3	2	-0.12047			14904;14905	14904	11280	14156	11774	8027	7939	8573.4	11207	11231	10628
sp|Q9FP13|SERL2_ORYSJ	621	sp|Q9FP13|SERL2_ORYSJ	sp|Q9FP13|SERL2_ORYSJ	>sp|Q9FP13|SERL2_ORYSJ LRR receptor kinase SERL2 OS=Oryza sativa subsp. japonica OX=39947 GN=SERL2 PE=1 SV=1	0.900199	0.00152194	36.229	1	S	APPAADFAAAFGRCFSDLTDDSSLLVQAVEL	X;X;X;X;X;X;X;X;X;X;X;X;X;X;X;Phospho (STY);X;X;X;X;X;X;X;X;X;X;X;X;X;X;X	XXXXXXXXXXXXXPPPPPPPPPPPPPPPPPP	CFS(0.9)DLT(0.033)DDS(0.033)S(0.033)LLVQAVELSGPR	3	3	0.087682			2463	2463	0	241.52	130.67	235.07	270.99	207.43	140.63	160.08	179.27
tr|A0A0P0W1S3|A0A0P0W1S3_ORYSJ;sp|Q9LST6|PSB2_ORYSJ	28;198	tr|A0A0P0W1S3|A0A0P0W1S3_ORYSJ	tr|A0A0P0W1S3|A0A0P0W1S3_ORYSJ	>tr|A0A0P0W1S3|A0A0P0W1S3_ORYSJ Os03g0695600 protein (Fragment) OS=Oryza sativa subsp. japonica OX=39947 GN=Os03g0695600 PE=4 SV=1;>sp|Q9LST6|PSB2_ORYSJ Proteasome subunit beta type-2 OS=Oryza sativa subsp. japonica OX=39947 GN=PBD1 PE=2 SV=2	0.995656	2.1e-25	121.05	1	S	DKEGAREYARRAYTDSPPEAATSEAATVAA_	X;X;X;X;X;X;X;X;X;X;X;X;X;X;X;Phospho (STY);X;X;X;X;X;X;X;X;X;X;X;X;X;X;X	XXXXXXXXXXPPPPPPPPPPPPPPPPPPPPX	RAYT(0.004)DS(0.996)PPEAATSEAATVAA	6	2	-0.053303			2421;2422;2423;2424;2425;2426;13385;13386;13387;13388;13389;13390	13390	31981	32761	29716	34694	31898	33224	34151	34254	35438
sp|Q9ST27|PHOT2_ORYSJ;tr|A0A0P0W8S4|A0A0P0W8S4_ORYSJ	269;133	sp|Q9ST27|PHOT2_ORYSJ	sp|Q9ST27|PHOT2_ORYSJ	>sp|Q9ST27|PHOT2_ORYSJ Phototropin-2 OS=Oryza sativa subsp. japonica OX=39947 GN=PHOT2 PE=1 SV=1;>tr|A0A0P0W8S4|A0A0P0W8S4_ORYSJ Os04g0304200 protein (Fragment) OS=Oryza sativa subsp. japonica OX=39947 GN=Os04g0304200 PE=4 SV=1	1	1.25e-18	156.1	1;2	S	ARAPADAALLTPPKMSDADKMAAMSPVVAPG	X;X;X;X;X;X;X;X;X;X;Phospho (STY);X;X;X;X;Phospho (STY);X;X;X;X;Oxidation (M);X;X;X;Phospho (STY);X;X;X;X;X;X	XXPPPPPPPPPPPPPPPPPPXXXXXXXXXXX	APADAALLT(1)PPKMS(1)DADK	14	3	-0.40715			1421;1424;1425;1426;1427;1428;1429;1430;1431;1432;1433;1434;1435;1436;1437;1438;1439	1438	133680	130920	129840	161860	160860	171670	132520	132440	132370
sp|Q9ST27|PHOT2_ORYSJ	85	sp|Q9ST27|PHOT2_ORYSJ	sp|Q9ST27|PHOT2_ORYSJ	>sp|Q9ST27|PHOT2_ORYSJ Phototropin-2 OS=Oryza sativa subsp. japonica OX=39947 GN=PHOT2 PE=1 SV=1	0.834764	0.00059225	42.538	2	S	GKSSVDGGVGRASHDSLPRVSQELKDALSSL	X;X;X;X;X;X;X;X;X;X;X;X;X;X;X;Phospho (STY);X;X;X;X;Phospho (STY);X;X;X;X;X;X;X;X;X;X	XXXXXXXXXXXPPPPPPPPPPPPPPXXXXXX	AS(0.165)HDS(0.835)LPRVS(1)QELK	5	3	-1.3832			1794	1794	12294	11185	12111	11382	11536	11087	13654	15087	13538
sp|Q9ST27|PHOT2_ORYSJ	90	sp|Q9ST27|PHOT2_ORYSJ	sp|Q9ST27|PHOT2_ORYSJ	>sp|Q9ST27|PHOT2_ORYSJ Phototropin-2 OS=Oryza sativa subsp. japonica OX=39947 GN=PHOT2 PE=1 SV=1	0.999815	0.00059225	42.538	2	S	DGGVGRASHDSLPRVSQELKDALSSLQQTFV	X;X;X;X;X;X;X;X;X;X;Phospho (STY);X;X;X;X;Phospho (STY);X;X;X;X;X;X;X;X;X;X;X;X;X;X;X	XXXXXXPPPPPPPPPPPPPPXXXXXXXXXXX	AS(0.165)HDS(0.835)LPRVS(1)QELK	10	3	-1.3832			1794	1794	12294	11185	12111	11382	11536	11087	13654	15087	13538
sp|Q9ST27|PHOT2_ORYSJ	69	sp|Q9ST27|PHOT2_ORYSJ	sp|Q9ST27|PHOT2_ORYSJ	>sp|Q9ST27|PHOT2_ORYSJ Phototropin-2 OS=Oryza sativa subsp. japonica OX=39947 GN=PHOT2 PE=1 SV=1	0.995488	0.00137291	72.467	1	S	PVAPATAGRDSGGTGSGKSSVDGGVGRASHD	X;X;X;X;X;X;X;X;X;X;X;X;X;X;X;Phospho (STY);X;X;X;X;X;X;X;X;X;X;X;X;X;X;X	XXXXXXXXXPPPPPPPPPXXXXXXXXXXXXX	DSGGT(0.005)GS(0.995)GK	7	2	0.4551			3359;3360;3361	3359	30754	31527	30567	14613	15223	13942	43922	45331	43463
sp|Q9ST27|PHOT2_ORYSJ;tr|A0A0P0W8S4|A0A0P0W8S4_ORYSJ	503;367	sp|Q9ST27|PHOT2_ORYSJ	sp|Q9ST27|PHOT2_ORYSJ	>sp|Q9ST27|PHOT2_ORYSJ Phototropin-2 OS=Oryza sativa subsp. japonica OX=39947 GN=PHOT2 PE=1 SV=1;>tr|A0A0P0W8S4|A0A0P0W8S4_ORYSJ Os04g0304200 protein (Fragment) OS=Oryza sativa subsp. japonica OX=39947 GN=Os04g0304200 PE=4 SV=1	0.999981	2.63e-18	217.83	1	S	QLDGSDHVEPLRNRLSENTEIQSAKLVKATA	X;X;X;X;X;X;X;X;X;X;X;X;X;X;X;Phospho (STY);X;X;X;X;X;X;X;X;X;X;X;X;X;X;X	XXXXXXXXXXXXPPPPPPPPPPPPPXXXXXX	NRLS(1)ENTEIQSAK	4	2	-0.45045			10869;12456;12457;12458;12459;12460;12461;12462;12463;12464	12459	119400	114600	115310	71668	71390	67946	131230	133090	135890
sp|Q9ST27|PHOT2_ORYSJ;tr|A0A0P0W8S4|A0A0P0W8S4_ORYSJ	278;142	sp|Q9ST27|PHOT2_ORYSJ	sp|Q9ST27|PHOT2_ORYSJ	>sp|Q9ST27|PHOT2_ORYSJ Phototropin-2 OS=Oryza sativa subsp. japonica OX=39947 GN=PHOT2 PE=1 SV=1;>tr|A0A0P0W8S4|A0A0P0W8S4_ORYSJ Os04g0304200 protein (Fragment) OS=Oryza sativa subsp. japonica OX=39947 GN=Os04g0304200 PE=4 SV=1	1	2.55e-33	132.13	1;2;3	S	LTPPKMSDADKMAAMSPVVAPGTPSGGGGGA	X;Phospho (STY);X;X;X;X;Phospho (STY);X;X;X;X;Oxidation (M);X;X;X;Phospho (STY);X;X;X;X;X;X;Phospho (STY);X;X;X;X;X;X;X;X	XXXXXXXXXXXPPPPPPPPPPPPPPPPPPPP	MAAMS(1)PVVAPGT(0.979)PS(0.021)GGGGGAGSFK	5	3	-1.6043			11363;11365;11366;11369;11370;11371;11372;11373;11374;11375;11376;11377;11379;11380;11381;11382;11385;11386;11387;11388;11390;11391;11392;11393;11394;11395;11396;11397;11398;11399;11400;11401;11402;11404;11405;11406;11407;11408;11409;11411;11412;11413;11414;11415;11416;11417;11418	11377	79764	77798	73051	89648	88661	92562	73966	76840	72291
sp|Q9ST27|PHOT2_ORYSJ;tr|A0A0P0W8S4|A0A0P0W8S4_ORYSJ	287;151	sp|Q9ST27|PHOT2_ORYSJ	sp|Q9ST27|PHOT2_ORYSJ	>sp|Q9ST27|PHOT2_ORYSJ Phototropin-2 OS=Oryza sativa subsp. japonica OX=39947 GN=PHOT2 PE=1 SV=1;>tr|A0A0P0W8S4|A0A0P0W8S4_ORYSJ Os04g0304200 protein (Fragment) OS=Oryza sativa subsp. japonica OX=39947 GN=Os04g0304200 PE=4 SV=1	0.538173	0.000124492	38.387	3	S	DKMAAMSPVVAPGTPSGGGGGAGSFKSPLWD	X;X;X;X;X;X;X;X;X;X;X;X;X;Phospho (STY);X;Phospho (STY);X;X;X;X;X;X;X;Phospho (STY);X;X;X;X;X;X;X	XXPPPPPPPPPPPPPPPPPPPPPPPPPPPPP	MAAMS(0.424)PVVAPGT(0.839)PS(0.538)GGGGGAGS(0.644)FKS(0.555)PLWDLK	14	4	-0.91254			11410	11410	452.2	335.59	291.81	313.41	389.03	403.28	795.66	864.95	811.24
sp|Q9ST27|PHOT2_ORYSJ;tr|A0A0P0W8S4|A0A0P0W8S4_ORYSJ	295;159	sp|Q9ST27|PHOT2_ORYSJ	sp|Q9ST27|PHOT2_ORYSJ	>sp|Q9ST27|PHOT2_ORYSJ Phototropin-2 OS=Oryza sativa subsp. japonica OX=39947 GN=PHOT2 PE=1 SV=1;>tr|A0A0P0W8S4|A0A0P0W8S4_ORYSJ Os04g0304200 protein (Fragment) OS=Oryza sativa subsp. japonica OX=39947 GN=Os04g0304200 PE=4 SV=1	0.999786	8.88e-21	93.54	1;2;3	S	VVAPGTPSGGGGGAGSFKSPLWDLKKEESRL	X;X;X;X;X;Phospho (STY);X;Phospho (STY);X;X;X;X;X;X;X;Phospho (STY);X;X;X;X;X;X;X;X;X;X;X;X;X;X;X	PPPPPPPPPPPPPPPPPPPPPPPPPPXXXXX	MAAMSPVVAPGT(0.981)PS(0.019)GGGGGAGS(1)FK	22	4	-0.39667			11364;11367;11368;11374;11375;11378;11379;11380;11383;11384;11385;11386;11389;11390;11391;11392;11393;11394;11395;11396;11397;11398;11403;11407;11408;11410;11412;11416;11418	11378	30776	28951	26795	22596	23609	23935	42345	41331	42962
sp|Q9ST27|PHOT2_ORYSJ;tr|A0A0P0W8S4|A0A0P0W8S4_ORYSJ	298;162	sp|Q9ST27|PHOT2_ORYSJ	sp|Q9ST27|PHOT2_ORYSJ	>sp|Q9ST27|PHOT2_ORYSJ Phototropin-2 OS=Oryza sativa subsp. japonica OX=39947 GN=PHOT2 PE=1 SV=1;>tr|A0A0P0W8S4|A0A0P0W8S4_ORYSJ Os04g0304200 protein (Fragment) OS=Oryza sativa subsp. japonica OX=39947 GN=Os04g0304200 PE=4 SV=1	0.952187	3.52e-23	100.97	2;3	S	PGTPSGGGGGAGSFKSPLWDLKKEESRLSRL	X;X;Phospho (STY);X;X;X;X;X;X;X;X;X;Phospho (STY);X;X;Phospho (STY);X;X;X;X;X;X;X;X;X;X;X;X;X;X;X	PPPPPPPPPPPPPPPPPPPPPPXXXXXXXXX	MAAMS(0.993)PVVAPGT(0.006)PS(0.002)GGGGGAGS(0.047)FKS(0.952)PLWDLK	25	5	-0.17775			11399;11400;11401;11402;11404;11405;11406;11409;11410;11411;11413;11414;11415	11400	13206	13416	13221	21431	21290	21463	11974	12369	10989
sp|W0RYD3|SSG4_ORYSJ	236	sp|W0RYD3|SSG4_ORYSJ	sp|W0RYD3|SSG4_ORYSJ	>sp|W0RYD3|SSG4_ORYSJ Protein SUBSTANDARD STARCH GRAIN 4, chloroplastic OS=Oryza sativa subsp. japonica OX=39947 GN=SSG4 PE=1 SV=1	0.919895	1.31e-06	55.168	1	S	RKDFSWLGLPAPSEGSPKRHSGEEGIDYRTK	X;X;X;X;X;X;X;X;X;X;X;X;X;X;X;Phospho (STY);X;X;X;X;X;X;X;X;X;X;X;X;X;X;X	XXPPPPPPPPPPPPPPPPXXXXXXXXXXXXX	DFSWLGLPAPS(0.08)EGS(0.92)PK	14	3	2.5343			2759	2759	599.17	537.24	421.35	689.1	451.81	523.75	410.49	398.37	744.77
tr|A0A0N7KD63|A0A0N7KD63_ORYSJ;tr|A0A0P0V4A4|A0A0P0V4A4_ORYSJ;tr|Q657L8|Q657L8_ORYSJ	149;249;569	tr|A0A0N7KD63|A0A0N7KD63_ORYSJ	tr|A0A0N7KD63|A0A0N7KD63_ORYSJ	>tr|A0A0N7KD63|A0A0N7KD63_ORYSJ Os01g0563000 protein (Fragment) OS=Oryza sativa subsp. japonica OX=39947 GN=Os01g0563000 PE=4 SV=1;>tr|A0A0P0V4A4|A0A0P0V4A4_ORYSJ Peptidylprolyl isomerase (Fragment) OS=Oryza sativa subsp. japonica OX=39947 GN=Os01g0563000	0.999949	2.64e-50	196.6	1	S	ESELQLNATFTPAAFSPRRKGEHPYRGEIIG	X;X;X;X;X;X;X;X;X;X;X;X;X;X;X;Phospho (STY);X;X;X;X;X;X;X;X;X;X;X;X;X;X;X	PPPPPPPPPPPPPPPPPPXXXXXXXXXXXXX	GFEQFPPEYESELQLNATFTPAAFS(1)PR	25	3	0.081308			6239;6240;6241;6242;6243;6244;6245;6246;6247;6248;6249;6250;6251;6252;6253	6252	15709	15813	14119	13885	14603	15550	22380	22906	24795
tr|A0A0N7KD71|A0A0N7KD71_ORYSJ	84	tr|A0A0N7KD71|A0A0N7KD71_ORYSJ	tr|A0A0N7KD71|A0A0N7KD71_ORYSJ	>tr|A0A0N7KD71|A0A0N7KD71_ORYSJ Os01g0572300 protein OS=Oryza sativa subsp. japonica OX=39947 GN=Os01g0572300 PE=4 SV=1	0.985127	7.98e-15	83.882	1	S	SLPGNPDPEAEVVALSPATLMATNRFVCEIC	X;X;X;X;X;X;X;X;X;X;X;X;X;X;X;Phospho (STY);X;X;X;X;X;X;X;X;X;X;X;X;X;X;X	PPPPPPPPPPPPPPPPPPPPPPPPPXXXXXX	SLPGNPDPEAEVVALS(0.985)PAT(0.015)LMATNR	16	3	0.65746			15188;15189;15190	15188	3272.2	3299.1	3364.3	2909.1	3599.6	3575.4	3070.5	3306.4	3964.2
tr|A0A0N7KDZ0|A0A0N7KDZ0_ORYSJ;tr|A0A0N7KP26|A0A0N7KP26_ORYSJ;tr|Q7XHW7|Q7XHW7_ORYSJ;tr|Q0JPG8|Q0JPG8_ORYSJ;tr|A0A0P0W2S4|A0A0P0W2S4_ORYSJ;tr|A0A0P0X811|A0A0P0X811_ORYSJ;tr|Q10LW3|Q10LW3_ORYSJ;tr|Q75GM0|Q75GM0_ORYSJ;tr|Q6MWE1|Q6MWE1_ORYSJ;tr|Q8H811|Q8H811_ORYSJ	67;71;346;192;85;326;340;345;367;386	tr|A0A0N7KDZ0|A0A0N7KDZ0_ORYSJ;tr|A0A0N7KP26|A0A0N7KP26_ORYSJ;tr|Q0JPG8|Q0JPG8_ORYSJ		>tr|A0A0N7KDZ0|A0A0N7KDZ0_ORYSJ Os01g0819100 protein (Fragment) OS=Oryza sativa subsp. japonica OX=39947 GN=Os01g0819100 PE=4 SV=1;>tr|A0A0N7KP26|A0A0N7KP26_ORYSJ Os07g0681100 protein OS=Oryza sativa subsp. japonica OX=39947 GN=Os07g0681100 PE=4 SV=1;>tr|Q	1	0.00804507	39.122	1	S	EGCSYNFDLEDLLRASAEVLGKGSYGTTYKA;EGCSYTFDLEDLLRASAEVLGKGSYGTAYKA;EGPALAFDLEDLLRASAEVLGKGAFGTAYRA	X;X;X;X;X;X;X;X;X;X;X;X;X;X;X;Phospho (STY);X;X;X;X;X;X;X;X;X;X;X;X;X;X;X	XXXXXXXXXXXXXXPPPPPPPPXXXXXXXXX	AS(1)AEVLGK	2	2	-0.31592			1692	1692	15726	14895	15201	16839	16595	16725	17927	18226	17411
tr|A0A0N7KEK0|A0A0N7KEK0_ORYSJ	491	tr|A0A0N7KEK0|A0A0N7KEK0_ORYSJ	tr|A0A0N7KEK0|A0A0N7KEK0_ORYSJ	>tr|A0A0N7KEK0|A0A0N7KEK0_ORYSJ Os02g0114000 protein (Fragment) OS=Oryza sativa subsp. japonica OX=39947 GN=Os02g0114000 PE=4 SV=1	0.812503	0.00597766	32.492	1	S	PTDMFIVKKKRDRRPSLGSPSSSGRTGPLSP	X;X;X;X;X;X;X;X;X;X;X;X;X;X;X;Phospho (STY);X;X;X;X;X;X;X;X;X;X;X;X;X;Phospho (STY);X	XXXXXXXXXXXPPPPPPPPPPPPPPXXXXXX	DRRPS(0.813)LGS(0.182)PS(0.003)S(0.002)S(0.001)GR	5	3	-0.39742			3332	3332	7440.8	7490	7206.1	7171.1	7573.4	7649.8	7179.1	7041.7	7781.7
tr|A0A0N7KEK0|A0A0N7KEK0_ORYSJ	555	tr|A0A0N7KEK0|A0A0N7KEK0_ORYSJ	tr|A0A0N7KEK0|A0A0N7KEK0_ORYSJ	>tr|A0A0N7KEK0|A0A0N7KEK0_ORYSJ Os02g0114000 protein (Fragment) OS=Oryza sativa subsp. japonica OX=39947 GN=Os02g0114000 PE=4 SV=1	0.484534	1.52e-10	69		S	GWGAHSVQQSDRGGSSSPGIGDIQWAKPTKR	X;X;X;X;X;X;X;X;X;X;X;X;X;X;X;Phospho (STY);X;X;X;X;X;X;X;X;X;X;X;X;X;X;X	XXXXXXXXXXXXPPPPPPPPPPPPPPPPPPX	GGS(0.104)S(0.485)S(0.411)PGIGDIQWAKPTK	4	3	0.52334				6541	0	0	0	0	0	0	0	0	0
tr|A0A0N7KEK0|A0A0N7KEK0_ORYSJ	505	tr|A0A0N7KEK0|A0A0N7KEK0_ORYSJ	tr|A0A0N7KEK0|A0A0N7KEK0_ORYSJ	>tr|A0A0N7KEK0|A0A0N7KEK0_ORYSJ Os02g0114000 protein (Fragment) OS=Oryza sativa subsp. japonica OX=39947 GN=Os02g0114000 PE=4 SV=1	0.839186	0.00107326	46.307	1	S	PSLGSPSSSGRTGPLSPTNAGRMGPAPSPRG	X;Phospho (STY);X;X;X;X;X;X;X;X;X;X;X;X;X;Phospho (STY);X;X;X;X;X;X;X;X;X;X;X;X;X;X;X	XXXXXXXXXXXPPPPPPPPPPPXXXXXXXXX	T(0.082)GPLS(0.839)PT(0.079)NAGR	5	2	-3.5793			16828;16829	16829	26375	34032	26446	32057	26468	27707	26334	25165	24899
tr|A0A0N7KFE2|A0A0N7KFE2_ORYSJ;tr|Q6H547|Q6H547_ORYSJ	382;970	tr|A0A0N7KFE2|A0A0N7KFE2_ORYSJ	tr|A0A0N7KFE2|A0A0N7KFE2_ORYSJ	>tr|A0A0N7KFE2|A0A0N7KFE2_ORYSJ Os02g0523500 protein (Fragment) OS=Oryza sativa subsp. japonica OX=39947 GN=Os02g0523500 PE=4 SV=1;>tr|Q6H547|Q6H547_ORYSJ Ribonuclease OS=Oryza sativa subsp. japonica OX=39947 GN=Os02g0523500 PE=2 SV=1	1	8.12e-29	199.33	1	S	AKKERLQIWQYGDVESDEEEQAPAARRTGGR	X;X;X;X;X;X;X;X;X;X;X;X;X;X;X;Phospho (STY);X;X;X;X;X;X;X;X;X;X;X;X;X;X;X	XXXXXPPPPPPPPPPPPPPPPPPPPPXXXXX	LQIWQYGDVES(1)DEEEQAPAAR	11	3	0.052843			10769;10770;10771;10772;10773;10774;10775	10769	9816.7	9506.4	9488.5	9716.1	8086.4	8941.7	10172	9857.3	10482
tr|A0A0N7KFQ9|A0A0N7KFQ9_ORYSJ	72	tr|A0A0N7KFQ9|A0A0N7KFQ9_ORYSJ	tr|A0A0N7KFQ9|A0A0N7KFQ9_ORYSJ	>tr|A0A0N7KFQ9|A0A0N7KFQ9_ORYSJ Os02g0631500 protein OS=Oryza sativa subsp. japonica OX=39947 GN=Os02g0631500 PE=4 SV=1	0.958444	9.12e-13	86.513	1	S	SERAASVEKPENEKLSDSESQKVQPHDTAFS	X;X;X;X;X;X;X;X;X;X;X;X;X;X;X;Phospho (STY);X;X;X;X;X;X;X;X;X;X;X;X;X;X;X	XXXPPPPPPPPPPPPPPPPPPPXXXXXXXXX	AASVEKPENEKLS(0.958)DS(0.038)ES(0.003)QK	13	4	-0.56778			316	316	9111.5	8536.5	8589.3	9484.6	9483.3	9719.4	11880	12629	12769
tr|A0A0N7KG12|A0A0N7KG12_ORYSJ	328	tr|A0A0N7KG12|A0A0N7KG12_ORYSJ	tr|A0A0N7KG12|A0A0N7KG12_ORYSJ	>tr|A0A0N7KG12|A0A0N7KG12_ORYSJ Os02g0729400 protein (Fragment) OS=Oryza sativa subsp. japonica OX=39947 GN=Os02g0729400 PE=4 SV=1	1	0.00450136	87.34	1	S	SSASRTTTSRKLLPGSVDG____________	Phospho (STY);Phospho (STY);X;Phospho (STY);X;Phospho (STY);Phospho (STY);X;X;X;X;X;X;X;X;Phospho (STY);X;X;X;X;X;X;X;X;X;X;X;X;X;X;X	XXXXXXXXXXPPPPPPPPPXXXXXXXXXXXX	LLPGS(1)VDG	5	2	-0.030084			9232;9233;9234;9235;10513;10514;10515	10515	141320	134420	131830	147390	145250	154830	150910	153490	145480
tr|A0A0N7KG12|A0A0N7KG12_ORYSJ	312	tr|A0A0N7KG12|A0A0N7KG12_ORYSJ	tr|A0A0N7KG12|A0A0N7KG12_ORYSJ	>tr|A0A0N7KG12|A0A0N7KG12_ORYSJ Os02g0729400 protein (Fragment) OS=Oryza sativa subsp. japonica OX=39947 GN=Os02g0729400 PE=4 SV=1	0.62201	1.35e-12	128.87	1	S	PSRVIPAAADRLVTASSSASRTTTSRKLLPG	X;X;X;X;X;X;X;X;X;X;X;X;X;X;X;Phospho (STY);X;X;X;X;X;Phospho (STY);X;X;X;X;X;X;X;X;X	XXXXXXXXXXXPPPPPPPPPPPPPPPXXXXX	LVT(0.373)AS(0.622)S(0.005)SASR	5	2	-0.032616			11256;11257;11258	11257	22767	23640	22221	26210	23815	25064	27455	26508	25950
tr|A0A0N7KG12|A0A0N7KG12_ORYSJ	313	tr|A0A0N7KG12|A0A0N7KG12_ORYSJ	tr|A0A0N7KG12|A0A0N7KG12_ORYSJ	>tr|A0A0N7KG12|A0A0N7KG12_ORYSJ Os02g0729400 protein (Fragment) OS=Oryza sativa subsp. japonica OX=39947 GN=Os02g0729400 PE=4 SV=1	0.913206	1.08e-05	68.194	1	S	SRVIPAAADRLVTASSSASRTTTSRKLLPGS	X;X;X;X;X;X;X;X;X;X;X;X;X;X;X;Phospho (STY);X;X;X;X;X;X;X;X;X;X;X;X;X;X;Phospho (STY)	XXXXXXXXXXPPPPPPPPPPXXXXXXXXXXX	LVT(0.002)AS(0.066)S(0.913)S(0.019)ASR	6	2	-0.27404			11261	11261	15044	14720	14491	17419	15109	14052	16790	16060	18513
tr|A0A0N7KG12|A0A0N7KG12_ORYSJ	314	tr|A0A0N7KG12|A0A0N7KG12_ORYSJ	tr|A0A0N7KG12|A0A0N7KG12_ORYSJ	>tr|A0A0N7KG12|A0A0N7KG12_ORYSJ Os02g0729400 protein (Fragment) OS=Oryza sativa subsp. japonica OX=39947 GN=Os02g0729400 PE=4 SV=1	0.434132	2.45e-09	66.305		S	RVIPAAADRLVTASSSASRTTTSRKLLPGSV	X;X;X;X;X;X;X;X;X;X;X;Phospho (STY);X;X;X;Phospho (STY);X;Phospho (STY);X;X;X;X;X;X;X;X;X;X;X;Phospho (STY);X	XXXXXXXXXPPPPPPPPPPPPPPPPXXXXXX	LVT(0.001)AS(0.014)S(0.138)S(0.434)AS(0.43)RT(0.43)T(0.43)T(0.062)S(0.062)RK	7	4	1.466				11289	0	0	0	0	0	0	0	0	0
tr|A0A0N7KG12|A0A0N7KG12_ORYSJ	316	tr|A0A0N7KG12|A0A0N7KG12_ORYSJ	tr|A0A0N7KG12|A0A0N7KG12_ORYSJ	>tr|A0A0N7KG12|A0A0N7KG12_ORYSJ Os02g0729400 protein (Fragment) OS=Oryza sativa subsp. japonica OX=39947 GN=Os02g0729400 PE=4 SV=1	0.44999	1.02e-12	116.16		S	IPAAADRLVTASSSASRTTTSRKLLPGSVDG	X;X;X;X;X;X;X;X;X;Phospho (STY);X;X;X;Phospho (STY);X;Phospho (STY);X;X;X;X;X;X;X;X;X;X;X;Phospho (STY);X;X;X	XXXXXXXPPPPPPPPPPPPPPPPXXXXXXXX	LVT(0.835)AS(0.144)S(0.023)S(0.014)AS(0.45)RT(0.324)T(0.183)T(0.026)SR	9	3	-0.48485				11287	0	0	0	0	0	0	0	0	0
tr|A0A0N7KG12|A0A0N7KG12_ORYSJ	321	tr|A0A0N7KG12|A0A0N7KG12_ORYSJ	tr|A0A0N7KG12|A0A0N7KG12_ORYSJ	>tr|A0A0N7KG12|A0A0N7KG12_ORYSJ Os02g0729400 protein (Fragment) OS=Oryza sativa subsp. japonica OX=39947 GN=Os02g0729400 PE=4 SV=1	0.338993	0.000253767	38.564		S	DRLVTASSSASRTTTSRKLLPGSVDG_____	X;X;X;X;Phospho (STY);X;Phospho (STY);Phospho (STY);X;X;X;X;X;X;X;X;X;X;X;X;X;X;Phospho (STY);X;X;X;X;X;X;X;X	XXXXXXXXXXXXXXXXXXXXXXXXXXXXXXX	LVT(0.001)AS(0.01)S(0.031)S(0.156)AS(0.179)RT(0.55)T(0.396)T(0.339)S(0.339)RK	14	4	1.4795				11291	0	0	0	0	0	0	0	0	0
tr|A0A0N7KGD8|A0A0N7KGD8_ORYSJ;tr|Q6K9T1|Q6K9T1_ORYSJ;tr|A0A0P0VRN6|A0A0P0VRN6_ORYSJ	253;325;89	tr|A0A0N7KGD8|A0A0N7KGD8_ORYSJ	tr|A0A0N7KGD8|A0A0N7KGD8_ORYSJ	>tr|A0A0N7KGD8|A0A0N7KGD8_ORYSJ Os02g0830100 protein OS=Oryza sativa subsp. japonica OX=39947 GN=Os02g0830100 PE=3 SV=1;>tr|Q6K9T1|Q6K9T1_ORYSJ Os02g0830100 protein OS=Oryza sativa subsp. japonica OX=39947 GN=Os02g0830100 PE=2 SV=1;>tr|A0A0P0VRN6|A0A0P0VRN	0.532251	0.000549737	42.139	1	S	RALREEVYRAYLTRASSGDLDNTNIISQILK	X;X;X;X;X;X;X;X;X;X;X;X;X;X;X;Phospho (STY);X;X;X;X;X;X;X;X;X;X;X;X;X;X;X	XXXXXXXXXXXXXXPPPPPPPPPPPPPPPPP	AS(0.532)S(0.468)GDLDNTNIISQILK	2	3	1.3795			1867	1867	1229.2	1053.6	902.42	1458.4	963.01	1182	1398.3	1109.1	1027.5
tr|A0A0N7KGD8|A0A0N7KGD8_ORYSJ;tr|Q6K9T1|Q6K9T1_ORYSJ;tr|A0A0P0VRN6|A0A0P0VRN6_ORYSJ	254;326;90	tr|A0A0N7KGD8|A0A0N7KGD8_ORYSJ	tr|A0A0N7KGD8|A0A0N7KGD8_ORYSJ	>tr|A0A0N7KGD8|A0A0N7KGD8_ORYSJ Os02g0830100 protein OS=Oryza sativa subsp. japonica OX=39947 GN=Os02g0830100 PE=3 SV=1;>tr|Q6K9T1|Q6K9T1_ORYSJ Os02g0830100 protein OS=Oryza sativa subsp. japonica OX=39947 GN=Os02g0830100 PE=2 SV=1;>tr|A0A0P0VRN6|A0A0P0VRN	0.539651	7.7e-07	58.033	1	S	ALREEVYRAYLTRASSGDLDNTNIISQILKL	X;X;X;X;X;X;X;X;X;X;X;X;X;X;X;Phospho (STY);X;X;X;X;X;X;X;X;X;X;X;X;X;X;X	XXXXXXXXXXXXXPPPPPPPPPPPPPPPPPX	AS(0.46)S(0.54)GDLDNTNIISQILK	3	3	-1.3539			1868	1868	670.76	705.58	578.25	795.22	752.89	886.88	675.93	506.89	754.05
tr|A0A0N7KGD8|A0A0N7KGD8_ORYSJ;tr|Q6K9T1|Q6K9T1_ORYSJ;tr|A0A0P0VRN6|A0A0P0VRN6_ORYSJ;tr|A0A0P0VRM6|A0A0P0VRM6_ORYSJ;tr|A0A0P0VRM4|A0A0P0VRM4_ORYSJ	682;754;518;303;118	tr|A0A0N7KGD8|A0A0N7KGD8_ORYSJ	tr|A0A0N7KGD8|A0A0N7KGD8_ORYSJ	>tr|A0A0N7KGD8|A0A0N7KGD8_ORYSJ Os02g0830100 protein OS=Oryza sativa subsp. japonica OX=39947 GN=Os02g0830100 PE=3 SV=1;>tr|Q6K9T1|Q6K9T1_ORYSJ Os02g0830100 protein OS=Oryza sativa subsp. japonica OX=39947 GN=Os02g0830100 PE=2 SV=1;>tr|A0A0P0VRN6|A0A0P0VRN	1	0.00021943	63.258	1	S	KSPLEVFVSFRGREPSPEALLRHNGLLPVAA	X;X;X;X;X;X;X;X;X;X;X;X;X;X;X;Phospho (STY);X;X;X;X;X;X;X;X;X;X;X;X;X;X;X	XXXXXXXXXXXPPPPPPPPPPPXXXXXXXXX	GREPS(1)PEALLR	5	3	-0.77018			7271;7272;7273;7274	7274	19029	18066	17322	20024	18594	19663	19003	19750	19555
tr|Q9AV77|Q9AV77_ORYSJ;tr|A0A0N7KGJ7|A0A0N7KGJ7_ORYSJ;tr|A0A0P0VRI0|A0A0P0VRI0_ORYSJ	54;62;66	tr|Q9AV77|Q9AV77_ORYSJ	tr|Q9AV77|Q9AV77_ORYSJ	>tr|Q9AV77|Q9AV77_ORYSJ 60S ribosomal protein L23, putative, expressed OS=Oryza sativa subsp. japonica OX=39947 GN=LOC_Os03g04590 PE=2 SV=1;>tr|A0A0N7KGJ7|A0A0N7KGJ7_ORYSJ Os03g0139100 protein (Fragment) OS=Oryza sativa subsp. japonica OX=39947 GN=Os03g013	0.999978	0.000411179	40.207	1	S	IISVKGIKGRLNRLPSACVGDMVMATVKKGK	X;X;X;X;X;X;X;X;X;X;X;X;X;X;X;Phospho (STY);X;X;X;X;X;X;X;X;X;X;X;X;X;X;X	XXXXXXXXXXXXXPPPPPPPPPPPPPPPXXX	LPS(1)ACVGDMVMATVK	3	3	0.36402			10752	10752	1057.1	963.29	580.3	1069.6	1275.7	1247.7	1211.7	1014.1	675.15
tr|A0A0N7KGL4|A0A0N7KGL4_ORYSJ;tr|Q10RM9|Q10RM9_ORYSJ	426;768	tr|A0A0N7KGL4|A0A0N7KGL4_ORYSJ	tr|A0A0N7KGL4|A0A0N7KGL4_ORYSJ	>tr|A0A0N7KGL4|A0A0N7KGL4_ORYSJ Os03g0152800 protein (Fragment) OS=Oryza sativa subsp. japonica OX=39947 GN=Os03g0152800 PE=4 SV=1;>tr|Q10RM9|Q10RM9_ORYSJ Expressed protein OS=Oryza sativa subsp. japonica OX=39947 GN=LOC_Os03g05812 PE=4 SV=1	0.999799	0.000799323	56.639	1	S	RSGLGKHRAGFRRMNSVLAGSPKESDNGGNR	X;X;X;X;X;X;X;X;X;X;X;X;X;X;X;Phospho (STY);X;X;X;X;X;X;X;X;X;X;X;X;X;X;X	XXXXXXXXXXXXXPPPPPPPPPPXXXXXXXX	MNS(1)VLAGSPK	3	3	-0.2364			11705;11706;11707;11708;11709;11710	11710	38681	37664	36695	30940	31497	31978	41822	41371	41490
tr|A0A0P0VVF6|A0A0P0VVF6_ORYSJ;tr|A0A0N7KGX7|A0A0N7KGX7_ORYSJ;tr|A0A0P0VVE7|A0A0P0VVE7_ORYSJ	40;69;40	tr|A0A0P0VVF6|A0A0P0VVF6_ORYSJ	tr|A0A0P0VVF6|A0A0P0VVF6_ORYSJ	>tr|A0A0P0VVF6|A0A0P0VVF6_ORYSJ Os03g0246800 protein (Fragment) OS=Oryza sativa subsp. japonica OX=39947 GN=Os03g0246800 PE=4 SV=1;>tr|A0A0N7KGX7|A0A0N7KGX7_ORYSJ Os03g0246800 protein OS=Oryza sativa subsp. japonica OX=39947 GN=Os03g0246800 PE=4 SV=1;>tr|A	0.349757	2.32e-12	60.088		S	RLQNPPPPAAAAQAPSTPTSPTTPTSSSSQP	X;X;X;X;X;X;X;X;X;X;X;X;X;X;X;Phospho (STY);X;X;X;X;X;X;X;X;X;X;X;X;X;X;X	XPPPPPPPPPPPPPPPPPPPPPPPPPPPPPP	LQNPPPPAAAAQAPS(0.35)T(0.35)PT(0.121)S(0.121)PT(0.043)T(0.015)PT(0.001)SSSSQPGPLR	15	4	0.45454				10791	0	0	0	0	0	0	0	0	0
tr|A0A0P0VVF6|A0A0P0VVF6_ORYSJ;tr|A0A0N7KGX7|A0A0N7KGX7_ORYSJ;tr|A0A0P0VVE7|A0A0P0VVE7_ORYSJ	255;284;255	tr|A0A0P0VVF6|A0A0P0VVF6_ORYSJ	tr|A0A0P0VVF6|A0A0P0VVF6_ORYSJ	>tr|A0A0P0VVF6|A0A0P0VVF6_ORYSJ Os03g0246800 protein (Fragment) OS=Oryza sativa subsp. japonica OX=39947 GN=Os03g0246800 PE=4 SV=1;>tr|A0A0N7KGX7|A0A0N7KGX7_ORYSJ Os03g0246800 protein OS=Oryza sativa subsp. japonica OX=39947 GN=Os03g0246800 PE=4 SV=1;>tr|A	0.631541	1.44e-38	233.28	1	S	IGDIDGAITPLARTTSSAAAGAGGAAAHDGA	X;X;X;X;X;X;X;X;Phospho (STY);X;X;X;X;X;X;Phospho (STY);X;X;X;X;X;X;X;X;X;X;X;X;X;X;X	XXXXXXXXXXXXXPPPPPPPPPPPPPPPPPP	T(0.123)T(0.123)S(0.632)S(0.123)AAAGAGGAAAHDGAFETR	3	3	-0.031146			17527;17528	17528	8136.9	8770.1	7722.6	6849.3	6520.4	7417.2	11793	10829	10725
tr|A0A0P0VVF6|A0A0P0VVF6_ORYSJ;tr|A0A0N7KGX7|A0A0N7KGX7_ORYSJ;tr|A0A0P0VVE7|A0A0P0VVE7_ORYSJ	256;285;256	tr|A0A0P0VVF6|A0A0P0VVF6_ORYSJ	tr|A0A0P0VVF6|A0A0P0VVF6_ORYSJ	>tr|A0A0P0VVF6|A0A0P0VVF6_ORYSJ Os03g0246800 protein (Fragment) OS=Oryza sativa subsp. japonica OX=39947 GN=Os03g0246800 PE=4 SV=1;>tr|A0A0N7KGX7|A0A0N7KGX7_ORYSJ Os03g0246800 protein OS=Oryza sativa subsp. japonica OX=39947 GN=Os03g0246800 PE=4 SV=1;>tr|A	0.402471	3.88e-28	192.19		S	GDIDGAITPLARTTSSAAAGAGGAAAHDGAF	X;X;X;X;X;X;X;Phospho (STY);X;X;X;X;X;X;X;X;X;X;X;X;X;X;X;X;X;X;X;X;X;X;X	XXXXXXXXXXXXXXXXXXXXXXXXXXXXXXX	T(0.098)T(0.098)S(0.402)S(0.402)AAAGAGGAAAHDGAFETR	4	3	0.11342				17529	0	0	0	0	0	0	0	0	0
tr|A0A0N7KH54|A0A0N7KH54_ORYSJ	279	tr|A0A0N7KH54|A0A0N7KH54_ORYSJ	tr|A0A0N7KH54|A0A0N7KH54_ORYSJ	>tr|A0A0N7KH54|A0A0N7KH54_ORYSJ Os03g0311300 protein OS=Oryza sativa subsp. japonica OX=39947 GN=Os03g0311300 PE=4 SV=1	0.710605	0.000147528	36.258	1	S	IAVMTTLEEDALQQASPSLIRKNIGDISIRD	X;X;X;X;X;X;X;X;X;X;X;X;X;X;X;Phospho (STY);X;X;X;X;X;X;X;X;X;X;X;X;X;X;X	PPPPPPPPPPPPPPPPPPPPPXXXXXXXXXX	CIAVMT(0.003)T(0.009)LEEDALQQAS(0.711)PS(0.277)LIR	17	3	-0.42165			2468	2468	452.27	469.01	418.4	441.66	451.71	455.81	390.12	437.52	412.34
tr|A0A0N7KH54|A0A0N7KH54_ORYSJ	66	tr|A0A0N7KH54|A0A0N7KH54_ORYSJ	tr|A0A0N7KH54|A0A0N7KH54_ORYSJ	>tr|A0A0N7KH54|A0A0N7KH54_ORYSJ Os03g0311300 protein OS=Oryza sativa subsp. japonica OX=39947 GN=Os03g0311300 PE=4 SV=1	0.422724	3.18e-14	77.435		S	RRGRRDVAAASAPASSSPETEVAPGAWGKVS	X;X;X;X;X;X;X;X;X;X;X;X;X;X;X;Phospho (STY);X;X;X;X;X;X;X;X;X;X;X;X;X;X;X	XXXXXPPPPPPPPPPPPPPPPPPPPPPPPXX	DVAAAS(0.001)APAS(0.052)S(0.423)S(0.423)PET(0.102)EVAPGAWGK	11	3	-0.54009				3482	0	0	0	0	0	0	0	0	0
tr|A0A0N7KH54|A0A0N7KH54_ORYSJ	67	tr|A0A0N7KH54|A0A0N7KH54_ORYSJ	tr|A0A0N7KH54|A0A0N7KH54_ORYSJ	>tr|A0A0N7KH54|A0A0N7KH54_ORYSJ Os03g0311300 protein OS=Oryza sativa subsp. japonica OX=39947 GN=Os03g0311300 PE=4 SV=1	0.422724	3.18e-14	77.435		S	RGRRDVAAASAPASSSPETEVAPGAWGKVSA	X;X;X;X;X;X;X;X;X;X;X;X;X;X;X;X;X;X;X;X;X;X;X;X;X;X;X;X;X;X;X	XXXXXXXXXXXXXXXXXXXXXXXXXXXXXXX	DVAAAS(0.001)APAS(0.052)S(0.423)S(0.423)PET(0.102)EVAPGAWGK	12	3	-0.54009				3482	0	0	0	0	0	0	0	0	0
tr|A0A0N7KHE3|A0A0N7KHE3_ORYSJ;tr|A0A0P0VYC3|A0A0P0VYC3_ORYSJ	43;381	tr|A0A0N7KHE3|A0A0N7KHE3_ORYSJ	tr|A0A0N7KHE3|A0A0N7KHE3_ORYSJ	>tr|A0A0N7KHE3|A0A0N7KHE3_ORYSJ Os03g0397700 protein OS=Oryza sativa subsp. japonica OX=39947 GN=Os03g0397700 PE=4 SV=1;>tr|A0A0P0VYC3|A0A0P0VYC3_ORYSJ Os03g0397700 protein OS=Oryza sativa subsp. japonica OX=39947 GN=Os03g0397700 PE=4 SV=1	0.928878	7.19e-10	77.529	1	S	LRPIASGKFNQLRTISIISPTAKEGLQKTVS	X;X;X;X;X;X;X;X;X;X;X;X;X;X;X;Phospho (STY);X;X;X;X;X;X;X;X;X;X;X;X;X;X;X	XXXXXXXXXXXXXPPPPPPPPPPXXXXXXXX	T(0.013)IS(0.929)IIS(0.055)PT(0.003)AK	3	2	-1.0818			16989;16990;16991	16990	11244	11996	11875	8459.5	8156.3	8513.6	11307	10607	10285
tr|A0A0N7KHE3|A0A0N7KHE3_ORYSJ;tr|A0A0P0VYC3|A0A0P0VYC3_ORYSJ	46;384	tr|A0A0N7KHE3|A0A0N7KHE3_ORYSJ	tr|A0A0N7KHE3|A0A0N7KHE3_ORYSJ	>tr|A0A0N7KHE3|A0A0N7KHE3_ORYSJ Os03g0397700 protein OS=Oryza sativa subsp. japonica OX=39947 GN=Os03g0397700 PE=4 SV=1;>tr|A0A0P0VYC3|A0A0P0VYC3_ORYSJ Os03g0397700 protein OS=Oryza sativa subsp. japonica OX=39947 GN=Os03g0397700 PE=4 SV=1	0.59692	0.000201141	72.44	1	S	IASGKFNQLRTISIISPTAKEGLQKTVSMNL	X;X;X;X;X;X;X;X;X;X;X;X;X;X;X;Phospho (STY);X;X;X;X;X;X;X;X;X;X;X;X;X;X;X	XXXXXXXXXXPPPPPPPPPPXXXXXXXXXXX	T(0.061)IS(0.315)IIS(0.597)PT(0.027)AK	6	2	-1.8114			16987	16987	6951.7	6619.4	6740.4	5795	5639.5	5435	6805.7	6452.1	6656.8
tr|A0A0N7KHZ6|A0A0N7KHZ6_ORYSJ;tr|Q851F6|Q851F6_ORYSJ	66;196	tr|A0A0N7KHZ6|A0A0N7KHZ6_ORYSJ	tr|A0A0N7KHZ6|A0A0N7KHZ6_ORYSJ	>tr|A0A0N7KHZ6|A0A0N7KHZ6_ORYSJ Os03g0729200 protein (Fragment) OS=Oryza sativa subsp. japonica OX=39947 GN=Os03g0729200 PE=4 SV=1;>tr|Q851F6|Q851F6_ORYSJ Expressed protein OS=Oryza sativa subsp. japonica OX=39947 GN=LOC_Os03g51950 PE=2 SV=1	1	0.00288522	28.967	1	S	TFFNPASASVFSRFDSLKEAVKNYTIEATPD	X;X;X;X;X;X;X;X;X;X;X;X;X;X;X;Phospho (STY);X;X;X;X;X;X;X;X;X;X;X;X;X;X;X	XXXXXXXXXXXXXPPPPPPPPPXXXXXXXXX	FDS(1)LKEAVK	3	2	0.69762			5291;5292;5293;5294;5295;5296	5296	64747	63386	65406	146780	145850	158390	67894	67905	64145
tr|A0A0N7KI17|A0A0N7KI17_ORYSJ	125	tr|A0A0N7KI17|A0A0N7KI17_ORYSJ	tr|A0A0N7KI17|A0A0N7KI17_ORYSJ	>tr|A0A0N7KI17|A0A0N7KI17_ORYSJ Os03g0747600 protein (Fragment) OS=Oryza sativa subsp. japonica OX=39947 GN=Os03g0747600 PE=4 SV=1	0.999428	8.47e-07	96.702	1	S	HIMLTDCTNQKKGIDSPVNETKGDSTPDIVF	X;X;X;X;X;X;X;X;X;X;X;X;X;X;X;Phospho (STY);X;X;X;X;X;X;X;X;X;X;X;X;X;X;X	XXXXXXXXXXXXPPPPPPPPPPXXXXXXXXX	GIDS(0.999)PVNET(0.001)K	4	2	-1.0169			6684;6685;6686	6684	27003	25865	25065	24075	23618	25135	27908	27646	28966
tr|A0A0N7KI38|A0A0N7KI38_ORYSJ	363	tr|A0A0N7KI38|A0A0N7KI38_ORYSJ	tr|A0A0N7KI38|A0A0N7KI38_ORYSJ	>tr|A0A0N7KI38|A0A0N7KI38_ORYSJ Os03g0764450 protein (Fragment) OS=Oryza sativa subsp. japonica OX=39947 GN=Os03g0764450 PE=4 SV=1	0.995938	6.72e-19	139.84	1	S	KHIWPLNSDGPVTSASPERSTPKEKPQKRER	X;X;X;X;X;X;X;X;X;X;X;X;X;X;X;Phospho (STY);X;X;X;X;X;X;X;X;X;X;X;X;X;X;X	XPPPPPPPPPPPPPPPPPPXXXXXXXXXXXX	HIWPLNSDGPVTS(0.004)AS(0.996)PER	15	3	-0.058651			7820;7821;7822;7823	7820	22321	23917	23245	22956	23006	24862	24486	24181	22378
tr|A0A0N7KJ06|A0A0N7KJ06_ORYSJ	22	tr|A0A0N7KJ06|A0A0N7KJ06_ORYSJ	tr|A0A0N7KJ06|A0A0N7KJ06_ORYSJ	>tr|A0A0N7KJ06|A0A0N7KJ06_ORYSJ Uridine monophosphate kinase (Fragment) OS=Oryza sativa subsp. japonica OX=39947 GN=Os04g0405800 PE=3 SV=1	1	2.71e-06	83.403	1	S	VGNSSSPASSKALVASDDDNKPRQPQQHSSK	X;X;X;X;X;X;X;X;X;X;X;X;X;X;X;Phospho (STY);X;X;X;X;X;X;X;X;X;X;X;X;X;X;X	XXXXXXXXXXXPPPPPPPPPPPPXXXXXXXX	ALVAS(1)DDDNKPR	5	3	-0.86114			1273;1274;1275	1275	45542	44949	43618	42968	40139	44162	46479	47552	46628
tr|A0A0N7KJ94|A0A0N7KJ94_ORYSJ;tr|Q7X7I6|Q7X7I6_ORYSJ	12;12	tr|A0A0N7KJ94|A0A0N7KJ94_ORYSJ	tr|A0A0N7KJ94|A0A0N7KJ94_ORYSJ	>tr|A0A0N7KJ94|A0A0N7KJ94_ORYSJ Glucose-6-phosphate dehydrogenase (NADP(+)) OS=Oryza sativa subsp. japonica OX=39947 GN=Os04g0485300 PE=3 SV=1;>tr|Q7X7I6|Q7X7I6_ORYSJ Glucose-6-phosphate 1-dehydrogenase OS=Oryza sativa subsp. japonica OX=39947 GN=Os04g0485	0.787929	0.00489268	51.417	1	S	____MSGGSSPRSRRSSFNSLSRDLELPSEQ	X;X;X;X;X;X;X;X;X;X;X;X;X;X;X;Phospho (STY);X;X;X;X;X;X;X;X;X;X;X;X;X;X;X	XXXXXXXXXXXXXXXPPPPPPPPXXXXXXXX	S(0.788)S(0.212)FNSLSR	1	2	-0.09111			15695	15695	5752.5	5837.9	6421.2	5463	5440.7	5016.9	6897.7	7424.4	7829.9
tr|A0A0N7KJ94|A0A0N7KJ94_ORYSJ;tr|Q7X7I6|Q7X7I6_ORYSJ	13;13	tr|A0A0N7KJ94|A0A0N7KJ94_ORYSJ	tr|A0A0N7KJ94|A0A0N7KJ94_ORYSJ	>tr|A0A0N7KJ94|A0A0N7KJ94_ORYSJ Glucose-6-phosphate dehydrogenase (NADP(+)) OS=Oryza sativa subsp. japonica OX=39947 GN=Os04g0485300 PE=3 SV=1;>tr|Q7X7I6|Q7X7I6_ORYSJ Glucose-6-phosphate 1-dehydrogenase OS=Oryza sativa subsp. japonica OX=39947 GN=Os04g0485	0.997546	0.0155891	113.29	1	S	___MSGGSSPRSRRSSFNSLSRDLELPSEQG	X;X;X;X;X;X;X;X;X;X;X;X;X;X;X;Phospho (STY);X;X;X;X;X;X;X;X;X;X;X;X;X;X;X	XXXXXXXXXXXXXPPPPPPPPPXXXXXXXXX	RS(0.002)S(0.998)FNSLSR	3	2	0.23957			13847;13848;13849	13848	12901	12289	11419	7476.2	8184	8392.3	14633	13215	14466
tr|A0A0N7KJH4|A0A0N7KJH4_ORYSJ	800	tr|A0A0N7KJH4|A0A0N7KJH4_ORYSJ	tr|A0A0N7KJH4|A0A0N7KJH4_ORYSJ	>tr|A0A0N7KJH4|A0A0N7KJH4_ORYSJ Os04g0555600 protein (Fragment) OS=Oryza sativa subsp. japonica OX=39947 GN=Os04g0555600 PE=4 SV=1	0.418329	1.44e-05	90.17		S	DVPCEILGSSIGRKLSSSENQLLKNLGGINF	X;X;X;X;X;X;X;X;X;X;X;X;X;X;X;Phospho (STY);X;X;X;X;X;X;X;X;X;X;X;X;X;X;X	XXXXXXXXXXXXXPPPPPPPPPPPXXXXXXX	KLS(0.418)S(0.418)S(0.163)ENQLLK	3	3	-0.77974				9242	0	0	0	0	0	0	0	0	0
tr|A0A0N7KJH4|A0A0N7KJH4_ORYSJ	801	tr|A0A0N7KJH4|A0A0N7KJH4_ORYSJ	tr|A0A0N7KJH4|A0A0N7KJH4_ORYSJ	>tr|A0A0N7KJH4|A0A0N7KJH4_ORYSJ Os04g0555600 protein (Fragment) OS=Oryza sativa subsp. japonica OX=39947 GN=Os04g0555600 PE=4 SV=1	0.628283	1.36e-05	90.17	1	S	VPCEILGSSIGRKLSSSENQLLKNLGGINFS	X;X;X;X;X;X;X;X;X;X;X;X;X;X;X;Phospho (STY);X;X;X;X;X;X;X;X;X;X;X;X;X;X;X	XXXXXXXXXXXXPPPPPPPPPPPXXXXXXXX	KLS(0.273)S(0.628)S(0.099)ENQLLK	4	3	-0.97793			9243	9243	15068	14563	14657	13242	13516	13865	17961	18106	17761
tr|A0A0N7KJH4|A0A0N7KJH4_ORYSJ	802	tr|A0A0N7KJH4|A0A0N7KJH4_ORYSJ	tr|A0A0N7KJH4|A0A0N7KJH4_ORYSJ	>tr|A0A0N7KJH4|A0A0N7KJH4_ORYSJ Os04g0555600 protein (Fragment) OS=Oryza sativa subsp. japonica OX=39947 GN=Os04g0555600 PE=4 SV=1	0.538322	1.11e-05	81.323	1	S	PCEILGSSIGRKLSSSENQLLKNLGGINFSI	X;X;X;X;X;X;X;X;X;X;X;X;X;X;X;Phospho (STY);X;X;X;X;X;X;X;X;X;X;X;X;X;X;X	XXXXXXXXXXXPPPPPPPPPPPXXXXXXXXX	KLS(0.231)S(0.231)S(0.538)ENQLLK	5	3	-0.97068			9241	9241	11510	11765	11876	10608	9458.7	11022	13915	15209	14593
tr|A0A0N7KJJ0|A0A0N7KJJ0_ORYSJ	91	tr|A0A0N7KJJ0|A0A0N7KJJ0_ORYSJ	tr|A0A0N7KJJ0|A0A0N7KJJ0_ORYSJ	>tr|A0A0N7KJJ0|A0A0N7KJJ0_ORYSJ Os04g0568850 protein (Fragment) OS=Oryza sativa subsp. japonica OX=39947 GN=Os04g0568850 PE=4 SV=1	0.878214	0.0403007	39.162	1	S	SPSVNSYFLLSRPERSGSPPNKAAPDIVPQA	X;X;X;X;X;X;X;X;X;X;X;X;X;X;X;Phospho (STY);X;X;X;X;X;X;X;X;X;X;X;X;X;X;X	XXXXXXXXXXXXXXXPPPPPPPXXXXXXXXX	S(0.878)GS(0.122)PPNK	1	2	0.82565			14822	14822	10955	10162	10023	9845.2	10445	10047	11334	11618	12110
tr|A0A0N7KKA5|A0A0N7KKA5_ORYSJ;tr|A0A0P0WJ59|A0A0P0WJ59_ORYSJ	867;888	tr|A0A0N7KKA5|A0A0N7KKA5_ORYSJ	tr|A0A0N7KKA5|A0A0N7KKA5_ORYSJ	>tr|A0A0N7KKA5|A0A0N7KKA5_ORYSJ Os05g0196100 protein (Fragment) OS=Oryza sativa subsp. japonica OX=39947 GN=Os05g0196100 PE=4 SV=1;>tr|A0A0P0WJ59|A0A0P0WJ59_ORYSJ Os05g0196100 protein OS=Oryza sativa subsp. japonica OX=39947 GN=Os05g0196100 PE=4 SV=1	0.997123	1.3e-21	101.21	1;2	S	ELGAFQYQVPLIQQNSEAEISTGNLKSVQLT	X;X;X;X;X;X;X;X;X;X;X;X;X;X;X;Phospho (STY);X;X;X;X;Phospho (STY);X;X;X;X;X;X;X;X;X;X	PPPPPPPPPPPPPPPPPPPPPPPPPPXXXXX	ELGAFQYQVPLIQQNS(0.997)EAEIS(0.002)T(0.001)GNLK	16	3	0.65575			4357;4358;4359;4360;4361;4362;4363;4364;4365;4366;4367;4368;4369;4370;4371;4372	4357	10915	10524	11315	11115	11610	12107	14423	13545	14353
tr|A0A0N7KKA5|A0A0N7KKA5_ORYSJ;tr|A0A0P0WJ59|A0A0P0WJ59_ORYSJ	872;893	tr|A0A0N7KKA5|A0A0N7KKA5_ORYSJ	tr|A0A0N7KKA5|A0A0N7KKA5_ORYSJ	>tr|A0A0N7KKA5|A0A0N7KKA5_ORYSJ Os05g0196100 protein (Fragment) OS=Oryza sativa subsp. japonica OX=39947 GN=Os05g0196100 PE=4 SV=1;>tr|A0A0P0WJ59|A0A0P0WJ59_ORYSJ Os05g0196100 protein OS=Oryza sativa subsp. japonica OX=39947 GN=Os05g0196100 PE=4 SV=1	0.753998	1.05e-09	61.334	2	S	QYQVPLIQQNSEAEISTGNLKSVQLTEEERR	X;X;X;X;X;X;X;X;X;X;Phospho (STY);X;X;X;X;Phospho (STY);X;X;X;X;X;X;X;X;X;X;X;X;X;X;X	PPPPPPPPPPPPPPPPPPPPPXXXXXXXXXX	ELGAFQY(0.065)QVPLIQQNS(0.931)EAEIS(0.754)T(0.25)GNLK	21	3	1.2948			4364;4365;4366;4367;4368;4369;4370;4371;4372	4369	3479.7	3392.7	3975.3	2298.3	2834.1	3008.4	4273.5	3969.5	4623
tr|A0A0N7KLN2|A0A0N7KLN2_ORYSJ	396	tr|A0A0N7KLN2|A0A0N7KLN2_ORYSJ	tr|A0A0N7KLN2|A0A0N7KLN2_ORYSJ	>tr|A0A0N7KLN2|A0A0N7KLN2_ORYSJ Os06g0183800 protein (Fragment) OS=Oryza sativa subsp. japonica OX=39947 GN=Os06g0183800 PE=4 SV=1	0.786937	6.23e-19	116.32	1	S	PKEEVMLDASSKETTSPKDPATEVPSSASKE	X;X;X;X;X;X;X;X;X;X;X;X;X;X;X;Phospho (STY);X;X;X;X;X;X;X;X;X;X;X;X;X;X;X	XXXXXXXXXXXXPPPPPPPPPPPPPPPPPPX	ET(0.03)T(0.183)S(0.787)PKDPATEVPSSASK	4	3	-0.20451			4997	4997	16245	16685	14859	13361	13787	13859	17191	16638	17963
tr|A0A0N7KLY1|A0A0N7KLY1_ORYSJ;tr|Q5VMT5|Q5VMT5_ORYSJ	1063;1545	tr|A0A0N7KLY1|A0A0N7KLY1_ORYSJ	tr|A0A0N7KLY1|A0A0N7KLY1_ORYSJ	>tr|A0A0N7KLY1|A0A0N7KLY1_ORYSJ Os06g0286351 protein OS=Oryza sativa subsp. japonica OX=39947 GN=Os06g0286351 PE=4 SV=1;>tr|Q5VMT5|Q5VMT5_ORYSJ Os06g0286351 protein OS=Oryza sativa subsp. japonica OX=39947 GN=Os06g0286351 PE=2 SV=1	0.999887	1.84e-05	60.007	1	S	KEEEPDDHNLNSKEESDNETLSVWKKRTAKA	X;X;X;X;X;X;X;X;X;X;X;X;X;X;X;Phospho (STY);X;X;X;X;X;X;X;X;X;X;X;X;X;X;X	XXXXXXXXXXXXXPPPPPPPPPPPPXXXXXX	EES(1)DNETLSVWK	3	3	0.63191			3906	3906	1872.9	1693	1785.4	2417.9	2919.4	2938.3	3477.9	2483.9	2857.6
tr|A0A0N7KLY1|A0A0N7KLY1_ORYSJ;tr|Q5VMT5|Q5VMT5_ORYSJ	823;1305	tr|A0A0N7KLY1|A0A0N7KLY1_ORYSJ	tr|A0A0N7KLY1|A0A0N7KLY1_ORYSJ	>tr|A0A0N7KLY1|A0A0N7KLY1_ORYSJ Os06g0286351 protein OS=Oryza sativa subsp. japonica OX=39947 GN=Os06g0286351 PE=4 SV=1;>tr|Q5VMT5|Q5VMT5_ORYSJ Os06g0286351 protein OS=Oryza sativa subsp. japonica OX=39947 GN=Os06g0286351 PE=2 SV=1	0.855176	1.5e-05	77.822	1	S	KGKKGAKKPHAEILSSSPKKSDEAGSSKRTV	X;X;X;X;X;X;X;X;X;X;X;X;X;X;X;Phospho (STY);X;X;X;X;X;X;X;X;X;X;X;X;X;X;X	XXXXXXXPPPPPPPPPPPPXXXXXXXXXXXX	KPHAEILS(0.029)S(0.855)S(0.116)PK	9	3	-0.35496			9317;9318	9318	21578	20556	20898	20341	21213	20801	24014	23216	22158
tr|A0A0N7KLY1|A0A0N7KLY1_ORYSJ;tr|Q5VMT5|Q5VMT5_ORYSJ	824;1306	tr|A0A0N7KLY1|A0A0N7KLY1_ORYSJ	tr|A0A0N7KLY1|A0A0N7KLY1_ORYSJ	>tr|A0A0N7KLY1|A0A0N7KLY1_ORYSJ Os06g0286351 protein OS=Oryza sativa subsp. japonica OX=39947 GN=Os06g0286351 PE=4 SV=1;>tr|Q5VMT5|Q5VMT5_ORYSJ Os06g0286351 protein OS=Oryza sativa subsp. japonica OX=39947 GN=Os06g0286351 PE=2 SV=1	0.901795	4.14e-05	66.217	1	S	GKKGAKKPHAEILSSSPKKSDEAGSSKRTVD	X;X;X;X;X;X;X;X;X;X;X;X;X;X;X;Phospho (STY);X;X;X;X;X;X;X;X;X;X;X;X;X;X;X	XXXXXXPPPPPPPPPPPPXXXXXXXXXXXXX	KPHAEILS(0.008)S(0.09)S(0.902)PK	10	3	-0.47003			9316	9316	10089	9731.8	10444	9533.7	10597	9952	11627	11323	11830
tr|A0A0N7KLY1|A0A0N7KLY1_ORYSJ;tr|Q5VMT5|Q5VMT5_ORYSJ	790;1272	tr|A0A0N7KLY1|A0A0N7KLY1_ORYSJ	tr|A0A0N7KLY1|A0A0N7KLY1_ORYSJ	>tr|A0A0N7KLY1|A0A0N7KLY1_ORYSJ Os06g0286351 protein OS=Oryza sativa subsp. japonica OX=39947 GN=Os06g0286351 PE=4 SV=1;>tr|Q5VMT5|Q5VMT5_ORYSJ Os06g0286351 protein OS=Oryza sativa subsp. japonica OX=39947 GN=Os06g0286351 PE=2 SV=1	0.999815	1.12e-18	133.14	1	S	NSFENKVEGAKKRDDSVDTELVTSPASVKTP	X;Phospho (STY);X;X;X;X;X;X;X;X;X;X;X;X;X;Phospho (STY);X;X;X;X;X;X;X;X;X;X;X;X;X;X;X	XXXXXXXXXXXPPPPPPPPPPPPPPPPPPXX	KRDDS(1)VDTELVTSPASVK	5	3	0.93476			9428;9429;9430;9431;9432;9433	9432	42612	57638	36192	44898	39801	43848	41022	39070	40263
tr|A0A0N7KLY1|A0A0N7KLY1_ORYSJ;tr|Q5VMT5|Q5VMT5_ORYSJ;tr|A0A0P0WVA0|A0A0P0WVA0_ORYSJ	644;1126;566	tr|A0A0N7KLY1|A0A0N7KLY1_ORYSJ	tr|A0A0N7KLY1|A0A0N7KLY1_ORYSJ	>tr|A0A0N7KLY1|A0A0N7KLY1_ORYSJ Os06g0286351 protein OS=Oryza sativa subsp. japonica OX=39947 GN=Os06g0286351 PE=4 SV=1;>tr|Q5VMT5|Q5VMT5_ORYSJ Os06g0286351 protein OS=Oryza sativa subsp. japonica OX=39947 GN=Os06g0286351 PE=2 SV=1;>tr|A0A0P0WVA0|A0A0P0WVA	0.999999	0.000132853	82.647	1	S	AHFEALMTAKSAEVESPKDKMLIDETDEFGN	X;X;X;X;X;X;X;X;X;X;X;X;X;X;X;Phospho (STY);X;X;X;X;X;X;X;X;X;X;X;X;X;X;X	XXXXXXXXXXPPPPPPPPPPXXXXXXXXXXX	SAEVES(1)PKDK	6	2	0.25845			14045;14046;14047;14048;14049;14050;14051;14052;14053;14054	14048	97279	91358	91774	86558	83226	87017	96225	98842	98346
tr|A0A0N7KLY1|A0A0N7KLY1_ORYSJ;tr|Q5VMT5|Q5VMT5_ORYSJ	953;1435	tr|A0A0N7KLY1|A0A0N7KLY1_ORYSJ	tr|A0A0N7KLY1|A0A0N7KLY1_ORYSJ	>tr|A0A0N7KLY1|A0A0N7KLY1_ORYSJ Os06g0286351 protein OS=Oryza sativa subsp. japonica OX=39947 GN=Os06g0286351 PE=4 SV=1;>tr|Q5VMT5|Q5VMT5_ORYSJ Os06g0286351 protein OS=Oryza sativa subsp. japonica OX=39947 GN=Os06g0286351 PE=2 SV=1	0.510728	3.11e-06	53.164	1	S	SGRNQGRAQDKSITSSKQTPPPEQEKSKKRP	X;X;X;X;X;X;X;X;X;X;X;X;X;X;X;Phospho (STY);X;X;X;X;X;X;X;X;X;X;X;X;X;X;X	XXXXXXXXXXXPPPPPPPPPPPPPPPXXXXX	S(0.012)IT(0.152)S(0.152)S(0.511)KQT(0.173)PPPEQEK	5	3	1.1823			14963	14963	5574.2	5616.4	5124.5	6306.7	6215.3	6235.6	6534.2	6207.3	5558.3
tr|A0A0N7KLY1|A0A0N7KLY1_ORYSJ;tr|Q5VMT5|Q5VMT5_ORYSJ	776;1258	tr|A0A0N7KLY1|A0A0N7KLY1_ORYSJ	tr|A0A0N7KLY1|A0A0N7KLY1_ORYSJ	>tr|A0A0N7KLY1|A0A0N7KLY1_ORYSJ Os06g0286351 protein OS=Oryza sativa subsp. japonica OX=39947 GN=Os06g0286351 PE=4 SV=1;>tr|Q5VMT5|Q5VMT5_ORYSJ Os06g0286351 protein OS=Oryza sativa subsp. japonica OX=39947 GN=Os06g0286351 PE=2 SV=1	0.98279	8.98e-16	80.764	1	S	DELLLQSVDPDETINSFENKVEGAKKRDDSV	X;X;X;X;X;X;X;X;X;X;X;X;X;X;X;Phospho (STY);X;X;X;X;X;X;X;X;X;X;X;X;X;Phospho (STY);X	PPPPPPPPPPPPPPPPPPPPPPPPPXXXXXX	YSDELLLQSVDPDET(0.017)INS(0.983)FENKVEGAK	18	4	-0.57618			20065;20066	20065	1706.8	1851.4	1372.8	1511.6	1660.6	1731.1	1842.8	2193.1	1975.5
tr|A0A0N7KML3|A0A0N7KML3_ORYSJ	512	tr|A0A0N7KML3|A0A0N7KML3_ORYSJ	tr|A0A0N7KML3|A0A0N7KML3_ORYSJ	>tr|A0A0N7KML3|A0A0N7KML3_ORYSJ Os06g0679800 protein OS=Oryza sativa subsp. japonica OX=39947 GN=Os06g0679800 PE=4 SV=1	0.999825	0.0424263	31.435	1	S	HELDMFYRNIVRYKGSPARADSSGGSDHMHT	X;X;X;X;X;X;X;X;X;X;X;X;X;X;X;Phospho (STY);X;X;X;X;X;X;X;X;X;X;X;X;X;X;X	XXXXXXXXXXXXPPPPPPPXXXXXXXXXXXX	YKGS(1)PAR	4	2	0.11052			19879;19880	19880	23120	21801	20671	19839	19725	20274	24334	23162	23434
tr|A0A0N7KN09|A0A0N7KN09_ORYSJ	226	tr|A0A0N7KN09|A0A0N7KN09_ORYSJ	tr|A0A0N7KN09|A0A0N7KN09_ORYSJ	>tr|A0A0N7KN09|A0A0N7KN09_ORYSJ Os07g0179200 protein (Fragment) OS=Oryza sativa subsp. japonica OX=39947 GN=Os07g0179200 PE=4 SV=1	0.9852	0.00268373	63.011	1	S	LRSGRDGGGPDHRNSSPPVNRGRSRSRSKSR	X;X;X;X;X;X;X;X;X;X;X;X;X;X;X;Phospho (STY);X;X;X;X;X;X;X;X;X;X;X;X;X;X;X	XXXXXXXXXXXXXPPPPPPPPXXXXXXXXXX	NS(0.015)S(0.985)PPVNR	3	2	-0.0045681			12499;12500;12501;12502	12499	22722	22700	21555	25103	24097	26010	23947	23458	23508
tr|A0A0N7KN09|A0A0N7KN09_ORYSJ	42	tr|A0A0N7KN09|A0A0N7KN09_ORYSJ	tr|A0A0N7KN09|A0A0N7KN09_ORYSJ	>tr|A0A0N7KN09|A0A0N7KN09_ORYSJ Os07g0179200 protein (Fragment) OS=Oryza sativa subsp. japonica OX=39947 GN=Os07g0179200 PE=4 SV=1	0.5	2.76e-06	82.792	1	S	GNGAGIRDDPGARARSSPIRADASLTKVDGN	X;X;X;X;X;X;X;X;X;X;X;X;X;X;X;Phospho (STY);X;X;X;X;X;X;X;X;X;X;X;X;X;X;X	XXXXXXXXXXXXXXXPPPPPPPPPPPPXXXX	S(0.5)S(0.5)PIRADASLTK	1	3	0.31108			15774	15774	14104	14189	13578	15507	14946	15131	12989	15486	15440
tr|A0A0N7KN09|A0A0N7KN09_ORYSJ	43	tr|A0A0N7KN09|A0A0N7KN09_ORYSJ	tr|A0A0N7KN09|A0A0N7KN09_ORYSJ	>tr|A0A0N7KN09|A0A0N7KN09_ORYSJ Os07g0179200 protein (Fragment) OS=Oryza sativa subsp. japonica OX=39947 GN=Os07g0179200 PE=4 SV=1	0.957599	2.23e-06	86.434	1	S	NGAGIRDDPGARARSSPIRADASLTKVDGNN	X;X;X;X;X;X;X;X;X;X;X;X;X;X;X;Phospho (STY);X;X;X;X;X;X;X;X;X;X;X;X;X;X;X	XXXXXXXXXXXXXXPPPPPPPPPPPPXXXXX	S(0.042)S(0.958)PIRADASLTK	2	3	0.45433			15774;15775;15776	15776	44571	44475	42786	49943	49338	49786	43885	45030	48722
tr|A0A0N7KNC0|A0A0N7KNC0_ORYSJ	132	tr|A0A0N7KNC0|A0A0N7KNC0_ORYSJ	tr|A0A0N7KNC0|A0A0N7KNC0_ORYSJ	>tr|A0A0N7KNC0|A0A0N7KNC0_ORYSJ Os07g0421866 protein OS=Oryza sativa subsp. japonica OX=39947 GN=Os07g0421866 PE=4 SV=1	0.999998	3.43e-14	79.111	1	S	CTASFGPPPPPPPPPSPKDAAADPAKEPSGS	X;X;X;X;X;X;X;X;X;X;X;X;X;X;X;Phospho (STY);X;X;X;X;X;X;X;X;X;X;X;X;X;X;X	PPPPPPPPPPPPPPPPPPXXXXXXXXXXXXX	LLDIVACTASFGPPPPPPPPPS(1)PK	22	4	-1.8927			10413;10414;10415;10416	10416	1741.2	1927	1413.6	1467.4	1221.8	1835	1748.9	1486.5	1833.3
tr|A0A0N7KNC0|A0A0N7KNC0_ORYSJ	162	tr|A0A0N7KNC0|A0A0N7KNC0_ORYSJ	tr|A0A0N7KNC0|A0A0N7KNC0_ORYSJ	>tr|A0A0N7KNC0|A0A0N7KNC0_ORYSJ Os07g0421866 protein OS=Oryza sativa subsp. japonica OX=39947 GN=Os07g0421866 PE=4 SV=1	0.998775	3.49e-10	93.104	1;2	S	SKAGSAAATGGRRTGSPPPSPAPVAKDAATK	X;X;X;X;X;X;X;X;X;X;X;X;X;X;X;Phospho (STY);X;X;X;Phospho (STY);X;X;X;X;X;X;X;X;X;X;X	XXXXXXXXXXXXPPPPPPPPPPPPPPXXXXX	T(0.001)GS(0.999)PPPSPAPVAK	3	2	0.33148			13879;13880;13881;13883;13884;13885;13887;13889;13890;13891;13892;16867;16868;16869;16870;16872;16873;16874;16875;16876	16868	141820	140550	135110	114320	110830	114790	127020	129930	131240
tr|A0A0N7KNC0|A0A0N7KNC0_ORYSJ	166	tr|A0A0N7KNC0|A0A0N7KNC0_ORYSJ	tr|A0A0N7KNC0|A0A0N7KNC0_ORYSJ	>tr|A0A0N7KNC0|A0A0N7KNC0_ORYSJ Os07g0421866 protein OS=Oryza sativa subsp. japonica OX=39947 GN=Os07g0421866 PE=4 SV=1	0.999998	6.57e-08	79.354	2	S	SAAATGGRRTGSPPPSPAPVAKDAATKDDAA	X;X;X;X;X;X;X;X;X;X;X;Phospho (STY);X;X;X;Phospho (STY);X;X;X;X;X;X;X;X;X;X;X;X;X;X;X	XXXXXXXXPPPPPPPPPPPPPPXXXXXXXXX	RT(0.21)GS(0.79)PPPS(1)PAPVAK	8	3	0.058119			13890;13891;13892;16873;16874;16875;16876	13890	53278	49728	49103	35670	35973	36380	39991	41041	43638
tr|A0A0N7KNQ0|A0A0N7KNQ0_ORYSJ	161	tr|A0A0N7KNQ0|A0A0N7KNQ0_ORYSJ	tr|A0A0N7KNQ0|A0A0N7KNQ0_ORYSJ	>tr|A0A0N7KNQ0|A0A0N7KNQ0_ORYSJ Os07g0571100 protein (Fragment) OS=Oryza sativa subsp. japonica OX=39947 GN=Os07g0571100 PE=4 SV=1	0.489804	6.69e-09	60.176		S	HKLEVRDAPEAKSGNSSPAPSSSVARPSDST	X;X;X;X;X;X;X;X;X;X;X;X;X;X;X;Phospho (STY);X;X;X;X;X;X;X;X;X;X;X;X;X;X;X	XXXXXXXXXXXXPPPPPPPPPPPPPPXXXXX	S(0.003)GNS(0.49)S(0.49)PAPS(0.01)S(0.003)S(0.004)VAR	4	2	-0.66504				14682	0	0	0	0	0	0	0	0	0
tr|A0A0N7KNQ0|A0A0N7KNQ0_ORYSJ	162	tr|A0A0N7KNQ0|A0A0N7KNQ0_ORYSJ	tr|A0A0N7KNQ0|A0A0N7KNQ0_ORYSJ	>tr|A0A0N7KNQ0|A0A0N7KNQ0_ORYSJ Os07g0571100 protein (Fragment) OS=Oryza sativa subsp. japonica OX=39947 GN=Os07g0571100 PE=4 SV=1	0.781723	6.69e-09	66.93	1	S	KLEVRDAPEAKSGNSSPAPSSSVARPSDSTS	X;X;X;X;X;X;X;X;X;X;X;X;X;X;X;Phospho (STY);X;X;X;X;X;X;X;X;X;X;X;X;X;X;X	XXXXXXXXXXXPPPPPPPPPPPPPPXXXXXX	S(0.053)GNS(0.159)S(0.782)PAPS(0.004)S(0.001)S(0.001)VAR	5	2	0.57316			14680;14681	14681	5006.9	4741	3542.3	5322.8	4654.3	5584.6	4428	4525.1	4370.9
tr|A0A0N7KP48|A0A0N7KP48_ORYSJ	82	tr|A0A0N7KP48|A0A0N7KP48_ORYSJ	tr|A0A0N7KP48|A0A0N7KP48_ORYSJ	>tr|A0A0N7KP48|A0A0N7KP48_ORYSJ Os08g0103000 protein (Fragment) OS=Oryza sativa subsp. japonica OX=39947 GN=Os08g0103000 PE=4 SV=1	1	0.00898022	48.593	1	S	PDSDFDPCQRLMEDLSLERRRRNDTGDNTGS	X;X;X;X;X;X;X;X;X;X;X;X;X;X;X;Phospho (STY);X;X;X;X;X;X;X;X;X;X;X;X;X;X;X	XXXXXXXXXXPPPPPPPPPXXXXXXXXXXXX	LMEDLS(1)LER	6	2	-1.5327			10577;10578;10579	10579	18187	17391	17296	15637	16078	16909	16653	17417	15959
tr|A0A0P0XC48|A0A0P0XC48_ORYSJ;tr|A0A0N7KPA9|A0A0N7KPA9_ORYSJ;tr|Q0J7W9|Q0J7W9_ORYSJ	25;238;623	tr|A0A0P0XC48|A0A0P0XC48_ORYSJ	tr|A0A0P0XC48|A0A0P0XC48_ORYSJ	>tr|A0A0P0XC48|A0A0P0XC48_ORYSJ Os08g0157600 protein (Fragment) OS=Oryza sativa subsp. japonica OX=39947 GN=Os08g0157600 PE=4 SV=1;>tr|A0A0N7KPA9|A0A0N7KPA9_ORYSJ Os08g0157600 protein (Fragment) OS=Oryza sativa subsp. japonica OX=39947 GN=Os08g0157600 PE=4	0.950131	1.37e-08	69.775	1	S	AFDALFSRERLPQSFSPPQVEGSKEISKEEE	X;X;X;X;X;X;X;X;X;X;X;X;X;X;X;Phospho (STY);X;X;X;X;X;X;X;X;X;X;X;X;X;X;X	XXXXXXXXPPPPPPPPPPPPPPPPXXXXXXX	ERLPQS(0.05)FS(0.95)PPQVEGSK	8	3	0.22873			4807;4808;4809;10750;10751	4809	28497	27502	25446	16582	15432	15571	33546	34024	34684
tr|A0A0N7KPF3|A0A0N7KPF3_ORYSJ;tr|Q6Z1A3|Q6Z1A3_ORYSJ	87;245	tr|A0A0N7KPF3|A0A0N7KPF3_ORYSJ	tr|A0A0N7KPF3|A0A0N7KPF3_ORYSJ	>tr|A0A0N7KPF3|A0A0N7KPF3_ORYSJ Os08g0200600 protein (Fragment) OS=Oryza sativa subsp. japonica OX=39947 GN=Os08g0200600 PE=4 SV=1;>tr|Q6Z1A3|Q6Z1A3_ORYSJ Os08g0200600 protein OS=Oryza sativa subsp. japonica OX=39947 GN=Os08g0200600 PE=2 SV=1	0.542848	1.4e-07	63.517	1	S	QVSCFSGLPALPMKGSISFGDLLAMDTSAEK	X;X;X;X;X;X;X;X;X;X;X;X;X;X;X;Phospho (STY);X;X;X;X;X;X;X;X;X;X;X;X;X;X;X	XXXXXXXXXXXXXXPPPPPPPPPPPPPPPPP	GS(0.543)IS(0.457)FGDLLAMDTSAEK	2	3	0.19982			7388	7388	352.57	525.95	282.94	468.82	442.94	376.06	468.35	630.41	706.11
tr|A0A0N7KPF3|A0A0N7KPF3_ORYSJ;tr|Q6Z1A3|Q6Z1A3_ORYSJ	89;247	tr|A0A0N7KPF3|A0A0N7KPF3_ORYSJ	tr|A0A0N7KPF3|A0A0N7KPF3_ORYSJ	>tr|A0A0N7KPF3|A0A0N7KPF3_ORYSJ Os08g0200600 protein (Fragment) OS=Oryza sativa subsp. japonica OX=39947 GN=Os08g0200600 PE=4 SV=1;>tr|Q6Z1A3|Q6Z1A3_ORYSJ Os08g0200600 protein OS=Oryza sativa subsp. japonica OX=39947 GN=Os08g0200600 PE=2 SV=1	0.814851	3.22e-11	77.067	1	S	SCFSGLPALPMKGSISFGDLLAMDTSAEKKA	X;X;X;X;X;X;X;X;X;X;X;X;X;X;X;Phospho (STY);X;X;X;X;X;X;X;X;X;X;X;X;X;X;X	XXXXXXXXXXXXPPPPPPPPPPPPPPPPPXX	GS(0.185)IS(0.815)FGDLLAMDTSAEK	4	3	0.96708			7387;7389	7389	1798.1	2326.1	1932	1742.5	1788.5	1794.1	2174.5	2659.8	2785.8
tr|A0A0N7KPM4|A0A0N7KPM4_ORYSJ;tr|Q0J6K0|Q0J6K0_ORYSJ	498;628	tr|A0A0N7KPM4|A0A0N7KPM4_ORYSJ	tr|A0A0N7KPM4|A0A0N7KPM4_ORYSJ	>tr|A0A0N7KPM4|A0A0N7KPM4_ORYSJ Os08g0305300 protein (Fragment) OS=Oryza sativa subsp. japonica OX=39947 GN=Os08g0305300 PE=4 SV=1;>tr|Q0J6K0|Q0J6K0_ORYSJ Os08g0305300 protein OS=Oryza sativa subsp. japonica OX=39947 GN=Os08g0305300 PE=2 SV=1	1	1.24e-12	124.28	1	S	TNHIQQEPEVSSKIGSVAEDLGVLQSKAQLF	X;X;X;X;X;X;X;X;X;X;X;X;X;X;X;Phospho (STY);X;X;X;X;X;X;X;X;X;X;X;X;X;X;X	XXXXXXXXXXXXXPPPPPPPPPPPPPPXXXX	IGS(1)VAEDLGVLQSK	3	3	-0.24269			8299;8300;8301	8300	4520.9	5757.1	4393	7003.5	6699.6	7560.5	5500.8	5279.8	4870.7
tr|A0A0N7KPW3|A0A0N7KPW3_ORYSJ;tr|Q0J5J9|Q0J5J9_ORYSJ	653;1080	tr|A0A0N7KPW3|A0A0N7KPW3_ORYSJ	tr|A0A0N7KPW3|A0A0N7KPW3_ORYSJ	>tr|A0A0N7KPW3|A0A0N7KPW3_ORYSJ Os08g0430000 protein (Fragment) OS=Oryza sativa subsp. japonica OX=39947 GN=Os08g0430000 PE=4 SV=1;>tr|Q0J5J9|Q0J5J9_ORYSJ Os08g0430000 protein OS=Oryza sativa subsp. japonica OX=39947 GN=Os08g0430000 PE=2 SV=1	0.993523	1.53e-11	103.45	1	S	QWVENSNNSRTTWRKSPDYYNYGLPGPRNAA	X;X;X;X;X;X;X;X;X;X;X;X;X;X;X;Phospho (STY);X;X;X;X;X;X;X;X;X;X;X;X;X;X;X	XXXXXXXXXXXXXXPPPPPPPPPPPPPPXXX	KS(0.994)PDY(0.005)Y(0.001)NY(0.001)GLPGPR	2	3	0.63295			9486;9487;9488	9486	17836	18335	17107	20599	20893	22486	18954	19127	19347
tr|A0A0N7KQR8|A0A0N7KQR8_ORYSJ	26	tr|A0A0N7KQR8|A0A0N7KQR8_ORYSJ	tr|A0A0N7KQR8|A0A0N7KQR8_ORYSJ	>tr|A0A0N7KQR8|A0A0N7KQR8_ORYSJ Os09g0401600 protein OS=Oryza sativa subsp. japonica OX=39947 GN=Os09g0401600 PE=4 SV=1	0.5	3.55e-11	92.077	1	S	GGIRQAVLLLERARPSTPPQTQADAKETCPN	X;X;X;X;X;X;X;X;X;X;X;X;X;X;X;Phospho (STY);X;X;X;X;X;X;X;X;X;X;X;X;X;X;X	XXXXXXXXXXXXPPPPPPPPPPPPPPXXXXX	ARPS(0.5)T(0.5)PPQTQADAK	4	3	0.77256			1675;1676	1675	13993	13219	12914	14584	12941	14345	15208	13605	15132
tr|Q2QYF8|Q2QYF8_ORYSJ;tr|A0A0N7KSC9|A0A0N7KSC9_ORYSJ	216;216	tr|Q2QYF8|Q2QYF8_ORYSJ	tr|Q2QYF8|Q2QYF8_ORYSJ	>tr|Q2QYF8|Q2QYF8_ORYSJ Cytidylyltransferase family protein, expressed OS=Oryza sativa subsp. japonica OX=39947 GN=LOC_Os12g02820 PE=2 SV=2;>tr|A0A0N7KSC9|A0A0N7KSC9_ORYSJ Os11g0123400 protein OS=Oryza sativa subsp. japonica OX=39947 GN=Os11g0123400 PE=3 S	1	0.000437306	73.383	1	S	SASDSHNHSSLQRQFSHGHGQKIDDSGSGSG	X;X;X;X;X;X;X;X;X;X;X;X;X;X;X;Phospho (STY);X;X;X;X;X;X;X;X;X;X;X;X;X;X;X	XXXXXXXXXXXXXPPPPPPPPPXXXXXXXXX	QFS(1)HGHGQK	3	2	0.21926			12903;12904;12905;12906;12907;12908;12909;12910;12911	12911	48123	45115	43892	40237	39879	40792	60130	60184	62043
tr|A0A0N7KTV9|A0A0N7KTV9_ORYSJ	46	tr|A0A0N7KTV9|A0A0N7KTV9_ORYSJ	tr|A0A0N7KTV9|A0A0N7KTV9_ORYSJ	>tr|A0A0N7KTV9|A0A0N7KTV9_ORYSJ Os12g0280301 protein OS=Oryza sativa subsp. japonica OX=39947 GN=Os12g0280301 PE=4 SV=1	0.249995	0.00622741	14.065		S	VLTPVARAPSGDRAPSGDTVGSTVRREGKEP	X;X;X;X;X;X;X;X;X;X;X;X;X;X;X;Phospho (STY);X;X;X;X;X;X;X;X;X;X;X;X;X;X;X	XXXXXXXPPPPPPPPPPPPPPPPPPXXXXXX	APSGDRAPS(0.25)GDT(0.25)VGS(0.25)T(0.25)VR	9	2	-4.424				1518	0	0	0	0	0	0	0	0	0
tr|A0A0N7KTV9|A0A0N7KTV9_ORYSJ	52	tr|A0A0N7KTV9|A0A0N7KTV9_ORYSJ	tr|A0A0N7KTV9|A0A0N7KTV9_ORYSJ	>tr|A0A0N7KTV9|A0A0N7KTV9_ORYSJ Os12g0280301 protein OS=Oryza sativa subsp. japonica OX=39947 GN=Os12g0280301 PE=4 SV=1	0.249995	0.00622741	14.065		S	RAPSGDRAPSGDTVGSTVRREGKEPMEESRV	X;X;X;X;X;X;X;X;X;X;X;X;X;X;X;X;X;X;X;X;X;X;X;X;X;X;X;X;X;X;X	XXXXXXXXXXXXXXXXXXXXXXXXXXXXXXX	APSGDRAPS(0.25)GDT(0.25)VGS(0.25)T(0.25)VR	15	2	-4.424				1518	0	0	0	0	0	0	0	0	0
tr|A0A0P0UYD8|A0A0P0UYD8_ORYSJ	373	tr|A0A0P0UYD8|A0A0P0UYD8_ORYSJ	tr|A0A0P0UYD8|A0A0P0UYD8_ORYSJ	>tr|A0A0P0UYD8|A0A0P0UYD8_ORYSJ Os01g0155400 protein (Fragment) OS=Oryza sativa subsp. japonica OX=39947 GN=Os01g0155400 PE=4 SV=1	0.740957	4.98e-08	76.7	1	S	EVRRAKVPTKERAESSPSPVQVPSTPKAETV	X;X;X;X;X;X;X;X;X;X;X;X;X;X;X;Phospho (STY);X;X;X;X;X;X;X;X;X;X;X;X;X;X;X	XXXXXXXXXXXXPPPPPPPPPPPPPPPXXXX	AES(0.116)S(0.741)PS(0.143)PVQVPSTPK	4	3	0.079108			578;579	578	14300	14389	14273	12428	12958	12335	13960	14497	15141
tr|A0A0P0UYD8|A0A0P0UYD8_ORYSJ	375	tr|A0A0P0UYD8|A0A0P0UYD8_ORYSJ	tr|A0A0P0UYD8|A0A0P0UYD8_ORYSJ	>tr|A0A0P0UYD8|A0A0P0UYD8_ORYSJ Os01g0155400 protein (Fragment) OS=Oryza sativa subsp. japonica OX=39947 GN=Os01g0155400 PE=4 SV=1	0.460488	8.41e-08	64.616		S	RRAKVPTKERAESSPSPVQVPSTPKAETVVS	X;X;X;X;X;X;X;X;X;X;X;X;X;X;X;X;X;X;X;X;X;X;X;X;X;X;X;X;X;X;Phospho (STY)	XXXXXXXXXXXXXXXXXXXXXXXXXXXXXXX	AES(0.079)S(0.46)PS(0.46)PVQVPSTPK	6	3	0.77074				577	0	0	0	0	0	0	0	0	0
tr|A0A0P0UYD8|A0A0P0UYD8_ORYSJ	390	tr|A0A0P0UYD8|A0A0P0UYD8_ORYSJ	tr|A0A0P0UYD8|A0A0P0UYD8_ORYSJ	>tr|A0A0P0UYD8|A0A0P0UYD8_ORYSJ Os01g0155400 protein (Fragment) OS=Oryza sativa subsp. japonica OX=39947 GN=Os01g0155400 PE=4 SV=1	0.999726	1.03e-33	127.86	1;2	S	SPVQVPSTPKAETVVSPKSPAKPDQPLDLDS	X;X;X;X;X;X;X;X;X;X;X;X;X;X;X;Phospho (STY);X;X;Phospho (STY);X;X;X;X;X;X;X;X;X;X;X;X	XXXXXXXXXXPPPPPPPPPPPPPPPPPPPPP	AETVVS(1)PK	6	3	0.76908			586;587;588;589;590;591;592;593;594;595	591	117650	114590	114440	124260	117370	124900	112240	113900	114590
tr|A0A0P0UYD8|A0A0P0UYD8_ORYSJ	393	tr|A0A0P0UYD8|A0A0P0UYD8_ORYSJ	tr|A0A0P0UYD8|A0A0P0UYD8_ORYSJ	>tr|A0A0P0UYD8|A0A0P0UYD8_ORYSJ Os01g0155400 protein (Fragment) OS=Oryza sativa subsp. japonica OX=39947 GN=Os01g0155400 PE=4 SV=1	0.999568	1.03e-33	127.86	1;2	S	QVPSTPKAETVVSPKSPAKPDQPLDLDSELA	X;X;X;X;X;X;X;X;X;X;X;X;Phospho (STY);X;X;Phospho (STY);X;X;X;X;X;X;X;X;X;X;X;X;X;X;X	XXXXXXXPPPPPPPPPPPPPPPPPPPPPPPP	S(1)PAKPDQPLDLDSELAK	1	3	0.40612			592;593;594;595;15419	15419	32576	30994	31142	22341	21738	23966	25675	26326	27929
tr|A0A0P0UZB5|A0A0P0UZB5_ORYSJ	45	tr|A0A0P0UZB5|A0A0P0UZB5_ORYSJ	tr|A0A0P0UZB5|A0A0P0UZB5_ORYSJ	>tr|A0A0P0UZB5|A0A0P0UZB5_ORYSJ Os01g0199700 protein OS=Oryza sativa subsp. japonica OX=39947 GN=Os01g0199700 PE=4 SV=1	1	0.000182232	61.282	1	S	EKPRRISMEGLQRAMSDLALELTKKQQVADA	X;X;X;X;X;X;X;X;X;X;X;X;X;X;X;Phospho (STY);X;X;X;X;X;X;X;X;X;X;X;X;X;X;X	XXXXXXXXXXXXXPPPPPPPPPPPXXXXXXX	AMS(1)DLALELTK	3	3	0.30456			1346;1347;1348	1347	3447.4	4052.2	3308.7	2032.6	2131.4	1696.2	2161.3	2463.9	2070.3
tr|A0A0P0UZW5|A0A0P0UZW5_ORYSJ;tr|Q5QNL2|Q5QNL2_ORYSJ	173;199	tr|A0A0P0UZW5|A0A0P0UZW5_ORYSJ	tr|A0A0P0UZW5|A0A0P0UZW5_ORYSJ	>tr|A0A0P0UZW5|A0A0P0UZW5_ORYSJ DNA polymerase delta subunit 3 (Fragment) OS=Oryza sativa subsp. japonica OX=39947 GN=Os01g0204000 PE=4 SV=1;>tr|Q5QNL2|Q5QNL2_ORYSJ DNA polymerase delta subunit 3 OS=Oryza sativa subsp. japonica OX=39947 GN=Os01g0204000 PE=	0.856627	5.33e-08	91.684	1	S	EQSAKGQQQGLPGSSSPKKGTSNKAEKDISS	X;X;X;X;X;X;X;X;X;X;X;X;X;X;X;Phospho (STY);X;X;X;X;X;X;X;X;X;X;X;X;X;X;X	XXXXXPPPPPPPPPPPPPXXXXXXXXXXXXX	GQQQGLPGS(0.013)S(0.13)S(0.857)PK	11	2	-0.17875			7249;7250;7251;7252;7253;7254	7252	60802	59973	59393	62156	59614	62822	63564	65484	64842
tr|A0A0P0UZW5|A0A0P0UZW5_ORYSJ;tr|Q5QNL2|Q5QNL2_ORYSJ	354;380	tr|A0A0P0UZW5|A0A0P0UZW5_ORYSJ	tr|A0A0P0UZW5|A0A0P0UZW5_ORYSJ	>tr|A0A0P0UZW5|A0A0P0UZW5_ORYSJ DNA polymerase delta subunit 3 (Fragment) OS=Oryza sativa subsp. japonica OX=39947 GN=Os01g0204000 PE=4 SV=1;>tr|Q5QNL2|Q5QNL2_ORYSJ DNA polymerase delta subunit 3 OS=Oryza sativa subsp. japonica OX=39947 GN=Os01g0204000 PE=	0.98934	0.0455935	31.792	1	S	QEVEKDVKCCIGRTESPECKTKSSNTVSHSG	X;X;X;X;X;X;X;X;X;X;X;X;X;X;X;Phospho (STY);X;X;X;X;X;X;X;X;X;X;X;X;X;X;X	XXXXXXXXXXXXXPPPPPPPXXXXXXXXXXX	T(0.011)ES(0.989)PECK	3	2	-3.1722			16705	16705	8711.7	8348.2	7943.1	8910.9	8537.8	9323.4	9141.3	8809.9	8999
tr|A0A0P0V159|A0A0P0V159_ORYSJ	410	tr|A0A0P0V159|A0A0P0V159_ORYSJ	tr|A0A0P0V159|A0A0P0V159_ORYSJ	>tr|A0A0P0V159|A0A0P0V159_ORYSJ Os01g0289600 protein OS=Oryza sativa subsp. japonica OX=39947 GN=Os01g0289600 PE=3 SV=1	0.689981	0.00172769	61.597	1	S	ASGSPPRLATQSCTTSN______________	X;X;X;X;X;X;X;X;X;X;X;X;X;X;X;Phospho (STY);X;X;X;X;X;X;X;X;X;X;X;X;X;X;X	XXXXXXXPPPPPPPPPPXXXXXXXXXXXXXX	LATQSCT(0.048)T(0.262)S(0.69)N	9	2	-0.41005			9822;9823	9823	18365	18352	18977	18474	16402	19757	18059	18749	19475
tr|A0A0P0V2Y7|A0A0P0V2Y7_ORYSJ	113	tr|A0A0P0V2Y7|A0A0P0V2Y7_ORYSJ	tr|A0A0P0V2Y7|A0A0P0V2Y7_ORYSJ	>tr|A0A0P0V2Y7|A0A0P0V2Y7_ORYSJ Os01g0500500 protein OS=Oryza sativa subsp. japonica OX=39947 GN=Os01g0500500 PE=4 SV=1	0.306132	0.00394721	25.357		S	PPPPFLDFSHATLQRSSSTPNIPMPDPKAAT	X;X;X;X;X;X;X;X;X;X;X;X;X;X;X;Phospho (STY);X;X;X;X;X;X;X;X;X;X;X;X;X;X;X	XXXXXXXXXXXXXXXPPPPPPPPPPPPPXXX	S(0.306)S(0.306)S(0.306)T(0.082)PNIPMPDPK	1	3	0.13267				15960	0	0	0	0	0	0	0	0	0
tr|A0A0P0V2Y7|A0A0P0V2Y7_ORYSJ	114	tr|A0A0P0V2Y7|A0A0P0V2Y7_ORYSJ	tr|A0A0P0V2Y7|A0A0P0V2Y7_ORYSJ	>tr|A0A0P0V2Y7|A0A0P0V2Y7_ORYSJ Os01g0500500 protein OS=Oryza sativa subsp. japonica OX=39947 GN=Os01g0500500 PE=4 SV=1	0.306132	0.00394721	25.357		S	PPPFLDFSHATLQRSSSTPNIPMPDPKAATK	X;X;X;X;X;X;X;X;X;X;X;X;X;X;X;X;X;X;X;X;X;X;X;X;X;X;X;X;X;X;X	XXXXXXXXXXXXXXXXXXXXXXXXXXXXXXX	S(0.306)S(0.306)S(0.306)T(0.082)PNIPMPDPK	2	3	0.13267				15960	0	0	0	0	0	0	0	0	0
tr|A0A0P0V2Y7|A0A0P0V2Y7_ORYSJ	115	tr|A0A0P0V2Y7|A0A0P0V2Y7_ORYSJ	tr|A0A0P0V2Y7|A0A0P0V2Y7_ORYSJ	>tr|A0A0P0V2Y7|A0A0P0V2Y7_ORYSJ Os01g0500500 protein OS=Oryza sativa subsp. japonica OX=39947 GN=Os01g0500500 PE=4 SV=1	0.663366	8.69e-07	81.102	1	S	PPFLDFSHATLQRSSSTPNIPMPDPKAATKT	X;X;X;X;X;X;X;X;X;X;X;X;X;X;X;Phospho (STY);X;X;X;X;X;X;X;X;X;X;X;X;X;X;X	XXXXXXXXXXXXXPPPPPPPPPPPPPXXXXX	S(0.105)S(0.105)S(0.663)T(0.126)PNIPMPDPK	3	3	-0.17981			15958	15958	4948.7	4779.4	4595.4	4584.1	4646.5	5020.7	6066.5	5808.4	5798.6
tr|A0A0P0V375|A0A0P0V375_ORYSJ	843	tr|A0A0P0V375|A0A0P0V375_ORYSJ	tr|A0A0P0V375|A0A0P0V375_ORYSJ	>tr|A0A0P0V375|A0A0P0V375_ORYSJ AP-3 complex subunit delta OS=Oryza sativa subsp. japonica OX=39947 GN=Os01g0512200 PE=3 SV=1	0.472061	0.00176168	33.232		S	GAVRGVLLGRDLKPSSSQKASDKAYEGIINK	X;X;X;X;X;X;X;X;X;X;X;X;X;X;X;Phospho (STY);X;X;X;X;X;X;X;X;X;X;X;X;X;X;X	XXXXXXXXXXPPPPPPPPPXXXXXXXXXXXX	DLKPS(0.075)S(0.472)S(0.453)QK	6	3	-0.57351				3099	0	0	0	0	0	0	0	0	0
tr|A0A0P0V375|A0A0P0V375_ORYSJ	844	tr|A0A0P0V375|A0A0P0V375_ORYSJ	tr|A0A0P0V375|A0A0P0V375_ORYSJ	>tr|A0A0P0V375|A0A0P0V375_ORYSJ AP-3 complex subunit delta OS=Oryza sativa subsp. japonica OX=39947 GN=Os01g0512200 PE=3 SV=1	0.514778	0.00137636	34.855	1	S	AVRGVLLGRDLKPSSSQKASDKAYEGIINKM	X;X;X;X;X;X;X;X;X;X;X;X;X;X;X;Phospho (STY);X;X;X;X;X;X;X;X;X;X;X;X;X;X;X	XXXXXXXXXPPPPPPPPPXXXXXXXXXXXXX	DLKPS(0.171)S(0.314)S(0.515)QK	7	3	-0.22977			3101	3101	23133	21454	21295	15468	15718	15917	34654	34932	33085
tr|A0A0P0V407|A0A0P0V407_ORYSJ;tr|Q8S9U1|Q8S9U1_ORYSJ	386;565	tr|A0A0P0V407|A0A0P0V407_ORYSJ	tr|A0A0P0V407|A0A0P0V407_ORYSJ	>tr|A0A0P0V407|A0A0P0V407_ORYSJ Os01g0558500 protein (Fragment) OS=Oryza sativa subsp. japonica OX=39947 GN=Os01g0558500 PE=4 SV=1;>tr|Q8S9U1|Q8S9U1_ORYSJ Os01g0558500 protein OS=Oryza sativa subsp. japonica OX=39947 GN=Os01g0558500 PE=4 SV=1	0.544253	1.89e-09	71.569	1	S	SETISNRSQSEKGAPSSPYYEPLQVIPPEQK	X;X;X;X;X;X;X;X;X;X;X;X;X;X;X;Phospho (STY);X;X;X;X;X;X;X;X;X;X;X;X;X;X;X	XXXXXXXXXXXXPPPPPPPPPPPPPPPPPPP	GAPS(0.544)S(0.454)PY(0.002)YEPLQVIPPEQK	4	3	0.41559			5965;5966	5965	4580.6	4071.2	4231.7	5674.5	4368.4	5537.3	4626.1	5186.9	5403.5
tr|A0A0P0V407|A0A0P0V407_ORYSJ;tr|Q8S9U1|Q8S9U1_ORYSJ	387;566	tr|A0A0P0V407|A0A0P0V407_ORYSJ	tr|A0A0P0V407|A0A0P0V407_ORYSJ	>tr|A0A0P0V407|A0A0P0V407_ORYSJ Os01g0558500 protein (Fragment) OS=Oryza sativa subsp. japonica OX=39947 GN=Os01g0558500 PE=4 SV=1;>tr|Q8S9U1|Q8S9U1_ORYSJ Os01g0558500 protein OS=Oryza sativa subsp. japonica OX=39947 GN=Os01g0558500 PE=4 SV=1	0.818355	1.8e-16	104.29	1	S	ETISNRSQSEKGAPSSPYYEPLQVIPPEQKS	X;X;X;X;X;X;X;X;X;X;X;X;X;X;X;Phospho (STY);X;X;X;X;X;X;X;X;X;X;X;X;X;X;X	XXXXXXXXXXXPPPPPPPPPPPPPPPPPPPX	GAPS(0.182)S(0.818)PYYEPLQVIPPEQK	5	3	-0.08301			5962;5963	5962	7329.4	7493.8	6834.4	7183.3	7749.7	9195.6	7202.7	7413.8	7636.7
tr|A0A0P0V407|A0A0P0V407_ORYSJ;tr|Q8S9U1|Q8S9U1_ORYSJ	546;725	tr|A0A0P0V407|A0A0P0V407_ORYSJ	tr|A0A0P0V407|A0A0P0V407_ORYSJ	>tr|A0A0P0V407|A0A0P0V407_ORYSJ Os01g0558500 protein (Fragment) OS=Oryza sativa subsp. japonica OX=39947 GN=Os01g0558500 PE=4 SV=1;>tr|Q8S9U1|Q8S9U1_ORYSJ Os01g0558500 protein OS=Oryza sativa subsp. japonica OX=39947 GN=Os01g0558500 PE=4 SV=1	0.860278	0.00394008	33.05	1	S	TKKSATSPRKMRRLSSFASSRRDGASRKPVV	X;X;X;X;X;X;X;X;X;X;X;X;X;X;X;Phospho (STY);X;X;X;X;X;X;X;X;X;X;X;X;X;X;X	XXXXXXXXXXXXXPPPPPPPPXXXXXXXXXX	LS(0.033)S(0.86)FAS(0.105)S(0.001)R	3	2	0.30174			10979;10980;10981	10980	27911	27760	27735	33487	30804	35512	29221	29804	31664
tr|A0A0P0V4A6|A0A0P0V4A6_ORYSJ	75	tr|A0A0P0V4A6|A0A0P0V4A6_ORYSJ	tr|A0A0P0V4A6|A0A0P0V4A6_ORYSJ	>tr|A0A0P0V4A6|A0A0P0V4A6_ORYSJ Os01g0571166 protein OS=Oryza sativa subsp. japonica OX=39947 GN=Os01g0571166 PE=4 SV=1	1	0.00231381	33.015	1	S	QDDVKTTIGAILRRGSGVLEKAKEIGGHSEA	X;X;X;X;X;X;X;X;X;X;X;X;X;X;X;Phospho (STY);X;X;X;X;X;X;X;X;X;X;X;X;X;X;X	XXXXXXXXXXXXXPPPPPPPPXXXXXXXXXX	RGS(1)GVLEK	3	3	-1.3597			13491;13492;13493;13494	13494	60214	54925	55564	34753	35633	34664	57900	60180	57622
tr|A0A0P0V4C5|A0A0P0V4C5_ORYSJ	780	tr|A0A0P0V4C5|A0A0P0V4C5_ORYSJ	tr|A0A0P0V4C5|A0A0P0V4C5_ORYSJ	>tr|A0A0P0V4C5|A0A0P0V4C5_ORYSJ Os01g0575500 protein OS=Oryza sativa subsp. japonica OX=39947 GN=Os01g0575500 PE=4 SV=1	0.999998	3.81e-08	109.46	1	S	VATGKGQQPPSYGMASPRALDVSDESQQPAE	X;X;X;X;X;X;X;X;X;X;X;X;X;X;X;Phospho (STY);X;X;X;X;X;X;X;X;X;X;X;X;X;X;X	XXXXXPPPPPPPPPPPPPXXXXXXXXXXXXX	GQQPPSYGMAS(1)PR	11	2	-0.39803			7243;7244;7245;7246;7247;7248	7244	46976	46153	43936	37133	36917	37770	42433	41601	42984
tr|A0A0P0V4C5|A0A0P0V4C5_ORYSJ	542	tr|A0A0P0V4C5|A0A0P0V4C5_ORYSJ	tr|A0A0P0V4C5|A0A0P0V4C5_ORYSJ	>tr|A0A0P0V4C5|A0A0P0V4C5_ORYSJ Os01g0575500 protein OS=Oryza sativa subsp. japonica OX=39947 GN=Os01g0575500 PE=4 SV=1	0.999977	0.00486012	32.231	1	S	PSIPTIGGGPKVESLSPRERAAERERMVLDI	X;X;X;X;X;X;X;X;X;X;X;X;X;X;X;Phospho (STY);X;X;X;X;X;X;X;X;X;X;X;X;X;X;X	XXXXXXXXXXXPPPPPPPXXXXXXXXXXXXX	VESLS(1)PR	5	2	-0.2626			18197;18198;18199	18197	19295	20322	17905	14994	16001	16630	21074	22355	22994
tr|A0A0P0V4X3|A0A0P0V4X3_ORYSJ	454	tr|A0A0P0V4X3|A0A0P0V4X3_ORYSJ	tr|A0A0P0V4X3|A0A0P0V4X3_ORYSJ	>tr|A0A0P0V4X3|A0A0P0V4X3_ORYSJ Serine/threonine-protein phosphatase 2A 55 kDa regulatory subunit B OS=Oryza sativa subsp. japonica OX=39947 GN=Os01g0600200 PE=3 SV=1	0.892147	0.0265157	25.608	1	S	TRRQLQNPTRPARSLSTLTRVVRRGAESTGI	X;X;X;X;X;X;X;X;X;X;X;X;X;X;X;Phospho (STY);X;X;X;X;X;X;X;X;X;X;X;X;X;X;X	XXXXXXXXXXXXXPPPPPPPXXXXXXXXXXX	S(0.008)LS(0.892)T(0.1)LTR	3	2	0.91201			15241;15242;15243	15243	29004	30112	28103	21140	21231	21298	32741	33074	34188
tr|A0A0P0V5C3|A0A0P0V5C3_ORYSJ	360	tr|A0A0P0V5C3|A0A0P0V5C3_ORYSJ	tr|A0A0P0V5C3|A0A0P0V5C3_ORYSJ	>tr|A0A0P0V5C3|A0A0P0V5C3_ORYSJ Os01g0621300 protein OS=Oryza sativa subsp. japonica OX=39947 GN=Os01g0621300 PE=4 SV=1	0.980049	0.00375602	51.639	1	S	GSSRSIQLKTDGLLLSPSRSGDIESPKDILC	X;X;X;X;X;X;X;X;X;X;X;X;X;X;X;Phospho (STY);X;X;X;X;X;X;X;X;X;X;X;X;X;X;X	XXXXXXXXXPPPPPPPPPPXXXXXXXXXXXX	TDGLLLS(0.98)PS(0.02)R	7	2	2.6752			16600;16601;16602	16601	24229	24046	23110	25724	24994	25713	28520	29410	28500
tr|A0A0P0V5C3|A0A0P0V5C3_ORYSJ	276	tr|A0A0P0V5C3|A0A0P0V5C3_ORYSJ	tr|A0A0P0V5C3|A0A0P0V5C3_ORYSJ	>tr|A0A0P0V5C3|A0A0P0V5C3_ORYSJ Os01g0621300 protein OS=Oryza sativa subsp. japonica OX=39947 GN=Os01g0621300 PE=4 SV=1	0.964431	5.2e-05	50.649	1;2	S	SQIVSLKREEKVIPFSPSASFCVPKIEQGSN	X;X;X;X;X;X;X;X;X;X;X;X;X;X;X;Phospho (STY);X;X;X;Phospho (STY);X;X;X;X;X;X;X;X;X;X;X	XXXXXXXXXXXPPPPPPPPPPPPPPXXXXXX	VIPFS(0.964)PS(0.035)AS(0.001)FCVPK	5	3	-1.5929			18493;18494;18495	18494	3141.3	2955.8	3250.9	3530.7	3325.4	3202.4	3555.2	4148.1	3869.2
tr|A0A0P0V5C3|A0A0P0V5C3_ORYSJ	280	tr|A0A0P0V5C3|A0A0P0V5C3_ORYSJ	tr|A0A0P0V5C3|A0A0P0V5C3_ORYSJ	>tr|A0A0P0V5C3|A0A0P0V5C3_ORYSJ Os01g0621300 protein OS=Oryza sativa subsp. japonica OX=39947 GN=Os01g0621300 PE=4 SV=1	0.830458	0.000248986	50.16	2	S	SLKREEKVIPFSPSASFCVPKIEQGSNDQTR	X;X;X;X;X;X;X;X;X;X;X;Phospho (STY);X;X;X;Phospho (STY);X;X;X;X;X;X;X;X;X;X;X;X;X;X;X	XXXXXXXPPPPPPPPPPPPPPXXXXXXXXXX	VIPFS(0.962)PS(0.208)AS(0.83)FCVPK	9	3	-0.10801			18495	18495	407.17	289.11	412.71	540.2	266.14	355.49	537.5	708.85	501.18
tr|A0A0P0V5R2|A0A0P0V5R2_ORYSJ	230	tr|A0A0P0V5R2|A0A0P0V5R2_ORYSJ	tr|A0A0P0V5R2|A0A0P0V5R2_ORYSJ	>tr|A0A0P0V5R2|A0A0P0V5R2_ORYSJ CASP-like protein OS=Oryza sativa subsp. japonica OX=39947 GN=Os01g0640700 PE=3 SV=1	0.698663	1.58e-12	76.499	1;2	S	TAIAIPFNPAEEAMTSPLRIGNGKAARLDHQ	X;X;X;X;X;X;X;X;X;X;X;X;X;X;X;Phospho (STY);X;X;X;X;X;X;X;X;X;X;X;X;X;X;X	PPPPPPPPPPPPPPPPPPPXXXXXXXXXXXX	EALKPPAT(0.957)PVAT(0.043)AIAIPFNPAEEAMT(0.301)S(0.699)PLR	27	4	0.7303			3696;3698;3699	3696	1013.4	1362.3	935.75	1437.2	1130.4	1028.1	1222	1234.9	1178.9
tr|A0A0P0V5R2|A0A0P0V5R2_ORYSJ	195	tr|A0A0P0V5R2|A0A0P0V5R2_ORYSJ	tr|A0A0P0V5R2|A0A0P0V5R2_ORYSJ	>tr|A0A0P0V5R2|A0A0P0V5R2_ORYSJ CASP-like protein OS=Oryza sativa subsp. japonica OX=39947 GN=Os01g0640700 PE=3 SV=1	0.957946	0.0018368	44.654	2	S	PATTAPAPTPTAKSKSGQNTPKHKEALKPPA	X;X;X;X;X;X;X;X;X;X;X;X;X;X;X;Phospho (STY);X;X;X;Phospho (STY);X;X;X;X;X;X;X;X;X;X;X	XXXXXXXXXXXXXPPPPPPPPPXXXXXXXXX	S(0.042)KS(0.958)GQNT(1)PK	3	3	0.743			15053;15054;15055;15056	15053	45628	43463	44118	52962	50428	53937	48176	48164	49412
tr|A0A0P0V6I7|A0A0P0V6I7_ORYSJ;tr|Q5QM91|Q5QM91_ORYSJ	176;226	tr|A0A0P0V6I7|A0A0P0V6I7_ORYSJ	tr|A0A0P0V6I7|A0A0P0V6I7_ORYSJ	>tr|A0A0P0V6I7|A0A0P0V6I7_ORYSJ RNA polymerase III subunit C3 (Fragment) OS=Oryza sativa subsp. japonica OX=39947 GN=Os01g0679000 PE=4 SV=1;>tr|Q5QM91|Q5QM91_ORYSJ RNA polymerase III subunit C3 OS=Oryza sativa subsp. japonica OX=39947 GN=Os01g0679000 PE=2	0.999892	1.86e-19	161.14	1	S	SEIPYIMEDASNANDSPRSSISGAKRKHNAL	X;X;X;X;X;X;X;X;X;X;X;X;X;X;X;Phospho (STY);X;X;X;X;X;X;X;X;X;X;X;X;X;X;X	PPPPPPPPPPPPPPPPPPXXXXXXXXXXXXX	FSEIPYIMEDASNANDS(1)PR	17	3	0.20701			5730;5731;5732	5730	3500.6	3283.7	2952.5	3140.9	2809.1	2892.9	3012.6	3534.9	3328
tr|A0A0P0V6W9|A0A0P0V6W9_ORYSJ;tr|Q5N7Q8|Q5N7Q8_ORYSJ;tr|Q5N7Q7|Q5N7Q7_ORYSJ	404;674;678	tr|A0A0P0V6W9|A0A0P0V6W9_ORYSJ	tr|A0A0P0V6W9|A0A0P0V6W9_ORYSJ	>tr|A0A0P0V6W9|A0A0P0V6W9_ORYSJ Os01g0689900 protein (Fragment) OS=Oryza sativa subsp. japonica OX=39947 GN=Os01g0689900 PE=3 SV=1;>tr|Q5N7Q8|Q5N7Q8_ORYSJ Os01g0689900 protein OS=Oryza sativa subsp. japonica OX=39947 GN=Os01g0689900 PE=4 SV=1;>tr|Q5N7Q7|Q5	0.998302	1.29e-07	49.073	1	S	EKDGGKDKKGPDPPLSPDTVHAQWDSRQTTP	X;X;X;X;X;X;X;X;X;X;X;X;X;X;X;Phospho (STY);X;X;X;X;X;X;X;X;X;X;X;X;X;X;X	XXXXXXXXXPPPPPPPPPPPPPPPPPPXXXX	GPDPPLS(0.998)PDT(0.002)VHAQWDSR	7	3	0.73937			7109;7110	7109	6983.3	6245	5640.6	6594.5	6437.3	6262.3	6635.8	6664.8	6943.5
tr|A0A0P0V760|A0A0P0V760_ORYSJ;tr|Q5N8E9|Q5N8E9_ORYSJ;tr|Q5N8F0|Q5N8F0_ORYSJ	357;507;582	tr|A0A0P0V760|A0A0P0V760_ORYSJ	tr|A0A0P0V760|A0A0P0V760_ORYSJ	>tr|A0A0P0V760|A0A0P0V760_ORYSJ Os01g0706400 protein (Fragment) OS=Oryza sativa subsp. japonica OX=39947 GN=Os01g0706400 PE=4 SV=1;>tr|Q5N8E9|Q5N8E9_ORYSJ Os01g0706400 protein OS=Oryza sativa subsp. japonica OX=39947 GN=Os01g0706400 PE=3 SV=1;>tr|Q5N8F0|Q5	0.942604	4.15e-16	87.338	1	S	KAGPDSSAVVFDQYDSDVGEENLLDPFSSKH	X;X;X;X;X;X;X;X;X;X;X;X;X;X;X;Phospho (STY);X;X;X;X;X;X;X;X;X;X;X;X;X;X;X	XPPPPPPPPPPPPPPPPPPPPPPPPPPPPPX	AGPDSSAVVFDQY(0.057)DS(0.943)DVGEENLLDPFSSK	15	3	1.3244			777;778;779;780;781;782;783;784;785;786	782	7165.1	6617.4	6683.7	8917.5	8442.8	9375.4	8018.4	8284.7	6989.6
tr|A0A0P0V760|A0A0P0V760_ORYSJ;tr|Q5N8E9|Q5N8E9_ORYSJ;tr|Q5N8F0|Q5N8F0_ORYSJ	61;211;286	tr|A0A0P0V760|A0A0P0V760_ORYSJ	tr|A0A0P0V760|A0A0P0V760_ORYSJ	>tr|A0A0P0V760|A0A0P0V760_ORYSJ Os01g0706400 protein (Fragment) OS=Oryza sativa subsp. japonica OX=39947 GN=Os01g0706400 PE=4 SV=1;>tr|Q5N8E9|Q5N8E9_ORYSJ Os01g0706400 protein OS=Oryza sativa subsp. japonica OX=39947 GN=Os01g0706400 PE=3 SV=1;>tr|Q5N8F0|Q5	1	0.000330589	71.502	1	S	NAFPQENRRGSDAPMSPRSQHGPNSFSHDTA	X;X;X;X;X;X;X;X;X;X;X;X;X;X;X;Phospho (STY);X;X;X;X;X;X;X;X;X;X;X;X;X;X;X	XXXXXXXXPPPPPPPPPPXXXXXXXXXXXXX	RGSDAPMS(1)PR	8	2	-0.95144			7335;7336;7337;13488;13489;13490	13490	41088	43127	36624	43558	38044	42601	40578	38940	39768
tr|A0A0P0V760|A0A0P0V760_ORYSJ;tr|Q5N8E9|Q5N8E9_ORYSJ;tr|Q5N8F0|Q5N8F0_ORYSJ	508;658;733	tr|A0A0P0V760|A0A0P0V760_ORYSJ	tr|A0A0P0V760|A0A0P0V760_ORYSJ	>tr|A0A0P0V760|A0A0P0V760_ORYSJ Os01g0706400 protein (Fragment) OS=Oryza sativa subsp. japonica OX=39947 GN=Os01g0706400 PE=4 SV=1;>tr|Q5N8E9|Q5N8E9_ORYSJ Os01g0706400 protein OS=Oryza sativa subsp. japonica OX=39947 GN=Os01g0706400 PE=3 SV=1;>tr|Q5N8F0|Q5	0.895698	0.0271931	45.262	1	S	SSGSNAFNKERYSESSPRSDYSWVDGELDRT	X;X;X;X;X;X;X;X;X;X;X;X;X;X;X;Phospho (STY);X;X;X;X;X;X;X;X;X;X;X;X;X;X;X	XXXXXXXXXXXPPPPPPPXXXXXXXXXXXXX	YS(0.001)ES(0.103)S(0.896)PR	5	2	0.47471			20082	20082	6318.5	6680.8	5926.6	6224.3	6175.5	6128.8	5623.2	5524.6	5431.4
tr|A0A0P0V7D5|A0A0P0V7D5_ORYSJ;tr|Q0JJU2|Q0JJU2_ORYSJ;tr|A0A0N7KL55|A0A0N7KL55_ORYSJ	140;140;10	tr|A0A0P0V7D5|A0A0P0V7D5_ORYSJ	tr|A0A0P0V7D5|A0A0P0V7D5_ORYSJ	>tr|A0A0P0V7D5|A0A0P0V7D5_ORYSJ Os01g0716800 protein (Fragment) OS=Oryza sativa subsp. japonica OX=39947 GN=Os01g0716800 PE=4 SV=1;>tr|Q0JJU2|Q0JJU2_ORYSJ Os01g0716800 protein OS=Oryza sativa subsp. japonica OX=39947 GN=Os01g0716800 PE=3 SV=1;>tr|A0A0N7KL5	0.963981	0.0172846	30.95	1	S	SQMEGAPYKLNRRRKSETLRAQYIDIKELRV	X;X;X;X;X;X;X;X;X;X;X;X;X;X;X;Phospho (STY);X;X;X;X;X;X;X;X;X;X;X;X;X;X;X	XXXXXXXXXXXXXPPPPPPPXXXXXXXXXXX	RKS(0.964)ET(0.036)LR	3	3	-0.4582			13541;13542	13541	14033	13564	13218	12745	12795	13324	14450	13596	13128
tr|A0A0P0V7D5|A0A0P0V7D5_ORYSJ;tr|Q0JJU2|Q0JJU2_ORYSJ	318;318	tr|A0A0P0V7D5|A0A0P0V7D5_ORYSJ	tr|A0A0P0V7D5|A0A0P0V7D5_ORYSJ	>tr|A0A0P0V7D5|A0A0P0V7D5_ORYSJ Os01g0716800 protein (Fragment) OS=Oryza sativa subsp. japonica OX=39947 GN=Os01g0716800 PE=4 SV=1;>tr|Q0JJU2|Q0JJU2_ORYSJ Os01g0716800 protein OS=Oryza sativa subsp. japonica OX=39947 GN=Os01g0716800 PE=3 SV=1	0.972413	2.1e-08	59.202	1	S	SRVPSMKIFDRSHNLSFKDYVSSLEEPIHQK	X;X;X;X;X;X;X;X;X;X;X;X;X;X;X;Phospho (STY);X;X;X;X;X;X;X;X;X;X;X;X;X;X;X	XXXXXXXXXXXPPPPPPPPPPPPPPPPPPPP	S(0.026)HNLS(0.972)FKDY(0.001)VSSLEEPIHQK	5	5	0.0046895			14886;14887;14888	14887	8353	9247.9	8309.5	8679.3	8580	8736.7	8732.6	8614.1	8977.6
tr|A0A0P0V7L5|A0A0P0V7L5_ORYSJ;tr|Q8GU81|Q8GU81_ORYSJ	16;605	tr|A0A0P0V7L5|A0A0P0V7L5_ORYSJ	tr|A0A0P0V7L5|A0A0P0V7L5_ORYSJ	>tr|A0A0P0V7L5|A0A0P0V7L5_ORYSJ Os01g0723800 protein (Fragment) OS=Oryza sativa subsp. japonica OX=39947 GN=Os01g0723800 PE=4 SV=1;>tr|Q8GU81|Q8GU81_ORYSJ MDR-like ABC transporter OS=Oryza sativa subsp. japonica OX=39947 GN=mdr17 PE=4 SV=1	0.999991	1.15e-08	97.129	1	S	KGGPYSRLVKLQKMVSYIDQEGGDQFRASSV	X;X;X;X;X;X;X;X;X;X;X;X;X;X;X;Phospho (STY);X;X;X;X;X;X;X;X;X;X;X;X;X;X;X	XXXXXXXXXXXXXPPPPPPPPPPPPPPXXXX	MVS(1)YIDQEGGDQFR	3	2	0.49216			11872;11873;11874;11875;11876	11876	16429	16190	15859	14644	14722	14182	17937	18429	18405
tr|A0A0P0V7V7|A0A0P0V7V7_ORYSJ;tr|Q65XC8|Q65XC8_ORYSJ	23;31	tr|A0A0P0V7V7|A0A0P0V7V7_ORYSJ	tr|A0A0P0V7V7|A0A0P0V7V7_ORYSJ	>tr|A0A0P0V7V7|A0A0P0V7V7_ORYSJ Os01g0734200 protein OS=Oryza sativa subsp. japonica OX=39947 GN=Os01g0734200 PE=4 SV=1;>tr|Q65XC8|Q65XC8_ORYSJ Os05g0528000 protein OS=Oryza sativa subsp. japonica OX=39947 GN=Os05g0528000 PE=3 SV=1	0.6958	0.012466	42.222	1	S	GPQRWGSAGTTPRSLSTGSSPRGSDDRSSDD	X;X;X;X;X;X;X;X;X;X;X;X;X;X;X;Phospho (STY);X;X;X;X;X;X;X;X;X;X;X;X;X;X;X	XXXXXXXXXXXXXPPPPPPPPPXXXXXXXXX	S(0.085)LS(0.696)T(0.213)GS(0.003)S(0.003)PR	3	2	0.046847			15240	15240	8530	8167.5	7827.3	7210.5	7770.6	7996.7	9685.3	10252	9441.6
tr|A0A0P0V8B5|A0A0P0V8B5_ORYSJ;tr|Q8S1X0|Q8S1X0_ORYSJ	971;1064	tr|A0A0P0V8B5|A0A0P0V8B5_ORYSJ	tr|A0A0P0V8B5|A0A0P0V8B5_ORYSJ	>tr|A0A0P0V8B5|A0A0P0V8B5_ORYSJ 1,3-beta-glucan synthase (Fragment) OS=Oryza sativa subsp. japonica OX=39947 GN=Os01g0754200 PE=3 SV=1;>tr|Q8S1X0|Q8S1X0_ORYSJ 1,3-beta-glucan synthase OS=Oryza sativa subsp. japonica OX=39947 GN=Os01g0754200 PE=2 SV=1	0.944912	0.00106679	45.426	1	S	GGLSQRPRRRLERGTSTVSQLFKGQEDGAAI	X;X;X;X;X;X;X;X;X;X;X;X;X;X;X;Phospho (STY);X;X;X;X;X;X;X;X;X;X;X;X;X;X;X	XXXXXXXXXXXXXPPPPPPPPPPXXXXXXXX	GT(0.002)S(0.945)T(0.052)VS(0.001)QLFK	3	2	-0.32582			7506;7507	7506	16089	17898	15519	13799	12507	13853	14103	16088	15225
tr|A0A0P0V8F6|A0A0P0V8F6_ORYSJ;tr|Q5JLQ6|Q5JLQ6_ORYSJ	79;79	tr|A0A0P0V8F6|A0A0P0V8F6_ORYSJ	tr|A0A0P0V8F6|A0A0P0V8F6_ORYSJ	>tr|A0A0P0V8F6|A0A0P0V8F6_ORYSJ Os01g0759700 protein OS=Oryza sativa subsp. japonica OX=39947 GN=Os01g0759700 PE=4 SV=1;>tr|Q5JLQ6|Q5JLQ6_ORYSJ Os01g0759700 protein OS=Oryza sativa subsp. japonica OX=39947 GN=Os01g0759700 PE=2 SV=1	0.975244	5.78e-12	84.887	2	S	SPPLAEDPAGRRTLASPYPSPGLPPLPSRRS	X;X;X;X;X;X;X;X;X;X;X;X;X;X;X;Phospho (STY);X;X;X;Phospho (STY);X;X;X;X;X;X;X;X;X;X;X	XXXXXXXXXXXXPPPPPPPPPPPPPPPPPXX	T(0.033)LAS(0.975)PY(0.001)PS(0.985)PGLPPLPS(0.007)R	4	2	0.017478			17046;17047;17048;17049;17050;17051;17052	17052	10243	11826	10154	11797	9836	11257	9834.2	9836	10261
tr|A0A0P0V8F6|A0A0P0V8F6_ORYSJ;tr|Q5JLQ6|Q5JLQ6_ORYSJ	83;83	tr|A0A0P0V8F6|A0A0P0V8F6_ORYSJ	tr|A0A0P0V8F6|A0A0P0V8F6_ORYSJ	>tr|A0A0P0V8F6|A0A0P0V8F6_ORYSJ Os01g0759700 protein OS=Oryza sativa subsp. japonica OX=39947 GN=Os01g0759700 PE=4 SV=1;>tr|Q5JLQ6|Q5JLQ6_ORYSJ Os01g0759700 protein OS=Oryza sativa subsp. japonica OX=39947 GN=Os01g0759700 PE=2 SV=1	0.998101	5.78e-12	84.887	1;2	S	AEDPAGRRTLASPYPSPGLPPLPSRRSSSPF	X;X;X;X;X;X;X;X;X;X;X;Phospho (STY);X;X;X;Phospho (STY);X;X;X;X;X;X;X;X;X;X;X;X;X;X;X	XXXXXXXXPPPPPPPPPPPPPPPPPXXXXXX	T(0.498)LAS(0.504)PYPS(0.998)PGLPPLPSR	8	2	-0.82299			17046;17047;17048;17049;17050;17051;17052;17053	17047	11679	13706	11718	13578	11413	13506	11551	11610	12075
tr|A0A0P0V8R9|A0A0P0V8R9_ORYSJ;tr|Q94EF2|Q94EF2_ORYSJ	48;52	tr|A0A0P0V8R9|A0A0P0V8R9_ORYSJ	tr|A0A0P0V8R9|A0A0P0V8R9_ORYSJ	>tr|A0A0P0V8R9|A0A0P0V8R9_ORYSJ Diacylglycerol O-acyltransferase OS=Oryza sativa subsp. japonica OX=39947 GN=Os01g0770100 PE=4 SV=1;>tr|Q94EF2|Q94EF2_ORYSJ Diacylglycerol O-acyltransferase OS=Oryza sativa subsp. japonica OX=39947 GN=Os01g0770000 PE=2 SV=1	0.983925	3.83e-13	108.54	1	S	GGGKGAAAATPPEPVSPSARLLEDFFIVVVI	X;X;X;X;X;X;X;X;X;X;X;X;X;X;X;Phospho (STY);X;X;X;X;X;X;X;X;X;X;X;X;X;X;X	XXXXPPPPPPPPPPPPPPPPXXXXXXXXXXX	GAAAATPPEPVS(0.984)PS(0.016)AR	12	2	0.1341			5888;5889;5890;5891	5891	23311	23299	22116	23423	22328	23058	25895	25967	26921
tr|A0A0P0V8S9|A0A0P0V8S9_ORYSJ	466	tr|A0A0P0V8S9|A0A0P0V8S9_ORYSJ	tr|A0A0P0V8S9|A0A0P0V8S9_ORYSJ	>tr|A0A0P0V8S9|A0A0P0V8S9_ORYSJ Os01g0775100 protein (Fragment) OS=Oryza sativa subsp. japonica OX=39947 GN=Os01g0775100 PE=4 SV=1	0.89881	5.91e-09	82.827	1	S	TDFCSANPKGLGDSSSPQDFNVEKELNNSQY	X;X;X;X;X;X;X;X;X;X;X;X;X;X;X;Phospho (STY);X;X;X;X;X;X;X;X;X;X;X;X;X;X;X	XXXXXXXXXPPPPPPPPPPPPPPPXXXXXXX	GLGDS(0.015)S(0.086)S(0.899)PQDFNVEK	7	3	-0.26993			6958;6959;6960	6958	10866	10616	11435	14951	14600	16008	16044	16535	16942
tr|A0A0P0V8T8|A0A0P0V8T8_ORYSJ	139	tr|A0A0P0V8T8|A0A0P0V8T8_ORYSJ	tr|A0A0P0V8T8|A0A0P0V8T8_ORYSJ	>tr|A0A0P0V8T8|A0A0P0V8T8_ORYSJ Os01g0776400 protein OS=Oryza sativa subsp. japonica OX=39947 GN=Os01g0776400 PE=4 SV=1	0.830099	0.0125279	22.262	1	S	SKDLRRNSGPLLRNLSISSKQSDPERHVRFA	X;X;X;X;X;X;X;X;X;X;X;X;X;X;X;Phospho (STY);X;X;X;X;X;X;X;X;X;X;X;X;X;X;X	XXXXXXXXXXXXXPPPPPPPXXXXXXXXXXX	NLS(0.83)IS(0.14)S(0.03)K	3	2	-1.113			12249	12249	13341	12294	12228	11253	11275	12112	13390	12472	13897
tr|A0A0P0V8W3|A0A0P0V8W3_ORYSJ	628	tr|A0A0P0V8W3|A0A0P0V8W3_ORYSJ	tr|A0A0P0V8W3|A0A0P0V8W3_ORYSJ	>tr|A0A0P0V8W3|A0A0P0V8W3_ORYSJ Conserved oligomeric Golgi complex subunit 1 OS=Oryza sativa subsp. japonica OX=39947 GN=Os01g0777000 PE=3 SV=1	0.86177	0.019211	8.5849	1	S	QWVKEAGGAAFMRLSSPSPRHSRASFDTAMP	X;X;X;X;X;X;X;X;X;X;X;X;X;X;X;Phospho (STY);X;X;X;X;X;X;X;X;X;X;X;X;X;X;X	XXXXXXXXXXXXXPPPPPPPXXXXXXXXXXX	LS(0.019)S(0.862)PS(0.119)PR	3	2	0.36726			10991	10991	6752.3	6321.9	5964.7	5173	5923.9	6112.9	7473	7434.9	8023.1
tr|A0A0P0V9H2|A0A0P0V9H2_ORYSJ	322	tr|A0A0P0V9H2|A0A0P0V9H2_ORYSJ	tr|A0A0P0V9H2|A0A0P0V9H2_ORYSJ	>tr|A0A0P0V9H2|A0A0P0V9H2_ORYSJ Os01g0812050 protein OS=Oryza sativa subsp. japonica OX=39947 GN=Os01g0812050 PE=4 SV=1	0.500004	2.28e-07	64.224	1	S	RINTSKGFEDNLLDSSLGSPWARVGSEDGVG	X;X;X;X;X;X;X;X;X;X;X;X;X;X;X;Phospho (STY);X;X;X;X;X;X;X;X;X;X;X;X;X;X;X	XXXXXXPPPPPPPPPPPPPPPPPXXXXXXXX	GFEDNLLDS(0.159)S(0.5)LGS(0.341)PWAR	10	3	-0.63303			6235;6236	6236	2612.1	2185.6	2510.3	2696.9	2577.5	2531.9	2285	2075.9	2358.9
tr|A0A0P0V9H2|A0A0P0V9H2_ORYSJ	325	tr|A0A0P0V9H2|A0A0P0V9H2_ORYSJ	tr|A0A0P0V9H2|A0A0P0V9H2_ORYSJ	>tr|A0A0P0V9H2|A0A0P0V9H2_ORYSJ Os01g0812050 protein OS=Oryza sativa subsp. japonica OX=39947 GN=Os01g0812050 PE=4 SV=1	0.510475	0.000149779	40.972	1	S	TSKGFEDNLLDSSLGSPWARVGSEDGVGSDD	X;X;X;X;X;X;X;X;X;X;X;X;X;X;X;Phospho (STY);X;X;X;X;X;X;X;X;X;X;X;X;X;X;X	XXXPPPPPPPPPPPPPPPPPXXXXXXXXXXX	GFEDNLLDS(0.143)S(0.346)LGS(0.51)PWAR	13	3	-0.87306			6234	6234	1850.2	1962.4	1062.1	1662.9	1879.8	2027.2	1635.8	1965.9	1492.6
tr|A0A0P0VA26|A0A0P0VA26_ORYSJ	247	tr|A0A0P0VA26|A0A0P0VA26_ORYSJ	tr|A0A0P0VA26|A0A0P0VA26_ORYSJ	>tr|A0A0P0VA26|A0A0P0VA26_ORYSJ Os01g0835000 protein OS=Oryza sativa subsp. japonica OX=39947 GN=Os01g0835000 PE=4 SV=1	0.453021	0.00721765	32.478		S	ESLLAADDERENSKGSDSPTMEGKPKGSPFS	X;X;X;X;X;X;X;X;X;X;X;X;X;X;X;Phospho (STY);X;X;X;X;X;X;X;X;X;X;X;X;X;X;X	XXXXXXXXXXXXXXPPPPPPPPPPPPXXXXX	GS(0.453)DS(0.338)PT(0.209)MEGKPK	2	3	0.13479				7339	0	0	0	0	0	0	0	0	0
tr|A0A0P0VA26|A0A0P0VA26_ORYSJ	249	tr|A0A0P0VA26|A0A0P0VA26_ORYSJ	tr|A0A0P0VA26|A0A0P0VA26_ORYSJ	>tr|A0A0P0VA26|A0A0P0VA26_ORYSJ Os01g0835000 protein OS=Oryza sativa subsp. japonica OX=39947 GN=Os01g0835000 PE=4 SV=1	0.747292	5.01e-05	67.576	1	S	LLAADDERENSKGSDSPTMEGKPKGSPFSSE	X;X;X;X;X;X;X;X;X;X;X;X;X;X;X;Phospho (STY);X;X;X;X;X;X;X;X;X;X;X;X;X;X;X	XXXXXXXXXXXXPPPPPPPPPPPPXXXXXXX	GS(0.046)DS(0.747)PT(0.207)MEGKPK	4	3	0.17626			7338;7340	7338	24559	24310	25160	23972	22733	24099	26037	26705	27478
tr|A0A0P0VA70|A0A0P0VA70_ORYSJ;tr|A0A0P0VA82|A0A0P0VA82_ORYSJ;tr|Q0JHT2|Q0JHT2_ORYSJ	335;313;335	tr|A0A0P0VA70|A0A0P0VA70_ORYSJ	tr|A0A0P0VA70|A0A0P0VA70_ORYSJ	>tr|A0A0P0VA70|A0A0P0VA70_ORYSJ Os01g0844800 protein (Fragment) OS=Oryza sativa subsp. japonica OX=39947 GN=Os01g0844800 PE=4 SV=1;>tr|A0A0P0VA82|A0A0P0VA82_ORYSJ Os01g0844800 protein (Fragment) OS=Oryza sativa subsp. japonica OX=39947 GN=Os01g0844800 PE=4	0.714614	0.000342501	46.493	1	S	GVRINSNEKKLNCSSSFNTASSKAVEPDDIL	X;X;X;X;X;X;X;X;X;X;X;X;X;X;X;Phospho (STY);X;X;X;X;X;X;X;X;X;X;X;X;X;X;X	XXXXXXXXXPPPPPPPPPPPPPPXXXXXXXX	KLNCS(0.048)S(0.211)S(0.715)FNT(0.024)AS(0.001)S(0.001)K	7	3	-1.1408			9236	9236	6783.2	7029.2	7636.3	7732.6	7809.3	7429.2	6832.2	6509.8	7321.6
tr|A0A0P0VA70|A0A0P0VA70_ORYSJ;tr|A0A0P0VA82|A0A0P0VA82_ORYSJ;tr|Q0JHT2|Q0JHT2_ORYSJ	214;192;214	tr|A0A0P0VA70|A0A0P0VA70_ORYSJ	tr|A0A0P0VA70|A0A0P0VA70_ORYSJ	>tr|A0A0P0VA70|A0A0P0VA70_ORYSJ Os01g0844800 protein (Fragment) OS=Oryza sativa subsp. japonica OX=39947 GN=Os01g0844800 PE=4 SV=1;>tr|A0A0P0VA82|A0A0P0VA82_ORYSJ Os01g0844800 protein (Fragment) OS=Oryza sativa subsp. japonica OX=39947 GN=Os01g0844800 PE=4	1	9.21e-09	88.915	1	S	GGGDGLIGLSLGRQRSFADILQDNIGRRTPA	X;X;X;X;X;X;X;X;X;X;X;X;X;X;X;Phospho (STY);X;X;X;X;X;X;X;X;X;X;X;X;X;X;X	XXXXXXXXXXXXXPPPPPPPPPPPPPPXXXX	S(1)FADILQDNIGR	1	2	-1.8063			13142;13143;13144;14492;14493	14493	18230	16412	16476	16837	16583	16964	17604	17624	17784
tr|A0A0P0VA70|A0A0P0VA70_ORYSJ;tr|A0A0P0VA82|A0A0P0VA82_ORYSJ;tr|Q0JHT2|Q0JHT2_ORYSJ	59;37;59	tr|A0A0P0VA70|A0A0P0VA70_ORYSJ	tr|A0A0P0VA70|A0A0P0VA70_ORYSJ	>tr|A0A0P0VA70|A0A0P0VA70_ORYSJ Os01g0844800 protein (Fragment) OS=Oryza sativa subsp. japonica OX=39947 GN=Os01g0844800 PE=4 SV=1;>tr|A0A0P0VA82|A0A0P0VA82_ORYSJ Os01g0844800 protein (Fragment) OS=Oryza sativa subsp. japonica OX=39947 GN=Os01g0844800 PE=4	0.55507	3.6e-21	105.82	1	S	GEDAGERERELNMFRSGSAPPTIEGSLNAIS	X;X;X;X;X;X;X;X;X;X;X;X;X;X;X;Phospho (STY);X;X;X;X;X;X;X;X;X;X;X;X;X;X;X	XXXXXXXXXXXXXXXPPPPPPPPPPPPPPPP	S(0.555)GS(0.445)APPTIEGSLNAISGLLR	1	3	-1.4809			14699;14700	14700	990.83	1046.4	863.32	1102.2	885	1025.1	1046.3	920.58	1239.6
tr|A0A0P0VA70|A0A0P0VA70_ORYSJ;tr|A0A0P0VA82|A0A0P0VA82_ORYSJ;tr|Q0JHT2|Q0JHT2_ORYSJ	313;291;313	tr|A0A0P0VA70|A0A0P0VA70_ORYSJ	tr|A0A0P0VA70|A0A0P0VA70_ORYSJ	>tr|A0A0P0VA70|A0A0P0VA70_ORYSJ Os01g0844800 protein (Fragment) OS=Oryza sativa subsp. japonica OX=39947 GN=Os01g0844800 PE=4 SV=1;>tr|A0A0P0VA82|A0A0P0VA82_ORYSJ Os01g0844800 protein (Fragment) OS=Oryza sativa subsp. japonica OX=39947 GN=Os01g0844800 PE=4	1	0.000348429	47.142	1	S	SRNATPDSHYVPRVPSPGLPPVGVRINSNEK	X;X;X;X;X;X;X;X;X;X;X;X;X;X;X;Phospho (STY);X;X;X;X;X;X;X;X;X;X;X;X;X;X;X	XXXXXXXXXXXXXPPPPPPPPPPPPXXXXXX	VPS(1)PGLPPVGVR	3	2	0.34472			18802;18803;18804;18805;18806	18806	20569	20017	19079	20494	20533	19561	19673	19199	19784
tr|A0A0P0VAZ1|A0A0P0VAZ1_ORYSJ	286	tr|A0A0P0VAZ1|A0A0P0VAZ1_ORYSJ	tr|A0A0P0VAZ1|A0A0P0VAZ1_ORYSJ	>tr|A0A0P0VAZ1|A0A0P0VAZ1_ORYSJ Os01g0873900 protein OS=Oryza sativa subsp. japonica OX=39947 GN=Os01g0873900 PE=4 SV=1	0.951938	1.44e-11	104.77	1	S	LRDVKYRKFIPGISKSQEFETKSRHSKQSRL	X;X;X;X;X;X;X;X;X;X;X;X;X;X;X;Phospho (STY);X;X;X;X;X;X;X;X;X;X;X;X;X;X;X	XXXXXXXXPPPPPPPPPPPPPPXXXXXXXXX	FIPGIS(0.048)KS(0.952)QEFETK	8	3	0.44717			5563;5564;5565	5563	28386	28278	28023	27866	27819	28372	32360	33167	33365
tr|A0A0P0VAZ3|A0A0P0VAZ3_ORYSJ;tr|Q0JHE8|Q0JHE8_ORYSJ	297;432	tr|A0A0P0VAZ3|A0A0P0VAZ3_ORYSJ	tr|A0A0P0VAZ3|A0A0P0VAZ3_ORYSJ	>tr|A0A0P0VAZ3|A0A0P0VAZ3_ORYSJ Os01g0867800 protein (Fragment) OS=Oryza sativa subsp. japonica OX=39947 GN=Os01g0867800 PE=4 SV=1;>tr|Q0JHE8|Q0JHE8_ORYSJ Os01g0867800 protein OS=Oryza sativa subsp. japonica OX=39947 GN=Os01g0867800 PE=2 SV=1	0.953009	0.0169097	39.071	1	S	VEKHASKLDRTNIRISFSQMQNI________	X;X;X;X;X;X;X;X;X;X;X;X;X;X;X;Phospho (STY);X;X;X;X;X;X;X;X;X;X;X;X;X;X;X	XXXXXXXXXXXXXXPPPPPPPPPXXXXXXXX	IS(0.953)FS(0.047)QMQNI	2	2	0.30531			8652;8653	8653	987.76	1112.4	750.99	821.03	886.58	817.8	997.96	922.37	1202
tr|A0A0P0VBA3|A0A0P0VBA3_ORYSJ	78	tr|A0A0P0VBA3|A0A0P0VBA3_ORYSJ	tr|A0A0P0VBA3|A0A0P0VBA3_ORYSJ	>tr|A0A0P0VBA3|A0A0P0VBA3_ORYSJ Os01g0887400 protein OS=Oryza sativa subsp. japonica OX=39947 GN=Os01g0887400 PE=4 SV=1	0.98893	1.81e-12	76.453	1	S	EKGGGGGGWDDYLGMSDDELMGQCEMGTFKA	X;X;X;X;X;X;X;X;X;X;X;X;X;X;X;Phospho (STY);X;X;X;X;X;X;X;X;X;X;X;X;X;X;X	XXPPPPPPPPPPPPPPPPPPPPPPPPPPPPX	GGGGGGWDDY(0.011)LGMS(0.989)DDELMGQCEMGTFK	14	3	-0.062129			6406;6407;6408;6409;6410;6411	6408	7940	8045.3	6645.9	7291.1	7554.2	7674.7	6552.3	6598.7	6175.4
tr|A0A0P0VBF4|A0A0P0VBF4_ORYSJ	48	tr|A0A0P0VBF4|A0A0P0VBF4_ORYSJ	tr|A0A0P0VBF4|A0A0P0VBF4_ORYSJ	>tr|A0A0P0VBF4|A0A0P0VBF4_ORYSJ Os01g0886900 protein OS=Oryza sativa subsp. japonica OX=39947 GN=Os01g0886900 PE=3 SV=1	1	0.00201891	35.614	2	S	QLSLSLSNHCVVSHRSVSRPPGRRRWRFRVG	X;X;X;X;X;X;X;X;X;X;X;X;X;X;X;Phospho (STY);X;Phospho (STY);X;X;X;X;X;X;X;X;X;X;X;X;X	XXXXXXXXXXXXXXXPPPPPPPPPXXXXXXX	S(1)VS(1)RPPGRR	1	2	3.3263			16269;16270;16271	16271	37516	39376	36290	41821	42195	41887	39751	37288	38745
tr|A0A0P0VBF4|A0A0P0VBF4_ORYSJ	50	tr|A0A0P0VBF4|A0A0P0VBF4_ORYSJ	tr|A0A0P0VBF4|A0A0P0VBF4_ORYSJ	>tr|A0A0P0VBF4|A0A0P0VBF4_ORYSJ Os01g0886900 protein OS=Oryza sativa subsp. japonica OX=39947 GN=Os01g0886900 PE=3 SV=1	1	0.00201891	35.614	2	S	SLSLSNHCVVSHRSVSRPPGRRRWRFRVGHL	X;X;X;X;X;X;X;X;X;X;X;X;X;Phospho (STY);X;Phospho (STY);X;X;X;X;X;X;X;X;X;X;X;X;X;X;X	XXXXXXXXXXXXXPPPPPPPPPXXXXXXXXX	S(1)VS(1)RPPGRR	3	2	3.3263			16269;16270;16271	16271	37516	39376	36290	41821	42195	41887	39751	37288	38745
tr|A0A0P0VC44|A0A0P0VC44_ORYSJ	1466	tr|A0A0P0VC44|A0A0P0VC44_ORYSJ	tr|A0A0P0VC44|A0A0P0VC44_ORYSJ	>tr|A0A0P0VC44|A0A0P0VC44_ORYSJ THO complex subunit 2 OS=Oryza sativa subsp. japonica OX=39947 GN=Os01g0916800 PE=3 SV=1	1	8.11e-10	65.527	1	S	SIDRAHPSDERFRGQSLPPPPPLPASFVPQS	X;X;X;X;X;X;X;X;X;X;X;X;X;X;X;Phospho (STY);X;X;X;X;X;X;X;X;X;X;X;X;X;X;X	XXXXXXXXXXXXXPPPPPPPPPPPPPPPPPP	GQS(1)LPPPPPLPASFVPQSVGNR	3	3	0.72347			7255;7256;7257	7256	4934.8	5215.6	4482.8	4288.5	3716.2	4541.5	4390.8	4239	4107.6
tr|A0A0P0VC65|A0A0P0VC65_ORYSJ	258	tr|A0A0P0VC65|A0A0P0VC65_ORYSJ	tr|A0A0P0VC65|A0A0P0VC65_ORYSJ	>tr|A0A0P0VC65|A0A0P0VC65_ORYSJ Os01g0925700 protein (Fragment) OS=Oryza sativa subsp. japonica OX=39947 GN=Os01g0925700 PE=4 SV=1	0.420839	0.00257464	63.531		S	NNKPQAKPNIPRLVTSTSTTKLERFPPPHLD	X;X;X;X;X;X;X;X;X;X;X;X;X;X;X;Phospho (STY);X;X;X;X;X;X;X;X;X;X;X;X;X;X;X	XXXXXXXXXXXXPPPPPPPPPXXXXXXXXXX	LVT(0.028)S(0.421)T(0.312)S(0.233)T(0.006)T(0.002)K	4	2	1.7175				11295	0	0	0	0	0	0	0	0	0
tr|A0A0P0VC65|A0A0P0VC65_ORYSJ	260	tr|A0A0P0VC65|A0A0P0VC65_ORYSJ	tr|A0A0P0VC65|A0A0P0VC65_ORYSJ	>tr|A0A0P0VC65|A0A0P0VC65_ORYSJ Os01g0925700 protein (Fragment) OS=Oryza sativa subsp. japonica OX=39947 GN=Os01g0925700 PE=4 SV=1	0.851081	0.0011728	84.859	1	S	KPQAKPNIPRLVTSTSTTKLERFPPPHLDAS	X;X;X;X;X;X;X;X;X;X;X;X;X;X;X;Phospho (STY);X;X;X;X;X;X;X;X;X;X;X;X;X;X;X	XXXXXXXXXXPPPPPPPPPXXXXXXXXXXXX	LVTS(0.002)T(0.09)S(0.851)T(0.042)T(0.014)K	6	2	0.13692			11296	11296	5516.4	6115.3	5741.5	6444.2	5613.9	6260.5	6843.2	7304.3	8159.1
tr|A0A0P0VCJ7|A0A0P0VCJ7_ORYSJ;tr|Q5JMK3|Q5JMK3_ORYSJ	116;241	tr|A0A0P0VCJ7|A0A0P0VCJ7_ORYSJ	tr|A0A0P0VCJ7|A0A0P0VCJ7_ORYSJ	>tr|A0A0P0VCJ7|A0A0P0VCJ7_ORYSJ Os01g0936800 protein (Fragment) OS=Oryza sativa subsp. japonica OX=39947 GN=Os01g0936800 PE=4 SV=1;>tr|Q5JMK3|Q5JMK3_ORYSJ Os01g0936800 protein OS=Oryza sativa subsp. japonica OX=39947 GN=Os01g0936800 PE=2 SV=1	0.367812	5.23e-05	39.507		S	EVPTPLKETPVILTESPPPPTDTSSITVESL	X;X;X;X;X;X;X;X;X;X;X;X;X;X;X;Phospho (STY);X;X;X;X;X;X;X;X;X;X;X;X;X;X;X	XXXXXXXPPPPPPPPPPPPPPPPPPPPPPPP	ET(0.001)PVILT(0.039)ES(0.368)PPPPT(0.111)DT(0.111)S(0.111)S(0.111)IT(0.111)VES(0.036)LHPFEQNLASLK	9	4	-1.4689				4968	0	0	0	0	0	0	0	0	0
tr|A0A0P0VCJ7|A0A0P0VCJ7_ORYSJ;tr|Q5JMK3|Q5JMK3_ORYSJ	91;216	tr|A0A0P0VCJ7|A0A0P0VCJ7_ORYSJ	tr|A0A0P0VCJ7|A0A0P0VCJ7_ORYSJ	>tr|A0A0P0VCJ7|A0A0P0VCJ7_ORYSJ Os01g0936800 protein (Fragment) OS=Oryza sativa subsp. japonica OX=39947 GN=Os01g0936800 PE=4 SV=1;>tr|Q5JMK3|Q5JMK3_ORYSJ Os01g0936800 protein OS=Oryza sativa subsp. japonica OX=39947 GN=Os01g0936800 PE=2 SV=1	1	1.5e-13	120.5	1	S	PVRETSFLREVPAPVSPVKETPILREVPTPL	X;X;X;X;X;X;X;X;X;X;X;X;X;X;X;Phospho (STY);X;X;X;X;X;X;X;X;X;X;X;X;X;X;X	XXXXXXXXXPPPPPPPPPPPPPPPPXXXXXX	EVPAPVS(1)PVK	7	2	1.0779			5073;5074;5075;5076;5077;5078;5079;5080	5075	50462	47026	45492	53342	52423	55692	55755	55987	55470
tr|A0A0P0VCJ7|A0A0P0VCJ7_ORYSJ;tr|Q5JMK3|Q5JMK3_ORYSJ	75;200	tr|A0A0P0VCJ7|A0A0P0VCJ7_ORYSJ	tr|A0A0P0VCJ7|A0A0P0VCJ7_ORYSJ	>tr|A0A0P0VCJ7|A0A0P0VCJ7_ORYSJ Os01g0936800 protein (Fragment) OS=Oryza sativa subsp. japonica OX=39947 GN=Os01g0936800 PE=4 SV=1;>tr|Q5JMK3|Q5JMK3_ORYSJ Os01g0936800 protein OS=Oryza sativa subsp. japonica OX=39947 GN=Os01g0936800 PE=2 SV=1	1	0.000133204	41.267	1	S	PVKEAPILREVPVHISPVRETSFLREVPAPV	X;X;X;X;X;X;X;X;X;X;X;X;X;X;X;Phospho (STY);X;X;X;X;X;X;X;X;X;X;X;X;X;X;X	XXXXXXXXXPPPPPPPPPPXXXXXXXXXXXX	EVPVHIS(1)PVR	7	3	-1.0197			5081;5082;5083	5083	4519.1	4567.8	4643.8	5296.9	5499.1	5313.6	5032.9	5197.1	5255.6
tr|Q5JN26|Q5JN26_ORYSJ;tr|A0A0P0VD20|A0A0P0VD20_ORYSJ;tr|Q5JN27|Q5JN27_ORYSJ	184;489;775	tr|Q5JN26|Q5JN26_ORYSJ	tr|Q5JN26|Q5JN26_ORYSJ	>tr|Q5JN26|Q5JN26_ORYSJ Os01g0960400 protein OS=Oryza sativa subsp. japonica OX=39947 GN=Os01g0960400 PE=3 SV=1;>tr|A0A0P0VD20|A0A0P0VD20_ORYSJ Os01g0960400 protein (Fragment) OS=Oryza sativa subsp. japonica OX=39947 GN=Os01g0960400 PE=4 SV=1;>tr|Q5JN27|Q5	0.783457	6.53e-07	57.501	1	S	LAPEPESEGIAPGHVSTVIKGTPGYLDPEYF	X;X;X;X;X;X;X;X;X;X;X;X;X;X;X;Phospho (STY);X;X;X;X;X;Phospho (STY);X;X;X;X;X;X;X;X;X	PPPPPPPPPPPPPPPPPPPPXXXXXXXXXXX	LAPEPES(0.001)EGIAPGHVS(0.783)T(0.216)VIK	16	3	-0.67674			9718	9718	2815.2	2902.7	3227.4	3430.5	3358.4	3310.4	3080.7	3037.7	3386.6
tr|A0A0P0VDM9|A0A0P0VDM9_ORYSJ	48	tr|A0A0P0VDM9|A0A0P0VDM9_ORYSJ	tr|A0A0P0VDM9|A0A0P0VDM9_ORYSJ	>tr|A0A0P0VDM9|A0A0P0VDM9_ORYSJ Os02g0104500 protein (Fragment) OS=Oryza sativa subsp. japonica OX=39947 GN=Os02g0104500 PE=4 SV=1	0.999991	6.52e-12	79.169	2	S	SSKRAPPKDKPATPDSPAPPPPAYYFKNKPD	X;X;X;X;X;X;X;X;X;X;X;X;Phospho (STY);X;X;Phospho (STY);X;X;X;X;X;X;X;X;X;X;X;X;X;X;X	XXXXXXXXPPPPPPPPPPPPPPPPPPPXXXX	DKPAT(1)PDS(1)PAPPPPAYYFK	8	4	-1.1706			3010;3011;3012	3011	8989.6	8210.4	8313.2	8440.1	8235.8	8525.7	9107.4	8360	8812.6
tr|A0A0P0VDQ1|A0A0P0VDQ1_ORYSJ	290	tr|A0A0P0VDQ1|A0A0P0VDQ1_ORYSJ	tr|A0A0P0VDQ1|A0A0P0VDQ1_ORYSJ	>tr|A0A0P0VDQ1|A0A0P0VDQ1_ORYSJ Os02g0105100 protein (Fragment) OS=Oryza sativa subsp. japonica OX=39947 GN=Os02g0105100 PE=4 SV=1	0.999876	2.37e-07	72.664	1	S	SGTYSEQINAVAGARSPDQQTMPSPLMPGKQ	X;X;X;X;X;X;X;X;X;X;X;X;X;X;X;Phospho (STY);X;X;X;X;X;X;X;X;X;X;X;X;X;X;X	XXXXXXXXXXXXXXXPPPPPPPPPPPPPPPX	S(1)PDQQTMPSPLMPGK	1	3	2.2749			15424;15425	15425	9598.9	9395.2	9158.5	10362	10260	11573	9936.1	9601.1	10967
tr|A0A0P0VE15|A0A0P0VE15_ORYSJ;tr|Q6Z725|Q6Z725_ORYSJ	232;262	tr|A0A0P0VE15|A0A0P0VE15_ORYSJ	tr|A0A0P0VE15|A0A0P0VE15_ORYSJ	>tr|A0A0P0VE15|A0A0P0VE15_ORYSJ Os02g0122800 protein OS=Oryza sativa subsp. japonica OX=39947 GN=Os02g0122800 PE=4 SV=1;>tr|Q6Z725|Q6Z725_ORYSJ Os02g0122800 protein OS=Oryza sativa subsp. japonica OX=39947 GN=Os02g0122800 PE=2 SV=1	1	2.12e-05	89.408	1	S	RGSPPNNYDRERREASPGYDRPRSRSPARYE	X;X;Phospho (STY);X;X;X;X;X;X;X;X;X;X;X;X;Phospho (STY);X;X;X;X;X;X;X;X;X;X;X;X;X;X;X	XXXXXXXXXXXXPPPPPPPPPPPXXXXXXXX	EAS(1)PGYDRPR	3	2	-0.13254			3733;3734;3735;3736;13414;13415;13416;13417;13418;13419;13420;13421;13422;13423	3734	45533	45121	39702	45569	45486	46750	47047	43623	45200
tr|A0A0P0VE15|A0A0P0VE15_ORYSJ;tr|Q6Z725|Q6Z725_ORYSJ	177;207	tr|A0A0P0VE15|A0A0P0VE15_ORYSJ	tr|A0A0P0VE15|A0A0P0VE15_ORYSJ	>tr|A0A0P0VE15|A0A0P0VE15_ORYSJ Os02g0122800 protein OS=Oryza sativa subsp. japonica OX=39947 GN=Os02g0122800 PE=4 SV=1;>tr|Q6Z725|Q6Z725_ORYSJ Os02g0122800 protein OS=Oryza sativa subsp. japonica OX=39947 GN=Os02g0122800 PE=2 SV=1	0.999989	0.000443909	82.027	1	S	RGRSASPYGRGRERGSPDYGRGRERGSPDYG	X;X;X;Phospho (STY);X;Phospho (STY);X;X;X;X;X;X;X;X;X;Phospho (STY);X;X;X;X;X;X;X;X;X;X;X;X;X;X;X	XXXXXXXXXXXXPPPPPPPPPXXXXXXXXXX	ERGS(1)PDYGR	4	2	-0.016423			4794;4795;4796;4797;4798;4799;4800;4801;4802;4803;4804;4805;7394;7395;7396	4804	83307	83267	80230	82787	80124	83649	90360	90523	88181
tr|A0A0P0VE15|A0A0P0VE15_ORYSJ;tr|Q6Z725|Q6Z725_ORYSJ	207;237	tr|A0A0P0VE15|A0A0P0VE15_ORYSJ	tr|A0A0P0VE15|A0A0P0VE15_ORYSJ	>tr|A0A0P0VE15|A0A0P0VE15_ORYSJ Os02g0122800 protein OS=Oryza sativa subsp. japonica OX=39947 GN=Os02g0122800 PE=4 SV=1;>tr|Q6Z725|Q6Z725_ORYSJ Os02g0122800 protein OS=Oryza sativa subsp. japonica OX=39947 GN=Os02g0122800 PE=2 SV=1	1	1.66e-05	51.435	1;2	S	GRGGDRGSPDYHRGASPQGGNKGDERGSPPN	X;X;X;X;X;X;X;Phospho (STY);X;X;X;X;X;X;X;Phospho (STY);X;X;X;X;X;X;X;X;X;X;X;Phospho (STY);X;X;X	XXXXXXXXXXXXXPPPPPPPPPPPPPPPPPP	GAS(1)PQGGNKGDER	3	3	0.063547			5983;5984;5985;5986;5987;5988;5989;5990;5991;5992;5993;5994	5993	98160	100620	95165	98078	103220	105480	110730	108990	136030
tr|A0A0P0VE15|A0A0P0VE15_ORYSJ;tr|Q6Z725|Q6Z725_ORYSJ	219;249	tr|A0A0P0VE15|A0A0P0VE15_ORYSJ	tr|A0A0P0VE15|A0A0P0VE15_ORYSJ	>tr|A0A0P0VE15|A0A0P0VE15_ORYSJ Os02g0122800 protein OS=Oryza sativa subsp. japonica OX=39947 GN=Os02g0122800 PE=4 SV=1;>tr|Q6Z725|Q6Z725_ORYSJ Os02g0122800 protein OS=Oryza sativa subsp. japonica OX=39947 GN=Os02g0122800 PE=2 SV=1	0.999602	1.66e-05	42.694	1;2	S	RGASPQGGNKGDERGSPPNNYDRERREASPG	X;X;X;Phospho (STY);X;X;X;X;X;X;X;X;X;X;X;Phospho (STY);X;X;X;X;X;X;X;X;X;X;X;X;Phospho (STY);X;X	XPPPPPPPPPPPPPPPPPPPPPPXXXXXXXX	GAS(0.997)PQGGNKGDERGS(1)PPNNY(0.003)DR	15	4	0.29509			5994;7402	5994	26205	25402	22082	15916	16911	16155	19845	21005	20950
tr|A0A0P0VE15|A0A0P0VE15_ORYSJ;tr|Q6Z725|Q6Z725_ORYSJ	199;229	tr|A0A0P0VE15|A0A0P0VE15_ORYSJ	tr|A0A0P0VE15|A0A0P0VE15_ORYSJ	>tr|A0A0P0VE15|A0A0P0VE15_ORYSJ Os02g0122800 protein OS=Oryza sativa subsp. japonica OX=39947 GN=Os02g0122800 PE=4 SV=1;>tr|Q6Z725|Q6Z725_ORYSJ Os02g0122800 protein OS=Oryza sativa subsp. japonica OX=39947 GN=Os02g0122800 PE=2 SV=1	0.999994	4.24e-05	82.171	1	S	RERGSPDYGRGGDRGSPDYHRGASPQGGNKG	X;X;X;X;X;X;X;X;X;X;X;X;X;X;X;Phospho (STY);X;X;X;X;X;X;X;Phospho (STY);X;X;X;X;X;X;X	XXXXXXXXXXPPPPPPPPPPPXXXXXXXXXX	GGDRGS(1)PDYHR	6	2	0.40569			6343;6344;6345;6346;6347;6348;6349;6350;6351;6352	6345	13780	13931	13655	15017	15347	16017	14491	15572	15513
tr|A0A0P0VE15|A0A0P0VE15_ORYSJ;tr|Q6Z725|Q6Z725_ORYSJ	165;195	tr|A0A0P0VE15|A0A0P0VE15_ORYSJ	tr|A0A0P0VE15|A0A0P0VE15_ORYSJ	>tr|A0A0P0VE15|A0A0P0VE15_ORYSJ Os02g0122800 protein OS=Oryza sativa subsp. japonica OX=39947 GN=Os02g0122800 PE=4 SV=1;>tr|Q6Z725|Q6Z725_ORYSJ Os02g0122800 protein OS=Oryza sativa subsp. japonica OX=39947 GN=Os02g0122800 PE=2 SV=1	0.999893	0.00693615	35.115	2	S	RGRDRSPDRRDYRGRSASPYGRGRERGSPDY	X;X;X;X;X;X;X;X;X;X;X;X;X;X;X;Phospho (STY);X;Phospho (STY);X;X;X;X;X;X;X;X;X;Phospho (STY);X;X;X	XXXXXXXXXXXXXPPPPPPPPPXXXXXXXXX	GRS(1)AS(0.998)PY(0.002)GR	3	3	-0.40832			7294	7294	6113.2	6314.6	6431.3	6650.1	6404.2	6572.6	6352.4	6962	6606.7
tr|A0A0P0VE15|A0A0P0VE15_ORYSJ;tr|Q6Z725|Q6Z725_ORYSJ	167;197	tr|A0A0P0VE15|A0A0P0VE15_ORYSJ	tr|A0A0P0VE15|A0A0P0VE15_ORYSJ	>tr|A0A0P0VE15|A0A0P0VE15_ORYSJ Os02g0122800 protein OS=Oryza sativa subsp. japonica OX=39947 GN=Os02g0122800 PE=4 SV=1;>tr|Q6Z725|Q6Z725_ORYSJ Os02g0122800 protein OS=Oryza sativa subsp. japonica OX=39947 GN=Os02g0122800 PE=2 SV=1	0.998398	0.00693615	35.115	2	S	RDRSPDRRDYRGRSASPYGRGRERGSPDYGR	X;X;X;X;X;X;X;X;X;X;X;X;X;Phospho (STY);X;Phospho (STY);X;X;X;X;X;X;X;X;X;Phospho (STY);X;X;X;X;X	XXXXXXXXXXXPPPPPPPPPXXXXXXXXXXX	GRS(1)AS(0.998)PY(0.002)GR	5	3	-0.40832			7294	7294	6113.2	6314.6	6431.3	6650.1	6404.2	6572.6	6352.4	6962	6606.7
tr|A0A0P0VE15|A0A0P0VE15_ORYSJ;tr|Q6Z725|Q6Z725_ORYSJ	57;87	tr|A0A0P0VE15|A0A0P0VE15_ORYSJ	tr|A0A0P0VE15|A0A0P0VE15_ORYSJ	>tr|A0A0P0VE15|A0A0P0VE15_ORYSJ Os02g0122800 protein OS=Oryza sativa subsp. japonica OX=39947 GN=Os02g0122800 PE=4 SV=1;>tr|Q6Z725|Q6Z725_ORYSJ Os02g0122800 protein OS=Oryza sativa subsp. japonica OX=39947 GN=Os02g0122800 PE=2 SV=1	1	8.06e-05	75.404	1	S	TKEDRSGGRRGNSKRSPNNTRPTKTLFVINF	X;X;X;X;X;X;X;X;X;X;X;X;X;X;X;Phospho (STY);X;X;X;X;X;X;X;X;X;X;X;X;X;X;X	XXXXXXXXXXXXXXPPPPPPPPPPXXXXXXX	RS(1)PNNTRPTK	2	4	-0.099049			13820;13821;13822;15463;15464;15465;15466;15467;15468	13822	66663	62591	64142	62607	62660	65234	66541	67029	66239
tr|A0A0P0VEA4|A0A0P0VEA4_ORYSJ	382	tr|A0A0P0VEA4|A0A0P0VEA4_ORYSJ	tr|A0A0P0VEA4|A0A0P0VEA4_ORYSJ	>tr|A0A0P0VEA4|A0A0P0VEA4_ORYSJ Os02g0131100 protein (Fragment) OS=Oryza sativa subsp. japonica OX=39947 GN=Os02g0131100 PE=4 SV=1	0.991229	0.00189847	76.243	1	S	QVQERGLNVVSPKATSEADEKFVEITKPEFS	X;X;X;X;X;X;X;X;X;X;Phospho (STY);X;X;X;X;Phospho (STY);X;X;X;X;X;X;X;X;X;X;X;X;X;X;X	XXXXXXXXXXXXXPPPPPPPPXXXXXXXXXX	AT(0.009)S(0.991)EADEK	3	2	0.27862			2171;2172;2173	2173	33257	32069	29902	38330	36642	38796	34182	34751	32935
tr|A0A0P0VEA4|A0A0P0VEA4_ORYSJ;tr|A0A0P0VED8|A0A0P0VED8_ORYSJ	96;511	tr|A0A0P0VEA4|A0A0P0VEA4_ORYSJ	tr|A0A0P0VEA4|A0A0P0VEA4_ORYSJ	>tr|A0A0P0VEA4|A0A0P0VEA4_ORYSJ Os02g0131100 protein (Fragment) OS=Oryza sativa subsp. japonica OX=39947 GN=Os02g0131100 PE=4 SV=1;>tr|A0A0P0VED8|A0A0P0VED8_ORYSJ Os02g0131100 protein (Fragment) OS=Oryza sativa subsp. japonica OX=39947 GN=Os02g0131100 PE=4	0.882307	0.00447264	45.593	1	S	EIEDGSLNRDQDDITSPKASQEDALEEVGTE	X;X;X;X;X;X;X;X;X;X;X;X;X;X;X;Phospho (STY);X;X;X;X;X;X;X;X;X;X;X;X;X;X;X	XXXXXXXXXPPPPPPPPPXXXXXXXXXXXXX	DQDDIT(0.118)S(0.882)PK	7	2	0.68666			3279;3280;3281	3280	24483	24543	24014	29981	29140	29575	30561	29170	29651
tr|A0A0P0VEA4|A0A0P0VEA4_ORYSJ	377	tr|A0A0P0VEA4|A0A0P0VEA4_ORYSJ	tr|A0A0P0VEA4|A0A0P0VEA4_ORYSJ	>tr|A0A0P0VEA4|A0A0P0VEA4_ORYSJ Os02g0131100 protein (Fragment) OS=Oryza sativa subsp. japonica OX=39947 GN=Os02g0131100 PE=4 SV=1	1	0.000758506	52.082	1;2	S	ELFDSQVQERGLNVVSPKATSEADEKFVEIT	X;X;X;X;X;X;X;X;X;X;X;X;X;X;X;Phospho (STY);X;X;X;Phospho (STY);Phospho (STY);X;X;X;X;X;X;X;X;X;X	XXXXXXXXXXPPPPPPPPPPPPPPPPXXXXX	GLNVVS(1)PK	6	3	-0.47611			6983;6984;6985;6986;6987;6988;6989;6990;6991;6992;6993;6994;6995	6993	111670	113820	105760	118280	114980	118170	105420	107970	133190
tr|A0A0P0VEB3|A0A0P0VEB3_ORYSJ	443	tr|A0A0P0VEB3|A0A0P0VEB3_ORYSJ	tr|A0A0P0VEB3|A0A0P0VEB3_ORYSJ	>tr|A0A0P0VEB3|A0A0P0VEB3_ORYSJ Os02g0131700 protein OS=Oryza sativa subsp. japonica OX=39947 GN=Os02g0131700 PE=4 SV=1	1	0.013298	24.672	1	S	NGYQRVPHHERGILGSHNARN__________	X;X;X;X;X;X;X;X;X;X;X;X;X;X;X;Phospho (STY);X;X;X;X;X;X;X;X;X;X;X;X;X;X;X	XXXXXXXXXXXPPPPPPPPPXXXXXXXXXXX	GILGS(1)HNAR	5	2	-3.1204			6751	6751	7822.7	8355.3	8909.9	9231.5	8460.1	9715.8	10528	10807	12151
tr|A0A0P0VF21|A0A0P0VF21_ORYSJ;tr|Q6ETI1|Q6ETI1_ORYSJ	67;546	tr|A0A0P0VF21|A0A0P0VF21_ORYSJ	tr|A0A0P0VF21|A0A0P0VF21_ORYSJ	>tr|A0A0P0VF21|A0A0P0VF21_ORYSJ Os02g0159200 protein (Fragment) OS=Oryza sativa subsp. japonica OX=39947 GN=Os02g0159200 PE=4 SV=1;>tr|Q6ETI1|Q6ETI1_ORYSJ Os02g0159200 protein OS=Oryza sativa subsp. japonica OX=39947 GN=Os02g0159200 PE=2 SV=1	0.84923	0.0183419	14.682	1	S	NSVIDFGNLLPRAPSSHRKHRSRSAHPRSGG	X;X;X;X;X;X;X;X;X;X;X;X;X;X;X;Phospho (STY);X;X;X;X;X;X;X;X;X;X;X;X;X;X;X	XXXXXXXXXXXXPPPPPPPXXXXXXXXXXXX	APS(0.151)S(0.849)HRK	4	3	0.22361			1535	1535	2475.1	2495.7	2315.9	1083.8	1218	898.75	3131.1	3227.4	3086.1
tr|A0A0P0VF21|A0A0P0VF21_ORYSJ;tr|Q6ETI1|Q6ETI1_ORYSJ	146;625	tr|A0A0P0VF21|A0A0P0VF21_ORYSJ	tr|A0A0P0VF21|A0A0P0VF21_ORYSJ	>tr|A0A0P0VF21|A0A0P0VF21_ORYSJ Os02g0159200 protein (Fragment) OS=Oryza sativa subsp. japonica OX=39947 GN=Os02g0159200 PE=4 SV=1;>tr|Q6ETI1|Q6ETI1_ORYSJ Os02g0159200 protein OS=Oryza sativa subsp. japonica OX=39947 GN=Os02g0159200 PE=2 SV=1	0.965364	7.73e-14	120.01	1	S	SNREVAPQHPPERTVSLPSDSGNLGVKPKAP	X;X;X;X;X;X;X;X;X;X;X;X;X;X;X;Phospho (STY);X;X;X;X;X;X;X;X;X;X;X;X;X;X;X	XXXXXXXXXXXXXPPPPPPPPPPPPPPPPXX	T(0.035)VS(0.965)LPSDSGNLGVKPK	3	4	-0.076654			17657;17658;17659;17660;17661;17662	17660	64738	62628	62032	44041	43160	44471	68783	67815	70621
tr|A0A0P0VFD5|A0A0P0VFD5_ORYSJ	170	tr|A0A0P0VFD5|A0A0P0VFD5_ORYSJ	tr|A0A0P0VFD5|A0A0P0VFD5_ORYSJ	>tr|A0A0P0VFD5|A0A0P0VFD5_ORYSJ Os02g0167500 protein (Fragment) OS=Oryza sativa subsp. japonica OX=39947 GN=Os02g0167500 PE=4 SV=1	0.99998	6.71e-05	83.182	1	S	ESEHERRGLSHERDRSPYMQHSRSRSRGRDE	X;X;X;X;X;X;X;X;X;X;X;X;X;X;X;Phospho (STY);X;X;X;X;X;X;X;X;X;X;X;X;X;X;X	XXXXXXXXXXXXXPPPPPPPPPPXXXXXXXX	DRS(1)PYMQHSR	3	3	-0.017642			3334;3335	3334	6045	6788.5	5991.3	5354.6	4896.6	5274.6	5663.7	6270.6	6574.7
tr|A0A0P0VFF6|A0A0P0VFF6_ORYSJ;tr|Q6H703|Q6H703_ORYSJ	62;327	tr|A0A0P0VFF6|A0A0P0VFF6_ORYSJ	tr|A0A0P0VFF6|A0A0P0VFF6_ORYSJ	>tr|A0A0P0VFF6|A0A0P0VFF6_ORYSJ Os02g0171100 protein OS=Oryza sativa subsp. japonica OX=39947 GN=Os02g0171100 PE=3 SV=1;>tr|Q6H703|Q6H703_ORYSJ Glyceraldehyde-3-phosphate dehydrogenase OS=Oryza sativa subsp. japonica OX=39947 GN=Os02g0171100 PE=2 SV=1	0.989282	0.00445967	47.484	1	S	NVSVVDLTCRIEKSASYDDVKAAIKAASEGA	X;X;X;X;X;X;X;X;X;X;X;X;X;X;X;Phospho (STY);X;X;X;X;X;X;X;X;X;X;X;X;X;X;X	XXXXXXXXXXXXXPPPPPPPPXXXXXXXXXX	S(0.007)AS(0.989)Y(0.004)DDVK	3	2	-0.23794			14251;14252;14253	14253	33794	33119	29742	30952	30301	31724	34216	33317	32478
tr|A0A0P0VFI5|A0A0P0VFI5_ORYSJ;tr|Q6ETN1|Q6ETN1_ORYSJ;tr|Q7XRM0|Q7XRM0_ORYSJ;tr|Q6YU05|Q6YU05_ORYSJ	46;46;57;58	tr|A0A0P0VFI5|A0A0P0VFI5_ORYSJ	tr|A0A0P0VFI5|A0A0P0VFI5_ORYSJ	>tr|A0A0P0VFI5|A0A0P0VFI5_ORYSJ Os02g0177800 protein (Fragment) OS=Oryza sativa subsp. japonica OX=39947 GN=Os02g0177800 PE=3 SV=1;>tr|Q6ETN1|Q6ETN1_ORYSJ Os02g0177800 protein OS=Oryza sativa subsp. japonica OX=39947 GN=Os02g0177800 PE=3 SV=1;>tr|Q7XRM0|Q7	0.943367	0.00644173	41.562	1	S	VIVEALKVDSLQRLCSSLEPILRRVVSEEVE	X;X;X;X;X;X;X;X;X;X;X;X;X;X;X;Phospho (STY);X;X;X;X;X;X;X;X;X;X;X;X;X;X;X	XXXXXXXXXXXXXPPPPPPPPPPXXXXXXXX	LCS(0.943)S(0.057)LEPILR	3	2	-1.6519			9852	9852	3345	3157.1	3034.1	3074.7	3090.8	3286.6	3481	4239.7	3630.5
tr|A0A0P0VFL2|A0A0P0VFL2_ORYSJ;tr|Q6ETL3|Q6ETL3_ORYSJ	11;80	tr|A0A0P0VFL2|A0A0P0VFL2_ORYSJ	tr|A0A0P0VFL2|A0A0P0VFL2_ORYSJ	>tr|A0A0P0VFL2|A0A0P0VFL2_ORYSJ Ubiquitin receptor RAD23 (Fragment) OS=Oryza sativa subsp. japonica OX=39947 GN=Os02g0179300 PE=3 SV=1;>tr|Q6ETL3|Q6ETL3_ORYSJ Ubiquitin receptor RAD23 OS=Oryza sativa subsp. japonica OX=39947 GN=Os02g0179300 PE=3 SV=1	0.473481	1.32e-06	49.185		S	_____LVVMLSKSKASGSSGALSSLTSSTPL	X;X;X;X;X;X;X;X;X;X;X;X;X;X;X;Phospho (STY);X;X;X;X;X;X;X;X;X;X;X;X;X;X;X	XXXXXXXXXXXXXXPPPPPPPPPPPPPPPPP	AS(0.473)GS(0.414)S(0.113)GALSSLTSSTPLTR	2	3	3.7774				1780	0	0	0	0	0	0	0	0	0
tr|A0A0P0VFL2|A0A0P0VFL2_ORYSJ;tr|Q6ETL3|Q6ETL3_ORYSJ	13;82	tr|A0A0P0VFL2|A0A0P0VFL2_ORYSJ	tr|A0A0P0VFL2|A0A0P0VFL2_ORYSJ	>tr|A0A0P0VFL2|A0A0P0VFL2_ORYSJ Ubiquitin receptor RAD23 (Fragment) OS=Oryza sativa subsp. japonica OX=39947 GN=Os02g0179300 PE=3 SV=1;>tr|Q6ETL3|Q6ETL3_ORYSJ Ubiquitin receptor RAD23 OS=Oryza sativa subsp. japonica OX=39947 GN=Os02g0179300 PE=3 SV=1	0.80528	1.2e-22	105.04	1	S	___LVVMLSKSKASGSSGALSSLTSSTPLTR	X;X;X;X;X;X;X;X;X;X;X;X;X;X;X;Phospho (STY);X;X;X;X;X;X;X;X;X;X;X;X;X;X;X	XXXXXXXXXXXXPPPPPPPPPPPPPPPPPPP	AS(0.033)GS(0.805)S(0.161)GALSSLTSSTPLTR	4	3	0.21914			1779	1779	2786.5	2542.5	2583.7	3076.9	3160.5	3170	2756.7	2799.9	2827.6
tr|A0A0P0VFL2|A0A0P0VFL2_ORYSJ;tr|Q6ETL3|Q6ETL3_ORYSJ	14;83	tr|A0A0P0VFL2|A0A0P0VFL2_ORYSJ	tr|A0A0P0VFL2|A0A0P0VFL2_ORYSJ	>tr|A0A0P0VFL2|A0A0P0VFL2_ORYSJ Ubiquitin receptor RAD23 (Fragment) OS=Oryza sativa subsp. japonica OX=39947 GN=Os02g0179300 PE=3 SV=1;>tr|Q6ETL3|Q6ETL3_ORYSJ Ubiquitin receptor RAD23 OS=Oryza sativa subsp. japonica OX=39947 GN=Os02g0179300 PE=3 SV=1	0.486554	5.23e-22	93.392		S	__LVVMLSKSKASGSSGALSSLTSSTPLTRQ	X;X;X;X;X;X;X;X;X;X;X;X;X;X;X;X;X;X;X;X;X;X;X;X;X;X;X;X;X;X;X	XXXXXXXXXXXXXXXXXXXXXXXXXXXXXXX	AS(0.027)GS(0.487)S(0.487)GALSSLTSSTPLTR	5	3	1.7659				1778	0	0	0	0	0	0	0	0	0
tr|A0A0P0VFL2|A0A0P0VFL2_ORYSJ;tr|Q6ETL3|Q6ETL3_ORYSJ	154;223	tr|A0A0P0VFL2|A0A0P0VFL2_ORYSJ	tr|A0A0P0VFL2|A0A0P0VFL2_ORYSJ	>tr|A0A0P0VFL2|A0A0P0VFL2_ORYSJ Ubiquitin receptor RAD23 (Fragment) OS=Oryza sativa subsp. japonica OX=39947 GN=Os02g0179300 PE=3 SV=1;>tr|Q6ETL3|Q6ETL3_ORYSJ Ubiquitin receptor RAD23 OS=Oryza sativa subsp. japonica OX=39947 GN=Os02g0179300 PE=3 SV=1	0.989257	8.93e-05	38.53	1	S	PSSTREASLSGIPNASPLNLFPQGDANDGGG	X;X;X;X;X;X;X;X;X;X;X;X;X;X;X;Phospho (STY);X;X;X;X;X;X;X;X;X;X;X;X;X;X;X	XXXXXPPPPPPPPPPPPPPPPPPPPPPPPPP	EAS(0.002)LS(0.008)GIPNAS(0.989)PLNLFPQGDANDGGGAGGGT(0.001)LEFLR	11	4	1.7777			3732	3732	186.2	235.87	230.77	252.04	231.76	383.78	438.84	201.26	240.51
tr|A0A0P0VFR4|A0A0P0VFR4_ORYSJ	11	tr|A0A0P0VFR4|A0A0P0VFR4_ORYSJ	tr|A0A0P0VFR4|A0A0P0VFR4_ORYSJ	>tr|A0A0P0VFR4|A0A0P0VFR4_ORYSJ Calcium-transporting ATPase OS=Oryza sativa subsp. japonica OX=39947 GN=Os02g0176700 PE=3 SV=1	1	1.17e-06	87.838	1	S	_____MPVGVQAPEASPGRYHRRRDDDDGNG	X;X;X;X;X;X;X;X;X;X;X;X;X;X;X;Phospho (STY);X;X;X;X;X;X;X;X;X;X;X;X;X;X;X	XXXXXXPPPPPPPPPPPPPXXXXXXXXXXXX	PVGVQAPEAS(1)PGR	10	2	-0.2553			12766;12767;12768;12769	12769	40479	34973	40493	35291	38173	38536	41118	39603	40742
[truncated: 2,811 more rows]

## Sheet: modificationSpecificPeptides
SUPPLEMENTARY TABLE 3-2 Phospho-peptides within proteins phosphorylation level changed >1.5-fold (P<0.05)
[truncated: 2,878 more rows]

## Sheet: proteinGroups
SUPPLEMENTARY TABLE 3-3 Proteins with phosphorylation level changed >1.5-fold (P<0.05)
[truncated: 1,533 more rows]
