# Supplementary material for: ZmPP2C26 Alternative Splicing Variants Negatively Regulate Drought Tolerance in Maize
Source: Front Plant Sci. 2022 Apr 8;13:851531. doi: 10.3389/fpls.2022.851531 (PMC9024303; doi:10.3389/fpls.2022.851531)
Supplement: Supplementary file 5 [file Data_Sheet_5.XLSX]

## Sheet: SUPPLEMENTARY TABLE 4-1
SUPPLEMENTARY TABLE 4-1 Phosphopeptides that accumulated to significantly different levels between ZmPP2C26L-OE and the wild-type.
Accession	Gene Name	Proteins	Positions within proteins	Leading proteins	Protein	Fasta headers	Localization prob	PEP	Delta score	Number of Phospho (STY)	Amino acid	Sequence window	Modification window	Peptide window coverage	Phospho (STY) Probabilities	Position in peptide	Charge	Mass error [ppm]	Reverse	Potential contaminant	MS/MS IDs	Best localization MS/MS ID	L1-1	L1-2	L1-3	Nip-1	Nip-2	Nip-3	P-value	log2(FC)	FC
B2ZX90	FSM	sp|B2ZX90|FAS1_ORYSJ	285	sp|B2ZX90|FAS1_ORYSJ	sp|B2ZX90|FAS1_ORYSJ	>sp|B2ZX90|FAS1_ORYSJ Chromatin assembly factor 1 subunit FSM OS=Oryza sativa subsp. japonica OX=39947 GN=FSM PE=2 SV=1	0.99996	0.0102579	42.805	1	S	NLEGIKSLVERATQKSNIERGAKNTGSTAKE	X;X;X;X;X;X;X;X;X;X;X;X;X;X;X;Phospho (STY);X;X;X;X;X;X;X;X;X;X;X;X;X;X;X	XXXXXXXXXXXPPPPPPPPPXXXXXXXXXXX	ATQKS(1)NIER	5	2	0.099496			2062;2063	2062	-0.913147	-0.78413	-0.882729	0.212571	0.107847	0.0624585	7.50921e-05	-0.987627	0.504306
A0A0P0VC18	Os01g0917400	tr|A0A0P0VC18|A0A0P0VC18_ORYSJ;tr|A0A0P0VC32|A0A0P0VC32_ORYSJ;sp|Q5JLB5|C3H12_ORYSJ	41;131;242	tr|A0A0P0VC18|A0A0P0VC18_ORYSJ	tr|A0A0P0VC18|A0A0P0VC18_ORYSJ	>tr|A0A0P0VC18|A0A0P0VC18_ORYSJ Os01g0917400 protein (Fragment) OS=Oryza sativa subsp. japonica OX=39947 GN=Os01g0917400 PE=4 SV=1;>tr|A0A0P0VC32|A0A0P0VC32_ORYSJ Os01g0917400 protein (Fragment) OS=Oryza sativa subsp. japonica OX=39947 GN=Os01g0917400 PE=4	0.999968	0.00788465	45.962	1	S	GTMASWAFPRGSFIPSPRWQNPSNYAPMIVP	X;X;X;X;X;X;X;X;X;X;X;X;X;X;X;Phospho (STY);X;X;X;X;X;X;X;X;X;X;X;X;X;X;X	XXXXXXXXXXPPPPPPPPXXXXXXXXXXXXX	GSFIPS(1)PR	6	2	2.666			7353;7354;7355	7355	0.506814	0.585858	0.540243	1.32998	1.31024	1.31402	5.24233e-06	-0.773776	0.584885
Q5JN42	PSD2	sp|Q5JN42|PSD2_ORYSJ	56	sp|Q5JN42|PSD2_ORYSJ	sp|Q5JN42|PSD2_ORYSJ	>sp|Q5JN42|PSD2_ORYSJ Phosphatidylserine decarboxylase proenzyme 2 OS=Oryza sativa subsp. japonica OX=39947 GN=PSD2 PE=3 SV=3	0.97846	2.86e-15	100.72	1	S	RDRAGRPGGDAHASESGTGRAIAVDEFAGIA	X;X;X;X;X;X;X;X;X;X;X;X;X;X;X;Phospho (STY);X;X;X;X;X;X;X;X;X;X;X;X;X;X;X	XXXPPPPPPPPPPPPPPPPPXXXXXXXXXXX	AGRPGGDAHAS(0.006)ES(0.978)GT(0.015)GR	13	3	0.23988			794;795;796;797	794	-4.00944	-3.66331	-3.29828	-1.72029	-1.56002	-1.59905	0.000650843	-2.03056	0.24476
Q6ZKL8	Os08g0500300	sp|Q6ZKL8|P2C66_ORYSJ	519	sp|Q6ZKL8|P2C66_ORYSJ	sp|Q6ZKL8|P2C66_ORYSJ	>sp|Q6ZKL8|P2C66_ORYSJ Probable protein phosphatase 2C 66 OS=Oryza sativa subsp. japonica OX=39947 GN=Os08g0500300 PE=2 SV=1	1	0.0044626	34.113	1	S	GVTRVNSLLNLPRILSGEKRSTSWRKRR___	X;X;X;X;X;X;Phospho (STY);X;X;X;X;X;X;X;X;Phospho (STY);X;X;X;X;X;X;X;X;X;X;X;X;X;X;X	XXXXXXXXXXXXXPPPPPPPXXXXXXXXXXX	ILS(1)GEKR	3	3	-0.8502			8472;8473;8474	8474	0.623448	0.641356	0.685703	1.39403	1.43074	1.41145	3.66372e-06	-0.761902	0.589718
A0A0P0VYT7	Os03g0417800	tr|A0A0P0VYT7|A0A0P0VYT7_ORYSJ;sp|Q7Y1L9|SP1L1_ORYSJ	32;96	tr|A0A0P0VYT7|A0A0P0VYT7_ORYSJ	tr|A0A0P0VYT7|A0A0P0VYT7_ORYSJ	>tr|A0A0P0VYT7|A0A0P0VYT7_ORYSJ Os03g0417800 protein (Fragment) OS=Oryza sativa subsp. japonica OX=39947 GN=Os03g0417800 PE=3 SV=1;>sp|Q7Y1L9|SP1L1_ORYSJ Protein SPIRAL1-like 1 OS=Oryza sativa subsp. japonica OX=39947 GN=Os03g0417800 PE=3 SV=1	0.907038	2.94e-07	59.872	1	S	RADGQNTGNFLTDRPSTKVHAAPGGGSSLGY	X;X;X;X;X;X;X;X;X;X;X;X;X;X;X;Phospho (STY);X;X;X;X;X;X;X;X;X;X;X;X;X;X;X	XPPPPPPPPPPPPPPPPPXXXXXXXXXXXXX	ADGQNTGNFLT(0.011)DRPS(0.907)T(0.082)K	15	3	-0.62386			441;442	442	-0.394303	-0.323246	-0.431966	0.426255	0.310066	0.418826	9.86836e-05	-0.76822	0.587141
Q9AY76	ADF2	sp|Q9AY76|ADF2_ORYSJ	8	sp|Q9AY76|ADF2_ORYSJ	sp|Q9AY76|ADF2_ORYSJ	>sp|Q9AY76|ADF2_ORYSJ Actin-depolymerizing factor 2 OS=Oryza sativa subsp. japonica OX=39947 GN=ADF2 PE=2 SV=1	0.901307	3.6e-13	129.98	1	S	________MAFMRSHSNASSGMGVAPDIRDT	X;X;X;X;X;X;X;X;X;X;X;X;X;X;X;Phospho (STY);X;X;X;X;X;X;X;X;X;X;X;X;X;X;X	XXXXXXXXXXXXXPPPPPPPPPPPPPPPPXX	SHS(0.901)NAS(0.084)S(0.014)GMGVAPDIR	3	2	-0.12047			14904;14905	14904	-0.792982	-0.757463	-0.692884	-0.2745	0.0572767	-0.156218	0.00355332	-0.623296	0.649186
Q9ST27	PHOT2	sp|Q9ST27|PHOT2_ORYSJ	69	sp|Q9ST27|PHOT2_ORYSJ	sp|Q9ST27|PHOT2_ORYSJ	>sp|Q9ST27|PHOT2_ORYSJ Phototropin-2 OS=Oryza sativa subsp. japonica OX=39947 GN=PHOT2 PE=1 SV=1	0.995488	0.00137291	72.467	1	S	PVAPATAGRDSGGTGSGKSSVDGGVGRASHD	X;X;X;X;X;X;X;X;X;X;X;X;X;X;X;Phospho (STY);X;X;X;X;X;X;X;X;X;X;X;X;X;X;X	XXXXXXXXXPPPPPPPPPXXXXXXXXXXXXX	DSGGT(0.005)GS(0.995)GK	7	2	0.4551			3359;3360;3361	3359	0.0713374	0.181761	0.00861437	1.17251	1.21245	1.22015	2.9606e-05	-1.11447	0.461862
Q9ST27	PHOT2	sp|Q9ST27|PHOT2_ORYSJ;tr|A0A0P0W8S4|A0A0P0W8S4_ORYSJ	503;367	sp|Q9ST27|PHOT2_ORYSJ	sp|Q9ST27|PHOT2_ORYSJ	>sp|Q9ST27|PHOT2_ORYSJ Phototropin-2 OS=Oryza sativa subsp. japonica OX=39947 GN=PHOT2 PE=1 SV=1;>tr|A0A0P0W8S4|A0A0P0W8S4_ORYSJ Os04g0304200 protein (Fragment) OS=Oryza sativa subsp. japonica OX=39947 GN=Os04g0304200 PE=4 SV=1	0.999981	2.63e-18	217.83	1	S	QLDGSDHVEPLRNRLSENTEIQSAKLVKATA	X;X;X;X;X;X;X;X;X;X;X;X;X;X;X;Phospho (STY);X;X;X;X;X;X;X;X;X;X;X;X;X;X;X	XXXXXXXXXXXXPPPPPPPPPPPPPXXXXXX	NRLS(1)ENTEIQSAK	4	2	-0.45045			10869;12456;12457;12458;12459;12460;12461;12462;12463;12464	12459	2.36541	2.41123	2.29357	3.12946	3.0744	3.13562	4.33227e-05	-0.756425	0.591961
A0A0N7KJ94	Os04g0485300	tr|A0A0N7KJ94|A0A0N7KJ94_ORYSJ;tr|Q7X7I6|Q7X7I6_ORYSJ	13;13	tr|A0A0N7KJ94|A0A0N7KJ94_ORYSJ	tr|A0A0N7KJ94|A0A0N7KJ94_ORYSJ	>tr|A0A0N7KJ94|A0A0N7KJ94_ORYSJ Glucose-6-phosphate dehydrogenase (NADP(+)) OS=Oryza sativa subsp. japonica OX=39947 GN=Os04g0485300 PE=3 SV=1;>tr|Q7X7I6|Q7X7I6_ORYSJ Glucose-6-phosphate 1-dehydrogenase OS=Oryza sativa subsp. japonica OX=39947 GN=Os04g0485	0.997546	0.0155891	113.29	1	S	___MSGGSSPRSRRSSFNSLSRDLELPSEQG	X;X;X;X;X;X;X;X;X;X;X;X;X;X;X;Phospho (STY);X;X;X;X;X;X;X;X;X;X;X;X;X;X;X	XXXXXXXXXXXXXPPPPPPPPPXXXXXXXXX	RS(0.002)S(0.998)FNSLSR	3	2	0.23957			13847;13848;13849	13848	-0.895538	-0.713614	-0.723685	-0.0807838	-0.146769	-0.200386	0.000749904	-0.634966	0.643956
A0A0P0XC48	Os08g0157600	tr|A0A0P0XC48|A0A0P0XC48_ORYSJ;tr|A0A0N7KPA9|A0A0N7KPA9_ORYSJ;tr|Q0J7W9|Q0J7W9_ORYSJ	25;238;623	tr|A0A0P0XC48|A0A0P0XC48_ORYSJ	tr|A0A0P0XC48|A0A0P0XC48_ORYSJ	>tr|A0A0P0XC48|A0A0P0XC48_ORYSJ Os08g0157600 protein (Fragment) OS=Oryza sativa subsp. japonica OX=39947 GN=Os08g0157600 PE=4 SV=1;>tr|A0A0N7KPA9|A0A0N7KPA9_ORYSJ Os08g0157600 protein (Fragment) OS=Oryza sativa subsp. japonica OX=39947 GN=Os08g0157600 PE=4	0.950131	1.37e-08	69.775	1	S	AFDALFSRERLPQSFSPPQVEGSKEISKEEE	X;X;X;X;X;X;X;X;X;X;X;X;X;X;X;Phospho (STY);X;X;X;X;X;X;X;X;X;X;X;X;X;X;X	XXXXXXXXPPPPPPPPPPPPPPPPXXXXXXX	ERLPQS(0.05)FS(0.95)PPQVEGSK	8	3	0.22873			4807;4808;4809;10750;10751	4809	0.253703	0.201433	0.168038	1.06254	1.0154	0.955616	3.53035e-05	-0.803462	0.572973
A0A0P0UZB5	Os01g0199700	tr|A0A0P0UZB5|A0A0P0UZB5_ORYSJ	45	tr|A0A0P0UZB5|A0A0P0UZB5_ORYSJ	tr|A0A0P0UZB5|A0A0P0UZB5_ORYSJ	>tr|A0A0P0UZB5|A0A0P0UZB5_ORYSJ Os01g0199700 protein OS=Oryza sativa subsp. japonica OX=39947 GN=Os01g0199700 PE=4 SV=1	1	0.000182232	61.282	1	S	EKPRRISMEGLQRAMSDLALELTKKQQVADA	X;X;X;X;X;X;X;X;X;X;X;X;X;X;X;Phospho (STY);X;X;X;X;X;X;X;X;X;X;X;X;X;X;X	XXXXXXXXXXXXXPPPPPPPPPPPXXXXXXX	AMS(1)DLALELTK	3	3	0.30456			1346;1347;1348	1347	-2.77452	-2.65462	-3.03044	-1.98469	-1.74736	-1.98749	0.00259081	-0.91335	0.530951
A0A0P0V4A6	Os01g0571166	tr|A0A0P0V4A6|A0A0P0V4A6_ORYSJ	75	tr|A0A0P0V4A6|A0A0P0V4A6_ORYSJ	tr|A0A0P0V4A6|A0A0P0V4A6_ORYSJ	>tr|A0A0P0V4A6|A0A0P0V4A6_ORYSJ Os01g0571166 protein OS=Oryza sativa subsp. japonica OX=39947 GN=Os01g0571166 PE=4 SV=1	1	0.00231381	33.015	1	S	QDDVKTTIGAILRRGSGVLEKAKEIGGHSEA	X;X;X;X;X;X;X;X;X;X;X;X;X;X;X;Phospho (STY);X;X;X;X;X;X;X;X;X;X;X;X;X;X;X	XXXXXXXXXXXXXPPPPPPPPXXXXXXXXXX	RGS(1)GVLEK	3	3	-1.3597			13491;13492;13493;13494	13494	1.32122	1.40872	1.32261	2.14183	2.01333	2.08233	0.000101867	-0.728309	0.603611
A0A0P0VE15	Os02g0122800	tr|A0A0P0VE15|A0A0P0VE15_ORYSJ;tr|Q6Z725|Q6Z725_ORYSJ	219;249	tr|A0A0P0VE15|A0A0P0VE15_ORYSJ	tr|A0A0P0VE15|A0A0P0VE15_ORYSJ	>tr|A0A0P0VE15|A0A0P0VE15_ORYSJ Os02g0122800 protein OS=Oryza sativa subsp. japonica OX=39947 GN=Os02g0122800 PE=4 SV=1;>tr|Q6Z725|Q6Z725_ORYSJ Os02g0122800 protein OS=Oryza sativa subsp. japonica OX=39947 GN=Os02g0122800 PE=2 SV=1	0.999602	1.66e-05	42.694	1;2	S	RGASPQGGNKGDERGSPPNNYDRERREASPG	X;X;X;Phospho (STY);X;X;X;X;X;X;X;X;X;X;X;Phospho (STY);X;X;X;X;X;X;X;X;X;X;X;X;Phospho (STY);X;X	XPPPPPPPPPPPPPPPPPPPPPPXXXXXXXX	GAS(0.997)PQGGNKGDERGS(1)PPNNY(0.003)DR	15	4	0.29509			5994;7402	5994	0.194563	0.33347	0.221158	0.941575	0.900805	0.751048	0.00102628	-0.614746	0.653045
A0A0P0VF21	Os02g0159200	tr|A0A0P0VF21|A0A0P0VF21_ORYSJ;tr|Q6ETI1|Q6ETI1_ORYSJ	67;546	tr|A0A0P0VF21|A0A0P0VF21_ORYSJ	tr|A0A0P0VF21|A0A0P0VF21_ORYSJ	>tr|A0A0P0VF21|A0A0P0VF21_ORYSJ Os02g0159200 protein (Fragment) OS=Oryza sativa subsp. japonica OX=39947 GN=Os02g0159200 PE=4 SV=1;>tr|Q6ETI1|Q6ETI1_ORYSJ Os02g0159200 protein OS=Oryza sativa subsp. japonica OX=39947 GN=Os02g0159200 PE=2 SV=1	0.84923	0.0183419	14.682	1	S	NSVIDFGNLLPRAPSSHRKHRSRSAHPRSGG	X;X;X;X;X;X;X;X;X;X;X;X;X;X;X;Phospho (STY);X;X;X;X;X;X;X;X;X;X;X;X;X;X;X	XXXXXXXXXXXXPPPPPPPXXXXXXXXXXXX	APS(0.151)S(0.849)HRK	4	3	0.22361			1535	1535	-3.68174	-3.46191	-3.94676	-2.46271	-2.44662	-2.50218	0.000965834	-1.2263	0.427412
A0A0P0VGR3	Os02g0229400	tr|A0A0P0VGR3|A0A0P0VGR3_ORYSJ;tr|Q6H536|Q6H536_ORYSJ	210;277	tr|A0A0P0VGR3|A0A0P0VGR3_ORYSJ	tr|A0A0P0VGR3|A0A0P0VGR3_ORYSJ	>tr|A0A0P0VGR3|A0A0P0VGR3_ORYSJ Os02g0229400 protein (Fragment) OS=Oryza sativa subsp. japonica OX=39947 GN=Os02g0229400 PE=4 SV=1;>tr|Q6H536|Q6H536_ORYSJ Os02g0229400 protein OS=Oryza sativa subsp. japonica OX=39947 GN=Os02g0229400 PE=2 SV=1	0.99768	0.00364517	40.135	2	S	PEEGQSWIARPSKGPSILGSVLSLTSRHGSM	X;X;X;X;X;X;X;X;X;X;X;X;X;X;X;Phospho (STY);X;X;X;X;X;X;X;X;Phospho (STY);X;X;X;X;X;X	XXXXXXXXXXXXXPPPPPPPPPPPPPPXXXX	GPS(0.998)ILGS(0.003)VLS(0.04)LT(0.479)S(0.479)R	3	2	0.0022945			7175	7175	-5.91194	-5.13988	-5.97737	-4.35016	-4.17645	-4.40102	0.00787899	-1.36719	0.387646
A0A0P0VGR3	Os02g0229400	tr|A0A0P0VGR3|A0A0P0VGR3_ORYSJ;tr|Q6H536|Q6H536_ORYSJ	264;331	tr|A0A0P0VGR3|A0A0P0VGR3_ORYSJ	tr|A0A0P0VGR3|A0A0P0VGR3_ORYSJ	>tr|A0A0P0VGR3|A0A0P0VGR3_ORYSJ Os02g0229400 protein (Fragment) OS=Oryza sativa subsp. japonica OX=39947 GN=Os02g0229400 PE=4 SV=1;>tr|Q6H536|Q6H536_ORYSJ Os02g0229400 protein OS=Oryza sativa subsp. japonica OX=39947 GN=Os02g0229400 PE=2 SV=1	0.939863	8.28e-06	53.973	2	S	HAGGSMRSTLFPNFGSMFSVTDQHPKVDQWD	X;X;X;X;X;X;X;X;X;X;X;X;X;X;X;Phospho (STY);X;X;Phospho (STY);X;X;X;X;X;X;X;X;X;X;X;X	XXXXXXXPPPPPPPPPPPPPPPPPPPXXXXX	S(0.001)T(0.001)LFPNFGS(0.94)MFS(0.835)VT(0.224)DQHPK	9	3	-1.8225			16065;16066;16067;16068	16066	-2.30256	-2.2192	-2.59501	-1.56781	-1.70011	-1.65433	0.00370469	-0.731507	0.602275
A0A0P0VM23	Os02g0615800	tr|A0A0P0VM23|A0A0P0VM23_ORYSJ;tr|Q6K7X0|Q6K7X0_ORYSJ	284;662	tr|A0A0P0VM23|A0A0P0VM23_ORYSJ	tr|A0A0P0VM23|A0A0P0VM23_ORYSJ	>tr|A0A0P0VM23|A0A0P0VM23_ORYSJ Os02g0615800 protein (Fragment) OS=Oryza sativa subsp. japonica OX=39947 GN=Os02g0615800 PE=4 SV=1;>tr|Q6K7X0|Q6K7X0_ORYSJ Os02g0615800 protein OS=Oryza sativa subsp. japonica OX=39947 GN=Os02g0615800 PE=4 SV=1	0.999564	3.36e-08	148.35	1	S	LLEKMKPREKYISSQSFGENFLKVSYNDLAQ	X;X;X;X;X;X;X;X;X;X;X;X;X;X;X;Phospho (STY);X;X;X;X;X;X;X;X;X;X;X;X;X;X;X	XXXXXXXXXXPPPPPPPPPPPPPXXXXXXXX	YISSQS(1)FGENFLK	6	2	-0.30004			19865;19866;19867;19868;19869;19870;19871;19872;19873;19874;19875	19875	1.51703	1.60588	1.52111	2.53185	2.4822	2.54283	9.42347e-06	-0.970952	0.510169
A0A0P0VUZ1	Os03g0225500	tr|A0A0P0VUZ1|A0A0P0VUZ1_ORYSJ;tr|Q10PQ6|Q10PQ6_ORYSJ	542;542	tr|A0A0P0VUZ1|A0A0P0VUZ1_ORYSJ	tr|A0A0P0VUZ1|A0A0P0VUZ1_ORYSJ	>tr|A0A0P0VUZ1|A0A0P0VUZ1_ORYSJ Os03g0225500 protein (Fragment) OS=Oryza sativa subsp. japonica OX=39947 GN=Os03g0225500 PE=3 SV=1;>tr|Q10PQ6|Q10PQ6_ORYSJ Nup133 nucleoporin family protein, expressed OS=Oryza sativa subsp. japonica OX=39947 GN=LOC_Os03g124	1	1.46e-06	71.137	1	S	VGGVEPPERSLSRKGSCNEAVAEEKRRNQAF	X;X;X;X;X;X;X;X;X;X;X;X;X;X;X;Phospho (STY);X;X;X;X;X;X;X;X;X;X;X;X;X;X;X	XXXXXXXXXXXXXPPPPPPPPPPPPXXXXXX	KGS(1)CNEAVAEEK	3	3	0.29525			9169;9170;9171	9171	1.09886	1.14198	1.05495	1.7944	1.68224	1.67661	0.0001741	-0.619151	0.651054
A0A0P0W1J8	Os03g0686300	tr|A0A0P0W1J8|A0A0P0W1J8_ORYSJ	1077	tr|A0A0P0W1J8|A0A0P0W1J8_ORYSJ	tr|A0A0P0W1J8|A0A0P0W1J8_ORYSJ	>tr|A0A0P0W1J8|A0A0P0W1J8_ORYSJ Os03g0686300 protein (Fragment) OS=Oryza sativa subsp. japonica OX=39947 GN=Os03g0686300 PE=3 SV=1	0.992271	3.21e-05	95.397	1	S	MESENKVLRQQAVAISPTAKSLAAYPKSPFQ	X;X;X;X;X;X;X;X;X;X;X;X;X;X;X;Phospho (STY);X;X;X;X;X;X;X;X;X;X;X;X;X;X;X	XXXXXXXXXPPPPPPPPPPPXXXXXXXXXXX	QQAVAIS(0.992)PT(0.008)AK	7	3	0.65921			13091;13092;13093	13091	0.623313	0.554362	0.600802	1.24782	1.15884	1.24852	6.46433e-05	-0.625567	0.648165
A0A0P0WHB7	Os05g0107600	tr|A0A0P0WHB7|A0A0P0WHB7_ORYSJ;tr|Q0DLD4|Q0DLD4_ORYSJ	244;527	tr|A0A0P0WHB7|A0A0P0WHB7_ORYSJ	tr|A0A0P0WHB7|A0A0P0WHB7_ORYSJ	>tr|A0A0P0WHB7|A0A0P0WHB7_ORYSJ Os05g0107600 protein (Fragment) OS=Oryza sativa subsp. japonica OX=39947 GN=Os05g0107600 PE=4 SV=1;>tr|Q0DLD4|Q0DLD4_ORYSJ Os05g0107600 protein (Fragment) OS=Oryza sativa subsp. japonica OX=39947 GN=Os05g0107600 PE=4 SV=1	0.999727	0.00321891	43.484	1	S	SDALTVQRAFMGRAKSNASSRSKEHCYTTKV	X;X;X;X;X;X;X;X;X;X;X;X;X;X;X;Phospho (STY);X;X;X;X;X;X;X;X;X;X;X;X;X;X;X	XXXXXXXXXXXXXPPPPPPPPXXXXXXXXXX	AKS(1)NASSR	3	2	0.20765			1037;1039;1040;1041	1039	-0.557498	-0.635623	-0.641753	0.140154	0.0931094	0.124596	1.78597e-05	-0.730911	0.602523
A0A0P0WJI6	Os05g0232200	tr|A0A0P0WJI6|A0A0P0WJI6_ORYSJ	156	tr|A0A0P0WJI6|A0A0P0WJI6_ORYSJ	tr|A0A0P0WJI6|A0A0P0WJI6_ORYSJ	>tr|A0A0P0WJI6|A0A0P0WJI6_ORYSJ Os05g0232200 protein (Fragment) OS=Oryza sativa subsp. japonica OX=39947 GN=Os05g0232200 PE=4 SV=1	0.983388	3.09e-05	115.93	1	S	ISNISREGDESSVRKSMSLDDLQEKAVFSAI	X;X;X;X;X;X;X;X;X;X;X;X;X;X;X;Phospho (STY);X;X;X;X;X;X;X;X;X;X;X;X;X;X;X	XXXXXXXXXXXXXXXPPPPPPPPPPXXXXXX	S(0.983)MS(0.017)LDDLQEK	1	3	-0.68684			15305;15307;15308;15311;15312	15307	0.468269	0.539426	0.355207	1.44661	1.4144	1.34114	0.000107779	-0.946417	0.51892
A0A0P0WW21	Os06g0334300	tr|A0A0P0WW21|A0A0P0WW21_ORYSJ;tr|Q5Z755|Q5Z755_ORYSJ	238;851	tr|A0A0P0WW21|A0A0P0WW21_ORYSJ	tr|A0A0P0WW21|A0A0P0WW21_ORYSJ	>tr|A0A0P0WW21|A0A0P0WW21_ORYSJ Os06g0334300 protein (Fragment) OS=Oryza sativa subsp. japonica OX=39947 GN=Os06g0334300 PE=4 SV=1;>tr|Q5Z755|Q5Z755_ORYSJ Os06g0334300 protein OS=Oryza sativa subsp. japonica OX=39947 GN=Os06g0334300 PE=4 SV=1	1	0.0204518	32.012	1	S	EPDHDLSDVSMSRVFSQLIKAEGR_______	X;X;X;X;X;X;X;X;X;X;X;X;X;X;X;Phospho (STY);X;X;X;X;X;X;X;X;X;X;X;X;X;X;X	XXXXXXXXXXXXXPPPPPPPXXXXXXXXXXX	VFS(1)QLIK	3	2	0.18177			18260;18261	18261	-0.952975	-0.929247	-0.903064	-0.18139	-0.0483064	-0.141346	4.36066e-05	-0.804748	0.572462
A0A0P0XDG3	Os08g0230200	tr|A0A0P0XDG3|A0A0P0XDG3_ORYSJ	184	tr|A0A0P0XDG3|A0A0P0XDG3_ORYSJ	tr|A0A0P0XDG3|A0A0P0XDG3_ORYSJ	>tr|A0A0P0XDG3|A0A0P0XDG3_ORYSJ Os08g0230200 protein (Fragment) OS=Oryza sativa subsp. japonica OX=39947 GN=Os08g0230200 PE=4 SV=1	0.882447	1.43e-05	69.828	1;2	S	NSSGAPRKVSGPLDPSVSMKMRATSFAHNPA	X;X;X;X;X;X;X;X;X;Phospho (STY);X;X;X;X;X;Phospho (STY);X;Phospho (STY);Oxidation (M);X;X;X;X;X;Phospho (STY);X;X;X;X;X;X	XXXXXXXPPPPPPPPPPPPPXXXXXXXXXXX	KVS(0.316)GPLDPS(0.882)VS(0.802)MK	9	3	0.42077			9573;9581;9582;9583;9584	9582	2.39857	2.3936	2.38209	3.07893	3.00701	3.01485	1.03005e-05	-0.642175	0.640746
A0A0P0XDG3	Os08g0230200	tr|A0A0P0XDG3|A0A0P0XDG3_ORYSJ	186	tr|A0A0P0XDG3|A0A0P0XDG3_ORYSJ	tr|A0A0P0XDG3|A0A0P0XDG3_ORYSJ	>tr|A0A0P0XDG3|A0A0P0XDG3_ORYSJ Os08g0230200 protein (Fragment) OS=Oryza sativa subsp. japonica OX=39947 GN=Os08g0230200 PE=4 SV=1	0.955217	2.46e-05	65.476	1;2	S	SGAPRKVSGPLDPSVSMKMRATSFAHNPAVT	X;X;X;X;X;X;X;Phospho (STY);X;X;X;X;X;Phospho (STY);X;Phospho (STY);Oxidation (M);X;X;X;X;X;Phospho (STY);X;X;X;X;X;X;X;X	XXXXXPPPPPPPPPPPPPXXXXXXXXXXXXX	KVS(0.959)GPLDPS(0.086)VS(0.955)MK	11	3	-1.1012			9576;9579;9581;9582;9585	9585	2.14434	2.18569	2.19441	2.77437	2.78657	2.802	3.8681e-06	-0.612832	0.653912
A0A0P0XJ24	Os09g0135400	tr|A0A0P0XJ24|A0A0P0XJ24_ORYSJ	252	tr|A0A0P0XJ24|A0A0P0XJ24_ORYSJ	tr|A0A0P0XJ24|A0A0P0XJ24_ORYSJ	>tr|A0A0P0XJ24|A0A0P0XJ24_ORYSJ Os09g0135400 protein (Fragment) OS=Oryza sativa subsp. japonica OX=39947 GN=Os09g0135400 PE=4 SV=1	0.999064	0.00304129	47.357	1	S	QQSVPPMSKFNPSPPSPKLVPFSNSPPSSAN	X;X;X;X;X;X;X;X;X;X;X;X;X;X;X;Phospho (STY);X;X;X;X;X;X;X;X;Phospho (STY);X;X;X;X;X;X	XXXXXXXXXPPPPPPPPPXXXXXXXXXXXXX	FNPS(0.001)PPS(0.999)PK	7	3	0.052295			5654;5655;5656;5657;5658;5659	5657	1.48834	1.48132	1.44252	2.16227	2.12027	2.14221	3.61297e-06	-0.670858	0.628133
A3CE59	LOC_Os12g01449	tr|A3CE59|A3CE59_ORYSJ;tr|B9GBE2|B9GBE2_ORYSJ	445;445	tr|A3CE59|A3CE59_ORYSJ;tr|B9GBE2|B9GBE2_ORYSJ	tr|A3CE59|A3CE59_ORYSJ	>tr|A3CE59|A3CE59_ORYSJ Expressed protein OS=Oryza sativa subsp. japonica OX=39947 GN=LOC_Os12g01449 PE=4 SV=1;>tr|B9GBE2|B9GBE2_ORYSJ Os11g0105750 protein OS=Oryza sativa subsp. japonica OX=39947 GN=Os11g0105750 PE=4 SV=1	0.995074	0.0108199	29.128	1	S	ASPTQFFTSDSPKSASQKPKGPLEALMLRNA;ASPTQSFTSDSPKSASQKPKGPLEALMLRNA	X;Phospho (STY);X;Phospho (STY);X;Phospho (STY);X;Phospho (STY);Phospho (STY);X;Phospho (STY);X;X;X;X;Phospho (STY);X;X;X;X;X;X;X;X;X;X;X;X;X;X;X	XXXXXXXXXXXXXPPPPPPPXXXXXXXXXXX	S(0.005)AS(0.995)QKPK	3	3	0.50758			14231	14231	-0.276039	-0.187051	-0.322084	0.538981	0.470504	0.485922	7.02949e-05	-0.760194	0.590417
B9GBE2	Os11g0105750	tr|B9GBE2|B9GBE2_ORYSJ	350	tr|B9GBE2|B9GBE2_ORYSJ	tr|B9GBE2|B9GBE2_ORYSJ	>tr|B9GBE2|B9GBE2_ORYSJ Os11g0105750 protein OS=Oryza sativa subsp. japonica OX=39947 GN=Os11g0105750 PE=4 SV=1	0.999981	0.00285467	47.71	2	S	APSEKISARYLNKTLSPKSRERAKLLMLEYA	X;X;X;X;X;X;X;X;X;X;X;X;X;Phospho (STY);X;Phospho (STY);X;X;X;X;X;X;X;X;X;X;Oxidation (M);X;X;X;X	XXXXXXXXXPPPPPPPPPXXXXXXXXXXXXX	YLNKT(1)LS(1)PK	7	4	-0.042638			19927;19929;19930	19929	0.65185	0.760232	0.657866	1.33146	1.32918	1.3351	5.32347e-05	-0.641929	0.640856
Q0DG76	Os05g0549100	tr|Q0DG76|Q0DG76_ORYSJ	523	tr|Q0DG76|Q0DG76_ORYSJ	tr|Q0DG76|Q0DG76_ORYSJ	>tr|Q0DG76|Q0DG76_ORYSJ Os05g0549100 protein OS=Oryza sativa subsp. japonica OX=39947 GN=Os05g0549100 PE=4 SV=1	1	0.00281791	37.428	1	S	EIKPKKGSARRNLLASVLRVQRKVVRTINES	X;X;X;X;X;X;X;X;X;X;X;X;X;X;X;Phospho (STY);X;X;X;X;X;X;X;X;X;X;Phospho (STY);X;X;X;Phospho (STY)	XXXXXXXXXXXPPPPPPPPXXXXXXXXXXXX	NLLAS(1)VLR	5	2	0.59246			12221;12222;12223	12223	-1.01745	-0.972087	-0.991261	0.151242	0.0103548	0.0032401	3.04443e-05	-1.04854	0.483456
Q0DK70	Os05g0188100	tr|Q0DK70|Q0DK70_ORYSJ	26	tr|Q0DK70|Q0DK70_ORYSJ	tr|Q0DK70|Q0DK70_ORYSJ	>tr|Q0DK70|Q0DK70_ORYSJ Os05g0188100 protein OS=Oryza sativa subsp. japonica OX=39947 GN=Os05g0188100 PE=2 SV=1	0.867401	0.000685121	58.309	1	S	RNPHKAPADYRSDRKSASGMSGEPKKGGRGG	X;X;X;X;X;X;X;X;X;X;X;X;X;X;X;Phospho (STY);X;X;X;X;X;X;X;X;X;X;X;X;X;X;X	XXXXXXXXXXXXXXXPPPPPPPPPPXXXXXX	S(0.867)AS(0.125)GMS(0.007)GEPK	1	2	-0.29418			14197	14197	-1.0436	-0.928777	-1.11326	-0.0532039	-0.102265	-0.0430237	7.11892e-05	-0.96238	0.513209
Q0DMP3	Os03g0800000	tr|Q0DMP3|Q0DMP3_ORYSJ;tr|Q851R0|Q851R0_ORYSJ	390;625	tr|Q0DMP3|Q0DMP3_ORYSJ	tr|Q0DMP3|Q0DMP3_ORYSJ	>tr|Q0DMP3|Q0DMP3_ORYSJ Os03g0800000 protein (Fragment) OS=Oryza sativa subsp. japonica OX=39947 GN=Os03g0800000 PE=4 SV=1;>tr|Q851R0|Q851R0_ORYSJ Nodulin family protein, putative, expressed OS=Oryza sativa subsp. japonica OX=39947 GN=LOC_Os03g58580 PE=4 S	0.999996	1.02e-07	90.294	1	S	DTAAEKRSTLVNDEDSKKG____________	X;X;X;X;X;X;X;X;X;X;X;X;X;X;X;Phospho (STY);X;X;X;X;X;X;X;X;X;X;X;X;X;X;X	XXXXXXXPPPPPPPPPPPPXXXXXXXXXXXX	STLVNDEDS(1)KKG	9	3	-2.243			16071;16072;16073	16071	0.741688	0.885266	0.776497	1.69176	1.63444	1.61376	6.6913e-05	-0.845501	0.556517
Q0IZR7	Os09g0553900	tr|Q0IZR7|Q0IZR7_ORYSJ	319	tr|Q0IZR7|Q0IZR7_ORYSJ	tr|Q0IZR7|Q0IZR7_ORYSJ	>tr|Q0IZR7|Q0IZR7_ORYSJ Os09g0553900 protein OS=Oryza sativa subsp. japonica OX=39947 GN=Os09g0553900 PE=2 SV=1	0.996516	7.61e-07	92.641	2;3	S	INSSSSSSSLFARKQSKLSFSITSPKVSRSE	X;X;X;X;Phospho (STY);Phospho (STY);Phospho (STY);X;Phospho (STY);X;X;X;X;X;X;Phospho (STY);X;X;Phospho (STY);X;Phospho (STY);X;Phospho (STY);Phospho (STY);X;X;X;X;X;Phospho (STY);X	XXXXXXXXXXXXXPPPPPPPPPPPPPXXXXX	KQS(0.997)KLS(0.546)FS(0.396)IT(0.118)S(0.944)PK	3	4	-2.3147			9392;9394;9400;9401;9402;9403;9405;9410	9405	1.65567	1.70056	1.60173	2.73993	2.64844	2.71663	1.20945e-05	-1.04901	0.483299
Q0IZR7	Os09g0553900	tr|Q0IZR7|Q0IZR7_ORYSJ	322	tr|Q0IZR7|Q0IZR7_ORYSJ	tr|Q0IZR7|Q0IZR7_ORYSJ	>tr|Q0IZR7|Q0IZR7_ORYSJ Os09g0553900 protein OS=Oryza sativa subsp. japonica OX=39947 GN=Os09g0553900 PE=2 SV=1	0.993983	1.33e-08	113.32	2;3	S	SSSSSSLFARKQSKLSFSITSPKVSRSEPKL	X;Phospho (STY);Phospho (STY);Phospho (STY);X;Phospho (STY);X;X;X;X;X;X;Phospho (STY);X;X;Phospho (STY);X;Phospho (STY);X;Phospho (STY);Phospho (STY);X;X;X;X;X;Phospho (STY);X;X;X;X	XXXXXXXXXXPPPPPPPPPPPPPXXXXXXXX	KQS(0.006)KLS(0.994)FS(0.537)IT(0.537)S(0.926)PK	6	3	-0.49024			9390;9394;9396;9397;9398;9399;9404;9405;9406;9407;9408;9409;9410;13167;13168;13169;13170	9404	2.77342	2.73237	2.71004	3.75752	3.70967	3.72254	1.86493e-06	-0.991297	0.503025
Q0IZR7	Os09g0553900	tr|Q0IZR7|Q0IZR7_ORYSJ	324	tr|Q0IZR7|Q0IZR7_ORYSJ	tr|Q0IZR7|Q0IZR7_ORYSJ	>tr|Q0IZR7|Q0IZR7_ORYSJ Os09g0553900 protein OS=Oryza sativa subsp. japonica OX=39947 GN=Os09g0553900 PE=2 SV=1	0.963618	1.33e-08	113.32	1;2;3	S	SSSSLFARKQSKLSFSITSPKVSRSEPKLTP	Phospho (STY);Phospho (STY);X;Phospho (STY);X;X;X;X;X;X;Phospho (STY);X;X;Phospho (STY);X;Phospho (STY);X;Phospho (STY);Phospho (STY);X;X;X;X;X;Phospho (STY);X;X;X;X;Phospho (STY);X	XXXXXXXXPPPPPPPPPPPPPXXXXXXXXXX	KQS(0.029)KLS(0.973)FS(0.964)IT(0.167)S(0.867)PK	8	3	-0.37027			9393;9402;9403;9404;9406;9407;9408;9409;10905;10907;10908;10909;10910;10911;10912;10913;10914;10915	9409	2.81479	2.83326	2.73288	3.89685	3.80645	3.81122	1.64045e-05	-1.04453	0.484803
Q0IZR7	Os09g0553900	tr|Q0IZR7|Q0IZR7_ORYSJ	327	tr|Q0IZR7|Q0IZR7_ORYSJ	tr|Q0IZR7|Q0IZR7_ORYSJ	>tr|Q0IZR7|Q0IZR7_ORYSJ Os09g0553900 protein OS=Oryza sativa subsp. japonica OX=39947 GN=Os09g0553900 PE=2 SV=1	0.980511	6.88e-12	95.307	1;2;3	S	SLFARKQSKLSFSITSPKVSRSEPKLTPTKG	Phospho (STY);X;X;X;X;X;X;Phospho (STY);X;X;Phospho (STY);X;Phospho (STY);X;Phospho (STY);Phospho (STY);X;X;X;X;X;Phospho (STY);X;X;X;X;Phospho (STY);X;Phospho (STY);X;X	XXXXXPPPPPPPPPPPPPXXXXXXXXXXXXX	KQS(0.09)KLS(0.91)FS(0.81)IT(0.209)S(0.981)PK	11	4	-0.29487			9391;9393;9395;9396;9397;9398;9399;9400;9401;9402;9403;9404;9405;9406;9407;9409;10894;10895;10896;10897;10898;10899;10900;10901;10904;10906;10909;10910;10911;10912;10913;10914;10915;13167;13168;13169	9406	4.24972	4.24141	4.19911	4.92955	4.86715	4.87496	1.24261e-05	-0.660474	0.63267
Q0IZR7	Os09g0553900	tr|Q0IZR7|Q0IZR7_ORYSJ	41	tr|Q0IZR7|Q0IZR7_ORYSJ	tr|Q0IZR7|Q0IZR7_ORYSJ	>tr|Q0IZR7|Q0IZR7_ORYSJ Os09g0553900 protein OS=Oryza sativa subsp. japonica OX=39947 GN=Os09g0553900 PE=2 SV=1	0.920629	3.79e-12	101.63	1	S	HTNRRTASLALPRSASEVNGGGADVVRAESR	X;X;X;X;X;X;X;Phospho (STY);X;X;X;X;X;X;X;Phospho (STY);X;X;X;X;X;X;X;X;X;X;X;X;X;X;X	XXXXXXXXXXXXXPPPPPPPPPPPPPPXXXX	S(0.079)AS(0.921)EVNGGGADVVR	3	2	0.51009			14159;14160;14161	14161	0.655214	0.713011	0.673811	1.3014	1.25315	1.26888	1.15745e-05	-0.593795	0.662597
Q0IZR7	Os09g0553900	tr|Q0IZR7|Q0IZR7_ORYSJ	104	tr|Q0IZR7|Q0IZR7_ORYSJ	tr|Q0IZR7|Q0IZR7_ORYSJ	>tr|Q0IZR7|Q0IZR7_ORYSJ Os09g0553900 protein OS=Oryza sativa subsp. japonica OX=39947 GN=Os09g0553900 PE=2 SV=1	0.984731	2.67e-26	168.64	1	S	DDGDKGARRAPSKSQSFAAVTTPGGEAAAVA	X;X;X;X;X;X;X;X;X;X;X;X;X;X;X;Phospho (STY);X;X;X;X;X;X;X;X;X;X;X;X;X;X;X	XXXXXXXXXXXXXPPPPPPPPPPPPPPPPPP	S(0.015)QS(0.985)FAAVT(0.001)TPGGEAAAVAGEK	3	2	0.13492			15593;15594;15596;15598;15599;15600;15603;15604;15605	15600	2.58162	2.68478	2.55343	3.60745	3.51387	3.54194	4.07873e-05	-0.947809	0.518419
Q0IZR7	Os09g0553900	tr|Q0IZR7|Q0IZR7_ORYSJ	516	tr|Q0IZR7|Q0IZR7_ORYSJ	tr|Q0IZR7|Q0IZR7_ORYSJ	>tr|Q0IZR7|Q0IZR7_ORYSJ Os09g0553900 protein OS=Oryza sativa subsp. japonica OX=39947 GN=Os09g0553900 PE=2 SV=1	0.996806	0.00209651	41.067	2	S	LLEQGDGKATLAKSVSSLKSGAKRDTGGAAD	X;X;X;X;X;X;X;X;X;X;X;X;X;X;X;Phospho (STY);Phospho (STY);X;X;X;X;X;X;X;X;X;X;X;X;X;X	XXXXXXXXXXXXXPPPPPPPPPPXXXXXXXX	S(0.007)VS(0.997)S(0.992)LKS(0.004)GAK	3	3	0.28813			16272;16273	16272	-0.369701	-0.346156	-0.434074	0.501604	0.426366	0.387059	4.28183e-05	-0.821653	0.565793
Q0IZR7	Os09g0553900	tr|Q0IZR7|Q0IZR7_ORYSJ	517	tr|Q0IZR7|Q0IZR7_ORYSJ	tr|Q0IZR7|Q0IZR7_ORYSJ	>tr|Q0IZR7|Q0IZR7_ORYSJ Os09g0553900 protein OS=Oryza sativa subsp. japonica OX=39947 GN=Os09g0553900 PE=2 SV=1	0.993718	0.00209651	41.067	2	S	LEQGDGKATLAKSVSSLKSGAKRDTGGAADA	X;X;X;X;X;X;X;X;X;X;X;X;X;X;Phospho (STY);Phospho (STY);X;X;X;X;X;X;X;X;X;X;X;X;X;X;X	XXXXXXXXXXXXPPPPPPPPPPXXXXXXXXX	S(0.013)VS(0.988)S(0.994)LKS(0.005)GAK	4	3	-0.032488			16272;16273	16273	-0.369701	-0.346156	-0.434074	0.501604	0.426366	0.387059	4.28183e-05	-0.821653	0.565793
Q0IZR7	Os09g0553900	tr|Q0IZR7|Q0IZR7_ORYSJ	33	tr|Q0IZR7|Q0IZR7_ORYSJ	tr|Q0IZR7|Q0IZR7_ORYSJ	>tr|Q0IZR7|Q0IZR7_ORYSJ Os09g0553900 protein OS=Oryza sativa subsp. japonica OX=39947 GN=Os09g0553900 PE=2 SV=1	0.991885	0.00275979	43.434	1	S	LSHTLYQAHTNRRTASLALPRSASEVNGGGA	X;X;X;X;X;X;X;X;X;X;X;X;X;X;X;Phospho (STY);X;X;X;X;X;X;X;Phospho (STY);X;X;X;X;X;X;X	XXXXXXXXXXXXXPPPPPPPPXXXXXXXXXX	T(0.008)AS(0.992)LALPR	3	2	0.043023			16553;16554;16555;16556;16557;16558;16559	16556	1.06733	1.02251	0.98593	1.70168	1.77502	1.64977	9.39888e-05	-0.683564	0.622625
Q0J2H4	Os09g0343200	tr|Q0J2H4|Q0J2H4_ORYSJ	95	tr|Q0J2H4|Q0J2H4_ORYSJ	tr|Q0J2H4|Q0J2H4_ORYSJ	>tr|Q0J2H4|Q0J2H4_ORYSJ Os09g0343200 protein OS=Oryza sativa subsp. japonica OX=39947 GN=Os09g0343200 PE=4 SV=1	1	3.34e-05	69.794	1	S	CSGKGDAAAMLMMMASKKEDAAKPSTASMNP	X;X;X;X;X;X;X;X;X;X;X;Oxidation (M);X;X;X;Phospho (STY);X;X;X;X;X;X;X;X;X;X;X;X;X;X;X	XXXXPPPPPPPPPPPPPXXXXXXXXXXXXXX	GDAAAMLMMMAS(1)K	12	2	-0.0056933			6028;6029;6030	6030	-2.17463	-2.15441	-2.34052	-1.58906	-1.38883	-1.71299	0.00406729	-0.659559	0.633072
Q0JLN9	Os01g0585300	tr|Q0JLN9|Q0JLN9_ORYSJ	80	tr|Q0JLN9|Q0JLN9_ORYSJ	tr|Q0JLN9|Q0JLN9_ORYSJ	>tr|Q0JLN9|Q0JLN9_ORYSJ Os01g0585300 protein OS=Oryza sativa subsp. japonica OX=39947 GN=Os01g0585300 PE=2 SV=1	0.93303	0.000767409	74.029	1	S	VEVDVFKKLERRKVLSTVEKAGLLSRAEELG	X;X;X;X;X;X;X;X;X;X;X;X;X;X;X;Phospho (STY);X;X;X;X;X;X;X;X;X;X;X;X;X;X;X	XXXXXXXXXXXXPPPPPPPPXXXXXXXXXXX	KVLS(0.933)T(0.067)VEK	4	3	-0.10643			9536;9538;9541	9536	1.1725	1.16023	1.14309	1.7534	1.78046	1.80283	3.09555e-06	-0.62029	0.65054
Q10DR8	LOC_Os03g51250	tr|Q10DR8|Q10DR8_ORYSJ	325	tr|Q10DR8|Q10DR8_ORYSJ	tr|Q10DR8|Q10DR8_ORYSJ	>tr|Q10DR8|Q10DR8_ORYSJ Adenylyl cyclase-associated protein OS=Oryza sativa subsp. japonica OX=39947 GN=LOC_Os03g51250 PE=2 SV=1	0.993628	0.0090925	34.574	1	S	TAAPAAAPEKTSRAGSFSFKSGPPKLELQMG	X;X;X;X;X;X;X;X;X;X;X;X;X;X;X;Phospho (STY);X;X;X;X;X;X;X;X;X;X;X;X;X;X;X	XXXXXXXXXXXXXPPPPPPPXXXXXXXXXXX	AGS(0.994)FS(0.006)FK	3	3	-0.40667			818;819;820;821;822;823;824;825	819	3.43683	3.48739	3.47581	4.11123	4.01824	4.02866	6.01494e-05	-0.586031	0.666173
Q10QF7	LOC_Os03g10180	tr|Q10QF7|Q10QF7_ORYSJ	34	tr|Q10QF7|Q10QF7_ORYSJ	tr|Q10QF7|Q10QF7_ORYSJ	>tr|Q10QF7|Q10QF7_ORYSJ Expressed protein OS=Oryza sativa subsp. japonica OX=39947 GN=LOC_Os03g10180 PE=2 SV=1	0.82554	1.25e-07	90.853	1	S	GGPPRRSSGHDSLRRSSMDSSFGSATKGRSG	X;X;X;X;X;X;X;X;X;X;X;X;X;X;X;Phospho (STY);X;Oxidation (M);X;X;X;X;X;X;X;X;X;X;X;X;X	XXXXXXXXXXXXXXPPPPPPPPPPPPPXXXX	S(0.826)S(0.119)MDS(0.046)S(0.01)FGSATK	1	2	-0.35148			13858;15752;15754	15754	0.477164	0.43333	0.455176	1.10337	1.13388	0.939367	0.000612047	-0.603651	0.658086
Q10QF7	LOC_Os03g10180	tr|Q10QF7|Q10QF7_ORYSJ	35	tr|Q10QF7|Q10QF7_ORYSJ	tr|Q10QF7|Q10QF7_ORYSJ	>tr|Q10QF7|Q10QF7_ORYSJ Expressed protein OS=Oryza sativa subsp. japonica OX=39947 GN=LOC_Os03g10180 PE=2 SV=1	0.976126	1.36e-07	119.41	1	S	GPPRRSSGHDSLRRSSMDSSFGSATKGRSGA	X;X;X;X;X;X;X;X;X;X;X;X;X;X;X;Phospho (STY);X;X;X;X;X;X;X;X;X;X;X;X;X;X;X	XXXXXXXXXXXXXPPPPPPPPPPPPPXXXXX	RS(0.024)S(0.976)MDSSFGSATK	3	2	0.15956			13856;13858;13859;13861;15756	13861	1.26975	1.31203	1.21794	2.13352	2.10069	2.0342	3.27196e-05	-0.822899	0.565305
Q2QN76	LOC_Os12g38730	tr|Q2QN76|Q2QN76_ORYSJ;tr|A0A0P0YBQ4|A0A0P0YBQ4_ORYSJ	222;48	tr|Q2QN76|Q2QN76_ORYSJ	tr|Q2QN76|Q2QN76_ORYSJ	>tr|Q2QN76|Q2QN76_ORYSJ Expressed protein OS=Oryza sativa subsp. japonica OX=39947 GN=LOC_Os12g38730 PE=4 SV=2;>tr|A0A0P0YBQ4|A0A0P0YBQ4_ORYSJ Os12g0576300 protein (Fragment) OS=Oryza sativa subsp. japonica OX=39947 GN=Os12g0576300 PE=4 SV=1	0.781434	1.84e-08	62.713	1	S	PVPFHIGFEKEGRRNSSEMVESVIGIAPLPE	X;X;X;X;X;X;X;X;X;X;X;X;X;X;X;Phospho (STY);X;X;X;X;X;X;X;X;X;X;X;X;X;X;X	XXXXXXXXXXXXXPPPPPPPPPPPPPPPPPP	RNS(0.781)S(0.216)EMVES(0.002)VIGIAPLPELK	3	3	-0.67225			13653	13653	-3.79079	-3.83274	-3.59049	-3.12191	-3.30947	-2.93394	0.00944835	-0.616233	0.652372
Q2QNZ9	LOC_Os12g36180	tr|Q2QNZ9|Q2QNZ9_ORYSJ	749	tr|Q2QNZ9|Q2QNZ9_ORYSJ	tr|Q2QNZ9|Q2QNZ9_ORYSJ	>tr|Q2QNZ9|Q2QNZ9_ORYSJ Expressed protein OS=Oryza sativa subsp. japonica OX=39947 GN=LOC_Os12g36180 PE=4 SV=1	0.96858	0.000305586	51.488	1	S	NSQTQNRGAASSASASMRKASSTTNIADDLS	X;X;X;X;X;X;X;X;X;X;X;X;X;X;X;Phospho (STY);X;X;X;X;X;X;X;X;X;X;X;X;X;X;X	XXXXXXXPPPPPPPPPPPXXXXXXXXXXXXX	GAAS(0.001)S(0.003)AS(0.028)AS(0.969)MR	9	2	-0.5137			5902;5903;5904	5903	0.030687	0.078653	0.0765279	0.603245	0.696249	0.713118	8.48305e-05	-0.608915	0.65569
Q2QT46	LOC_Os12g21890	tr|Q2QT46|Q2QT46_ORYSJ	121	tr|Q2QT46|Q2QT46_ORYSJ	tr|Q2QT46|Q2QT46_ORYSJ	>tr|Q2QT46|Q2QT46_ORYSJ Os12g0407500 protein OS=Oryza sativa subsp. japonica OX=39947 GN=LOC_Os12g21890 PE=2 SV=1	0.997635	0.000216584	53.796	2	S	KNTFSRLTSGLGLRLSPKGPQQDESAEGSTT	X;X;X;X;X;X;X;X;Phospho (STY);X;X;X;X;X;X;Phospho (STY);X;X;X;X;X;X;X;X;X;X;X;X;X;X;Phospho (STY)	XXXXXXPPPPPPPPPPPPXXXXXXXXXXXXX	LT(0.204)S(0.798)GLGLRLS(0.998)PK	10	3	0.094292			11133	11133	-2.08037	-1.98739	-2.26308	-1.38159	-1.43915	-1.48619	0.00145438	-0.674634	0.626491
Q339A6	LOC_Os10g22950	tr|Q339A6|Q339A6_ORYSJ	379	tr|Q339A6|Q339A6_ORYSJ	tr|Q339A6|Q339A6_ORYSJ	>tr|Q339A6|Q339A6_ORYSJ Anther ethylene-upregulated protein ER1, putative, expressed OS=Oryza sativa subsp. japonica OX=39947 GN=LOC_Os10g22950 PE=3 SV=1	0.977189	0.000242555	44.117	2	S	FLKTQSSNLSDILKDSFKKSDSFTRWMSKEL	X;X;X;X;X;Phospho (STY);Phospho (STY);X;X;Phospho (STY);X;X;X;X;X;Phospho (STY);X;X;X;X;X;X;X;X;X;X;X;X;X;X;X	XXXPPPPPPPPPPPPPPPPXXXXXXXXXXXX	T(0.044)QS(0.193)S(0.154)NLS(0.632)DILKDS(0.977)FKK	13	4	0.32585			17337;17339	17339	-1.23503	-1.0605	-1.10757	-0.278342	-0.361571	-0.463805	0.00051118	-0.766462	0.587857
Q339A6	LOC_Os10g22950	tr|Q339A6|Q339A6_ORYSJ	962	tr|Q339A6|Q339A6_ORYSJ	tr|Q339A6|Q339A6_ORYSJ	>tr|Q339A6|Q339A6_ORYSJ Anther ethylene-upregulated protein ER1, putative, expressed OS=Oryza sativa subsp. japonica OX=39947 GN=LOC_Os10g22950 PE=3 SV=1	0.993711	5.22e-05	77.386	1	S	KQTEERLQKALARVKSMVQYPEARDQYQRIL	X;X;X;X;X;X;X;X;X;X;X;X;X;X;X;Phospho (STY);X;X;X;X;X;X;X;X;X;X;X;X;X;X;X	XXXXXXXXXXXXXPPPPPPPPPPPXXXXXXX	VKS(0.994)MVQY(0.006)PEAR	3	2	-2.2037			18543;18544;18545;18546	18545	0.487189	0.4086	0.393432	1.05508	0.986951	1.01057	7.58547e-05	-0.587794	0.665359
Q33B25	LOC_Os10g05730	tr|Q33B25|Q33B25_ORYSJ	312	tr|Q33B25|Q33B25_ORYSJ	tr|Q33B25|Q33B25_ORYSJ	>tr|Q33B25|Q33B25_ORYSJ Armadillo/beta-catenin-like repeat family protein, expressed OS=Oryza sativa subsp. japonica OX=39947 GN=LOC_Os10g05730 PE=2 SV=1	0.873423	0.000940886	81.606	1	S	SGTIQEHSRYSVGSSSSKNSAAAPQHMTSLH	X;X;X;X;X;X;X;X;X;X;X;X;X;X;X;Phospho (STY);X;X;X;X;X;X;X;X;X;X;X;X;X;X;X	XXXXXXXXXPPPPPPPPPXXXXXXXXXXXXX	YSVGSS(0.048)S(0.873)S(0.078)K	7	2	-0.28741			20102;20103;20104	20103	0.827837	0.891827	0.870479	1.67623	1.59071	1.56096	4.55621e-05	-0.745918	0.596288
Q5JMS3	Os01g0964000	tr|Q5JMS3|Q5JMS3_ORYSJ;tr|Q5N9F2|Q5N9F2_ORYSJ	185;187	tr|Q5JMS3|Q5JMS3_ORYSJ	tr|Q5JMS3|Q5JMS3_ORYSJ	>tr|Q5JMS3|Q5JMS3_ORYSJ Os01g0964000 protein OS=Oryza sativa subsp. japonica OX=39947 GN=Os01g0964000 PE=2 SV=1;>tr|Q5N9F2|Q5N9F2_ORYSJ Os01g0866300 protein OS=Oryza sativa subsp. japonica OX=39947 GN=Os01g0866300 PE=2 SV=1	1	0.000208361	63.677	1	S	HKTIDSVLSRGERLDSLVEKSSDLSAASQMF	X;X;X;X;X;X;X;X;Phospho (STY);X;X;X;X;X;X;Phospho (STY);X;X;X;X;X;X;X;X;X;X;X;X;X;X;X	XXXXXXXXXXPPPPPPPPPPXXXXXXXXXXX	LDS(1)LVEK	3	2	-0.79883			6211;6212;9911;9912;9913	9913	1.38608	1.30808	1.33538	1.90836	2.04466	1.83358	0.00088468	-0.585685	0.666333
Q5N7Y1	Os01g0910900	tr|Q5N7Y1|Q5N7Y1_ORYSJ	85	tr|Q5N7Y1|Q5N7Y1_ORYSJ	tr|Q5N7Y1|Q5N7Y1_ORYSJ	>tr|Q5N7Y1|Q5N7Y1_ORYSJ Os01g0910900 protein OS=Oryza sativa subsp. japonica OX=39947 GN=Os01g0910900 PE=2 SV=1	1	0.00518667	29.352	1	S	EDFNTCTGEFRERKQSFLLKSD_________	X;X;X;X;X;X;X;X;X;X;X;X;X;X;X;Phospho (STY);X;X;X;X;X;X;X;X;X;X;X;X;X;X;X	XXXXXXXXXXXXXPPPPPPPXXXXXXXXXXX	KQS(1)FLLK	3	3	-0.3579			9387;9388;9389	9389	0.449401	0.370194	0.414829	1.0675	0.992451	1.05024	4.17652e-05	-0.625256	0.648305
Q5SNF8	Os01g0186700	tr|Q5SNF8|Q5SNF8_ORYSJ	322	tr|Q5SNF8|Q5SNF8_ORYSJ	tr|Q5SNF8|Q5SNF8_ORYSJ	>tr|Q5SNF8|Q5SNF8_ORYSJ Os01g0186700 protein OS=Oryza sativa subsp. japonica OX=39947 GN=Os01g0186700 PE=4 SV=1	0.854227	1.34e-16	106.83	1	S	EQLQHWQMNRRKLAFSTVGTPDYIAPEVLLK	X;X;X;X;X;X;X;X;X;X;X;X;X;X;X;Phospho (STY);X;X;X;X;X;X;X;X;X;X;X;X;X;X;X	XXXXXXXXXXXXPPPPPPPPPPPPPPPPPPP	LAFS(0.854)T(0.146)VGTPDYIAPEVLLK	4	3	-0.93634			9673;9674;9676	9676	-3.0809	-3.22668	-3.15324	-2.5083	-2.14196	-2.50068	0.00384434	-0.769955	0.586436
Q5VRF2	Os06g0168800	tr|Q5VRF2|Q5VRF2_ORYSJ	47	tr|Q5VRF2|Q5VRF2_ORYSJ	tr|Q5VRF2|Q5VRF2_ORYSJ	>tr|Q5VRF2|Q5VRF2_ORYSJ Os06g0168800 protein OS=Oryza sativa subsp. japonica OX=39947 GN=Os06g0168800 PE=2 SV=1	1	0.00446292	26.483	1	S	AAAASGADEKGAAGGSAKGSHVHDAAETRYL	X;X;X;X;X;X;X;X;X;X;X;X;X;X;X;Phospho (STY);X;X;X;X;X;X;X;X;X;X;X;X;X;X;X	XXXXXXXXXXPPPPPPPPXXXXXXXXXXXXX	GAAGGS(1)AK	6	2	-0.67257			5897;5898	5898	0.498321	0.344687	0.590469	1.19522	1.12166	1.12152	0.000911959	-0.668305	0.629246
Q5W6X0	Os05g0316800	tr|Q5W6X0|Q5W6X0_ORYSJ	23	tr|Q5W6X0|Q5W6X0_ORYSJ	tr|Q5W6X0|Q5W6X0_ORYSJ	>tr|Q5W6X0|Q5W6X0_ORYSJ Os05g0316800 protein OS=Oryza sativa subsp. japonica OX=39947 GN=Os05g0316800 PE=2 SV=1	1	0.0465555	29.263	1	S	PADSLAAGRSRRVGASMPRPKRVRVYFVDAD	X;X;X;X;X;X;X;X;X;X;X;X;X;X;X;Phospho (STY);X;X;X;X;X;X;X;X;X;X;X;X;X;X;X	XXXXXXXXXXXXPPPPPPPXXXXXXXXXXXX	VGAS(1)MPR	4	2	-3.0825			18283;18284	18284	0.393246	0.337644	0.367281	1.11577	1.18632	1.08067	2.63161e-05	-0.761526	0.589872
Q5Z9P6	Os06g0715500	tr|Q5Z9P6|Q5Z9P6_ORYSJ	253	tr|Q5Z9P6|Q5Z9P6_ORYSJ	tr|Q5Z9P6|Q5Z9P6_ORYSJ	>tr|Q5Z9P6|Q5Z9P6_ORYSJ Signal sequence receptor subunit alpha OS=Oryza sativa subsp. japonica OX=39947 GN=Os06g0715500 PE=2 SV=1	0.851659	8.26e-48	192.8	1	S	MDEWLEGTAFAQGSKSKKKK___________	X;X;X;X;X;X;X;X;X;X;X;X;X;X;X;Phospho (STY);X;X;X;X;X;X;X;X;X;X;X;X;X;X;X	PPPPPPPPPPPPPPPPPXXXXXXXXXXXXXX	VELGTGTTDANMDEWLEGT(0.003)AFAQGS(0.146)KS(0.852)K	27	4	-0.11051			18180;18181	18181	-1.13486	-0.946131	-1.21128	-0.476648	-0.413307	-0.367929	0.00133009	-0.67813	0.624975
Q5ZBA9	Os01g0603000	tr|Q5ZBA9|Q5ZBA9_ORYSJ	35	tr|Q5ZBA9|Q5ZBA9_ORYSJ	tr|Q5ZBA9|Q5ZBA9_ORYSJ	>tr|Q5ZBA9|Q5ZBA9_ORYSJ Os01g0603000 protein OS=Oryza sativa subsp. japonica OX=39947 GN=Os01g0603000 PE=4 SV=1	1	9.39e-08	80.492	1	S	HLIAAAEKKAAAAAASPKPAAQAKLPTKPPP	X;X;X;X;X;X;X;X;X;X;X;X;X;X;X;Phospho (STY);X;X;X;X;X;X;X;X;X;X;X;X;X;X;X	XXXXXXXXPPPPPPPPPPPPPPPPXXXXXXX	KAAAAAAS(1)PK	8	3	-0.34157			0;1;2;3;4;5;6;7;8905;8906;8907;8908	8908	3.05291	3.02269	2.99659	3.73347	3.6539	3.72554	2.26674e-05	-0.680241	0.624061
Q5ZDX7	Os01g0614700	tr|Q5ZDX7|Q5ZDX7_ORYSJ	221	tr|Q5ZDX7|Q5ZDX7_ORYSJ	tr|Q5ZDX7|Q5ZDX7_ORYSJ	>tr|Q5ZDX7|Q5ZDX7_ORYSJ Os01g0614700 protein OS=Oryza sativa subsp. japonica OX=39947 GN=Os01g0614700 PE=2 SV=1	0.999989	1.01e-21	106.01	2	S	SKEAPVSLKLPPPPPSPVSPTDSGIAASPFK	X;X;X;X;X;X;X;X;X;X;X;X;X;X;X;Phospho (STY);X;X;Phospho (STY);X;X;X;X;X;X;X;X;X;X;X;X	XXXXXXXXXPPPPPPPPPPPPPPPPPPPPPP	LPPPPPS(1)PVS(0.998)PT(0.002)DSGIAASPFK	7	3	0.4824			10731;10732;10733;10734;10735;10736;10737;10738;10739;10740;10741;10742;10743;10744;10745;10746;10747	10741	1.32884	1.34519	1.33876	2.02313	2.01878	2.08839	6.72976e-06	-0.705836	0.613087
Q65XH1	Os05g0378900	tr|Q65XH1|Q65XH1_ORYSJ	12	tr|Q65XH1|Q65XH1_ORYSJ	tr|Q65XH1|Q65XH1_ORYSJ	>tr|Q65XH1|Q65XH1_ORYSJ Conserved oligomeric Golgi complex subunit 5 OS=Oryza sativa subsp. japonica OX=39947 GN=Os05g0378900 PE=2 SV=1	0.8534	0.00859391	26.373	1	S	____MAAPATPRLLLSPTSKDLIAAASSSFP	X;X;X;X;X;X;X;X;X;X;X;X;X;X;X;Phospho (STY);X;X;X;X;X;X;X;X;X;X;X;X;X;X;X	XXXXXXXXXXXXPPPPPPPPXXXXXXXXXXX	LLLS(0.853)PT(0.143)S(0.004)K	4	2	0.13262			10483;10484;10485	10483	-0.13541	-0.151752	-0.153403	0.397163	0.513555	0.495157	7.31091e-05	-0.61548	0.652713
Q688U6	Os05g0579000	tr|Q688U6|Q688U6_ORYSJ	18	tr|Q688U6|Q688U6_ORYSJ	tr|Q688U6|Q688U6_ORYSJ	>tr|Q688U6|Q688U6_ORYSJ Os05g0579000 protein OS=Oryza sativa subsp. japonica OX=39947 GN=Os05g0579000 PE=3 SV=1	0.772206	0.00225942	51.156	1	S	FRGEESGGEDGGRTASASDLRKPFLHTGSWY	X;X;X;X;X;X;X;X;X;X;X;X;X;X;X;Phospho (STY);X;X;X;X;X;X;X;X;X;X;X;X;X;X;X	XXXXXXXXXXXXXPPPPPPPPXXXXXXXXXX	T(0.027)AS(0.772)AS(0.201)DLR	3	2	0.26655			16540;16541	16541	-0.595582	-0.681417	-0.498984	0.085496	-0.00222859	-0.0128672	0.000550606	-0.615461	0.652721
Q69IN8	Os09g0513000	tr|Q69IN8|Q69IN8_ORYSJ	16	tr|Q69IN8|Q69IN8_ORYSJ	tr|Q69IN8|Q69IN8_ORYSJ	>tr|Q69IN8|Q69IN8_ORYSJ Os09g0513000 protein OS=Oryza sativa subsp. japonica OX=39947 GN=Os09g0513000 PE=4 SV=1	0.98847	2.13e-05	77.692	1	S	MEDQKKNAKPEGSSGSQRGAPPAPDAGLPNP	X;X;X;X;X;X;X;X;X;X;X;X;X;X;X;Phospho (STY);X;X;X;X;X;X;X;X;X;X;X;X;X;X;X	XXXXXXPPPPPPPPPPPPXXXXXXXXXXXXX	NAKPEGS(0.001)S(0.01)GS(0.988)QR	10	3	-0.39388			11934;11935;11936;11937;11938;11939	11938	-0.472601	-0.303477	-0.350737	0.544792	0.311776	0.538574	0.000787088	-0.840652	0.558391
Q6ES98	Os09g0346700	tr|Q6ES98|Q6ES98_ORYSJ	126	tr|Q6ES98|Q6ES98_ORYSJ	tr|Q6ES98|Q6ES98_ORYSJ	>tr|Q6ES98|Q6ES98_ORYSJ Os09g0346700 protein OS=Oryza sativa subsp. japonica OX=39947 GN=Os09g0346700 PE=2 SV=1	0.809186	4.41e-05	49.986	1	S	AASKMKKALGLRSSASSKGGSPGSGGGGKSV	X;X;X;X;X;X;X;X;X;X;X;X;X;X;X;Phospho (STY);X;X;X;X;Phospho (STY);X;X;X;X;X;X;X;X;X;X	XXXXXXXXXXXXPPPPPPPPPPPPPPPPPXX	S(0.024)S(0.082)AS(0.809)S(0.081)KGGS(0.004)PGSGGGGK	4	3	-0.94987			15663;15664;15665	15663	-0.808668	-0.780821	-0.909502	0.199554	0.251768	0.192081	1.74232e-05	-1.04746	0.483818
Q6K1X9	Os02g0608500	tr|Q6K1X9|Q6K1X9_ORYSJ	27	tr|Q6K1X9|Q6K1X9_ORYSJ	tr|Q6K1X9|Q6K1X9_ORYSJ	>tr|Q6K1X9|Q6K1X9_ORYSJ Os02g0608500 protein OS=Oryza sativa subsp. japonica OX=39947 GN=Os02g0608500 PE=2 SV=1	0.988666	7.29e-05	85.637	1	S	SRQLSSGAARVWRQLSLEPVYTPRRAGAVGG	X;X;X;X;Phospho (STY);Phospho (STY);X;X;X;X;X;X;X;X;X;Phospho (STY);X;X;X;X;X;X;X;X;X;X;X;X;X;X;X	XXXXXXXXXXXXXPPPPPPPPPPPXXXXXXX	QLS(0.989)LEPVY(0.007)T(0.005)PR	3	2	1.8631			13007;13008;13009	13009	0.66774	0.75521	0.820368	1.50004	1.50771	1.49633	7.03045e-05	-0.753585	0.593128
Q6K647	Os02g0505400	tr|Q6K647|Q6K647_ORYSJ	50	tr|Q6K647|Q6K647_ORYSJ	tr|Q6K647|Q6K647_ORYSJ	>tr|Q6K647|Q6K647_ORYSJ Exocyst subunit Exo70 family protein OS=Oryza sativa subsp. japonica OX=39947 GN=Os02g0505400 PE=2 SV=1	1	0.00763214	33.154	1	S	LATSKNAADDMIRILSGFDNRLSQITSDLFP	X;X;X;X;X;X;X;X;X;X;X;X;X;X;X;Phospho (STY);X;X;X;X;X;X;X;X;X;X;X;X;X;X;X	XXXXXXXXXXXXXPPPPPPPPXXXXXXXXXX	ILS(1)GFDNR	3	2	-0.89116			8475;8476;8477	8477	-0.42517	-0.394085	-0.325863	0.334058	0.284785	0.215946	0.000126785	-0.659969	0.632892
Q6L561	Os05g0589600	tr|Q6L561|Q6L561_ORYSJ	35	tr|Q6L561|Q6L561_ORYSJ	tr|Q6L561|Q6L561_ORYSJ	>tr|Q6L561|Q6L561_ORYSJ Os05g0589600 protein OS=Oryza sativa subsp. japonica OX=39947 GN=Os05g0589600 PE=4 SV=1	1	0.00102896	80.492	1	S	HLIAAAEKKAAAAAASPKLASSPAPAPAKLP	X;X;X;X;X;X;X;X;X;X;X;X;X;X;X;Phospho (STY);X;X;X;X;Phospho (STY);Phospho (STY);X;X;X;X;X;X;X;X;X	XXXXXXXXPPPPPPPPPPXXXXXXXXXXXXX	KAAAAAAS(1)PK	8	3	-0.34157			0;1;2;3;4;5;8905;8906;8907;8908	8908	2.6765	2.63344	2.64129	3.3179	3.22704	3.29714	3.24331e-05	-0.630286	0.646049
Q6YS19	Os08g0282000	tr|Q6YS19|Q6YS19_ORYSJ	237	tr|Q6YS19|Q6YS19_ORYSJ	tr|Q6YS19|Q6YS19_ORYSJ	>tr|Q6YS19|Q6YS19_ORYSJ Os08g0282000 protein OS=Oryza sativa subsp. japonica OX=39947 GN=Os08g0282000 PE=2 SV=1	1	3.75e-05	124.09	1	S	VPATGVPVATLEQRASRNDAWSQRMREKYGL	X;X;X;X;X;X;X;X;X;X;X;X;X;X;X;Phospho (STY);X;X;X;X;X;X;X;X;X;X;X;X;X;X;X	XXXXXXXXXXXXXXPPPPPPPPPPXXXXXXX	AS(1)RNDAWSQR	2	2	-0.38739			1846;1847;1848;1849;1850;1851	1848	0.776682	0.639425	0.612288	1.3171	1.53138	1.24286	0.00237427	-0.68765	0.620864
Q6YUH7	tom1	tr|Q6YUH7|Q6YUH7_ORYSJ	35	tr|Q6YUH7|Q6YUH7_ORYSJ	tr|Q6YUH7|Q6YUH7_ORYSJ	>tr|Q6YUH7|Q6YUH7_ORYSJ Os02g0697300 protein OS=Oryza sativa subsp. japonica OX=39947 GN=tom1 PE=2 SV=1	0.996198	2.39e-05	82.425	1	S	GSEVSKKMTAGMSSMSFKMKEIFQGQTPADK	X;X;X;X;X;X;X;X;X;X;X;Oxidation (M);X;X;X;Phospho (STY);X;X;X;X;X;X;X;X;X;X;X;X;X;X;X	XXXXXXXPPPPPPPPPPPXXXXXXXXXXXXX	MTAGMSS(0.003)MS(0.996)FK	9	2	-1.2567			11815;11816;11817;11818;11819;11820;11821	11817	1.84636	1.99445	1.8851	2.65525	2.59224	2.59493	0.000133934	-0.705506	0.613227
Q6Z8S0	Os08g0442350	tr|Q6Z8S0|Q6Z8S0_ORYSJ	165	tr|Q6Z8S0|Q6Z8S0_ORYSJ	tr|Q6Z8S0|Q6Z8S0_ORYSJ	>tr|Q6Z8S0|Q6Z8S0_ORYSJ Os08g0442350 protein OS=Oryza sativa subsp. japonica OX=39947 GN=Os08g0442350 PE=2 SV=1	0.978725	0.0249536	12.024	2	S	MKKLFAEKDTDRNVESTKSRLGGFVCNLSED	X;X;X;X;X;X;X;X;X;X;X;X;X;X;X;Phospho (STY);Phospho (STY);X;X;X;X;X;X;X;X;X;X;X;X;X;X	XXXXXXXXXXXXPPPPPPPPXXXXXXXXXXX	NVES(0.979)T(0.983)KS(0.038)R	4	2	1.6997			12553	12553	-1.66981	-1.68416	-1.7289	-1.00821	-1.05472	-0.989821	1.34726e-05	-0.676708	0.625591
Q6Z9W8	Os08g0407600	tr|Q6Z9W8|Q6Z9W8_ORYSJ	19	tr|Q6Z9W8|Q6Z9W8_ORYSJ	tr|Q6Z9W8|Q6Z9W8_ORYSJ	>tr|Q6Z9W8|Q6Z9W8_ORYSJ Os08g0407600 protein OS=Oryza sativa subsp. japonica OX=39947 GN=Os08g0407600 PE=2 SV=1	0.846119	7.89e-19	183.84	1	S	MGKRGGRKNPMRRTTSMTEFAPPVDVLVGGR	X;X;X;X;X;X;X;X;X;X;X;X;X;X;X;Phospho (STY);Oxidation (M);X;X;X;X;X;X;X;X;X;X;X;X;X;X	XXXXXXXXXXXXXPPPPPPPPPPPPPPPPPP	T(0.011)T(0.016)S(0.846)MT(0.128)EFAPPVDVLVGGR	3	2	-0.62143			17511;17513;17515;17516;17517;17518;17519;17520;17521;17522;17523;17524;17525	17525	0.83128	0.973037	0.857381	1.71851	1.73295	1.75877	4.68711e-05	-0.849512	0.554973
Q75LI9	LOC_Os03g61890	tr|Q75LI9|Q75LI9_ORYSJ	811	tr|Q75LI9|Q75LI9_ORYSJ	tr|Q75LI9|Q75LI9_ORYSJ	>tr|Q75LI9|Q75LI9_ORYSJ AIG1 family protein, expressed OS=Oryza sativa subsp. japonica OX=39947 GN=LOC_Os03g61890 PE=4 SV=1	1	4.74e-05	107.94	1	S	TNSLSARVASPANLFSLRFRMPPLPHFLSSL	X;X;X;X;X;X;X;X;X;X;X;X;X;X;X;Phospho (STY);X;X;X;X;X;X;X;X;X;X;X;X;X;X;X	XXXXXXXPPPPPPPPPPPXXXXXXXXXXXXX	VASPANLFS(1)LR	9	2	-0.73533			17938;17939;17940;17941;17942	17940	-0.870022	-0.855915	-0.952308	-0.149022	-0.0537994	-0.242693	0.000280712	-0.744244	0.596981
Q75LR5	LOC_Os03g27260	tr|Q75LR5|Q75LR5_ORYSJ;tr|Q8LH97|Q8LH97_ORYSJ	231;231	tr|Q75LR5|Q75LR5_ORYSJ;tr|Q8LH97|Q8LH97_ORYSJ	tr|Q8LH97|Q8LH97_ORYSJ	>tr|Q75LR5|Q75LR5_ORYSJ 40S ribosomal protein S6 OS=Oryza sativa subsp. japonica OX=39947 GN=LOC_Os03g27260 PE=2 SV=1;>tr|Q8LH97|Q8LH97_ORYSJ 40S ribosomal protein S6 OS=Oryza sativa subsp. japonica OX=39947 GN=Os07g0622100 PE=2 SV=1	1	0.0029236	37.715	1;2	S	LLAQRLKEQRERRSESLAKRRSKLSAATTA_;LLAQRLKEQRERRSESLAKRRSKLSSAAKAA	X;X;X;X;X;X;X;X;X;X;X;X;X;Phospho (STY);X;Phospho (STY);X;X;X;X;X;Phospho (STY);X;X;Phospho (STY);Phospho (STY);X;Phospho (STY);X;X;X	XXXXXXXXXXPPPPPPPPPXXXXXXXXXXXX	ERRS(1)ES(1)LAK	6	3	-0.70029			4825;13800;13801;13802;13803;13804;13805;13806;13807;13808;13809	4825	2.96464	2.96232	2.81818	4.4219	4.32352	4.3717	1.30924e-05	-1.45732	0.364168
Q7XI42	Os07g0623600	tr|Q7XI42|Q7XI42_ORYSJ	161	tr|Q7XI42|Q7XI42_ORYSJ	tr|Q7XI42|Q7XI42_ORYSJ	>tr|Q7XI42|Q7XI42_ORYSJ Os07g0623600 protein OS=Oryza sativa subsp. japonica OX=39947 GN=Os07g0623600 PE=2 SV=1	1	0.0142609	50.185	1	S	GTLQSEDESKMKRQISNAKSKELSGHDIFAP	X;X;X;X;X;X;X;X;X;X;X;X;X;X;X;Phospho (STY);X;X;X;X;X;X;X;X;X;X;X;X;X;X;X	XXXXXXXXXXXXPPPPPPPXXXXXXXXXXXX	RQIS(1)NAK	4	2	-0.83727			13729;13730;13731	13731	0.501255	0.14733	0.0312019	0.911198	0.842567	0.935175	0.00966959	-0.669718	0.62863
Q7XXS2	LOC_Os03g23010	tr|Q7XXS2|Q7XXS2_ORYSJ	120	tr|Q7XXS2|Q7XXS2_ORYSJ	tr|Q7XXS2|Q7XXS2_ORYSJ	>tr|Q7XXS2|Q7XXS2_ORYSJ 17.7 kDa low temperature induced protein OS=Oryza sativa subsp. japonica OX=39947 GN=LOC_Os03g23010 PE=2 SV=1	0.999978	0.00174091	73.176	1	S	AALKTDAVLKALSLVSPKGGDAPRGLREKPR	X;X;X;X;X;X;X;X;X;X;X;X;X;X;X;Phospho (STY);X;X;X;X;X;X;X;X;X;X;X;X;X;X;X	XXXXXXXXXXPPPPPPPPXXXXXXXXXXXXX	ALSLVS(1)PK	6	3	-0.016091			1226;1228;1229;1230;1231	1229	1.59571	1.5945	1.55757	2.34517	2.33344	2.31323	1.13492e-06	-0.74802	0.59542
Q8H069	LOC_Os03g10880	tr|Q8H069|Q8H069_ORYSJ	381	tr|Q8H069|Q8H069_ORYSJ	tr|Q8H069|Q8H069_ORYSJ	>tr|Q8H069|Q8H069_ORYSJ Os03g0206700 protein OS=Oryza sativa subsp. japonica OX=39947 GN=LOC_Os03g10880 PE=3 SV=1	0.99973	3.7e-36	159.16	1	S	PRLDYTTDDDFSSAASPPHSDVAQVGRLMDS	X;X;X;X;X;X;X;X;X;X;X;X;X;X;X;Phospho (STY);X;X;X;X;X;X;X;X;X;X;X;X;X;X;X	XXPPPPPPPPPPPPPPPPPPPPPPPPPXXXX	LDYTTDDDFSSAAS(1)PPHSDVAQVGR	14	3	-0.2391			9944;9945	9944	-1.95647	-1.99783	-1.98128	-1.02526	-1.01608	-0.944571	4.03427e-06	-0.983225	0.505848
Q8H5M0	Os07g0585000	tr|Q8H5M0|Q8H5M0_ORYSJ	434	tr|Q8H5M0|Q8H5M0_ORYSJ	tr|Q8H5M0|Q8H5M0_ORYSJ	>tr|Q8H5M0|Q8H5M0_ORYSJ Os07g0585000 protein OS=Oryza sativa subsp. japonica OX=39947 GN=Os07g0585000 PE=2 SV=1	1	0.000496265	47.669	1	S	AAAAAKKPMAGGPEKSPKVFYGSRAFF____	X;X;X;X;X;X;X;X;X;X;X;X;X;X;X;Phospho (STY);X;X;X;X;X;X;X;X;X;X;X;X;X;X;X	XXXXXXPPPPPPPPPPPPXXXXXXXXXXXXX	KPMAGGPEKS(1)PK	10	4	-0.70587			9325;9326	9326	0.595848	0.632438	0.637802	1.48455	1.33806	1.44612	6.27386e-05	-0.800882	0.573998
Q8LH97	Os07g0622100	tr|Q8LH97|Q8LH97_ORYSJ	237	tr|Q8LH97|Q8LH97_ORYSJ	tr|Q8LH97|Q8LH97_ORYSJ	>tr|Q8LH97|Q8LH97_ORYSJ 40S ribosomal protein S6 OS=Oryza sativa subsp. japonica OX=39947 GN=Os07g0622100 PE=2 SV=1	0.999983	0.00195961	55.133	1;2	S	KEQRERRSESLAKRRSKLSSAAKAAATTA__	X;X;X;X;X;X;X;Phospho (STY);X;Phospho (STY);X;X;X;X;X;Phospho (STY);X;X;Phospho (STY);X;X;X;X;X;X;X;X;X;X;X;X	XXXXXXXXXXXXXXXPPPPPPPPXXXXXXXX	S(1)KLS(0.951)S(0.049)AAK	1	3	-0.24584			15008;15014;15015;15016;15017;15018;15019;15020	15017	2.238	2.03181	1.9124	3.50612	3.79373	3.43589	0.000470804	-1.51784	0.349208
Q8LH97	Os07g0622100	tr|Q8LH97|Q8LH97_ORYSJ	240	tr|Q8LH97|Q8LH97_ORYSJ	tr|Q8LH97|Q8LH97_ORYSJ	>tr|Q8LH97|Q8LH97_ORYSJ 40S ribosomal protein S6 OS=Oryza sativa subsp. japonica OX=39947 GN=Os07g0622100 PE=2 SV=1	0.951491	0.00195961	47.135	1;2	S	RERRSESLAKRRSKLSSAAKAAATTA_____	X;X;X;X;Phospho (STY);X;Phospho (STY);X;X;X;X;X;Phospho (STY);X;X;Phospho (STY);X;X;X;X;X;X;X;X;X;X;X;X;X;X;X	XXXXXXXXXXXXPPPPPPPPXXXXXXXXXXX	S(1)KLS(0.951)S(0.049)AAK	4	3	-0.24584			15006;15009;15010;15011;15012;15013;15015;15016;15017;15018;15019;15020	15017	2.8962	2.77466	2.67157	4.35496	4.47263	4.27754	5.11438e-05	-1.58756	0.332733
Q9AUQ4	LOC_Os03g50480	tr|Q9AUQ4|Q9AUQ4_ORYSJ	124	tr|Q9AUQ4|Q9AUQ4_ORYSJ	tr|Q9AUQ4|Q9AUQ4_ORYSJ	>tr|Q9AUQ4|Q9AUQ4_ORYSJ Phosphoglucomutase (alpha-D-glucose-1,6-bisphosphate-dependent) OS=Oryza sativa subsp. japonica OX=39947 GN=LOC_Os03g50480 PE=2 SV=1	0.997887	1.71e-33	127.9	1	S	GADGSKATGAFILTASHNPGGPTEDFGIKYN	X;X;X;X;X;X;X;X;X;X;X;X;X;X;X;Phospho (STY);X;X;X;X;X;X;X;X;X;X;X;X;X;X;X	XXXXXXPPPPPPPPPPPPPPPPPPPPPPPXX	ATGAFILT(0.002)AS(0.998)HNPGGPTEDFGIK	10	3	-0.33794			1979;1980;1981;1982;1984;1985;1986;1987;1988;1989;1990;1991;1992;1994;1995	1985	2.58508	2.61666	2.6032	3.19962	3.21202	3.22935	1.065e-06	-0.612013	0.654283
B2ZX90	FSM	sp|B2ZX90|FAS1_ORYSJ	282	sp|B2ZX90|FAS1_ORYSJ	sp|B2ZX90|FAS1_ORYSJ	>sp|B2ZX90|FAS1_ORYSJ Chromatin assembly factor 1 subunit FSM OS=Oryza sativa subsp. japonica OX=39947 GN=FSM PE=2 SV=1	0.999812	0.00290293	57.916	1	T	KALNLEGIKSLVERATQKSNIERGAKNTGST	X;X;X;X;X;X;X;X;X;X;X;X;X;X;X;Phospho (STY);X;X;X;X;X;X;X;X;X;X;X;X;X;X;X	XXXXXXXXXXXXXXPPPPPPPPPXXXXXXXX	AT(1)QKSNIER	2	2	0.099443			2064;2065;2066;2067	2067	0.0139362	0.00600722	0.0426676	1.04389	0.895229	0.977057	2.80954e-05	-0.95119	0.517206
Q0PVB3	RR7	sp|Q0PVB3|ORR7_ORYSJ	118	sp|Q0PVB3|ORR7_ORYSJ	sp|Q0PVB3|ORR7_ORYSJ	>sp|Q0PVB3|ORR7_ORYSJ Two-component response regulator ORR7 OS=Oryza sativa subsp. japonica OX=39947 GN=RR7 PE=2 SV=1	0.908315	0.0483725	15.7	1	T	RAVITALLRRSKYRVTAVDSGKRALEILGSE	X;X;X;X;X;X;X;X;X;X;X;X;X;X;X;Phospho (STY);X;X;X;X;X;X;X;X;X;X;X;X;X;X;X	XXXXXXXXXXXXPPPPPPPPPPXXXXXXXXX	Y(0.054)RVT(0.908)AVDS(0.038)GK	4	2	3.5855			20061	20061	-2.73055	-2.73371	-2.61975	-1.88162	-1.9919	-2.17263	0.00184822	-0.679286	0.624474
Q10HD0	RCABP89	sp|Q10HD0|CB23_ORYSJ	34	sp|Q10HD0|CB23_ORYSJ	sp|Q10HD0|CB23_ORYSJ	>sp|Q10HD0|CB23_ORYSJ Chlorophyll a-b binding protein, chloroplastic OS=Oryza sativa subsp. japonica OX=39947 GN=RCABP89 PE=2 SV=1	0.982374	0.0121801	26.076	1	T	RDELVRRVGDSGGRITMRRTVKSAPQSIWYG	X;X;X;X;X;X;X;X;X;X;X;X;X;X;X;Phospho (STY);X;X;X;Phospho (STY);X;X;Phospho (STY);X;X;X;X;X;X;X;X	XXXXXXXPPPPPPPPPPPXXXXXXXXXXXXX	VGDS(0.018)GGRIT(0.982)MR	9	3	-0.17623			18295;18296	18296	0.815217	0.499532	0.622872	1.20777	1.52056	1.01074	0.0262915	-0.600481	0.659534
Q7G6K7	FH3	sp|Q7G6K7|FH3_ORYSJ	815	sp|Q7G6K7|FH3_ORYSJ	sp|Q7G6K7|FH3_ORYSJ	>sp|Q7G6K7|FH3_ORYSJ Formin-like protein 3 OS=Oryza sativa subsp. japonica OX=39947 GN=FH3 PE=2 SV=2	0.999747	0.00530838	9.9452	1	T	NAPAPPPLLGRGREATGSAKGRGIGLAQQSN	X;X;X;X;X;X;X;X;X;X;X;X;X;X;X;Phospho (STY);X;X;X;X;X;X;X;X;X;X;X;X;X;X;X	XXXXXXXXXXXXXPPPPPPPXXXXXXXXXXX	EAT(1)GSAK	3	3	-0.57038			3741;3742;3743;3744;3745;3746	3746	2.74723	2.73557	2.66506	3.35227	3.28781	3.30228	4.97515e-05	-0.598165	0.660593
A0A0N7KNW9	Os07g0632800	tr|A0A0N7KNW9|A0A0N7KNW9_ORYSJ	283	tr|A0A0N7KNW9|A0A0N7KNW9_ORYSJ	tr|A0A0N7KNW9|A0A0N7KNW9_ORYSJ	>tr|A0A0N7KNW9|A0A0N7KNW9_ORYSJ Os07g0632800 protein (Fragment) OS=Oryza sativa subsp. japonica OX=39947 GN=Os07g0632800 PE=3 SV=1	0.999915	7.8e-19	142.54	1	T	SKIIKAQHANDVYKMTGETGSYRYMAPEVFK	X;X;X;X;X;X;X;X;X;X;X;X;X;X;X;Phospho (STY);X;X;X;X;X;X;X;X;X;X;X;X;X;X;X	XXXXXPPPPPPPPPPPPPPPPPPXXXXXXXX	AQHANDVYKMT(1)GETGSYR	11	3	0.55132			1600;1601;1602;1603;1604;11824;11825	1602	1.01481	1.12852	1.07203	1.68546	1.73897	1.63767	0.000151066	-0.615578	0.652669
A0A0P0V8W3	Os01g0777000	tr|A0A0P0V8W3|A0A0P0V8W3_ORYSJ	645	tr|A0A0P0V8W3|A0A0P0V8W3_ORYSJ	tr|A0A0P0V8W3|A0A0P0V8W3_ORYSJ	>tr|A0A0P0V8W3|A0A0P0V8W3_ORYSJ Conserved oligomeric Golgi complex subunit 1 OS=Oryza sativa subsp. japonica OX=39947 GN=Os01g0777000 PE=3 SV=1	0.99892	0.000141793	65.507	1	T	SPRHSRASFDTAMPFTPRRHTQSSPRSPGRQ	X;X;X;X;X;X;X;X;X;X;X;X;X;X;X;Phospho (STY);X;X;X;X;X;X;X;X;X;X;X;X;X;X;X	XXXXXXPPPPPPPPPPPPXXXXXXXXXXXXX	ASFDT(0.001)AMPFT(0.999)PR	10	2	3.1879			1725;1726	1726	-1.47309	-1.68842	-1.78487	-0.954742	-1.01229	-1.02217	0.00231136	-0.652392	0.636225
A0A0P0WKD6	Os05g0291700	tr|A0A0P0WKD6|A0A0P0WKD6_ORYSJ	440	tr|A0A0P0WKD6|A0A0P0WKD6_ORYSJ	tr|A0A0P0WKD6|A0A0P0WKD6_ORYSJ	>tr|A0A0P0WKD6|A0A0P0WKD6_ORYSJ Os05g0291700 protein OS=Oryza sativa subsp. japonica OX=39947 GN=Os05g0291700 PE=4 SV=1	1	1.91e-05	26.971	1	T	ATQDSDEVEPKAQIATVRGQAKAKKLAPQRA	X;Phospho (STY);X;X;X;X;X;X;X;X;X;X;X;X;X;Phospho (STY);X;X;X;X;X;X;X;X;X;X;X;X;X;X;X	XXXXXXXXXXXPPPPPPPPPPPXXXXXXXXX	AQIAT(1)VRGQAK	5	2	-0.13573			1608;1609;1610;1611;1612;1613;1614;1615;1616;1617;1618;1619;1620;1621;1622;1623;1624;1625;1626;1627;1628	1628	2.83695	2.85689	2.81913	3.68077	3.60906	3.64301	4.23066e-06	-0.806621	0.571719
A0A0P0WKD6	Os05g0291700	tr|A0A0P0WKD6|A0A0P0WKD6_ORYSJ;tr|Q0DJF9|Q0DJF9_ORYSJ	376;376	tr|A0A0P0WKD6|A0A0P0WKD6_ORYSJ	tr|A0A0P0WKD6|A0A0P0WKD6_ORYSJ	>tr|A0A0P0WKD6|A0A0P0WKD6_ORYSJ Os05g0291700 protein OS=Oryza sativa subsp. japonica OX=39947 GN=Os05g0291700 PE=4 SV=1;>tr|Q0DJF9|Q0DJF9_ORYSJ Os05g0291700 protein OS=Oryza sativa subsp. japonica OX=39947 GN=Os05g0291700 PE=4 SV=1	0.978347	0.000123806	89.153	1	T	TRASQRTRQAEEDTTTVKAGGKKTPSDEAAA	Phospho (STY);X;X;Phospho (STY);X;X;X;X;X;X;X;X;X;X;X;Phospho (STY);X;X;X;X;X;X;X;X;X;X;X;X;X;X;X	XXXXXXXXPPPPPPPPPPXXXXXXXXXXXXX	QAEEDT(0.001)T(0.021)T(0.978)VK	8	2	0.15478			12785;12786;12790;12791;12794	12790	1.2823	1.28903	1.21758	2.03515	1.9684	2.01667	1.6227e-05	-0.74377	0.597177
A0A0P0X4N7	Os07g0243150	tr|A0A0P0X4N7|A0A0P0X4N7_ORYSJ	74	tr|A0A0P0X4N7|A0A0P0X4N7_ORYSJ	tr|A0A0P0X4N7|A0A0P0X4N7_ORYSJ	>tr|A0A0P0X4N7|A0A0P0X4N7_ORYSJ Os07g0243150 protein (Fragment) OS=Oryza sativa subsp. japonica OX=39947 GN=Os07g0243150 PE=4 SV=1	0.991758	0.000961635	53.451	1	T	LNKVEEKAPAAASRATKASGAPAKKAAGDGD	X;X;X;X;X;X;X;X;X;X;X;X;X;X;X;Phospho (STY);X;X;X;X;X;X;X;X;X;X;X;X;X;X;X	XXXXXXXXXXXXXXPPPPPPPPPPXXXXXXX	AT(0.992)KAS(0.008)GAPAK	2	3	0.093655			2024;2025;2026	2025	0.856764	0.93531	0.835322	2.42907	2.31949	2.32874	5.71723e-06	-1.4833	0.35767
B9GBE2	Os11g0105750	tr|B9GBE2|B9GBE2_ORYSJ	348	tr|B9GBE2|B9GBE2_ORYSJ	tr|B9GBE2|B9GBE2_ORYSJ	>tr|B9GBE2|B9GBE2_ORYSJ Os11g0105750 protein OS=Oryza sativa subsp. japonica OX=39947 GN=Os11g0105750 PE=4 SV=1	0.999956	0.00285467	47.71	2	T	YQAPSEKISARYLNKTLSPKSRERAKLLMLE	X;X;X;X;X;X;X;X;X;X;X;Phospho (STY);X;X;X;Phospho (STY);X;Phospho (STY);X;X;X;X;X;X;X;X;X;X;Oxidation (M);X;X	XXXXXXXXXXXPPPPPPPPPXXXXXXXXXXX	YLNKT(1)LS(1)PK	5	4	-0.042638			19927;19928;19929;19930	19929	1.22488	1.34193	1.25033	1.94937	1.92049	1.96812	6.04159e-05	-0.673613	0.626935
Q0IZR7	Os09g0553900	tr|Q0IZR7|Q0IZR7_ORYSJ	326	tr|Q0IZR7|Q0IZR7_ORYSJ	tr|Q0IZR7|Q0IZR7_ORYSJ	>tr|Q0IZR7|Q0IZR7_ORYSJ Os09g0553900 protein OS=Oryza sativa subsp. japonica OX=39947 GN=Os09g0553900 PE=2 SV=1	0.88109	2.04e-07	84.433	1;2;3	T	SSLFARKQSKLSFSITSPKVSRSEPKLTPTK	X;Phospho (STY);X;X;X;X;X;X;Phospho (STY);X;X;Phospho (STY);X;Phospho (STY);X;Phospho (STY);Phospho (STY);X;X;X;X;X;Phospho (STY);X;X;X;X;Phospho (STY);X;Phospho (STY);X	XXXXXXPPPPPPPPPPPPPXXXXXXXXXXXX	KQS(0.993)KLS(0.988)FS(0.026)IT(0.881)S(0.112)PK	10	3	0.30915			9390;9396;9397;9398;9399;9400;9401;9404;9408;9410;10902;10903;10907;10908;10910;10911;13170	9410	2.69804	2.63578	2.59315	3.61541	3.57102	3.5945	8.66641e-06	-0.951319	0.517159
Q6Z3Y9	Os07g0694000	tr|Q6Z3Y9|Q6Z3Y9_ORYSJ	273	tr|Q6Z3Y9|Q6Z3Y9_ORYSJ	tr|Q6Z3Y9|Q6Z3Y9_ORYSJ	>tr|Q6Z3Y9|Q6Z3Y9_ORYSJ Phosphoinositide phospholipase C OS=Oryza sativa subsp. japonica OX=39947 GN=Os07g0694000 PE=2 SV=1	1	1.58e-07	99.37	1	T	KPPREYLQAKDGNAATIKEDAKAAATDDAAW	X;X;X;X;X;X;X;X;X;X;X;X;X;X;X;Phospho (STY);X;X;X;X;X;X;X;X;X;X;X;X;X;X;X	XXXXXXXXXXPPPPPPPPPPPPXXXXXXXXX	DGNAAT(1)IKEDAK	6	2	0.59191			2848;2849;2850;2851;2852;2853	2853	1.42222	1.53706	1.48943	2.45874	2.39532	2.43187	1.55458e-05	-0.945741	0.519163
Q6Z411	RCABP69	tr|Q6Z411|Q6Z411_ORYSJ	111	tr|Q6Z411|Q6Z411_ORYSJ	tr|Q6Z411|Q6Z411_ORYSJ	>tr|Q6Z411|Q6Z411_ORYSJ Chlorophyll a-b binding protein, chloroplastic OS=Oryza sativa subsp. japonica OX=39947 GN=RCABP69 PE=2 SV=1	1	3.39e-22	204.96	1	T	LDQNLAKNNAGEIIGTRFETGEVKSTPFQPY	X;X;X;X;X;X;X;X;X;X;X;X;X;X;X;Phospho (STY);X;X;X;Phospho (STY);X;X;X;X;Phospho (STY);Phospho (STY);X;X;X;X;X	XXXXXXXPPPPPPPPPPPPPPPPPXXXXXXX	NNAGEIIGT(1)R	9	2	0.26986			12297;12298;12299;12302;12303;12304;12305;12306;12307;12308;12309;12310;12311;12313;12314;12315;12316;12317;12318;12319;12321;12322;12323;12324;12325;12326;12327;12328	12299	3.78885	3.80032	3.66938	5.02142	4.93226	4.98106	1.53821e-05	-1.2254	0.42768
Q6Z8S0	Os08g0442350	tr|Q6Z8S0|Q6Z8S0_ORYSJ	166	tr|Q6Z8S0|Q6Z8S0_ORYSJ	tr|Q6Z8S0|Q6Z8S0_ORYSJ	>tr|Q6Z8S0|Q6Z8S0_ORYSJ Os08g0442350 protein OS=Oryza sativa subsp. japonica OX=39947 GN=Os08g0442350 PE=2 SV=1	0.982809	0.0249536	12.024	2	T	KKLFAEKDTDRNVESTKSRLGGFVCNLSEDE	X;X;X;X;X;X;X;X;X;X;X;X;X;X;Phospho (STY);Phospho (STY);X;X;X;X;X;X;X;X;X;X;X;X;X;X;X	XXXXXXXXXXXPPPPPPPPXXXXXXXXXXXX	NVES(0.979)T(0.983)KS(0.038)R	5	2	1.6997			12553	12553	-1.66981	-1.68416	-1.7289	-1.00821	-1.05472	-0.989821	1.34726e-05	-0.676708	0.625591
Q75LR5	LOC_Os03g27260	tr|Q75LR5|Q75LR5_ORYSJ	243	tr|Q75LR5|Q75LR5_ORYSJ	tr|Q75LR5|Q75LR5_ORYSJ	>tr|Q75LR5|Q75LR5_ORYSJ 40S ribosomal protein S6 OS=Oryza sativa subsp. japonica OX=39947 GN=LOC_Os03g27260 PE=2 SV=1	0.847101	0.00531618	51.006	1	T	RSESLAKRRSKLSAATTA_____________	X;Phospho (STY);X;Phospho (STY);X;X;X;X;X;X;X;X;X;X;X;Phospho (STY);X;X;X;X;X;X;X;X;X;X;X;X;X;X;X	XXXXXXXXXPPPPPPPPPXXXXXXXXXXXXX	SKLS(0.004)AAT(0.847)T(0.148)A	7	2	-0.33282			15002;15003;15005	15002	0.565118	0.626532	0.554489	1.81849	1.69592	1.7446	9.95463e-06	-1.17096	0.444127
A0A0P0W5N0	Os03g0827700	tr|A0A0P0W5N0|A0A0P0W5N0_ORYSJ;sp|Q0DM51|RH3_ORYSJ	403;728	tr|A0A0P0W5N0|A0A0P0W5N0_ORYSJ	tr|A0A0P0W5N0|A0A0P0W5N0_ORYSJ	>tr|A0A0P0W5N0|A0A0P0W5N0_ORYSJ RNA helicase (Fragment) OS=Oryza sativa subsp. japonica OX=39947 GN=Os03g0827700 PE=4 SV=1;>sp|Q0DM51|RH3_ORYSJ DEAD-box ATP-dependent RNA helicase 3, chloroplastic OS=Oryza sativa subsp. japonica OX=39947 GN=Os03g0827700 PE	0.99868	0.00591788	47.963	1	S	SYGSRSSSSFGGRSSSFGSRDSSRSFSGACF	X;X;X;X;X;X;X;X;X;X;X;X;X;X;X;Phospho (STY);X;X;X;X;X;X;X;X;X;X;X;X;X;X;X	XXXXXXXXXXXXXPPPPPPPXXXXXXXXXXX	SS(0.001)S(0.999)FGSR	3	2	-0.021422			15866;15867;15868	15866	1.90082	1.85406	1.92372	0.664967	0.983147	0.721278	0.000386268	1.10307	2.14811
A0A0P0VWW5	Os03g0284100	tr|A0A0P0VWW5|A0A0P0VWW5_ORYSJ;tr|Q10N33|Q10N33_ORYSJ;sp|Q10N34|PRR73_ORYSJ	94;548;548	tr|A0A0P0VWW5|A0A0P0VWW5_ORYSJ	tr|A0A0P0VWW5|A0A0P0VWW5_ORYSJ	>tr|A0A0P0VWW5|A0A0P0VWW5_ORYSJ Os03g0284100 protein OS=Oryza sativa subsp. japonica OX=39947 GN=Os03g0284100 PE=4 SV=1;>tr|Q10N33|Q10N33_ORYSJ Os03g0284100 protein OS=Oryza sativa subsp. japonica OX=39947 GN=LOC_Os03g17570 PE=4 SV=1;>sp|Q10N34|PRR73_ORYSJ	0.981964	0.00630406	33.416	1	S	KNAITKPSSNRGKVISPSAVKATQHTSAFHP	X;X;X;X;X;X;X;X;X;X;X;X;X;X;X;Phospho (STY);X;X;X;X;X;X;X;X;X;X;X;X;X;X;X	XXXXXXXXXXXXXPPPPPPPPXXXXXXXXXX	VIS(0.982)PS(0.018)AVK	3	2	-0.44852			18496;18497;18498	18497	2.39524	2.45286	2.45311	0.834825	0.772287	0.884436	1.8329e-06	1.60322	3.0382
Q10NQ3	VPS9A	sp|Q10NQ3|VPS9A_ORYSJ	304	sp|Q10NQ3|VPS9A_ORYSJ	sp|Q10NQ3|VPS9A_ORYSJ	>sp|Q10NQ3|VPS9A_ORYSJ Vacuolar protein sorting-associated protein 9A OS=Oryza sativa subsp. japonica OX=39947 GN=VPS9A PE=1 SV=1	0.99578	1.09e-07	92.154	1	S	DVREQKSQTLKASRDSDVNLSLKDNFQGPGL	X;X;X;X;X;X;X;X;X;X;X;X;X;X;X;Phospho (STY);X;X;X;X;X;X;X;X;X;X;X;X;X;X;X	XXXXXXXXXXXPPPPPPPPPPPPXXXXXXXX	AS(0.004)RDS(0.996)DVNLSLK	5	2	0.036466			1843;1844;1845	1845	1.08304	0.974952	1.13552	0.439415	0.41456	0.385881	0.000196443	0.65122	1.5705
Q10NY2	TPR3	sp|Q10NY2|TPR3_ORYSJ	639	sp|Q10NY2|TPR3_ORYSJ	sp|Q10NY2|TPR3_ORYSJ	>sp|Q10NY2|TPR3_ORYSJ Protein TPR3 OS=Oryza sativa subsp. japonica OX=39947 GN=TPR3 PE=1 SV=1	0.999837	7.51e-21	94.092	1	S	TSLLTTIDADGGLPASPRVRFNKEGTLLAVS	X;X;X;X;X;X;X;X;X;X;X;X;X;X;X;Phospho (STY);X;X;X;X;X;X;X;X;X;X;X;X;X;X;X	PPPPPPPPPPPPPPPPPPXXXXXXXXXXXXX	IWDMDNTSLLTTIDADGGLPAS(1)PR	22	3	-0.27433			8861;8862;8863	8861	-3.87569	-4.17973	-4.25449	-5.16897	-4.73948	-4.50486	0.0362989	0.701132	1.62578
Q5Z6F0	TIP2-2	sp|Q5Z6F0|TIP22_ORYSJ	245	sp|Q5Z6F0|TIP22_ORYSJ	sp|Q5Z6F0|TIP22_ORYSJ	>sp|Q5Z6F0|TIP22_ORYSJ Probable aquaporin TIP2-2 OS=Oryza sativa subsp. japonica OX=39947 GN=TIP2-2 PE=2 SV=1	0.859822	2.58e-09	78.612	1	S	VYRYVYMCGDHAPVASSEF____________	X;X;X;X;X;X;Oxidation (M);X;X;X;X;X;X;X;X;Phospho (STY);X;X;X;X;X;X;X;X;X;X;X;X;X;X;X	XXXPPPPPPPPPPPPPPPPXXXXXXXXXXXX	YVYMCGDHAPVAS(0.86)S(0.14)EF	13	2	-0.53962			20163;20164;20165;20166;20167;20168;20169;20170;20171	20170	1.30107	1.26185	1.36676	0.664033	0.739826	0.587837	0.000269684	0.645995	1.56482
Q651D5	PIP2-7	sp|Q651D5|PIP27_ORYSJ	282	sp|Q651D5|PIP27_ORYSJ	sp|Q651D5|PIP27_ORYSJ	>sp|Q651D5|PIP27_ORYSJ Probable aquaporin PIP2-7 OS=Oryza sativa subsp. japonica OX=39947 GN=PIP2-7 PE=2 SV=2	0.892322	5.96e-05	68.29	2	S	YHKLVLRGEAAKALSSFRSTSVTA_______	X;X;X;X;X;X;X;X;X;X;X;X;X;X;X;Phospho (STY);X;X;Phospho (STY);Phospho (STY);Phospho (STY);X;X;X;X;X;X;X;X;X;X	XXXXXXXXXXXXPPPPPPPPPPPPXXXXXXX	ALS(0.101)S(0.892)FRS(0.081)T(0.424)S(0.187)VT(0.315)A	4	2	-1.1318			1247;1248;1249;1250;1251;1252	1252	2.30572	2.3893	2.36468	0.540436	0.69435	0.661011	5.32646e-06	1.7213	3.29733
Q69SV0	APX8	sp|Q69SV0|APX8_ORYSJ;tr|A0A0P0VK76|A0A0P0VK76_ORYSJ	434;91	sp|Q69SV0|APX8_ORYSJ	sp|Q69SV0|APX8_ORYSJ	>sp|Q69SV0|APX8_ORYSJ Probable L-ascorbate peroxidase 8, chloroplastic OS=Oryza sativa subsp. japonica OX=39947 GN=APX8 PE=1 SV=2;>tr|A0A0P0VK76|A0A0P0VK76_ORYSJ Os02g0553200 protein (Fragment) OS=Oryza sativa subsp. japonica OX=39947 GN=Os02g0553200 PE=4	0.993711	0.000601202	85.391	1	S	FVAAKYSYGKKELSDSMKQKIRAEYEGFGGS	X;X;X;X;X;X;X;X;X;X;X;X;X;X;X;Phospho (STY);X;X;X;X;X;X;X;X;X;X;X;X;X;X;X	XXXXXXXXXXXPPPPPPPPPXXXXXXXXXXX	ELS(0.006)DS(0.994)MKQK	5	2	1.1541			4479;4480;4481;4482;4483;4484	4484	3.92024	3.87973	3.92506	2.54691	2.49992	2.55127	3.80513e-07	1.37564	2.59484
A0A0P0VS07	Os02g0831100	tr|A0A0P0VS07|A0A0P0VS07_ORYSJ;sp|Q6K977|C3H19_ORYSJ	45;303	tr|A0A0P0VS07|A0A0P0VS07_ORYSJ	tr|A0A0P0VS07|A0A0P0VS07_ORYSJ	>tr|A0A0P0VS07|A0A0P0VS07_ORYSJ Os02g0831100 protein (Fragment) OS=Oryza sativa subsp. japonica OX=39947 GN=Os02g0831100 PE=4 SV=1;>sp|Q6K977|C3H19_ORYSJ Zinc finger CCCH domain-containing protein 19 OS=Oryza sativa subsp. japonica OX=39947 GN=Os02g0831100	0.999073	0.00432791	39.442	1	S	RQTHDSYGFERSHRGSAEKLLSESRFSQREP	X;X;X;X;X;X;X;X;X;X;X;X;X;X;X;Phospho (STY);X;X;X;X;X;X;X;X;X;X;X;X;X;X;X	XXXXXXXXXXXPPPPPPPPXXXXXXXXXXXX	S(0.001)HRGS(0.999)AEK	5	3	-0.49272			14896	14896	-0.18998	-0.265767	-0.116935	-2.12846	-2.27006	-2.11006	7.52612e-06	1.97863	3.9412
Q75GR5	SPIN1	sp|Q75GR5|SPIN1_ORYSJ	16	sp|Q75GR5|SPIN1_ORYSJ	sp|Q75GR5|SPIN1_ORYSJ	>sp|Q75GR5|SPIN1_ORYSJ KH domain-containing protein SPIN1 OS=Oryza sativa subsp. japonica OX=39947 GN=SPIN1 PE=1 SV=1	1	0.0160349	30.705	1	S	MSGLYSPGFSPARNLSPQIRSNPTDVDSQYL	X;X;X;X;X;X;X;X;X;X;X;X;X;X;X;Phospho (STY);X;X;X;X;X;X;X;X;X;X;X;X;X;X;X	XXXXXXXXXXXXXPPPPPPPXXXXXXXXXXX	NLS(1)PQIR	3	2	0.20804			12266	12266	-1.17989	-1.31346	-1.27359	-1.77652	-1.93313	-1.87226	0.000557529	0.604994	1.52097
Q7XII4	REM4.1	sp|Q7XII4|REM41_ORYSJ	173	sp|Q7XII4|REM41_ORYSJ	sp|Q7XII4|REM41_ORYSJ	>sp|Q7XII4|REM41_ORYSJ Remorin 4.1 OS=Oryza sativa subsp. japonica OX=39947 GN=REM4.1 PE=1 SV=1	0.999755	2.41e-36	136.46	1	S	ETNPLAIVPDSNPIPSPRRAHLALPAPGDVS	X;X;X;X;X;X;X;X;X;X;X;X;X;X;X;Phospho (STY);X;X;X;X;X;X;X;X;X;X;X;X;X;X;X	PPPPPPPPPPPPPPPPPPXXXXXXXXXXXXX	IGEDELEETNPLAIVPDSNPIPS(1)PR	23	2	-3.6109			8246;8247;8248;8249;8250;8251;8252;8253;8254;8255;8256;8257;8258;8259;8260	8260	-0.387366	-0.327151	-0.0734583	-0.989003	-0.764155	-0.997638	0.00598264	0.654273	1.57382
A0A0P0W7K8	Os04g0233400	tr|A0A0P0W7K8|A0A0P0W7K8_ORYSJ;sp|Q7XLR1|PIP26_ORYSJ	270;275	tr|A0A0P0W7K8|A0A0P0W7K8_ORYSJ	tr|A0A0P0W7K8|A0A0P0W7K8_ORYSJ	>tr|A0A0P0W7K8|A0A0P0W7K8_ORYSJ Os04g0233400 protein (Fragment) OS=Oryza sativa subsp. japonica OX=39947 GN=Os04g0233400 PE=3 SV=1;>sp|Q7XLR1|PIP26_ORYSJ Probable aquaporin PIP2-6 OS=Oryza sativa subsp. japonica OX=39947 GN=PIP2-6 PE=2 SV=2	0.938818	0.000426832	63.038	2	S	YHQYILRAAAIKALGSFRSNPSN________	X;X;X;X;X;X;X;X;X;X;X;X;X;X;X;Phospho (STY);X;X;Phospho (STY);X;X;X;X;X;X;X;X;X;X;X;X	XXXXXXXXXXXXPPPPPPPPPPPXXXXXXXX	ALGS(0.939)FRS(0.531)NPS(0.531)N	4	2	-0.080283			1132;1134;1138	1134	3.40966	3.4211	3.5113	2.2595	2.26171	2.29989	4.56635e-06	1.17365	2.25582
A0A0P0W7K8	Os04g0233400	tr|A0A0P0W7K8|A0A0P0W7K8_ORYSJ;sp|Q7XLR1|PIP26_ORYSJ	273;278	tr|A0A0P0W7K8|A0A0P0W7K8_ORYSJ	tr|A0A0P0W7K8|A0A0P0W7K8_ORYSJ	>tr|A0A0P0W7K8|A0A0P0W7K8_ORYSJ Os04g0233400 protein (Fragment) OS=Oryza sativa subsp. japonica OX=39947 GN=Os04g0233400 PE=3 SV=1;>sp|Q7XLR1|PIP26_ORYSJ Probable aquaporin PIP2-6 OS=Oryza sativa subsp. japonica OX=39947 GN=PIP2-6 PE=2 SV=2	0.997238	2.84e-05	98.935	1;2	S	YILRAAAIKALGSFRSNPSN___________	X;X;X;X;X;X;X;X;X;X;X;X;Phospho (STY);X;X;Phospho (STY);X;X;Phospho (STY);X;X;X;X;X;X;X;X;X;X;X;X	XXXXXXXXXPPPPPPPPPPPXXXXXXXXXXX	ALGS(0.003)FRS(0.997)NPS(1)N	7	2	-0.3717			1128;1129;1130;1131;1132;1133;1134;1135;1136;1137;1138;1139;1140;1141	1136	4.61908	4.64254	4.69243	3.89044	3.85804	3.87496	5.0495e-06	0.776872	1.71341
A0A0P0W7K8	Os04g0233400	tr|A0A0P0W7K8|A0A0P0W7K8_ORYSJ;sp|Q7XLR1|PIP26_ORYSJ	276;281	tr|A0A0P0W7K8|A0A0P0W7K8_ORYSJ	tr|A0A0P0W7K8|A0A0P0W7K8_ORYSJ	>tr|A0A0P0W7K8|A0A0P0W7K8_ORYSJ Os04g0233400 protein (Fragment) OS=Oryza sativa subsp. japonica OX=39947 GN=Os04g0233400 PE=3 SV=1;>sp|Q7XLR1|PIP26_ORYSJ Probable aquaporin PIP2-6 OS=Oryza sativa subsp. japonica OX=39947 GN=PIP2-6 PE=2 SV=2	0.99997	2.84e-05	98.935	1;2	S	RAAAIKALGSFRSNPSN______________	X;X;X;X;X;X;X;X;X;X;X;X;Phospho (STY);X;X;Phospho (STY);X;X;X;X;X;X;X;X;X;X;X;X;X;X;X	XXXXXXPPPPPPPPPPPXXXXXXXXXXXXXX	ALGS(0.003)FRS(0.997)NPS(1)N	10	2	-0.3717			1126;1127;1132;1133;1134;1135;1136;1137;1139;1140;1141	1136	4.49549	4.51459	4.5648	3.68341	3.65086	3.6709	2.96567e-06	0.856572	1.81073
Q7XWP1	Os04g0252200	sp|Q7XWP1|CPSF1_ORYSJ	477	sp|Q7XWP1|CPSF1_ORYSJ	sp|Q7XWP1|CPSF1_ORYSJ	>sp|Q7XWP1|CPSF1_ORYSJ Probable cleavage and polyadenylation specificity factor subunit 1 OS=Oryza sativa subsp. japonica OX=39947 GN=Os04g0252200 PE=3 SV=2	0.98626	1.67e-08	59.117	1	S	IEGDLPFSKRLKRIPSDVLQDVTSVEELSFQ	X;X;X;X;X;X;X;X;X;X;X;X;X;X;X;Phospho (STY);X;X;X;X;X;X;X;X;X;X;X;X;X;X;X	XXXXXXXXXXXXPPPPPPPPPPPPPPPPPPP	RIPS(0.986)DVLQDVT(0.007)S(0.007)VEELS(0.001)FQNIIAPNSLESAQK	4	4	-0.079942			13536;13537;13538	13536	-3.28648	-3.82564	-3.76432	-4.20809	-4.24296	-4.44424	0.0222557	0.672952	1.59433
Q8H5N9	PIP2-1	sp|Q8H5N9|PIP21_ORYSJ	285	sp|Q8H5N9|PIP21_ORYSJ	sp|Q8H5N9|PIP21_ORYSJ	>sp|Q8H5N9|PIP21_ORYSJ Probable aquaporin PIP2-1 OS=Oryza sativa subsp. japonica OX=39947 GN=PIP2-1 PE=2 SV=1	1	0.00168511	62.944	2	S	YHQYILRAGAIKALGSFRSNA__________	X;X;X;X;X;X;X;X;X;X;X;X;X;X;X;Phospho (STY);X;X;Phospho (STY);X;X;X;X;X;X;X;X;X;X;X;X	XXXXXXXXXXXXPPPPPPPPPXXXXXXXXXX	ALGS(1)FRS(1)NA	4	2	-0.84385			1117;1118;1119;1120;1121;1122;1123;1124	1124	3.8382	3.80217	3.90387	2.64796	2.63777	2.62556	2.39352e-06	1.21098	2.31495
Q8H5N9	PIP2-1	sp|Q8H5N9|PIP21_ORYSJ	288	sp|Q8H5N9|PIP21_ORYSJ	sp|Q8H5N9|PIP21_ORYSJ	>sp|Q8H5N9|PIP21_ORYSJ Probable aquaporin PIP2-1 OS=Oryza sativa subsp. japonica OX=39947 GN=PIP2-1 PE=2 SV=1	1	0.00168511	62.944	1;2	S	YILRAGAIKALGSFRSNA_____________	X;X;X;X;X;X;X;X;X;X;X;X;Phospho (STY);X;X;Phospho (STY);X;X;X;X;X;X;X;X;X;X;X;X;X;X;X	XXXXXXXXXPPPPPPPPPXXXXXXXXXXXXX	ALGS(1)FRS(1)NA	7	2	-0.84385			1117;1118;1119;1120;1121;1122;1123;1124;1125	1124	3.90565	3.87534	3.96561	2.81594	2.8131	2.79723	2.1652e-06	1.10677	2.15364
Q9ST27	PHOT2	sp|Q9ST27|PHOT2_ORYSJ;tr|A0A0P0W8S4|A0A0P0W8S4_ORYSJ	298;162	sp|Q9ST27|PHOT2_ORYSJ	sp|Q9ST27|PHOT2_ORYSJ	>sp|Q9ST27|PHOT2_ORYSJ Phototropin-2 OS=Oryza sativa subsp. japonica OX=39947 GN=PHOT2 PE=1 SV=1;>tr|A0A0P0W8S4|A0A0P0W8S4_ORYSJ Os04g0304200 protein (Fragment) OS=Oryza sativa subsp. japonica OX=39947 GN=Os04g0304200 PE=4 SV=1	0.952187	3.52e-23	100.97	2;3	S	PGTPSGGGGGAGSFKSPLWDLKKEESRLSRL	X;X;Phospho (STY);X;X;X;X;X;X;X;X;X;Phospho (STY);X;X;Phospho (STY);X;X;X;X;X;X;X;X;X;X;X;X;X;X;X	PPPPPPPPPPPPPPPPPPPPPPXXXXXXXXX	MAAMS(0.993)PVVAPGT(0.006)PS(0.002)GGGGGAGS(0.047)FKS(0.952)PLWDLK	25	5	-0.17775			11399;11400;11401;11402;11404;11405;11406;11409;11410;11411;11413;11414;11415	11400	0.623784	0.665684	0.631029	-0.0470731	-0.0201824	0.0110086	6.36745e-06	0.658914	1.57889
A0A0N7KHZ6	Os03g0729200	tr|A0A0N7KHZ6|A0A0N7KHZ6_ORYSJ;tr|Q851F6|Q851F6_ORYSJ	66;196	tr|A0A0N7KHZ6|A0A0N7KHZ6_ORYSJ	tr|A0A0N7KHZ6|A0A0N7KHZ6_ORYSJ	>tr|A0A0N7KHZ6|A0A0N7KHZ6_ORYSJ Os03g0729200 protein (Fragment) OS=Oryza sativa subsp. japonica OX=39947 GN=Os03g0729200 PE=4 SV=1;>tr|Q851F6|Q851F6_ORYSJ Expressed protein OS=Oryza sativa subsp. japonica OX=39947 GN=LOC_Os03g51950 PE=2 SV=1	1	0.00288522	28.967	1	S	TFFNPASASVFSRFDSLKEAVKNYTIEATPD	X;X;X;X;X;X;X;X;X;X;X;X;X;X;X;Phospho (STY);X;X;X;X;X;X;X;X;X;X;X;X;X;X;X	XXXXXXXXXXXXXPPPPPPPPPXXXXXXXXX	FDS(1)LKEAVK	3	2	0.69762			5291;5292;5293;5294;5295;5296	5296	3.39967	3.44192	3.51459	2.24655	2.22003	2.3176	1.15333e-05	1.19067	2.28258
A0A0N7KLY1	Os06g0286351	tr|A0A0N7KLY1|A0A0N7KLY1_ORYSJ;tr|Q5VMT5|Q5VMT5_ORYSJ	1063;1545	tr|A0A0N7KLY1|A0A0N7KLY1_ORYSJ	tr|A0A0N7KLY1|A0A0N7KLY1_ORYSJ	>tr|A0A0N7KLY1|A0A0N7KLY1_ORYSJ Os06g0286351 protein OS=Oryza sativa subsp. japonica OX=39947 GN=Os06g0286351 PE=4 SV=1;>tr|Q5VMT5|Q5VMT5_ORYSJ Os06g0286351 protein OS=Oryza sativa subsp. japonica OX=39947 GN=Os06g0286351 PE=2 SV=1	0.999887	1.84e-05	60.007	1	S	KEEEPDDHNLNSKEESDNETLSVWKKRTAKA	X;X;X;X;X;X;X;X;X;X;X;X;X;X;X;Phospho (STY);X;X;X;X;X;X;X;X;X;X;X;X;X;X;X	XXXXXXXXXXXXXPPPPPPPPPPPPXXXXXX	EES(1)DNETLSVWK	3	3	0.63191			3906	3906	-2.52409	-2.20075	-2.23777	-2.86492	-3.00648	-2.8775	0.00596969	0.595434	1.51093
A0A0P0VIH5	Os02g0437200	tr|A0A0P0VIH5|A0A0P0VIH5_ORYSJ	38	tr|A0A0P0VIH5|A0A0P0VIH5_ORYSJ	tr|A0A0P0VIH5|A0A0P0VIH5_ORYSJ	>tr|A0A0P0VIH5|A0A0P0VIH5_ORYSJ Os02g0437200 protein OS=Oryza sativa subsp. japonica OX=39947 GN=Os02g0437200 PE=4 SV=1	0.985311	3.1e-05	82.626	1	S	DSDDGGREQRPARASSVPPPADQRGSLFGGG	X;X;X;X;X;X;X;X;X;X;X;X;X;X;X;Phospho (STY);X;X;X;X;X;X;X;X;X;X;X;X;X;X;X	XXXXXXXXXXXXXPPPPPPPPPPPXXXXXXX	AS(0.015)S(0.985)VPPPADQR	3	2	-0.37229			1923;1924;1925;1926	1924	1.04348	1.1272	1.16776	0.54776	0.51296	0.510058	0.000106808	0.589218	1.50443
A0A0P0VZP7	Os03g0431800	tr|A0A0P0VZP7|A0A0P0VZP7_ORYSJ	621	tr|A0A0P0VZP7|A0A0P0VZP7_ORYSJ	tr|A0A0P0VZP7|A0A0P0VZP7_ORYSJ	>tr|A0A0P0VZP7|A0A0P0VZP7_ORYSJ Os03g0431800 protein (Fragment) OS=Oryza sativa subsp. japonica OX=39947 GN=Os03g0431800 PE=4 SV=1	0.872328	5.26e-08	54.459	1	S	SSDAITSDALYDPSESPKSSKSEKQDPLSSA	X;X;X;X;X;X;X;X;X;X;X;X;X;X;X;Phospho (STY);X;X;X;X;X;X;X;X;X;X;X;X;X;X;X	PPPPPPPPPPPPPPPPPPXXXXXXXXXXXXX	TALGVALPVSWLGDSSDAITSDALYDPS(0.125)ES(0.872)PK	30	4	0.40153			16527	16527	-5.28308	-5.33179	-5.26448	-5.87626	-5.6987	-6.18256	0.0118179	0.626058	1.54334
A0A0P0WAD7	Os04g0423600	tr|A0A0P0WAD7|A0A0P0WAD7_ORYSJ	47	tr|A0A0P0WAD7|A0A0P0WAD7_ORYSJ	tr|A0A0P0WAD7|A0A0P0WAD7_ORYSJ	>tr|A0A0P0WAD7|A0A0P0WAD7_ORYSJ Os04g0423600 protein OS=Oryza sativa subsp. japonica OX=39947 GN=Os04g0423600 PE=3 SV=1	0.999938	1.56e-11	83.544	1	S	RSGDDYGRDTGLFNESGNDDNESGYKNTNTD	X;X;X;X;X;X;X;X;X;X;X;X;X;X;X;Phospho (STY);X;X;X;X;X;X;X;X;X;X;X;X;X;X;X	XXXXXXXXPPPPPPPPPPPPPPPPPPXXXXX	DTGLFNES(1)GNDDNESGYK	8	3	0.72487			3442;3443	3443	-0.222652	-0.210243	-0.232281	-0.981196	-0.863181	-1.10414	0.000402845	0.761113	1.6948
A0A0P0WAD7	Os04g0423600	tr|A0A0P0WAD7|A0A0P0WAD7_ORYSJ	119	tr|A0A0P0WAD7|A0A0P0WAD7_ORYSJ	tr|A0A0P0WAD7|A0A0P0WAD7_ORYSJ	>tr|A0A0P0WAD7|A0A0P0WAD7_ORYSJ Os04g0423600 protein OS=Oryza sativa subsp. japonica OX=39947 GN=Os04g0423600 PE=3 SV=1	0.789239	2.22e-08	76.174	1	S	YSSSGGYSKSGTDNYSGSGGYNKSGNNDYSG	X;Phospho (STY);Phospho (STY);X;X;X;X;X;X;X;X;X;X;X;X;Phospho (STY);X;X;X;X;X;X;X;X;X;X;X;X;X;X;X	XXXXXXXXXPPPPPPPPPPPPPPXXXXXXXX	S(0.001)GT(0.037)DNYS(0.789)GS(0.172)GGYNK	7	2	-0.54828			14874	14874	-0.131655	0.0107097	-0.0954222	-0.716892	-0.676177	-0.675473	0.000161467	0.617392	1.5341
A0A0P0WJI6	Os05g0232200	tr|A0A0P0WJI6|A0A0P0WJI6_ORYSJ	158	tr|A0A0P0WJI6|A0A0P0WJI6_ORYSJ	tr|A0A0P0WJI6|A0A0P0WJI6_ORYSJ	>tr|A0A0P0WJI6|A0A0P0WJI6_ORYSJ Os05g0232200 protein (Fragment) OS=Oryza sativa subsp. japonica OX=39947 GN=Os05g0232200 PE=4 SV=1	0.995456	1.16e-05	78.72	1	S	NISREGDESSVRKSMSLDDLQEKAVFSAIIV	X;X;X;X;X;X;X;X;X;X;X;X;X;X;X;Phospho (STY);X;X;X;X;X;X;X;X;X;X;X;X;X;X;X	XXXXXXXXXXXXPPPPPPPPPPPXXXXXXXX	S(0.005)MS(0.995)LDDLQEK	3	2	0.81365			9476;9477;9478;15303;15304;15306;15309;15310	15309	3.48987	3.50407	3.55057	2.79662	2.76441	2.80889	5.65796e-06	0.724862	1.65274
B7E4J4	Os05g0382600	tr|B7E4J4|B7E4J4_ORYSJ	13	tr|B7E4J4|B7E4J4_ORYSJ	tr|B7E4J4|B7E4J4_ORYSJ	>tr|B7E4J4|B7E4J4_ORYSJ Os05g0382600 protein OS=Oryza sativa subsp. japonica OX=39947 GN=Os05g0382600 PE=2 SV=1	1	8.11e-27	145.25	1	S	___MADEIQHLTRAFSGLGGLGVDEPAMVSA	X;X;X;X;X;X;X;X;X;X;X;X;X;X;X;Phospho (STY);X;X;X;X;X;X;X;X;X;X;X;Oxidation (M);X;X;X	XXXXXXXXXXXXXPPPPPPPPPPPPPPPPPP	AFS(1)GLGGLGVDEPAMVSALAK	3	4	0.045027			643;644;645;646;647;648;649;650;651;652;653;654;655;656;657;658	657	0.910344	0.929113	0.970076	0.302854	0.326227	0.18784	0.000136752	0.664204	1.58469
B9FJ38	Os05g0223000	tr|B9FJ38|B9FJ38_ORYSJ	13	tr|B9FJ38|B9FJ38_ORYSJ	tr|B9FJ38|B9FJ38_ORYSJ	>tr|B9FJ38|B9FJ38_ORYSJ Os05g0223000 protein OS=Oryza sativa subsp. japonica OX=39947 GN=Os05g0223000 PE=4 SV=1	0.984285	4.63e-08	94.071	1	S	___MASGRGGGGGVASPTPAKVEGGGGGGGG	X;X;X;X;X;X;X;X;X;X;X;X;X;X;X;Phospho (STY);X;X;X;X;X;X;X;X;X;X;X;X;X;X;X	XXXXXXXXPPPPPPPPPPPPPXXXXXXXXXX	GGGGGVAS(0.984)PT(0.016)PAK	8	2	0.013143			6415;6416;6417	6417	1.80519	1.88349	1.85876	1.25271	1.24306	1.26751	1.62105e-05	0.594722	1.51018
Q0DG76	Os05g0549100	tr|Q0DG76|Q0DG76_ORYSJ	548	tr|Q0DG76|Q0DG76_ORYSJ	tr|Q0DG76|Q0DG76_ORYSJ	>tr|Q0DG76|Q0DG76_ORYSJ Os05g0549100 protein OS=Oryza sativa subsp. japonica OX=39947 GN=Os05g0549100 PE=4 SV=1	0.996561	4.19e-27	187.9	2	S	RTINESMDELSSQSKSIWWSRWIPKEE____	X;Phospho (STY);X;X;X;Phospho (STY);Oxidation (M);X;X;X;Phospho (STY);Phospho (STY);X;X;X;Phospho (STY);X;X;X;X;X;X;X;X;X;X;X;X;X;X;X	XPPPPPPPPPPPPPPPPPPPPXXXXXXXXXX	TINES(0.997)MDELS(0.002)S(0.001)QS(0.003)KS(0.997)IWWSR	15	3	-0.94276			16967;16968;16969;16971;16972;16973	16967	1.86744	1.83839	1.92922	0.456083	0.54027	0.540238	3.87805e-06	1.36615	2.57782
Q0DIJ3	Os05g0384800	tr|Q0DIJ3|Q0DIJ3_ORYSJ	965	tr|Q0DIJ3|Q0DIJ3_ORYSJ	tr|Q0DIJ3|Q0DIJ3_ORYSJ	>tr|Q0DIJ3|Q0DIJ3_ORYSJ Os05g0384800 protein OS=Oryza sativa subsp. japonica OX=39947 GN=Os05g0384800 PE=3 SV=1	0.882589	6.56e-08	52.845	1	S	ISIPTDISVASESLGSPRSSGEPCSNGSNGL	X;X;X;X;X;X;X;X;X;X;X;X;X;X;X;Phospho (STY);X;X;X;X;X;X;X;X;X;X;X;X;X;X;X	PPPPPPPPPPPPPPPPPPXXXXXXXXXXXXX	LPPLPGISIPTDIS(0.001)VAS(0.029)ES(0.087)LGS(0.883)PR	22	3	-1.1851			10714;10715	10714	-4.18021	-4.20615	-4.54249	-4.88357	-4.71652	-5.35833	0.0396133	0.676522	1.59828
Q75IQ9	Os05g0164100	tr|Q75IQ9|Q75IQ9_ORYSJ;tr|Q0DKG9|Q0DKG9_ORYSJ	298;298	tr|Q75IQ9|Q75IQ9_ORYSJ	tr|Q75IQ9|Q75IQ9_ORYSJ	>tr|Q75IQ9|Q75IQ9_ORYSJ Os05g0164100 protein OS=Oryza sativa subsp. japonica OX=39947 GN=Os05g0164100 PE=4 SV=1;>tr|Q0DKG9|Q0DKG9_ORYSJ Os05g0164100 protein OS=Oryza sativa subsp. japonica OX=39947 GN=Os05g0164100 PE=4 SV=1	0.9994	8.15e-05	152.61	1	S	DSFKKLQVSGIVESKSVDTLTTLQKQDGQKG	X;Phospho (STY);X;X;X;X;X;X;X;X;X;X;X;X;X;Phospho (STY);X;X;X;X;X;X;X;X;X;X;X;X;X;X;X	XXXXXXXXXXXXXXXPPPPPPPPPPXXXXXX	S(0.999)VDT(0.001)LTTLQK	1	2	1.1274			16173;16174;16175;16176;16177;16178;16179;16180;16181;16182	16174	3.69977	3.70075	3.71663	2.85395	2.79844	2.80285	1.16369e-06	0.887303	1.84972
Q0E0T0	Os02g0525600	tr|Q0E0T0|Q0E0T0_ORYSJ	41	tr|Q0E0T0|Q0E0T0_ORYSJ	tr|Q0E0T0|Q0E0T0_ORYSJ	>tr|Q0E0T0|Q0E0T0_ORYSJ Os02g0525600 protein OS=Oryza sativa subsp. japonica OX=39947 GN=Os02g0525600 PE=4 SV=1	0.773721	7.49e-13	83.33	1	S	TGAAASSPRTMRRSFSNASSGSHGGGGGAKC	X;X;X;X;X;X;X;X;X;X;X;X;X;X;X;Phospho (STY);X;X;X;X;X;X;X;X;X;X;X;X;X;X;X	XXXXXXXXXXXXXPPPPPPPPPPPPPPPPPX	S(0.148)FS(0.774)NAS(0.06)S(0.014)GS(0.004)HGGGGGAK	3	3	1.0814			14579	14579	-0.806163	-0.82607	-0.800871	-1.57283	-1.64525	-1.73336	5.79625e-05	0.839446	1.78936
Q0E447	Os02g0137100	tr|Q0E447|Q0E447_ORYSJ	267	tr|Q0E447|Q0E447_ORYSJ	tr|Q0E447|Q0E447_ORYSJ	>tr|Q0E447|Q0E447_ORYSJ Os02g0137100 protein OS=Oryza sativa subsp. japonica OX=39947 GN=Os02g0137100 PE=2 SV=1	0.915047	1.67e-14	85.458	1	S	DSSSFGFLSQIPRNFSFSDLTEDFSQSAEIL	X;X;X;X;X;X;X;X;X;X;X;X;X;X;X;Phospho (STY);X;X;X;X;X;X;X;X;X;X;X;X;X;X;X	XXXXXXXXXXXXXPPPPPPPPPPPPPPPPPP	NFS(0.915)FS(0.081)DLT(0.003)EDFSQSAEILENYGR	3	3	-1.1489			12079;12080;12081	12080	-3.38079	-3.52981	-3.23321	-4.14236	-3.63027	-4.3248	0.0442745	0.651208	1.57048
Q0JD14	Os04g0437600	tr|Q0JD14|Q0JD14_ORYSJ	634	tr|Q0JD14|Q0JD14_ORYSJ	tr|Q0JD14|Q0JD14_ORYSJ	>tr|Q0JD14|Q0JD14_ORYSJ Os04g0437600 protein OS=Oryza sativa subsp. japonica OX=39947 GN=Os04g0437600 PE=2 SV=1	0.973481	1.26e-06	55.688	3	S	SPHTASPISVVRTNMSLPVSPCSSPLRQFKQ	Phospho (STY);X;X;X;X;Phospho (STY);X;X;X;X;X;X;X;X;X;Phospho (STY);X;X;X;Phospho (STY);X;X;Phospho (STY);Phospho (STY);X;X;X;X;X;X;X	XXXXXXXXXXXXPPPPPPPPPPPPPPPXXXX	T(0.031)NMS(0.973)LPVS(0.995)PCS(0.147)S(0.854)PLR	4	3	-0.3426			17174;17175;17176;17177;17178;17179	17178	-0.915141	-0.85681	-0.979124	-1.59806	-1.34319	-1.57999	0.00272893	0.590053	1.5053
Q0JEB7	Os04g0301500	tr|Q0JEB7|Q0JEB7_ORYSJ	199	tr|Q0JEB7|Q0JEB7_ORYSJ	tr|Q0JEB7|Q0JEB7_ORYSJ	>tr|Q0JEB7|Q0JEB7_ORYSJ Os04g0301500 protein OS=Oryza sativa subsp. japonica OX=39947 GN=Os04g0301500 PE=2 SV=1	0.977969	1.17e-22	103.54	1	S	PSSSSERTKKVKRALSVSSISDALLAAAAPA	X;X;X;X;X;X;X;X;X;X;X;X;X;X;X;Phospho (STY);X;X;X;X;X;X;X;X;X;X;X;X;X;X;X	XXXXXXXXXXXXXPPPPPPPPPPPPPPPPPP	ALS(0.978)VS(0.02)S(0.002)ISDALLAAAAPAPPVEIQELR	3	3	-0.67386			1254;1255;1256;1257	1256	-4.30393	-4.79105	-4.32944	-5.19725	-4.99714	-5.51212	0.0251346	0.760695	1.69431
Q2QVD6	LOC_Os12g13170	tr|Q2QVD6|Q2QVD6_ORYSJ	155	tr|Q2QVD6|Q2QVD6_ORYSJ	tr|Q2QVD6|Q2QVD6_ORYSJ	>tr|Q2QVD6|Q2QVD6_ORYSJ BZIP transcription factor family protein, expressed OS=Oryza sativa subsp. japonica OX=39947 GN=LOC_Os12g13170 PE=2 SV=1	0.983003	7.4e-07	62.519	2	S	GKEKSPIKRSKGSLGSLNMITGKNSTEHGKT	X;X;X;X;X;X;X;X;X;Phospho (STY);X;X;Phospho (STY);X;X;Phospho (STY);X;X;X;X;X;X;X;X;X;X;X;X;X;X;X	XXXXXXXXXPPPPPPPPPPPPPPXXXXXXXX	S(0.234)KGS(0.668)LGS(0.983)LNMIT(0.115)GK	7	3	0.29443			15000;15001	15000	0.569039	0.680113	0.763923	-0.229795	-0.281282	-0.307895	0.000101224	0.944016	1.92388
Q5Z811	Os06g0703900	tr|Q5Z811|Q5Z811_ORYSJ	65	tr|Q5Z811|Q5Z811_ORYSJ	tr|Q5Z811|Q5Z811_ORYSJ	>tr|Q5Z811|Q5Z811_ORYSJ Os06g0703900 protein OS=Oryza sativa subsp. japonica OX=39947 GN=Os06g0703900 PE=2 SV=1	0.756252	2.83e-05	69.883	1	S	SSQSSSIKIELIRSSSLPNILPFQKRSSEPE	X;X;X;X;X;X;X;X;X;X;X;X;X;X;X;Phospho (STY);X;X;X;X;X;X;X;X;X;X;X;X;X;X;X	XXXXXXXXXXXXXPPPPPPPPPPPPXXXXXX	S(0.122)S(0.122)S(0.756)LPNILPFQK	3	3	1.1503			15911;15912	15911	-2.04634	-1.94816	-1.79998	-2.68443	-2.60702	-2.55949	0.00103485	0.685486	1.60824
Q60EI6	Os05g0502500	tr|Q60EI6|Q60EI6_ORYSJ	208	tr|Q60EI6|Q60EI6_ORYSJ	tr|Q60EI6|Q60EI6_ORYSJ	>tr|Q60EI6|Q60EI6_ORYSJ Os05g0502500 protein OS=Oryza sativa subsp. japonica OX=39947 GN=Os05g0502500 PE=4 SV=1	0.939993	2.03e-12	113.42	1	S	FSSGRTTTGAQAFSESFKRGSEGKKTPSGTV	X;X;X;X;X;X;X;X;X;X;X;X;X;X;X;Phospho (STY);X;X;X;X;X;X;X;X;X;X;X;X;X;X;X	XXXXXPPPPPPPPPPPPPPXXXXXXXXXXXX	TTTGAQAFS(0.06)ES(0.94)FKR	11	3	-0.96313			17539;17540	17540	1.39202	1.44471	1.41084	0.468592	0.483532	0.561256	9.73688e-06	0.911397	1.88087
Q652J5	Os09g0532700	tr|Q652J5|Q652J5_ORYSJ	259	tr|Q652J5|Q652J5_ORYSJ	tr|Q652J5|Q652J5_ORYSJ	>tr|Q652J5|Q652J5_ORYSJ Os09g0532700 protein OS=Oryza sativa subsp. japonica OX=39947 GN=Os09g0532700 PE=4 SV=1	0.975687	0.00518368	60.018	1	S	PLKGTSARSILKKTLSQINVKTGVASSGSDG	X;X;X;X;X;X;X;X;X;X;X;X;X;X;X;Phospho (STY);X;X;X;X;X;X;X;X;X;X;X;X;X;X;X	XXXXXXXXXXXXXPPPPPPPPXXXXXXXXXX	T(0.024)LS(0.976)QINVK	3	2	1.3392			17138	17138	-0.890587	-0.851699	-0.912693	-1.61335	-1.7165	-1.74268	4.91413e-05	0.805849	1.74817
Q6ZHS1	Os02g0188000	tr|Q6ZHS1|Q6ZHS1_ORYSJ	250	tr|Q6ZHS1|Q6ZHS1_ORYSJ	tr|Q6ZHS1|Q6ZHS1_ORYSJ	>tr|Q6ZHS1|Q6ZHS1_ORYSJ Glycosyltransferase OS=Oryza sativa subsp. japonica OX=39947 GN=Os02g0188000 PE=3 SV=1	0.768094	1.77e-10	60.521	1	S	ELERDVVDALRGVATSPPPPPLIPVGPLIEL	X;X;X;X;X;X;X;X;X;X;X;X;X;X;X;Phospho (STY);X;X;X;X;X;X;X;X;X;X;X;X;X;X;X	XXXXXXXXXXXPPPPPPPPPPPPPPPPPPPP	GVAT(0.232)S(0.768)PPPPPLIPVGPLIELEGDAAVR	5	3	-0.16303			7528;7529;7530	7529	-3.93822	-4.15321	-3.90701	-4.82639	-5.09904	-4.73556	0.0026845	0.887513	1.84998
Q7F2G3	Os01g0639900	tr|Q7F2G3|Q7F2G3_ORYSJ	264	tr|Q7F2G3|Q7F2G3_ORYSJ	tr|Q7F2G3|Q7F2G3_ORYSJ	>tr|Q7F2G3|Q7F2G3_ORYSJ Carbonic anhydrase OS=Oryza sativa subsp. japonica OX=39947 GN=Os01g0639900 PE=2 SV=1	1	1.22e-11	83.405	1	S	ANGTLKLVGGHYDFVSGNLDLWEP_______	X;X;X;X;X;X;X;X;X;X;X;X;X;X;X;Phospho (STY);X;X;X;X;X;X;X;X;X;X;X;X;X;X;X	XXXXXXPPPPPPPPPPPPPPPPPPXXXXXXX	LVGGHYDFVS(1)GNLDLWEP	10	3	0.62937			11210;11211;11212;11213	11213	-1.01989	-1.11067	-1.03034	-1.7175	-1.58713	-1.62595	0.000254398	0.589895	1.50514
Q7G649	LOC_Os10g18340	tr|Q7G649|Q7G649_ORYSJ	9	tr|Q7G649|Q7G649_ORYSJ	tr|Q7G649|Q7G649_ORYSJ	>tr|Q7G649|Q7G649_ORYSJ Expressed protein OS=Oryza sativa subsp. japonica OX=39947 GN=LOC_Os10g18340 PE=2 SV=1	0.995357	5.05e-05	92.056	1	S	_______MAEENKSGSGDLMASGKVVAEATM	X;X;X;X;X;X;X;X;X;X;X;X;X;X;X;Phospho (STY);X;X;X;Oxidation (M);X;X;X;X;X;X;X;X;X;X;X	XXXXXXXXXXXXXPPPPPPPPPPPXXXXXXX	S(0.003)GS(0.995)GDLMAS(0.002)GK	3	2	-0.37179			14724;14725;14727;14728;14729;14731;14732;14733;14735;14736;14737	14736	3.23139	3.23475	3.2714	2.55285	2.52403	2.58981	7.27595e-06	0.690282	1.6136
Q7X8A1	Os04g0459500	tr|Q7X8A1|Q7X8A1_ORYSJ	116	tr|Q7X8A1|Q7X8A1_ORYSJ	tr|Q7X8A1|Q7X8A1_ORYSJ	>tr|Q7X8A1|Q7X8A1_ORYSJ Glyceraldehyde-3-phosphate dehydrogenase OS=Oryza sativa subsp. japonica OX=39947 GN=Os04g0459500 PE=2 SV=1	0.8144	8.83e-21	92.066	1	S	DTGGVKQASHLLKYDSTLGIFDADVKPVGDN	X;X;X;X;X;X;X;X;X;X;X;X;X;X;X;Phospho (STY);X;X;X;X;X;X;X;X;X;X;X;X;X;X;X	XXXXXXXXXXXXXPPPPPPPPPPPPPPPPPP	YDS(0.814)T(0.185)LGIFDADVKPVGDNAISVDGK	3	3	-0.073306			19708	19708	-1.40426	-1.32966	-1.29164	-2.18235	-2.15117	-2.16408	1.779e-05	0.82401	1.77032
Q84NW1	Os07g0513000	tr|Q84NW1|Q84NW1_ORYSJ	332	tr|Q84NW1|Q84NW1_ORYSJ	tr|Q84NW1|Q84NW1_ORYSJ	>tr|Q84NW1|Q84NW1_ORYSJ Os07g0513000 protein OS=Oryza sativa subsp. japonica OX=39947 GN=Os07g0513000 PE=2 SV=1	0.985928	0.00215194	50.505	1	S	MSSATDNAIELRKNLSMVYNRQRQAKITGEI	X;X;X;X;X;X;X;X;X;X;X;X;X;X;X;Phospho (STY);X;X;X;X;X;X;X;X;X;X;X;X;X;X;X	XXXXXXXXXXXXPPPPPPPPPXXXXXXXXXX	NLS(0.986)MVY(0.014)NR	3	2	-1.3902			9263;9264;12262;12263;12264;12265	12262	2.74633	2.81843	2.82031	1.86692	1.85344	1.83724	3.36217e-06	0.94249	1.92184
P12085	atpB	sp|P12085|ATPB_ORYSJ	7	sp|P12085|ATPB_ORYSJ	sp|P12085|ATPB_ORYSJ	>sp|P12085|ATPB_ORYSJ ATP synthase subunit beta, chloroplastic OS=Oryza sativa subsp. japonica OX=39947 GN=atpB PE=1 SV=2	0.84051	1.44e-08	69.217	1	T	_________MRTNPTTSRPGVSTIEEKSTGR	X;X;X;X;X;X;X;X;X;X;X;X;X;X;X;Phospho (STY);X;X;X;X;X;X;X;X;X;X;X;X;X;X;X	XXXXXXXXXXXPPPPPPPPPPPPPPPPXXXX	T(0.001)NPT(0.05)T(0.841)S(0.109)RPGVSTIEEK	5	3	-0.24782			17196	17196	0.17907	0.263912	0.370908	-0.73276	-0.614904	-0.506342	0.00048827	0.889299	1.85228
Q6AVA8	PPDK1	sp|Q6AVA8|PPDK1_ORYSJ;sp|Q75KR1|PPDK2_ORYSJ	527;467	sp|Q6AVA8|PPDK1_ORYSJ	sp|Q6AVA8|PPDK1_ORYSJ	>sp|Q6AVA8|PPDK1_ORYSJ Pyruvate, phosphate dikinase 1, chloroplastic OS=Oryza sativa subsp. japonica OX=39947 GN=PPDK1 PE=1 SV=1;>sp|Q75KR1|PPDK2_ORYSJ Pyruvate, phosphate dikinase 2 OS=Oryza sativa subsp. japonica OX=39947 GN=PPDK2 PE=3 SV=1	0.961971	2.26e-07	131.71	1	T	GMHAAVGILTARGGMTSHAAVVARGWGKCCV	X;X;X;X;X;X;X;X;X;X;X;X;X;X;Oxidation (M);Phospho (STY);X;X;X;X;X;X;X;X;X;X;X;X;X;X;X	XXXXXXXXXXXXPPPPPPPPPPPPXXXXXXX	GGMT(0.962)S(0.038)HAAVVAR	4	2	-0.35625			6466;6467;6468;6471;6472;6473;6474;6475;6476;6477;6478;6479;6480;6481;6482;6483	6471	3.29703	3.37894	3.41748	2.55031	2.49548	2.56088	3.49663e-05	0.828924	1.77636
Q2QWN3	LOC_Os12g08770	tr|Q2QWN3|Q2QWN3_ORYSJ	98	tr|Q2QWN3|Q2QWN3_ORYSJ	tr|Q2QWN3|Q2QWN3_ORYSJ	>tr|Q2QWN3|Q2QWN3_ORYSJ Os12g0189400 protein OS=Oryza sativa subsp. japonica OX=39947 GN=LOC_Os12g08770 PE=2 SV=1	0.965281	5.23e-14	81.083	1	T	KKRLATSGANFARAYTVEFGSCQFPYNFTGC	X;X;X;X;X;X;X;X;X;X;X;X;X;X;X;Phospho (STY);X;X;X;X;X;X;X;X;X;X;X;X;X;X;X	XXXXXXXXXXXXXPPPPPPPPPPPPPPPPPP	AY(0.002)T(0.965)VEFGS(0.024)CQFPY(0.008)NFT(0.001)GCQDLAK	3	3	-0.6314			2435;2436;2437	2436	-1.51141	-1.58928	-1.55296	-2.3083	-2.34335	-2.52681	0.000296313	0.841604	1.79204
Q69WH2	Os06g0332800	tr|Q69WH2|Q69WH2_ORYSJ	47	tr|Q69WH2|Q69WH2_ORYSJ	tr|Q69WH2|Q69WH2_ORYSJ	>tr|Q69WH2|Q69WH2_ORYSJ Os06g0332800 protein OS=Oryza sativa subsp. japonica OX=39947 GN=Os06g0332800 PE=2 SV=1	0.992056	0.00131307	101.26	1	T	PVSRFSRFQSVKTKATENDQTEKSPPKGSSL	X;X;X;X;X;X;X;X;X;X;X;X;X;X;X;Phospho (STY);X;X;X;X;X;X;X;X;X;X;X;X;X;X;X	XXXXXXXXXXXXXXPPPPPPPPPXXXXXXXX	AT(0.992)ENDQT(0.008)EK	2	2	-0.015101			1971;1972;1973	1971	1.30145	1.33726	1.35838	0.396601	0.284001	0.334049	1.08809e-05	0.994146	1.9919
Q7XV11	Os04g0457000	tr|Q7XV11|Q7XV11_ORYSJ	203	tr|Q7XV11|Q7XV11_ORYSJ	tr|Q7XV11|Q7XV11_ORYSJ	>tr|Q7XV11|Q7XV11_ORYSJ Chlorophyll a-b binding protein, chloroplastic OS=Oryza sativa subsp. japonica OX=39947 GN=Os04g0457000 PE=2 SV=1	1	3.42e-14	109.68	1	T	YPGGKFFDPLGLGGETRDGVYIPDTDKLDRL	X;X;X;X;X;X;X;X;X;X;X;X;X;X;X;Phospho (STY);X;X;X;X;X;X;X;X;X;X;X;X;X;X;X	XXXXXPPPPPPPPPPPPPPPPPPPPPPPPPX	FFDPLGLGGET(1)R	11	2	0.21067			5455;5456;5457;5458	5456	-0.445226	-0.285285	-0.367829	-1.17281	-1.13038	-1.05531	0.000196649	0.753386	1.68574
Q9FP25	P0035H10.18	tr|Q9FP25|Q9FP25_ORYSJ	50	tr|Q9FP25|Q9FP25_ORYSJ	tr|Q9FP25|Q9FP25_ORYSJ	>tr|Q9FP25|Q9FP25_ORYSJ Os01g0303000 protein OS=Oryza sativa subsp. japonica OX=39947 GN=P0035H10.18 PE=2 SV=1	0.996222	4.02e-06	68.643	1	T	VGRGGFAAVRASGPATPPDISDKMSESIDKA	X;X;X;X;X;X;X;X;X;X;X;X;X;X;X;Phospho (STY);X;X;X;X;X;X;X;Oxidation (M);X;X;X;X;X;X;X	XXXXXXXXXXPPPPPPPPPPPPPXXXXXXXX	AS(0.002)GPAT(0.996)PPDIS(0.001)DK	6	2	0.56164			1750;1751;1754;1757	1754	1.64344	1.64641	1.76943	-1.32479	-0.980703	-1.28797	1.59114e-05	2.88425	7.3832

## Sheet: SUPPLEMENTARY TABLE 4-2
SUPPLEMENTARY TABLE 4-2 Phosphopeptides that accumulated to significantly different levels between ZmPP2C26S-OE and the wild-type.
Accession	Gene Name	Proteins	Positions within proteins	Leading proteins	Protein	Fasta headers	Localization prob	PEP	Delta score	Number of Phospho (STY)	Amino acid	Sequence window	Modification window	Peptide window coverage	Phospho (STY) Probabilities	Position in peptide	Charge	Mass error [ppm]	Reverse	Potential contaminant	MS/MS IDs	Best localization MS/MS ID	S-1	S-2	S-3	Nip-1	Nip-2	Nip-3	P-value	log2(FC)	FC
Q0JD07	Os04g0438700	sp|Q0JD07|C3H28_ORYSJ	88	sp|Q0JD07|C3H28_ORYSJ	sp|Q0JD07|C3H28_ORYSJ	>sp|Q0JD07|C3H28_ORYSJ Zinc finger CCCH domain-containing protein 28 OS=Oryza sativa subsp. japonica OX=39947 GN=Os04g0438700 PE=2 SV=1	0.996236	0.00273605	37.269	2	S	RGRSRSRSRSRSRGRSASPRYPDGKRRRHND	X;X;X;X;X;X;X;X;X;X;X;X;X;X;X;Phospho (STY);X;Phospho (STY);X;X;X;X;X;X;X;X;X;X;X;X;X	XXXXXXXXXXXXXPPPPPPPPPPPPXXXXXX	GRS(0.996)AS(0.988)PRY(0.016)PDGK	3	3	0.66987			7293	7293	-0.648996	-0.774555	-0.825579	0.0689586	-0.355995	0.101722	0.0117231	-0.687939	0.62074
Q0JD07	Os04g0438700	sp|Q0JD07|C3H28_ORYSJ	90	sp|Q0JD07|C3H28_ORYSJ	sp|Q0JD07|C3H28_ORYSJ	>sp|Q0JD07|C3H28_ORYSJ Zinc finger CCCH domain-containing protein 28 OS=Oryza sativa subsp. japonica OX=39947 GN=Os04g0438700 PE=2 SV=1	0.987507	0.00273605	37.269	2	S	RSRSRSRSRSRGRSASPRYPDGKRRRHNDLN	X;X;X;X;X;X;X;X;X;X;X;X;X;Phospho (STY);X;Phospho (STY);X;X;X;X;X;X;X;X;X;X;X;X;X;X;X	XXXXXXXXXXXPPPPPPPPPPPPXXXXXXXX	GRS(0.996)AS(0.988)PRY(0.016)PDGK	5	3	0.66987			7293	7293	-0.648996	-0.774555	-0.825579	0.0689586	-0.355995	0.101722	0.0117231	-0.687939	0.62074
A0A0P0VC18	Os01g0917400	tr|A0A0P0VC18|A0A0P0VC18_ORYSJ;tr|A0A0P0VC32|A0A0P0VC32_ORYSJ;sp|Q5JLB5|C3H12_ORYSJ	41;131;242	tr|A0A0P0VC18|A0A0P0VC18_ORYSJ	tr|A0A0P0VC18|A0A0P0VC18_ORYSJ	>tr|A0A0P0VC18|A0A0P0VC18_ORYSJ Os01g0917400 protein (Fragment) OS=Oryza sativa subsp. japonica OX=39947 GN=Os01g0917400 PE=4 SV=1;>tr|A0A0P0VC32|A0A0P0VC32_ORYSJ Os01g0917400 protein (Fragment) OS=Oryza sativa subsp. japonica OX=39947 GN=Os01g0917400 PE=4	0.999968	0.00788465	45.962	1	S	GTMASWAFPRGSFIPSPRWQNPSNYAPMIVP	X;X;X;X;X;X;X;X;X;X;X;X;X;X;X;Phospho (STY);X;X;X;X;X;X;X;X;X;X;X;X;X;X;X	XXXXXXXXXXPPPPPPPPXXXXXXXXXXXXX	GSFIPS(1)PR	6	2	2.666			7353;7354;7355	7355	0.585465	0.681757	0.651191	1.32998	1.31024	1.31402	1.98923e-05	-0.67861	0.624767
A0A0P0UZB5	Os01g0199700	tr|A0A0P0UZB5|A0A0P0UZB5_ORYSJ	45	tr|A0A0P0UZB5|A0A0P0UZB5_ORYSJ	tr|A0A0P0UZB5|A0A0P0UZB5_ORYSJ	>tr|A0A0P0UZB5|A0A0P0UZB5_ORYSJ Os01g0199700 protein OS=Oryza sativa subsp. japonica OX=39947 GN=Os01g0199700 PE=4 SV=1	1	0.000182232	61.282	1	S	EKPRRISMEGLQRAMSDLALELTKKQQVADA	X;X;X;X;X;X;X;X;X;X;X;X;X;X;X;Phospho (STY);X;X;X;X;X;X;X;X;X;X;X;X;X;X;X	XXXXXXXXXXXXXPPPPPPPPPPPXXXXXXX	AMS(1)DLALELTK	3	3	0.30456			1346;1347;1348	1347	-2.73098	-2.55863	-2.81732	-1.98469	-1.74736	-1.98749	0.0019415	-0.795797	0.576025
A0A0P0XLG1	Os09g0315700	tr|A0A0P0XLG1|A0A0P0XLG1_ORYSJ	21	tr|A0A0P0XLG1|A0A0P0XLG1_ORYSJ	tr|A0A0P0XLG1|A0A0P0XLG1_ORYSJ	>tr|A0A0P0XLG1|A0A0P0XLG1_ORYSJ Phosphoenolpyruvate carboxylase OS=Oryza sativa subsp. japonica OX=39947 GN=Os09g0315700 PE=3 SV=1	0.99113	0.00173679	89.633	1	S	AAGGGGGVGKVERLSSIDAQLRQLVPAKLSE	X;X;X;X;X;X;X;X;X;X;X;X;X;X;X;Phospho (STY);X;X;X;X;X;X;X;X;X;X;X;X;X;X;X	XXXXXXXXXXXXXPPPPPPPPPXXXXXXXXX	LS(0.009)S(0.991)IDAQLR	3	2	-0.027915			10985;10986;10987	10985	1.57514	1.53779	1.54766	2.16642	2.14308	2.11765	5.18313e-06	-0.588854	0.664871
A3AYP1	Os04g0679400	tr|A3AYP1|A3AYP1_ORYSJ;tr|A0A0N7KJX8|A0A0N7KJX8_ORYSJ	18;18	tr|A3AYP1|A3AYP1_ORYSJ	tr|A3AYP1|A3AYP1_ORYSJ	>tr|A3AYP1|A3AYP1_ORYSJ Os04g0679400 protein OS=Oryza sativa subsp. japonica OX=39947 GN=Os04g0679400 PE=2 SV=1;>tr|A0A0N7KJX8|A0A0N7KJX8_ORYSJ Os04g0679400 protein OS=Oryza sativa subsp. japonica OX=39947 GN=Os04g0679400 PE=4 SV=1	1	4.22e-08	101.44	1	S	AIFQKQVAHAPAELNSPRSSAAKPKNPDEIL	X;X;X;X;X;X;X;X;X;X;X;X;X;X;X;Phospho (STY);X;X;X;X;X;X;X;X;X;X;X;X;X;X;X	XXXXXPPPPPPPPPPPPPXXXXXXXXXXXXX	QVAHAPAELNS(1)PR	11	3	-0.31274			13253;13254;13255;13256;13257;13258	13258	0.421658	0.524685	0.503079	1.09548	1.15675	1.09977	6.84459e-05	-0.634193	0.644301
A3AYP1	Os04g0679400	tr|A3AYP1|A3AYP1_ORYSJ;tr|A0A0P0WGG2|A0A0P0WGG2_ORYSJ	245;87	tr|A3AYP1|A3AYP1_ORYSJ	tr|A3AYP1|A3AYP1_ORYSJ	>tr|A3AYP1|A3AYP1_ORYSJ Os04g0679400 protein OS=Oryza sativa subsp. japonica OX=39947 GN=Os04g0679400 PE=2 SV=1;>tr|A0A0P0WGG2|A0A0P0WGG2_ORYSJ Os04g0679400 protein (Fragment) OS=Oryza sativa subsp. japonica OX=39947 GN=Os04g0679400 PE=4 SV=1	0.960561	5.88e-12	106.78	1	S	KVDTFTKINSMPRVGSATNWAATWDDAAA__	X;X;X;X;X;X;X;X;X;X;X;X;X;X;X;Phospho (STY);X;X;X;X;X;X;X;X;X;X;X;X;X;X;X	XXXXXXXXXXXXXPPPPPPPPPPPPPPPPXX	VGS(0.961)AT(0.039)NWAATWDDAAA	3	3	-0.91748			18367;18368;18369;18370;18371;18372;18373;18374;18375;18376;18377;18378;18379;18380;18381	18371	-0.616385	-0.440168	-0.684669	0.430263	0.371111	0.346643	0.000234476	-0.963079	0.512961
C7J287	Os05g0147500	tr|C7J287|C7J287_ORYSJ;tr|Q6ASR0|Q6ASR0_ORYSJ	93;93	tr|C7J287|C7J287_ORYSJ	tr|C7J287|C7J287_ORYSJ	>tr|C7J287|C7J287_ORYSJ Os05g0147500 protein OS=Oryza sativa subsp. japonica OX=39947 GN=Os05g0147500 PE=3 SV=1;>tr|Q6ASR0|Q6ASR0_ORYSJ Os05g0147500 protein OS=Oryza sativa subsp. japonica OX=39947 GN=Os05g0147500 PE=3 SV=1	0.981116	6.26e-09	63.774	1	S	RKDRGLAVDFKESQVSDFEDLEEDKFLNAVV	X;X;X;X;X;X;X;X;X;X;X;X;X;X;X;Phospho (STY);X;X;X;X;X;X;X;X;X;X;X;X;X;X;X	XXXXXXXXXXXPPPPPPPPPPPPPPPPPPPP	ES(0.019)QVS(0.981)DFEDLEEDKFLNAVVK	5	4	1.5611			4889;4890	4889	-2.60037	-2.45489	-2.91833	-1.68637	-1.60395	-1.67528	0.00197187	-1.00266	0.499078
Q0D6I0	Os07g0477500	tr|Q0D6I0|Q0D6I0_ORYSJ	330	tr|Q0D6I0|Q0D6I0_ORYSJ	tr|Q0D6I0|Q0D6I0_ORYSJ	>tr|Q0D6I0|Q0D6I0_ORYSJ Os07g0477500 protein OS=Oryza sativa subsp. japonica OX=39947 GN=Os07g0477500 PE=4 SV=1	0.990621	0.00456695	41.526	1	S	SVATEKENAILEKTASDGAVKSAEHENKTVE	X;X;X;X;X;X;X;X;X;X;X;X;X;X;X;Phospho (STY);X;X;X;X;X;X;X;X;X;X;X;X;X;X;X	XXXXXXXXXXXXXPPPPPPPPXXXXXXXXXX	T(0.009)AS(0.991)DGAVK	3	2	-2.1482			16550;16551;16552	16551	0.932225	0.61129	0.557633	1.54968	1.46671	1.40057	0.00345666	-0.771938	0.58563
Q0DK70	Os05g0188100	tr|Q0DK70|Q0DK70_ORYSJ	60	tr|Q0DK70|Q0DK70_ORYSJ	tr|Q0DK70|Q0DK70_ORYSJ	>tr|Q0DK70|Q0DK70_ORYSJ Os05g0188100 protein OS=Oryza sativa subsp. japonica OX=39947 GN=Os05g0188100 PE=2 SV=1	1	4.28e-26	138.53	1	S	WEGADGYADEDLDLISPKNSTSHSKSAASAA	X;X;X;X;X;X;X;X;X;X;X;X;X;X;X;Phospho (STY);X;X;X;X;X;X;X;X;X;X;X;X;X;X;X	PPPPPPPPPPPPPPPPPPXXXXXXXXXXXXX	FTWEGADGYADEDLDLIS(1)PK	18	2	0.41102			5778;5779;5780;5781;5782;5783;5784;5785;5786;5787	5781	0.0169919	0.00654464	0.0402163	0.69891	0.717686	0.759971	4.38174e-06	-0.704271	0.613752
Q0DRH6	Os03g0383800	tr|Q0DRH6|Q0DRH6_ORYSJ;tr|Q10KI0|Q10KI0_ORYSJ	78;505	tr|Q0DRH6|Q0DRH6_ORYSJ	tr|Q0DRH6|Q0DRH6_ORYSJ	>tr|Q0DRH6|Q0DRH6_ORYSJ Os03g0383800 protein (Fragment) OS=Oryza sativa subsp. japonica OX=39947 GN=Os03g0383800 PE=4 SV=1;>tr|Q10KI0|Q10KI0_ORYSJ Os03g0383800 protein OS=Oryza sativa subsp. japonica OX=39947 GN=LOC_Os03g26630 PE=4 SV=1	0.999966	1.31e-08	127.78	1	S	LKRSFGRSDSTASGDSPKERVVPPSQKPATA	X;X;X;X;X;X;X;X;X;X;X;X;X;X;X;Phospho (STY);X;X;X;X;X;X;X;X;X;X;X;X;X;X;X	XXXXXXXPPPPPPPPPPPPPXXXXXXXXXXX	SDSTASGDS(1)PKER	9	3	0.069272			14355;14356;14358;14359;14360	14360	0.188252	0.0697455	0.114971	0.903418	0.83765	0.922236	5.91672e-05	-0.763445	0.589088
Q10QG1	LOC_Os03g10140	tr|Q10QG1|Q10QG1_ORYSJ	497	tr|Q10QG1|Q10QG1_ORYSJ	tr|Q10QG1|Q10QG1_ORYSJ	>tr|Q10QG1|Q10QG1_ORYSJ Os03g0197800 protein OS=Oryza sativa subsp. japonica OX=39947 GN=LOC_Os03g10140 PE=4 SV=1	0.962552	2.54e-05	43.491	1	S	FSAKPATLDFLGLGVSPTGASTSRGFPTFIQ	X;X;X;X;X;X;X;X;X;X;X;X;X;X;X;Phospho (STY);X;X;X;X;X;X;X;X;X;X;X;X;X;X;X	XXXXPPPPPPPPPPPPPPPPPPPPXXXXXXX	PATLDFLGLGVS(0.963)PT(0.026)GAS(0.004)T(0.004)S(0.004)R	12	3	2.9637			12694	12694	-5.305	-4.67011	-4.84573	-4.36804	-4.48395	-4.20263	0.0461053	-0.588741	0.664923
Q2QT46	LOC_Os12g21890	tr|Q2QT46|Q2QT46_ORYSJ	121	tr|Q2QT46|Q2QT46_ORYSJ	tr|Q2QT46|Q2QT46_ORYSJ	>tr|Q2QT46|Q2QT46_ORYSJ Os12g0407500 protein OS=Oryza sativa subsp. japonica OX=39947 GN=LOC_Os12g21890 PE=2 SV=1	0.997635	0.000216584	53.796	2	S	KNTFSRLTSGLGLRLSPKGPQQDESAEGSTT	X;X;X;X;X;X;X;X;Phospho (STY);X;X;X;X;X;X;Phospho (STY);X;X;X;X;X;X;X;X;X;X;X;X;X;X;Phospho (STY)	XXXXXXPPPPPPPPPPPPXXXXXXXXXXXXX	LT(0.204)S(0.798)GLGLRLS(0.998)PK	10	3	0.094292			11133	11133	-2.28148	-2.12007	-2.05027	-1.38159	-1.43915	-1.48619	0.000671052	-0.714959	0.609222
Q5W6X0	Os05g0316800	tr|Q5W6X0|Q5W6X0_ORYSJ	23	tr|Q5W6X0|Q5W6X0_ORYSJ	tr|Q5W6X0|Q5W6X0_ORYSJ	>tr|Q5W6X0|Q5W6X0_ORYSJ Os05g0316800 protein OS=Oryza sativa subsp. japonica OX=39947 GN=Os05g0316800 PE=2 SV=1	1	0.0465555	29.263	1	S	PADSLAAGRSRRVGASMPRPKRVRVYFVDAD	X;X;X;X;X;X;X;X;X;X;X;X;X;X;X;Phospho (STY);X;X;X;X;X;X;X;X;X;X;X;X;X;X;X	XXXXXXXXXXXXPPPPPPPXXXXXXXXXXXX	VGAS(1)MPR	4	2	-3.0825			18283;18284	18284	0.395526	0.36331	0.416989	1.11577	1.18632	1.08067	2.94752e-05	-0.735642	0.600551
Q5ZDX7	Os01g0614700	tr|Q5ZDX7|Q5ZDX7_ORYSJ	221	tr|Q5ZDX7|Q5ZDX7_ORYSJ	tr|Q5ZDX7|Q5ZDX7_ORYSJ	>tr|Q5ZDX7|Q5ZDX7_ORYSJ Os01g0614700 protein OS=Oryza sativa subsp. japonica OX=39947 GN=Os01g0614700 PE=2 SV=1	0.999989	1.01e-21	106.01	2	S	SKEAPVSLKLPPPPPSPVSPTDSGIAASPFK	X;X;X;X;X;X;X;X;X;X;X;X;X;X;X;Phospho (STY);X;X;Phospho (STY);X;X;X;X;X;X;X;X;X;X;X;X	XXXXXXXXXPPPPPPPPPPPPPPPPPPPPPP	LPPPPPS(1)PVS(0.998)PT(0.002)DSGIAASPFK	7	3	0.4824			10731;10732;10733;10734;10735;10736;10737;10738;10739;10740;10741;10742;10743;10744;10745;10746;10747	10741	1.29913	1.34351	1.31709	2.02313	2.01878	2.08839	9.83337e-06	-0.723525	0.605616
Q6L561	Os05g0589600	tr|Q6L561|Q6L561_ORYSJ	300	tr|Q6L561|Q6L561_ORYSJ	tr|Q6L561|Q6L561_ORYSJ	>tr|Q6L561|Q6L561_ORYSJ Os05g0589600 protein OS=Oryza sativa subsp. japonica OX=39947 GN=Os05g0589600 PE=4 SV=1	1	0.00312705	49.222	1	S	LSVKKANEEVFIKLGSDKDLKKKEKDEKDER	X;X;X;X;X;X;X;X;X;X;X;X;X;X;X;Phospho (STY);X;X;X;X;X;X;X;X;X;X;X;X;X;X;X	XXXXXXXXXXXXXPPPPPPPPXXXXXXXXXX	LGS(1)DKDLK	3	2	-0.12659			10160;10161;10162;10163;10164;10165	10165	1.73159	1.71292	1.68258	2.81704	2.71189	2.78156	6.3003e-06	-1.06113	0.479256
Q6Z2V3	Os02g0743500	tr|Q6Z2V3|Q6Z2V3_ORYSJ	112	tr|Q6Z2V3|Q6Z2V3_ORYSJ	tr|Q6Z2V3|Q6Z2V3_ORYSJ	>tr|Q6Z2V3|Q6Z2V3_ORYSJ Os02g0743500 protein OS=Oryza sativa subsp. japonica OX=39947 GN=Os02g0743500 PE=4 SV=1	1	0.00573188	43.084	1	S	AERRRSQEEEWERRRSQEEEAVREMRRSQEE	X;X;X;X;X;X;X;X;X;X;X;X;X;X;X;Phospho (STY);X;X;X;X;X;X;X;X;X;X;X;X;X;X;X	XXXXXXXXXXXXXPPPPPPPPPPXXXXXXXX	RRS(1)QEEEAVR	3	3	0.28667			13773	13773	-5.72534	-5.29028	-5.54569	-4.16776	-4.45129	-4.84487	0.0114795	-1.03246	0.488875
Q75LR5	LOC_Os03g27260	tr|Q75LR5|Q75LR5_ORYSJ;tr|Q8LH97|Q8LH97_ORYSJ	231;231	tr|Q75LR5|Q75LR5_ORYSJ;tr|Q8LH97|Q8LH97_ORYSJ	tr|Q8LH97|Q8LH97_ORYSJ	>tr|Q75LR5|Q75LR5_ORYSJ 40S ribosomal protein S6 OS=Oryza sativa subsp. japonica OX=39947 GN=LOC_Os03g27260 PE=2 SV=1;>tr|Q8LH97|Q8LH97_ORYSJ 40S ribosomal protein S6 OS=Oryza sativa subsp. japonica OX=39947 GN=Os07g0622100 PE=2 SV=1	1	0.0029236	37.715	1;2	S	LLAQRLKEQRERRSESLAKRRSKLSAATTA_;LLAQRLKEQRERRSESLAKRRSKLSSAAKAA	X;X;X;X;X;X;X;X;X;X;X;X;X;Phospho (STY);X;Phospho (STY);X;X;X;X;X;Phospho (STY);X;X;Phospho (STY);Phospho (STY);X;Phospho (STY);X;X;X	XXXXXXXXXXPPPPPPPPPXXXXXXXXXXXX	ERRS(1)ES(1)LAK	6	3	-0.70029			4825;13800;13801;13802;13803;13804;13805;13806;13807;13808;13809	4825	3.24002	3.2412	3.20634	4.4219	4.32352	4.3717	3.07136e-06	-1.14319	0.452759
Q7XXS2	LOC_Os03g23010	tr|Q7XXS2|Q7XXS2_ORYSJ	120	tr|Q7XXS2|Q7XXS2_ORYSJ	tr|Q7XXS2|Q7XXS2_ORYSJ	>tr|Q7XXS2|Q7XXS2_ORYSJ 17.7 kDa low temperature induced protein OS=Oryza sativa subsp. japonica OX=39947 GN=LOC_Os03g23010 PE=2 SV=1	0.999978	0.00174091	73.176	1	S	AALKTDAVLKALSLVSPKGGDAPRGLREKPR	X;X;X;X;X;X;X;X;X;X;X;X;X;X;X;Phospho (STY);X;X;X;X;X;X;X;X;X;X;X;X;X;X;X	XXXXXXXXXXPPPPPPPPXXXXXXXXXXXXX	ALSLVS(1)PK	6	3	-0.016091			1226;1228;1229;1230;1231	1229	1.07346	1.09802	1.01705	2.34517	2.33344	2.31323	1.01354e-06	-1.26777	0.415301
Q8GTK4	Os07g0141400	tr|Q8GTK4|Q8GTK4_ORYSJ	173	tr|Q8GTK4|Q8GTK4_ORYSJ	tr|Q8GTK4|Q8GTK4_ORYSJ	>tr|Q8GTK4|Q8GTK4_ORYSJ Os07g0141400 protein OS=Oryza sativa subsp. japonica OX=39947 GN=Os07g0141400 PE=2 SV=1	0.998725	2.06e-22	98.803	1	S	KQAYSGKTDSEGGFESDAVATANILESSAPV	X;X;X;X;X;X;X;X;X;X;X;X;X;X;X;Phospho (STY);X;X;X;X;X;X;X;X;X;X;X;X;X;X;X	XXXXXXXPPPPPPPPPPPPPPPPPPPPPPPP	T(0.001)DS(0.001)EGGFES(0.999)DAVATANILESSAPVVGGK	9	4	-0.18433			16651;16652;16653	16653	-2.25273	-2.01965	-2.17005	-1.51373	-1.4437	-1.4946	0.000744277	-0.663468	0.631359
Q8H4V1	Os08g0366000	tr|Q8H4V1|Q8H4V1_ORYSJ	10	tr|Q8H4V1|Q8H4V1_ORYSJ	tr|Q8H4V1|Q8H4V1_ORYSJ	>tr|Q8H4V1|Q8H4V1_ORYSJ Phosphoenolpyruvate carboxylase OS=Oryza sativa subsp. japonica OX=39947 GN=Os08g0366000 PE=2 SV=1	1	5.68e-08	81.436	1	S	______MAGKVEKMASIDAQLRMLAPAKLSE	X;X;X;X;X;X;X;X;X;X;X;X;X;Oxidation (M);X;Phospho (STY);X;X;X;X;X;X;X;X;X;X;X;X;X;X;X	XXXXXXXXXXXXXPPPPPPPPPXXXXXXXXX	MAS(1)IDAQLR	3	2	-0.14752			11442;11443;11444;11445;11446;11447;11448	11448	0.370313	0.344412	0.265093	1.51949	1.61947	1.52824	1.06716e-05	-1.22913	0.426575
Q8H5M0	Os07g0585000	tr|Q8H5M0|Q8H5M0_ORYSJ	434	tr|Q8H5M0|Q8H5M0_ORYSJ	tr|Q8H5M0|Q8H5M0_ORYSJ	>tr|Q8H5M0|Q8H5M0_ORYSJ Os07g0585000 protein OS=Oryza sativa subsp. japonica OX=39947 GN=Os07g0585000 PE=2 SV=1	1	0.000496265	47.669	1	S	AAAAAKKPMAGGPEKSPKVFYGSRAFF____	X;X;X;X;X;X;X;X;X;X;X;X;X;X;X;Phospho (STY);X;X;X;X;X;X;X;X;X;X;X;X;X;X;X	XXXXXXPPPPPPPPPPPPXXXXXXXXXXXXX	KPMAGGPEKS(1)PK	10	4	-0.70587			9325;9326	9326	0.688815	0.652465	0.754486	1.48455	1.33806	1.44612	0.000166628	-0.724322	0.605281
Q8LH97	Os07g0622100	tr|Q8LH97|Q8LH97_ORYSJ	237	tr|Q8LH97|Q8LH97_ORYSJ	tr|Q8LH97|Q8LH97_ORYSJ	>tr|Q8LH97|Q8LH97_ORYSJ 40S ribosomal protein S6 OS=Oryza sativa subsp. japonica OX=39947 GN=Os07g0622100 PE=2 SV=1	0.999983	0.00195961	55.133	1;2	S	KEQRERRSESLAKRRSKLSSAAKAAATTA__	X;X;X;X;X;X;X;Phospho (STY);X;Phospho (STY);X;X;X;X;X;Phospho (STY);X;X;Phospho (STY);X;X;X;X;X;X;X;X;X;X;X;X	XXXXXXXXXXXXXXXPPPPPPPPXXXXXXXX	S(1)KLS(0.951)S(0.049)AAK	1	3	-0.24584			15008;15014;15015;15016;15017;15018;15019;15020	15017	2.33926	2.31759	2.65357	3.50612	3.79373	3.43589	0.00177346	-1.14178	0.453201
Q8LH97	Os07g0622100	tr|Q8LH97|Q8LH97_ORYSJ	240	tr|Q8LH97|Q8LH97_ORYSJ	tr|Q8LH97|Q8LH97_ORYSJ	>tr|Q8LH97|Q8LH97_ORYSJ 40S ribosomal protein S6 OS=Oryza sativa subsp. japonica OX=39947 GN=Os07g0622100 PE=2 SV=1	0.951491	0.00195961	47.135	1;2	S	RERRSESLAKRRSKLSSAAKAAATTA_____	X;X;X;X;Phospho (STY);X;Phospho (STY);X;X;X;X;X;Phospho (STY);X;X;Phospho (STY);X;X;X;X;X;X;X;X;X;X;X;X;X;X;X	XXXXXXXXXXXXPPPPPPPPXXXXXXXXXXX	S(1)KLS(0.951)S(0.049)AAK	4	3	-0.24584			15006;15009;15010;15011;15012;15013;15015;15016;15017;15018;15019;15020	15017	3.09447	3.0902	3.23529	4.35496	4.47263	4.27754	7.75005e-05	-1.22839	0.426793
Q9LHU2	Os01g0222600	tr|Q9LHU2|Q9LHU2_ORYSJ	36	tr|Q9LHU2|Q9LHU2_ORYSJ	tr|Q9LHU2|Q9LHU2_ORYSJ	>tr|Q9LHU2|Q9LHU2_ORYSJ Os01g0222600 protein OS=Oryza sativa subsp. japonica OX=39947 GN=Os01g0222600 PE=2 SV=1	0.806494	4.48e-21	102.01	1	S	AAAVDAVKAANKEPISPGSPSLASGAGKESL	X;X;X;X;X;X;X;X;X;X;X;X;X;X;X;Phospho (STY);X;X;X;X;X;X;X;X;X;X;X;X;X;X;X	XXXXXXXXPPPPPPPPPPPPPPPPPPPPXXX	AANKEPIS(0.806)PGS(0.191)PS(0.002)LASGAGK	8	3	-0.070193			230;231	230	-0.981082	-0.695703	-0.85057	0.279436	0.318339	0.278746	0.000169916	-1.13463	0.455453
A0A0P0X4N7	Os07g0243150	tr|A0A0P0X4N7|A0A0P0X4N7_ORYSJ	74	tr|A0A0P0X4N7|A0A0P0X4N7_ORYSJ	tr|A0A0P0X4N7|A0A0P0X4N7_ORYSJ	>tr|A0A0P0X4N7|A0A0P0X4N7_ORYSJ Os07g0243150 protein (Fragment) OS=Oryza sativa subsp. japonica OX=39947 GN=Os07g0243150 PE=4 SV=1	0.991758	0.000961635	53.451	1	T	LNKVEEKAPAAASRATKASGAPAKKAAGDGD	X;X;X;X;X;X;X;X;X;X;X;X;X;X;X;Phospho (STY);X;X;X;X;X;X;X;X;X;X;X;X;X;X;X	XXXXXXXXXXXXXXPPPPPPPPPPXXXXXXX	AT(0.992)KAS(0.008)GAPAK	2	3	0.093655			2024;2025;2026	2025	1.46655	1.41178	1.45564	2.42907	2.31949	2.32874	1.93616e-05	-0.914441	0.530549
A0A0P0X4N7	Os07g0243150	tr|A0A0P0X4N7|A0A0P0X4N7_ORYSJ	28	tr|A0A0P0X4N7|A0A0P0X4N7_ORYSJ	tr|A0A0P0X4N7|A0A0P0X4N7_ORYSJ	>tr|A0A0P0X4N7|A0A0P0X4N7_ORYSJ Os07g0243150 protein (Fragment) OS=Oryza sativa subsp. japonica OX=39947 GN=Os07g0243150 PE=4 SV=1	0.982878	2.44e-05	112.95	1	T	PPSARVARPSATKSVTAAAATEEKGLFDAIF	X;X;X;X;X;X;X;X;X;X;X;X;X;X;X;Phospho (STY);X;X;X;X;X;X;X;X;X;X;X;X;X;X;X	XXXXXXXXXXXXXPPPPPPPPPPPXXXXXXX	S(0.017)VT(0.983)AAAATEEK	3	3	-1.0606			16292;16293;16294;16295;16296;16297;16298;16299;16300;16301;16302	16295	2.07544	2.05514	2.00558	2.79115	2.71585	2.7555	1.9174e-05	-0.708782	0.611836
Q75LR5	LOC_Os03g27260	tr|Q75LR5|Q75LR5_ORYSJ	243	tr|Q75LR5|Q75LR5_ORYSJ	tr|Q75LR5|Q75LR5_ORYSJ	>tr|Q75LR5|Q75LR5_ORYSJ 40S ribosomal protein S6 OS=Oryza sativa subsp. japonica OX=39947 GN=LOC_Os03g27260 PE=2 SV=1	0.847101	0.00531618	51.006	1	T	RSESLAKRRSKLSAATTA_____________	X;Phospho (STY);X;Phospho (STY);X;X;X;X;X;X;X;X;X;X;X;Phospho (STY);X;X;X;X;X;X;X;X;X;X;X;X;X;X;X	XXXXXXXXXPPPPPPPPPXXXXXXXXXXXXX	SKLS(0.004)AAT(0.847)T(0.148)A	7	2	-0.33282			15002;15003;15005	15002	0.830282	0.737363	0.819345	1.81849	1.69592	1.7446	3.189e-05	-0.95734	0.515006
A3C4S4	GME-1	sp|A3C4S4|GME1_ORYSJ	356	sp|A3C4S4|GME1_ORYSJ	sp|A3C4S4|GME1_ORYSJ	>sp|A3C4S4|GME1_ORYSJ GDP-mannose 3,5-epimerase 1 OS=Oryza sativa subsp. japonica OX=39947 GN=GME-1 PE=1 SV=1	0.929615	6e-05	61.757	1	S	IEKEKTQGVDIAGYGSSKVVSTQAPVQLGSL	X;X;X;X;X;X;X;X;X;X;X;X;X;X;X;Phospho (STY);X;X;X;X;X;X;X;X;X;X;X;X;X;Phospho (STY);X	XXXXXPPPPPPPPPPPPPXXXXXXXXXXXXX	TQGVDIAGYGS(0.93)S(0.07)K	11	2	-1.2341			17318	17318	-1.14164	-0.922849	-0.955598	-1.95437	-2.14407	-2.19079	0.000392308	1.08972	2.12832
Q53JF7	ASR5	sp|Q53JF7|ASR5_ORYSJ	128	sp|Q53JF7|ASR5_ORYSJ	sp|Q53JF7|ASR5_ORYSJ	>sp|Q53JF7|ASR5_ORYSJ Abscisic stress-ripening protein 5 OS=Oryza sativa subsp. japonica OX=39947 GN=ASR5 PE=1 SV=1	0.919491	1.04e-07	89.3	1	S	HEHHEKKKDHKSAEESTGEKKHHLFG_____	X;X;X;X;X;X;X;X;X;X;X;X;X;X;X;Phospho (STY);X;X;X;X;X;X;X;X;X;X;X;X;X;X;X	XXXXXXXXXXXPPPPPPPPPXXXXXXXXXXX	SAEES(0.919)T(0.081)GEK	5	2	0.32084			14031;14033;14035	14031	0.912971	0.974583	0.948318	0.141689	0.109518	0.0374987	1.83291e-05	0.849055	1.80132
Q5JN42	PSD2	sp|Q5JN42|PSD2_ORYSJ	56	sp|Q5JN42|PSD2_ORYSJ	sp|Q5JN42|PSD2_ORYSJ	>sp|Q5JN42|PSD2_ORYSJ Phosphatidylserine decarboxylase proenzyme 2 OS=Oryza sativa subsp. japonica OX=39947 GN=PSD2 PE=3 SV=3	0.97846	2.86e-15	100.72	1	S	RDRAGRPGGDAHASESGTGRAIAVDEFAGIA	X;X;X;X;X;X;X;X;X;X;X;X;X;X;X;Phospho (STY);X;X;X;X;X;X;X;X;X;X;X;X;X;X;X	XXXPPPPPPPPPPPPPPPPPXXXXXXXXXXX	AGRPGGDAHAS(0.006)ES(0.978)GT(0.015)GR	13	3	0.23988			794;795;796;797	794	-0.989961	-1.1155	-0.996278	-1.72029	-1.56002	-1.59905	0.000721428	0.592539	1.5079
Q651D5	PIP2-7	sp|Q651D5|PIP27_ORYSJ	282	sp|Q651D5|PIP27_ORYSJ	sp|Q651D5|PIP27_ORYSJ	>sp|Q651D5|PIP27_ORYSJ Probable aquaporin PIP2-7 OS=Oryza sativa subsp. japonica OX=39947 GN=PIP2-7 PE=2 SV=2	0.892322	5.96e-05	68.29	2	S	YHKLVLRGEAAKALSSFRSTSVTA_______	X;X;X;X;X;X;X;X;X;X;X;X;X;X;X;Phospho (STY);X;X;Phospho (STY);Phospho (STY);Phospho (STY);X;X;X;X;X;X;X;X;X;X	XXXXXXXXXXXXPPPPPPPPPPPPXXXXXXX	ALS(0.101)S(0.892)FRS(0.081)T(0.424)S(0.187)VT(0.315)A	4	2	-1.1318			1247;1248;1249;1250;1251;1252	1252	1.40216	1.38722	1.30389	0.540436	0.69435	0.661011	0.00019527	0.732491	1.6615
Q651D5	PIP2-7	sp|Q651D5|PIP27_ORYSJ	285	sp|Q651D5|PIP27_ORYSJ	sp|Q651D5|PIP27_ORYSJ	>sp|Q651D5|PIP27_ORYSJ Probable aquaporin PIP2-7 OS=Oryza sativa subsp. japonica OX=39947 GN=PIP2-7 PE=2 SV=2	0.827705	7.43e-06	79.614	1	S	LVLRGEAAKALSSFRSTSVTA__________	X;X;X;X;X;X;X;X;X;X;X;X;Phospho (STY);X;X;Phospho (STY);X;X;X;X;X;X;X;X;X;X;X;X;X;X;X	XXXXXXXXXPPPPPPPPPPPPXXXXXXXXXX	ALSS(0.003)FRS(0.828)T(0.149)S(0.016)VT(0.004)A	7	2	0.56226			1242;1243;1244;1245;1246	1242	1.31501	1.42198	1.42209	0.721851	0.702323	0.67891	5.42543e-05	0.685333	1.60807
Q6ATB2	CRSH2	sp|Q6ATB2|CRSH2_ORYSJ	553	sp|Q6ATB2|CRSH2_ORYSJ	sp|Q6ATB2|CRSH2_ORYSJ	>sp|Q6ATB2|CRSH2_ORYSJ Probable GTP diphosphokinase CRSH2, chloroplastic OS=Oryza sativa subsp. japonica OX=39947 GN=CRSH2 PE=2 SV=1	0.915832	0.00427535	62.314	1	S	KVDDTGLIHVYRKNLSDKLVSG_________	X;X;X;X;X;X;X;X;X;X;X;X;X;X;X;Phospho (STY);X;X;X;X;X;X;X;X;X;X;X;X;X;X;X	XXXXXXXXXXXXPPPPPPPPPPXXXXXXXXX	KNLS(0.916)DKLVS(0.084)G	4	2	1.5799			9261	9261	-0.302851	-0.289716	-0.273921	-1.42321	-1.47653	-1.45913	3.26452e-07	1.16412	2.24097
Q6ATB2	CRSH2	sp|Q6ATB2|CRSH2_ORYSJ	558	sp|Q6ATB2|CRSH2_ORYSJ	sp|Q6ATB2|CRSH2_ORYSJ	>sp|Q6ATB2|CRSH2_ORYSJ Probable GTP diphosphokinase CRSH2, chloroplastic OS=Oryza sativa subsp. japonica OX=39947 GN=CRSH2 PE=2 SV=1	0.999647	0.00190709	58.493	1	S	GLIHVYRKNLSDKLVSG______________	X;X;X;X;X;X;X;X;X;X;X;X;X;X;X;Phospho (STY);X;X;X;X;X;X;X;X;X;X;X;X;X;X;X	XXXXXXXPPPPPPPPPPXXXXXXXXXXXXXX	NLSDKLVS(1)G	8	2	0.071335			9257;9258;9259;9260;9262;12240;12241;12242;12243;12244;12245	12243	3.68811	3.65107	3.67045	2.76063	2.64883	2.74498	1.2923e-05	0.951735	1.9342
Q6ATB2	CRSH2	sp|Q6ATB2|CRSH2_ORYSJ	36	sp|Q6ATB2|CRSH2_ORYSJ	sp|Q6ATB2|CRSH2_ORYSJ	>sp|Q6ATB2|CRSH2_ORYSJ Probable GTP diphosphokinase CRSH2, chloroplastic OS=Oryza sativa subsp. japonica OX=39947 GN=CRSH2 PE=2 SV=1	0.999998	0.00110046	80.603	1	S	DVEHHAPAPRLTPAGSGGRLMAELLGVFNGL	X;X;X;X;X;X;X;X;X;X;X;X;X;X;X;Phospho (STY);X;X;X;X;X;X;X;X;X;X;X;X;X;X;X	XXXXXXXXXXPPPPPPPPPXXXXXXXXXXXX	LTPAGS(1)GGR	6	2	0.30973			11103;11104;11105;11106	11103	1.43112	1.39423	1.39603	0.629387	0.458284	0.606156	0.000105277	0.842518	1.79318
Q7XWP1	Os04g0252200	sp|Q7XWP1|CPSF1_ORYSJ	477	sp|Q7XWP1|CPSF1_ORYSJ	sp|Q7XWP1|CPSF1_ORYSJ	>sp|Q7XWP1|CPSF1_ORYSJ Probable cleavage and polyadenylation specificity factor subunit 1 OS=Oryza sativa subsp. japonica OX=39947 GN=Os04g0252200 PE=3 SV=2	0.98626	1.67e-08	59.117	1	S	IEGDLPFSKRLKRIPSDVLQDVTSVEELSFQ	X;X;X;X;X;X;X;X;X;X;X;X;X;X;X;Phospho (STY);X;X;X;X;X;X;X;X;X;X;X;X;X;X;X	XXXXXXXXXXXXPPPPPPPPPPPPPPPPPPP	RIPS(0.986)DVLQDVT(0.007)S(0.007)VEELS(0.001)FQNIIAPNSLESAQK	4	4	-0.079942			13536;13537;13538	13536	-3.86853	-3.40655	-3.6669	-4.20809	-4.24296	-4.44424	0.0129932	0.651104	1.57037
A0A0N7KLY1	Os06g0286351	tr|A0A0N7KLY1|A0A0N7KLY1_ORYSJ;tr|Q5VMT5|Q5VMT5_ORYSJ	1063;1545	tr|A0A0N7KLY1|A0A0N7KLY1_ORYSJ	tr|A0A0N7KLY1|A0A0N7KLY1_ORYSJ	>tr|A0A0N7KLY1|A0A0N7KLY1_ORYSJ Os06g0286351 protein OS=Oryza sativa subsp. japonica OX=39947 GN=Os06g0286351 PE=4 SV=1;>tr|Q5VMT5|Q5VMT5_ORYSJ Os06g0286351 protein OS=Oryza sativa subsp. japonica OX=39947 GN=Os06g0286351 PE=2 SV=1	0.999887	1.84e-05	60.007	1	S	KEEEPDDHNLNSKEESDNETLSVWKKRTAKA	X;X;X;X;X;X;X;X;X;X;X;X;X;X;X;Phospho (STY);X;X;X;X;X;X;X;X;X;X;X;X;X;X;X	XXXXXXXXXXXXXPPPPPPPPPPPPXXXXXX	EES(1)DNETLSVWK	3	3	0.63191			3906	3906	-2.04466	-2.54696	-2.35235	-2.86492	-3.00648	-2.8775	0.0170918	0.601643	1.51744
A0A0P0VM23	Os02g0615800	tr|A0A0P0VM23|A0A0P0VM23_ORYSJ;tr|Q6K7X0|Q6K7X0_ORYSJ	475;853	tr|A0A0P0VM23|A0A0P0VM23_ORYSJ	tr|A0A0P0VM23|A0A0P0VM23_ORYSJ	>tr|A0A0P0VM23|A0A0P0VM23_ORYSJ Os02g0615800 protein (Fragment) OS=Oryza sativa subsp. japonica OX=39947 GN=Os02g0615800 PE=4 SV=1;>tr|Q6K7X0|Q6K7X0_ORYSJ Os02g0615800 protein OS=Oryza sativa subsp. japonica OX=39947 GN=Os02g0615800 PE=4 SV=1	0.807785	1.82e-17	102.38	1	S	ARFYIDSWSTSTGSNSTVGVKGTIGYIPPEY	X;X;X;X;X;X;X;X;X;X;X;X;X;X;X;Phospho (STY);X;X;X;X;X;X;X;X;X;X;X;X;X;X;X	XXPPPPPPPPPPPPPPPPPPPXXXXXXXXXX	FYIDSWSTS(0.005)T(0.005)GS(0.003)NS(0.808)T(0.18)VGVK	14	3	-0.84962			5848;5851	5848	-1.43349	-1.40521	-1.43462	-2.11466	-2.23215	-2.49429	0.00160824	0.855926	1.80992
A0A0P0W3S2	Os03g0777700	tr|A0A0P0W3S2|A0A0P0W3S2_ORYSJ	83	tr|A0A0P0W3S2|A0A0P0W3S2_ORYSJ	tr|A0A0P0W3S2|A0A0P0W3S2_ORYSJ	>tr|A0A0P0W3S2|A0A0P0W3S2_ORYSJ Protein FAR1-RELATED SEQUENCE (Fragment) OS=Oryza sativa subsp. japonica OX=39947 GN=Os03g0777700 PE=3 SV=1	0.986223	0.0189164	14.127	1	S	KSRAYVCSKEGFRSKSVSTDPKKPRPETRTG	X;X;X;X;X;X;X;X;X;X;X;X;X;X;X;Phospho (STY);X;X;X;X;X;X;X;X;X;X;X;X;X;X;X	XXXXXXXXXXXXXXXPPPPPPPPXXXXXXXX	S(0.986)VS(0.007)T(0.007)DPKK	1	3	0.094456			16280	16280	0.215265	0.176228	0.163622	-0.533381	-0.405139	-0.339268	0.000493243	0.610967	1.52728
A0A0P0WAD7	Os04g0423600	tr|A0A0P0WAD7|A0A0P0WAD7_ORYSJ	106	tr|A0A0P0WAD7|A0A0P0WAD7_ORYSJ	tr|A0A0P0WAD7|A0A0P0WAD7_ORYSJ	>tr|A0A0P0WAD7|A0A0P0WAD7_ORYSJ Os04g0423600 protein OS=Oryza sativa subsp. japonica OX=39947 GN=Os04g0423600 PE=3 SV=1	0.838287	1.39e-11	137.57	1	S	SGGGGYNKSGADDYSSSGGYSKSGTDNYSGS	Phospho (STY);X;X;X;X;X;X;X;X;X;X;X;X;X;X;Phospho (STY);X;X;X;X;X;X;X;X;X;X;X;X;Phospho (STY);X;Phospho (STY)	XXXXXXXXPPPPPPPPPPPPPPXXXXXXXXX	SGADDYS(0.094)S(0.838)S(0.068)GGYSK	8	2	0.088084			14595	14595	-0.503598	-0.535482	-0.542345	-1.33903	-1.35296	-1.31245	1.13152e-06	0.807669	1.75038
A0A0P0WAD7	Os04g0423600	tr|A0A0P0WAD7|A0A0P0WAD7_ORYSJ	121	tr|A0A0P0WAD7|A0A0P0WAD7_ORYSJ	tr|A0A0P0WAD7|A0A0P0WAD7_ORYSJ	>tr|A0A0P0WAD7|A0A0P0WAD7_ORYSJ Os04g0423600 protein OS=Oryza sativa subsp. japonica OX=39947 GN=Os04g0423600 PE=3 SV=1	0.799993	9.69e-11	80.041	1	S	SSGGYSKSGTDNYSGSGGYNKSGNNDYSGSG	Phospho (STY);X;X;X;X;X;X;X;X;X;X;X;X;X;X;Phospho (STY);X;X;X;X;X;X;X;X;X;X;X;X;X;X;X	XXXXXXXPPPPPPPPPPPPPPXXXXXXXXXX	SGT(0.006)DNYS(0.194)GS(0.8)GGYNK	9	2	0.0078907			14873	14873	-0.0210661	0.0574777	-0.0869501	-0.705536	-0.804071	-0.793991	0.000135401	0.75102	1.68298
A0A0P0WK78	Os05g0270200	tr|A0A0P0WK78|A0A0P0WK78_ORYSJ	84	tr|A0A0P0WK78|A0A0P0WK78_ORYSJ	tr|A0A0P0WK78|A0A0P0WK78_ORYSJ	>tr|A0A0P0WK78|A0A0P0WK78_ORYSJ Os05g0270200 protein (Fragment) OS=Oryza sativa subsp. japonica OX=39947 GN=Os05g0270200 PE=4 SV=1	1	0.0125	15.939	1	S	KITDKKDLSHTIRGESVLGKSKYPLEARKDA	X;X;X;X;X;X;X;X;X;X;X;X;X;X;X;Phospho (STY);X;X;X;X;X;X;X;X;X;X;X;X;X;X;X	XXXXXXXXXXXXXPPPPPPPXXXXXXXXXXX	GES(1)VLGK	3	2	-0.59566			6217	6217	1.01942	1.00005	1.06906	0.313529	0.212863	0.273024	2.84682e-05	0.763039	1.69706
A0A0P0X2K2	Os07g0137900	tr|A0A0P0X2K2|A0A0P0X2K2_ORYSJ	550	tr|A0A0P0X2K2|A0A0P0X2K2_ORYSJ	tr|A0A0P0X2K2|A0A0P0X2K2_ORYSJ	>tr|A0A0P0X2K2|A0A0P0X2K2_ORYSJ Os07g0137900 protein (Fragment) OS=Oryza sativa subsp. japonica OX=39947 GN=Os07g0137900 PE=4 SV=1	0.983143	3.78e-05	72.917	1	S	KQSEFPTLSSQTRSSSIKDQSPMNRQKSQAS	X;X;X;X;X;X;X;X;X;X;X;X;X;X;X;Phospho (STY);X;X;X;X;X;X;X;X;X;X;X;X;X;X;X	XXXXXXXXXXXXXPPPPPPPPPPPPXXXXXX	S(0.001)S(0.013)S(0.983)IKDQS(0.002)PMNR	3	3	-1.9306			15903	15903	0.199241	0.278341	0.210173	-0.501087	-0.38589	-0.410204	0.00010324	0.661645	1.58189
A0A0P0YCQ1	Os12g0639800	tr|A0A0P0YCQ1|A0A0P0YCQ1_ORYSJ;tr|Q84SZ1|Q84SZ1_ORYSJ;tr|Q69WS1|Q69WS1_ORYSJ	139;139;139	tr|A0A0P0YCQ1|A0A0P0YCQ1_ORYSJ	tr|A0A0P0YCQ1|A0A0P0YCQ1_ORYSJ	>tr|A0A0P0YCQ1|A0A0P0YCQ1_ORYSJ Os12g0639800 protein OS=Oryza sativa subsp. japonica OX=39947 GN=Os12g0639800 PE=3 SV=1;>tr|Q84SZ1|Q84SZ1_ORYSJ Os03g0803000 protein OS=Oryza sativa subsp. japonica OX=39947 GN=LOC_Os03g58840 PE=3 SV=1;>tr|Q69WS1|Q69WS1_ORYS	1	0.0117843	15.164	1	S	HPEEVSKLAKVKAQVSEVKGIMMENIDKAID	X;X;X;X;X;X;X;X;X;X;X;X;X;X;X;Phospho (STY);X;X;X;X;X;X;X;X;X;X;X;X;X;X;X	XXXXXXXXXXXXPPPPPPPXXXXXXXXXXXX	AQVS(1)EVK	4	2	1.7507			1654;1655;1656	1656	1.66034	1.63459	1.69616	0.912884	0.977611	0.893935	1.86841e-05	0.735552	1.66503
B7E741	Os05g0589000	tr|B7E741|B7E741_ORYSJ	90	tr|B7E741|B7E741_ORYSJ	tr|B7E741|B7E741_ORYSJ	>tr|B7E741|B7E741_ORYSJ Os05g0589000 protein OS=Oryza sativa subsp. japonica OX=39947 GN=Os05g0589000 PE=2 SV=1	0.986111	0.000297726	152.88	1	S	STGSTQPSGPEVRSSSFSSSENVRARSSGSS	X;X;X;X;X;X;X;X;X;X;X;X;X;X;X;Phospho (STY);X;X;X;X;X;X;X;X;X;X;X;X;X;X;X	XXXXXXXXXXXXXPPPPPPPPPPPXXXXXXX	S(0.001)S(0.006)S(0.986)FS(0.006)S(0.001)SENVR	3	2	-0.29033			15871;15872;15873	15873	1.38559	1.32748	1.43531	0.733981	0.745466	0.6371	0.000128028	0.67728	1.59912
B7FAA5	Os04g0480100	tr|B7FAA5|B7FAA5_ORYSJ	516	tr|B7FAA5|B7FAA5_ORYSJ	tr|B7FAA5|B7FAA5_ORYSJ	>tr|B7FAA5|B7FAA5_ORYSJ Os04g0480100 protein OS=Oryza sativa subsp. japonica OX=39947 GN=Os04g0480100 PE=2 SV=1	0.999991	0.00045053	58.544	1	S	PAEERWGFQGSRERGSFGGSRSSDRPMTRQR	X;X;X;X;X;X;X;X;X;X;X;X;X;X;X;Phospho (STY);X;X;X;X;X;X;X;X;X;X;X;X;X;X;X	XXXXXXXXXXXXPPPPPPPPPXXXXXXXXXX	ERGS(1)FGGSR	4	2	-0.013915			4789;4790;4791;4792;4793	4789	0.842277	0.727253	0.802835	0.0523315	0.11736	0.125201	7.12901e-05	0.692491	1.61607
B7FAA5	Os04g0480100	tr|B7FAA5|B7FAA5_ORYSJ	212	tr|B7FAA5|B7FAA5_ORYSJ	tr|B7FAA5|B7FAA5_ORYSJ	>tr|B7FAA5|B7FAA5_ORYSJ Os04g0480100 protein OS=Oryza sativa subsp. japonica OX=39947 GN=Os04g0480100 PE=2 SV=1	0.99861	2.16e-12	133.07	1	S	DDWSRDKKPMPSRYPSLGSGGGGGGGFRESP	X;X;X;X;X;X;X;X;X;X;X;X;X;X;X;Phospho (STY);X;X;X;X;X;X;X;X;X;X;X;X;X;X;X	XXXXXXXXXXXXXPPPPPPPPPPPPPPPXXX	YPS(0.999)LGS(0.001)GGGGGGGFR	3	2	0.413			20005;20006;20007;20008;20009;20010	20005	1.97942	1.97835	1.9724	1.31875	1.2262	1.20038	3.52508e-05	0.728275	1.65666
Q75IQ9	Os05g0164100	tr|Q75IQ9|Q75IQ9_ORYSJ;tr|Q0DKG9|Q0DKG9_ORYSJ	284;284	tr|Q75IQ9|Q75IQ9_ORYSJ	tr|Q75IQ9|Q75IQ9_ORYSJ	>tr|Q75IQ9|Q75IQ9_ORYSJ Os05g0164100 protein OS=Oryza sativa subsp. japonica OX=39947 GN=Os05g0164100 PE=4 SV=1;>tr|Q0DKG9|Q0DKG9_ORYSJ Os05g0164100 protein OS=Oryza sativa subsp. japonica OX=39947 GN=Os05g0164100 PE=4 SV=1	0.82224	2.41e-05	65.116	1	S	DHNNCNKDNVALPSDSFKKLQVSGIVESKSV	X;X;X;X;X;X;X;X;X;X;X;X;X;X;X;Phospho (STY);X;X;X;X;X;X;X;X;X;X;X;X;X;Phospho (STY);X	XXXXXXXPPPPPPPPPPPPXXXXXXXXXXXX	DNVALPS(0.178)DS(0.822)FKK	9	3	-0.32377			3240;3243	3243	2.37927	2.3916	2.42493	1.83515	1.68801	1.73776	0.000141492	0.644958	1.56369
Q0DMP3	Os03g0800000	tr|Q0DMP3|Q0DMP3_ORYSJ;tr|Q851R0|Q851R0_ORYSJ	390;625	tr|Q0DMP3|Q0DMP3_ORYSJ	tr|Q0DMP3|Q0DMP3_ORYSJ	>tr|Q0DMP3|Q0DMP3_ORYSJ Os03g0800000 protein (Fragment) OS=Oryza sativa subsp. japonica OX=39947 GN=Os03g0800000 PE=4 SV=1;>tr|Q851R0|Q851R0_ORYSJ Nodulin family protein, putative, expressed OS=Oryza sativa subsp. japonica OX=39947 GN=LOC_Os03g58580 PE=4 S	0.999996	1.02e-07	90.294	1	S	DTAAEKRSTLVNDEDSKKG____________	X;X;X;X;X;X;X;X;X;X;X;X;X;X;X;Phospho (STY);X;X;X;X;X;X;X;X;X;X;X;X;X;X;X	XXXXXXXPPPPPPPPPPPPXXXXXXXXXXXX	STLVNDEDS(1)KKG	9	3	-2.243			16071;16072;16073	16071	3.07324	3.09451	3.15032	1.69176	1.63444	1.61376	1.51672e-06	1.45937	2.74989
Q0IZR7	Os09g0553900	tr|Q0IZR7|Q0IZR7_ORYSJ	135	tr|Q0IZR7|Q0IZR7_ORYSJ	tr|Q0IZR7|Q0IZR7_ORYSJ	>tr|Q0IZR7|Q0IZR7_ORYSJ Os09g0553900 protein OS=Oryza sativa subsp. japonica OX=39947 GN=Os09g0553900 PE=2 SV=1	1	0.00452099	31.956	1	S	GEKKGIWGWKPIRALSHIGMNRLGCLFSVEV	X;X;X;X;X;X;X;X;X;X;X;X;X;X;X;Phospho (STY);X;X;X;X;X;X;X;X;X;X;X;X;X;X;X	XXXXXXXXXXXXXPPPPPPPPPXXXXXXXXX	ALS(1)HIGMNR	3	2	-1.8678			1224;1225	1225	0.956883	0.974026	0.927261	0.324126	0.291818	0.265726	7.03949e-06	0.658833	1.57881
Q0JDB4	Os04g0415200	tr|Q0JDB4|Q0JDB4_ORYSJ	157	tr|Q0JDB4|Q0JDB4_ORYSJ	tr|Q0JDB4|Q0JDB4_ORYSJ	>tr|Q0JDB4|Q0JDB4_ORYSJ HVA22-like protein OS=Oryza sativa subsp. japonica OX=39947 GN=Os04g0415200 PE=2 SV=1	1	0.00225656	96.147	1	S	IRSQTSRGSRTRRWFSFGGDRAERSSYVDDY	X;X;X;X;X;X;X;X;X;X;X;X;X;X;X;Phospho (STY);X;X;X;X;X;X;X;X;X;X;X;X;X;X;X	XXXXXXXXXXXXXPPPPPPPPXXXXXXXXXX	WFS(1)FGGDR	3	2	0.83446			19459;19460;19461	19461	-0.310686	-0.244744	-0.173612	-1.04498	-1.01632	-1.03687	4.07395e-05	0.789708	1.72872
Q1ZYR7	BOR2	tr|Q1ZYR7|Q1ZYR7_ORYSJ;tr|Q0JQ90|Q0JQ90_ORYSJ	394;394	tr|Q1ZYR7|Q1ZYR7_ORYSJ	tr|Q1ZYR7|Q1ZYR7_ORYSJ	>tr|Q1ZYR7|Q1ZYR7_ORYSJ Boron transporter OS=Oryza sativa subsp. japonica OX=39947 GN=BOR2 PE=2 SV=1;>tr|Q0JQ90|Q0JQ90_ORYSJ Os01g0175600 protein OS=Oryza sativa subsp. japonica OX=39947 GN=Os01g0175600 PE=2 SV=2	0.85082	0.00269013	35.848	1	S	KMVQTANEGLMNRASSLEIYGKIQGVFIEMD	X;X;X;X;X;X;X;X;X;X;X;X;X;X;X;Phospho (STY);X;X;X;X;X;X;X;X;X;X;X;X;X;X;X	XXXXXXXXXXXXXPPPPPPPPPXXXXXXXXX	AS(0.149)S(0.851)LEIYGK	3	3	0.25797			1880;1881	1880	-1.13577	-1.07802	-1.13263	-2.27506	-1.88612	-1.91794	0.00194702	0.910901	1.88022
Q10DR8	LOC_Os03g51250	tr|Q10DR8|Q10DR8_ORYSJ	325	tr|Q10DR8|Q10DR8_ORYSJ	tr|Q10DR8|Q10DR8_ORYSJ	>tr|Q10DR8|Q10DR8_ORYSJ Adenylyl cyclase-associated protein OS=Oryza sativa subsp. japonica OX=39947 GN=LOC_Os03g51250 PE=2 SV=1	0.993628	0.0090925	34.574	1	S	TAAPAAAPEKTSRAGSFSFKSGPPKLELQMG	X;X;X;X;X;X;X;X;X;X;X;X;X;X;X;Phospho (STY);X;X;X;X;X;X;X;X;X;X;X;X;X;X;X	XXXXXXXXXXXXXPPPPPPPXXXXXXXXXXX	AGS(0.994)FS(0.006)FK	3	3	-0.40667			818;819;820;821;822;823;824;825	819	4.67093	4.71324	4.68043	4.11123	4.01824	4.02866	3.83268e-05	0.635492	1.55347
Q2QNQ6	LOC_Os12g37060	tr|Q2QNQ6|Q2QNQ6_ORYSJ	156	tr|Q2QNQ6|Q2QNQ6_ORYSJ	tr|Q2QNQ6|Q2QNQ6_ORYSJ	>tr|Q2QNQ6|Q2QNQ6_ORYSJ Expressed protein OS=Oryza sativa subsp. japonica OX=39947 GN=LOC_Os12g37060 PE=2 SV=1	1	4.17e-06	63.674	1	S	TIEMMKKRHKIERDLSIGEEVGWSKNVQVAK	X;X;X;X;X;X;X;X;X;X;X;X;X;X;X;Phospho (STY);X;X;X;X;X;X;X;X;X;X;X;X;X;X;X	XXXXXXXXXXXXXPPPPPPPPPPPPXXXXXX	DLS(1)IGEEVGWSK	3	3	-1.0162			3142;3143	3143	-1.56641	-1.42808	-1.50581	-2.28838	-2.01542	-2.10149	0.00212526	0.634995	1.55293
Q2QW32	LOC_Os12g10740	tr|Q2QW32|Q2QW32_ORYSJ	602	tr|Q2QW32|Q2QW32_ORYSJ	tr|Q2QW32|Q2QW32_ORYSJ	>tr|Q2QW32|Q2QW32_ORYSJ Leucine Rich Repeat family protein, expressed OS=Oryza sativa subsp. japonica OX=39947 GN=LOC_Os12g10740 PE=2 SV=1	0.971927	3.14e-11	91.99	1	S	CIARRKRSPKQTEDRSQSYVSWDIKSTSTST	X;X;X;X;X;X;X;X;X;X;X;X;X;X;X;Phospho (STY);X;X;X;X;X;X;X;X;X;X;X;X;X;X;X	XXXXXXXXXXPPPPPPPPPPPPPPPXXXXXX	QT(0.021)EDRS(0.972)QS(0.007)YVSWDIK	6	3	0.58658			13222;13223;13224	13224	1.42421	1.44829	1.54607	0.755749	0.66656	0.582046	0.000209481	0.804738	1.74683
Q2QZU5	LOC_Os11g44810	tr|Q2QZU5|Q2QZU5_ORYSJ	95	tr|Q2QZU5|Q2QZU5_ORYSJ	tr|Q2QZU5|Q2QZU5_ORYSJ	>tr|Q2QZU5|Q2QZU5_ORYSJ Auxin-repressed protein-like protein ARP1, putative, expressed OS=Oryza sativa subsp. japonica OX=39947 GN=LOC_Os11g44810 PE=2 SV=1	0.821567	0.000145474	33.814	1	S	VWRSVFHPGSNLATKSLGANLFDRPQPNSPT	X;X;X;X;X;X;X;X;X;X;X;X;X;X;X;Phospho (STY);X;X;X;X;X;X;X;X;X;X;X;X;X;X;X	XXXXXXXXXXXXXXXPPPPPPPPPPPPPPPP	S(0.822)LGANLFDRPQPNS(0.067)PT(0.08)VY(0.026)DWLY(0.002)S(0.002)DET(0.001)R	1	3	-2.8019			15131	15131	-2.54839	-2.63559	-2.67622	-3.53999	-3.42704	-3.21775	0.00159031	0.774858	1.71102
Q339A6	LOC_Os10g22950	tr|Q339A6|Q339A6_ORYSJ	379	tr|Q339A6|Q339A6_ORYSJ	tr|Q339A6|Q339A6_ORYSJ	>tr|Q339A6|Q339A6_ORYSJ Anther ethylene-upregulated protein ER1, putative, expressed OS=Oryza sativa subsp. japonica OX=39947 GN=LOC_Os10g22950 PE=3 SV=1	0.977189	0.000242555	44.117	2	S	FLKTQSSNLSDILKDSFKKSDSFTRWMSKEL	X;X;X;X;X;Phospho (STY);Phospho (STY);X;X;Phospho (STY);X;X;X;X;X;Phospho (STY);X;X;X;X;X;X;X;X;X;X;X;X;X;X;X	XXXPPPPPPPPPPPPPPPPXXXXXXXXXXXX	T(0.044)QS(0.193)S(0.154)NLS(0.632)DILKDS(0.977)FKK	13	4	0.32585			17337;17339	17339	0.352154	0.336091	0.346114	-0.278342	-0.361571	-0.463805	0.000188151	0.712692	1.63886
Q5JMS3	Os01g0964000	tr|Q5JMS3|Q5JMS3_ORYSJ;tr|Q5N9F2|Q5N9F2_ORYSJ	185;187	tr|Q5JMS3|Q5JMS3_ORYSJ	tr|Q5JMS3|Q5JMS3_ORYSJ	>tr|Q5JMS3|Q5JMS3_ORYSJ Os01g0964000 protein OS=Oryza sativa subsp. japonica OX=39947 GN=Os01g0964000 PE=2 SV=1;>tr|Q5N9F2|Q5N9F2_ORYSJ Os01g0866300 protein OS=Oryza sativa subsp. japonica OX=39947 GN=Os01g0866300 PE=2 SV=1	1	0.000208361	63.677	1	S	HKTIDSVLSRGERLDSLVEKSSDLSAASQMF	X;X;X;X;X;X;X;X;Phospho (STY);X;X;X;X;X;X;Phospho (STY);X;X;X;X;X;X;X;X;X;X;X;X;X;X;X	XXXXXXXXXXPPPPPPPPPPXXXXXXXXXXX	LDS(1)LVEK	3	2	-0.79883			6211;6212;9911;9912;9913	9913	2.59711	2.57127	2.6843	1.90836	2.04466	1.83358	0.000619384	0.688694	1.61182
Q5Z9P6	Os06g0715500	tr|Q5Z9P6|Q5Z9P6_ORYSJ	253	tr|Q5Z9P6|Q5Z9P6_ORYSJ	tr|Q5Z9P6|Q5Z9P6_ORYSJ	>tr|Q5Z9P6|Q5Z9P6_ORYSJ Signal sequence receptor subunit alpha OS=Oryza sativa subsp. japonica OX=39947 GN=Os06g0715500 PE=2 SV=1	0.851659	8.26e-48	192.8	1	S	MDEWLEGTAFAQGSKSKKKK___________	X;X;X;X;X;X;X;X;X;X;X;X;X;X;X;Phospho (STY);X;X;X;X;X;X;X;X;X;X;X;X;X;X;X	PPPPPPPPPPPPPPPPPXXXXXXXXXXXXXX	VELGTGTTDANMDEWLEGT(0.003)AFAQGS(0.146)KS(0.852)K	27	4	-0.11051			18180;18181	18181	0.466298	0.426126	0.642984	-0.476648	-0.413307	-0.367929	0.000225912	0.931097	1.90673
Q5ZA31	Os06g0300800	tr|Q5ZA31|Q5ZA31_ORYSJ;tr|Q5ZA32|Q5ZA32_ORYSJ	550;669	tr|Q5ZA31|Q5ZA31_ORYSJ	tr|Q5ZA31|Q5ZA31_ORYSJ	>tr|Q5ZA31|Q5ZA31_ORYSJ Os06g0300800 protein OS=Oryza sativa subsp. japonica OX=39947 GN=Os06g0300800 PE=3 SV=1;>tr|Q5ZA32|Q5ZA32_ORYSJ Os06g0300800 protein OS=Oryza sativa subsp. japonica OX=39947 GN=Os06g0300800 PE=3 SV=1	0.99904	6.47e-12	73.86	1	S	YLEEGALRRGPSRGPSLGDRDIDPSSLDYSS	X;X;X;X;X;X;X;X;X;X;X;X;X;X;X;Phospho (STY);X;X;X;X;X;X;X;X;X;X;X;X;X;X;X	XXXXXXXXXXXXXPPPPPPPPPPPPPPPPPP	GPS(0.999)LGDRDIDPS(0.001)SLDYSSK	3	3	-0.039838			7176;7177;7178	7176	1.262	1.32447	1.36086	0.717292	0.653002	0.760361	0.000140908	0.605558	1.52157
Q69IN8	Os09g0513000	tr|Q69IN8|Q69IN8_ORYSJ	16	tr|Q69IN8|Q69IN8_ORYSJ	tr|Q69IN8|Q69IN8_ORYSJ	>tr|Q69IN8|Q69IN8_ORYSJ Os09g0513000 protein OS=Oryza sativa subsp. japonica OX=39947 GN=Os09g0513000 PE=4 SV=1	0.98847	2.13e-05	77.692	1	S	MEDQKKNAKPEGSSGSQRGAPPAPDAGLPNP	X;X;X;X;X;X;X;X;X;X;X;X;X;X;X;Phospho (STY);X;X;X;X;X;X;X;X;X;X;X;X;X;X;X	XXXXXXPPPPPPPPPPPPXXXXXXXXXXXXX	NAKPEGS(0.001)S(0.01)GS(0.988)QR	10	3	-0.39388			11934;11935;11936;11937;11938;11939	11938	1.22592	1.23378	1.28418	0.544792	0.311776	0.538574	0.000576254	0.782911	1.7206
Q6ES98	Os09g0346700	tr|Q6ES98|Q6ES98_ORYSJ	126	tr|Q6ES98|Q6ES98_ORYSJ	tr|Q6ES98|Q6ES98_ORYSJ	>tr|Q6ES98|Q6ES98_ORYSJ Os09g0346700 protein OS=Oryza sativa subsp. japonica OX=39947 GN=Os09g0346700 PE=2 SV=1	0.809186	4.41e-05	49.986	1	S	AASKMKKALGLRSSASSKGGSPGSGGGGKSV	X;X;X;X;X;X;X;X;X;X;X;X;X;X;X;Phospho (STY);X;X;X;X;Phospho (STY);X;X;X;X;X;X;X;X;X;X	XXXXXXXXXXXXPPPPPPPPPPPPPPPPPXX	S(0.024)S(0.082)AS(0.809)S(0.081)KGGS(0.004)PGSGGGGK	4	3	-0.94987			15663;15664;15665	15663	0.963549	0.883781	1.01749	0.199554	0.251768	0.192081	6.75747e-05	0.740473	1.67072
Q6H5Y1	Os02g0228300	tr|Q6H5Y1|Q6H5Y1_ORYSJ	991	tr|Q6H5Y1|Q6H5Y1_ORYSJ	tr|Q6H5Y1|Q6H5Y1_ORYSJ	>tr|Q6H5Y1|Q6H5Y1_ORYSJ Os02g0228300 protein OS=Oryza sativa subsp. japonica OX=39947 GN=Os02g0228300 PE=4 SV=1	0.875487	1.48e-06	61.661	1	S	GAPSLSKGKKDGKGKSSSAGTTAGKMWGAGT	X;X;X;X;X;X;X;X;X;X;X;X;X;X;X;Phospho (STY);X;X;X;X;X;X;X;X;X;X;X;X;X;X;X	XXXXXXXXXXXXXPPPPPPPPPPPPXXXXXX	GKS(0.875)S(0.086)S(0.038)AGTTAGK	3	3	0.26367			6854	6854	0.410279	0.282269	0.330396	-0.588202	-0.564745	-0.49829	4.19071e-05	0.891393	1.85497
Q6YUR8	CSP1	tr|Q6YUR8|Q6YUR8_ORYSJ	94	tr|Q6YUR8|Q6YUR8_ORYSJ	tr|Q6YUR8|Q6YUR8_ORYSJ	>tr|Q6YUR8|Q6YUR8_ORYSJ Cold shock domain protein 1 OS=Oryza sativa subsp. japonica OX=39947 GN=CSP1 PE=2 SV=1	1	5.56e-22	117.31	1	S	KGGAGGGGGGGGGFGSRGGGGSGGGGRSYGG	X;X;X;X;X;X;X;X;X;X;X;X;X;X;X;Phospho (STY);X;X;X;X;X;X;X;X;X;X;X;X;X;X;X	XPPPPPPPPPPPPPPPPXXXXXXXXXXXXXX	GGAGGGGGGGGGFGS(1)R	15	2	-0.49151			6324;6325	6325	0.377529	0.376767	0.363125	-0.448757	-0.363616	-0.563987	0.000140033	0.831261	1.77924
Q6Z5M6	Os02g0722800	tr|Q6Z5M6|Q6Z5M6_ORYSJ	164	tr|Q6Z5M6|Q6Z5M6_ORYSJ	tr|Q6Z5M6|Q6Z5M6_ORYSJ	>tr|Q6Z5M6|Q6Z5M6_ORYSJ Os02g0722800 protein OS=Oryza sativa subsp. japonica OX=39947 GN=Os02g0722800 PE=3 SV=1	0.788116	0.0026694	35.208	2	S	QPIPAMPSAPPARMLSSTSSKMPRGRLLGGG	X;X;X;X;X;X;X;X;X;X;X;X;X;X;X;Phospho (STY);X;X;Phospho (STY);X;X;X;X;X;X;X;X;X;X;X;X	XXXXXXXXXXXXXPPPPPPPPPPPXXXXXXX	MLS(0.788)S(0.125)T(0.129)S(0.532)S(0.426)KMPR	3	3	-0.26589			11698	11698	-0.694546	-0.696025	-0.69096	-1.5439	-1.71323	-1.57785	5.93471e-05	0.917819	1.88926
Q6ZHS1	Os02g0188000	tr|Q6ZHS1|Q6ZHS1_ORYSJ	250	tr|Q6ZHS1|Q6ZHS1_ORYSJ	tr|Q6ZHS1|Q6ZHS1_ORYSJ	>tr|Q6ZHS1|Q6ZHS1_ORYSJ Glycosyltransferase OS=Oryza sativa subsp. japonica OX=39947 GN=Os02g0188000 PE=3 SV=1	0.768094	1.77e-10	60.521	1	S	ELERDVVDALRGVATSPPPPPLIPVGPLIEL	X;X;X;X;X;X;X;X;X;X;X;X;X;X;X;Phospho (STY);X;X;X;X;X;X;X;X;X;X;X;X;X;X;X	XXXXXXXXXXXPPPPPPPPPPPPPPPPPPPP	GVAT(0.232)S(0.768)PPPPPLIPVGPLIELEGDAAVR	5	3	-0.16303			7528;7529;7530	7529	-3.74486	-4.53074	-4.11923	-4.82639	-5.09904	-4.73556	0.039972	0.755384	1.68808
Q6ZI51	Os02g0595800	tr|Q6ZI51|Q6ZI51_ORYSJ	215	tr|Q6ZI51|Q6ZI51_ORYSJ	tr|Q6ZI51|Q6ZI51_ORYSJ	>tr|Q6ZI51|Q6ZI51_ORYSJ Os02g0595800 protein OS=Oryza sativa subsp. japonica OX=39947 GN=Os02g0595800 PE=4 SV=1	0.99971	3.55e-08	86.199	1	S	WSRGKKPMPMPSRYPSLGSGGGGGGFRDSPT	X;X;X;X;X;X;X;X;X;X;X;X;X;X;X;Phospho (STY);X;X;X;X;X;X;X;X;X;X;X;X;X;X;X	XXXXXXXXXXXXXPPPPPPPPPPPPPPXXXX	YPS(1)LGSGGGGGGFR	3	2	-1.1551			20002;20003;20004	20004	0.961485	1.082	1.07118	0.460162	0.324196	0.276387	0.000522051	0.684641	1.6073
Q6ZKM1	Os08g0500100	tr|Q6ZKM1|Q6ZKM1_ORYSJ;tr|Q6ZKM0|Q6ZKM0_ORYSJ	142;142	tr|Q6ZKM1|Q6ZKM1_ORYSJ	tr|Q6ZKM1|Q6ZKM1_ORYSJ	>tr|Q6ZKM1|Q6ZKM1_ORYSJ Os08g0500100 protein OS=Oryza sativa subsp. japonica OX=39947 GN=Os08g0500100 PE=3 SV=1;>tr|Q6ZKM0|Q6ZKM0_ORYSJ Os08g0500100 protein OS=Oryza sativa subsp. japonica OX=39947 GN=Os08g0500100 PE=2 SV=1	1	0.0145802	15.346	1	S	TFGPPVMDGPPQRVLSGVLRSFLASGQAGVP	X;X;X;X;X;X;X;X;X;X;X;X;X;X;X;Phospho (STY);X;X;X;X;X;X;X;X;X;X;X;X;X;X;X	XXXXXXXXXXXXXPPPPPPPXXXXXXXXXXX	VLS(1)GVLR	3	2	-1.2734			18621;18622	18622	-1.25491	-1.20061	-1.14445	-2.06692	-2.21827	-2.2177	8.42372e-05	0.967639	1.95564
Q7XTL6	Os04g0687100	tr|Q7XTL6|Q7XTL6_ORYSJ;tr|Q75HX3|Q75HX3_ORYSJ;tr|Q5N9F4|Q5N9F4_ORYSJ	25;36;25	tr|Q7XTL6|Q7XTL6_ORYSJ	tr|Q7XTL6|Q7XTL6_ORYSJ	>tr|Q7XTL6|Q7XTL6_ORYSJ Inorganic diphosphatase OS=Oryza sativa subsp. japonica OX=39947 GN=Os04g0687100 PE=2 SV=2;>tr|Q75HX3|Q75HX3_ORYSJ Inorganic diphosphatase OS=Oryza sativa subsp. japonica OX=39947 GN=Os05g0438500 PE=2 SV=1;>tr|Q5N9F4|Q5N9F4_ORYSJ In	0.985921	0.00141974	32.979	1	S	AGQPRRAPKLNERILSSLSRRSVAAHPWHDL	X;X;X;X;X;X;X;X;X;X;X;X;X;X;X;Phospho (STY);X;X;X;X;X;X;X;X;X;X;X;X;X;X;X	XXXXXXXXXXXXXPPPPPPPXXXXXXXXXXX	ILS(0.986)S(0.014)LSR	3	2	-0.27979			8480;8481	8481	0.470658	0.488448	0.504195	-0.15631	-0.0686248	-0.193832	8.16717e-05	0.627355	1.54473
Q7XTL6	Os04g0687100	tr|Q7XTL6|Q7XTL6_ORYSJ;tr|Q75HX3|Q75HX3_ORYSJ;tr|Q5N9F4|Q5N9F4_ORYSJ	26;37;26	tr|Q7XTL6|Q7XTL6_ORYSJ	tr|Q7XTL6|Q7XTL6_ORYSJ	>tr|Q7XTL6|Q7XTL6_ORYSJ Inorganic diphosphatase OS=Oryza sativa subsp. japonica OX=39947 GN=Os04g0687100 PE=2 SV=2;>tr|Q75HX3|Q75HX3_ORYSJ Inorganic diphosphatase OS=Oryza sativa subsp. japonica OX=39947 GN=Os05g0438500 PE=2 SV=1;>tr|Q5N9F4|Q5N9F4_ORYSJ In	0.839353	0.00157031	27.21	1	S	GQPRRAPKLNERILSSLSRRSVAAHPWHDLE	X;X;X;X;X;X;X;X;X;X;X;X;X;X;X;Phospho (STY);X;X;X;X;X;X;X;X;X;X;X;X;X;X;X	XXXXXXXXXXXXPPPPPPPXXXXXXXXXXXX	ILS(0.16)S(0.839)LS(0.001)R	4	2	-0.30105			8482;8483	8483	0.357422	0.395098	0.390534	-0.256704	-0.264753	-0.374756	6.95323e-05	0.679756	1.60187
Q7G649	LOC_Os10g18340	tr|Q7G649|Q7G649_ORYSJ	31	tr|Q7G649|Q7G649_ORYSJ	tr|Q7G649|Q7G649_ORYSJ	>tr|Q7G649|Q7G649_ORYSJ Expressed protein OS=Oryza sativa subsp. japonica OX=39947 GN=LOC_Os10g18340 PE=2 SV=1	1	0.0275677	17.761	1	S	GKVVAEATMSVFQQKSVEGVDKKEVAGAAAD	X;X;X;X;X;X;X;X;X;X;X;X;X;X;X;Phospho (STY);X;X;X;X;X;X;X;X;X;X;X;X;X;X;X	XXXXXXXXXXXXXXXPPPPPPPPXXXXXXXX	S(1)VEGVDKK	1	2	-0.32865			16185;16186;16187	16187	1.61163	1.58161	1.56085	0.725053	0.617501	0.680969	1.22949e-05	0.91019	1.87929
Q7X8A1	Os04g0459500	tr|Q7X8A1|Q7X8A1_ORYSJ	116	tr|Q7X8A1|Q7X8A1_ORYSJ	tr|Q7X8A1|Q7X8A1_ORYSJ	>tr|Q7X8A1|Q7X8A1_ORYSJ Glyceraldehyde-3-phosphate dehydrogenase OS=Oryza sativa subsp. japonica OX=39947 GN=Os04g0459500 PE=2 SV=1	0.8144	8.83e-21	92.066	1	S	DTGGVKQASHLLKYDSTLGIFDADVKPVGDN	X;X;X;X;X;X;X;X;X;X;X;X;X;X;X;Phospho (STY);X;X;X;X;X;X;X;X;X;X;X;X;X;X;X	XXXXXXXXXXXXXPPPPPPPPPPPPPPPPPP	YDS(0.814)T(0.185)LGIFDADVKPVGDNAISVDGK	3	3	-0.073306			19708	19708	-1.50791	-1.53447	-1.5851	-2.18235	-2.15117	-2.16408	1.3899e-05	0.623371	1.54047
Q7XJX6	Os04g0643100	tr|Q7XJX6|Q7XJX6_ORYSJ	249	tr|Q7XJX6|Q7XJX6_ORYSJ	tr|Q7XJX6|Q7XJX6_ORYSJ	>tr|Q7XJX6|Q7XJX6_ORYSJ Os04g0643100 protein OS=Oryza sativa subsp. japonica OX=39947 GN=Os04g0643100 PE=2 SV=2	0.995762	2.28e-09	65.098	1	S	AEEQLAEEVALKRGISVGAATNMLVAGGERD	X;X;X;X;X;X;X;X;X;X;X;X;X;X;X;Phospho (STY);X;X;X;X;X;X;X;X;X;X;X;X;X;X;X	XXXXXXXXXXXXXPPPPPPPPPPPPPPPPPP	GIS(0.996)VGAAT(0.004)NMLVAGGERDEDIIF	3	3	-0.2199			6774;6775	6774	-2.15018	-2.27634	-2.24854	-2.72923	-3.11291	-3.20046	0.00620244	0.789181	1.72809
Q7XVB9	Os04g0382200	tr|Q7XVB9|Q7XVB9_ORYSJ	223	tr|Q7XVB9|Q7XVB9_ORYSJ	tr|Q7XVB9|Q7XVB9_ORYSJ	>tr|Q7XVB9|Q7XVB9_ORYSJ Exocyst subunit Exo70 family protein OS=Oryza sativa subsp. japonica OX=39947 GN=Os04g0382200 PE=3 SV=2	0.921718	7.72e-15	78.392	1	S	TPHSLEGGPDTARSASLVGNPFDDQVFDLVR	X;X;X;X;X;X;X;X;X;X;X;X;X;X;X;Phospho (STY);X;X;X;X;X;X;X;X;X;X;X;X;X;X;X	XXXXXXXXXXXXXPPPPPPPPPPPPPPPPPP	S(0.078)AS(0.922)LVGNPFDDQVFDLVRPEAIDDLR	3	3	-0.61654			14221;14222	14221	-2.89286	-3.08204	-2.64775	-3.82424	-3.41387	-3.90513	0.0130711	0.840197	1.7903
Q7XXQ8	Os06g0232000	tr|Q7XXQ8|Q7XXQ8_ORYSJ	225	tr|Q7XXQ8|Q7XXQ8_ORYSJ	tr|Q7XXQ8|Q7XXQ8_ORYSJ	>tr|Q7XXQ8|Q7XXQ8_ORYSJ Os06g0232000 protein OS=Oryza sativa subsp. japonica OX=39947 GN=Os06g0232000 PE=2 SV=1	0.991008	2.96e-09	74.455	1	S	GRKPQQEESYGSEYGSGYGRKPQAESYGSGY	X;X;X;X;X;X;X;X;X;X;X;X;X;X;X;Phospho (STY);X;X;X;X;X;X;X;X;X;X;X;X;X;X;X	XXPPPPPPPPPPPPPPPPPPXXXXXXXXXXX	KPQQEESYGS(0.009)EYGS(0.991)GYGR	14	3	-0.25109			9331	9331	-1.57777	-1.33078	-1.36259	-2.6255	-2.6507	-2.27578	0.00160108	1.09361	2.13408
Q7XXQ8	Os06g0232000	tr|Q7XXQ8|Q7XXQ8_ORYSJ;tr|A0A0P0WUS9|A0A0P0WUS9_ORYSJ	279;17	tr|Q7XXQ8|Q7XXQ8_ORYSJ	tr|Q7XXQ8|Q7XXQ8_ORYSJ	>tr|Q7XXQ8|Q7XXQ8_ORYSJ Os06g0232000 protein OS=Oryza sativa subsp. japonica OX=39947 GN=Os06g0232000 PE=2 SV=1;>tr|A0A0P0WUS9|A0A0P0WUS9_ORYSJ Os06g0232000 protein (Fragment) OS=Oryza sativa subsp. japonica OX=39947 GN=Os06g0232000 PE=4 SV=1	0.933687	0.000501625	45.245	1	S	SYGSAGYGGRKTEEESYGGGSGYGYGKKAQE	X;X;X;Phospho (STY);X;X;X;X;X;X;X;X;X;X;X;Phospho (STY);X;X;X;X;X;X;X;X;X;X;X;X;X;X;X	XXXXXXXXXXPPPPPPPPPPPPPPPPPXXXX	KT(0.063)EEES(0.934)Y(0.003)GGGSGYGYGK	6	3	2.9861			9513	9513	-0.636423	-0.695252	-0.817733	-1.43197	-1.42414	-1.51177	0.000253883	0.73949	1.66959
Q7XXQ8	Os06g0232000	tr|Q7XXQ8|Q7XXQ8_ORYSJ;tr|A0A0P0WUS9|A0A0P0WUS9_ORYSJ	284;22	tr|Q7XXQ8|Q7XXQ8_ORYSJ	tr|Q7XXQ8|Q7XXQ8_ORYSJ	>tr|Q7XXQ8|Q7XXQ8_ORYSJ Os06g0232000 protein OS=Oryza sativa subsp. japonica OX=39947 GN=Os06g0232000 PE=2 SV=1;>tr|A0A0P0WUS9|A0A0P0WUS9_ORYSJ Os06g0232000 protein (Fragment) OS=Oryza sativa subsp. japonica OX=39947 GN=Os06g0232000 PE=4 SV=1	0.999261	9.91e-13	84.534	1	S	GYGGRKTEEESYGGGSGYGYGKKAQEESEGT	X;X;X;X;X;X;X;X;X;X;X;X;X;X;X;Phospho (STY);X;X;X;X;X;X;X;X;X;X;X;X;X;X;X	XXXXXPPPPPPPPPPPPPPPPPXXXXXXXXX	KTEEESYGGGS(0.999)GYGYGK	11	3	-0.5204			9511;9512	9511	0.975972	0.976554	0.928196	-0.0716429	-0.0973786	-0.0183137	3.48244e-06	1.02269	2.0317
P28752	TUBA1	sp|P28752|TBA1_ORYSJ;tr|Q10PW2|Q10PW2_ORYSJ	349;349	sp|P28752|TBA1_ORYSJ	sp|P28752|TBA1_ORYSJ	>sp|P28752|TBA1_ORYSJ Tubulin alpha-1 chain OS=Oryza sativa subsp. japonica OX=39947 GN=TUBA1 PE=1 SV=1;>tr|Q10PW2|Q10PW2_ORYSJ Tubulin alpha chain OS=Oryza sativa subsp. japonica OX=39947 GN=TubA PE=2 SV=1	0.999991	2.62e-05	73.469	1	T	TIKTKRTVQFVDWCPTGFKCGINYQPPSVVP	X;X;X;X;X;X;X;X;X;X;X;X;X;X;X;Phospho (STY);X;X;X;X;X;X;X;X;X;X;X;X;X;X;X	XXXXXXPPPPPPPPPPPPPXXXXXXXXXXXX	TVQFVDWCPT(1)GFK	10	2	0.68225			17635;17636;17637;17638;17639;17640;17641;17642;17643;17644;17645	17641	1.79363	1.83322	1.81193	0.397003	0.471881	0.454089	6.94226e-07	1.37194	2.58818
Q10NX2	LOC_Os03g15050	tr|Q10NX2|Q10NX2_ORYSJ	53	tr|Q10NX2|Q10NX2_ORYSJ	tr|Q10NX2|Q10NX2_ORYSJ	>tr|Q10NX2|Q10NX2_ORYSJ Phosphoenolpyruvate carboxykinase (ATP) OS=Oryza sativa subsp. japonica OX=39947 GN=LOC_Os03g15050 PE=2 SV=1	0.945528	1.13e-13	76.379	2	T	TIDELHSLQRKRSAPTTPIKDGASSPFAAAL	X;X;X;X;X;X;X;X;X;X;X;X;X;X;X;Phospho (STY);Phospho (STY);X;X;X;X;X;X;X;X;X;X;X;X;X;X	XXXXXXXXXXXXPPPPPPPPPPPPPPPPPPP	S(0.076)APT(0.946)T(0.978)PIKDGASSPFAAALSEEER	4	3	-0.10878			14144;14145	14145	-0.770893	-0.923358	-0.799172	-1.45892	-1.54057	-1.46124	0.000263293	0.655773	1.57546
Q10NX2	LOC_Os03g15050	tr|Q10NX2|Q10NX2_ORYSJ	54	tr|Q10NX2|Q10NX2_ORYSJ	tr|Q10NX2|Q10NX2_ORYSJ	>tr|Q10NX2|Q10NX2_ORYSJ Phosphoenolpyruvate carboxykinase (ATP) OS=Oryza sativa subsp. japonica OX=39947 GN=LOC_Os03g15050 PE=2 SV=1	0.978193	1.13e-13	76.379	2	T	IDELHSLQRKRSAPTTPIKDGASSPFAAALS	X;X;X;X;X;X;X;X;X;X;X;X;X;X;Phospho (STY);Phospho (STY);X;X;X;X;X;X;X;X;X;X;X;X;X;X;X	XXXXXXXXXXXPPPPPPPPPPPPPPPPPPPP	S(0.076)APT(0.946)T(0.978)PIKDGASSPFAAALSEEER	5	3	-0.10878			14144;14145	14145	-0.770893	-0.923358	-0.799172	-1.45892	-1.54057	-1.46124	0.000263293	0.655773	1.57546
Q337E7	LOC_Os10g36000	tr|Q337E7|Q337E7_ORYSJ	60	tr|Q337E7|Q337E7_ORYSJ	tr|Q337E7|Q337E7_ORYSJ	>tr|Q337E7|Q337E7_ORYSJ Os10g0503800 protein OS=Oryza sativa subsp. japonica OX=39947 GN=LOC_Os10g36000 PE=2 SV=2	0.999994	2.7e-07	137.03	1	T	TGGSHERDALLTTVATEKRISLIKAWEENEK	X;X;X;X;X;X;X;X;X;X;X;X;X;X;X;Phospho (STY);X;X;X;X;X;X;X;X;X;X;X;X;X;X;X	XXXXXXXPPPPPPPPPPPPXXXXXXXXXXXX	DALLTTVAT(1)EKR	9	3	0.28825			2568;2569;2570	2568	1.63068	1.6063	1.63893	1.0153	0.937479	1.00439	1.67719e-05	0.639579	1.55787
Q6Z3Y9	Os07g0694000	tr|Q6Z3Y9|Q6Z3Y9_ORYSJ	273	tr|Q6Z3Y9|Q6Z3Y9_ORYSJ	tr|Q6Z3Y9|Q6Z3Y9_ORYSJ	>tr|Q6Z3Y9|Q6Z3Y9_ORYSJ Phosphoinositide phospholipase C OS=Oryza sativa subsp. japonica OX=39947 GN=Os07g0694000 PE=2 SV=1	1	1.58e-07	99.37	1	T	KPPREYLQAKDGNAATIKEDAKAAATDDAAW	X;X;X;X;X;X;X;X;X;X;X;X;X;X;X;Phospho (STY);X;X;X;X;X;X;X;X;X;X;X;X;X;X;X	XXXXXXXXXXPPPPPPPPPPPPXXXXXXXXX	DGNAAT(1)IKEDAK	6	2	0.59191			2848;2849;2850;2851;2852;2853	2853	3.41762	3.37998	3.45612	2.45874	2.39532	2.43187	4.199e-06	0.989266	1.98517
