# Supplementary material for: ZmPP2C26 Alternative Splicing Variants Negatively Regulate Drought Tolerance in Maize
Source: Front Plant Sci. 2022 Apr 8;13:851531. doi: 10.3389/fpls.2022.851531 (PMC9024303; doi:10.3389/fpls.2022.851531)
Supplement: Supplementary file 6 [file Data_Sheet_6.XLSX]

## Sheet:  SUPPLEMENTARY TABLE 5-1
SUPPLEMENTARY TABLE 5-1 Phosphopeptides showed significantly different level in ZmPP2C26L-OE and shared by ZmPP2C26S-OE in comparison to WT.
Accession	Gene Name	Proteins	Positions within proteins	Leading proteins	Protein	Fasta headers	Localization prob	PEP	Delta score	Number of Phospho (STY)	Amino acid	Sequence window	Modification window	Peptide window coverage	Phospho (STY) Probabilities	Position in peptide	Charge	Mass error [ppm]	Reverse	Potential contaminant	MS/MS IDs	Best localization MS/MS ID	L1-1	L1-2	L1-3	Nip-1	Nip-2	Nip-3	P-value	log2(FC)	FC
Q651D5	PIP2-7	sp|Q651D5|PIP27_ORYSJ	282	sp|Q651D5|PIP27_ORYSJ	sp|Q651D5|PIP27_ORYSJ	>sp|Q651D5|PIP27_ORYSJ Probable aquaporin PIP2-7 OS=Oryza sativa subsp. japonica OX=39947 GN=PIP2-7 PE=2 SV=2	0.892322	5.96e-05	68.29	2	S	YHKLVLRGEAAKALSSFRSTSVTA_______	X;X;X;X;X;X;X;X;X;X;X;X;X;X;X;Phospho (STY);X;X;Phospho (STY);Phospho (STY);Phospho (STY);X;X;X;X;X;X;X;X;X;X	XXXXXXXXXXXXPPPPPPPPPPPPXXXXXXX	ALS(0.101)S(0.892)FRS(0.081)T(0.424)S(0.187)VT(0.315)A	4	2	-1.1318			1247;1248;1249;1250;1251;1252	1252	2.30572	2.3893	2.36468	0.540436	0.69435	0.66101	5.32646e-06	1.7213	3.29733
Q6ZHS1	Os02g0188000	tr|Q6ZHS1|Q6ZHS1_ORYSJ	250	tr|Q6ZHS1|Q6ZHS1_ORYSJ	tr|Q6ZHS1|Q6ZHS1_ORYSJ	>tr|Q6ZHS1|Q6ZHS1_ORYSJ Glycosyltransferase OS=Oryza sativa subsp. japonica OX=39947 GN=Os02g0188000 PE=3 SV=1	0.768094	1.77e-10	60.521	1	S	ELERDVVDALRGVATSPPPPPLIPVGPLIEL	X;X;X;X;X;X;X;X;X;X;X;X;X;X;X;Phospho (STY);X;X;X;X;X;X;X;X;X;X;X;X;X;X;X	XXXXXXXXXXXPPPPPPPPPPPPPPPPPPPP	GVAT(0.232)S(0.768)PPPPPLIPVGPLIELEGDAAVR	5	3	-0.16303			7528;7529;7530	7529	-3.93822	-4.15321	-3.90701	-4.82639	-5.09904	-4.73556	0.0026845	0.887513	1.84998
Q75IQ9	Os05g0164100	tr|Q75IQ9|Q75IQ9_ORYSJ;tr|Q0DKG9|Q0DKG9_ORYSJ	298;298	tr|Q75IQ9|Q75IQ9_ORYSJ	tr|Q75IQ9|Q75IQ9_ORYSJ	>tr|Q75IQ9|Q75IQ9_ORYSJ Os05g0164100 protein OS=Oryza sativa subsp. japonica OX=39947 GN=Os05g0164100 PE=4 SV=1;>tr|Q0DKG9|Q0DKG9_ORYSJ Os05g0164100 protein OS=Oryza sativa subsp. japonica OX=39947 GN=Os05g0164100 PE=4 SV=1	0.9994	8.15e-05	152.61	1	S	DSFKKLQVSGIVESKSVDTLTTLQKQDGQKG	X;Phospho (STY);X;X;X;X;X;X;X;X;X;X;X;X;X;Phospho (STY);X;X;X;X;X;X;X;X;X;X;X;X;X;X;X	XXXXXXXXXXXXXXXPPPPPPPPPPXXXXXX	S(0.999)VDT(0.001)LTTLQK	1	2	1.1274			16173;16174;16175;16176;16177;16178;16179;16180;16181;16182	16174	3.69977	3.70075	3.71663	2.85395	2.79844	2.80285	1.16369e-06	0.887303	1.84972
Q7X8A1	Os04g0459500	tr|Q7X8A1|Q7X8A1_ORYSJ	116	tr|Q7X8A1|Q7X8A1_ORYSJ	tr|Q7X8A1|Q7X8A1_ORYSJ	>tr|Q7X8A1|Q7X8A1_ORYSJ Glyceraldehyde-3-phosphate dehydrogenase OS=Oryza sativa subsp. japonica OX=39947 GN=Os04g0459500 PE=2 SV=1	0.8144	8.83e-21	92.066	1	S	DTGGVKQASHLLKYDSTLGIFDADVKPVGDN	X;X;X;X;X;X;X;X;X;X;X;X;X;X;X;Phospho (STY);X;X;X;X;X;X;X;X;X;X;X;X;X;X;X	XXXXXXXXXXXXXPPPPPPPPPPPPPPPPPP	YDS(0.814)T(0.185)LGIFDADVKPVGDNAISVDGK	3	3	-0.073306			19708	19708	-1.40426	-1.32966	-1.29164	-2.18235	-2.15117	-2.16408	1.779e-05	0.82401	1.77032
A0A0P0WAD7	Os04g0423600	tr|A0A0P0WAD7|A0A0P0WAD7_ORYSJ	47	tr|A0A0P0WAD7|A0A0P0WAD7_ORYSJ	tr|A0A0P0WAD7|A0A0P0WAD7_ORYSJ	>tr|A0A0P0WAD7|A0A0P0WAD7_ORYSJ Os04g0423600 protein OS=Oryza sativa subsp. japonica OX=39947 GN=Os04g0423600 PE=3 SV=1	0.999938	1.56e-11	83.544	1	S	RSGDDYGRDTGLFNESGNDDNESGYKNTNTD	X;X;X;X;X;X;X;X;X;X;X;X;X;X;X;Phospho (STY);X;X;X;X;X;X;X;X;X;X;X;X;X;X;X	XXXXXXXXPPPPPPPPPPPPPPPPPPXXXXX	DTGLFNES(1)GNDDNESGYK	8	3	0.72487			3442;3443	3443	-0.222652	-0.210243	-0.232281	-0.981196	-0.863181	-1.10414	0.000402845	0.761113	1.6948
Q7G649	LOC_Os10g18340	tr|Q7G649|Q7G649_ORYSJ	9	tr|Q7G649|Q7G649_ORYSJ	tr|Q7G649|Q7G649_ORYSJ	>tr|Q7G649|Q7G649_ORYSJ Expressed protein OS=Oryza sativa subsp. japonica OX=39947 GN=LOC_Os10g18340 PE=2 SV=1	0.995357	5.05e-05	92.056	1	S	_______MAEENKSGSGDLMASGKVVAEATM	X;X;X;X;X;X;X;X;X;X;X;X;X;X;X;Phospho (STY);X;X;X;Oxidation (M);X;X;X;X;X;X;X;X;X;X;X	XXXXXXXXXXXXXPPPPPPPPPPPXXXXXXX	S(0.003)GS(0.995)GDLMAS(0.002)GK	3	2	-0.37179			14724;14725;14727;14728;14729;14731;14732;14733;14735;14736;14737	14736	3.23139	3.23475	3.2714	2.55285	2.52403	2.58981	7.27595e-06	0.690282	1.6136
Q7XWP1	Os04g0252200	sp|Q7XWP1|CPSF1_ORYSJ	477	sp|Q7XWP1|CPSF1_ORYSJ	sp|Q7XWP1|CPSF1_ORYSJ	>sp|Q7XWP1|CPSF1_ORYSJ Probable cleavage and polyadenylation specificity factor subunit 1 OS=Oryza sativa subsp. japonica OX=39947 GN=Os04g0252200 PE=3 SV=2	0.98626	1.67e-08	59.117	1	S	IEGDLPFSKRLKRIPSDVLQDVTSVEELSFQ	X;X;X;X;X;X;X;X;X;X;X;X;X;X;X;Phospho (STY);X;X;X;X;X;X;X;X;X;X;X;X;X;X;X	XXXXXXXXXXXXPPPPPPPPPPPPPPPPPPP	RIPS(0.986)DVLQDVT(0.007)S(0.007)VEELS(0.001)FQNIIAPNSLESAQK	4	4	-0.079942			13536;13537;13538	13536	-3.28648	-3.82564	-3.76432	-4.20809	-4.24296	-4.44424	0.0222557	0.672952	1.59433
A0A0P0WAD7	Os04g0423600	tr|A0A0P0WAD7|A0A0P0WAD7_ORYSJ	119	tr|A0A0P0WAD7|A0A0P0WAD7_ORYSJ	tr|A0A0P0WAD7|A0A0P0WAD7_ORYSJ	>tr|A0A0P0WAD7|A0A0P0WAD7_ORYSJ Os04g0423600 protein OS=Oryza sativa subsp. japonica OX=39947 GN=Os04g0423600 PE=3 SV=1	0.789239	2.22e-08	76.174	1	S	YSSSGGYSKSGTDNYSGSGGYNKSGNNDYSG	X;Phospho (STY);Phospho (STY);X;X;X;X;X;X;X;X;X;X;X;X;Phospho (STY);X;X;X;X;X;X;X;X;X;X;X;X;X;X;X	XXXXXXXXXPPPPPPPPPPPPPPXXXXXXXX	S(0.001)GT(0.037)DNYS(0.789)GS(0.172)GGYNK	7	2	-0.54828			14874	14874	-0.131655	0.0107097	-0.0954222	-0.716892	-0.676177	-0.675473	0.000161467	0.617392	1.5341
A0A0N7KLY1	Os06g0286351	tr|A0A0N7KLY1|A0A0N7KLY1_ORYSJ;tr|Q5VMT5|Q5VMT5_ORYSJ	1063;1545	tr|A0A0N7KLY1|A0A0N7KLY1_ORYSJ	tr|A0A0N7KLY1|A0A0N7KLY1_ORYSJ	>tr|A0A0N7KLY1|A0A0N7KLY1_ORYSJ Os06g0286351 protein OS=Oryza sativa subsp. japonica OX=39947 GN=Os06g0286351 PE=4 SV=1;>tr|Q5VMT5|Q5VMT5_ORYSJ Os06g0286351 protein OS=Oryza sativa subsp. japonica OX=39947 GN=Os06g0286351 PE=2 SV=1	0.999887	1.84e-05	60.007	1	S	KEEEPDDHNLNSKEESDNETLSVWKKRTAKA	X;X;X;X;X;X;X;X;X;X;X;X;X;X;X;Phospho (STY);X;X;X;X;X;X;X;X;X;X;X;X;X;X;X	XXXXXXXXXXXXXPPPPPPPPPPPPXXXXXX	EES(1)DNETLSVWK	3	3	0.63191			3906	3906	-2.52409	-2.20075	-2.23777	-2.86492	-3.00648	-2.8775	0.00596969	0.595434	1.51093
Q6L561	Os05g0589600	tr|Q6L561|Q6L561_ORYSJ	35	tr|Q6L561|Q6L561_ORYSJ	tr|Q6L561|Q6L561_ORYSJ	>tr|Q6L561|Q6L561_ORYSJ Os05g0589600 protein OS=Oryza sativa subsp. japonica OX=39947 GN=Os05g0589600 PE=4 SV=1	1	0.00102896	80.492	1	S	HLIAAAEKKAAAAAASPKLASSPAPAPAKLP	X;X;X;X;X;X;X;X;X;X;X;X;X;X;X;Phospho (STY);X;X;X;X;Phospho (STY);Phospho (STY);X;X;X;X;X;X;X;X;X	XXXXXXXXPPPPPPPPPPXXXXXXXXXXXXX	KAAAAAAS(1)PK	8	3	-0.34157			0;1;2;3;4;5;8905;8906;8907;8908	8908	2.6765	2.63344	2.64129	3.3179	3.22704	3.29714	3.24331e-05	-0.630286	0.646049
Q2QT46	LOC_Os12g21890	tr|Q2QT46|Q2QT46_ORYSJ	121	tr|Q2QT46|Q2QT46_ORYSJ	tr|Q2QT46|Q2QT46_ORYSJ	>tr|Q2QT46|Q2QT46_ORYSJ Os12g0407500 protein OS=Oryza sativa subsp. japonica OX=39947 GN=LOC_Os12g21890 PE=2 SV=1	0.997635	0.000216584	53.796	2	S	KNTFSRLTSGLGLRLSPKGPQQDESAEGSTT	X;X;X;X;X;X;X;X;Phospho (STY);X;X;X;X;X;X;Phospho (STY);X;X;X;X;X;X;X;X;X;X;X;X;X;X;Phospho (STY)	XXXXXXPPPPPPPPPPPPXXXXXXXXXXXXX	LT(0.204)S(0.798)GLGLRLS(0.998)PK	10	3	0.094292			11133	11133	-2.08037	-1.98739	-2.26308	-1.38159	-1.43915	-1.48619	0.00145437	-0.674634	0.626491
Q5ZDX7	Os01g0614700	tr|Q5ZDX7|Q5ZDX7_ORYSJ	221	tr|Q5ZDX7|Q5ZDX7_ORYSJ	tr|Q5ZDX7|Q5ZDX7_ORYSJ	>tr|Q5ZDX7|Q5ZDX7_ORYSJ Os01g0614700 protein OS=Oryza sativa subsp. japonica OX=39947 GN=Os01g0614700 PE=2 SV=1	0.999989	1.01e-21	106.01	2	S	SKEAPVSLKLPPPPPSPVSPTDSGIAASPFK	X;X;X;X;X;X;X;X;X;X;X;X;X;X;X;Phospho (STY);X;X;Phospho (STY);X;X;X;X;X;X;X;X;X;X;X;X	XXXXXXXXXPPPPPPPPPPPPPPPPPPPPPP	LPPPPPS(1)PVS(0.998)PT(0.002)DSGIAASPFK	7	3	0.4824			10731;10732;10733;10734;10735;10736;10737;10738;10739;10740;10741;10742;10743;10744;10745;10746;10747	10741	1.32884	1.34519	1.33876	2.02313	2.01878	2.08839	6.72976e-06	-0.705836	0.613087
Q7XXS2	LOC_Os03g23010	tr|Q7XXS2|Q7XXS2_ORYSJ	120	tr|Q7XXS2|Q7XXS2_ORYSJ	tr|Q7XXS2|Q7XXS2_ORYSJ	>tr|Q7XXS2|Q7XXS2_ORYSJ 17.7 kDa low temperature induced protein OS=Oryza sativa subsp. japonica OX=39947 GN=LOC_Os03g23010 PE=2 SV=1	0.999978	0.00174091	73.176	1	S	AALKTDAVLKALSLVSPKGGDAPRGLREKPR	X;X;X;X;X;X;X;X;X;X;X;X;X;X;X;Phospho (STY);X;X;X;X;X;X;X;X;X;X;X;X;X;X;X	XXXXXXXXXXPPPPPPPPXXXXXXXXXXXXX	ALSLVS(1)PK	6	3	-0.016091			1226;1228;1229;1230;1231	1229	1.59571	1.5945	1.55757	2.34517	2.33344	2.31323	1.13492e-06	-0.74802	0.59542
Q5W6X0	Os05g0316800	tr|Q5W6X0|Q5W6X0_ORYSJ	23	tr|Q5W6X0|Q5W6X0_ORYSJ	tr|Q5W6X0|Q5W6X0_ORYSJ	>tr|Q5W6X0|Q5W6X0_ORYSJ Os05g0316800 protein OS=Oryza sativa subsp. japonica OX=39947 GN=Os05g0316800 PE=2 SV=1	1	0.0465555	29.263	1	S	PADSLAAGRSRRVGASMPRPKRVRVYFVDAD	X;X;X;X;X;X;X;X;X;X;X;X;X;X;X;Phospho (STY);X;X;X;X;X;X;X;X;X;X;X;X;X;X;X	XXXXXXXXXXXXPPPPPPPXXXXXXXXXXXX	VGAS(1)MPR	4	2	-3.0825			18283;18284	18284	0.393246	0.337644	0.367281	1.11577	1.18632	1.08067	2.63161e-05	-0.761526	0.589872
A0A0P0VC18	Os01g0917400	tr|A0A0P0VC18|A0A0P0VC18_ORYSJ;tr|A0A0P0VC32|A0A0P0VC32_ORYSJ;sp|Q5JLB5|C3H12_ORYSJ	41;131;242	tr|A0A0P0VC18|A0A0P0VC18_ORYSJ	tr|A0A0P0VC18|A0A0P0VC18_ORYSJ	>tr|A0A0P0VC18|A0A0P0VC18_ORYSJ Os01g0917400 protein (Fragment) OS=Oryza sativa subsp. japonica OX=39947 GN=Os01g0917400 PE=4 SV=1;>tr|A0A0P0VC32|A0A0P0VC32_ORYSJ Os01g0917400 protein (Fragment) OS=Oryza sativa subsp. japonica OX=39947 GN=Os01g0917400 PE=4	0.999968	0.00788465	45.962	1	S	GTMASWAFPRGSFIPSPRWQNPSNYAPMIVP	X;X;X;X;X;X;X;X;X;X;X;X;X;X;X;Phospho (STY);X;X;X;X;X;X;X;X;X;X;X;X;X;X;X	XXXXXXXXXXPPPPPPPPXXXXXXXXXXXXX	GSFIPS(1)PR	6	2	2.666			7353;7354;7355	7355	0.506814	0.585858	0.540243	1.32998	1.31024	1.31402	5.24233e-06	-0.773776	0.584885
Q8H5M0	Os07g0585000	tr|Q8H5M0|Q8H5M0_ORYSJ	434	tr|Q8H5M0|Q8H5M0_ORYSJ	tr|Q8H5M0|Q8H5M0_ORYSJ	>tr|Q8H5M0|Q8H5M0_ORYSJ Os07g0585000 protein OS=Oryza sativa subsp. japonica OX=39947 GN=Os07g0585000 PE=2 SV=1	1	0.000496265	47.669	1	S	AAAAAKKPMAGGPEKSPKVFYGSRAFF____	X;X;X;X;X;X;X;X;X;X;X;X;X;X;X;Phospho (STY);X;X;X;X;X;X;X;X;X;X;X;X;X;X;X	XXXXXXPPPPPPPPPPPPXXXXXXXXXXXXX	KPMAGGPEKS(1)PK	10	4	-0.70587			9325;9326	9326	0.595848	0.632438	0.637802	1.48455	1.33806	1.44612	6.27386e-05	-0.800882	0.573998
A0A0P0UZB5	Os01g0199700	tr|A0A0P0UZB5|A0A0P0UZB5_ORYSJ	45	tr|A0A0P0UZB5|A0A0P0UZB5_ORYSJ	tr|A0A0P0UZB5|A0A0P0UZB5_ORYSJ	>tr|A0A0P0UZB5|A0A0P0UZB5_ORYSJ Os01g0199700 protein OS=Oryza sativa subsp. japonica OX=39947 GN=Os01g0199700 PE=4 SV=1	1	0.000182232	61.282	1	S	EKPRRISMEGLQRAMSDLALELTKKQQVADA	X;X;X;X;X;X;X;X;X;X;X;X;X;X;X;Phospho (STY);X;X;X;X;X;X;X;X;X;X;X;X;X;X;X	XXXXXXXXXXXXXPPPPPPPPPPPXXXXXXX	AMS(1)DLALELTK	3	3	0.30456			1346;1347;1348	1347	-2.77452	-2.65462	-3.03044	-1.98469	-1.74736	-1.98749	0.00259081	-0.91335	0.530951
Q0DK70	Os05g0188100	tr|Q0DK70|Q0DK70_ORYSJ	26	tr|Q0DK70|Q0DK70_ORYSJ	tr|Q0DK70|Q0DK70_ORYSJ	>tr|Q0DK70|Q0DK70_ORYSJ Os05g0188100 protein OS=Oryza sativa subsp. japonica OX=39947 GN=Os05g0188100 PE=2 SV=1	0.867401	0.000685121	58.309	1	S	RNPHKAPADYRSDRKSASGMSGEPKKGGRGG	X;X;X;X;X;X;X;X;X;X;X;X;X;X;X;Phospho (STY);X;X;X;X;X;X;X;X;X;X;X;X;X;X;X	XXXXXXXXXXXXXXXPPPPPPPPPPXXXXXX	S(0.867)AS(0.125)GMS(0.007)GEPK	1	2	-0.29418			14197	14197	-1.0436	-0.928777	-1.11326	-0.0532039	-0.102265	-0.0430237	7.11892e-05	-0.96238	0.513209
Q75LR5	LOC_Os03g27260	tr|Q75LR5|Q75LR5_ORYSJ	243	tr|Q75LR5|Q75LR5_ORYSJ	tr|Q75LR5|Q75LR5_ORYSJ	>tr|Q75LR5|Q75LR5_ORYSJ 40S ribosomal protein S6 OS=Oryza sativa subsp. japonica OX=39947 GN=LOC_Os03g27260 PE=2 SV=1	0.847101	0.00531618	51.006	1	T	RSESLAKRRSKLSAATTA_____________	X;Phospho (STY);X;Phospho (STY);X;X;X;X;X;X;X;X;X;X;X;Phospho (STY);X;X;X;X;X;X;X;X;X;X;X;X;X;X;X	XXXXXXXXXPPPPPPPPPXXXXXXXXXXXXX	SKLS(0.004)AAT(0.847)T(0.148)A	7	2	-0.33282			15002;15003;15005	15002	0.565118	0.626532	0.554489	1.81849	1.69592	1.7446	9.95463e-06	-1.17096	0.444127
Q75LR5	LOC_Os03g27260	tr|Q75LR5|Q75LR5_ORYSJ;tr|Q8LH97|Q8LH97_ORYSJ	231;231	tr|Q75LR5|Q75LR5_ORYSJ;tr|Q8LH97|Q8LH97_ORYSJ	tr|Q8LH97|Q8LH97_ORYSJ	>tr|Q75LR5|Q75LR5_ORYSJ 40S ribosomal protein S6 OS=Oryza sativa subsp. japonica OX=39947 GN=LOC_Os03g27260 PE=2 SV=1;>tr|Q8LH97|Q8LH97_ORYSJ 40S ribosomal protein S6 OS=Oryza sativa subsp. japonica OX=39947 GN=Os07g0622100 PE=2 SV=1	1	0.0029236	37.715	1;2	S	LLAQRLKEQRERRSESLAKRRSKLSAATTA_;LLAQRLKEQRERRSESLAKRRSKLSSAAKAA	X;X;X;X;X;X;X;X;X;X;X;X;X;Phospho (STY);X;Phospho (STY);X;X;X;X;X;Phospho (STY);X;X;Phospho (STY);Phospho (STY);X;Phospho (STY);X;X;X	XXXXXXXXXXPPPPPPPPPXXXXXXXXXXXX	ERRS(1)ES(1)LAK	6	3	-0.70029			4825;13800;13801;13802;13803;13804;13805;13806;13807;13808;13809	4825	2.96464	2.96232	2.81818	4.4219	4.32352	4.3717	1.30924e-05	-1.45732	0.364168
A0A0P0X4N7	Os07g0243150	tr|A0A0P0X4N7|A0A0P0X4N7_ORYSJ	74	tr|A0A0P0X4N7|A0A0P0X4N7_ORYSJ	tr|A0A0P0X4N7|A0A0P0X4N7_ORYSJ	>tr|A0A0P0X4N7|A0A0P0X4N7_ORYSJ Os07g0243150 protein (Fragment) OS=Oryza sativa subsp. japonica OX=39947 GN=Os07g0243150 PE=4 SV=1	0.991758	0.000961635	53.451	1	T	LNKVEEKAPAAASRATKASGAPAKKAAGDGD	X;X;X;X;X;X;X;X;X;X;X;X;X;X;X;Phospho (STY);X;X;X;X;X;X;X;X;X;X;X;X;X;X;X	XXXXXXXXXXXXXXPPPPPPPPPPXXXXXXX	AT(0.992)KAS(0.008)GAPAK	2	3	0.093655			2024;2025;2026	2025	0.856764	0.93531	0.835322	2.42907	2.31949	2.32874	5.71723e-06	-1.4833	0.35767
Q8LH97	Os07g0622100	tr|Q8LH97|Q8LH97_ORYSJ	237	tr|Q8LH97|Q8LH97_ORYSJ	tr|Q8LH97|Q8LH97_ORYSJ	>tr|Q8LH97|Q8LH97_ORYSJ 40S ribosomal protein S6 OS=Oryza sativa subsp. japonica OX=39947 GN=Os07g0622100 PE=2 SV=1	0.999983	0.00195961	55.133	1;2	S	KEQRERRSESLAKRRSKLSSAAKAAATTA__	X;X;X;X;X;X;X;Phospho (STY);X;Phospho (STY);X;X;X;X;X;Phospho (STY);X;X;Phospho (STY);X;X;X;X;X;X;X;X;X;X;X;X	XXXXXXXXXXXXXXXPPPPPPPPXXXXXXXX	S(1)KLS(0.951)S(0.049)AAK	1	3	-0.24584			15008;15014;15015;15016;15017;15018;15019;15020	15017	2.238	2.03181	1.9124	3.50612	3.79373	3.43589	0.000470804	-1.51784	0.349208
Q8LH97	Os07g0622100	tr|Q8LH97|Q8LH97_ORYSJ	240	tr|Q8LH97|Q8LH97_ORYSJ	tr|Q8LH97|Q8LH97_ORYSJ	>tr|Q8LH97|Q8LH97_ORYSJ 40S ribosomal protein S6 OS=Oryza sativa subsp. japonica OX=39947 GN=Os07g0622100 PE=2 SV=1	0.951491	0.00195961	47.135	1;2	S	RERRSESLAKRRSKLSSAAKAAATTA_____	X;X;X;X;Phospho (STY);X;Phospho (STY);X;X;X;X;X;Phospho (STY);X;X;Phospho (STY);X;X;X;X;X;X;X;X;X;X;X;X;X;X;X	XXXXXXXXXXXXPPPPPPPPXXXXXXXXXXX	S(1)KLS(0.951)S(0.049)AAK	4	3	-0.24584			15006;15009;15010;15011;15012;15013;15015;15016;15017;15018;15019;15020	15017	2.8962	2.77466	2.67157	4.35496	4.47263	4.27754	5.11438e-05	-1.58756	0.332733
Q5JMS3	Os01g0964000	tr|Q5JMS3|Q5JMS3_ORYSJ;tr|Q5N9F2|Q5N9F2_ORYSJ	185;187	tr|Q5JMS3|Q5JMS3_ORYSJ	tr|Q5JMS3|Q5JMS3_ORYSJ	>tr|Q5JMS3|Q5JMS3_ORYSJ Os01g0964000 protein OS=Oryza sativa subsp. japonica OX=39947 GN=Os01g0964000 PE=2 SV=1;>tr|Q5N9F2|Q5N9F2_ORYSJ Os01g0866300 protein OS=Oryza sativa subsp. japonica OX=39947 GN=Os01g0866300 PE=2 SV=1	1	0.000208361	63.677	1	S	HKTIDSVLSRGERLDSLVEKSSDLSAASQMF	X;X;X;X;X;X;X;X;Phospho (STY);X;X;X;X;X;X;Phospho (STY);X;X;X;X;X;X;X;X;X;X;X;X;X;X;X	XXXXXXXXXXPPPPPPPPPPXXXXXXXXXXX	LDS(1)LVEK	3	2	-0.79883			6211;6212;9911;9912;9913	9913	1.38608	1.30808	1.33538	1.90836	2.04466	1.83358	0.00088468	-0.585685	0.666333
Q10DR8	LOC_Os03g51250	tr|Q10DR8|Q10DR8_ORYSJ	325	tr|Q10DR8|Q10DR8_ORYSJ	tr|Q10DR8|Q10DR8_ORYSJ	>tr|Q10DR8|Q10DR8_ORYSJ Adenylyl cyclase-associated protein OS=Oryza sativa subsp. japonica OX=39947 GN=LOC_Os03g51250 PE=2 SV=1	0.993628	0.0090925	34.574	1	S	TAAPAAAPEKTSRAGSFSFKSGPPKLELQMG	X;X;X;X;X;X;X;X;X;X;X;X;X;X;X;Phospho (STY);X;X;X;X;X;X;X;X;X;X;X;X;X;X;X	XXXXXXXXXXXXXPPPPPPPXXXXXXXXXXX	AGS(0.994)FS(0.006)FK	3	3	-0.40667			818;819;820;821;822;823;824;825	819	3.43683	3.48739	3.47581	4.11123	4.01824	4.02866	6.01494e-05	-0.586031	0.666173
Q339A6	LOC_Os10g22950	tr|Q339A6|Q339A6_ORYSJ	962	tr|Q339A6|Q339A6_ORYSJ	tr|Q339A6|Q339A6_ORYSJ	>tr|Q339A6|Q339A6_ORYSJ Anther ethylene-upregulated protein ER1, putative, expressed OS=Oryza sativa subsp. japonica OX=39947 GN=LOC_Os10g22950 PE=3 SV=1	0.993711	5.22e-05	77.386	1	S	KQTEERLQKALARVKSMVQYPEARDQYQRIL	X;X;X;X;X;X;X;X;X;X;X;X;X;X;X;Phospho (STY);X;X;X;X;X;X;X;X;X;X;X;X;X;X;X	XXXXXXXXXXXXXPPPPPPPPPPPXXXXXXX	VKS(0.994)MVQY(0.006)PEAR	3	2	-2.2037			18543;18544;18545;18546	18545	0.487189	0.4086	0.393432	1.05508	0.986951	1.01057	7.58547e-05	-0.587794	0.665359
Q0IZR7	Os09g0553900	tr|Q0IZR7|Q0IZR7_ORYSJ	41	tr|Q0IZR7|Q0IZR7_ORYSJ	tr|Q0IZR7|Q0IZR7_ORYSJ	>tr|Q0IZR7|Q0IZR7_ORYSJ Os09g0553900 protein OS=Oryza sativa subsp. japonica OX=39947 GN=Os09g0553900 PE=2 SV=1	0.920629	3.79e-12	101.63	1	S	HTNRRTASLALPRSASEVNGGGADVVRAESR	X;X;X;X;X;X;X;Phospho (STY);X;X;X;X;X;X;X;Phospho (STY);X;X;X;X;X;X;X;X;X;X;X;X;X;X;X	XXXXXXXXXXXXXPPPPPPPPPPPPPPXXXX	S(0.079)AS(0.921)EVNGGGADVVR	3	2	0.51009			14159;14160;14161	14161	0.655214	0.713011	0.673811	1.3014	1.25315	1.26888	1.15745e-05	-0.593795	0.662597
Q0IZR7	Os09g0553900	tr|Q0IZR7|Q0IZR7_ORYSJ	327	tr|Q0IZR7|Q0IZR7_ORYSJ	tr|Q0IZR7|Q0IZR7_ORYSJ	>tr|Q0IZR7|Q0IZR7_ORYSJ Os09g0553900 protein OS=Oryza sativa subsp. japonica OX=39947 GN=Os09g0553900 PE=2 SV=1	0.980511	6.88e-12	95.307	1;2;3	S	SLFARKQSKLSFSITSPKVSRSEPKLTPTKG	Phospho (STY);X;X;X;X;X;X;Phospho (STY);X;X;Phospho (STY);X;Phospho (STY);X;Phospho (STY);Phospho (STY);X;X;X;X;X;Phospho (STY);X;X;X;X;Phospho (STY);X;Phospho (STY);X;X	XXXXXPPPPPPPPPPPPPXXXXXXXXXXXXX	KQS(0.09)KLS(0.91)FS(0.81)IT(0.209)S(0.981)PK	11	4	-0.29487			9391;9393;9395;9396;9397;9398;9399;9400;9401;9402;9403;9404;9405;9406;9407;9409;10894;10895;10896;10897;10898;10899;10900;10901;10904;10906;10909;10910;10911;10912;10913;10914;10915;13167;13168;13169	9406	4.24972	4.24141	4.19911	4.92955	4.86715	4.87496	1.24261e-05	-0.660474	0.63267
Q5Z9P6	Os06g0715500	tr|Q5Z9P6|Q5Z9P6_ORYSJ	253	tr|Q5Z9P6|Q5Z9P6_ORYSJ	tr|Q5Z9P6|Q5Z9P6_ORYSJ	>tr|Q5Z9P6|Q5Z9P6_ORYSJ Signal sequence receptor subunit alpha OS=Oryza sativa subsp. japonica OX=39947 GN=Os06g0715500 PE=2 SV=1	0.851659	8.26e-48	192.8	1	S	MDEWLEGTAFAQGSKSKKKK___________	X;X;X;X;X;X;X;X;X;X;X;X;X;X;X;Phospho (STY);X;X;X;X;X;X;X;X;X;X;X;X;X;X;X	PPPPPPPPPPPPPPPPPXXXXXXXXXXXXXX	VELGTGTTDANMDEWLEGT(0.003)AFAQGS(0.146)KS(0.852)K	27	4	-0.11051			18180;18181	18181	-1.13486	-0.946131	-1.21128	-0.476648	-0.413307	-0.367929	0.00133009	-0.67813	0.624975
Q0IZR7	Os09g0553900	tr|Q0IZR7|Q0IZR7_ORYSJ	33	tr|Q0IZR7|Q0IZR7_ORYSJ	tr|Q0IZR7|Q0IZR7_ORYSJ	>tr|Q0IZR7|Q0IZR7_ORYSJ Os09g0553900 protein OS=Oryza sativa subsp. japonica OX=39947 GN=Os09g0553900 PE=2 SV=1	0.991885	0.00275979	43.434	1	S	LSHTLYQAHTNRRTASLALPRSASEVNGGGA	X;X;X;X;X;X;X;X;X;X;X;X;X;X;X;Phospho (STY);X;X;X;X;X;X;X;Phospho (STY);X;X;X;X;X;X;X	XXXXXXXXXXXXXPPPPPPPPXXXXXXXXXX	T(0.008)AS(0.992)LALPR	3	2	0.043023			16553;16554;16555;16556;16557;16558;16559	16556	1.06733	1.02251	0.98593	1.70168	1.77502	1.64977	9.39888e-05	-0.683564	0.622625
Q339A6	LOC_Os10g22950	tr|Q339A6|Q339A6_ORYSJ	379	tr|Q339A6|Q339A6_ORYSJ	tr|Q339A6|Q339A6_ORYSJ	>tr|Q339A6|Q339A6_ORYSJ Anther ethylene-upregulated protein ER1, putative, expressed OS=Oryza sativa subsp. japonica OX=39947 GN=LOC_Os10g22950 PE=3 SV=1	0.977189	0.000242555	44.117	2	S	FLKTQSSNLSDILKDSFKKSDSFTRWMSKEL	X;X;X;X;X;Phospho (STY);Phospho (STY);X;X;Phospho (STY);X;X;X;X;X;Phospho (STY);X;X;X;X;X;X;X;X;X;X;X;X;X;X;X	XXXPPPPPPPPPPPPPPPPXXXXXXXXXXXX	T(0.044)QS(0.193)S(0.154)NLS(0.632)DILKDS(0.977)FKK	13	4	0.32585			17337;17339	17339	-1.23503	-1.0605	-1.10757	-0.278342	-0.361571	-0.463805	0.00051118	-0.766462	0.587857
Q0IZR7	Os09g0553900	tr|Q0IZR7|Q0IZR7_ORYSJ	516	tr|Q0IZR7|Q0IZR7_ORYSJ	tr|Q0IZR7|Q0IZR7_ORYSJ	>tr|Q0IZR7|Q0IZR7_ORYSJ Os09g0553900 protein OS=Oryza sativa subsp. japonica OX=39947 GN=Os09g0553900 PE=2 SV=1	0.996806	0.00209651	41.067	2	S	LLEQGDGKATLAKSVSSLKSGAKRDTGGAAD	X;X;X;X;X;X;X;X;X;X;X;X;X;X;X;Phospho (STY);Phospho (STY);X;X;X;X;X;X;X;X;X;X;X;X;X;X	XXXXXXXXXXXXXPPPPPPPPPPXXXXXXXX	S(0.007)VS(0.997)S(0.992)LKS(0.004)GAK	3	3	0.28813			16272;16273	16272	-0.369701	-0.346156	-0.434074	0.501604	0.426366	0.387059	4.28183e-05	-0.821653	0.565793
Q0IZR7	Os09g0553900	tr|Q0IZR7|Q0IZR7_ORYSJ	517	tr|Q0IZR7|Q0IZR7_ORYSJ	tr|Q0IZR7|Q0IZR7_ORYSJ	>tr|Q0IZR7|Q0IZR7_ORYSJ Os09g0553900 protein OS=Oryza sativa subsp. japonica OX=39947 GN=Os09g0553900 PE=2 SV=1	0.993718	0.00209651	41.067	2	S	LEQGDGKATLAKSVSSLKSGAKRDTGGAADA	X;X;X;X;X;X;X;X;X;X;X;X;X;X;Phospho (STY);Phospho (STY);X;X;X;X;X;X;X;X;X;X;X;X;X;X;X	XXXXXXXXXXXXPPPPPPPPPPXXXXXXXXX	S(0.013)VS(0.988)S(0.994)LKS(0.005)GAK	4	3	-0.032488			16272;16273	16273	-0.369701	-0.346156	-0.434074	0.501604	0.426366	0.387059	4.28183e-05	-0.821653	0.565793
Q69IN8	Os09g0513000	tr|Q69IN8|Q69IN8_ORYSJ	16	tr|Q69IN8|Q69IN8_ORYSJ	tr|Q69IN8|Q69IN8_ORYSJ	>tr|Q69IN8|Q69IN8_ORYSJ Os09g0513000 protein OS=Oryza sativa subsp. japonica OX=39947 GN=Os09g0513000 PE=4 SV=1	0.98847	2.13e-05	77.692	1	S	MEDQKKNAKPEGSSGSQRGAPPAPDAGLPNP	X;X;X;X;X;X;X;X;X;X;X;X;X;X;X;Phospho (STY);X;X;X;X;X;X;X;X;X;X;X;X;X;X;X	XXXXXXPPPPPPPPPPPPXXXXXXXXXXXXX	NAKPEGS(0.001)S(0.01)GS(0.988)QR	10	3	-0.39388			11934;11935;11936;11937;11938;11939	11938	-0.472601	-0.303477	-0.350737	0.544792	0.311776	0.538574	0.000787088	-0.840652	0.558391
Q0DMP3	Os03g0800000	tr|Q0DMP3|Q0DMP3_ORYSJ;tr|Q851R0|Q851R0_ORYSJ	390;625	tr|Q0DMP3|Q0DMP3_ORYSJ	tr|Q0DMP3|Q0DMP3_ORYSJ	>tr|Q0DMP3|Q0DMP3_ORYSJ Os03g0800000 protein (Fragment) OS=Oryza sativa subsp. japonica OX=39947 GN=Os03g0800000 PE=4 SV=1;>tr|Q851R0|Q851R0_ORYSJ Nodulin family protein, putative, expressed OS=Oryza sativa subsp. japonica OX=39947 GN=LOC_Os03g58580 PE=4 S	0.999996	1.02e-07	90.294	1	S	DTAAEKRSTLVNDEDSKKG____________	X;X;X;X;X;X;X;X;X;X;X;X;X;X;X;Phospho (STY);X;X;X;X;X;X;X;X;X;X;X;X;X;X;X	XXXXXXXPPPPPPPPPPPPXXXXXXXXXXXX	STLVNDEDS(1)KKG	9	3	-2.243			16071;16072;16073	16071	0.741688	0.885266	0.776497	1.69176	1.63444	1.61376	6.6913e-05	-0.845501	0.556517
Q6Z3Y9	Os07g0694000	tr|Q6Z3Y9|Q6Z3Y9_ORYSJ	273	tr|Q6Z3Y9|Q6Z3Y9_ORYSJ	tr|Q6Z3Y9|Q6Z3Y9_ORYSJ	>tr|Q6Z3Y9|Q6Z3Y9_ORYSJ Phosphoinositide phospholipase C OS=Oryza sativa subsp. japonica OX=39947 GN=Os07g0694000 PE=2 SV=1	1	1.58e-07	99.37	1	T	KPPREYLQAKDGNAATIKEDAKAAATDDAAW	X;X;X;X;X;X;X;X;X;X;X;X;X;X;X;Phospho (STY);X;X;X;X;X;X;X;X;X;X;X;X;X;X;X	XXXXXXXXXXPPPPPPPPPPPPXXXXXXXXX	DGNAAT(1)IKEDAK	6	2	0.59191			2848;2849;2850;2851;2852;2853	2853	1.42222	1.53706	1.48943	2.45874	2.39532	2.43187	1.55458e-05	-0.945741	0.519163
Q0IZR7	Os09g0553900	tr|Q0IZR7|Q0IZR7_ORYSJ	104	tr|Q0IZR7|Q0IZR7_ORYSJ	tr|Q0IZR7|Q0IZR7_ORYSJ	>tr|Q0IZR7|Q0IZR7_ORYSJ Os09g0553900 protein OS=Oryza sativa subsp. japonica OX=39947 GN=Os09g0553900 PE=2 SV=1	0.984731	2.67e-26	168.64	1	S	DDGDKGARRAPSKSQSFAAVTTPGGEAAAVA	X;X;X;X;X;X;X;X;X;X;X;X;X;X;X;Phospho (STY);X;X;X;X;X;X;X;X;X;X;X;X;X;X;X	XXXXXXXXXXXXXPPPPPPPPPPPPPPPPPP	S(0.015)QS(0.985)FAAVT(0.001)TPGGEAAAVAGEK	3	2	0.13492			15593;15594;15596;15598;15599;15600;15603;15604;15605	15600	2.58162	2.68478	2.55343	3.60745	3.51387	3.54194	4.07873e-05	-0.947809	0.518419
Q0IZR7	Os09g0553900	tr|Q0IZR7|Q0IZR7_ORYSJ	326	tr|Q0IZR7|Q0IZR7_ORYSJ	tr|Q0IZR7|Q0IZR7_ORYSJ	>tr|Q0IZR7|Q0IZR7_ORYSJ Os09g0553900 protein OS=Oryza sativa subsp. japonica OX=39947 GN=Os09g0553900 PE=2 SV=1	0.88109	2.04e-07	84.433	1;2;3	T	SSLFARKQSKLSFSITSPKVSRSEPKLTPTK	X;Phospho (STY);X;X;X;X;X;X;Phospho (STY);X;X;Phospho (STY);X;Phospho (STY);X;Phospho (STY);Phospho (STY);X;X;X;X;X;Phospho (STY);X;X;X;X;Phospho (STY);X;Phospho (STY);X	XXXXXXPPPPPPPPPPPPPXXXXXXXXXXXX	KQS(0.993)KLS(0.988)FS(0.026)IT(0.881)S(0.112)PK	10	3	0.30915			9390;9396;9397;9398;9399;9400;9401;9404;9408;9410;10902;10903;10907;10908;10910;10911;13170	9410	2.69804	2.63578	2.59315	3.61541	3.57102	3.5945	8.66641e-06	-0.951319	0.517159
A0A0P0VM23	Os02g0615800	tr|A0A0P0VM23|A0A0P0VM23_ORYSJ;tr|Q6K7X0|Q6K7X0_ORYSJ	284;662	tr|A0A0P0VM23|A0A0P0VM23_ORYSJ	tr|A0A0P0VM23|A0A0P0VM23_ORYSJ	>tr|A0A0P0VM23|A0A0P0VM23_ORYSJ Os02g0615800 protein (Fragment) OS=Oryza sativa subsp. japonica OX=39947 GN=Os02g0615800 PE=4 SV=1;>tr|Q6K7X0|Q6K7X0_ORYSJ Os02g0615800 protein OS=Oryza sativa subsp. japonica OX=39947 GN=Os02g0615800 PE=4 SV=1	0.999564	3.36e-08	148.35	1	S	LLEKMKPREKYISSQSFGENFLKVSYNDLAQ	X;X;X;X;X;X;X;X;X;X;X;X;X;X;X;Phospho (STY);X;X;X;X;X;X;X;X;X;X;X;X;X;X;X	XXXXXXXXXXPPPPPPPPPPPPPXXXXXXXX	YISSQS(1)FGENFLK	6	2	-0.30004			19865;19866;19867;19868;19869;19870;19871;19872;19873;19874;19875	19875	1.51703	1.60588	1.52111	2.53185	2.4822	2.54283	9.42347e-06	-0.970952	0.510169
Q0IZR7	Os09g0553900	tr|Q0IZR7|Q0IZR7_ORYSJ	322	tr|Q0IZR7|Q0IZR7_ORYSJ	tr|Q0IZR7|Q0IZR7_ORYSJ	>tr|Q0IZR7|Q0IZR7_ORYSJ Os09g0553900 protein OS=Oryza sativa subsp. japonica OX=39947 GN=Os09g0553900 PE=2 SV=1	0.993983	1.33e-08	113.32	2;3	S	SSSSSSLFARKQSKLSFSITSPKVSRSEPKL	X;Phospho (STY);Phospho (STY);Phospho (STY);X;Phospho (STY);X;X;X;X;X;X;Phospho (STY);X;X;Phospho (STY);X;Phospho (STY);X;Phospho (STY);Phospho (STY);X;X;X;X;X;Phospho (STY);X;X;X;X	XXXXXXXXXXPPPPPPPPPPPPPXXXXXXXX	KQS(0.006)KLS(0.994)FS(0.537)IT(0.537)S(0.926)PK	6	3	-0.49024			9390;9394;9396;9397;9398;9399;9404;9405;9406;9407;9408;9409;9410;13167;13168;13169;13170	9404	2.77342	2.73237	2.71004	3.75752	3.70967	3.72254	1.86493e-06	-0.991297	0.503025
Q0IZR7	Os09g0553900	tr|Q0IZR7|Q0IZR7_ORYSJ	324	tr|Q0IZR7|Q0IZR7_ORYSJ	tr|Q0IZR7|Q0IZR7_ORYSJ	>tr|Q0IZR7|Q0IZR7_ORYSJ Os09g0553900 protein OS=Oryza sativa subsp. japonica OX=39947 GN=Os09g0553900 PE=2 SV=1	0.963618	1.33e-08	113.32	1;2;3	S	SSSSLFARKQSKLSFSITSPKVSRSEPKLTP	Phospho (STY);Phospho (STY);X;Phospho (STY);X;X;X;X;X;X;Phospho (STY);X;X;Phospho (STY);X;Phospho (STY);X;Phospho (STY);Phospho (STY);X;X;X;X;X;Phospho (STY);X;X;X;X;Phospho (STY);X	XXXXXXXXPPPPPPPPPPPPPXXXXXXXXXX	KQS(0.029)KLS(0.973)FS(0.964)IT(0.167)S(0.867)PK	8	3	-0.37027			9393;9402;9403;9404;9406;9407;9408;9409;10905;10907;10908;10909;10910;10911;10912;10913;10914;10915	9409	2.81479	2.83326	2.73288	3.89685	3.80645	3.81122	1.64045e-05	-1.04453	0.484803
Q6ES98	Os09g0346700	tr|Q6ES98|Q6ES98_ORYSJ	126	tr|Q6ES98|Q6ES98_ORYSJ	tr|Q6ES98|Q6ES98_ORYSJ	>tr|Q6ES98|Q6ES98_ORYSJ Os09g0346700 protein OS=Oryza sativa subsp. japonica OX=39947 GN=Os09g0346700 PE=2 SV=1	0.809186	4.41e-05	49.986	1	S	AASKMKKALGLRSSASSKGGSPGSGGGGKSV	X;X;X;X;X;X;X;X;X;X;X;X;X;X;X;Phospho (STY);X;X;X;X;Phospho (STY);X;X;X;X;X;X;X;X;X;X	XXXXXXXXXXXXPPPPPPPPPPPPPPPPPXX	S(0.024)S(0.082)AS(0.809)S(0.081)KGGS(0.004)PGSGGGGK	4	3	-0.94987			15663;15664;15665	15663	-0.808668	-0.780821	-0.909502	0.199554	0.251768	0.192081	1.74232e-05	-1.04746	0.483818
Q0IZR7	Os09g0553900	tr|Q0IZR7|Q0IZR7_ORYSJ	319	tr|Q0IZR7|Q0IZR7_ORYSJ	tr|Q0IZR7|Q0IZR7_ORYSJ	>tr|Q0IZR7|Q0IZR7_ORYSJ Os09g0553900 protein OS=Oryza sativa subsp. japonica OX=39947 GN=Os09g0553900 PE=2 SV=1	0.996516	7.61e-07	92.641	2;3	S	INSSSSSSSLFARKQSKLSFSITSPKVSRSE	X;X;X;X;Phospho (STY);Phospho (STY);Phospho (STY);X;Phospho (STY);X;X;X;X;X;X;Phospho (STY);X;X;Phospho (STY);X;Phospho (STY);X;Phospho (STY);Phospho (STY);X;X;X;X;X;Phospho (STY);X	XXXXXXXXXXXXXPPPPPPPPPPPPPXXXXX	KQS(0.997)KLS(0.546)FS(0.396)IT(0.118)S(0.944)PK	3	4	-2.3147			9392;9394;9400;9401;9402;9403;9405;9410	9405	1.65567	1.70056	1.60173	2.73993	2.64844	2.71663	1.20945e-05	-1.04901	0.483299
Q5JN42	PSD2	sp|Q5JN42|PSD2_ORYSJ	56	sp|Q5JN42|PSD2_ORYSJ	sp|Q5JN42|PSD2_ORYSJ	>sp|Q5JN42|PSD2_ORYSJ Phosphatidylserine decarboxylase proenzyme 2 OS=Oryza sativa subsp. japonica OX=39947 GN=PSD2 PE=3 SV=3	0.97846	2.86e-15	100.72	1	S	RDRAGRPGGDAHASESGTGRAIAVDEFAGIA	X;X;X;X;X;X;X;X;X;X;X;X;X;X;X;Phospho (STY);X;X;X;X;X;X;X;X;X;X;X;X;X;X;X	XXXPPPPPPPPPPPPPPPPPXXXXXXXXXXX	AGRPGGDAHAS(0.006)ES(0.978)GT(0.015)GR	13	3	0.23988			794;795;796;797	794	-4.00944	-3.66331	-3.29828	-1.72029	-1.56002	-1.59905	0.000650843	-2.03056	0.24476

## Sheet: SUPPLEMENTARY TABLE 5-2
SUPPLEMENTARY TABLE 5-2 Phosphopeptides showed significantly different level in ZmPP2C26S-OE and shared by ZmPP2C26L-OE in comparison to WT.
Accession	Gene Name	Proteins	Positions within proteins	Leading proteins	Protein	Fasta headers	Localization prob	PEP	Delta score	Number of Phospho (STY)	Amino acid	Sequence window	Modification window	Peptide window coverage	Phospho (STY) Probabilities	Position in peptide	Charge	Mass error [ppm]	Reverse	Potential contaminant	MS/MS IDs	Best localization MS/MS ID	S-1	S-2	S-3	Nip-1	Nip-2	Nip-3	P-value	log2(FC)	FC
Q651D5	PIP2-7	sp|Q651D5|PIP27_ORYSJ	282	sp|Q651D5|PIP27_ORYSJ	sp|Q651D5|PIP27_ORYSJ	>sp|Q651D5|PIP27_ORYSJ Probable aquaporin PIP2-7 OS=Oryza sativa subsp. japonica OX=39947 GN=PIP2-7 PE=2 SV=2	0.892322	5.96e-05	68.29	2	S	YHKLVLRGEAAKALSSFRSTSVTA_______	X;X;X;X;X;X;X;X;X;X;X;X;X;X;X;Phospho (STY);X;X;Phospho (STY);Phospho (STY);Phospho (STY);X;X;X;X;X;X;X;X;X;X	XXXXXXXXXXXXPPPPPPPPPPPPXXXXXXX	ALS(0.101)S(0.892)FRS(0.081)T(0.424)S(0.187)VT(0.315)A	4	2	-1.1318			1247;1248;1249;1250;1251;1252	1252	1.40216	1.38722	1.30389	0.540436	0.69435	0.66101	0.00019527	0.732491	1.6615
Q651D5	PIP2-7	sp|Q651D5|PIP27_ORYSJ	285	sp|Q651D5|PIP27_ORYSJ	sp|Q651D5|PIP27_ORYSJ	>sp|Q651D5|PIP27_ORYSJ Probable aquaporin PIP2-7 OS=Oryza sativa subsp. japonica OX=39947 GN=PIP2-7 PE=2 SV=2	0.827705	7.43e-06	79.614	1	S	LVLRGEAAKALSSFRSTSVTA__________	X;X;X;X;X;X;X;X;X;X;X;X;Phospho (STY);X;X;Phospho (STY);X;X;X;X;X;X;X;X;X;X;X;X;X;X;X	XXXXXXXXXPPPPPPPPPPPPXXXXXXXXXX	ALSS(0.003)FRS(0.828)T(0.149)S(0.016)VT(0.004)A	7	2	0.56226			1242;1243;1244;1245;1246	1242	1.31501	1.42198	1.42209	0.721851	0.702323	0.67891	5.42543e-05	0.685333	1.60807
Q75IQ9	Os05g0164100	tr|Q75IQ9|Q75IQ9_ORYSJ;tr|Q0DKG9|Q0DKG9_ORYSJ	284;284	tr|Q75IQ9|Q75IQ9_ORYSJ	tr|Q75IQ9|Q75IQ9_ORYSJ	>tr|Q75IQ9|Q75IQ9_ORYSJ Os05g0164100 protein OS=Oryza sativa subsp. japonica OX=39947 GN=Os05g0164100 PE=4 SV=1;>tr|Q0DKG9|Q0DKG9_ORYSJ Os05g0164100 protein OS=Oryza sativa subsp. japonica OX=39947 GN=Os05g0164100 PE=4 SV=1	0.82224	2.41e-05	65.116	1	S	DHNNCNKDNVALPSDSFKKLQVSGIVESKSV	X;X;X;X;X;X;X;X;X;X;X;X;X;X;X;Phospho (STY);X;X;X;X;X;X;X;X;X;X;X;X;X;Phospho (STY);X	XXXXXXXPPPPPPPPPPPPXXXXXXXXXXXX	DNVALPS(0.178)DS(0.822)FKK	9	3	-0.32377			3240;3243	3243	2.37927	2.3916	2.42493	1.83515	1.68801	1.73776	0.000141492	0.644958	1.56369
Q7XWP1	Os04g0252200	sp|Q7XWP1|CPSF1_ORYSJ	477	sp|Q7XWP1|CPSF1_ORYSJ	sp|Q7XWP1|CPSF1_ORYSJ	>sp|Q7XWP1|CPSF1_ORYSJ Probable cleavage and polyadenylation specificity factor subunit 1 OS=Oryza sativa subsp. japonica OX=39947 GN=Os04g0252200 PE=3 SV=2	0.98626	1.67e-08	59.117	1	S	IEGDLPFSKRLKRIPSDVLQDVTSVEELSFQ	X;X;X;X;X;X;X;X;X;X;X;X;X;X;X;Phospho (STY);X;X;X;X;X;X;X;X;X;X;X;X;X;X;X	XXXXXXXXXXXXPPPPPPPPPPPPPPPPPPP	RIPS(0.986)DVLQDVT(0.007)S(0.007)VEELS(0.001)FQNIIAPNSLESAQK	4	4	-0.079942			13536;13537;13538	13536	-3.86853	-3.40655	-3.6669	-4.20809	-4.24296	-4.44424	0.0129932	0.651104	1.57037
A0A0N7KLY1	Os06g0286351	tr|A0A0N7KLY1|A0A0N7KLY1_ORYSJ;tr|Q5VMT5|Q5VMT5_ORYSJ	1063;1545	tr|A0A0N7KLY1|A0A0N7KLY1_ORYSJ	tr|A0A0N7KLY1|A0A0N7KLY1_ORYSJ	>tr|A0A0N7KLY1|A0A0N7KLY1_ORYSJ Os06g0286351 protein OS=Oryza sativa subsp. japonica OX=39947 GN=Os06g0286351 PE=4 SV=1;>tr|Q5VMT5|Q5VMT5_ORYSJ Os06g0286351 protein OS=Oryza sativa subsp. japonica OX=39947 GN=Os06g0286351 PE=2 SV=1	0.999887	1.84e-05	60.007	1	S	KEEEPDDHNLNSKEESDNETLSVWKKRTAKA	X;X;X;X;X;X;X;X;X;X;X;X;X;X;X;Phospho (STY);X;X;X;X;X;X;X;X;X;X;X;X;X;X;X	XXXXXXXXXXXXXPPPPPPPPPPPPXXXXXX	EES(1)DNETLSVWK	3	3	0.63191			3906	3906	-2.04466	-2.54696	-2.35235	-2.86492	-3.00648	-2.8775	0.0170918	0.601643	1.51744
A0A0P0WAD7	Os04g0423600	tr|A0A0P0WAD7|A0A0P0WAD7_ORYSJ	106	tr|A0A0P0WAD7|A0A0P0WAD7_ORYSJ	tr|A0A0P0WAD7|A0A0P0WAD7_ORYSJ	>tr|A0A0P0WAD7|A0A0P0WAD7_ORYSJ Os04g0423600 protein OS=Oryza sativa subsp. japonica OX=39947 GN=Os04g0423600 PE=3 SV=1	0.838287	1.39e-11	137.57	1	S	SGGGGYNKSGADDYSSSGGYSKSGTDNYSGS	Phospho (STY);X;X;X;X;X;X;X;X;X;X;X;X;X;X;Phospho (STY);X;X;X;X;X;X;X;X;X;X;X;X;Phospho (STY);X;Phospho (STY)	XXXXXXXXPPPPPPPPPPPPPPXXXXXXXXX	SGADDYS(0.094)S(0.838)S(0.068)GGYSK	8	2	0.088084			14595	14595	-0.503598	-0.535482	-0.542345	-1.33903	-1.35296	-1.31245	1.13152e-06	0.807669	1.75038
A0A0P0WAD7	Os04g0423600	tr|A0A0P0WAD7|A0A0P0WAD7_ORYSJ	121	tr|A0A0P0WAD7|A0A0P0WAD7_ORYSJ	tr|A0A0P0WAD7|A0A0P0WAD7_ORYSJ	>tr|A0A0P0WAD7|A0A0P0WAD7_ORYSJ Os04g0423600 protein OS=Oryza sativa subsp. japonica OX=39947 GN=Os04g0423600 PE=3 SV=1	0.799993	9.69e-11	80.041	1	S	SSGGYSKSGTDNYSGSGGYNKSGNNDYSGSG	Phospho (STY);X;X;X;X;X;X;X;X;X;X;X;X;X;X;Phospho (STY);X;X;X;X;X;X;X;X;X;X;X;X;X;X;X	XXXXXXXPPPPPPPPPPPPPPXXXXXXXXXX	SGT(0.006)DNYS(0.194)GS(0.8)GGYNK	9	2	0.0078907			14873	14873	-0.0210661	0.0574777	-0.0869501	-0.705536	-0.804071	-0.793991	0.000135401	0.75102	1.68298
Q6ZHS1	Os02g0188000	tr|Q6ZHS1|Q6ZHS1_ORYSJ	250	tr|Q6ZHS1|Q6ZHS1_ORYSJ	tr|Q6ZHS1|Q6ZHS1_ORYSJ	>tr|Q6ZHS1|Q6ZHS1_ORYSJ Glycosyltransferase OS=Oryza sativa subsp. japonica OX=39947 GN=Os02g0188000 PE=3 SV=1	0.768094	1.77e-10	60.521	1	S	ELERDVVDALRGVATSPPPPPLIPVGPLIEL	X;X;X;X;X;X;X;X;X;X;X;X;X;X;X;Phospho (STY);X;X;X;X;X;X;X;X;X;X;X;X;X;X;X	XXXXXXXXXXXPPPPPPPPPPPPPPPPPPPP	GVAT(0.232)S(0.768)PPPPPLIPVGPLIELEGDAAVR	5	3	-0.16303			7528;7529;7530	7529	-3.74486	-4.53074	-4.11923	-4.82639	-5.09904	-4.73556	0.039972	0.755384	1.68808
Q7G649	LOC_Os10g18340	tr|Q7G649|Q7G649_ORYSJ	31	tr|Q7G649|Q7G649_ORYSJ	tr|Q7G649|Q7G649_ORYSJ	>tr|Q7G649|Q7G649_ORYSJ Expressed protein OS=Oryza sativa subsp. japonica OX=39947 GN=LOC_Os10g18340 PE=2 SV=1	1	0.0275677	17.761	1	S	GKVVAEATMSVFQQKSVEGVDKKEVAGAAAD	X;X;X;X;X;X;X;X;X;X;X;X;X;X;X;Phospho (STY);X;X;X;X;X;X;X;X;X;X;X;X;X;X;X	XXXXXXXXXXXXXXXPPPPPPPPXXXXXXXX	S(1)VEGVDKK	1	2	-0.32865			16185;16186;16187	16187	1.61163	1.58161	1.56085	0.725053	0.617501	0.680969	1.22949e-05	0.91019	1.87929
Q7X8A1	Os04g0459500	tr|Q7X8A1|Q7X8A1_ORYSJ	116	tr|Q7X8A1|Q7X8A1_ORYSJ	tr|Q7X8A1|Q7X8A1_ORYSJ	>tr|Q7X8A1|Q7X8A1_ORYSJ Glyceraldehyde-3-phosphate dehydrogenase OS=Oryza sativa subsp. japonica OX=39947 GN=Os04g0459500 PE=2 SV=1	0.8144	8.83e-21	92.066	1	S	DTGGVKQASHLLKYDSTLGIFDADVKPVGDN	X;X;X;X;X;X;X;X;X;X;X;X;X;X;X;Phospho (STY);X;X;X;X;X;X;X;X;X;X;X;X;X;X;X	XXXXXXXXXXXXXPPPPPPPPPPPPPPPPPP	YDS(0.814)T(0.185)LGIFDADVKPVGDNAISVDGK	3	3	-0.073306			19708	19708	-1.50791	-1.53447	-1.5851	-2.18235	-2.15117	-2.16408	1.3899e-05	0.623371	1.54047
A0A0P0VC18	Os01g0917400	tr|A0A0P0VC18|A0A0P0VC18_ORYSJ;tr|A0A0P0VC32|A0A0P0VC32_ORYSJ;sp|Q5JLB5|C3H12_ORYSJ	41;131;242	tr|A0A0P0VC18|A0A0P0VC18_ORYSJ	tr|A0A0P0VC18|A0A0P0VC18_ORYSJ	>tr|A0A0P0VC18|A0A0P0VC18_ORYSJ Os01g0917400 protein (Fragment) OS=Oryza sativa subsp. japonica OX=39947 GN=Os01g0917400 PE=4 SV=1;>tr|A0A0P0VC32|A0A0P0VC32_ORYSJ Os01g0917400 protein (Fragment) OS=Oryza sativa subsp. japonica OX=39947 GN=Os01g0917400 PE=4	0.999968	0.00788465	45.962	1	S	GTMASWAFPRGSFIPSPRWQNPSNYAPMIVP	X;X;X;X;X;X;X;X;X;X;X;X;X;X;X;Phospho (STY);X;X;X;X;X;X;X;X;X;X;X;X;X;X;X	XXXXXXXXXXPPPPPPPPXXXXXXXXXXXXX	GSFIPS(1)PR	6	2	2.666			7353;7354;7355	7355	0.585465	0.681757	0.651191	1.32998	1.31024	1.31402	1.98923e-05	-0.67861	0.624767
A0A0P0UZB5	Os01g0199700	tr|A0A0P0UZB5|A0A0P0UZB5_ORYSJ	45	tr|A0A0P0UZB5|A0A0P0UZB5_ORYSJ	tr|A0A0P0UZB5|A0A0P0UZB5_ORYSJ	>tr|A0A0P0UZB5|A0A0P0UZB5_ORYSJ Os01g0199700 protein OS=Oryza sativa subsp. japonica OX=39947 GN=Os01g0199700 PE=4 SV=1	1	0.000182232	61.282	1	S	EKPRRISMEGLQRAMSDLALELTKKQQVADA	X;X;X;X;X;X;X;X;X;X;X;X;X;X;X;Phospho (STY);X;X;X;X;X;X;X;X;X;X;X;X;X;X;X	XXXXXXXXXXXXXPPPPPPPPPPPXXXXXXX	AMS(1)DLALELTK	3	3	0.30456			1346;1347;1348	1347	-2.73098	-2.55863	-2.81732	-1.98469	-1.74736	-1.98749	0.0019415	-0.795797	0.576025
Q0DK70	Os05g0188100	tr|Q0DK70|Q0DK70_ORYSJ	60	tr|Q0DK70|Q0DK70_ORYSJ	tr|Q0DK70|Q0DK70_ORYSJ	>tr|Q0DK70|Q0DK70_ORYSJ Os05g0188100 protein OS=Oryza sativa subsp. japonica OX=39947 GN=Os05g0188100 PE=2 SV=1	1	4.28e-26	138.53	1	S	WEGADGYADEDLDLISPKNSTSHSKSAASAA	X;X;X;X;X;X;X;X;X;X;X;X;X;X;X;Phospho (STY);X;X;X;X;X;X;X;X;X;X;X;X;X;X;X	PPPPPPPPPPPPPPPPPPXXXXXXXXXXXXX	FTWEGADGYADEDLDLIS(1)PK	18	2	0.41102			5778;5779;5780;5781;5782;5783;5784;5785;5786;5787	5781	0.0169919	0.00654464	0.0402163	0.69891	0.717686	0.759971	4.38174e-06	-0.704271	0.613752
Q2QT46	LOC_Os12g21890	tr|Q2QT46|Q2QT46_ORYSJ	121	tr|Q2QT46|Q2QT46_ORYSJ	tr|Q2QT46|Q2QT46_ORYSJ	>tr|Q2QT46|Q2QT46_ORYSJ Os12g0407500 protein OS=Oryza sativa subsp. japonica OX=39947 GN=LOC_Os12g21890 PE=2 SV=1	0.997635	0.000216584	53.796	2	S	KNTFSRLTSGLGLRLSPKGPQQDESAEGSTT	X;X;X;X;X;X;X;X;Phospho (STY);X;X;X;X;X;X;Phospho (STY);X;X;X;X;X;X;X;X;X;X;X;X;X;X;Phospho (STY)	XXXXXXPPPPPPPPPPPPXXXXXXXXXXXXX	LT(0.204)S(0.798)GLGLRLS(0.998)PK	10	3	0.094292			11133	11133	-2.28148	-2.12007	-2.05027	-1.38159	-1.43915	-1.48619	0.000671052	-0.714959	0.609222
Q5W6X0	Os05g0316800	tr|Q5W6X0|Q5W6X0_ORYSJ	23	tr|Q5W6X0|Q5W6X0_ORYSJ	tr|Q5W6X0|Q5W6X0_ORYSJ	>tr|Q5W6X0|Q5W6X0_ORYSJ Os05g0316800 protein OS=Oryza sativa subsp. japonica OX=39947 GN=Os05g0316800 PE=2 SV=1	1	0.0465555	29.263	1	S	PADSLAAGRSRRVGASMPRPKRVRVYFVDAD	X;X;X;X;X;X;X;X;X;X;X;X;X;X;X;Phospho (STY);X;X;X;X;X;X;X;X;X;X;X;X;X;X;X	XXXXXXXXXXXXPPPPPPPXXXXXXXXXXXX	VGAS(1)MPR	4	2	-3.0825			18283;18284	18284	0.395526	0.36331	0.416989	1.11577	1.18632	1.08067	2.94752e-05	-0.735642	0.600551
Q5ZDX7	Os01g0614700	tr|Q5ZDX7|Q5ZDX7_ORYSJ	221	tr|Q5ZDX7|Q5ZDX7_ORYSJ	tr|Q5ZDX7|Q5ZDX7_ORYSJ	>tr|Q5ZDX7|Q5ZDX7_ORYSJ Os01g0614700 protein OS=Oryza sativa subsp. japonica OX=39947 GN=Os01g0614700 PE=2 SV=1	0.999989	1.01e-21	106.01	2	S	SKEAPVSLKLPPPPPSPVSPTDSGIAASPFK	X;X;X;X;X;X;X;X;X;X;X;X;X;X;X;Phospho (STY);X;X;Phospho (STY);X;X;X;X;X;X;X;X;X;X;X;X	XXXXXXXXXPPPPPPPPPPPPPPPPPPPPPP	LPPPPPS(1)PVS(0.998)PT(0.002)DSGIAASPFK	7	3	0.4824			10731;10732;10733;10734;10735;10736;10737;10738;10739;10740;10741;10742;10743;10744;10745;10746;10747	10741	1.29913	1.34351	1.31709	2.02313	2.01878	2.08839	9.83337e-06	-0.723525	0.605616
Q6L561	Os05g0589600	tr|Q6L561|Q6L561_ORYSJ	300	tr|Q6L561|Q6L561_ORYSJ	tr|Q6L561|Q6L561_ORYSJ	>tr|Q6L561|Q6L561_ORYSJ Os05g0589600 protein OS=Oryza sativa subsp. japonica OX=39947 GN=Os05g0589600 PE=4 SV=1	1	0.00312705	49.222	1	S	LSVKKANEEVFIKLGSDKDLKKKEKDEKDER	X;X;X;X;X;X;X;X;X;X;X;X;X;X;X;Phospho (STY);X;X;X;X;X;X;X;X;X;X;X;X;X;X;X	XXXXXXXXXXXXXPPPPPPPPXXXXXXXXXX	LGS(1)DKDLK	3	2	-0.12659			10160;10161;10162;10163;10164;10165	10165	1.73159	1.71292	1.68258	2.81704	2.71189	2.78156	6.3003e-06	-1.06113	0.479256
Q75LR5	LOC_Os03g27260	tr|Q75LR5|Q75LR5_ORYSJ;tr|Q8LH97|Q8LH97_ORYSJ	231;231	tr|Q75LR5|Q75LR5_ORYSJ;tr|Q8LH97|Q8LH97_ORYSJ	tr|Q8LH97|Q8LH97_ORYSJ	>tr|Q75LR5|Q75LR5_ORYSJ 40S ribosomal protein S6 OS=Oryza sativa subsp. japonica OX=39947 GN=LOC_Os03g27260 PE=2 SV=1;>tr|Q8LH97|Q8LH97_ORYSJ 40S ribosomal protein S6 OS=Oryza sativa subsp. japonica OX=39947 GN=Os07g0622100 PE=2 SV=1	1	0.0029236	37.715	1;2	S	LLAQRLKEQRERRSESLAKRRSKLSAATTA_;LLAQRLKEQRERRSESLAKRRSKLSSAAKAA	X;X;X;X;X;X;X;X;X;X;X;X;X;Phospho (STY);X;Phospho (STY);X;X;X;X;X;Phospho (STY);X;X;Phospho (STY);Phospho (STY);X;Phospho (STY);X;X;X	XXXXXXXXXXPPPPPPPPPXXXXXXXXXXXX	ERRS(1)ES(1)LAK	6	3	-0.70029			4825;13800;13801;13802;13803;13804;13805;13806;13807;13808;13809	4825	3.24002	3.2412	3.20634	4.4219	4.32352	4.3717	3.07136e-06	-1.14319	0.452759
Q7XXS2	LOC_Os03g23010	tr|Q7XXS2|Q7XXS2_ORYSJ	120	tr|Q7XXS2|Q7XXS2_ORYSJ	tr|Q7XXS2|Q7XXS2_ORYSJ	>tr|Q7XXS2|Q7XXS2_ORYSJ 17.7 kDa low temperature induced protein OS=Oryza sativa subsp. japonica OX=39947 GN=LOC_Os03g23010 PE=2 SV=1	0.999978	0.00174091	73.176	1	S	AALKTDAVLKALSLVSPKGGDAPRGLREKPR	X;X;X;X;X;X;X;X;X;X;X;X;X;X;X;Phospho (STY);X;X;X;X;X;X;X;X;X;X;X;X;X;X;X	XXXXXXXXXXPPPPPPPPXXXXXXXXXXXXX	ALSLVS(1)PK	6	3	-0.016091			1226;1228;1229;1230;1231	1229	1.07346	1.09802	1.01705	2.34517	2.33344	2.31323	1.01354e-06	-1.26777	0.415301
Q8H5M0	Os07g0585000	tr|Q8H5M0|Q8H5M0_ORYSJ	434	tr|Q8H5M0|Q8H5M0_ORYSJ	tr|Q8H5M0|Q8H5M0_ORYSJ	>tr|Q8H5M0|Q8H5M0_ORYSJ Os07g0585000 protein OS=Oryza sativa subsp. japonica OX=39947 GN=Os07g0585000 PE=2 SV=1	1	0.000496265	47.669	1	S	AAAAAKKPMAGGPEKSPKVFYGSRAFF____	X;X;X;X;X;X;X;X;X;X;X;X;X;X;X;Phospho (STY);X;X;X;X;X;X;X;X;X;X;X;X;X;X;X	XXXXXXPPPPPPPPPPPPXXXXXXXXXXXXX	KPMAGGPEKS(1)PK	10	4	-0.70587			9325;9326	9326	0.688815	0.652465	0.754486	1.48455	1.33806	1.44612	0.000166628	-0.724322	0.605281
Q8LH97	Os07g0622100	tr|Q8LH97|Q8LH97_ORYSJ	237	tr|Q8LH97|Q8LH97_ORYSJ	tr|Q8LH97|Q8LH97_ORYSJ	>tr|Q8LH97|Q8LH97_ORYSJ 40S ribosomal protein S6 OS=Oryza sativa subsp. japonica OX=39947 GN=Os07g0622100 PE=2 SV=1	0.999983	0.00195961	55.133	1;2	S	KEQRERRSESLAKRRSKLSSAAKAAATTA__	X;X;X;X;X;X;X;Phospho (STY);X;Phospho (STY);X;X;X;X;X;Phospho (STY);X;X;Phospho (STY);X;X;X;X;X;X;X;X;X;X;X;X	XXXXXXXXXXXXXXXPPPPPPPPXXXXXXXX	S(1)KLS(0.951)S(0.049)AAK	1	3	-0.24584			15008;15014;15015;15016;15017;15018;15019;15020	15017	2.33926	2.31759	2.65357	3.50612	3.79373	3.43589	0.00177346	-1.14178	0.453201
Q8LH97	Os07g0622100	tr|Q8LH97|Q8LH97_ORYSJ	240	tr|Q8LH97|Q8LH97_ORYSJ	tr|Q8LH97|Q8LH97_ORYSJ	>tr|Q8LH97|Q8LH97_ORYSJ 40S ribosomal protein S6 OS=Oryza sativa subsp. japonica OX=39947 GN=Os07g0622100 PE=2 SV=1	0.951491	0.00195961	47.135	1;2	S	RERRSESLAKRRSKLSSAAKAAATTA_____	X;X;X;X;Phospho (STY);X;Phospho (STY);X;X;X;X;X;Phospho (STY);X;X;Phospho (STY);X;X;X;X;X;X;X;X;X;X;X;X;X;X;X	XXXXXXXXXXXXPPPPPPPPXXXXXXXXXXX	S(1)KLS(0.951)S(0.049)AAK	4	3	-0.24584			15006;15009;15010;15011;15012;15013;15015;15016;15017;15018;15019;15020	15017	3.09447	3.0902	3.23529	4.35496	4.47263	4.27754	7.75005e-05	-1.22839	0.426793
A0A0P0X4N7	Os07g0243150	tr|A0A0P0X4N7|A0A0P0X4N7_ORYSJ	74	tr|A0A0P0X4N7|A0A0P0X4N7_ORYSJ	tr|A0A0P0X4N7|A0A0P0X4N7_ORYSJ	>tr|A0A0P0X4N7|A0A0P0X4N7_ORYSJ Os07g0243150 protein (Fragment) OS=Oryza sativa subsp. japonica OX=39947 GN=Os07g0243150 PE=4 SV=1	0.991758	0.000961635	53.451	1	T	LNKVEEKAPAAASRATKASGAPAKKAAGDGD	X;X;X;X;X;X;X;X;X;X;X;X;X;X;X;Phospho (STY);X;X;X;X;X;X;X;X;X;X;X;X;X;X;X	XXXXXXXXXXXXXXPPPPPPPPPPXXXXXXX	AT(0.992)KAS(0.008)GAPAK	2	3	0.093655			2024;2025;2026	2025	1.46655	1.41178	1.45564	2.42907	2.31949	2.32874	1.93616e-05	-0.914441	0.530549
A0A0P0X4N7	Os07g0243150	tr|A0A0P0X4N7|A0A0P0X4N7_ORYSJ	28	tr|A0A0P0X4N7|A0A0P0X4N7_ORYSJ	tr|A0A0P0X4N7|A0A0P0X4N7_ORYSJ	>tr|A0A0P0X4N7|A0A0P0X4N7_ORYSJ Os07g0243150 protein (Fragment) OS=Oryza sativa subsp. japonica OX=39947 GN=Os07g0243150 PE=4 SV=1	0.982878	2.44e-05	112.95	1	T	PPSARVARPSATKSVTAAAATEEKGLFDAIF	X;X;X;X;X;X;X;X;X;X;X;X;X;X;X;Phospho (STY);X;X;X;X;X;X;X;X;X;X;X;X;X;X;X	XXXXXXXXXXXXXPPPPPPPPPPPXXXXXXX	S(0.017)VT(0.983)AAAATEEK	3	3	-1.0606			16292;16293;16294;16295;16296;16297;16298;16299;16300;16301;16302	16295	2.07544	2.05514	2.00558	2.79115	2.71585	2.7555	1.9174e-05	-0.708782	0.611836
Q75LR5	LOC_Os03g27260	tr|Q75LR5|Q75LR5_ORYSJ	243	tr|Q75LR5|Q75LR5_ORYSJ	tr|Q75LR5|Q75LR5_ORYSJ	>tr|Q75LR5|Q75LR5_ORYSJ 40S ribosomal protein S6 OS=Oryza sativa subsp. japonica OX=39947 GN=LOC_Os03g27260 PE=2 SV=1	0.847101	0.00531618	51.006	1	T	RSESLAKRRSKLSAATTA_____________	X;Phospho (STY);X;Phospho (STY);X;X;X;X;X;X;X;X;X;X;X;Phospho (STY);X;X;X;X;X;X;X;X;X;X;X;X;X;X;X	XXXXXXXXXPPPPPPPPPXXXXXXXXXXXXX	SKLS(0.004)AAT(0.847)T(0.148)A	7	2	-0.33282			15002;15003;15005	15002	0.830282	0.737363	0.819345	1.81849	1.69592	1.7446	3.189e-05	-0.95734	0.515006
Q5JN42	PSD2	sp|Q5JN42|PSD2_ORYSJ	56	sp|Q5JN42|PSD2_ORYSJ	sp|Q5JN42|PSD2_ORYSJ	>sp|Q5JN42|PSD2_ORYSJ Phosphatidylserine decarboxylase proenzyme 2 OS=Oryza sativa subsp. japonica OX=39947 GN=PSD2 PE=3 SV=3	0.97846	2.86e-15	100.72	1	S	RDRAGRPGGDAHASESGTGRAIAVDEFAGIA	X;X;X;X;X;X;X;X;X;X;X;X;X;X;X;Phospho (STY);X;X;X;X;X;X;X;X;X;X;X;X;X;X;X	XXXPPPPPPPPPPPPPPPPPXXXXXXXXXXX	AGRPGGDAHAS(0.006)ES(0.978)GT(0.015)GR	13	3	0.23988			794;795;796;797	794	-0.989961	-1.1155	-0.996278	-1.72029	-1.56002	-1.59905	0.000721428	0.592539	1.5079
A0A0P0VM23	Os02g0615800	tr|A0A0P0VM23|A0A0P0VM23_ORYSJ;tr|Q6K7X0|Q6K7X0_ORYSJ	475;853	tr|A0A0P0VM23|A0A0P0VM23_ORYSJ	tr|A0A0P0VM23|A0A0P0VM23_ORYSJ	>tr|A0A0P0VM23|A0A0P0VM23_ORYSJ Os02g0615800 protein (Fragment) OS=Oryza sativa subsp. japonica OX=39947 GN=Os02g0615800 PE=4 SV=1;>tr|Q6K7X0|Q6K7X0_ORYSJ Os02g0615800 protein OS=Oryza sativa subsp. japonica OX=39947 GN=Os02g0615800 PE=4 SV=1	0.807785	1.82e-17	102.38	1	S	ARFYIDSWSTSTGSNSTVGVKGTIGYIPPEY	X;X;X;X;X;X;X;X;X;X;X;X;X;X;X;Phospho (STY);X;X;X;X;X;X;X;X;X;X;X;X;X;X;X	XXPPPPPPPPPPPPPPPPPPPXXXXXXXXXX	FYIDSWSTS(0.005)T(0.005)GS(0.003)NS(0.808)T(0.18)VGVK	14	3	-0.84962			5848;5851	5848	-1.43349	-1.40521	-1.43462	-2.11466	-2.23215	-2.49429	0.00160824	0.855926	1.80992
Q0DMP3	Os03g0800000	tr|Q0DMP3|Q0DMP3_ORYSJ;tr|Q851R0|Q851R0_ORYSJ	390;625	tr|Q0DMP3|Q0DMP3_ORYSJ	tr|Q0DMP3|Q0DMP3_ORYSJ	>tr|Q0DMP3|Q0DMP3_ORYSJ Os03g0800000 protein (Fragment) OS=Oryza sativa subsp. japonica OX=39947 GN=Os03g0800000 PE=4 SV=1;>tr|Q851R0|Q851R0_ORYSJ Nodulin family protein, putative, expressed OS=Oryza sativa subsp. japonica OX=39947 GN=LOC_Os03g58580 PE=4 S	0.999996	1.02e-07	90.294	1	S	DTAAEKRSTLVNDEDSKKG____________	X;X;X;X;X;X;X;X;X;X;X;X;X;X;X;Phospho (STY);X;X;X;X;X;X;X;X;X;X;X;X;X;X;X	XXXXXXXPPPPPPPPPPPPXXXXXXXXXXXX	STLVNDEDS(1)KKG	9	3	-2.243			16071;16072;16073	16071	3.07324	3.09451	3.15032	1.69176	1.63444	1.61376	1.51672e-06	1.45937	2.74989
Q0IZR7	Os09g0553900	tr|Q0IZR7|Q0IZR7_ORYSJ	135	tr|Q0IZR7|Q0IZR7_ORYSJ	tr|Q0IZR7|Q0IZR7_ORYSJ	>tr|Q0IZR7|Q0IZR7_ORYSJ Os09g0553900 protein OS=Oryza sativa subsp. japonica OX=39947 GN=Os09g0553900 PE=2 SV=1	1	0.00452099	31.956	1	S	GEKKGIWGWKPIRALSHIGMNRLGCLFSVEV	X;X;X;X;X;X;X;X;X;X;X;X;X;X;X;Phospho (STY);X;X;X;X;X;X;X;X;X;X;X;X;X;X;X	XXXXXXXXXXXXXPPPPPPPPPXXXXXXXXX	ALS(1)HIGMNR	3	2	-1.8678			1224;1225	1225	0.956883	0.974026	0.927261	0.324126	0.291818	0.265726	7.03949e-06	0.658833	1.57881
Q10DR8	LOC_Os03g51250	tr|Q10DR8|Q10DR8_ORYSJ	325	tr|Q10DR8|Q10DR8_ORYSJ	tr|Q10DR8|Q10DR8_ORYSJ	>tr|Q10DR8|Q10DR8_ORYSJ Adenylyl cyclase-associated protein OS=Oryza sativa subsp. japonica OX=39947 GN=LOC_Os03g51250 PE=2 SV=1	0.993628	0.0090925	34.574	1	S	TAAPAAAPEKTSRAGSFSFKSGPPKLELQMG	X;X;X;X;X;X;X;X;X;X;X;X;X;X;X;Phospho (STY);X;X;X;X;X;X;X;X;X;X;X;X;X;X;X	XXXXXXXXXXXXXPPPPPPPXXXXXXXXXXX	AGS(0.994)FS(0.006)FK	3	3	-0.40667			818;819;820;821;822;823;824;825	819	4.67093	4.71324	4.68043	4.11123	4.01824	4.02866	3.83268e-05	0.635492	1.55347
Q339A6	LOC_Os10g22950	tr|Q339A6|Q339A6_ORYSJ	379	tr|Q339A6|Q339A6_ORYSJ	tr|Q339A6|Q339A6_ORYSJ	>tr|Q339A6|Q339A6_ORYSJ Anther ethylene-upregulated protein ER1, putative, expressed OS=Oryza sativa subsp. japonica OX=39947 GN=LOC_Os10g22950 PE=3 SV=1	0.977189	0.000242555	44.117	2	S	FLKTQSSNLSDILKDSFKKSDSFTRWMSKEL	X;X;X;X;X;Phospho (STY);Phospho (STY);X;X;Phospho (STY);X;X;X;X;X;Phospho (STY);X;X;X;X;X;X;X;X;X;X;X;X;X;X;X	XXXPPPPPPPPPPPPPPPPXXXXXXXXXXXX	T(0.044)QS(0.193)S(0.154)NLS(0.632)DILKDS(0.977)FKK	13	4	0.32585			17337;17339	17339	0.352154	0.336091	0.346114	-0.278342	-0.361571	-0.463805	0.000188151	0.712692	1.63886
Q5JMS3	Os01g0964000	tr|Q5JMS3|Q5JMS3_ORYSJ;tr|Q5N9F2|Q5N9F2_ORYSJ	185;187	tr|Q5JMS3|Q5JMS3_ORYSJ	tr|Q5JMS3|Q5JMS3_ORYSJ	>tr|Q5JMS3|Q5JMS3_ORYSJ Os01g0964000 protein OS=Oryza sativa subsp. japonica OX=39947 GN=Os01g0964000 PE=2 SV=1;>tr|Q5N9F2|Q5N9F2_ORYSJ Os01g0866300 protein OS=Oryza sativa subsp. japonica OX=39947 GN=Os01g0866300 PE=2 SV=1	1	0.000208361	63.677	1	S	HKTIDSVLSRGERLDSLVEKSSDLSAASQMF	X;X;X;X;X;X;X;X;Phospho (STY);X;X;X;X;X;X;Phospho (STY);X;X;X;X;X;X;X;X;X;X;X;X;X;X;X	XXXXXXXXXXPPPPPPPPPPXXXXXXXXXXX	LDS(1)LVEK	3	2	-0.79883			6211;6212;9911;9912;9913	9913	2.59711	2.57127	2.6843	1.90836	2.04466	1.83358	0.000619384	0.688694	1.61182
Q5Z9P6	Os06g0715500	tr|Q5Z9P6|Q5Z9P6_ORYSJ	253	tr|Q5Z9P6|Q5Z9P6_ORYSJ	tr|Q5Z9P6|Q5Z9P6_ORYSJ	>tr|Q5Z9P6|Q5Z9P6_ORYSJ Signal sequence receptor subunit alpha OS=Oryza sativa subsp. japonica OX=39947 GN=Os06g0715500 PE=2 SV=1	0.851659	8.26e-48	192.8	1	S	MDEWLEGTAFAQGSKSKKKK___________	X;X;X;X;X;X;X;X;X;X;X;X;X;X;X;Phospho (STY);X;X;X;X;X;X;X;X;X;X;X;X;X;X;X	PPPPPPPPPPPPPPPPPXXXXXXXXXXXXXX	VELGTGTTDANMDEWLEGT(0.003)AFAQGS(0.146)KS(0.852)K	27	4	-0.11051			18180;18181	18181	0.466298	0.426126	0.642984	-0.476648	-0.413307	-0.367929	0.000225912	0.931097	1.90673
Q69IN8	Os09g0513000	tr|Q69IN8|Q69IN8_ORYSJ	16	tr|Q69IN8|Q69IN8_ORYSJ	tr|Q69IN8|Q69IN8_ORYSJ	>tr|Q69IN8|Q69IN8_ORYSJ Os09g0513000 protein OS=Oryza sativa subsp. japonica OX=39947 GN=Os09g0513000 PE=4 SV=1	0.98847	2.13e-05	77.692	1	S	MEDQKKNAKPEGSSGSQRGAPPAPDAGLPNP	X;X;X;X;X;X;X;X;X;X;X;X;X;X;X;Phospho (STY);X;X;X;X;X;X;X;X;X;X;X;X;X;X;X	XXXXXXPPPPPPPPPPPPXXXXXXXXXXXXX	NAKPEGS(0.001)S(0.01)GS(0.988)QR	10	3	-0.39388			11934;11935;11936;11937;11938;11939	11938	1.22592	1.23378	1.28418	0.544792	0.311776	0.538574	0.000576254	0.782911	1.7206
Q6ES98	Os09g0346700	tr|Q6ES98|Q6ES98_ORYSJ	126	tr|Q6ES98|Q6ES98_ORYSJ	tr|Q6ES98|Q6ES98_ORYSJ	>tr|Q6ES98|Q6ES98_ORYSJ Os09g0346700 protein OS=Oryza sativa subsp. japonica OX=39947 GN=Os09g0346700 PE=2 SV=1	0.809186	4.41e-05	49.986	1	S	AASKMKKALGLRSSASSKGGSPGSGGGGKSV	X;X;X;X;X;X;X;X;X;X;X;X;X;X;X;Phospho (STY);X;X;X;X;Phospho (STY);X;X;X;X;X;X;X;X;X;X	XXXXXXXXXXXXPPPPPPPPPPPPPPPPPXX	S(0.024)S(0.082)AS(0.809)S(0.081)KGGS(0.004)PGSGGGGK	4	3	-0.94987			15663;15664;15665	15663	0.963549	0.883781	1.01749	0.199554	0.251768	0.192081	6.75747e-05	0.740473	1.67072
Q6Z3Y9	Os07g0694000	tr|Q6Z3Y9|Q6Z3Y9_ORYSJ	273	tr|Q6Z3Y9|Q6Z3Y9_ORYSJ	tr|Q6Z3Y9|Q6Z3Y9_ORYSJ	>tr|Q6Z3Y9|Q6Z3Y9_ORYSJ Phosphoinositide phospholipase C OS=Oryza sativa subsp. japonica OX=39947 GN=Os07g0694000 PE=2 SV=1	1	1.58e-07	99.37	1	T	KPPREYLQAKDGNAATIKEDAKAAATDDAAW	X;X;X;X;X;X;X;X;X;X;X;X;X;X;X;Phospho (STY);X;X;X;X;X;X;X;X;X;X;X;X;X;X;X	XXXXXXXXXXPPPPPPPPPPPPXXXXXXXXX	DGNAAT(1)IKEDAK	6	2	0.59191			2848;2849;2850;2851;2852;2853	2853	3.41762	3.37998	3.45612	2.45874	2.39532	2.43187	4.199e-06	0.989266	1.98517
