# Supplementary material for: ZmPP2C26 Alternative Splicing Variants Negatively Regulate Drought Tolerance in Maize
Source: Front Plant Sci. 2022 Apr 8;13:851531. doi: 10.3389/fpls.2022.851531 (PMC9024303; doi:10.3389/fpls.2022.851531)
Supplement: Supplementary file 7 [file Data_Sheet_7.XLSX]

## Sheet: SUPPLEMENTARY TABLE 6
SUPPLEMENTARY TABLE 6 Phosphosites identified between the zmpp2c26 and W22 lines using TMT quantitative phosphoproteomics.
Accession	Gene Name	Proteins	Positions within proteins	Protein	PEP	Delta score	Number of Phospho (STY)	Amino acid	Sequence window	Modification window	Peptide window coverage	Phospho (STY) Probabilities	Position in peptide	Charge	Mass error [ppm]	Reverse	Potential contaminant	MS/MS IDs	Best localization MS/MS ID	zmpp2c26-1	zmpp2c26-2	zmpp2c26-3	Nip-1	Nip-2	Nip-3	P-value	log2(FC)	FC
A0A060D6S6	COL11	A0A060D6S6;A0A1D6E763	187;187	A0A060D6S6	3.66e-08	86.617	1	S	RSMDEIKTIGVQQSGSPELDLAGTKLFYSDH	X;X;X;X;X;X;X;X;X;X;X;X;X;X;X;Phospho (STY);X;X;X;X;X;X;X;X;X;X;X;X;X;X;X	XXXXXXXPPPPPPPPPPPPPPPPPPXXXXXX	TIGVQQS(0.035)GS(0.965)PELDLAGTK	9	3	0.5059			9094	9094	0.251214	0.144618	0.00717491	-0.629504	-0.402516	-0.565455	0.00241403	0.666827	1.58758
C4IYG5	100384540	C4IYG5;A0A1D6LD42;A0A1D6LD87;A0A1D6LD46;A0A1D6LD18;A0A1D6LD13;A0A3L6E6Z4;A0A1D6LD67;A0A1D6LDA0;A0A1D6LD30;A0A1D6LD32;A0A1D6LD23;A0A1D6LD19;A0A1D6LD22;A0A1D6LD92;A0A1D6LD26;A0A1D6LD14;A0A1D6LD37;A0A1D6LD45;A0A1D6LD76;A0A1D6LDA5;A0A1D6LD40;A0A1D6LD85;A0A1D6LD88;A0A096R4D2	47;567;769;761;769;769;769;680;667;680;769;769;769;214;769;769;769;769;769;768;769;767;769;158;769	C4IYG5	0.0264607	24.906	1	S	PVFRIPSPPRIAFPGSPGQRILKSPIEFDNG	X;X;X;X;X;X;X;X;X;X;X;X;X;X;X;Phospho (STY);X;X;X;X;X;X;X;X;X;X;X;X;X;X;X	XXXXXXXXXXPPPPPPPPPPXXXXXXXXXXX	IAFPGS(1)PGQR	6	2	-0.019795			4057	4057	0.335126	0.439729	0.589073	-0.218585	-0.253483	-0.139264	0.00124977	0.65842	1.57835
A0A3L6E1X9	MOT1_2	A0A3L6E1X9;A0A096TR23	24;24	A0A3L6E1X9	0.00106449	48.877	1	S	LLPGEGSGRRLGFLPSSIRLKTSVWSELGGA	X;X;X;X;X;X;X;X;X;X;X;X;X;X;X;Phospho (STY);X;X;X;X;X;X;X;X;X;X;X;X;X;X;X	XXXXXXXXXXPPPPPPPPPXXXXXXXXXXXX	LGFLPS(0.773)S(0.227)IR	6	2	-0.2674			5415	5415	0.454916	0.461321	0.472872	-2.15674	-1.83191	-2.36795	7.80241e-05	2.5819	5.9873
W5RZV8	Cystatin	W5RZV8;W1IAF3;Q30KW7;Q30KV8;Q30KV7;A5HMM8;A0A3L6DTA8;A0A3L6DQD3;A0A0A1P8Y6;A0A0A1P1P0	133;133;133;133;133;133;133;133;133;133	W5RZV8	8.38e-11	99.431	1	S	NLKGLQEFKPVEEGASA______________	X;X;X;X;X;X;X;X;X;X;X;X;X;X;X;Phospho (STY);X;X;X;X;X;X;X;X;X;X;X;X;X;X;X	XXXPPPPPPPPPPPPPPXXXXXXXXXXXXXX	GLQEFKPVEEGAS(1)A	13	3	0.54515			3456;3457;3458	3458	2.89593	2.66531	2.92118	1.33023	1.32077	1.1832	8.01983e-05	1.54941	2.92697
B6U8S9	MSRA4	B6U8S9;A0A317YBQ6;A0A1D6K8P1;A0A0D5BXR6	69;69;69;69	B6U8S9	2.55e-102	126.32	1	S	AMSWLGKLGLSGLGGSPRASEASAALAQGPD	X;X;X;X;X;X;X;X;X;X;X;X;X;X;X;Phospho (STY);X;X;X;X;X;X;X;X;X;X;X;X;X;X;X	XXXXXXXPPPPPPPPPPPXXXXXXXXXXXXX	LGLSGLGGS(1)PR	9	2	0.21401			5434;5435;5436	5435	1.36915	1.46066	1.44598	0.461564	0.565145	0.496904	2.49861e-05	0.91739	1.8887
B7ZYI3	100279514	B7ZYI3;A0A3L6DNX3;A0A0H4NWV3	205;205;205	B7ZYI3	2.58e-23	102.75	1	S	ARGSEDIKRFYKRIDSNLLNKIPRGPVKTKV	X;X;X;X;X;X;X;X;X;X;X;X;X;X;X;Phospho (STY);X;X;X;X;X;X;X;X;X;X;X;X;X;X;X	XXXXXXXXXXXXPPPPPPPPPPPPXXXXXXX	RIDS(1)NLLNKIPR	4	3	-0.23297			4129;4130;7024;7025;7026;7027;7028	7028	4.29729	4.20003	4.18486	3.50731	3.36162	3.48948	0.00017983	0.774589	1.7107
A0A1D6IZ37	ZEAMMB73_Zm00001d024411	A0A1D6IZ37;A0A3L6DIS5;A0A1D6LUP1;A0A1D6DRQ2;Q6QP47;E5L882;B6TDC9;B4F9L9;V5JTN5;A0A1D6LSA6;A0A1D6MLC8;V5QDM6;A0A1D6PEN7;A0A1D6P311;A0A3L6FBC6;A0A3L6FZ51;A0A3L6F6X2;A0A1D6QD91;A0A1D6PWZ1	26;240;397;381;355;240;240;240;240;236;26;236;244;174;131;98;59;59;397	A0A1D6IZ37	7.17e-12	86.899	1	S	LNNKELEFYKWEGNLSQLLQNVRNKLNQVAS	X;X;X;X;X;X;X;X;X;X;X;X;X;X;X;Phospho (STY);X;X;X;X;X;X;X;X;X;X;X;X;X;X;X	XXXXXXXXXXPPPPPPPPPPPPPXXXXXXXX	WEGNLS(1)QLLQNVR	6	3	-1.3046			10149;10150	10150	1.10174	0.782452	1.02884	0.151408	-0.0735108	0.0905252	0.00147481	0.91487	1.8854
A0A1D6E552	ZEAMMB73_Zm00001d002905	A0A1D6E552;B6T7A7;A0A1D6E547;B6U4P1	62;62;62;62	A0A1D6E552	0.000628653	29.555	2	S	AATSVHSTPALSPMASPRHSHSHSHSSMGRD	X;X;X;X;X;X;X;Phospho (STY);X;X;X;X;X;Oxidation (M);X;Phospho (STY);X;X;X;X;X;X;X;X;X;X;X;X;X;X;X	PPPPPPPPPPPPPPPPPPXXXXXXXXXXXXX	AAT(0.001)S(0.002)VHS(0.222)T(0.494)PALS(0.524)PMAS(0.757)PR	16	3	-0.0038197			171	171	-1.44063	-1.37549	-1.13871	-1.92126	-2.15426	-2.08739	0.00305507	0.736026	1.66558
C0P4U5	100382145	C0P4U5;A0A1D6E5P4	52;52	C0P4U5	6.04e-11	74.578	1	S	RRPAPLLVVRAKRAGSQPPAAAASRQPANPS	X;X;X;X;X;X;X;X;X;X;X;X;X;X;X;Phospho (STY);X;X;X;X;X;X;X;X;X;X;X;X;X;X;X	XXXXXXXXXXXXXPPPPPPPPPPPPXXXXXX	AGS(1)QPPAAAASR	3	2	-0.28088			366	366	-0.00654134	-0.100662	0.0751927	-5.45553	-4.25775	-6.09502	0.000626551	5.25876	38.2865
A0A3L6FQE6	EIF4B_0	A0A3L6FQE6;A0A1D6E8D9;A0A1D6E8D6;A0A3L6GGJ4;B6TZD9;A0A1D6J8M8;A0A1D6J8M9;A0A1D6J8N0	189;191;191;190;190;190;190;34	A0A3L6GGJ4	0.0100847	21.642	1	S	PAPADSGRRDRFGGPSPLGRADDIDDWSRDK;PAPTDSGRRDRFGGPSPLGRADDIDDWSRGK	X;X;X;X;X;X;X;X;X;X;X;X;X;X;X;Phospho (STY);X;X;X;X;X;X;X;X;X;X;X;X;X;X;X	XXXXXXXXXXXPPPPPPPPPXXXXXXXXXXX	FGGPS(1)PLGR	5	2	0.26613			2185	2185	-0.377637	-0.540548	-0.401731	-1.17831	-1.47266	-1.14845	0.00200108	0.826502	1.77338
B6T1U8	Zm00014a_043592	B6T1U8;A0A3L6GDI9;A0A1D6Q3U2;O50019;A0A1D6HBR7;A0A1D6E8R4;A0A1D6Q3U1;P49103;P49104;A0A3L6EMN6;B4FL36;A0A3L6GC77;A0A1D6HBS0	67;67;67;67;67;67;67;67;67;67;67;152;21	B6T1U8	3.09e-122	183.24	1	S	NKPIKLQIWDTAGQESFRSITRSYYRVAAGA	X;X;X;X;X;X;X;X;X;X;X;X;X;X;X;Phospho (STY);X;X;X;X;X;X;X;X;X;X;X;X;X;X;X	XXXXXPPPPPPPPPPPPPXXXXXXXXXXXXX	LQIWDTAGQES(1)FR	11	2	3.2371			5784;5785	5785	2.73162	2.79797	2.84913	2.13655	1.99102	2.16633	0.000407177	0.694942	1.61882
A0A1D6J6S7	ZEAMMB73_Zm00001d025374	A0A1D6J6S7;A0A3L6GBN8;B6SZE5;B7ZYC3;B6SL09;A0A3L6FRN1;A0A1D6EBD8	56;56;71;90;90;111;111	A0A1D6J6S7	5.5e-05	57.76	1	S	GVPAPGRAPVIIYDASPKVIHVKPSDFMALV	X;X;X;X;X;X;X;X;X;X;X;X;X;X;X;Phospho (STY);X;X;X;X;X;X;X;X;X;X;X;X;X;X;X	XXXXXXXPPPPPPPPPPPXXXXXXXXXXXXX	APVIIYDAS(1)PK	9	3	-0.7254			767	767	-1.07183	-1.11756	-0.871227	-1.75866	-1.58307	-1.55423	0.00348552	0.611781	1.52814
B6ST12	ZEAMMB73_Zm00001d003833	B6ST12;A0A1D6EBU3;B6TRQ3;A0A3L6FUS2	31;31;35;35	B6ST12	0.0143959	49.331	1	S	RQGAAAAPAPAQRSASFHGRGTEQRHHQPQK	X;X;X;X;X;X;X;X;X;X;X;X;X;X;X;Phospho (STY);X;X;X;X;X;X;X;X;X;X;X;X;X;X;X	XXXXXXXXXXXXXPPPPPPPXXXXXXXXXXX	S(0.009)AS(0.991)FHGR	3	2	-0.094662			7485;7486	7486	0.128206	0.0353132	0.105909	-0.689775	-0.661779	-0.877704	0.000342909	0.832895	1.78126
A0A1D6EFQ0	ZEAMMB73_Zm00001d004480	A0A1D6EFQ0;A0A3L6FQR7	225;253	A0A1D6EFQ0	0.00049014	70.313	2	S	YSMIRWAGLGTEDDGSDEASP__________	X;X;X;X;X;X;X;X;X;X;X;X;X;X;X;Phospho (STY);X;X;X;Phospho (STY);X;X;X;X;X;X;X;X;X;X;X	XXXXXPPPPPPPPPPPPPPPPXXXXXXXXXX	WAGLGTEDDGS(1)DEAS(1)P	11	2	-0.4396			10141	10141	0.802762	0.684941	0.719372	0.0346054	0.221841	0	0.00109217	0.65021	1.5694
A0A1D6EFQ0	ZEAMMB73_Zm00001d004480	A0A1D6EFQ0;A0A3L6FQR7	229;257	A0A1D6EFQ0	0.00049014	70.313	2	S	RWAGLGTEDDGSDEASP______________	X;X;X;X;X;X;X;X;X;X;X;Phospho (STY);X;X;X;Phospho (STY);X;X;X;X;X;X;X;X;X;X;X;X;X;X;X	XPPPPPPPPPPPPPPPPXXXXXXXXXXXXXX	WAGLGTEDDGS(1)DEAS(1)P	15	2	-0.4396			10141	10141	0.802762	0.684941	0.719372	0.0346054	0.221841	0	0.00109217	0.65021	1.5694
A0A1D6EL66	ZEAMMB73_Zm00001d005229	A0A1D6EL66;C0P9B3;B6TXJ7;A0A3L6FY83;A0A1D6EL64;A0A3L6G216;A0A1D6EL60	44;166;166;166;44;166;166	A0A1D6EL66	0.00019485	51.609	1	S	PTYFETNHEARISFLSPRSDSVRRSPTADDI	X;X;X;X;X;X;X;X;X;X;X;X;X;X;X;Phospho (STY);X;X;X;X;X;X;X;X;X;X;X;X;X;X;X	XXXXXXXXXXXPPPPPPPXXXXXXXXXXXXX	ISFLS(1)PR	5	2	-0.23273			4376	4376	-0.618258	-0.665234	-0.728576	-1.61219	-1.38729	-1.19219	0.00442278	0.726532	1.65466
A0A3L6FX57	Zm00014a_025321	A0A3L6FX57;A0A1D6ERQ2	145;145	A0A3L6FX57	3.85e-06	71.621	1	S	PEFFSRDKNSHEKGNSPSSAADFSAKNNSPP	X;X;X;X;X;X;X;X;X;X;X;X;X;X;X;Phospho (STY);X;X;X;X;X;X;X;X;X;X;X;X;X;X;X	XXXXXXXXXXXXXPPPPPPPPPPPPPXXXXX	GNS(0.959)PS(0.038)S(0.003)AADFSAK	3	2	0.094367			3500	3500	-0.28859	-0.221744	-0.166088	-0.937593	-1.19722	-0.653853	0.0119018	0.704082	1.62911
A0A1D6EX72	ZEAMMB73_Zm00001d006504	A0A1D6EX72;A0A1D6EX77;A0A1D6EX59;A0A1D6EX58;A0A3L6FYL6;A0A1D6EX64;A0A1D6EX76;A0A1D6EX60	134;412;514;514;600;613;613;669	A0A1D6EX72	1.47e-08	82.907	1	S	SSGRRGGGPALGFDSSPGRSSKHNGFHEYSN	X;X;X;X;X;X;X;X;X;X;X;X;X;X;X;Phospho (STY);X;X;X;X;X;X;X;X;X;X;X;X;X;X;X	XXXXXPPPPPPPPPPPPPPXXXXXXXXXXXX	GGGPALGFDS(0.149)S(0.851)PGR	11	2	-0.43333			2594	2594	0.498412	0.579748	0.626739	0.00958291	-0.133924	0.0310156	0.00072054	0.599408	1.5151
A0A1D6EXQ5	100383319	A0A1D6EXQ5;C0PF30;A0A3L6FPB1;A0A1D6EXR0;A0A1D6EXQ0;A0A1D6EXS3	288;357;357;360;426;31	A0A1D6EXQ5	1.24e-54	151.08	1	S	KERGVDVLASDLEKTSPVGRPKGEFAKVEQK	X;X;X;X;X;X;X;X;X;X;X;X;X;X;X;Phospho (STY);X;X;X;X;X;X;X;X;X;X;X;X;X;X;X	XXXPPPPPPPPPPPPPPPPPPPXXXXXXXXX	GVDVLASDLEKT(0.062)S(0.938)PVGRPK	13	4	-0.15747			3715;3716	3715	1.9044	1.89195	1.8413	0.535973	1.4235	0.456431	0.0258623	1.07392	2.10514
A0A3L6FZW3	Os07g0568300_0	A0A3L6FZW3;A0A1D6EZ54;B8A374;K7UGY0;B7ZYH4;A0A3L6DZC4	505;499;139;266;506;506	K7UGY0	0.000937423	71.104	1	S	SALLNKFHHQQKGLLSPVNTNRIYSPRGLDP;SALLNKFHHQQKGLLSPVNTNRMYSPRGLDP	X;X;X;X;X;X;X;X;X;X;X;X;X;X;X;Phospho (STY);X;X;X;X;X;X;X;X;X;X;X;X;X;X;X	XXXXXXXXXXXXPPPPPPPPPPXXXXXXXXX	GLLS(0.998)PVNT(0.002)NR	4	2	0.62256			3454	3454	-0.160691	-0.161238	-0.194381	-0.855401	-0.798324	-0.98356	0.000224898	0.706992	1.6324
A0A1D6F201	100274081	A0A1D6F201;A0A1D6F212;A0A1D6F207;A0A1D6F202;A0A1D6F205;B6TEJ7;B4FBJ4;A0A3L6G078;B4FSL4;B4FYY3;A0A1D6F204;A0A1D6F203	84;161;84;84;196;161;161;171;195;196;205;223	A0A1D6F201	0.0147128	15.895	1	S	GTLLSEDDSKMKKQISDLKSKELSGHDIFAP	X;X;X;X;X;X;X;X;X;X;X;X;X;X;X;Phospho (STY);X;X;X;X;X;X;X;X;X;X;X;X;X;X;X	XXXXXXXXXXXXPPPPPPPXXXXXXXXXXXX	KQIS(1)DLK	4	3	-0.1407			5063	5063	-0.311226	-0.574158	-0.631193	-1.30316	-1.26699	-1.38389	0.00147104	0.812486	1.75624
A0A1D6F2P9	100279429	A0A1D6F2P9;A0A1D6F2M3;A0A1D6F2N8;A0A1D6F2N0;B7ZY38;A0A1D6F2M9;A0A1D6F2M5;A0A1D6F2N6;A0A1D6F2N4;A0A1D6F2M6;A0A1D6F2M8;A0A3L6FYQ2	111;333;420;455;465;562;629;676;676;677;716;756	A0A1D6F2P9	8.96e-36	125.44	1	S	PISDGKVPFFADDEESPATPKADAFFIPREN	X;X;X;X;X;X;X;X;X;X;X;X;X;X;X;Phospho (STY);X;X;X;X;X;X;X;X;X;X;X;X;X;X;X	XXXXXXPPPPPPPPPPPPPPPPPPPPPPPXX	VPFFADDEES(0.976)PAT(0.024)PK	10	3	-0.23744			9833;9835	9833	1.38141	1.39527	1.39076	0.257428	0.512672	0.260135	0.000247677	1.04574	2.06442
A0A1D6F3N0	103647912	A0A1D6F3N0;A0A1D6F3H0;A0A1D6F3M1;A0A1D6F3M0;A0A1D6F3F9;A0A1D6F3L7;A0A1D6F385;A0A3L6FYJ1;A0A1D6F3I4;A0A1D6F390;A0A1D6F3I1;A0A1D6F363;A0A1D6F3L6;A0A1D6F3E6;A0A1D6F3D8;A0A1D6F3I7;A0A1D6F3E7;A0A1D6F3E2;A0A1D6F3F7;A0A1D6F356;A0A1D6F3F8;A0A1D6F383;A0A1D6F388;A0A1D6F374;A0A1D6F3K7;A0A1D6F3K4;A0A1D6F354;A0A1D6F3L9;A0A1D6F367;A0A1D6F3I8;A0A1D6F3M7;A0A1D6F3I9;A0A1D6F3L1;A0A1D6F3G9;A0A1D6F3M3;A0A1D6F3G6;A0A…	55;55;55;55;55;55;55;55;55;55;55;55;55;55;55;55;55;55;55;55;55;55;55;55;55;55;55;55;55;55;55;55;55;55;55;55;55	A0A1D6F3N0	3.81e-06	74.817	1	S	SRQWNLNEKAEDAYHSEAEQYESGQSGLYAS	X;X;X;X;X;X;X;X;X;X;X;X;X;X;X;Phospho (STY);X;X;X;X;X;X;X;X;X;X;X;X;X;X;X	XXXXXXXXXPPPPPPPPPPPPPPPPPPPPPP	AEDAY(0.001)HS(0.999)EAEQYESGQSGLYASR	7	3	-0.63012			235	235	-0.356572	-0.467661	-0.667053	-1.35852	-0.91138	-1.26509	0.0141238	0.681233	1.60351
C4IZK3	Zm00014a_038601	C4IZK3;A0A3L6G6M8;A0A1D6F3S5;A0A1D6F3T2	28;35;659;28	C4IZK3	5.36e-05	50.136	1	S	FTEDETKLFQGQPLKSPNKSVSKECERTEIQ	X;X;X;X;X;X;X;X;X;X;X;X;X;X;X;Phospho (STY);X;X;X;X;X;X;X;X;X;X;X;X;X;X;X	XXXXXXXPPPPPPPPPPPPXXXXXXXXXXXX	LFQGQPLKS(1)PNK	9	4	-0.04736			5384	5384	-1.38419	-1.25374	-1.46594	-2.26922	-2.3501	-2.40294	0.000183399	0.972794	1.96264
A0A1D6FA60	103648286	A0A1D6FA60;A0A1D6FA59;A0A1D6FA58	96;96;96	A0A1D6FA60	7.86e-10	82.382	1	S	WAKNLKIPQPSPGQESPTGKNTFARLTSGLG	X;X;X;X;X;X;X;X;X;X;X;X;X;X;X;Phospho (STY);X;X;X;X;X;X;X;X;X;X;X;Phospho (STY);X;X;X	XXXXXXPPPPPPPPPPPPPPXXXXXXXXXXX	IPQPSPGQES(0.998)PT(0.002)GK	10	3	-0.1289			4325;4326	4326	0.334259	0.365164	0.404797	-0.144842	-0.435415	-0.338007	0.00154652	0.674162	1.59567
A0A1D6MQ48	100274069	A0A1D6MQ48;C4JC53;B4FLN7;A0A3L6DN93;B4FYX0;A0A3L6FIJ4;A0A1D6FBT4	21;46;144;145;146;146;46	A0A1D6MQ48	1.16e-129	173.91	1	S	SVNRNRSTIIVPAGSSGEEGWEAFRSVLLEI	X;X;X;X;X;X;X;X;X;X;X;X;X;X;X;Phospho (STY);X;X;X;X;X;X;X;X;X;X;X;X;X;X;X	XXXXXXPPPPPPPPPPPPPPPPPPPXXXXXX	STIIVPAGS(0.145)S(0.855)GEEGWEAFR	10	3	-1.0496			8560;8561	8560	1.8236	1.80689	1.92686	1.17813	1.05135	1.16757	0.00020059	0.720101	1.6473
A0A1D6FQC3	100272847	A0A1D6FQC3;B6SUQ3;A0A1D6FQC2;B4FR51;A0A3L6DVE4;B6TU66	230;215;230;230;230;231	A0A1D6FQC3	4.13e-07	86.833	1;2	S	RRTPPDSPPRRYASVSPPRRHSISVTSMNMF	X;X;X;X;X;X;X;X;X;X;X;X;X;Phospho (STY);X;Phospho (STY);X;X;X;X;X;X;X;X;X;X;X;X;X;X;X	XXXXXXXXXXPPPPPPPPPPXXXXXXXXXXX	YASVS(1)PPRR	5	3	0.010703			7364;7365;10230;10231;10232;10233;10234;10235;10236;10237;10238;10239;10240;10241;10242;10243;10244;10245;10246;10247;10248	10236	4.07167	3.99206	4.03498	3.4034	3.19952	3.42383	0.000781013	0.690655	1.61402
A0A1D6FSY9	100383243	A0A1D6FSY9;A0A1D6FSZ6;A0A1D6FT11;A0A1D6FT39;A0A1D6FT31;A0A3L6DR16;A0A1D6FT02;A0A1D6FSZ7;A0A1D6FSZ1;A0A1D6FSZ8;K7VH66;C0PEF1;A0A1D6FT06	1208;961;1176;1175;1157;1118;1092;1031;1009;881;740;499;214	A0A1D6FSY9	1.09e-06	77.341	1	S	PESFRQDYNVFGLPFSPRGNLSDMEMASVRS	X;X;X;X;X;X;X;X;X;X;X;X;X;X;X;Phospho (STY);X;X;X;X;X;X;X;X;X;X;X;X;X;X;X	XXXXXPPPPPPPPPPPPPXXXXXXXXXXXXX	QDYNVFGLPFS(1)PR	11	3	0.99455			6671	6671	-3.26133	-3.24095	-2.64024	-4.32733	-4.06768	-4.01303	0.00849414	1.0885	2.12653
A0A1D6FYJ3	100191432	A0A1D6FYJ3;B6SRU8;B4F8T1;K7UZB4;A0A3L6DT49;A0A1D6NLA4;A0A1D6NLA9;C4J118;A0A3L6FN59;C0P9J1;A0A1D6NLB2;A0A1D6NLB1;A0A1D6NLA8	346;482;529;684;696;667;693;707;708;98;217;304;737	A0A1D6NLA4	0.000156261	66.632	1	S	DERQNKPRRYSEMNFSQ______________;DQRQNKPRRYSEMNFSQ______________	X;X;X;X;X;X;X;X;X;X;X;X;Oxidation (M);X;X;Phospho (STY);X;X;X;X;X;X;X;X;X;X;X;X;X;X;X	XXXXXXXXPPPPPPPPPXXXXXXXXXXXXXX	RYSEMNFS(1)Q	8	2	0.27617			7374	7374	0.377489	0.203428	0.261552	-1.625	-1.43349	-1.61498	2.18361e-05	1.83865	3.57675
A0A1D6FZ20	100382178	A0A1D6FZ20;C0P558;A0A3L6DMC9;A0A1D6FZ13;A0A1D6FZ15;A0A1D6FZ14	405;429;429;52;102;123	A0A1D6FZ20	0.00012514	70.533	1	S	LPGSGFRGHDPQGGMSPPGPGGRAPPMYPNV	X;X;X;X;X;X;X;X;X;X;X;X;X;X;Oxidation (M);Phospho (STY);X;X;X;X;X;X;X;X;X;X;X;X;X;X;X	XXXXXXXPPPPPPPPPPPPPPPPXXXXXXXX	GHDPQGGMS(1)PPGPGGR	9	3	0.71659			3349;3350;3351;3352	3352	0.176789	0.267573	0.643387	-0.242359	-0.293214	-0.478622	0.0118473	0.700647	1.62523
A0A1D6G2Z2	ZEAMMB73_Zm00001d011684	A0A1D6G2Z2;A0A1D6G2Z0;A0A1D6G2Z1;A0A1D6G2Y9;A0A3L6DMN5;A0A1D6G2Y6	272;358;377;384;605;605	A0A1D6G2Z2	0.0201928	25.878	1	S	HPYVYEMPTEPPRAHSPDPRFDDLYERESDI	X;X;X;X;X;X;X;X;X;X;X;X;X;X;X;Phospho (STY);X;X;X;X;X;X;X;X;X;X;X;X;Phospho (STY);X;X	XXXXXXXXXXXXXPPPPPPPXXXXXXXXXXX	AHS(1)PDPR	3	3	-0.83476			415	415	-3.28239	-3.16706	-3.04486	-4.60652	-4.31798	-4.22925	0.000783371	1.21981	2.32916
A0A1D6G2Z2	ZEAMMB73_Zm00001d011684	A0A1D6G2Z2;A0A1D6G2Z0;A0A1D6G2Z1;A0A1D6G2Y9;A0A3L6DMN5;A0A1D6G2Y6	430;516;535;542;763;763	A0A1D6G2Z2	1.18e-06	67.216	1	S	KQRTSALFSRTETQLSDNLGTNKSDIPSPHS	X;X;X;X;X;X;X;X;X;X;X;X;X;X;X;Phospho (STY);X;X;X;X;X;X;X;X;X;X;X;X;X;X;X	XXXXXXXXXXPPPPPPPPPPPPPXXXXXXXX	TET(0.002)QLS(0.998)DNLGTNK	6	2	-0.50071			8993;8994;8995	8994	1.12579	1.06754	1.05615	0.405723	0.349957	0.479534	0.000100814	0.671423	1.59264
B6U7U2	ZEAMMB73_Zm00001d012852	B6U7U2;B4G0G9;A0A1D6GD97;A0A1D6GD91;A0A3L6EQ34;A0A3L6EQE2	184;184;184;184;184;257	B6U7U2	9.57e-36	120.86	1	S	GSAVPKFGEWDEKDPSTGEGFTDIFNKVREE	X;X;X;X;X;X;X;X;X;X;X;X;X;X;X;Phospho (STY);X;X;X;X;X;X;X;X;X;X;X;X;X;X;X	XXXXXXPPPPPPPPPPPPPPPPPPPPPXXXX	FGEWDEKDPS(0.886)T(0.114)GEGFTDIFNK	10	4	1.3644			2176;2177	2176	2.05956	2.21745	2.16752	1.07771	1.02354	1.2153	0.00014476	1.04266	2.06002
C0HHX7	C3H27	C0HHX7;A0A3L6EQD3;A0A1D6GK17;A0A317YA52;A0A1D6L0C8	277;542;542;542;542	C0HHX7	4.06e-07	76.111	2	S	AAILNQFQQQQQALLSPINTGVYSPKAVDNK;AAILNQFQQQQQALLSPINTGVYSPKGVDNQ	X;X;X;X;X;X;X;X;X;X;X;X;X;X;X;Phospho (STY);X;X;X;X;X;X;X;Phospho (STY);X;X;X;X;X;X;X	PPPPPPPPPPPPPPPPPPPPPPPPPPXXXXX	AAILNQFQQQQQALLS(0.985)PINT(0.027)GVY(0.005)S(0.983)PK	16	3	0.10855			99;100	99	0.114929	0.00818225	0.0867082	-0.544551	-0.466626	-0.601751	0.000274277	0.607582	1.5237
C0HHX7	C3H27	C0HHX7;A0A3L6EQD3;A0A1D6GK17;A0A317YA52;A0A1D6L0C8	285;550;550;550;550	C0HHX7	4.06e-07	76.111	2	S	QQQQALLSPINTGVYSPKAVDNKQLPSHPSL;QQQQALLSPINTGVYSPKGVDNQQLPSHSSL	X;X;X;X;X;X;X;Phospho (STY);X;X;X;X;X;X;X;Phospho (STY);X;X;X;X;X;X;X;X;X;X;X;X;X;X;X	PPPPPPPPPPPPPPPPPPXXXXXXXXXXXXX	AAILNQFQQQQQALLS(0.985)PINT(0.027)GVY(0.005)S(0.983)PK	24	3	0.10855			99;100	99	0.114929	0.00818225	0.0867082	-0.544551	-0.466626	-0.601751	0.000274277	0.607582	1.5237
Q8LK06	mbd109	Q8LK06;C0PA71;A0A3L6ELM0;A0A1D6GLD8;Q5I204;A0A1D6KWW9;A0A317Y116	107;107;107;117;101;210;73	Q8LK06	5.7e-05	50.572	1	S	PRRSARLSEKVKATESPEGEKTPKRARSSSK;PRRSARLSEKVKATESPEGEKTPKRGRSSSK	X;X;X;X;X;X;X;X;X;X;X;X;X;X;X;Phospho (STY);X;X;X;X;X;X;X;X;X;X;X;X;X;X;X	XXXXXXXXXXXXPPPPPPPPPPPPXXXXXXX	AT(0.109)ES(0.891)PEGEKTPK	4	4	-0.22334			1022	1022	-0.837704	-1.11309	-1.1358	-1.87241	-1.39923	-1.84035	0.0200192	0.675133	1.59674
A0A1D6GME5	103626087	A0A1D6GME5;B6TMP5;A0A3L6F039	49;49;49	A0A1D6GME5	0.0025034	44.555	1	S	GHGKKSSKVVAAGGASPRSNGGKKPRPKKGA	X;X;X;X;X;X;X;X;X;X;X;X;X;X;X;Phospho (STY);X;X;X;X;X;X;X;X;X;X;X;X;X;X;X	XXXXXXXXPPPPPPPPPPXXXXXXXXXXXXX	VVAAGGAS(1)PR	8	2	0.74656			10069	10069	-1.623	-1.68468	-1.81798	-2.26179	-2.36247	-2.47973	0.00150769	0.659448	1.57948
A0A3L6EJV8	Zm00014a_028094	A0A3L6EJV8;A0A1D6GR03	54;54	A0A3L6EJV8	1.71e-12	86.938	1	S	IREMRKQNRRELSRASLGGGDDDDDDLLQKK	X;X;X;X;X;X;X;X;X;X;X;X;X;X;X;Phospho (STY);X;X;X;X;X;X;X;X;X;X;X;X;X;X;X	XXXXXXXXXXXXXXPPPPPPPPPPPPPPPPP	AS(1)LGGGDDDDDDLLQKK	2	3	0.44155			915;1917	915	1.3316	1.24133	1.42541	0.585688	0.678696	0.539087	0.000402682	0.731624	1.66051
A0A1D6GWT2	100381276	A0A1D6GWT2;Q5NKN3;P27347;A0A3L6ENE7	76;133;133;133	A0A1D6GWT2	2.41e-09	85.4	1	S	KKAPAKEEEEEDEEESDKSKSEVNDEDDEEG	X;X;X;X;X;X;X;X;X;X;X;X;X;X;X;Phospho (STY);X;X;X;X;X;X;X;X;X;X;X;X;X;X;X	XPPPPPPPPPPPPPPPPPXXXXXXXXXXXXX	KAPAKEEEEEDEEES(1)DK	15	4	-0.19198			4507	4507	-0.589359	-0.839068	-0.737429	-1.46046	-1.20731	-1.54482	0.00542443	0.682244	1.60463
B4FDJ3	100193029	B4FDJ3;A0A1D6GWU0;A0A1D6GWT5;A0A1D6GWU6;A0A1D6GWT7;A0A1D6GWU5;A0A1D6GWT9;A0A1D6GWT6;A0A3L6ERS4	200;475;1042;187;474;523;638;1048;1074	B4FDJ3	4.33e-06	72.582	1	S	LFDSGPSRAESPTASSMYGKEQKGFFDSSVP	X;X;X;X;X;X;X;X;X;X;X;X;X;X;X;Phospho (STY);Oxidation (M);X;X;X;X;X;X;X;X;X;X;X;X;X;X	XXXXXXXXPPPPPPPPPPPPXXXXXXXXXXX	AES(0.076)PT(0.036)AS(0.077)S(0.807)MY(0.005)GK	8	2	0.21985			273;274	274	1.70687	1.66685	1.56703	0.88329	0.273426	0.944586	0.0122818	0.946483	1.92717
C0P9H7	100281308	C0P9H7;B6SU77;B4FK94;A0A3L6ELP6;A0A1D6GYZ1;A0A1D6GYZ2	46;87;87;87;99;124	C0P9H7	0.000213133	40.899	1	S	TKEDRTVGRKSSSRRSPTNTKPTKTLFVINF	X;X;X;X;X;X;X;X;X;X;X;X;X;X;X;Phospho (STY);X;X;X;X;X;X;X;X;X;X;X;X;X;X;X	XXXXXXXXXXXXXXPPPPPPPPPPXXXXXXX	S(0.995)PT(0.004)NTKPTK	1	3	0.16989			7269;7270;7271;8229	8229	2.64519	2.66103	2.7145	2.13434	1.95078	2.13509	0.000755508	0.600172	1.5159
A0A1D6H268	100283381	A0A1D6H268;B6THU8;A0A3L6EJ05	53;53;53	A0A1D6H268	1.88e-42	119.79	1	S	ITKRKALPSILQKIPSNDLSHTIRGESVLQK	X;X;X;X;X;X;X;X;X;X;X;X;X;X;X;Phospho (STY);X;X;X;X;X;X;X;X;X;X;X;X;X;X;X	XXXXXXXXXXXXXPPPPPPPPPPPXXXXXXX	IPS(1)NDLSHTIR	3	3	0.11041			4330;4331;4332	4331	1.169	1.13727	1.18723	0.401315	0.460097	0.495345	2.14502e-05	0.712247	1.63835
A0A1D6H407	100382772	A0A1D6H407;C0PAH7;A0A3L6EL03	2;2;2	A0A1D6H407	0.00173169	38.772	1	S	______________MSGHGDTATSAKMAKLK	X;X;X;X;X;X;X;X;X;X;X;X;X;X;X;Phospho (STY);X;X;X;X;X;X;X;X;X;X;X;X;X;X;X	XXXXXXXXXXXXXXXPPPPPPPPPPPXXXXX	S(0.984)GHGDT(0.016)ATSAK	1	2	-0.47642			7722	7722	-3.14329	-3.76385	-3.61541	-4.93324	-4.15933	-4.2952	0.0345075	0.955073	1.93868
A0A1D6H4J1	ZEAMMB73_Zm00001d015895	A0A1D6H4J1;A0A3L6EPP2;B6SI05	70;70;70	A0A1D6H4J1	8.62e-06	69.548	1	S	TPIPQRAAPSPSLSPSPRNHESRAVAPAVVF	X;X;X;X;X;X;X;X;X;X;X;X;X;X;X;Phospho (STY);X;X;X;X;X;X;X;X;X;X;X;X;X;X;X	XXXXXXPPPPPPPPPPPPXXXXXXXXXXXXX	AAPSPSLS(0.074)PS(0.926)PR	10	2	-0.53713			124	124	-1.03152	-0.961751	-0.841437	-1.52275	-1.58541	-1.69537	0.000940735	0.656274	1.57601
A0A1D6H7J1	100303796	A0A1D6H7J1;A0A1D6H7I4;A0A1D6H7J0;A0A1D6H7I6;A0A1D6H7I5;B4FTP3;B6T3J6;A0A1D6H7I7;A0A3L6ETV0	179;179;179;179;179;179;179;179;179	A0A1D6H7J1	9.86e-05	72.396	1	S	RPREHDRTAEMHNVDSDNDKDKEHVSRKRFR	X;X;X;X;X;X;X;X;X;X;Oxidation (M);X;X;X;X;Phospho (STY);X;X;X;X;X;X;X;X;X;X;X;X;X;X;X	XXXXXXXPPPPPPPPPPPPPPPPPPPPXXXX	TAEMHNVDS(1)DNDKDKEHVSR	9	4	-0.75665			8844;8845	8845	-0.209196	-0.499453	-0.261814	-0.894237	-0.932335	-0.916644	0.00278007	0.590918	1.5062
A0A1D6H9E9	ZEAMMB73_Zm00001d016640	A0A1D6H9E9;A0A3L6EQV2	944;970	A0A1D6H9E9	8.73e-35	122	1	S	AKKERLRIWQYGDVESDEDEQAPAARKPGGR	X;X;X;X;X;X;X;X;X;X;X;X;X;X;X;Phospho (STY);X;X;X;X;X;X;X;X;X;X;X;X;X;X;X	XXXXXXXPPPPPPPPPPPPPPPPPPPXXXXX	IWQYGDVES(1)DEDEQAPAAR	9	3	0.038523			4457;4458	4457	1.40074	1.47655	1.3171	0.434982	0.311083	0.432684	8.25542e-05	1.00521	2.00724
A0A3L6EQA5	Zm00014a_023199	A0A3L6EQA5;A0A1D6HA56;C0PLR5	140;139;139	A0A3L6EQA5	8.4e-11	84.609	1;2	S	EFEPREFLLSPTAALSPAARLAAIERSVRPL	X;X;X;X;X;X;X;X;X;Phospho (STY);X;X;X;X;X;Phospho (STY);X;X;X;X;X;X;X;X;X;X;X;X;X;X;X	XXXXXPPPPPPPPPPPPPPPXXXXXXXXXXX	EFLLS(0.96)PT(0.04)AALS(1)PAAR	11	2	0.13859			1731;1734;1735;1736	1736	1.12958	1.21811	1.26939	0.604195	0.545774	0.671631	0.000395686	0.598497	1.51414
A0A1D6HCU4	100272442	A0A1D6HCU4;A0A1D6HCU2;B4F7Z5;B6U4H0;A0A1D6HCU9;A0A1D6HCU1;B8A221	150;166;201;203;79;192;179	A0A1D6HCU4	0.0132089	21.41	2	S	REVSRSPPPPPPRNNSRSPPAARDVSRSPPA	X;X;X;Phospho (STY);X;Phospho (STY);X;X;X;X;X;X;X;X;X;Phospho (STY);X;Phospho (STY);X;X;X;X;X;X;X;Phospho (STY);X;Phospho (STY);X;X;X	XXXXXXXXXXXXXPPPPPPPPPPXXXXXXXX	NNS(1)RS(1)PPAAR	3	2	-0.14108			6465	6465	-1.52946	-1.59312	-1.53534	-2.32971	-2.65282	-2.20673	0.00330145	0.843782	1.79475
A0A1D6HCU4	100272442	A0A1D6HCU4;A0A1D6HCU2;B4F7Z5;B6U4H0;A0A1D6HCU9;A0A1D6HCU1;B8A221	152;168;203;205;81;194;181	A0A1D6HCU4	0.0132089	21.41	2	S	VSRSPPPPPPRNNSRSPPAARDVSRSPPAAR	X;Phospho (STY);X;Phospho (STY);X;X;X;X;X;X;X;X;X;Phospho (STY);X;Phospho (STY);X;X;X;X;X;X;X;Phospho (STY);X;Phospho (STY);X;X;X;X;X	XXXXXXXXXXXPPPPPPPPPPXXXXXXXXXX	NNS(1)RS(1)PPAAR	5	2	-0.14108			6465	6465	-1.52946	-1.59312	-1.53534	-2.32971	-2.65282	-2.20673	0.00330145	0.843782	1.79475
A0A1D6HEB5	100274181	A0A1D6HEB5;A0A1D6HEA9;A0A1D6HEB2;A0A1D6HEB4;A0A1D6HEB6;B4FZF9;A0A1D6HEB3;A0A1D6HEC0;A0A1D6HEA5;A0A3L6ERP2	140;140;140;140;155;140;140;140;140;140	A0A1D6HEB5	0.00898063	31.238	1	S	SVNRDQRSINEGKQESPRGYQKNDGGEYNKH	X;X;X;X;X;X;X;X;X;X;X;X;X;X;X;Phospho (STY);X;X;X;X;X;X;X;X;X;X;X;X;X;X;X	XXXXXXXPPPPPPPPPPPXXXXXXXXXXXXX	S(0.001)INEGKQES(0.999)PR	9	3	0.14893			7851	7851	1.19878	1.31227	1.33604	0.251462	0.300948	0.466	0.000261425	0.942892	1.92238
A0A1D6HEX6	100502159	A0A1D6HEX6;Q05737;B4FQY4;B4FC26;A0A1D6Q6B9;A0A1D6HEX4;A0A1D6HEW6;A0A1D6HEW7;K7UHM3;A0A3L6F1U0;A0A3L6EU89;A0A1D6HEW8	88;36;36;36;47;63;67;74;105;167;74;67	A0A1D6HEX6	0.000255679	16.489	1	S	KSCLLLRFADDSYLDSYISTIGVDFKIRTVE	X;X;X;X;X;X;X;X;X;X;X;X;X;X;X;Phospho (STY);X;X;X;X;X;X;X;X;X;X;X;X;X;X;X	XXXXXXXPPPPPPPPPPPPPPPPPPPXXXXX	FADDS(0.001)YLDS(0.807)Y(0.135)IS(0.025)T(0.032)IGVDFK	9	3	1.2643			2077	2077	-1.56127	-1.43637	-1.36907	-2.32785	-2.01058	-2.38566	0.00372309	0.785789	1.72403
A0A1D6HIH2	ZEAMMB73_Zm00001d017862	A0A1D6HIH2;A0A3L6EQL1;A0A1D6HIH1	447;711;743	A0A1D6HIH2	0.00246457	31.047	1	S	QTQHPNGSTENVVRKSPNRELYEEKSGRL__	X;X;X;X;X;X;X;X;X;X;X;X;X;X;X;Phospho (STY);X;X;X;X;X;X;X;X;X;X;X;X;X;X;X	XXXXXXXXXXXXXXPPPPPPPPPPPXXXXXX	KS(1)PNRELYEEK	2	3	1.2891			5111	5111	1.18618	1.07205	1.22335	0.0931976	0.105097	0.0797241	2.05956e-05	1.06786	2.09632
A0A1D6HMV4	103627843	A0A1D6HMV4;A0A1D6HMV3;A0A1D6HMV0;A0A1D6HMV2;A0A1D6HMV1;A0A3L6EUP5	123;123;123;123;123;130	A0A1D6HMV4	0.0220672	28.506	2	S	LKLPLLSDKADGKQDSVKTLPKTLGSIRDER	X;X;X;X;X;X;X;X;X;X;X;X;X;X;X;Phospho (STY);X;X;Phospho (STY);X;X;X;X;X;X;X;X;X;X;X;X	XXXXXXXXXPPPPPPPPPPPPPXXXXXXXXX	ADGKQDS(1)VKT(1)LPK	7	4	-0.58801			198	198	-0.178202	-0.103423	-0.0319381	-0.604736	-0.830351	-0.655603	0.00180139	0.592376	1.50773
A0A1D6HN32	103627850	A0A1D6HN32;A0A1D6HN30;A0A1D6HN31;A0A1D6HN35;A0A1D6HN34	1239;1311;1315;823;1151	A0A1D6HN32	1.24e-12	64.638	2	S	TAVSSNTGENSFNLNSKPASPAIATAAAKVI	X;X;X;X;X;X;X;X;X;X;X;X;X;X;X;Phospho (STY);X;X;X;Phospho (STY);X;X;X;X;X;X;X;X;X;X;X	PPPPPPPPPPPPPPPPPPPPPPPPPPPPPXX	AVSTAVSSNT(0.002)GENS(0.371)FNLNS(0.8)KPAS(0.8)PAIAT(0.027)AAAK	19	4	-3.5457			1227	1227	1.17262	1.23186	1.19702	0.453968	0.380225	0.367552	1.51262e-05	0.799916	1.741
A0A1D6HN32	103627850	A0A1D6HN32;A0A1D6HN30;A0A1D6HN31;A0A1D6HN35;A0A1D6HN34	1243;1315;1319;827;1155	A0A1D6HN32	4.51e-195	220.95	1;2	S	SNTGENSFNLNSKPASPAIATAAAKVIPSTT	X;X;X;X;X;X;X;X;X;X;X;Phospho (STY);X;X;X;Phospho (STY);X;X;X;X;X;X;X;X;X;X;X;X;X;Phospho (STY);Phospho (STY)	PPPPPPPPPPPPPPPPPPPPPPPPPXXXXXX	AVSTAVSSNTGENSFNLNS(0.008)KPAS(0.992)PAIATAAAK	23	4	-0.71421			1223;1224;1227	1224	3.09603	3.0937	3.14037	1.72874	1.74489	1.61329	5.65071e-06	1.41439	2.66548
A0A1D6HS00	103631932	A0A1D6HS00;A0A1D6HS10;A0A3L6DYG6;A0A1D6HS02;A0A1D6HS05;A0A1D6HS03	40;40;37;53;40;40	A0A1D6HS00	4.84e-05	64.25	1	S	QIAREKQGLDTEIPLSPQWLMKVGENKDPVS	X;X;X;X;X;X;X;X;X;X;X;X;X;X;X;Phospho (STY);X;X;X;X;Oxidation (M);X;X;X;X;X;X;X;X;X;X	XXXXPPPPPPPPPPPPPPPPPPXXXXXXXXX	EKQGLDTEIPLS(1)PQWLMK	12	4	0.64788			1855;1856;1857;6689	1856	2.27646	2.10499	2.1788	1.38181	1.48647	1.30872	0.000375381	0.794416	1.73438
A0A1D6I4C9	100284712	A0A1D6I4C9;B6TWQ1;A0A3L6E3S9	101;105;105	A0A1D6I4C9	0.00415004	33.969	1	S	FYRLRSSLRVKQQHASLLDLRDFDRAKFDVE	X;X;X;X;X;X;X;X;X;X;X;X;X;X;X;Phospho (STY);X;X;X;X;X;X;X;X;X;X;X;X;X;X;X	XXXXXXXXXXXPPPPPPPPPPXXXXXXXXXX	QQHAS(1)LLDLR	5	3	0.40351			6806	6806	-2.58378	-2.60775	-2.6198	-3.00295	-3.63572	-3.06202	0.0356464	0.629782	1.54733
A0A3L6DUW3	Zm00014a_037801	A0A3L6DUW3;A0A1D6IBF9;B6UF14;A0A1D6IBG0;A0A1D6IBG2;B6TFS3;B6TFL2;A0A1D6IBF8	22;22;13;13;14;85;22;63	A0A3L6DUW3	0.000234012	59.6	1	S	LYGSSGCIGNLSRSQSLPDSKPKRSLRKKYQ	X;X;X;X;X;X;X;X;X;X;X;X;X;X;X;Phospho (STY);X;X;X;X;X;X;X;X;X;X;X;X;X;X;X	XXXXXXXXXXXXXPPPPPPPPPPXXXXXXXX	S(0.101)QS(0.824)LPDS(0.074)KPK	3	3	0.0104			8273	8273	0.448764	0.263237	0.219481	-0.526488	-0.368881	-0.609475	0.00123078	0.812109	1.75578
A0A1D6IE72	ZEAMMB73_Zm00001d021710	A0A1D6IE72;A0A1D6IE79;A0A3L6E3Z6;A0A1D6IE73;A0A1D6IE71;B4FXD6	342;359;397;397;397;72	A0A1D6IE72	1.02e-106	183.14	1	S	KERGVDVLASDLERISPVGRSKGEFAKVEQK	X;X;X;X;X;X;X;X;X;X;X;X;X;X;X;Phospho (STY);X;X;X;X;X;X;X;X;X;X;X;X;X;X;X	XXXPPPPPPPPPPPPPPPPPXXXXXXXXXXX	GVDVLASDLERIS(1)PVGR	13	3	0.86732			3717	3717	1.78046	1.77432	1.83675	0.978545	1.29349	0.935136	0.00314931	0.728122	1.65648
A0A1D6IE72	ZEAMMB73_Zm00001d021710	A0A1D6IE72;A0A1D6IE79;A0A3L6E3Z6;A0A1D6IE73;A0A1D6IE71;A0A1D6IE78;A0A1D6IE81;A0A1D6IE74;A0A1D6IE75	117;134;134;134;134;134;134;134;134	A0A1D6IE72	1.5e-05	56.579	2	S	GSGNAWGPRKEASPASSPVGPAPASAGGQIW	X;X;X;X;X;X;X;X;X;X;X;X;X;X;X;Phospho (STY);Phospho (STY);X;X;X;X;X;X;X;X;X;X;X;X;X;X	XXXXXXXXXPPPPPPPPPPPPPPPPPPPPPP	KEAS(0.172)PAS(0.91)S(0.918)PVGPAPASAGGQIWSATR	7	3	0.0063584			4558	4558	0.0375724	0.118767	0.319143	-0.946103	-1.15342	-1.32766	0.00071459	1.30089	2.4638
A0A1D6IE72	ZEAMMB73_Zm00001d021710	A0A1D6IE72;A0A1D6IE79;A0A3L6E3Z6;A0A1D6IE73;A0A1D6IE71;A0A1D6IE78;A0A1D6IE81;A0A1D6IE74;A0A1D6IE75	118;135;135;135;135;135;135;135;135	A0A1D6IE72	9.26e-07	60.713	1;2	S	SGNAWGPRKEASPASSPVGPAPASAGGQIWS	X;X;X;X;X;X;X;X;X;X;X;Phospho (STY);X;X;Phospho (STY);Phospho (STY);X;X;X;X;X;X;X;X;X;X;X;X;X;X;X	XXXXXXXXPPPPPPPPPPPPPPPPPPPPPPP	KEAS(0.172)PAS(0.91)S(0.918)PVGPAPASAGGQIWSATR	8	3	0.0063584			4555;4557;4558	4558	1.00475	1.21147	1.2336	0.378367	0.531147	0.383686	0.00124481	0.718874	1.6459
A0A1D6IE72	ZEAMMB73_Zm00001d021710	A0A1D6IE72;A0A1D6IE79;A0A3L6E3Z6;A0A1D6IE73;B4FXD6	474;491;529;529;204	A0A1D6IE72	0.000824604	67.539	1	S	SMSDTAPQNRLTSVPSPRVPLSPGARDQSGF	X;X;X;X;X;X;X;X;X;X;X;X;X;X;X;Phospho (STY);X;X;X;X;X;Phospho (STY);X;X;X;X;X;X;X;X;X	XXXXXXXXXXPPPPPPPPXXXXXXXXXXXXX	LTSVPS(1)PR	6	2	-0.31428			5994;5995	5994	1.12739	1.13459	1.24679	0.226469	0.214062	0.251105	1.98278e-05	0.939043	1.91726
A0A1D6IE72	ZEAMMB73_Zm00001d021710	A0A1D6IE72;A0A1D6IE79;A0A3L6E3Z6;A0A1D6IE73;A0A1D6IE71;A0A1D6IE78;A0A1D6IE81;A0A1D6IE74;A0A1D6IE75	239;256;256;256;256;256;256;256;256	A0A1D6IE72	2.25e-18	104.11	1	S	LKLLPRSKPIEAPEPSPTYVAEKQVHQVQVT	X;X;X;X;X;X;X;X;X;X;X;X;X;X;X;Phospho (STY);X;X;X;X;X;X;X;X;X;X;X;X;X;X;X	XXXXXXPPPPPPPPPPPPPPPPPXXXXXXXX	SKPIEAPEPS(0.927)PT(0.073)YVAEK	10	3	-0.15341			7914;7915	7915	1.9574	1.79388	2.02416	0.38052	0.485525	0.420653	3.71215e-05	1.49625	2.82108
A0A1D6IE72	ZEAMMB73_Zm00001d021710	A0A1D6IE72;A0A1D6IE79;A0A3L6E3Z6;A0A1D6IE73;B4FXD6	480;497;535;535;210	A0A1D6IE72	1.37e-06	69.391	1	S	PQNRLTSVPSPRVPLSPGARDQSGFSRLTDS	X;X;X;X;X;X;X;X;X;Phospho (STY);X;X;X;X;X;Phospho (STY);X;X;X;X;X;X;X;X;X;X;X;X;X;X;X	XXXXXXXXXXXXPPPPPPPPXXXXXXXXXXX	VPLS(1)PGAR	4	2	0.26887			9844	9844	1.08044	1.14298	1.2569	-0.213141	-0.473647	-0.369857	7.90158e-05	1.51232	2.85269
B6U5A1	Zm00014a_018423	B6U5A1;B6TRA1;A0A3L6E6W8;A0A1D6IJ02	10;10;10;91	B6U5A1	1.24e-07	73.954	1;2	S	______MHRQLSLSASPKQQQPPPDGTSTGG	X;X;X;X;X;X;X;X;X;X;X;Phospho (STY);X;X;X;Phospho (STY);X;X;X;X;X;X;X;X;X;X;X;X;X;X;X	XXXXXXXXXPPPPPPPPPXXXXXXXXXXXXX	QLSLS(0.01)AS(0.99)PK	7	2	1.238			6752;6755	6752	1.92962	1.96414	2.08937	1.12802	0.952999	1.03647	0.000167682	0.955213	1.93887
A0A1D6IK79	100383636	A0A1D6IK79;A0A3L6DUZ7;C0PHZ4;A0A1D6IK75;A0A1D6IK73	83;147;171;171;171	A0A1D6IK79	0.0027494	30.24	1	S	YRDRDYRHRSPSRSYSPDDYKKRGRDSLSPE	X;X;X;X;X;X;X;X;X;X;X;X;X;X;X;Phospho (STY);X;X;X;X;X;X;X;X;X;X;X;X;X;X;X	XXXXXXXXXXXXXPPPPPPPPPXXXXXXXXX	S(0.049)Y(0.011)S(0.923)PDDY(0.017)KK	3	3	0.212			8800;8801	8801	1.18502	1.19783	1.24507	-0.315913	-0.405336	-0.435813	2.44663e-06	1.59499	3.02093
A0A1D6IME9	ZEAMMB73_Zm00001d022414	A0A1D6IME9;A0A3L6DWF9;A0A1D6IME8	22;29;29	A0A1D6IME9	0.0047506	24.787	1	S	FTEDETKLLQGQPLKSPTKSVSKECERTEIQ	X;X;X;X;X;X;X;X;X;X;X;X;X;X;X;Phospho (STY);X;X;X;X;X;X;X;X;X;X;X;X;X;X;X	XXXXXXXPPPPPPPPPPPPXXXXXXXXXXXX	LLQGQPLKS(0.989)PT(0.011)K	9	3	0.39674			5634	5634	-0.573052	-0.579003	-0.584657	-1.67068	-1.27487	-1.49901	0.00140667	0.902615	1.86945
A0A1D6IYY5	100282999	A0A1D6IYY5;A0A1D6IYY2;B6TDL6;A0A3L6G6S3;A0A1D6Q0B0;A0A1D6Q0A7;B4G0P6;A0A3L6EYM2	190;190;190;190;173;173;173;173	A0A1D6Q0B0	2.86e-07	81.627	1;2	S	ITSGQLNSSGAQRKVSGPLDSSVSMKMRTTS;ITSGQLNSSGAQRKVSGPLDSSVSMKMRVTS	X;X;X;X;X;X;X;X;X;X;X;X;X;X;X;Phospho (STY);X;X;X;X;X;X;X;Phospho (STY);Oxidation (M);X;X;X;Phospho (STY);X;X	XXXXXXXXXXXXXPPPPPPPPPPPPPXXXXX	KVS(1)GPLDSSVSMK	3	4	0.075946			5188;5193;5194	5188	1.78284	1.78853	1.79876	1.2008	1.19633	1.1802	1.73792e-07	0.5976	1.5132
A0A1D6J2R3	100281740	A0A1D6J2R3;C0P6A5;A0A3L6GC72;B6SYA5	109;109;109;109	A0A1D6J2R3	0.000868114	62.277	1	S	SFMLRQTVKSLLPLGSFKSSAVKSYEASISK	X;X;X;X;X;X;X;X;X;X;X;X;X;X;X;Phospho (STY);X;X;X;X;X;X;X;X;X;X;X;X;X;X;X	XXXXXXXXXPPPPPPPPPXXXXXXXXXXXXX	SLLPLGS(1)FK	7	2	-1.1408			8007;8008	8007	0.033014	0.0639516	0.22669	-0.569656	-0.496821	-0.3885	0.00175748	0.592878	1.50825
A0A1D6J4K2	542174	A0A1D6J4K2;B4FMQ0;Q6IVD5;A0A3L6GC33;A0A1D6J4J9	54;102;204;204;232	A0A1D6J4K2	1.95e-26	124.2	2	S	PAYRSRPSPDYGRPASPVYGSYGRSRSPVRD	X;X;X;X;X;X;X;Phospho (STY);X;X;X;X;X;X;X;Phospho (STY);X;X;X;X;X;X;X;X;X;X;X;X;X;X;X	XXXXPPPPPPPPPPPPPPPPPPPPXXXXXXX	S(0.341)RPS(0.659)PDYGRPAS(0.996)PVYGS(0.004)YGR	12	3	-0.45994			8290	8290	1.18137	1.11041	0.927038	0.393612	0.0844937	0.317008	0.00252907	0.8079	1.75066
A0A1D6J8T6	103641776	A0A1D6J8T6;A0A1D6J8U1;A0A1D6J8T7;A0A1D6J8U3;A0A1D6J8U5;A0A1D6J8T5;A0A1D6J8T2;A0A1D6J8T8;A0A1D6J8U8;A0A1D6J8U7;A0A1D6J8U4;K7TQ63;A0A1D6J8T4;A0A3L6GBV8;A0A1D6J8T3	778;924;1091;1068;1151;1315;1282;1315;1398;1398;1398;1398;1440;1440;1440	A0A1D6J8T6	2.35e-06	71.253	2	S	ASRKVGSGAIFNDSISEGSGDELDTKTVMER	X;X;X;X;X;X;X;X;X;X;X;X;X;X;X;Phospho (STY);X;X;Phospho (STY);X;X;X;X;X;X;X;X;X;X;X;X	XXXPPPPPPPPPPPPPPPPPPPPPPPXXXXX	KVGSGAIFNDS(0.104)IS(0.898)EGS(0.997)GDELDTK	13	3	0.70591			5158	5158	0.841382	0.950888	0.871078	0.21467	0.329068	0.253256	0.000186422	0.622118	1.53913
A0A1D6JD26	ZEAMMB73_Zm00001d026150	A0A1D6JD26;C0PB30;C0PJ20;B6TB94;A0A3L6G6D9;A0A3L6FW19;A0A1D6JDE0;A0A317YFS2;A0A1D6KJ52;A0A3L6DD87;A0A3L6FTS7;Q7FS90	75;115;142;146;146;146;146;153;160;248;376;424	A0A1D6JD26	0.000422522	20.444	1	S	DEKHQLTSTATARVSSFDKRIGLSEKISVGT	X;X;X;X;X;X;X;X;X;X;X;X;X;X;X;Phospho (STY);X;X;X;X;X;X;X;X;X;X;X;X;X;X;X	XXXXXXXXXXXXXPPPPPPPXXXXXXXXXXX	VS(0.017)S(0.983)FDKR	3	2	0.21137			9948	9948	0.55516	0.671514	0.790457	0.242358	-0.0673432	-0.0833639	0.00699285	0.641827	1.5603
A0A1D6JFY9	103642120	A0A1D6JFY9;A0A1D6JFX8;A0A1D6JFR7;A0A1D6JFP9;A0A3L6G9M4;A0A1D6JFP8;A0A1D6JFV7;A0A1D6JFT9;A0A1D6JFU2;A0A1D6JFW6;A0A1D6JFX3;A0A1D6JFX5;A0A1D6JFX7;A0A1D6JFY0;A0A1D6JFX9;A0A1D6JFZ1;A0A1D6JFW7;A0A1D6JFS0;A0A1D6JFS5;A0A1D6JFT0;A0A1D6JFR8;A0A1D6JFY5;A0A1D6JFY8;A0A1D6JFU1;A0A1D6JFX4;A0A1D6JFY1;A0A1D6JFZ0;A0A1D6JFQ5;A0A1D6JFY7;A0A3L6FPB5;A0A1D6DWE7;A0A1D6DW96;A0A1D6DW97;A0A1D6DW94;A0A1D6DWA4;A0A1D6DW95;A0A…	96;767;1355;1334;1319;1311;1188;1185;1123;1089;1017;950;859;791;747;115;710;660;659;630;595;655;382;333;332;232;199;1385;576;1365;115;1358;1349;1184;1187;1184;1088;1016;949;858;790;96;754;746;713;650;647;614;594;381;331;231;766;575	A0A1D6JFY9	8.17e-31	134.31	1	S	TSIASKFISYKDVAVSPPGTVLKPILEKKEA	X;X;X;X;X;X;X;X;X;X;X;X;X;X;X;Phospho (STY);X;X;X;X;X;X;X;X;X;X;X;X;X;X;X	XXXXXXXXXXXPPPPPPPPPPPPPPPPPXXX	DVAVS(1)PPGTVLKPILEK	5	4	-0.63854			1597;1598;1599;1600	1600	2.96396	2.83732	2.76474	2.20478	1.95427	2.15389	0.0014462	0.751023	1.68299
A0A1D6JLS1	100501751	A0A1D6JLS1;A0A1D6JLS0;A0A317Y3R9;C4J5M4;A0A317Y4P2;A0A3L6DDZ8;A0A3L6DED3;C0PFK7;A0A3L6DEW2;A0A3L6DFC5	125;125;159;100;100;100;100;125;125;125	A0A3L6DDZ8	2.1e-31	115.6	1	S	RPTPSKWDDAEKWISSPTSNRTGRAGPTAGA;RPTPSKWDDAEKWISSPTSNRTGRAGPTAGT	X;X;X;X;X;X;X;X;X;X;X;X;X;X;X;Phospho (STY);X;X;X;X;X;X;X;X;X;X;X;X;X;X;X	XXXXXXXXXXXXPPPPPPPPPXXXXXXXXXX	WIS(0.019)S(0.979)PT(0.003)SNR	4	2	-0.5376			10165	10165	0.832646	0.930368	0.933785	-0.0038522	0.144842	-0.0407442	0.000191814	0.865518	1.82199
A0A1D6JMK4	ZEAMMB73_Zm00001d027503	A0A1D6JMK4;B4FHS7;A0A1D6JML3;A0A1D6JMM4;A0A1D6JMK6;A0A1D6JMM3;A0A1D6JML2;B7ZX43;A0A317Y4P9;A0A1D6JMN9;A0A1D6PJG6;A0A1D6PJD2;A0A1D6PJE0;A0A1D6PJG1;A0A1D6PJF1;A0A1D6PJG0;A0A1D6PJE9;K7VLM3;A0A3L6DC31	83;130;222;379;815;824;843;848;849;848;855;84;223;228;379;838;850;855;855	A0A1D6JMK4	0.00152862	42.982	1	S	ESVRSPGSAGRSASGSPFKSSGFGMHDSSPS;ESVRSPGSAGRSASGSPFKSSRFGMHDSSPS	X;Phospho (STY);X;X;X;X;X;X;X;X;X;X;X;X;X;Phospho (STY);X;X;X;X;X;X;X;X;X;X;X;X;X;X;X	XXXXXXXXXXXPPPPPPPPXXXXXXXXXXXX	SAS(0.002)GS(0.998)PFK	5	2	-0.31665			7491	7491	-0.144304	0.0307493	-0.172344	-0.848797	-0.744874	-0.868142	0.000613067	0.725305	1.65325
A0A317YD07	Zm00014a_010389	A0A317YD07;A0A1D6JQ48;B8A215;B6SLH7	55;55;58;59	A0A317YD07	4.68e-165	216.22	1	S	IREMRKQNKKELSRASLGGDDDLLAHAQKPQ	X;X;X;X;X;X;X;X;X;X;X;X;X;X;X;Phospho (STY);X;X;X;X;X;X;X;X;X;X;X;X;X;X;X	XXXXXXXXXXPPPPPPPPPPPPPPPPPPPPP	AS(1)LGGDDDLLAHAQKPQPSIAPPK	2	5	-0.86318			914;1916	914	1.404	1.16837	1.33443	-0.678524	-0.488125	-1.00902	0.000266943	2.02749	4.07694
A0A1D6JQG0	100279000	A0A1D6JQG0;A0A1D6JQG1;A0A1D6JQF9;A0A1D6JQF6;A0A1D6JQF4;C0P8G0;A0A317Y1S6;C0P868;A0A1D6JQH1;A0A1D6JQH7;A0A1D6JQH8;A0A1D6JQH0;A0A1D6JQG3	159;159;159;159;159;159;159;159;159;159;159;159;159	A0A1D6JQG0	8.06e-19	100.36	1;2	S	SGPTYMDERSQAAILSPTAGSMSPNAAPWVK	X;X;X;X;X;X;X;X;X;X;X;X;X;X;X;Phospho (STY);X;X;X;X;X;Oxidation (M);Phospho (STY);X;X;X;X;X;X;X;X	XXXXXXXXXPPPPPPPPPPPPPPPPPPPPPP	S(0.005)QAAILS(0.952)PT(0.043)AGS(0.035)MS(0.965)PNAAPWVK	7	3	0.54996			8239;8240;8241	8241	2.55169	2.46911	2.60906	1.88786	1.95342	1.96323	0.000205508	0.608448	1.52462
A0A1D6JQG0	100279000	A0A1D6JQG0;A0A1D6JQG1;A0A1D6JQF9;A0A1D6JQF6;A0A1D6JQF4;C0P8G0;A0A317Y1S6;C0P868;A0A1D6JQH1;A0A1D6JQH7;A0A1D6JQH8;A0A1D6JQH0;A0A1D6JQG3	166;166;166;166;166;166;166;166;166;166;166;166;166	A0A1D6JQG0	3.09e-05	64.782	2	S	ERSQAAILSPTAGSMSPNAAPWVKNLRNGGH	X;X;X;X;X;X;X;X;Phospho (STY);X;X;X;X;X;Oxidation (M);Phospho (STY);X;X;X;X;X;X;X;X;X;X;X;X;X;X;X	XXPPPPPPPPPPPPPPPPPPPPPPXXXXXXX	S(0.005)QAAILS(0.952)PT(0.043)AGS(0.035)MS(0.965)PNAAPWVK	14	3	0.54996			8241	8241	1.17175	1.11548	1.29902	0.401791	0.489191	0.567665	0.000608868	0.709199	1.6349
A0A1D6JQQ6	541658	A0A1D6JQQ6;A0A1D6JQQ7;A0A317YFU8;A0A1D6JQQ5;O81105	63;363;404;405;353	A0A1D6JQQ6	1.09e-38	125.93	2	S	PKIERNKSFDDDDDFSNKLVAKKSNITPINA	X;X;X;X;X;X;X;Phospho (STY);X;X;X;X;X;X;X;Phospho (STY);X;X;X;X;X;X;X;X;X;X;X;X;X;X;X	XXXXXPPPPPPPPPPPPPPPPPXXXXXXXXX	NKS(1)FDDDDDFS(1)NKLVAK	11	5	-0.00092796			6398;6399;6400	6400	3.22211	3.20238	3.04025	2.38028	2.50386	2.35722	0.000542279	0.741128	1.67148
A0A1D6JS17	ZEAMMB73_Zm00001d028097	A0A1D6JS17;B6TIS5;A0A1D6JS16;B8A1G9;A0A317YJB7;A0A1D6JS15	195;305;305;318;318;332	A0A1D6JS17	2.57e-55	146.68	1	S	QEEKWKHDLYDQTNRSPPPKTEEEQIAKVEA	X;X;X;X;X;X;X;X;X;X;X;X;X;X;X;Phospho (STY);X;X;X;X;X;X;X;X;X;X;X;X;X;X;X	XXXXXXPPPPPPPPPPPPPPPPPPPPPPXXX	HDLYDQT(0.024)NRS(0.976)PPPKTEEEQIAK	10	4	-0.052974			3808;3809	3808	2.11866	2.10318	2.31349	1.35592	0.517694	1.16972	0.011456	1.164	2.24077
A0A1D6JXU1	100304415	A0A1D6JXU1;A0A1D6JXT8;A0A1D6JXR7;A0A1D6JXU6;A0A1D6JXS7;A0A1D6JXS1;A0A1D6JXT9;A0A1D6JXU5;A0A1D6JXR9;A0A317Y762	647;493;642;636;598;550;546;265;81;81	A0A1D6JXU1	5.35e-43	132.86	1;2	S	QPKKISAGDSSPRDKSPFILQQSGKVVQKKH	X;X;X;X;X;X;X;X;X;Phospho (STY);Phospho (STY);X;X;X;X;Phospho (STY);X;X;X;X;X;X;X;X;X;X;X;X;X;X;X	XXXXPPPPPPPPPPPPPPPPPPPPPXXXXXX	DKS(1)PFILQQSGK	3	3	0.073621			1414;4357	1414	3.08079	3.11367	3.1301	2.14409	1.35465	2.07286	0.00774033	1.25099	2.38004
A0A1D6JXU1	100304415	A0A1D6JXU1;A0A1D6JXT8;A0A1D6JXR7;A0A1D6JXU6;A0A1D6JXS7;A0A1D6JXS1;A0A1D6JXT9;A0A1D6JXU5;A0A1D6JXR9;A0A317Y762;A0A1D6JXT4;C0HFJ3;A0A1D6JXU7	723;569;718;712;674;626;622;341;157;157;118;8;8	A0A1D6JXU1	3.23e-09	67.889	1	S	GGRNSEHVMRGLRDDSDDAIDTKKYLSKVNE	X;X;X;X;X;X;X;X;X;X;X;X;X;X;X;Phospho (STY);X;X;X;X;X;X;X;X;X;X;X;X;X;X;X	XXXXXXXXXXPPPPPPPPPPPPPPXXXXXXX	GLRDDS(1)DDAIDTKK	6	4	0.2029			3459;3460;3461;3462	3461	2.71905	2.65326	2.62549	2.14981	2.13833	1.82674	0.00457323	0.627637	1.54503
A0A1D6JXU1	100304415	A0A1D6JXU1;A0A1D6JXT8;A0A1D6JXR7;A0A1D6JXU6;A0A1D6JXS7;A0A1D6JXS1;A0A1D6JXT9;A0A1D6JXU5;A0A1D6JXS6;A0A1D6JXR9;A0A317Y762	642;488;637;631;593;545;541;260;637;76;76	A0A1D6JXU1	4.35e-06	69.94	1;2	S	LSAGLQPKKISAGDSSPRDKSPFILQQSGKV	X;Phospho (STY);X;X;X;X;X;X;X;X;X;X;X;X;Phospho (STY);Phospho (STY);X;X;X;X;Phospho (STY);X;X;X;X;X;X;X;X;X;X	XXXXXXXXPPPPPPPPPPPPPPPPPPPPPPX	IS(0.237)AGDS(0.832)S(0.832)PRDKS(0.099)PFILQQSGK	7	4	-0.70867			4356;4833;4835	4356	2.75462	2.64892	2.59466	1.96615	2.07971	1.96966	0.000385257	0.660896	1.58106
A0A1D6JXU1	100304415	A0A1D6JXU1;A0A1D6JXT8;A0A1D6JXR7;A0A1D6JXU6;A0A1D6JXS7;A0A1D6JXS1;A0A1D6JXT9;A0A1D6JXU5;A0A1D6JXS6;A0A1D6JXT7	471;317;466;460;422;374;370;89;466;374	A0A1D6JXU1	0.00746238	33.779	2	S	PGRRRPWSRSPIRRQSPSPKRQRTSPSSPKT	X;X;X;X;X;X;X;X;X;X;X;X;X;X;X;Phospho (STY);X;Phospho (STY);X;X;X;X;X;Phospho (STY);X;X;Phospho (STY);X;X;X;X	XXXXXXXXXXXXXPPPPPPPXXXXXXXXXXX	RQS(1)PS(1)PK	3	2	-0.24703			7216	7216	-0.134889	-0.456706	-0.383382	-1.01605	-1.12835	-1.0339	0.00207722	0.734441	1.66375
A0A1D6JXU1	100304415	A0A1D6JXU1;A0A1D6JXT8;A0A1D6JXR7;A0A1D6JXU6;A0A1D6JXS7;A0A1D6JXS1;A0A1D6JXT9;A0A1D6JXU5;A0A1D6JXS6;A0A1D6JXT7	473;319;468;462;424;376;372;91;468;376	A0A1D6JXU1	0.00746238	33.779	2	S	RRRPWSRSPIRRQSPSPKRQRTSPSSPKTRS	X;X;X;X;X;X;X;X;X;X;X;X;X;Phospho (STY);X;Phospho (STY);X;X;X;X;X;Phospho (STY);X;X;Phospho (STY);X;X;X;X;X;X	XXXXXXXXXXXPPPPPPPXXXXXXXXXXXXX	RQS(1)PS(1)PK	5	2	-0.24703			7216	7216	-0.134889	-0.456706	-0.383382	-1.01605	-1.12835	-1.0339	0.00207722	0.734441	1.66375
A0A1D6JXU1	100304415	A0A1D6JXU1;A0A1D6JXT8;A0A1D6JXR7;A0A1D6JXU6;A0A1D6JXS7;A0A1D6JXS1;A0A1D6JXS6;A0A1D6JXT7	295;141;290;284;246;198;290;198	A0A1D6JXU1	4.35e-07	53.157	1	S	SPYSRRGSPSLSRYPSPFTRRRSPLRRKSPS	X;X;X;X;X;X;X;Phospho (STY);X;X;X;X;X;X;X;Phospho (STY);X;X;X;X;X;X;X;X;X;X;X;X;X;X;X	XXXXXXXXXXXXXPPPPPPPXXXXXXXXXXX	YPS(0.999)PFTR	3	2	0.37042			10365;10366;10367	10366	1.55876	1.54134	1.52119	1.02784	0.817769	0.887063	0.000554863	0.629543	1.54707
A0A1D6JYN5	100276530	A0A1D6JYN5;A0A1D6JYN3;A0A317Y9R6;B6TDH3;A0A1D6JYN2	50;103;83;103;103	A0A1D6JYN5	8.6e-104	141.35	1;2	S	EEEKKKSRAERFGLASPSSSDEEAKKKARLE	X;X;X;X;X;X;X;X;X;X;X;X;X;X;X;Phospho (STY);X;X;Phospho (STY);X;X;X;X;X;X;X;X;X;X;X;X	XXXXXXXXXXXPPPPPPPPPPPPPPPPXXXX	FGLAS(0.998)PS(0.002)SSDEEAK	5	2	-0.022626			2187;2188;2189;2192;2194;2195	2187	3.36342	3.26767	3.39635	2.09096	2.15634	1.88506	0.000136519	1.29836	2.45949
A0A1D6K4L0	103635858	A0A1D6K4L0;A0A1D6K4K9;A0A317Y3Z4;A0A1D6K4K5;A0A317Y409;A0A1D6K4K6;A0A1D6K4K7;A0A1D6K4K8	160;501;501;501;515;515;501;515	A0A1D6K4L0	6.39e-06	75.698	1;2	S	RWTADIAKVSGRQALSQTGPETPKESFQPAF	X;X;X;X;X;X;X;X;X;X;X;X;X;X;X;Phospho (STY);X;X;X;X;X;Phospho (STY);X;X;X;X;X;X;X;X;X	XXXXXXXXXXXXPPPPPPPPPPPPPPPPPPP	QALS(0.98)QT(0.02)GPETPK	4	2	0.33727			6636;6645;6646	6636	2.25525	2.17916	2.1576	1.47805	1.55122	1.51342	4.73762e-05	0.683102	1.60559
A0A317YJ55	At1g65010_0	A0A317YJ55;A0A1D6K9I0;A0A1D6K9I1;A0A1D6GT30;A0A3L6EIP9	87;87;87;105;106	A0A317YJ55	0.0125541	30.295	1	S	PPSAAAQKPRLSFDRSPRSGDTKPVVERRVP	X;X;X;X;X;X;X;X;X;X;X;X;X;X;X;Phospho (STY);X;X;X;X;X;X;X;X;X;X;X;X;X;X;X	XXXXXXXXXXPPPPPPPPXXXXXXXXXXXXX	LS(0.001)FDRS(0.999)PR	6	3	-0.10094			5879	5879	-1.2749	-1.16982	-1.33649	-2.1059	-1.80667	-2.10486	0.00254491	0.745409	1.67645
B6TMB4	SCL30	B6TMB4;B4FND7;M1HIW8;A0A1D6KE51;A0A1D6KE47;A0A1D6KE50;C0PJE2;A0A317YB69	174;174;175;239;259;285;76;218	B6TMB4	5.58e-05	49.907	2	S	RSRSYSPAPRRGNDYSASPRRQEAHRSSPPR	X;X;X;X;X;X;X;X;X;X;X;X;X;X;X;Phospho (STY);X;Phospho (STY);X;X;X;X;X;X;X;X;X;X;X;X;X	XXXXXXXXXXPPPPPPPPPPXXXXXXXXXXX	RGNDY(0.031)S(0.997)AS(0.972)PR	6	2	-0.72681			6990;6991;6992	6990	0.543774	0.324318	0.358497	-0.221214	-0.425807	-0.338894	0.0012259	0.737501	1.66729
B6TMB4	SCL30	B6TMB4;B4FND7;M1HIW8;A0A1D6KE51;A0A1D6KE47;A0A1D6KE50;C0PJE2;A0A317YB69	176;176;177;241;261;287;78;220	B6TMB4	5.58e-05	49.907	1;2	S	RSYSPAPRRGNDYSASPRRQEAHRSSPPRRP	X;X;X;X;X;X;X;X;X;X;X;X;X;Phospho (STY);X;Phospho (STY);X;X;X;X;X;X;X;X;X;X;X;X;X;X;X	XXXXXXXXPPPPPPPPPPXXXXXXXXXXXXX	RGNDY(0.031)S(0.997)AS(0.972)PR	8	2	-0.72681			3487;6989;6990;6991;6992	6990	0.856025	0.618877	0.734765	0.17053	-0.0434944	0.064433	0.0018774	0.672733	1.59409
B6TMB4	SCL30	B6TMB4;B4FND7;M1HIW8;A0A1D6KE51;A0A1D6KE47;A0A1D6KE50;M1HAC1;A0A1D6KE49	22;22;22;143;143;143;22;22	B6TMB4	0.00175045	12.341	1	S	PYRSPPRRGYGGRGRSPPPPRRGYGGRKEGS	X;X;X;Phospho (STY);X;X;X;X;X;X;X;X;X;X;X;Phospho (STY);X;X;X;X;X;X;X;X;X;X;X;X;X;X;X	XXXXXXXXXXXXXPPPPPPPPXXXXXXXXXX	GRS(1)PPPPR	3	3	-0.34325			3587;3588	3587	0.580062	0.39884	0.585799	-0.0838654	-0.221816	-0.0313759	0.00162409	0.63392	1.55178
B6TMB4	SCL30	B6TMB4;B4FND7;M1HIW8;A0A1D6KE51;A0A1D6KE47;A0A1D6KE50;M1HAC1;A0A1D6KE49	5;5;5;126;126;126;5;5	B6TMB4	3.87e-05	53.209	1;2	S	___________MRRYSPPYRSPPRRGYGGRG	X;X;X;X;X;X;X;X;X;X;X;X;X;X;X;Phospho (STY);X;X;X;X;Phospho (STY);X;X;X;X;X;X;X;X;X;X	XXXXXXXXXXXXXPPPPPPPPPPPXXXXXXX	RYS(1)PPYRS(1)PPR	3	3	-0.9308			7380;7381;7382;7383;7384;7385;7386;7387	7383	2.1522	2.13893	2.17926	1.24314	1.18376	1.33646	3.98313e-05	0.902338	1.86909
B6TMB4	SCL30	B6TMB4;B4FND7;M1HIW8;A0A1D6KE51;A0A1D6KE47;A0A1D6KE50;M1HAC1;A0A1D6KE49	10;10;10;131;131;131;10;10	B6TMB4	3.87e-05	53.209	2	S	______MRRYSPPYRSPPRRGYGGRGRSPPP	X;X;X;X;X;X;X;X;X;X;Phospho (STY);X;X;X;X;Phospho (STY);X;X;X;X;X;X;X;X;X;X;X;Phospho (STY);X;X;X	XXXXXXXXPPPPPPPPPPPXXXXXXXXXXXX	RYS(1)PPYRS(1)PPR	8	3	-0.9308			7381;7382;7383;7384;7385;7386;7387	7383	1.99204	1.94758	1.9833	0.969509	0.898379	1.03713	1.85463e-05	1.00597	2.00829
A0A317Y5U6	Zm00014a_037411	A0A317Y5U6;C0P823;A0A1D6KGP0;P80608;B8A377	252;267;286;308;308	A0A317Y5U6	0.00024883	57.085	1	S	LFVVVFPSFGERYLSSVLFQSIKKEAESMVV	X;X;X;X;X;X;X;X;X;X;X;X;X;X;X;Phospho (STY);X;X;X;X;X;X;X;X;X;X;X;X;X;X;X	XXXXXXXXXXXXPPPPPPPPPPPXXXXXXXX	YLS(0.115)S(0.859)VLFQS(0.027)IK	4	2	2.3021			10343	10343	1.11348	0.921069	1.1523	0.443981	0.484493	0.207327	0.00366448	0.683682	1.60623
A0A1D6KKS2	ZEAMMB73_Zm00001d031696	A0A1D6KKS2;A0A317YIU0;A0A1D6KKS1	64;71;170	A0A1D6KKS2	0.0141876	22.226	1	S	DSSLEKGQPYIFRVGSGQVIKGLDEGILSMK	X;X;X;X;X;X;X;X;X;X;X;X;X;X;X;Phospho (STY);X;X;X;X;X;X;X;X;X;X;X;X;X;X;X	XXXXXXXXXXXXXPPPPPPPPXXXXXXXXXX	VGS(1)GQVIK	3	2	-0.0068807			9665	9665	1.06918	1.11835	1.24736	0.607932	0.406319	0.515185	0.00128972	0.63515	1.5531
B6SSU4	RF2b_3	B6SSU4;A0A317Y7Q1;A0A1D6KKX7	268;268;268	B6SSU4	4.86e-08	48.176	1;2	S	LSFAAGEESPKLPLPSPGGSLTRSGSGSLEG	X;X;X;X;X;X;X;X;Phospho (STY);X;X;X;X;X;X;Phospho (STY);X;X;X;X;X;X;X;X;X;X;X;X;X;X;X	PPPPPPPPPPPPPPPPPPPPPPPXXXXXXXX	LSFAAGEES(0.998)PKLPLPS(0.989)PGGS(0.006)LT(0.007)R	16	4	0.47807			5736;5872;5873;5874;5875	5875	2.47742	2.5319	2.44328	1.80254	1.75487	1.73714	2.42472e-05	0.719349	1.64644
A0A317YDI1	Zm00014a_027248	A0A317YDI1;A0A1D6L096	120;120	A0A317YDI1	0.000497249	42.41	1	S	SGGRVGGSAFSSRSSSPPSYGYSAPAPRGGY	X;X;X;X;X;X;X;X;X;X;X;X;X;X;X;Phospho (STY);X;X;X;X;X;X;X;X;X;X;X;X;X;X;X	XXXXXXXXXXXXXPPPPPPPPPPPPPPPXXX	S(0.017)S(0.004)S(0.905)PPS(0.059)Y(0.011)GY(0.003)S(0.001)APAPR	3	2	0.0023986			8480;8481	8480	-0.941725	-0.857588	-0.951493	-1.58552	-1.68844	-1.70156	9.64396e-05	0.741574	1.672
A0A317YA52	Os03g0698800_0	A0A317YA52;A0A1D6L0C8	522;522	A0A317YA52	0.00015377	52.261	1	S	LSSPRYSNADQGAMFSPSHKAAILNQFQQQQ	X;Phospho (STY);Phospho (STY);X;X;X;X;X;X;X;X;X;X;Oxidation (M);X;Phospho (STY);X;X;X;X;X;X;X;X;X;X;X;X;X;X;X	XXXXXPPPPPPPPPPPPPPPXXXXXXXXXXX	YSNADQGAMFS(0.974)PS(0.026)HK	11	3	0.043207			10384	10384	-0.471533	-0.393115	-0.576286	-1.1607	-1.12726	-1.08017	0.00037724	0.642397	1.56092
A0A1D6LBU6	103644324	A0A1D6LBU6;A0A317Y2V3;A0A1D6LBU5	202;360;360	A0A1D6LBU6	0.000216581	41.377	1	S	ENLSVSAKKPDAGGLSPAMGKEKEQGGRLLQ	X;X;X;X;X;X;X;X;X;X;X;X;X;X;X;Phospho (STY);X;X;Oxidation (M);X;X;X;X;X;X;X;X;X;X;X;X	XXXXXXXXPPPPPPPPPPPPPXXXXXXXXXX	KPDAGGLS(1)PAMGK	8	3	-0.58506			4962;4963	4963	1.1325	1.02929	1.07924	0.215631	0.204351	0.340126	9.65361e-05	0.826978	1.77397
A0A1D6LCL8	103644350	A0A1D6LCL8;A0A1D6LCP0;A0A1D6LCN7;A0A1D6LCL7;A0A1D6LCN6;A0A1D6LCK9;A0A1D6LCL9;A0A317YK27	1032;1056;1092;1204;1220;1223;1230;1087	A0A1D6LCL8	0.00146906	62.809	1	S	SGASSSKASRSFSLLSPFRSKHKVIVL____	X;X;X;X;X;X;X;X;X;X;X;X;X;X;X;Phospho (STY);X;X;X;X;X;X;X;X;X;X;X;X;X;X;X	XXXXXXXXXXPPPPPPPPPXXXXXXXXXXXX	SFSLLS(1)PFR	6	2	-1.1689			7672	7672	-1.29785	-1.05183	-1.17189	-1.78481	-2.30751	-2.23695	0.00632467	0.935904	1.91309
A0A1D6LER3	542718	A0A1D6LER3;B4FQW6;A0A1D6LER1;B4FS87;Q09054;A0A1D6LER2;A0A1D6LER4	66;24;58;66;66;66;66	A0A1D6LER3	0.00140229	29.853	1	S	TVHGQWKHSDIALKDSKTLLFGEKPVTVFGI	X;X;X;X;X;X;X;X;X;X;X;X;X;X;X;Phospho (STY);X;X;X;X;X;X;X;X;X;X;X;X;X;X;X	XXXXXXXPPPPPPPPPPXXXXXXXXXXXXXX	HS(0.236)DIALKDS(0.764)K	9	4	0.33594			3956	3956	-1.1631	-1.09483	-1.12777	-3.13918	-3.25557	-3.03811	6.78428e-06	2.01572	4.04383
A0A1D6LHU1	100384506	A0A1D6LHU1;A0A1D6LHT3;A0A1D6LHT7;A0A1D6LHT6;A0A3L6EFM6;A0A1D6LHU3	127;127;127;127;127;87	A0A1D6LHU1	3.3e-09	87.351	1	S	QGTVGLPGIDLARQRSFSTVFQEDSYQRDMD	X;X;X;X;X;X;X;X;X;X;X;X;X;X;X;Phospho (STY);X;X;X;X;X;X;X;X;X;X;X;X;X;X;X	XXXXXXXXXXXXXXXPPPPPPPPPPPPPXXX	S(0.828)FS(0.051)T(0.115)VFQEDS(0.004)Y(0.003)QR	1	2	1.3985			7680	7680	1.03696	1.13576	1.2596	0.102465	0.31402	0.240606	0.000492499	0.925075	1.89878
A0A1D6LIX2	103629333	A0A1D6LIX2;A0A3L6EEM6	69;69	A0A1D6LIX2	0.00125546	12.616	1	S	YVGGQTRLISVPRAASFGELLRKVEAVDEAS	X;X;X;X;X;X;X;X;X;X;X;X;X;X;X;Phospho (STY);X;X;X;X;X;X;X;X;X;X;X;X;X;X;X	XXXXXXXXXXXXXPPPPPPPPPXXXXXXXXX	AAS(1)FGELLR	3	2	0.93661			134	134	0.317954	0.284396	0.33725	-0.514762	-0.442414	-0.313108	0.000269168	0.736628	1.66628
A0A1D6LUI1	100281580	A0A1D6LUI1;A0A1D6LUI5;A0A1D6LUI9;B6SWQ7;A0A3L6E787;A0A1D6LUI6;A0A1D6LUI7	133;133;133;133;133;133;133	A0A1D6LUI1	8.67e-05	75.95	1	S	GTTSSRFSREYHELSSPVTKGLELELEHTNM	X;X;X;X;X;X;X;X;X;X;X;X;X;X;X;Phospho (STY);X;X;X;X;X;X;X;X;X;X;X;X;X;X;X	XXXXXXXXXPPPPPPPPPPPXXXXXXXXXXX	EYHELS(0.118)S(0.881)PVTK	7	2	0.62376			2068;2069	2069	0.54191	0.575076	0.564942	-0.230372	-0.243579	-0.215127	4.12227e-07	0.790336	1.72948
A0A3L6E8Y9	Zm00014a_028285	A0A3L6E8Y9;A0A1D6LVW2	158;158	A0A3L6E8Y9	0.00069251	32.556	1	S	YDRDISTRFVAPLPGSAKSSMDLGGRDAPPL	X;X;X;X;X;X;X;X;X;X;X;X;X;X;X;Phospho (STY);X;X;X;X;X;X;X;X;X;X;X;X;X;X;X	XXXXXXXXPPPPPPPPPPXXXXXXXXXXXXX	FVAPLPGS(1)AK	8	3	-0.37756			2360;2361	2361	0.558269	0.505085	0.782924	-0.194313	-0.151364	-0.0817258	0.00114742	0.757893	1.69102
A0A1D6LVZ8	103629948	A0A1D6LVZ8;A0A3L6ED99;A0A1D6LVZ7	324;427;427	A0A1D6LVZ8	7.41e-05	58.128	1	S	PTTGMKSLDNTTEVKSPWGRRMFNNKSLKRS	X;X;X;X;X;X;X;X;X;X;X;X;X;X;X;Phospho (STY);X;X;X;X;X;X;X;X;X;X;X;X;X;X;X	XXXXXXPPPPPPPPPPPPPPXXXXXXXXXXX	SLDNTTEVKS(1)PWGR	10	3	0.083855			7974	7974	0.445994	0.605952	0.401333	-1.2596	-1.2124	-1.10939	2.53173e-05	1.67822	3.20034
A0A1D6M0L1	ZEAMMB73_Zm00001d037808	A0A1D6M0L1;A0A1D6M0K5;A0A1D6M0K6;A0A1D6M0K3	201;322;322;322	A0A1D6M0L1	9.67e-07	66.052	1	S	FFISAEDAGAVDARKSDEYKETIIPAGKTHE	X;X;X;X;X;X;X;X;X;X;X;X;X;X;X;Phospho (STY);X;X;X;X;X;X;X;X;X;X;X;X;X;X;X	XXXXXXXXXXXXXXPPPPPPPPPPPPPPXXX	KS(0.975)DEYKET(0.025)IIPAGK	2	4	-0.8947			5092	5092	1.08959	1.12082	1.04106	-1.96891	-2.1799	-1.79468	1.12834e-05	3.06499	8.36861
A0A1D6M1Q9	103630209	A0A1D6M1Q9;A0A3L6EB17	128;128	A0A1D6M1Q9	0.000482398	40.516	1	S	DDAVLDSAREKRLRLSADPPWRPAFRMEDFE	X;X;X;X;X;X;X;X;X;X;X;X;X;X;X;Phospho (STY);X;X;X;X;X;X;X;X;X;X;X;X;X;X;X	XXXXXXXXXXXXPPPPPPPPPPXXXXXXXXX	LRLS(1)ADPPWR	4	3	-0.062139			5829	5829	-1.35568	-1.80308	-1.48309	-3.2427	-3.74021	-3.49647	0.00057578	1.94584	3.85263
A0A1D6M1V4	100285019	A0A1D6M1V4;A0A1D6M1U9;Q64HB5;A0A1D6M1V2;A0A1D6M1U1;Q64HB6;B6TZW1;Q64HB7;A0A3L6EGB9;A0A1D6M1V1;Q64HB8;A0A1D6M1U2;A0A1D6M1U0;A0A1D6M1U3	94;26;94;73;78;94;93;94;94;101;102;78;94;94	A0A1D6M1V4	5.73e-10	88.049	1	S	LAHGGRGTSSFDRSSSYSSAGQRGASKRSDY	X;X;X;X;X;X;X;X;X;X;X;X;X;X;X;Phospho (STY);X;X;X;X;X;X;X;X;X;X;X;X;X;X;X	XXXXXXXXXXXXXPPPPPPPPPPXXXXXXXX	SS(0.004)S(0.778)YS(0.109)S(0.109)AGQR	3	2	0.34907			8498	8498	-0.873249	-1.06048	-1.41601	-1.59663	-1.81589	-1.72407	0.0254666	0.595617	1.51112
A0A1D6M3X8	100272657	A0A1D6M3X8;B4FPT5	232;232	A0A1D6M3X8	0.0294978	35.317	2	S	TPRMTPPDSPPRRFASVSPPRRHSISVTSMN	X;X;X;X;X;X;X;X;X;X;X;X;X;X;X;Phospho (STY);X;Phospho (STY);X;X;X;X;X;X;X;X;X;X;X;X;X	XXXXXXXXXXXXXPPPPPPPPPXXXXXXXXX	FAS(1)VS(1)PPRR	3	3	0.017597			2103	2103	-1.5431	-1.38015	-1.52515	-2.49512	-2.33258	-2.33173	0.000270846	0.903674	1.87082
A0A1D6M3X8	100272657	A0A1D6M3X8;B4FPT5	234;234	A0A1D6M3X8	2.37e-23	104.49	1;2	S	RMTPPDSPPRRFASVSPPRRHSISVTSMNMF	X;X;X;X;X;X;X;X;X;X;X;X;X;Phospho (STY);X;Phospho (STY);X;X;X;X;X;X;X;X;X;X;X;X;X;X;X	XXXXXXXXXXXPPPPPPPPPXXXXXXXXXXX	FAS(1)VS(1)PPRR	5	3	0.017597			2097;2098;2099;2100;2101;2102;2103	2103	3.11186	3.06172	3.20826	1.39071	1.37778	1.42325	2.75331e-06	1.73004	3.31736
C0PDB0	ZEAMMB73_Zm00001d038579	C0PDB0;B6STH5;A0A1D6M7C2	56;128;128	C0PDB0	4.79e-06	47.135	1	S	DTRIRAAIPTIQYILSKGAKVILSSHLGRPK	X;X;X;X;X;X;X;X;X;X;X;X;X;X;X;Phospho (STY);X;X;X;X;X;X;X;X;X;X;X;X;X;X;X	XXXXXPPPPPPPPPPPPXXXXXXXXXXXXXX	AAIPTIQY(0.017)ILS(0.983)K	11	3	0.34866			101	101	-2.79887	-2.82802	-2.54991	-3.27275	-3.21445	-3.4549	0.0067227	0.588433	1.50361
A0A1D6MAU5	ZEAMMB73_Zm00001d038810	A0A1D6MAU5;B6STU3;A0A3L6E779;B6TYR0;B6TWU0;A0A3L6FDT3;B8A227;A0A1D6NC27	190;196;196;197;217;217;136;221	B6TWU0	0.000269403	54.05	1	S	AEAAAIAQRGFFLHPSPRGVEPPRLLPLFPV;AERAAIAERGFFLHPSPRGAEPPRLLPLFPV	X;X;X;X;X;X;X;X;X;X;X;X;X;X;X;Phospho (STY);X;X;X;X;X;X;X;X;X;X;X;X;X;X;X	XXXXXXXXXPPPPPPPPPXXXXXXXXXXXXX	GFFLHPS(1)PR	7	2	0.17237			2525;2526;2527	2527	-1.04287	-0.874548	-0.803222	-1.31208	-1.61123	-1.58559	0.00748963	0.596085	1.51161
A0A1D6MFF1	103649560	A0A1D6MFF1;A0A1D6MFF3;A0A1D6MFH5;A0A1D6MFG0;A0A1D6MFQ1;A0A1D6MFF4;Q6JN48;A0A1D6MFQ3;A0A1D6MFE3;A0A1D6MFN0;A0A1D6MFM4;A0A1D6MFH2;A0A1D6MFG6;A0A1D6MFM8;A0A1D6MFP1;A0A1D6MFH6;A0A1D6MFF2;A0A1D6MFE1;A0A1D6MFP9;A0A1D6MFP7;A0A1D6MFN8;A0A1D6MFN6;A0A1D6MFR6;A0A3L6FBY3	474;571;730;728;727;726;713;700;699;663;662;661;660;648;728;637;728;624;616;613;582;571;754;728	A0A1D6MFF1	0.00237078	38.954	1	S	STSVRTDKQAAEILKSPLVRDSMRGAAFLSS	X;X;X;X;X;X;X;X;X;X;X;X;X;X;X;Phospho (STY);X;X;X;X;X;X;X;X;X;X;X;X;X;X;X	XXXXXPPPPPPPPPPPPPPPXXXXXXXXXXX	QAAEILKS(1)PLVR	8	3	0.65279			6624;8930	6624	0.255328	0.381438	0.240914	-0.841967	-0.426602	-0.895041	0.00280234	1.01376	2.01917
B6TRL2	542068	B6TRL2;A0A1D6MVE6;Q94IQ9;A0A1D6MVE7;A0A3L6FG16;A0A317Y417;Q94IQ8	91;137;76;91;69;69;76	B6TRL2	0.000226465	48.237	1	S	PRRSARISEKVKVFDSPEGEKIPKRSRNSSG	X;X;X;X;X;X;X;X;X;X;X;X;X;X;X;Phospho (STY);X;X;X;X;X;X;X;X;X;X;X;X;X;X;X	XXXXXXXXXXXXPPPPPPPPPPPPXXXXXXX	VFDS(1)PEGEKIPK	4	4	-0.10051			9616;9617	9617	0.317901	0.345512	0.437884	-0.118539	-0.444701	-0.238093	0.00339838	0.63421	1.55209
A0A1D6N2E3	100192760	A0A1D6N2E3;A0A1D6N2E5;A0A1D6N2E4	8;8;8	A0A1D6N2E3	3.76e-10	76.685	1	S	________MDRLRAGSPVYGRQRSGSSTGSS	X;X;X;X;X;X;X;X;X;X;X;X;X;X;X;Phospho (STY);X;X;X;X;X;X;X;X;X;X;X;X;X;X;X	XXXXXXXXXXXXXPPPPPPPPXXXXXXXXXX	AGS(1)PVYGR	3	2	0.63802			365	365	0.711491	0.516744	0.759908	-0.0908799	-0.400889	-0.0913765	0.00252896	0.857096	1.81139
A0A1D6N2N7	103650830	A0A1D6N2N7;A0A1D6G576;A0A3L6DIW2;B6SWA1	117;118;118;95	A0A1D6N2N7	0.000523582	53.001	1	S	ILQGSGTKLKDIPNVSFKLSKRKADESLQSL;ILQGSGTKLKDIPNVSFKLSKRKVDENLQSL	X;X;X;X;X;X;X;X;X;X;X;X;X;X;X;Phospho (STY);X;X;X;X;X;X;X;X;X;X;X;X;X;X;X	XXXXXXXXPPPPPPPPPPXXXXXXXXXXXXX	LKDIPNVS(1)FK	8	3	-0.56249			5533	5533	1.2187	0.946716	0.841525	0.186039	0.200254	0.460354	0.00738624	0.720098	1.64729
A0A1D6N360	103650849	A0A1D6N360;A0A1D6N358	116;167	A0A1D6N360	0.00253811	27.64	1	S	LVPVEAAKKKFQRNFSDLTVWSDDNNEKKLY	X;X;X;X;X;X;X;X;X;X;X;X;X;X;X;Phospho (STY);X;X;X;X;X;X;X;X;X;X;X;X;X;X;X	XXXXXXXXXXXXXPPPPPPPPPPPPPPPXXX	NFS(0.979)DLT(0.019)VWS(0.002)DDNNEK	3	3	1.5873			6358	6358	-0.0689406	-0.0407517	-0.216326	-0.860219	-0.525376	-0.836244	0.00637843	0.63194	1.54965
C0PMP6	ZEAMMB73_Zm00001d012275	C0PMP6;B6TVP5;B6T9E2;B6SPZ8;A0A3L6DHV5;A0A1D6N6G7	186;186;186;186;186;250	C0PMP6	3.37e-66	156.91	1	S	SVLARGERLDSLVEKSSDLSAASQMFYKQAK	X;X;X;X;X;X;X;X;X;X;Phospho (STY);X;X;X;X;Phospho (STY);X;X;X;X;X;X;X;X;Oxidation (M);X;X;X;X;X;X	XXXXXXXXPPPPPPPPPPPPPPPPPPPPXXX	LDSLVEKS(0.89)S(0.107)DLS(0.002)AASQMFYK	8	3	1.3713			5319;5320	5320	2.08665	2.05823	2.16184	1.23424	1.09569	1.15438	4.95328e-05	0.940802	1.9196
E9JVD2	AR1	E9JVD2;A0A3L6FM41;A0A1D6N765;B6STZ8;A2T1W7;B6TRN5	18;51;51;123;123;123	E9JVD2	1.56e-19	91.863	1	S	HLIHWPFRVKKGTNTSPENFVTPDFPATWGA	X;X;X;X;X;X;X;X;X;X;X;X;X;X;X;Phospho (STY);X;X;X;X;X;X;X;X;X;X;X;X;X;X;X	XXXXXXXXXXPPPPPPPPPPPPPPPPPPPPP	GT(0.001)NT(0.119)S(0.768)PENFVT(0.11)PDFPAT(0.002)WGAMEK	5	2	0.039519			3691;3693;3694;3695;4810;4812	3693	3.33925	3.42692	3.38506	2.57622	2.65655	2.51765	7.3102e-05	0.800269	1.74143
A0A1D6N9Y4	100272491	A0A1D6N9Y4;B6TDW5;B4FNY3;A0A1D6N9Y5;A0A3L6FEC7	17;17;17;17;17	A0A1D6N9Y4	5.4e-05	56.922	1	S	GRRKMSAAAPPSRSWSNVGGSVIPELRAKHK	X;X;X;X;X;X;X;X;X;X;X;X;X;X;X;Phospho (STY);X;X;X;X;X;X;X;X;X;X;X;X;X;X;X	XXXXXXXXXXXXXPPPPPPPPPPPPPPXXXX	S(0.194)WS(0.806)NVGGSVIPELR	3	3	-1.6114			8746	8746	-2.50482	-2.43908	-2.48902	-3.07947	-3.11873	-3.20714	0.000103191	0.657468	1.57731
A0A1D6NG68	103651372	A0A1D6NG68;A0A3L6D8U8;A0A1D6NG52;A0A1D6NG59;A0A1D6NG46;A0A3L6FGA4;A0A1D6NG47	323;626;882;952;973;1052;1052	A0A1D6NG68	0.000929759	72.563	1	S	YYSRASSSHALSRASSSVSSLFKGSEYGTVL	X;X;X;X;X;Phospho (STY);X;X;X;X;X;X;X;X;X;Phospho (STY);X;X;X;X;X;X;X;X;X;X;X;X;X;X;X	XXXXXXXXXXXXXPPPPPPPPPPXXXXXXXX	AS(0.085)S(0.757)S(0.156)VS(0.001)SLFK	3	2	0.22375			964	964	1.25135	1.11563	0.973653	-0.248831	0.158912	-0.183955	0.00129594	1.20484	2.30511
B6U477	100272882	B6U477;A0A1D6NM32;B4F9I0;A0A3L6FEE2;A0A1D6NM34;B4FRD1	69;69;81;83;83;220	B6U477	9.22e-13	97.475	1;2	S	AKEAPVSLKLPPPPPSPVSPTDSGVAASPFK	X;X;X;X;X;X;X;X;X;X;X;X;X;X;X;Phospho (STY);X;X;Phospho (STY);X;X;X;X;X;X;X;X;X;X;X;X	XXXXXXXXXPPPPPPPPPPPPPPPPPPPPPP	LPPPPPS(0.999)PVS(0.001)PTDSGVAASPFK	7	4	-0.044635			5740;5741;5742;5743;5752;5753	5741	2.77657	2.68651	2.73056	2.01753	1.94089	2.11663	0.000246102	0.706199	1.6315
C0HIP2	101202711	C0HIP2;A0A1D6NP18;C0PJI0;A0A1D6NP17;A0A1D6NP20;A0A1D6NP30;A0A1D6NP15;A0A3L6FL49;A0A1D6NP19	98;113;235;510;612;661;667;673;691	C0HIP2	0.000187532	49.994	1	S	PISDGKVPFFADDEESPATPKADAFFVPREN	X;X;X;X;X;X;X;X;X;X;X;X;X;X;X;Phospho (STY);X;X;X;X;X;X;X;X;X;X;X;X;X;X;X	XXXXXXPPPPPPPPPPPPPPPXXXXXXXXXX	VPFFADDEES(0.976)PAT(0.024)PK	10	3	-0.23744			9833	9833	-0.0960211	-0.0821328	0.0166639	-0.985797	-1.33724	-1.04528	0.000726682	1.06894	2.09789
K7V9A1	100384406	K7V9A1;A0A1D6NS45;A0A1D6NS55;A0A1D6NS51;A0A1D6NS47;A0A1D6NS20;K7W532;A0A1D6NS54;A0A1D6NS56;A0A1D6NS25;C0PP28	1062;1072;769;834;495;499;528;557;567;810;91	K7V9A1	6.89e-10	82.33	1	S	QMRTDTALLTKEEGGSPIRNPLTAAEDARLA	X;X;X;X;X;X;X;X;X;X;X;X;X;X;X;Phospho (STY);X;X;X;X;X;X;X;X;X;X;X;X;X;X;X	XXXPPPPPPPPPPPPPPPPPPPPPPPPPPXX	TDTALLTKEEGGS(1)PIRNPLTAAEDAR	13	4	0.37742			1707;8946;8947;8948	8948	3.10771	3.00885	2.79199	2.18644	2.46831	2.23951	0.00617115	0.671425	1.59265
A0A1D6NSJ9	100501220	A0A1D6NSJ9;A0A3L6DAX4;A0A1D6NSJ4;A0A1D6NSJ7;K7V9H3;Q6QP56	19;19;19;19;19;19	A0A1D6NSJ9	4.39e-59	148.18	1	S	GGGGARGSDRAGAARSPTTTTAIQSTIQSIK	X;X;X;X;X;X;X;X;X;X;X;X;X;X;X;Phospho (STY);X;X;X;X;X;X;X;X;X;X;X;X;X;X;X	XXXXXXXXXXXXXXXPPPPPPPPPPPPPPPP	S(0.961)PT(0.011)T(0.021)T(0.005)T(0.001)AIQSTIQSIK	1	2	0.50702			8232;8233	8233	2.01591	1.95841	2.09154	1.63248	0.927436	1.44556	0.032784	0.686799	1.60971
A0A1D6NTB3	ZEAMMB73_Zm00001d045072	A0A1D6NTB3;A0A1D6NTF5;A0A1D6NTC3;A0A1D6NTB1;A0A1D6NTC7;A0A1D6NTE0;A0A1D6NTD6;A0A3L6DF50;A0A1D6NTE7;A0A1D6NTB5;A0A1D6NTA8;A0A1D6NTE6;A0A1D6NTD3;A0A1D6NTB9;A0A1D6NTB4	489;472;489;492;472;473;467;509;440;330;274;274;274;27;149	A0A1D6NTB3	1.35e-13	95.568	1	S	NLNHTPLSDAAAQNLSPRAPIDKLDSASELI	X;X;X;X;X;X;X;X;X;X;X;X;X;X;X;Phospho (STY);X;X;X;X;X;X;X;X;X;X;X;X;X;X;X	PPPPPPPPPPPPPPPPPPXXXXXXXXXXXXX	NENPGLENLNHTPLS(0.023)DAAAQNLS(0.977)PR	23	3	-0.02939			6337;6338	6338	0.76464	0.903269	0.990452	-0.158016	-0.078679	0.00603043	0.000287096	0.963008	1.94937
A0A1D6NXR1	103638194	A0A1D6NXR1;A0A1D6NXP6;A0A1D6NXP3;A0A1D6NXQ2;A0A1D6NXR2;K7VTA8;A0A3L6DCB4	32;55;55;55;32;55;368	A0A1D6NXR1	4.05e-08	80.43	1	S	NARAGFGGDTSLFSTSLPVLPHEKLIFADSS	X;X;X;X;X;X;X;X;X;X;X;X;X;X;X;Phospho (STY);X;X;X;X;X;X;X;X;X;X;X;X;X;X;X	XXXPPPPPPPPPPPPPPPPPPPPPXXXXXXX	AGFGGDTSLFS(0.117)T(0.117)S(0.765)LPVLPHEK	13	4	-1.3206			327	327	-1.38445	-1.36186	-1.3127	-2.14557	-2.19446	-2.01058	0.000204306	0.763864	1.69803
A0A3L6DF03	SRF8_2	A0A3L6DF03;A0A1D6P4B7	654;698	A0A3L6DF03	4.36e-07	92.215	1	S	QLVRLMQRASIVRRQSDDQLGYSYRVPERDG	X;X;X;X;X;X;X;X;X;X;X;X;X;X;X;Phospho (STY);X;X;X;X;X;X;X;X;X;X;X;X;X;X;X	XXXXXXXXXXXXXPPPPPPPPPPPPXXXXXX	RQS(1)DDQLGYSYR	3	3	-0.50076			7210	7210	-1.42018	-1.2994	-1.40519	-2.40222	-2.04018	-2.18173	0.00174335	0.833122	1.78154
A0A1D6P910	ZEAMMB73_Zm00001d047373	A0A1D6P910;A0A1D6P911;A0A1D6P909;K7VHW8;C0PFA7;B6T584;A0A3L6DHA3;A0A221I3S0	209;209;209;374;374;374;374;374	A0A1D6P910	4.06e-78	156.13	1	S	LGSPELSSLLGGLAGSPRTGSAGGLGGSGSP	X;X;X;X;X;X;X;X;X;X;X;X;X;X;X;Phospho (STY);X;X;X;X;X;X;X;X;X;X;X;X;X;X;X	PPPPPPPPPPPPPPPPPPXXXXXXXXXXXXX	TGGVGGTGATGGLGGLGSPELSSLLGGLAGS(1)PR	31	3	0.19024			9052;9053	9052	-0.128609	-0.707708	-0.221657	-1.17728	-1.29211	-1.25317	0.0082678	0.888194	1.85086
A0A1D6PB15	ZEAMMB73_Zm00001d047535	A0A1D6PB15;C0P445;B4FU75;A0A3L6DCJ6;A0A317YJP0	20;20;20;20;20	A0A1D6PB15	0.0009514	41.665	1	S	APVIARPSLPKKPSPSFRLRNGSLNVLRLRR	X;X;X;X;X;X;X;X;X;X;X;X;X;X;X;Phospho (STY);X;X;X;X;X;X;X;X;X;X;X;X;X;X;X	XXXXXXXXXXXPPPPPPPXXXXXXXXXXXXX	KPS(0.002)PS(0.998)FR	5	3	-0.30531			5024	5024	1.26631	1.2141	1.46491	0.542797	0.610806	0.613302	0.000809585	0.726135	1.6542
C4IZ18	100217240	C4IZ18;A0A1D6PET0;B4FEW8;A0A1D6PES8;B6T4S5;B4FCN5;A0A3L6DE40	58;93;170;242;242;242;242	C4IZ18	6.59e-05	22.177	1	S	STKPPVAASALKPGGSPKKGEVKPAADPVQT	X;X;X;X;X;X;X;X;X;X;X;X;X;X;X;Phospho (STY);X;X;X;X;X;X;X;X;X;X;X;X;X;X;X	PPPPPPPPPPPPPPPPPPXXXXXXXXXXXXX	SGSVASTKPPVAAS(0.004)ALKPGGS(0.996)PK	21	4	-0.40551			7782	7782	-0.607265	-0.748397	-0.854935	-1.40893	-1.09412	-1.63129	0.0201555	0.641247	1.55968
A0A1D6PIX2	ZEAMMB73_Zm00001d048272	A0A1D6PIX2;A0A1D6PIZ4;A0A1D6PIX1;A0A1D6PIZ0;A0A3L6DCX7;A0A1D6PIX5;A0A1D6PIX4;A0A1D6PIX3;A0A1D6PIY4;B4FPH3;C0P4D7;A0A1D6PIX7	159;159;159;159;159;159;159;159;159;159;159;159	A0A1D6PIX2	7.84e-06	74.12	2	S	SIPTYMDERSQATILSPTAGSMSPNAAPWVK	X;X;X;X;X;X;X;X;X;X;X;X;X;X;X;Phospho (STY);X;X;X;X;X;Oxidation (M);Phospho (STY);X;X;X;X;X;X;X;X	XXXXXXXXXPPPPPPPPPPPPPPPPPPPPPP	SQAT(0.004)ILS(0.772)PT(0.223)AGS(0.049)MS(0.951)PNAAPWVK	7	3	-1.4759			8242	8242	1.47042	1.4124	1.52909	0.63717	0.705334	0.681386	3.45718e-05	0.796008	1.73629
A0A1D6PIX2	ZEAMMB73_Zm00001d048272	A0A1D6PIX2;A0A1D6PIZ4;A0A1D6PIX1;A0A1D6PIZ0;A0A3L6DCX7;A0A1D6PIX5;A0A1D6PIX4;A0A1D6PIX3;A0A1D6PIY4;B4FPH3;C0P4D7;A0A1D6PIX7	166;166;166;166;166;166;166;166;166;166;166;166	A0A1D6PIX2	7.84e-06	74.12	2	S	ERSQATILSPTAGSMSPNAAPWVKTLRNGGH	X;X;X;X;X;X;X;X;Phospho (STY);X;X;X;X;X;Oxidation (M);Phospho (STY);X;X;X;X;X;X;X;X;X;X;X;X;X;X;X	XXPPPPPPPPPPPPPPPPPPPPPPXXXXXXX	SQAT(0.004)ILS(0.772)PT(0.223)AGS(0.049)MS(0.951)PNAAPWVK	14	3	-1.4759			8242	8242	1.47042	1.4124	1.52909	0.63717	0.705334	0.681386	3.45718e-05	0.796008	1.73629
A0A1D6PJD2	103639543	A0A1D6PJD2;A0A1D6PJE0;A0A1D6PJG1;A0A1D6PJF1;A0A1D6PJG0;A0A1D6PJE9;K7VLM3;A0A3L6DC31	259;398;403;554;1013;1025;1030;1030	A0A1D6PJD2	8.89e-14	48.057	1	S	GFDTGNSSRNFGRFDSFDDTDPFGSSGPFKA	X;X;X;X;X;X;X;X;X;X;X;X;X;X;X;Phospho (STY);X;X;X;X;X;X;X;X;X;X;X;X;X;X;X	XXXXXXXXXPPPPPPPPPPPPPPPPPPPPPX	NFGRFDS(0.955)FDDT(0.045)DPFGS(0.001)SGPFK	7	3	0.19853			6348	6348	1.02164	1.00828	1.16493	-1.18226	-1.02049	-0.848553	4.36408e-05	2.08205	4.23409
A0A1D6PJD2	103639543	A0A1D6PJD2;A0A1D6PJE0;A0A1D6PJG1;A0A1D6PJF1;A0A1D6PJG0;A0A1D6PJE9;K7VLM3;A0A3L6DC31	193;332;337;488;947;959;964;964	A0A1D6PJD2	5.18e-05	71.816	1	S	FDDSVPSTPAYTSGFSPKFGESRDDSSSYSF	X;X;X;X;X;X;X;X;X;X;X;X;X;X;X;Phospho (STY);X;X;X;X;X;X;X;X;X;X;X;X;X;X;X	PPPPPPPPPPPPPPPPPPXXXXXXXXXXXXX	SSFFDDSVPS(0.005)T(0.005)PAY(0.003)T(0.024)S(0.064)GFS(0.899)PK	19	4	0.18825			8346	8346	0.30506	0.469042	0.438786	-0.552451	-0.31668	-0.444734	0.000575609	0.842251	1.79285
B4FQK4	100272774	B4FQK4;A0A1D6PVM9;B4FSB7;A0A3L6F0T0;A0A1D6PVM6	365;450;493;493;528	B4FQK4	1e-26	125.56	1	S	ETQDYVPSHVPQRSPSLEDDPYFSYPNLFSA	X;X;X;X;X;X;X;X;X;X;X;X;X;X;X;Phospho (STY);X;X;X;X;X;X;X;X;X;X;X;X;X;X;X	XXXXXXXXXXXXXPPPPPPPPPPPPPPPPPP	S(0.089)PS(0.911)LEDDPYFSYPNLFSAPKP	3	3	0.073834			8201;8202;8203	8201	1.75811	1.73898	1.89163	0.636085	0.648373	0.72956	3.69271e-05	1.1249	2.18087
A0A1D6PW61	100191474	A0A1D6PW61;A0A1D6PW59;A0A1D6PW57;A0A1D6PW64;A0A1D6PW46;A0A1D6PW62;C6KE75;A0A1D6PW56;A0A1D6PW39;A0A3L6F6W1	57;57;57;57;57;57;57;57;57;139	A0A1D6PW61	4.87e-05	69.042	1	S	SSGGNGAPVRIPKPVSPNPQKNGATGASRPL	X;X;X;X;X;X;X;X;X;X;X;X;X;X;X;Phospho (STY);X;X;X;X;X;X;X;X;X;X;X;X;X;X;X	XXXXXXXXXXPPPPPPPPPPPXXXXXXXXXX	IPKPVS(1)PNPQK	6	3	0.52881			4322;4323	4323	0.787737	0.564773	0.735601	0.0231753	-0.32354	-0.0820328	0.00256948	0.823503	1.7697
A0A1D6Q0J9	100191260	A0A1D6Q0J9;B6T9D2;B4F864	85;105;105	A0A1D6Q0J9	7e-55	144.2	1	S	EVYAAYEQHKLETLDSPKAGKFTRIEMTEEE	X;X;X;X;X;X;X;X;X;X;X;X;X;X;X;Phospho (STY);X;X;X;X;X;X;X;X;X;X;X;X;X;X;X	PPPPPPPPPPPPPPPPPPXXXXXXXXXXXXX	LETLDS(1)PK	6	2	1.0355			2072;2073;5355;5356	5356	2.49965	2.36018	2.37861	1.63017	1.31697	1.57508	0.00103064	0.905408	1.87307
A0A1D6QBP8	103654150	A0A1D6QBP8;A0A1D6QBQ1;A0A1D6QBQ6;K7UK47;A0A3L6F1S1	186;186;126;186;186	A0A1D6QBP8	0.000324977	32.861	1	S	PGGYGGGYDNDRYEGSYGSRYDNRNGNGRGD	X;X;X;X;X;X;X;X;X;X;X;X;X;X;X;Phospho (STY);X;X;X;X;X;X;X;X;X;X;X;X;X;X;X	PPPPPPPPPPPPPPPPPPPPXXXXXXXXXXX	YEGS(0.998)YGS(0.002)R	4	2	-0.55056			8165;10285	10285	-0.363417	-0.339212	-0.713643	-1.05549	-1.23447	-0.989115	0.0117809	0.620933	1.53787
A0A1D6QEE7	100383282	A0A1D6QEE7;K7V174;A0A1D6QEE8;K7U2A9;C0PEQ7;A0A3L6EWX7	91;178;229;288;288;288	A0A1D6QEE7	0.000899032	57.28	1	S	LASEPYQMSSQKALGSVSGAKTEDAGSGKMD	X;X;X;X;X;X;X;X;X;X;X;X;X;X;X;Phospho (STY);X;X;X;X;X;X;X;X;X;X;X;X;X;X;X	XXXXXXXXXXXXPPPPPPPPPXXXXXXXXXX	ALGS(0.999)VS(0.001)GAK	4	2	-0.70364			559	559	0.206866	0.0766814	0.0249243	-0.588141	-0.661704	-0.590533	0.000268724	0.716283	1.64294
A0A1D6QKL9	ZEAMMB73_Zm00001d052873	A0A1D6QKL9;A0A3L6F5L0	202;202	A0A1D6QKL9	2.14e-11	76.16	1	S	AAARVAAAAAPTPGESPRAPEPPPAPAPAAS	X;X;X;X;X;X;X;X;X;X;X;X;X;X;X;Phospho (STY);X;X;X;X;X;X;X;X;X;X;X;X;X;X;X	XXXXPPPPPPPPPPPPPPPPPPPPPPPPPPP	VAAAAAPT(0.152)PGES(0.848)PRAPEPPPAPAPAASK	12	4	0.2144			9424;9425	9424	0.494843	0.6021	0.468195	-0.505522	-0.358549	-0.336236	0.000162098	0.921815	1.8945
A0A1D6QQ56	100279814	A0A1D6QQ56;A0A1D6QQ59;A0A3L6F6B1;B8A043;C0P3Q1;A0A1D6QQ74;A0A1D6QQ75;B4F9M6;A0A3L6F001	71;16;16;16;16;16;71;16;16	A0A1D6QQ56	0.000155575	39.989	1	S	MADDHYSSKRKYDDPSPPPRRTGFSSGPPPA	X;X;X;X;X;X;X;X;X;X;X;X;X;X;X;Phospho (STY);X;X;X;X;X;X;X;X;X;X;X;X;X;X;X	XXXXXXXXXXPPPPPPPPPPPXXXXXXXXXX	KY(0.001)DDPS(0.999)PPPRR	6	3	0.45808			5209;5210;5211;5212;5213;10256;10257;10258	5213	3.1737	3.1167	3.16876	2.21572	1.94907	2.22485	0.000376083	1.02318	2.03239
A0A1D6QQ56	100279814	A0A1D6QQ56;A0A1D6QQ59;A0A3L6F6B1;B8A043;C0P3Q1;A0A1D6QQ74;A0A1D6QQ75	87;32;32;32;32;32;87	A0A1D6QQ56	4.17e-26	102.25	1	S	PPPRRTGFSSGPPPASPLAGGAPSYNSVPPP	X;X;X;X;X;X;X;X;X;X;X;X;X;X;X;Phospho (STY);X;X;X;X;X;X;X;X;X;X;X;X;X;X;X	XXXXPPPPPPPPPPPPPPPPPPPPPPPPPPP	TGFSSGPPPAS(0.999)PLAGGAPSYNSVPPPPDEIQLAK	11	4	-0.15928			7310;9040;9041;9042;9043;9044	9041	2.72572	2.66114	2.77409	2.23175	2.0439	1.99542	0.00134972	0.629962	1.54752
A0A3L6F4W6	RBG3_2	A0A3L6F4W6;A0A1D6QQX7;A0A1D6QQX8;A0A1D6QQY1;A0A1D6QQX6	179;179;179;179;179	A0A3L6F4W6	0.0006473	42.268	1	S	HPREHDRAAETHNMDSDNDKYKEHGSRKRFS	X;X;X;X;X;X;X;X;X;X;X;X;X;Oxidation (M);X;Phospho (STY);X;X;X;X;X;X;X;X;X;X;X;X;X;X;X	XXXXXXXPPPPPPPPPPPPPPPXXXXXXXXX	AAET(0.027)HNMDS(0.971)DNDKY(0.002)K	9	4	-0.94143			69	69	-0.876469	-1.05239	-0.946842	-1.4509	-1.90356	-1.50243	0.0121893	0.660396	1.58052
A0A1D6QRP8	100276260	A0A1D6QRP8;C4J9I2;A0A3L6F785;A0A1D6QRP9	318;485;485;1106	A0A1D6QRP8	0.00030838	48.97	1	S	GLAAQPPAYGSGRAGSNAGSYEAPQGRK___	X;X;X;X;X;X;X;X;X;X;X;X;X;X;X;Phospho (STY);X;X;X;X;X;X;X;X;X;X;X;X;X;X;X	XXXXXXXXXXXXXPPPPPPPPPPPPPPXXXX	AGS(0.998)NAGS(0.002)YEAPQGR	3	2	0.87294			362	362	-2.0251	-2.31082	-2.2893	-3.67372	-3.03502	-3.16644	0.00732588	1.08332	2.11891
A0A1D6QUN8	100193979	A0A1D6QUN8;C0PG83;C0PDI7	18;18;18	A0A1D6QUN8	3.2e-11	91.784	1	S	YERIEKPFPVQGGGFSPKRLRAMLLGVDKRR	X;X;X;X;X;X;X;X;X;X;X;X;X;X;X;Phospho (STY);X;X;X;X;X;X;X;X;X;X;X;X;X;X;X	XXXPPPPPPPPPPPPPPPXXXXXXXXXXXXX	IEKPFPVQGGGFS(1)PK	13	3	-0.43697			4138	4138	1.00979	1.17173	0.980221	-0.10849	-0.12496	-0.0118202	8.06927e-05	1.13567	2.1972
A0A1D6QVH1	100283738	A0A1D6QVH1;B6TL91;A0A3L6EXR3;A0A1D6QVG9;A0A1D6QVH4;A0A1D6QVH3	293;293;294;239;237;341	A0A1D6QVH1	0.0364412	20.903	1	S	AKRKEQSSSRSSGGASPRGFPGGFPGGVPGN	X;X;X;X;X;X;X;X;X;X;X;X;X;X;X;Phospho (STY);X;X;X;X;X;X;X;X;X;X;X;X;X;X;X	XXXXXXXXXXPPPPPPPPXXXXXXXXXXXXX	S(0.002)S(0.007)GGAS(0.992)PR	6	2	-0.2528			8364	8364	-1.65123	-2.03315	-1.95202	-3.67924	-3.32601	-3.1453	0.00152237	1.50472	2.83769
B6SL93	100279412	B6SL93;A0A3L6D9V1;A0A1X8S6E7;A0A1Q1CZF9	99;100;134;134	B6SL93	0.000541479	51.264	1	S	AALKTDSVLKALNLGSPKSGDAPRGFREKPR	X;X;X;X;X;X;X;X;X;X;X;X;X;X;X;Phospho (STY);X;X;X;X;X;X;X;X;X;X;X;X;X;X;X	XXXXXXXXXXPPPPPPPPXXXXXXXXXXXXX	ALNLGS(1)PK	6	2	-0.82705			572;573	573	2.08797	2.10066	2.1453	0.671383	0.730961	0.82251	8.43993e-06	1.36969	2.58415
Q9FYS5	HMGIY2	Q9FYS5;A0A317Y6Y6;A0A1R3M7Z7;Q9FER8	124;124;124;124	Q9FYS5	8.32e-23	83.768	1	S	PSSTGRGRGRPPKAKSPLEAAVKQATAGMPK	X;X;X;X;X;X;X;X;X;X;X;X;X;X;X;Phospho (STY);X;X;X;X;X;X;X;X;X;X;X;X;X;X;X	XXXXXXXXXXXXXPPPPPPPPPPXXXXXXXX	AKS(1)PLEAAVK	3	2	0.62332			500;501;502;503;504;505	505	3.92915	3.84141	3.9677	2.92768	2.77623	2.88451	5.67549e-05	1.04995	2.07045
Q9FYS5	HMGIY2	Q9FYS5;A0A317Y6Y6;A0A1R3M7Z7	155;155;155	Q9FYS5	1.05e-13	96.785	1	S	PRGRPPKKAKTDGAASPSPSPAPAPAGDGST	X;X;X;X;X;X;X;X;X;X;X;X;X;X;X;Phospho (STY);X;X;X;X;X;X;X;X;X;X;X;X;X;X;X	XXXXXXXXPPPPPPPPPPPPPPPPPPPPPPP	AKT(0.011)DGAAS(0.964)PS(0.02)PS(0.004)PAPAPAGDGSTPGKR	8	4	0.10074			507;508;509;8925;8926;8928	509	1.54963	1.48371	1.51027	-0.444701	-0.304753	-0.538662	1.03501e-05	1.94391	3.84746
Q9FYS5	HMGIY2	Q9FYS5;A0A317Y6Y6;A0A1R3M7Z7	157;157;157	Q9FYS5	0.00107139	30.828	1	S	GRPPKKAKTDGAASPSPSPAPAPAGDGSTPG	X;X;X;X;X;X;X;X;X;X;X;X;X;X;X;Phospho (STY);X;X;X;X;X;X;X;X;X;X;X;X;X;X;X	XXXXXXXXPPPPPPPPPPPPPPPPPPPPPPP	T(0.044)DGAAS(0.15)PS(0.759)PS(0.039)PAPAPAGDGS(0.004)T(0.004)PGK	8	4	-0.37016			8927	8927	-0.858157	-1.10135	-1.1912	-2.44407	-2.30669	-2.38528	0.000243264	1.32844	2.51131
Q9FYS5	HMGIY2	Q9FYS5;A0A317Y6Y6;A0A1R3M7Z7;Q9FER8	108;108;108;108	Q9FYS5	1.48e-35	127.38	1	S	PPKARDPNAPAPAPKSPSSTGRGRGRPPKAK	X;X;X;X;X;X;X;X;X;X;X;X;X;X;X;Phospho (STY);X;X;X;X;X;X;X;X;X;X;X;X;X;X;X	XXXPPPPPPPPPPPPPPPPPPPXXXXXXXXX	ARDPNAPAPAPKS(0.878)PS(0.045)S(0.056)T(0.021)GR	13	3	-0.13546			830;831;1521	831	1.67351	1.76589	1.83997	0.72687	0.997084	0.642908	0.00115931	0.970836	1.95998
A0A3L6FXQ5	PIP2-5	A0A3L6FXQ5;Q9XF58;A0A1R3N4Y1	281;282;282	A0A3L6FXQ5	0.000187414	71.244	1	S	QYVLRASAAKLGSSASFSR____________	X;X;X;X;X;X;X;X;X;X;X;X;X;X;X;Phospho (STY);X;X;X;X;X;X;X;X;X;X;X;X;X;X;X	XXXXXXXXXXPPPPPPPPPXXXXXXXXXXXX	LGSS(0.001)AS(0.989)FS(0.011)R	6	2	-0.42564			5475;5476	5476	1.19012	1.16172	1.00032	0.258265	0.866387	0.265936	0.0357124	0.653858	1.57337
Q6IV73	PP2C	Q6IV73;B4FW31;A0A1X7YHN5;A0A3L6F0H9	278;278;280;405	Q6IV73	1.05e-05	76.41	1	S	TVIIVRFIDGTTGEKSGDDKETTNDQHS___	X;X;X;X;X;X;X;X;X;X;X;X;X;X;X;Phospho (STY);X;X;X;X;X;X;X;X;X;X;X;X;X;X;X	XXXXXXPPPPPPPPPPPPPPPPPPPPPPXXX	FIDGT(0.005)T(0.005)GEKS(0.855)GDDKET(0.107)T(0.029)NDQHS(0.001)	10	4	0.51908			2211;2212	2211	1.41186	1.18575	1.05797	0.524315	0.792284	0.536606	0.0113602	0.600792	1.51655
A0A317Y5G6	Zm00014a_001526	A0A317Y5G6	147	A0A317Y5G6	0.000271515	58.149	1	S	KQRFRNKLKEADRKFSGNAQENKMESLRELL	X;X;X;X;X;X;X;X;X;X;X;X;X;X;X;Phospho (STY);X;X;X;X;X;X;X;X;X;X;X;X;X;X;X	XXXXXXXXXXXXXPPPPPPPPPPXXXXXXXX	KFS(1)GNAQENK	3	3	0.060062			4735	4735	1.35056	1.25331	1.18054	0.316711	0.420599	0.395918	0.000110985	0.883728	1.84514
A0A317Y805	CPRF2_0	A0A317Y805	397	A0A317Y805	7.75e-05	68.81	1	S	VAGKMGSTDSLQRVVSLEHLQKRMCGGPASS	X;X;X;X;X;X;X;X;X;X;X;X;X;X;X;Phospho (STY);X;X;X;X;X;X;X;X;X;X;X;X;X;X;X	XXXXXXXXXXXXXPPPPPPPPPXXXXXXXXX	VVS(1)LEHLQK	3	2	0.25687			10104;10105	10105	1.57063	1.53412	1.64818	-0.157123	0.583817	-0.251497	0.00459002	1.52591	2.87969
C0PH10	100383562	C0PH10;A0A317Y829	254;254	C0PH10	0.00313895	30.786	1	S	SSDSDDEPQRRKQDVSENDEPRRRLHDDNEP	X;X;X;X;X;X;X;X;X;X;X;X;X;X;X;Phospho (STY);X;X;X;X;X;X;X;X;X;X;X;X;X;X;X	XXXXXXXXXXXPPPPPPPPPPPXXXXXXXXX	KQDVS(1)ENDEPR	5	3	0.15957			5052;5053	5053	-0.768742	-1.30182	-0.781597	-1.41456	-1.71969	-1.50017	0.0397502	0.594088	1.50952
A0A317Y969	NUP1_0	A0A317Y969;A0A1D6L6Z3;A0A1D6L6Z4	456;249;456	A0A317Y969	5.76e-24	121.08	1	S	KMAEKIFEQLNIIAPSPKQQQSVTLNASNSM	X;X;X;X;X;X;X;X;X;X;X;X;X;X;X;Phospho (STY);X;X;X;X;X;X;X;X;X;X;X;X;X;Phospho (STY);Oxidation (M)	XXXXXPPPPPPPPPPPPPXXXXXXXXXXXXX	IFEQLNIIAPS(1)PK	11	2	-2.0421			4148;4149;4150	4150	2.00671	2.0099	2.00915	0.0763267	0.0486017	0.103565	2.74597e-08	1.93242	3.81695
A0A317Y9N4	PLT5_2	A0A317Y9N4	506	A0A317Y9N4	4.41e-06	50.734	2	S	EQMGGLFGIPNMAGDSDQQSPEKEKTLSNVE	X;X;Oxidation (M);X;X;X;X;X;X;X;X;Oxidation (M);X;X;X;Phospho (STY);X;X;X;Phospho (STY);X;X;X;X;X;X;X;X;X;X;X	PPPPPPPPPPPPPPPPPPPPPPPPPXXXXXX	TLEQMGGLFGIPNMAGDS(1)DQQS(1)PEKEK	18	4	-0.12251			9146	9146	0.173326	0.104046	0.391487	-0.467284	-0.455184	-0.285829	0.00391923	0.625718	1.54298
A0A317Y9N4	PLT5_2	A0A317Y9N4	510	A0A317Y9N4	4.41e-06	50.734	2	S	GLFGIPNMAGDSDQQSPEKEKTLSNVEISST	X;X;X;X;X;X;X;Oxidation (M);X;X;X;Phospho (STY);X;X;X;Phospho (STY);X;X;X;X;X;X;X;X;X;X;X;X;X;X;X	PPPPPPPPPPPPPPPPPPPPPXXXXXXXXXX	TLEQMGGLFGIPNMAGDS(1)DQQS(1)PEKEK	22	4	-0.12251			9146	9146	0.173326	0.104046	0.391487	-0.467284	-0.455184	-0.285829	0.00391923	0.625718	1.54298
A0A317YC09	TIC110_0	A0A317YC09	666	A0A317YC09	6.6e-32	118.43	1	S	LSPVAETEASSAAAESEGEDGEHEWESLDTL	X;X;X;X;X;X;X;X;X;X;X;X;X;X;X;Phospho (STY);X;X;X;X;X;X;X;X;X;X;X;X;X;X;X	PPPPPPPPPPPPPPPPPPPPPPPPPPPPPPP	GELSPVAETEAS(0.001)S(0.007)AAAES(0.992)EGEDGEHEWESLDTLR	18	3	-3.0417			2507	2507	-0.254993	0.117146	-0.11038	-0.881228	-0.996475	-0.682197	0.00558973	0.770558	1.70593
B4FS10	100281325	B4FS10;A0A317YCE2	99;145	B4FS10	4.09e-36	127.28	1	S	KTTAGKKAAGGDDSGSGGGFNLGGLGGLFAK	X;Phospho (STY);X;X;X;X;X;X;X;X;X;X;X;X;X;Phospho (STY);X;X;X;X;X;X;X;X;X;X;X;X;X;X;X	XXXXXXPPPPPPPPPPPPPPPPPPPPPPPPP	AAGGDDS(0.059)GS(0.941)GGGFNLGGLGGLFAK	9	3	0.46156			77;78;4469	77	1.17657	0.909713	1.101	0.241633	0.0850073	0.122141	0.000589243	0.912833	1.88274
A0A317YG15	Zm00014a_027529	A0A317YG15	352	A0A317YG15	6.21e-05	65.309	1	S	VDSPTEKTKDHAGVDSPAEKPKHDMRVLDIS	X;X;X;X;X;X;X;X;X;X;X;X;X;X;X;Phospho (STY);X;X;X;X;X;X;X;X;X;X;X;X;X;X;X	XXXXXXXPPPPPPPPPPPPPPPXXXXXXXXX	TKDHAGVDS(1)PAEKPK	9	5	0.40656			9120	9120	-0.636271	-0.646574	-0.873587	-2.58365	-3.21009	-3.16885	0.000469649	2.26872	4.81895
B4FK20	100216858	B4FK20;A0A317YH44	161;161	B4FK20	0.00572115	19.986	1	S	HPEEINKLSKVKAHLSDVKGIMMDNIEKILD	X;X;X;X;X;X;X;X;X;X;X;X;X;X;X;Phospho (STY);X;X;X;X;X;X;X;X;X;X;X;X;X;X;X	XXXXXXXXXXXXPPPPPPPXXXXXXXXXXXX	AHLS(1)DVK	4	3	-1.0397			410	410	-2.66732	-2.35222	-2.40126	-3.25245	-3.21906	-3.20228	0.00161936	0.750993	1.68295
A0A317YIJ2	At1g56220_3	A0A317YIJ2;B4FA62	50;50	A0A317YIJ2	4.68e-27	115.06	1	S	KISDPAGDAAAFVPPSPASGSEETPVKVTRS	X;X;X;X;X;X;X;X;X;X;X;X;X;X;X;Phospho (STY);X;X;X;X;X;X;X;X;X;X;X;X;X;X;X	XPPPPPPPPPPPPPPPPPPPPPPPPPPXXXX	ISDPAGDAAAFVPPS(0.993)PAS(0.007)GSEETPVK	15	3	-0.13803			4369;4370	4370	1.59398	1.4209	1.60131	0.80786	0.800059	0.777672	0.000238142	0.743532	1.67427
A0A317YIJ2	At1g56220_3	A0A317YIJ2;B4FA62;A0A3L6D7A2;B4FU83;A0A3L6DE38	77;77;11;77;77	A0A317YIJ2	0.000237747	51.422	1	S	VTRSIMIKRPAGYPSSPRSAASTPPASPLGT	X;X;X;X;X;X;X;X;X;X;X;X;X;X;X;Phospho (STY);X;X;X;X;X;X;X;X;X;X;X;X;X;X;X	XXXXXXXXPPPPPPPPPPXXXXXXXXXXXXX	RPAGYPS(0.026)S(0.974)PR	8	3	0.061938			7134;7135	7134	-0.659474	-0.888825	-0.967924	-1.4527	-1.49585	-1.49015	0.0023706	0.640827	1.55922
A0A3L6D784	Zm00014a_038312	A0A3L6D784;A0A3L6EAU3	62;62	A0A3L6D784	7.49e-11	92.524	1	S	RLCRAVLANYDDELSSPKFAPPEHGYFDIDP	X;X;X;X;X;X;X;X;X;X;X;X;X;X;X;Phospho (STY);X;X;X;X;X;X;X;X;X;X;X;X;X;X;X	XXXXPPPPPPPPPPPPPPXXXXXXXXXXXXX	AVLANYDDELS(0.24)S(0.76)PK	12	3	1.2415			1198;1199	1198	1.07573	1.15394	1.04626	0.0983862	0.292986	0.0680116	0.000265768	0.938848	1.917
B4FU83	100273280	B4FU83;A0A3L6DE38	50;50	B4FU83	1.74e-19	95.85	1	S	KISDPAGDAAALVPPSPASGSEETPVKVTRS	X;X;X;X;X;X;X;X;X;X;X;X;X;X;X;Phospho (STY);X;X;X;X;X;X;X;X;X;X;X;X;X;X;X	XPPPPPPPPPPPPPPPPPPPPPPPPPPXXXX	ISDPAGDAAALVPPS(0.973)PAS(0.021)GS(0.004)EET(0.001)PVK	15	4	-1.5267			4371;4372;4373	4372	1.65364	1.59284	1.72079	0.972469	1.02633	0.963179	8.99913e-05	0.66843	1.58934
C0P3K2	ATPG_1	C0P3K2;A0A3L6DEC6;K7VN08;B6T908;B6T0F6	132;202;203;203;203	C0P3K2	2.18e-47	142.69	1	S	AQKEEAVKALDAQIASLSDEIVKKVLPSA__	X;X;X;X;X;X;X;X;X;X;X;X;X;X;X;Phospho (STY);X;X;X;X;X;X;X;X;X;X;X;X;X;X;X	XXXXXXXXPPPPPPPPPPPPPPPPXXXXXXX	ALDAQIAS(0.98)LS(0.02)DEIVKK	8	3	-0.76189			534	534	0.786278	0.698141	0.854418	0.117402	0.293334	-0.14297	0.00683719	0.690357	1.61368
B4FG90	100193773	B4FG90;A0A3L6DFM1	485;485	B4FG90	0.00268426	47.361	1	S	FLFDAKNLQGHLGHGSE______________	X;X;X;X;X;X;X;X;X;X;X;X;X;X;X;Phospho (STY);X;X;X;X;X;X;X;X;X;X;X;X;X;X;X	XXXXXXPPPPPPPPPPPXXXXXXXXXXXXXX	NLQGHLGHGS(1)E	10	2	-1.3122			6426	6426	-1.52012	-1.53216	-1.89488	-2.74562	-3.13067	-2.28209	0.017529	1.07041	2.10003
B6TP00	ERD15_2	B6TP00;A0A3L6DG53;B4FDZ1	99;99;100	B6TP00	0.0167117	21.201	1	S	AALKTDSVLKALNMTSPKGGGDAPRGFREKP	X;X;X;X;X;X;X;X;X;X;X;X;X;X;X;Phospho (STY);X;X;X;X;X;X;X;X;X;X;X;X;X;X;X	XXXXXXXXXXPPPPPPPPXXXXXXXXXXXXX	ALNMT(0.093)S(0.907)PK	6	2	1.1356			574	574	-0.293414	-0.450312	-0.552555	-1.42619	-1.83546	-1.78307	0.0011075	1.24948	2.37756
C0P7N5	100276316	C0P7N5;A0A3L6DHK6	103;103	C0P7N5	2.4e-09	88.694	1	S	SPVVQTPKSTTFVEASPVVQTQKTATDAEVP	X;X;X;X;X;X;X;X;X;X;X;X;X;X;X;Phospho (STY);X;X;X;X;X;X;X;X;X;X;X;X;X;X;X	XXXXXXXXPPPPPPPPPPPPPPPXXXXXXXX	STTFVEAS(0.998)PVVQT(0.002)QK	8	2	-1.198			8634;8635	8635	1.18759	1.28017	1.01906	-0.103138	-0.128192	-0.126991	7.57808e-05	1.28171	2.43128
K7VHU4	103638601	K7VHU4;A0A3L6DI42	112;112	K7VHU4	4.19e-26	120.14	1	S	RLPDRGNRARLQTILSGKDGLVAAPPPERRR	X;X;X;X;X;X;X;X;X;X;X;X;X;X;X;Phospho (STY);X;X;X;X;X;X;X;X;X;X;X;X;X;X;X	XXXXXXXXXXPPPPPPPPPPPPPPPPPPPXX	LQT(0.002)ILS(0.998)GKDGLVAAPPPER	6	3	-0.74656			5823;5824	5824	2.61792	2.64916	2.69047	1.00153	0.639932	0.964666	0.000107159	1.78381	3.44335
K7V1C3	ZEAMMB73_Zm00001d010759	K7V1C3;B6SJ54;A0A3L6DJG2	215;215;215	K7V1C3	0.000290953	48.893	1	S	GAEPPPRLLPLFPVTSPRMAQ__________	X;X;X;X;X;X;X;X;X;X;X;X;X;X;X;Phospho (STY);X;X;X;X;X;X;X;X;X;X;X;X;X;X;X	XXXXXXXPPPPPPPPPPPXXXXXXXXXXXXX	LLPLFPVT(0.207)S(0.793)PR	9	2	-3.462			5626	5626	-0.0329057	-0.166279	-0.0958398	-0.855867	-0.442608	-0.794684	0.0111665	0.599378	1.51506
A0A3L6DP96	Zm00014a_004548	A0A3L6DP96;A0A1D6FLL6;A0A1D6FLM1;A0A1D6FLM0	1722;640;849;1473	A0A3L6DP96	0.000142668	44.448	1	S	VPSMPQPRLVTSLPQSPTKVADIGNQGLKKG	X;X;X;X;X;X;X;X;X;X;X;X;X;X;X;Phospho (STY);X;X;X;X;X;X;X;X;X;X;X;X;X;X;X	XXXXXXXXPPPPPPPPPPPXXXXXXXXXXXX	LVTS(0.002)LPQS(0.976)PT(0.022)K	8	3	0.21457			6062	6062	-1.5927	-1.61545	-1.89299	-2.24003	-2.52173	-2.48135	0.00544272	0.713992	1.64034
B6SP02	100281996	B6SP02;A0A3L6DQL8	58;58	B6SP02	0.0102139	54.646	1	S	LRYSRKGNKKSCEAESEE_____________	X;X;X;X;X;X;X;X;X;X;X;X;X;X;X;Phospho (STY);X;X;X;X;X;X;X;X;X;X;X;X;X;X;X	XXXXXXXXXXPPPPPPPPXXXXXXXXXXXXX	SCEAES(1)EE	6	2	0.24207			7527	7527	-1.48854	-1.69703	-1.72858	-2.18714	-2.53746	-2.35726	0.00459283	0.722573	1.65012
A0A3L6DS82	Zm00014a_020766	A0A3L6DS82;B6SR00	152;152	A0A3L6DS82	0.000293491	39.203	1	S	AEQLVGGKQQGGGEESAGGGGLFKMAQGFLK	X;X;X;X;X;X;X;X;X;X;X;X;X;X;X;Phospho (STY);X;X;X;X;X;X;X;X;X;X;X;X;X;X;X	XXXXXXXXPPPPPPPPPPPPPPPPXXXXXXX	QQGGGEES(1)AGGGGLFK	8	3	2.3274			6805	6805	-0.539439	-0.669264	-0.49156	-1.26688	-1.12581	-1.29431	0.00088264	0.662245	1.58254
B6T5R1	100282282	B6T5R1;A0A3L6DTP7	181;181	B6T5R1	0.000471345	51.277	1	S	ESLTKNEGKEGEDGGSTAGLLAKLTVSEGKS	X;X;X;X;X;X;X;X;X;X;X;X;X;X;X;Phospho (STY);X;X;X;X;X;X;X;X;X;X;X;X;X;X;X	XXXXXPPPPPPPPPPPPPPPPPPXXXXXXXX	NEGKEGEDGGS(0.886)T(0.114)AGLLAK	11	3	-0.6532			6334	6334	0.773195	0.513903	0.545129	-0.0494729	-0.198283	0.152165	0.00787356	0.642606	1.56115
B6TV01		B6TV01;B6UI95;A0A3L6DTQ3;K7UU06;B6SRF1;A0A1D6MLW6	62;66;66;66;58;62	B6TV01	0.00117229	21.483	1	S	GRISPSELAAVSRAISPPASSSHGRREVAAM	X;X;X;Phospho (STY);X;X;X;X;X;X;X;X;X;X;X;Phospho (STY);X;X;X;X;X;X;X;X;X;X;X;X;X;X;X	XXXXXXXXXXXXXPPPPPPPPPPPPXXXXXX	AIS(0.869)PPAS(0.044)S(0.044)S(0.044)HGR	3	2	0.71161			444;445;446	445	-0.195777	-0.453922	-0.271487	-0.975812	-1.12349	-1.01292	0.00117747	0.730344	1.65903
B6TV01		B6TV01;B6UI95;A0A3L6DTQ3;K7UU06	50;54;54;54	B6TV01		253.83	1	S	QRVFSRIDADGDGRISPSELAAVSRAISPPA	X;X;X;X;X;X;X;X;X;X;X;X;X;X;X;Phospho (STY);X;X;X;X;X;X;X;X;X;X;X;Phospho (STY);X;X;X	XXXXXXPPPPPPPPPPPPPPPPPPPXXXXXX	IDADGDGRIS(1)PSELAAVSR	10	2	-0.28119			4109;4110;4111;4112;4113;4394	4112	3.67187	3.57895	3.67997	2.66308	2.74809	2.7051	2.08899e-05	0.938177	1.91611
Q9TJN6	RPS17	Q9TJN6;B6TG30;B4G1S9;A0A3L6DU35	122;122;122;122	Q9TJN6	4.86e-26	114.62	1	S	PRDTRRKSQLLPPLQSDDDQEPSSRE_____	X;X;X;X;X;X;X;X;X;X;X;X;X;X;X;Phospho (STY);X;X;X;X;X;X;X;X;X;X;X;X;X;X;X	XXXXXXPPPPPPPPPPPPPPPPPPPPXXXXX	SQLLPPLQS(1)DDDQEPSSRE	9	3	-0.50218			5117;8254;8255;8256;8257;8258	8256	1.94455	1.93347	1.97529	1.32613	1.39117	1.23874	0.000160773	0.63242	1.55016
K7VB33	ZEAMMB73_Zm00001d008878	K7VB33;B6SSL4;A0A3L6DUN9;B6TVQ2;A0A3L6FC80	182;182;182;183;183	B6TVQ2	0.00136077	52.831	1	S	AEDRAIAEKGFYLHPSPRGNAGAGADLQPPP;AEDRAIAEKGFYLHPSPRGNAGAGSDLQPPP	X;X;X;X;X;X;X;X;X;X;X;X;X;X;X;Phospho (STY);X;X;X;X;X;X;X;X;X;X;X;X;X;X;X	XXXXXXXXXPPPPPPPPPXXXXXXXXXXXXX	GFYLHPS(1)PR	7	2	0.91343			2550;2551	2550	-0.162358	-0.177831	-0.00891669	-1.03596	-1.20436	-0.728226	0.00428022	0.873145	1.83165
K7VB33	ZEAMMB73_Zm00001d008878	K7VB33;B6SSL4;A0A3L6DUN9	207;207;207	K7VB33	0.000184421	46.943	1	S	DLQPPPRLLPLFPVQSPTARP__________	X;X;X;X;X;X;X;X;X;X;X;X;X;X;X;Phospho (STY);X;X;X;X;X;X;X;X;X;X;X;X;X;X;X	XXXXXXXPPPPPPPPPPPPPPXXXXXXXXXX	LLPLFPVQS(0.789)PT(0.211)ARP	9	3	0.3621			5621;5622	5621	-0.129406	-0.173169	-0.0821269	-0.735345	-0.791954	-0.688883	0.000104746	0.610493	1.52678
A0A3L6DVJ7	ALY2_2	A0A3L6DVJ7;B4FF68;B6UC53	56;56;56	A0A3L6DVJ7	6.95e-08	92.218	1	S	APYPPAAPKARAAADSPYGVYSKHIAAIAPP	X;X;X;X;X;X;X;X;X;X;X;X;X;X;X;Phospho (STY);X;X;X;X;X;X;X;X;X;X;X;X;X;X;X	XXXXXXXXXXXPPPPPPPPPPPPXXXXXXXX	AAADS(1)PYGVYSK	5	2	0.43461			16;17	17	1.23498	1.29113	1.37083	0.45353	0.413343	0.413211	3.06713e-05	0.872285	1.83056
A0A3L6DW59	Zm00014a_014285	A0A3L6DW59;K7VC40	203;211	A0A3L6DW59	6.9e-19	120.97	1	S	ATLGSLVAYDDDDDESGEDVD__________	X;X;X;X;X;X;X;X;X;X;X;X;X;X;X;Phospho (STY);X;X;X;X;X;X;X;X;X;X;X;X;X;X;X	PPPPPPPPPPPPPPPPPPPPPXXXXXXXXXX	ATLGSLVAYDDDDDES(1)GEDVD	16	2	-2.0034			1050	1050	0.928799	0.926759	0.893899	0.176536	0.170827	0.0621426	3.64992e-05	0.779983	1.71711
Q8W120	hon102	Q8W120;B4FQA5;B6SP93;A0A3L6DXB4;B4F9A5;A0A1D6HU99;B6T1D7	146;146;146;146;199;86;146	Q8W120	0.00017335	72.787	1	S	AAKPKAPKAAPKPKPSPKAKAKTASKPKAAS	X;X;X;X;X;X;X;X;X;X;X;X;X;X;X;Phospho (STY);X;X;X;X;X;X;X;X;X;X;X;X;X;X;Phospho (STY)	XXXXXXXXPPPPPPPPPPXXXXXXXXXXXXX	AAPKPKPS(1)PK	8	4	0.072891			115;116;117;118;119	119	4.04947	3.97031	3.82403	3.03887	3.69458	3.08164	0.0380991	0.676244	1.59797
Q8W120	hon102	Q8W120;B4FQA5;B6SP93;A0A3L6DXB4;B4F9A5;A0A1D6HU99;B6T1D7	161;161;161;161;214;101;161	Q8W120	0.00716326	30.801	1	S	SPKAKAKTASKPKAASPKPKAKAKAKPVAPA	Phospho (STY);X;X;X;X;X;X;X;X;X;X;X;X;X;X;Phospho (STY);X;X;X;X;X;X;X;X;X;X;X;X;X;X;X	XXXXXXXXXXXXXPPPPPPPXXXXXXXXXXX	AAS(1)PKPK	3	3	0.064023			148	148	1.55336	1.49731	1.90519	0.803658	0.744595	0.873009	0.00314089	0.844867	1.7961
Q8W120	hon102	Q8W120;B4FQA5;B6SP93;A0A3L6DXB4;B4F9A5;A0A1D6HU99;B6T1D7	179;179;181;183;232;119;181	Q8W120	7.64e-15	102.44	1	S	PKAKAKAKPVAPAAASPKPRGRPPKVAKTSA	X;X;X;X;X;X;X;X;X;X;X;X;X;X;X;Phospho (STY);X;X;X;X;X;X;X;X;X;X;X;X;X;X;X	XXXXXXPPPPPPPPPPPPPPXXXXXXXXXXX	AKPVAPAAAS(1)PKPR	10	4	-0.10093			488;489	489	1.72883	1.66344	1.55056	0.632015	0.758522	0.567534	0.000202061	0.994918	1.99297
O24561	Lhcb4*1	O24561;A0A3L6DZI4	221;221	O24561	6.48e-08	84.058	1	S	RNAELDPEKRLYPGGSYFDPLGLAADPEKKE	X;X;X;X;X;X;X;X;X;X;X;X;X;X;X;Phospho (STY);X;X;X;X;X;X;X;X;X;X;X;X;X;X;X	XXXXXXXXXXPPPPPPPPPPPPPPPPPPPPX	LYPGGS(1)YFDPLGLAADPEKK	6	3	2.5577			6091;6092	6091	1.19099	1.15086	1.2654	0.653379	0.695013	0.361845	0.00454686	0.632338	1.55008
B6T694	Zm00014a_038031	B6T694;A0A3L6E087	149;149	B6T694	3.22e-06	66.549	1	S	PVNSPKVSVVSQLELSPKRRCNIRDLTKGVV	X;X;X;X;X;X;X;X;X;X;X;X;X;X;X;Phospho (STY);X;X;X;X;X;X;X;X;X;X;X;X;X;X;X	XXXXXXPPPPPPPPPPPPXXXXXXXXXXXXX	VSVVSQLELS(1)PK	10	3	-0.13323			9976	9976	-1.40624	-1.43885	-1.62825	-2.01161	-2.22635	-2.04538	0.00328637	0.603334	1.51922
B4FQ57	ZEAMMB73_Zm00001d021707	B4FQ57;A0A3L6E0W5;B4FGE3;B6TJN3;B4FIA6;A0A3L6FPI4;B6UFF8	10;10;10;10;10;10;10	B4FQ57	0.00756684	37.148	1	S	______MAGRGKAIGSGAAKKAMSRSSKAGL	X;X;X;X;X;X;X;X;X;X;X;X;X;X;X;Phospho (STY);X;X;X;X;X;X;X;X;X;X;X;X;X;X;X	XXXXXXXXXXXXPPPPPPPPXXXXXXXXXXX	AIGS(1)GAAK	4	2	-0.060909			426	426	-0.742897	-0.802373	-0.805355	-1.32247	-1.45769	-1.42984	0.000175054	0.619793	1.53665
B4FQ57	ZEAMMB73_Zm00001d021707	B4FQ57;A0A3L6E0W5	122;122	B4FQ57	0.0121431	14.802	1	S	GGVMPNIHNLLLPKKSGGGSAKAAAGDED__	X;X;X;X;X;X;X;X;X;X;X;X;X;X;X;Phospho (STY);X;X;X;X;X;X;X;X;X;X;X;X;X;X;X	XXXXXXXXXXXXXXPPPPPPPPXXXXXXXXX	KS(0.997)GGGS(0.003)AK	2	3	0.75297			5101	5101	1.93071	1.81191	1.77494	0.767866	0.777161	0.790726	2.37343e-05	1.0606	2.0858
E3UMH7	GRF10b	E3UMH7;A5HEG9;A0A3L6E361	177;252;256	E3UMH7	0.00143299	33.799	1	S	APGKATEGAKKADDKSPSSKKLAVAAPAAVQ	X;X;X;X;X;X;X;X;X;X;X;X;X;X;X;Phospho (STY);X;X;X;X;X;X;X;X;X;X;X;X;X;X;X	XXXXXXXXXXPPPPPPPPPPXXXXXXXXXXX	KADDKS(0.984)PS(0.015)S(0.001)K	6	4	-2.0648			4479	4479	1.23357	1.34634	1.38519	0.869481	0.517661	0.705422	0.00497353	0.624177	1.54133
B4F9X5	100191722	B4F9X5;A0A3L6E3L0	180;180	B4F9X5	0.000336144	56.387	1	S	QPHLPARLTPPVAAPSPRSTPPLVSPLPRAT	X;X;X;X;X;X;X;X;X;X;X;X;X;X;X;Phospho (STY);X;X;X;X;X;X;X;X;Phospho (STY);X;X;X;X;X;X	XXXXXXXPPPPPPPPPPPXXXXXXXXXXXXX	LTPPVAAPS(1)PR	9	2	0.17354			5971;5972;5973	5972	1.16354	0.981337	0.948276	0.3117	0.322927	0.256335	0.000468003	0.734063	1.66332
A0A3L6E4E5	TIC_0	A0A3L6E4E5;A0A1D6IHB6;A0A1D6IHB5;A0A1D6IHB7;A0A1D6IHB9;A0A1D6IHB1;A0A1D6IHB8;A0A1D6IHB4;A0A1D6IHB0;C4JB57	1430;1406;1386;1377;931;879;931;931;814;91	A0A3L6E4E5	1.2e-12	96.717	1	S	ATGNAKGVQQPVQLPSPQQQSAKNSASTSGS	X;X;X;X;X;X;X;X;X;X;X;X;X;X;X;Phospho (STY);X;X;X;X;X;X;X;X;X;X;X;X;X;X;X	XXXXXXPPPPPPPPPPPPPPPPPXXXXXXXX	GVQQPVQLPS(1)PQQQSAK	10	3	-1.4557			3725;3726	3726	0.471019	0.474263	0.603905	-0.18249	-0.166967	-0.212072	0.000104047	0.703573	1.62853
A0A3L6E4E5	TIC_0	A0A3L6E4E5;A0A1D6IHB6;A0A1D6IHB5;A0A1D6IHB7;A0A1D6IHB9;A0A1D6IHB1;A0A1D6IHB8;A0A1D6IHB4	587;562;542;533;87;87;87;87	A0A3L6E4E5	0.000111028	48.269	1	S	TLQLDLEKPSLGDEKSPSERRQPQPQPQQLQ	X;X;X;X;X;X;X;X;X;X;X;X;X;X;X;Phospho (STY);X;X;X;X;X;X;X;X;X;X;X;X;X;X;X	PPPPPPPPPPPPPPPPPPPPXXXXXXXXXXX	LTLQLDLEKPS(0.013)LGDEKS(0.959)PS(0.028)ER	17	4	-0.45721			5960	5960	0.420725	0.398866	0.429545	-0.463929	-0.442704	-0.252332	0.0002929	0.8027	1.74436
A0A3L6E4E5	TIC_0	A0A3L6E4E5;A0A1D6IHB6;A0A1D6IHB5;A0A1D6IHB7;A0A1D6IHB9;A0A1D6IHB1;A0A1D6IHB8;A0A1D6IHB4;A0A1D6IHB0;A0A1D6EZ77;A0A1D6EZ81;A0A1D6EZ78;C4JB57;A0A3L6FW43;A0A1D6EZ83;C0HID9;A0A1D6EZ79;A0A1D6EZ84;A0A1D6EZ80;A0A1D6EZ82	1412;1388;1368;1359;913;861;913;913;796;1361;1361;1361;73;1361;1312;195;1231;1113;945;1265	A0A3L6E4E5	6.34e-08	87.742	1	S	ASGSPSNSVSKSTGGSPPATGNAKGVQQPVQ	X;X;X;Phospho (STY);X;X;X;X;X;X;X;X;X;X;X;Phospho (STY);X;X;X;X;X;X;X;X;X;X;X;X;X;X;X	XXXXXXXXXXXPPPPPPPPPPPPPXXXXXXX	STGGS(1)PPATGNAK	5	2	0.57609			8550	8550	-0.314971	-0.59297	-0.41746	-1.0003	-1.13187	-1.31955	0.0045217	0.708775	1.63442
A0A3L6E4E5	TIC_0	A0A3L6E4E5;A0A1D6IHB6;A0A1D6IHB5;A0A1D6IHB7;A0A1D6IHB9;A0A1D6IHB1;A0A1D6IHB8;A0A1D6IHB4;A0A1D6IHB0;A0A1D6EZ77;A0A1D6EZ81;A0A1D6EZ78;A0A3L6FW43;A0A1D6EZ83;C0HID9;A0A1D6EZ79;A0A1D6EZ84;A0A1D6EZ80;A0A1D6EZ82	1311;1287;1267;1258;812;760;812;812;695;1259;1259;1259;1259;1210;93;1129;1011;843;1163	A0A3L6E4E5	0.0113205	28.142	1	S	QNMMYPSSAAQGRVQSPQLKASSGRGTPSST	X;X;X;X;X;X;X;X;X;X;X;X;X;X;X;Phospho (STY);X;X;X;X;X;X;X;X;X;X;X;X;X;X;X	XXXXXXXXXXXXXPPPPPPPXXXXXXXXXXX	VQS(1)PQLK	3	2	0.2392			9880	9880	0.751063	0.699954	0.838739	-0.0645776	-0.217927	0.0449068	0.000617686	0.842451	1.79309
A0A3L6E5Y2	DRP2A_1	A0A3L6E5Y2;B6UEQ3	731;843	A0A3L6E5Y2	7.87e-13	92.95	1;2	S	RASVSSYSNDTTEAESPRTPSRSGEDWRSAF	X;X;X;X;X;X;X;X;X;X;X;X;X;X;X;Phospho (STY);X;X;Phospho (STY);X;X;X;X;X;X;X;X;X;X;X;X	XPPPPPPPPPPPPPPPPPPPPPXXXXXXXXX	ASVSSYSNDT(0.001)T(0.001)EAES(0.998)PR	15	2	-0.26533			997;998;999;1000;1001;1002	998	1.68981	1.7741	1.52791	-0.0599104	-0.377058	-0.241918	8.55161e-05	1.89024	3.70696
A0A3L6EDZ2	CDKF-1_1	A0A3L6EDZ2;A0A3L6E8C6	424;466	A0A3L6EDZ2	1.79e-05	56.324	1	S	NYRDGVSRIDFDEFGSMDATKTEKGFSIHFS	X;Phospho (STY);X;X;X;X;X;X;X;X;X;X;X;X;X;Phospho (STY);Oxidation (M);X;X;X;X;X;X;X;X;X;X;X;X;X;X	XXXXXXXXPPPPPPPPPPPPPXXXXXXXXXX	IDFDEFGS(0.998)MDAT(0.002)K	8	3	2.2922			4121	4121	-0.363588	-0.445005	-0.379492	-1.50536	-1.45502	-1.61824	3.15065e-05	1.13018	2.18886
B4G1E6	100191540	B4G1E6;B4F957;A0A3L6E8Z0;B6T4Q5	129;129;129;129	B4G1E6	1.53e-10	92.897	1	S	SGFGSGYGRKKQEEESYGSGYGRKPQAEESY;SGFGSGYGRKKQEEESYGSGYGRKPQVEESY	X;X;X;X;X;X;X;X;X;X;X;X;X;X;X;Phospho (STY);X;X;X;X;X;X;X;X;X;X;X;X;X;X;Phospho (STY)	XXXXXXXXXPPPPPPPPPPPPPPXXXXXXXX	KKQEEES(1)YGSGYGR	7	4	0.21842			4860;4861	4861	1.13683	1.08976	1.09767	0.360179	0.539726	0.300047	0.000647479	0.708106	1.63366
B4G1E6	100191540	B4G1E6;B4F957;A0A3L6E8Z0;B6T4Q5	239;287;287;285	B4G1E6	5.67e-38	125.49	1	S	GYGYGRKNEEQSYGGSGYGYEKKASEEDEGA	X;X;X;X;X;X;X;X;X;X;X;X;X;X;X;Phospho (STY);X;X;X;X;X;X;X;X;Phospho (STY);X;X;X;X;X;X	XXXXXXPPPPPPPPPPPPPPPPXXXXXXXXX	KNEEQSYGGS(1)GYGYEK	10	3	-1.1934			4938	4938	2.29075	2.22731	2.29072	1.51388	1.39694	1.39783	4.66636e-05	0.833376	1.78185
A0A3L6EBH4	SPBC800.10c_1	A0A3L6EBH4;A0A1D6LUR7;A0A1D6LUR8;A0A1D6LUS0;A0A1D6LUR6;A0A1D6LUS4;A0A1D6LUR9	1037;445;503;644;692;804;1041	A0A3L6EBH4	0.0110777	33.452	1	S	PMQRSLFDSGPSRAESPTAGSVYGKEQKGFF	X;X;X;X;X;X;X;X;X;X;X;X;X;X;X;Phospho (STY);X;X;X;X;X;X;X;X;X;X;X;X;X;X;X	XXXXXXXXXXXXXPPPPPPPPPPPPXXXXXX	AES(0.978)PT(0.019)AGS(0.003)VYGK	3	2	-0.18982			272	272	-2.46576	-2.17178	-1.93104	-3.43393	-3.33458	-2.77678	0.0179908	0.992242	1.98927
A0A3L6ECH6	PSY1R_5	A0A3L6ECH6	9	A0A3L6ECH6	0.0182367	18.844	2	S	_______MDLRTADFSLNKFNGTIPESIYAC	X;X;X;X;X;X;X;X;X;X;X;Phospho (STY);X;X;X;Phospho (STY);X;X;X;X;X;X;X;X;X;X;X;X;X;X;X	XXXXXXXXPPPPPPPPPPPXXXXXXXXXXXX	DLRT(1)ADFS(1)LNK	8	2	-4.3157			1447	1447	2.2501	1.85221	2.13135	1.40833	1.48993	1.48926	0.00705287	0.615376	1.53196
B6T3T4	100282121	B6T3T4;C0HFB0;A0A3L6ED07	318;321;321	B6T3T4	4.71e-42	92.399	1	S	SAPEKHVFSRFQTTSSPSRGTESSGGHASPP	X;X;X;X;X;X;X;X;X;X;X;X;X;X;X;Phospho (STY);X;X;X;X;X;X;X;X;X;X;X;X;X;X;X	XXXXXXXXXXPPPPPPPPPXXXXXXXXXXXX	FQTTS(0.001)S(0.999)PSR	6	2	0.33239			2294	2294	0.505337	0.387349	0.63489	-0.0210632	-0.59977	0.0503793	0.0326074	0.699343	1.62377
B4FBC9	100192106	B4FBC9;A0A3L6ED76	60;141	B4FBC9	5.32e-13	60.939	1	S	AEAEAGAEEKAAEADSEEEKKAEEAEEAAAG	X;X;X;X;X;X;X;X;X;X;X;X;X;X;X;Phospho (STY);X;X;X;X;X;X;X;X;X;X;X;X;X;X;X	XXXXXXXXXXPPPPPPPPPPPPPPPPPPPPP	AAEADS(1)EEEKKAEEAEEAAAGDEAAVIDGTGSFK	6	4	0.35989			50	50	0.163391	0.379723	0.342825	-0.967908	-0.922829	-1.37904	0.000974075	1.38524	2.61215
A0A3L6EI25	RZ1C	A0A3L6EI25	197	A0A3L6EI25	0.000448711	52.371	1	S	DKYAGGRDRYANDRYSAGGDHFDGDRYGGGP	X;X;X;X;X;X;X;X;X;X;X;X;X;X;X;Phospho (STY);X;X;X;X;X;X;X;X;X;X;X;X;X;X;X	XXXXXXXXXPPPPPPPPPPPPPPPPPXXXXX	YANDRYS(1)AGGDHFDGDR	7	3	0.73211			10216	10216	0.760187	0.676307	0.6241	-0.642295	-0.248016	-0.411175	0.000756962	1.12069	2.17451
A0A3L6EIG1	At1g56130_3	A0A3L6EIG1	190	A0A3L6EIG1	0.000481798	45.807	1	S	DFGLARLLPDDHSHLSTKFAGTLGYTAPEYA	X;X;X;X;X;X;X;X;X;X;X;X;X;X;X;Phospho (STY);X;X;X;X;X;X;X;X;X;X;X;X;X;X;X	XXXXXXPPPPPPPPPPPPXXXXXXXXXXXXX	LLPDDHS(0.007)HLS(0.833)T(0.16)K	10	3	3.3353			5614	5614	-0.872825	-0.920882	-0.941294	-1.80484	-1.75196	-1.86268	1.90225e-05	0.894827	1.85939
B4FUX9	100273359	B4FUX9;A0A3L6EKM7	106;106	B4FUX9	0.0403273	17.046	1	S	LPHDEQLRGGKLAPVSLPKFEDPISAETAEP	X;X;X;X;X;X;X;X;X;X;X;X;X;X;X;Phospho (STY);X;X;X;X;X;X;X;X;X;X;X;X;X;X;X	XXXXXXXXXXXPPPPPPPPXXXXXXXXXXXX	LAPVS(1)LPK	5	2	-0.42045			5264	5264	0.818214	0.796352	0.830024	-0.909404	-0.66869	-0.706841	3.08303e-05	1.57651	2.98247
C0PDS6	100383169	C0PDS6;C0P6C4;A0A3L6EM32	18;18;18	C0PDS6	0.000819548	46.542	1	S	DDATVGSRQRQQQPASPAAADSRAMMAELDA	X;X;X;X;X;X;X;X;X;X;X;X;X;X;X;Phospho (STY);X;X;X;X;X;X;X;X;X;X;X;X;X;X;X	XXXXXXXXXXPPPPPPPPPPPPPXXXXXXXX	QQQPAS(0.996)PAAADS(0.004)R	6	2	-0.49149			6813;6814	6814	-1.87866	-2.31472	-2.1398	-2.45707	-2.98023	-2.72405	0.0365326	0.609387	1.52561
B4G1H1	ZEAMMB73_Zm00001d017547	B4G1H1;A0A3L6EME8;B6TN77;B6SS21;B6UFE3;B7U627;Q41824;C4J477;A0A3L6EYU6	33;33;33;33;33;31;31;31;31	B4G1H1	9.88e-10	74.519	1	S	AQDQENEVKDRGLLDSLLGRNKHDDQEKKNQ;DAADQVDVKDRGLLDSLLGRKKHDDDQEKKK	X;X;X;X;X;X;X;X;X;X;X;X;X;X;X;Phospho (STY);X;X;X;X;X;X;X;X;X;X;X;X;X;X;X	XXXXXXXXXXXPPPPPPPPPXXXXXXXXXXX	GLLDS(1)LLGR	5	2	-1.1249			3453	3453	-0.54639	-0.620485	-0.521443	-1.63181	-1.41386	-1.61121	0.000196392	0.989519	1.98552
A0A3L6ENV9	Zm00014a_019081	A0A3L6ENV9	85	A0A3L6ENV9	2.18e-28	110.41	1	S	AAAARPTPGLNLRSYSASYAASYGPSLVGGG	X;X;X;X;X;X;X;X;X;X;X;X;X;X;X;Phospho (STY);X;X;X;X;X;X;X;X;X;X;X;X;X;X;X	XXXXXXXXXXXXXPPPPPPPPPPPPPPPPPP	S(0.18)YS(0.768)AS(0.052)YAASYGPSLVGGGGGGGGGGGELK	3	3	-0.1117			8775	8775	0.416883	0.48931	0.635131	-0.446998	-0.553604	-0.47294	0.000150808	1.00496	2.00688
A0A3L6ENZ1	CCH	A0A3L6ENZ1;B6SHX8;B6ST82;B6SQL3	24;27;27;27	A0A3L6ENZ1	1.71e-18	92.995	1	S	AMSCEGCAGAVRRVLSKMEGVETFDIDLKEQ	X;X;X;X;X;X;X;X;X;X;X;X;X;X;X;Phospho (STY);X;Oxidation (M);X;X;X;X;X;X;X;X;X;X;X;X;X	XXXXXXXXXXXXPPPPPPPPPPPPPPPPPXX	RVLS(1)KMEGVETFDIDLK	4	3	-0.80189			7332;7333;7334;7335;7336;9789;9790	7336	4.06464	3.96013	4.00429	2.8972	2.94633	2.91502	5.33007e-06	1.09017	2.12899
B6TML1	N6AMT1_2	B6TML1;A0A3L6EPR3	253;253	B6TML1	5.99e-05	62.427	1	S	SLYVLKFWRDPHAVTSASPKSSGSESWFSQL	X;X;X;X;X;X;X;X;X;X;X;X;X;X;X;Phospho (STY);X;X;X;X;X;X;X;X;X;X;X;X;X;X;X	XXXXXXXXXPPPPPPPPPPPXXXXXXXXXXX	DPHAVT(0.078)S(0.917)AS(0.005)PK	7	3	0.5854			1511	1511	0.267819	0.423876	0.330196	-2.22458	-1.9969	-2.03157	8.61103e-06	2.42498	5.37023
B6TML1	N6AMT1_2	B6TML1;A0A3L6EPR3	255;255	B6TML1	1.35e-05	60.182	1	S	YVLKFWRDPHAVTSASPKSSGSESWFSQLHF	X;X;X;X;X;X;X;X;X;X;X;X;X;X;X;Phospho (STY);X;X;X;X;X;X;X;X;X;X;X;X;X;X;X	XXXXPPPPPPPPPPPPPPXXXXXXXXXXXXX	FWRDPHAVTS(0.019)AS(0.98)PK	12	4	-0.64778			2384	2384	-0.48538	-0.593072	-0.812308	-3.01147	-2.94933	-3.19919	3.79605e-05	2.42308	5.36313
B6SXR0	Zm00014a_042826	B6SXR0;A0A3L6EQ79	107;106	B6SXR0	0.000873359	40.605	1	S	GEREESRAVNPGYPASPPRPGPRPTHAAQNG	X;X;X;X;X;X;X;X;X;X;X;X;X;X;X;Phospho (STY);X;X;X;X;X;X;X;X;X;X;X;X;X;X;X	XXXXXXXPPPPPPPPPPPPPPPPXXXXXXXX	AVNPGY(0.001)PAS(0.999)PPRPGPR	9	3	0.16336			1205	1205	-1.05273	-0.956817	-1.01665	-1.82506	-1.34504	-1.80944	0.0152084	0.65111	1.57038
A0A3L6ERV5	Zm00014a_035370	A0A3L6ERV5;O82107	133;133	A0A3L6ERV5	0.00909732	26.341	1	S	PSPSPRPRPQVKRVSSAGLLLGSVLRRKTEN	X;X;X;X;X;X;X;X;X;X;X;X;X;X;X;Phospho (STY);X;X;X;X;X;X;X;X;X;X;X;X;X;X;X	XXXXXXXXXXXXXPPPPPPPPPPPPPXXXXX	VS(0.085)S(0.915)AGLLLGSVLR	3	2	1.8749			9939	9939	0.115327	0.243994	0.0270902	-0.691666	-0.570634	-0.600467	0.00049992	0.749726	1.68147
A0A3L6ETJ0	TSS_2	A0A3L6ETJ0	1264	A0A3L6ETJ0	7.28e-09	72.59	1;2;3	S	SENGRYKGRGTSNFSSPRVSPSEAAVSIGST	X;X;X;X;X;X;X;X;X;X;X;X;X;X;X;Phospho (STY);X;X;X;Phospho (STY);X;X;X;X;X;X;Phospho (STY);X;X;X;Phospho (STY)	XXXXXXXXXPPPPPPPPPPPPPPPPPPPPPP	GT(0.001)S(0.001)NFS(0.096)S(0.902)PR	7	2	-0.16559			3697;3698;3700;3701	3697	3.18387	3.14116	3.30259	1.32392	1.39829	1.37686	4.11625e-06	1.84285	3.58718
A0A3L6ETJ0	TSS_2	A0A3L6ETJ0	1268	A0A3L6ETJ0	7.28e-09	72.59	1;2	S	RYKGRGTSNFSSPRVSPSEAAVSIGSTPLAK	X;X;X;X;X;X;X;X;X;X;X;Phospho (STY);X;X;X;Phospho (STY);X;X;X;X;X;X;X;X;X;X;X;X;X;X;X	XXXXXPPPPPPPPPPPPPPPPPPPPPPPPPP	GT(0.019)S(0.022)NFS(0.452)S(0.51)PRVS(0.84)PS(0.158)EAAVSIGSTPLAK	11	4	-0.76343			3701;9934	3701	1.58003	1.47921	1.61492	0.00546015	0.232847	0.0922268	4.89428e-05	1.44788	2.72806
A0A3L6ETJ0	TSS_2	A0A3L6ETJ0	1275	A0A3L6ETJ0	5.18e-06	49	3	S	SNFSSPRVSPSEAAVSIGSTPLAKKLAKSSS	X;X;X;X;Phospho (STY);X;X;X;X;X;X;X;X;X;X;Phospho (STY);X;X;X;Phospho (STY);X;X;X;X;X;X;X;X;X;X;Phospho (STY)	PPPPPPPPPPPPPPPPPPPPPPPPXXXXXXX	GT(0.007)S(0.026)NFS(0.451)S(0.514)PRVS(0.076)PS(0.075)EAAVS(0.776)IGS(0.293)T(0.78)PLAK	18	3	0.3001			3698	3698	1.44132	1.46336	1.67849	-0.420553	-0.538492	-0.441022	1.86127e-05	1.99441	3.98454
A0A3L6EU98	Zm00014a_012507	A0A3L6EU98;B4FFP8	149;172	B4FFP8	0.0171223	28.963	1	S	LPALADPALRVRKDFSFTRKPSEKRGSRRFE	X;X;X;X;X;X;X;X;X;X;X;X;X;X;X;Phospho (STY);X;X;X;X;X;X;X;X;X;X;X;X;X;X;X	XXXXXXXXXXXXPPPPPPPXXXXXXXXXXXX	KDFS(0.948)FT(0.052)R	4	3	0.2314			4535	4535	-0.377594	-0.645462	-0.89003	-1.37096	-1.55649	-1.29407	0.0100198	0.769479	1.70465
A0A3L6EU98	Zm00014a_012507	A0A3L6EU98;B4FFP8	75;98	B4FFP8	1.21e-09	95.577	1	S	NKQSSKSARTTKRGESLEKPNFEGRRSSSSR	X;X;X;X;X;X;X;X;X;X;X;X;X;X;X;Phospho (STY);X;X;X;X;X;X;X;X;X;X;X;X;X;X;X	XXXXXXXXXXXXPPPPPPPPPPPPPXXXXXX	RGES(1)LEKPNFEGR	4	3	0.17287			6981	6981	0.441219	0.507372	0.501171	-0.12613	-0.0144486	-0.193046	0.000452083	0.594462	1.50991
A0A3L6EUH7	Zm00014a_034448	A0A3L6EUH7	166	A0A3L6EUH7	3.18e-48	128.67	1	S	KEVAKSAITDNALPSSPVTVSEASKPSDDFP	X;X;X;X;X;X;X;X;X;X;X;X;X;X;X;Phospho (STY);X;X;X;X;X;X;X;X;X;X;X;X;X;X;X	XXXXXPPPPPPPPPPPPPPPPPPPPPPPPPP	SAITDNALPS(0.024)S(0.973)PVT(0.003)VSEASKPSDDFPEFK	11	3	0.52398			7410	7410	2.34542	2.41469	2.32159	-0.735393	-0.524524	-1.09563	4.9097e-05	3.14575	8.85045
A0A3L6EVZ2	SR45A_8	A0A3L6EVZ2;B4FSY2;A0A1D6GWH2;A0A1D6GWH3	239;242;340;367	A0A3L6EVZ2	9.29e-32	148.95	1	S	RDPRDYYESRGGRGYSPPPYGGGRSRRDRSV	X;X;X;X;X;X;X;X;X;X;X;X;X;X;X;Phospho (STY);X;X;X;X;X;X;X;X;X;X;X;X;X;X;X	XXXXXXXXXXXXXPPPPPPPPPPPXXXXXXX	GYS(1)PPPYGGGR	3	2	0.043332			3766;3767;3768;3769	3768	2.40418	2.34054	2.27783	1.79639	1.5757	1.82817	0.00224874	0.607431	1.52354
A0A3L6EVZ2	SR45A_8	A0A3L6EVZ2;B4FSY2;A0A1D6GWH2;A0A1D6GWH3	186;189;287;314	A0A3L6EVZ2	6.59e-05	48.472	1	S	DEYYGNGGGGYGYRRSPPPMYSSYRESRDYY	X;X;X;X;X;X;X;X;X;X;X;X;X;X;X;Phospho (STY);X;X;X;Oxidation (M);X;X;X;X;X;X;X;X;X;X;X	XXXXXXXXXXXXXXPPPPPPPPPPPXXXXXX	S(1)PPPMYSSYR	1	2	0.47032			7259;7260;8181;8182;8183;8184;8185	8181	2.85763	2.92204	2.92024	2.28691	2.29015	2.21035	4.54089e-05	0.637504	1.55564
A0A3L6EX94	Os11g0599500	A0A3L6EX94;K7U9C9	76;76	A0A3L6EX94	0.0010986	44.174	1	S	PRSTAGLLTRTGGGSSFGAGGGGGFGGGRAR	X;X;X;X;X;X;X;X;X;X;X;X;X;X;X;Phospho (STY);X;X;X;X;X;X;X;X;X;X;X;X;X;X;X	XXXXXXXXXXPPPPPPPPPPPPPPPPPPPXX	T(0.007)GGGS(0.029)S(0.964)FGAGGGGGFGGGR	6	2	-0.0013018			9049;9050	9049	0.718716	0.780641	0.675138	-1.43946	-1.22342	-1.75083	0.000148171	2.19607	4.58228
A0A3L6EYZ6	CAP1_1	A0A3L6EYZ6	232	A0A3L6EYZ6	3.15e-36	133.67	1	S	PPPAPPTAPLFSTEKSPKSSKPKEGMSAVFQ	X;X;X;X;X;X;X;X;X;X;X;X;X;X;X;Phospho (STY);X;X;X;X;X;X;X;X;X;X;X;X;X;X;X	PPPPPPPPPPPPPPPPPPXXXXXXXXXXXXX	APPPPAPPT(0.002)APLFS(0.078)T(0.01)EKS(0.909)PK	18	4	0.118			722	722	1.3551	1.50318	1.70433	-1.13342	-1.49579	-1.25369	4.3758e-05	2.81517	7.03801
B4F9M6	100191655	B4F9M6;A0A3L6F001	32;32	B4F9M6	1.08e-19	86.69	1	S	PPPRRTGFSSGPPPASPPAGGAPSYNSVAPP	X;X;X;X;X;X;X;X;X;X;X;X;X;X;X;Phospho (STY);X;X;X;X;X;X;X;X;X;X;X;X;X;X;X	XXXXXPPPPPPPPPPPPPPPPPPPPPPPPPP	TGFSSGPPPAS(1)PPAGGAPSYNSVAPPPDEIQLAK	11	4	0.77849			9045;9046;9047	9047	1.86356	1.8462	1.97814	1.11434	1.18194	1.18394	9.95639e-05	0.735893	1.66543
K7U0Z2	103654114	K7U0Z2;K7UZV2;A0A3L6F5D1	206;206;206	K7U0Z2	1.76e-169	214.56	1	S	GSDGLIGLSDASALGSPRKSFADALQENISR	X;X;X;X;X;X;X;X;X;X;X;X;X;X;X;Phospho (STY);X;X;X;X;X;X;X;X;X;X;X;X;X;X;X	PPPPPPPPPPPPPPPPPPPXXXXXXXXXXXX	GSDGLIGLSDASALGS(1)PR	16	2	2.0968			3620;3621;3622	3621	2.61997	2.52826	2.69912	1.93297	1.73652	2.03418	0.00205697	0.714562	1.64098
B6TVQ2	100284623	B6TVQ2;A0A3L6FC80	17;17	B6TVQ2	4.38e-16	83.611	1	S	DAGAATAARERPAPPSPVPVPQASPDPSNPF	X;X;X;X;X;X;X;X;X;X;X;X;X;X;X;Phospho (STY);X;X;X;X;X;X;X;X;X;X;X;X;X;X;X	XXXXXXXXXPPPPPPPPPPPPPPPPPPPPPP	ERPAPPS(1)PVPVPQASPDPSNPFPTTFVQADTTSFK	7	4	0.22484			1973	1973	0.0337909	-0.00269256	0.201596	-0.530735	-0.589826	-0.610397	0.000625156	0.654551	1.57413
B4F7Z6	100191202	B4F7Z6;A0A3L6FDI2	69;69	B4F7Z6	0.000305865	48.661	1	S	FLHRLLLSSPAPQLRSPLAARSQASPPSLPP	X;X;X;X;X;X;X;X;X;X;X;X;X;X;X;Phospho (STY);X;X;X;X;X;X;X;X;X;X;X;X;X;X;X	XXXXPPPPPPPPPPPPPPPPPXXXXXXXXXX	LLLS(0.001)S(0.004)PAPQLRS(0.995)PLAAR	12	3	-0.53212			5611	5611	0.0688946	0.0470203	-0.104678	-0.889464	-0.728613	-0.781951	0.000370999	0.803755	1.74564
B6TWU0	VQ4_4	B6TWU0;A0A3L6FDT3;B8A227;A0A1D6NC27	234;234;153;238	B6TWU0	4e-10	105.83	1	S	RGAEPPRLLPLFPVVSPRMAGAAAAPSSE__	X;X;X;X;X;X;X;X;X;X;X;X;X;X;X;Phospho (STY);X;X;X;X;X;X;X;X;X;X;X;X;X;X;X	XXXXXXXPPPPPPPPPPPXXXXXXXXXXXXX	LLPLFPVVS(1)PR	9	3	-0.77755			5627;5628	5628	-0.0684195	-0.182508	-0.292235	-1.51586	-1.73294	-1.40287	0.000298824	1.3695	2.58382
A0A3L6FEG0	RPL12-2_1	A0A3L6FEG0;B6UIC1;B6TRQ9	140;140;22	A0A3L6FEG0	8.01e-17	68.435	1	S	SSARIATIKVVRALTSLALKEAKDLIEGLPK	X;X;X;X;X;X;X;X;X;X;X;X;X;X;X;Phospho (STY);X;X;X;X;X;X;X;X;X;X;X;X;X;X;X	XXXXXXXXXXXXPPPPPPPPXXXXXXXXXXX	ALT(0.09)S(0.91)LALK	4	2	0.27352			594	594	0.907109	0.785773	0.890334	-0.469538	-0.328349	-0.256542	7.77038e-05	1.21255	2.31747
C4J039	100283599	C4J039;B6TJU2;A0A3L6FIZ0	16;16;16	C4J039	0.00735999	25.067	1	S	MKLSIQSLARKLSLPSPKRGGGGIVEDGKKK	X;X;X;X;X;X;Phospho (STY);X;X;X;X;X;X;X;X;Phospho (STY);X;X;X;X;X;X;X;X;X;X;X;X;X;X;X	XXXXXXXXXXPPPPPPPPXXXXXXXXXXXXX	KLS(0.202)LPS(0.798)PK	6	3	0.81923			4896	4896	-0.459593	-0.464435	-0.563544	-2.28111	-2.11628	-2.0397	3.08619e-05	1.64984	3.13799
B4FN55	MAPK3	B4FN55;A0A3L6FJ08	171;171	B4FN55	2.99e-06	67.706	1	S	APELLLNSTDYSAAIDVWSVGCIFME	X;X;X;X;X;X;X;X;X;X;X;X;X;X;X;Phospho (STY);X;X;X;X;X;X;X;X;X;X;X;X;X;X;X	XXXXXXXXPPPPPPPPPPPPXXXXXXXXXXX	NSTDYS(1)AAID	7	3	-0.66375			4855;4856;4949	4949	2.39835	2.23947	2.18486	0.652615	0.687915	0.685104	1.62311e-05	1.78381	3.44335
A0A3L6FJC1	Zm00014a_002599	A0A3L6FJC1	108	A0A3L6FJC1	3.62e-19	96.574	2	S	RIAAATGAAYSDDDDSDEAAAPRQEGEVKKP	X;X;X;X;X;X;X;X;X;Phospho (STY);Phospho (STY);X;X;X;X;Phospho (STY);X;X;X;X;X;X;X;X;X;X;X;X;X;X;X	XPPPPPPPPPPPPPPPPPPPPPPXXXXXXXX	IAAATGAAY(0.744)S(0.257)DDDDS(1)DEAAAPR	15	2	0.65791			4038;4039;4040;4041	4039	0.513413	0.677471	0.521262	-0.674914	-0.771513	-1.17533	0.000880639	1.44464	2.72194
B6TAR3	100282720	B6TAR3;A0A3L6FLD5	215;215	B6TAR3	1.2e-05	67.732	1	S	ASSGNTTSRLISFLASPGSGV__________	X;X;X;X;X;X;X;X;X;X;X;X;X;X;X;Phospho (STY);X;X;X;X;X;X;X;X;X;X;X;X;X;X;X	XXXXXXXXXPPPPPPPPPPPPXXXXXXXXXX	LISFLAS(0.999)PGS(0.001)GV	7	2	0.19381			5522	5522	-2.50625	-2.60951	-2.53871	-3.37001	-3.51084	-2.80598	0.035708	0.677454	1.59932
K4JBV4	100277696	K4JBV4;B4G1M3;A0A3L6FRT6	84;84;84	K4JBV4	7.19e-05	85.227	1	S	YDSDADHRTAPRNAASPSSKPRSTRPRSRSR	X;X;X;X;X;X;X;X;X;X;X;X;X;X;X;Phospho (STY);X;X;X;X;X;X;X;X;X;X;X;X;X;X;X	XXXXXXXXXXXXPPPPPPPPPPXXXXXXXXX	NAAS(0.999)PS(0.001)SKPR	4	3	1.2408			6266	6266	1.78998	1.51269	1.51871	0.750065	0.772871	0.606365	0.0010385	0.89736	1.86265
A0A3L6FVU1	REMO_0	A0A3L6FVU1	53	A0A3L6FVU1	2.8e-06	71.873	1	S	AVIPATDPPPPPADDSKALAIVEKVADEPAP	X;X;X;X;X;X;X;X;X;X;X;X;X;X;X;Phospho (STY);X;X;X;X;X;X;X;X;X;X;X;X;X;X;X	PPPPPPPPPPPPPPPPPPPPPPPPXXXXXXX	AVIPAT(0.004)DPPPPPADDS(0.996)KALAIVEK	16	3	-2.9484			1195	1195	1.35847	1.48806	1.44573	0.0224157	-0.0502472	-0.388374	0.00028821	1.56949	2.96799
A0A3L6FWX5	Zm00014a_006759	A0A3L6FWX5	459	A0A3L6FWX5	1.31e-15	85.067	1	S	LSSPKGALLGLASYDSDDDDDADTDSTDKMP	X;X;Phospho (STY);X;X;X;X;X;X;X;X;X;X;X;X;Phospho (STY);X;X;X;X;X;X;X;X;X;X;X;X;X;Oxidation (M);X	XXXXXPPPPPPPPPPPPPPPPPPPPPPPPPP	GALLGLAS(0.006)Y(0.153)DS(0.835)DDDDDADT(0.005)DSTDKMPISNLSSK	11	4	-1.5447			2416	2416	0.367714	0.333558	0.406565	-0.315166	-0.101215	-0.414135	0.0024148	0.646118	1.56495
B6T6G1	100282351	B6T6G1;A0A3L6FYG1	102;102	B6T6G1	0.00153599	28.685	1	S	KEPERDRKKVKNIKHSGNIGLDDVVEIARTM	X;X;X;X;X;X;X;X;X;X;X;X;X;X;X;Phospho (STY);X;X;X;X;X;X;X;X;X;X;X;X;X;X;X	XXXXXXXXXXXPPPPPPPPPPPPPPPPPPXX	NIKHS(1)GNIGLDDVVEIAR	5	3	-0.41617			6382	6382	0.537306	0.526291	0.660617	-0.284347	-0.197115	-0.345083	0.00015178	0.850252	1.80282
C0PL08	100274244	C0PL08;B4F9K2;A0A3L6FZW5	304;304;304	C0PL08	2.24e-10	63.729	1	S	ERVSERVEDNLEREESYGGGGGGYGGGYDDY	X;X;X;X;X;X;X;X;X;X;X;X;X;X;X;Phospho (STY);X;X;X;X;X;X;X;X;X;X;X;X;X;X;X	XXXXXXPPPPPPPPPPPPPPPPPPPPPPPPP	VEDNLEREES(1)YGGGGGGYGGGYDDYGGNDDYGGDDDY	10	3	1.8942			9532;9533	9533	-0.459775	-0.50017	-0.102308	-0.981614	-1.27115	-1.19224	0.00657707	0.794252	1.73418
B6TAV3	Zm00014a_032343	B6TAV3;A0A3L6G0I9	134;165	B6TAV3	1.77e-28	118.28	1	S	MQEQQLNMLVEMRKYSPESQSVILETLHKEL	X;X;X;X;X;X;X;X;X;X;X;X;X;X;X;Phospho (STY);X;X;X;X;X;X;X;X;X;X;X;X;X;X;X	XXXXXXXXXXXXXPPPPPPPPPPPPPPPPXX	KYS(0.984)PES(0.008)QS(0.009)VILETLHK	3	4	0.24905			5218	5218	0.384866	0.096217	0.461805	-0.739729	-1.18145	-0.907864	0.00178847	1.25731	2.3905
B4FGJ7		B4FGJ7;B6U363;B6TMA1;A0A3L6G6D3	25;152;155;155	B4FGJ7	1.47e-08	82.217	1	S	PKQTSLKKTSQPKAESPLGSFLSSLGLEKYS	X;X;X;X;X;X;X;X;X;X;X;X;X;X;X;Phospho (STY);X;X;X;X;X;X;X;X;X;X;X;X;X;X;X	XXXXXXXXXXXXXPPPPPPPPPPPPPPPPXX	AES(0.999)PLGS(0.001)FLSSLGLEK	3	3	0.60647			270;271	270	0.77668	0.610701	0.906841	-0.6303	-0.948836	-0.930168	0.00028228	1.60118	3.0339
B6TCP6	ZEAMMB73_Zm00001d023692	B6TCP6;K7TN39;C0PNK2;B6TEF3;A0A3L6G6P6	7;7;7;7;7	B6TCP6	0.00200036	39.589	2	S	_________MPPKRKSPATIAPAAGSPRKTR	X;X;X;X;X;X;X;X;X;X;X;X;X;X;X;Phospho (STY);X;X;X;X;X;X;X;X;X;Phospho (STY);X;X;X;X;X	XXXXXXXXXXXXXPPPPPPPPPPPPPPPXXX	RKS(0.999)PAT(0.011)IAPAAGS(0.99)PR	3	3	-0.033029			7055	7055	0.144033	0.29566	0.226574	-0.464126	-0.510826	-0.565741	0.000153398	0.735653	1.66515
B6TCP6	ZEAMMB73_Zm00001d023692	B6TCP6;K7TN39;C0PNK2;B6TEF3;A0A3L6G6P6	17;17;17;17;17	B6TCP6	1.18e-09	86.314	1;2	S	PPKRKSPATIAPAAGSPRKTRIMAAAAAAGK	X;X;X;X;X;Phospho (STY);X;X;X;X;X;X;X;X;X;Phospho (STY);X;X;X;X;X;X;X;X;X;X;X;X;X;X;X	XXXPPPPPPPPPPPPPPPXXXXXXXXXXXXX	KSPATIAPAAGS(1)PR	12	3	0.19168			5108;5109;7055;8155	5109	1.859	1.95444	1.91731	1.15714	1.21344	1.11815	4.45918e-05	0.747339	1.67869
B6THZ1	100192811	B6THZ1;B4FCQ7;A0A3L6GAG4	177;177;177	B6THZ1	0.000363886	50.216	1	S	GAAQGDKVQPLSTAQSPGAAARKRLDTVNGA	X;X;X;X;X;X;X;X;X;X;X;X;X;X;X;Phospho (STY);X;X;X;X;X;X;X;X;X;X;X;X;X;X;X	XXXXXXXPPPPPPPPPPPPPPPXXXXXXXXX	VQPLS(0.061)T(0.031)AQS(0.908)PGAAAR	9	2	-0.45484			9874	9874	-0.72614	-0.900716	-0.622862	-1.45489	-1.54975	-1.52423	0.000902163	0.759719	1.69316
A0A3L6GDD1	Zm00014a_002636	A0A3L6GDD1;K7TMH1	121;125	A0A3L6GDD1	4.81e-23	114.54	1	S	PERQQQQRAPQPYHRSAPVAVPAWPKAMQPV	X;X;X;X;X;X;X;X;X;X;X;X;X;X;X;Phospho (STY);X;X;X;X;X;X;X;X;X;X;X;X;X;X;X	XXXXXXXXXXXXXXXPPPPPPPPPPPXXXXX	S(1)APVAVPAWPK	1	2	-1.037			7466;7467	7467	1.45588	1.41951	1.38688	0.824709	0.727389	0.812085	6.48659e-05	0.632694	1.55046
A0A3L6GDF3	CPK12	A0A3L6GDF3	66	A0A3L6GDF3	0.000142465	34.066	1	S	DRRPSYRPPRLPVFPSGPGPTGRRRPPTGQT	X;X;X;X;X;X;X;X;X;X;X;X;X;X;X;Phospho (STY);X;X;X;X;X;X;X;X;X;X;X;X;X;X;X	XXXXXXXXXXPPPPPPPPPPPPPXXXXXXXX	LPVFPS(1)GPGPTGR	6	2	0.21881			5771	5771	0.979917	1.04691	1.01621	-0.100102	-0.0198894	-0.100444	5.08536e-06	1.08782	2.12553
B4F7Y2	100191191	B4F7Y2	128	B4F7Y2	1.54e-133	188.29	1	S	DVEDAVRAALQEDVESDDEDLDDEDLDDGAE	X;X;X;X;X;X;X;X;X;X;X;X;X;X;X;Phospho (STY);X;X;X;X;X;X;X;X;X;X;X;X;X;X;X	XXXXXXXPPPPPPPPPPPPPPPPPPPPPPPP	AALQEDVES(1)DDEDLDDEDLDDGAEHEVEDAPAELAVK	9	4	-1.9654			105	105	2.31957	2.22905	2.27117	1.4245	1.46596	1.39645	1.39283e-05	0.844295	1.79539
B4F9F9	100191606	B4F9F9;A0A317YD18;A0A1D6LC62;A0A1D6LC61	174;174;174;174	B4F9F9	9.47e-07	81.353	1	S	PAPPAEDLNGKHEPKSPKAAPRSPKAATHPT	X;X;X;X;X;X;X;X;X;X;X;X;X;X;X;Phospho (STY);X;X;X;X;X;X;Phospho (STY);X;X;X;X;X;X;X;X	PPPPPPPPPPPPPPPPPPXXXXXXXXXXXXX	LPDVPAPPAEDLNGKHEPKS(1)PK	20	5	0.22817			3816;3817;3818;5720;5721;5722;5723	5723	2.96633	2.92708	2.95667	2.19708	1.58521	2.23664	0.011087	0.943717	1.92348
B4FAY8		B4FAY8;B6UD88;B6T3V2;A0A3L6FE65;A0A1D6MEQ6;B6SN23;B4FUX8;A0A1D6KF14;A0A317Y134	71;64;64;64;64;71;71;50;114	B4FAY8	1.94e-102	180.39	1	S	KTPLISKDHERAYFDSADWALGKQGGVPNKP	X;X;X;X;X;X;X;X;X;X;X;X;X;X;X;Phospho (STY);X;X;X;X;X;X;X;X;X;X;X;X;X;X;X	XXXXXXXXXXXPPPPPPPPPPPPXXXXXXXX	AYFDS(1)ADWALGK	5	2	-2.8221			1267;1268;1269	1268	3.98478	4.05711	4.33715	3.3285	3.19926	3.32868	0.0019086	0.840865	1.79112
B4FBF9	100192465	B4FBF9;A0A3L6FLJ2;B6STJ4	90;88;88	B4FBF9	0.00326144	73.266	1	S	PAQPQPTRLSSRPSPSPSRAQPLSPIREPNA;PAQPQPTRLSSRPSPSPSRVPPLSPIREPNA	X;X;X;X;X;X;X;X;X;X;X;X;X;X;X;Phospho (STY);X;X;X;X;X;X;X;Phospho (STY);X;X;X;X;X;X;X	XXXXXXXXPPPPPPPPPPPXXXXXXXXXXXX	LSS(0.001)RPS(0.013)PS(0.961)PS(0.025)R	8	2	1.0037			5932	5932	0.114746	0.0583407	0.0333696	-0.982348	-1.29008	-0.831763	0.00128991	1.10355	2.14883
B4FEN1	100193335	B4FEN1	197	B4FEN1	7.92e-37	121.44	1	S	IISKKPLSSEESGLGSGNLREGQSIQVSATN	X;X;X;X;X;X;X;X;X;X;X;X;X;X;X;Phospho (STY);X;X;X;X;X;X;X;X;X;X;X;X;X;X;X	XXXXPPPPPPPPPPPPPPPPXXXXXXXXXXX	KPLSSEES(0.002)GLGS(0.998)GNLR	12	3	0.49997			5005	5005	0.942775	0.992128	1.10258	0.193806	-0.119573	0.128833	0.000893001	0.944805	1.92493
B4FFG9		B4FFG9	75	B4FFG9	0.000424701	18.256	1	S	AIHRMKVLNKLRHLLSIKRTTSQDEELELLF	X;X;X;X;X;X;X;X;X;X;X;X;X;X;X;Phospho (STY);X;X;X;X;X;X;X;X;X;X;X;X;X;X;X	XXXXXXXXXXXXPPPPPPPXXXXXXXXXXXX	HLLS(1)IKR	4	3	-0.098343			3924	3924	0.309103	0.231339	0.538136	-0.465704	-0.589256	-0.560848	0.000830319	0.898129	1.86365
B4FFP8	100193618	B4FFP8	13	B4FFP8	1.54e-07	68.018	1	S	___MDDDLKHLRVSFSGVRQGGETVPLPSQR	X;X;X;X;X;X;X;X;X;X;X;X;X;X;X;Phospho (STY);X;X;X;X;X;X;X;X;X;X;X;X;X;X;X	XXXXXXXXXXXXPPPPPPPXXXXXXXXXXXX	VSFS(1)GVR	4	2	0.24842			9911	9911	1.55865	1.53353	1.5773	0.754968	0.729105	0.854279	4.22401e-05	0.777043	1.71362
B8A0K2	100383398	B8A0K2;B4FII5;B6SL12;A0A3L6EZ91	226;229;435;462	B8A0K2	0.000253781	52.204	1	S	LEMVDLSPRGLSSTPSPSRRLPPPCFSPTKV	X;X;X;X;X;X;X;X;X;X;X;X;X;X;X;Phospho (STY);X;X;X;X;X;X;X;X;X;X;Phospho (STY);X;X;X;X	XXXXXXXXXPPPPPPPPPPXXXXXXXXXXXX	GLSST(0.003)PS(0.992)PS(0.004)R	7	2	-0.10112			3463	3463	-0.805501	-0.940295	-0.892673	-1.56949	-1.75787	-1.7365	0.000347606	0.808462	1.75134
B6T623		B6T623;B4FK60	185;185	B6T623	0.00667737	8.7355	2	S	PTPGKYCGRRGGSQRSPSPYRPRRRERSRSR	X;X;X;X;X;X;X;X;X;X;X;X;X;X;X;Phospho (STY);X;Phospho (STY);X;X;X;X;X;X;X;X;X;X;X;X;X	XXXXXXXXXXPPPPPPPPPPPPPXXXXXXXX	S(0.999)PS(0.997)PY(0.003)RPR	1	2	0.78471			3330;8213	8213	0.228574	0.0378863	0.124267	-0.423961	-0.826818	-0.486796	0.00656916	0.709434	1.63516
B6T623		B6T623;B4FK60	187;187	B6T623	0.00667737	8.7355	2	S	PGKYCGRRGGSQRSPSPYRPRRRERSRSRER	X;X;X;X;X;X;X;X;X;X;X;X;X;Phospho (STY);X;Phospho (STY);X;X;X;X;X;X;X;X;X;X;X;X;X;X;X	XXXXXXXXPPPPPPPPPPPPPXXXXXXXXXX	S(0.999)PS(0.997)PY(0.003)RPR	3	2	0.78471			3330;8213	8213	0.228574	0.0378863	0.124267	-0.423961	-0.826818	-0.486796	0.00656916	0.709434	1.63516
B6T623		B6T623;B4FK60	273;273	B6T623	0.000364806	32.28	1	S	DRRREASRSRDRRGSSPHGRRHRDRSRSPTS	X;X;X;X;X;X;X;X;X;X;X;X;X;X;X;Phospho (STY);X;X;X;X;X;X;X;X;X;X;X;X;X;X;X	XXXXXXXXXXXXPPPPPPPPXXXXXXXXXXX	RGS(0.098)S(0.902)PHGR	4	3	-0.24358			7008	7008	-1.32059	-1.33447	-1.18919	-2.11195	-1.96428	-1.66884	0.0101581	0.633607	1.55144
B6T623		B6T623;B4FK60;A0A3L6F7V8;A0A3L6F7D4;A0A1D6Q0L8	13;13;13;46;41	B6T623	6.55e-06	66.641	2	S	___MSQAKEVRYTARSITPPADRNGTSRSPP	X;X;X;X;X;X;X;X;X;X;X;X;X;X;X;Phospho (STY);X;Phospho (STY);X;X;X;X;X;X;X;X;X;X;X;X;X	XXXXXXXXXXXPPPPPPPPPPPPXXXXXXXX	Y(0.001)T(0.01)ARS(0.99)IT(1)PPADR	5	3	0.44258			10398;10399;10400;10401;10402;10403	10401	2.55539	2.49995	2.36919	1.71741	1.68493	1.74797	0.00019944	0.758072	1.69123
B4FQ73		B4FQ73;B6TB81;B4FZ47;A0A3L6F7Z1;A0A1D6PN12;B4FG95	21;21;21;34;37;21	B4FQ73	0.0162685	26.6	1	S	PAYSPPRRGHGGRGRSPPPRRGYGGGRGDHG	X;X;X;Phospho (STY);X;X;X;X;X;X;X;X;X;X;X;Phospho (STY);X;X;X;X;X;X;X;X;X;X;X;X;X;X;X	XXXXXXXXXXXXXPPPPPPPXXXXXXXXXXX	GRS(1)PPPR	3	3	-0.12482			3589;3590	3589	-0.267182	-0.459588	-0.311263	-1.15172	-1.03284	-0.943076	0.00114921	0.696534	1.62061
B4FQ73		B4FQ73;B6TB81;A0A3L6F7Z1;A0A1D6PN12;C4J343	168;170;186;189;72	B4FQ73	0.000362456	40.37	3	S	SRSRSPRPRGRGRSQSYSPAPKRRDDYSASP	X;X;X;X;X;X;X;X;X;X;X;X;X;Phospho (STY);X;Phospho (STY);Phospho (STY);Phospho (STY);X;X;X;X;X;X;X;X;Phospho (STY);X;X;Phospho (STY);X	XXXXXXXXXXXPPPPPPPPPPPXXXXXXXXX	GRS(0.948)QS(0.965)Y(0.102)S(0.986)PAPK	5	2	-0.33015			3591;3592;3593;3594;3595;3599;3600;3603	3594	2.55589	2.48836	2.44504	2.01205	1.64482	2.0093	0.00853909	0.607708	1.52384
B4FQ73		B4FQ73;B6TB81;B4FZ47;A0A3L6F7Z1;A0A1D6PN12;B4FG95	5;5;5;18;21;5	B4FQ73	3.09e-07	90.069	2	S	___________MGRYSPAYSPPRRGHGGRGR	X;X;X;X;X;X;X;X;X;X;X;X;X;X;X;Phospho (STY);X;X;X;Phospho (STY);X;X;X;X;X;X;X;X;X;X;X	XXXXXXXXXXXXPPPPPPPPPPPPXXXXXXX	GRY(0.001)S(0.999)PAY(0.166)S(0.833)PPR	4	2	-0.44866			3606;3607;3608;3609;3610;3611;3612;3613;3614;10386;10387;10388;10389	3607	3.65466	3.56792	3.57445	3.00038	2.64152	2.98697	0.00391364	0.72272	1.65029
B4FQ73		B4FQ73;B6TB81;B4FZ47;A0A3L6F7Z1;A0A1D6PN12;B4FG95	9;9;9;22;25;9	B4FQ73	3.09e-07	90.069	1;2	S	_______MGRYSPAYSPPRRGHGGRGRSPPP	X;X;X;X;X;X;X;X;X;X;X;Phospho (STY);X;X;X;Phospho (STY);X;X;X;X;X;X;X;X;X;X;X;Phospho (STY);X;X;X	XXXXXXXXPPPPPPPPPPPPXXXXXXXXXXX	YSPAYS(1)PPR	6	2	-0.82139			3606;3607;3608;3609;3610;3611;3612;3613;3614;10385;10386;10387;10388;10389	10385	3.80583	3.7207	3.73866	3.19429	2.85205	3.17612	0.00396714	0.680916	1.60316
C0PGC2	ZEAMMB73_Zm00001d042807	C0PGC2;B6SKP3;C4J8U7;A0A1D6N6W4;A0A3L6FL87	333;335;213;222;224	C0PGC2	0.0370614	42.333	1	S	PHGWGASDPRAYAGRSPPERAGRFTDPSTKG	X;X;X;X;X;X;Phospho (STY);X;X;X;X;X;X;X;X;Phospho (STY);X;X;X;X;X;X;X;X;X;X;X;X;X;X;X	XXXXXXXXXXPPPPPPPPPPXXXXXXXXXXX	AYAGRS(1)PPER	6	2	0.42476			1264	1264	-1.46311	-1.48565	-1.54422	-2.20679	-2.11803	-2.10019	9.48499e-05	0.644012	1.56267
B6SR00		B6SR00;B6TVW0	15;15	B6SR00	0.000627565	40.196	1	S	_MAEGNSSSGGDLFSSGKLVAGAAVSVFQQK	X;X;X;X;X;X;X;X;X;X;X;X;X;X;X;Phospho (STY);X;X;X;X;X;X;X;X;X;X;X;X;X;X;X	XXPPPPPPPPPPPPPPPPXXXXXXXXXXXXX	AEGNSSSGGDLFS(0.125)S(0.874)GK	14	2	0.21901			248	248	-0.86925	-1.02493	-1.04438	-1.68338	-1.81531	-1.61431	0.000859358	0.724816	1.65269
B6STJ4		B6STJ4	96	B6STJ4	9.87e-05	65.338	1;2	S	LSSRPSPSPSRAQPLSPIREPNASPAPVAKE	X;X;X;X;X;X;X;Phospho (STY);X;Phospho (STY);X;X;X;X;X;Phospho (STY);X;X;X;X;X;X;X;Phospho (STY);X;X;X;X;X;X;X	XXXXXXXXXXXPPPPPPPPPPPPPPPPPPPX	AQPLS(1)PIREPNAS(1)PAPVAK	5	3	-1.8813			805;806;807;808;809;810	810	1.89962	1.96215	1.97322	0.79683	0.939342	0.581041	0.000388774	1.17259	2.25416
B6T3Q7		B6T3Q7	244	B6T3Q7	1.28e-38	117.03	1	S	FRWAIDNNKWLARVNSIRPLFEEAGIDLGKS	X;X;X;X;X;X;X;X;X;X;X;X;X;X;X;Phospho (STY);X;X;X;X;X;X;X;X;X;X;X;X;X;X;X	XXXXXXXXXXXXXPPPPPPPPPPPPPPPPPX	VNS(1)IRPLFEEAGIDLGK	3	3	-0.043035			9813	9813	1.40675	1.33511	1.21601	-1.00523	-1.29525	-1.51785	8.18137e-05	2.59207	6.02962
B6T4Q5		B6T4Q5	212	B6T4Q5	4.12e-11	95.259	1	S	GSGFGRKPQVEESYGSGYGRTPQVEESYGSG	X;Phospho (STY);X;X;X;X;X;X;X;X;X;X;X;X;X;Phospho (STY);X;X;X;X;X;X;X;X;X;X;X;X;X;Phospho (STY);X	XXXXXXPPPPPPPPPPPPPPXXXXXXXXXXX	KPQVEESYGS(1)GYGR	10	3	-0.37178			5015	5015	0.649925	0.679628	0.637728	-1.72775	-1.49946	-1.78316	1.20159e-05	2.32588	5.01373
B6TLZ2		B6TLZ2	107	B6TLZ2	9.87e-96	174.05	1	S	AAHAPVPEFEPIDTGSDLENDDLKSALGKKR	X;X;X;X;X;X;X;X;X;X;X;X;X;X;X;Phospho (STY);X;X;X;X;X;X;X;X;X;X;X;X;X;X;X	PPPPPPPPPPPPPPPPPPPPPPPPXXXXXXX	LVQSAALQAPDVAAAHAPVPEFEPIDT(0.025)GS(0.975)DLENDDLK	29	4	2.2166			6044;6045	6045	1.91648	1.95064	1.90872	1.11961	1.09458	1.1546	3.16633e-06	0.802351	1.74394
B6TUJ8	100284518	B6TUJ8;A0A3L6E8P5	211;212	B6TUJ8	0.000173688	55.33	1	S	AKGREDLKKFYRKVDSNVLNKIPRGPVKTKA	X;X;X;X;X;X;X;X;X;X;X;X;X;X;X;Phospho (STY);X;X;X;X;X;X;X;X;X;X;X;X;X;X;X	XXXXXXXXXXXXPPPPPPPPPXXXXXXXXXX	KVDS(1)NVLNK	4	2	-0.36251			5152;5153	5153	1.47532	1.30201	1.08875	-0.00832977	-0.243159	-0.128179	0.000413185	1.41525	2.66706
B6TUJ8	100284518	B6TUJ8;A0A3L6E8P5	43;44	B6TUJ8	0.000128998	79.125	1	S	RRMRTPVKLLGGRKVSDVLLWRNRNLSAGIL	X;X;X;X;X;X;X;X;X;X;X;X;X;X;X;Phospho (STY);X;X;X;X;X;X;X;X;X;X;X;X;X;X;X	XXXXXXXXXXXXXPPPPPPPPPXXXXXXXXX	KVS(1)DVLLWR	3	2	2.2738			5172;5173	5173	1.57309	1.55038	1.56164	0.840915	0.807791	0.789048	1.41426e-06	0.749116	1.68076
B6TVK1	ZEAMMB73_Zm00001d037181	B6TVK1;A0A1D6LVE6;A0A3L6EA34	244;127;236	B6TVK1	7.14e-12	81.225	1	S	GAGAMWSPRRRSRVGSGVDFDPFTAALLEAT	X;X;X;X;X;X;X;X;X;X;X;X;X;X;X;Phospho (STY);X;X;X;X;X;X;X;X;X;X;X;X;X;X;X	XXXXXXXXXXXXXPPPPPPPPPPPPPPPPPP	VGS(1)GVDFDPFTAALLEATK	3	3	0.27965			9666;9667	9666	0.218188	0.244709	0.305262	-0.495454	-0.447282	-0.456395	1.69548e-05	0.72243	1.64996
B6TZV5	ZEAMMB73_Zm00001d024471	B6TZV5	40	B6TZV5	1.74e-05	64.371	1	S	AGATHKDAAGATEAKSSVGSQPVEIRSRGGA	X;X;X;X;X;X;X;X;X;X;X;X;X;X;X;Phospho (STY);X;X;X;X;X;X;X;X;X;X;X;X;X;X;X	XXXXXXPPPPPPPPPPPPPPPPPPPPXXXXX	DAAGAT(0.045)EAKS(0.908)S(0.04)VGS(0.007)QPVEIR	10	3	-0.61356			1292	1292	0.160252	-0.272257	-0.291902	-0.929296	-0.776779	-0.776351	0.0113449	0.692839	1.61646
B6U588	100278204	B6U588	80	B6U588	0.00134135	34.512	2	S	AVAETEGSLLHRRNLSLEELAGEVGFSPDRR	X;X;X;X;X;X;X;X;X;X;X;X;X;X;X;Phospho (STY);X;X;X;X;X;X;X;X;X;X;Phospho (STY);X;X;X;X	XXXXXXXXXXXXXPPPPPPPPPPPPPPPPPP	NLS(1)LEELAGEVGFS(1)PDRR	3	3	-1.3436			6430	6430	-0.391999	-0.308465	-0.326329	-0.911069	-1.10025	-0.991709	0.000401494	0.658745	1.57871
B6U588	100278204	B6U588	91	B6U588	0.00134135	34.512	2	S	RRNLSLEELAGEVGFSPDRRLRVPLPKARSV	X;X;X;X;Phospho (STY);X;X;X;X;X;X;X;X;X;X;Phospho (STY);X;X;X;X;X;X;X;X;X;X;X;X;X;X;X	XXPPPPPPPPPPPPPPPPPPXXXXXXXXXXX	NLS(1)LEELAGEVGFS(1)PDRR	14	3	-1.3436			6430	6430	-0.391999	-0.308465	-0.326329	-0.911069	-1.10025	-0.991709	0.000401494	0.658745	1.57871
B6U753		B6U753	260	B6U753	5.2e-18	99.856	1	S	SVFIEEGKVYKDVVGSAYYVAPEVLRRNYGR	X;X;X;X;X;X;X;X;X;X;X;X;X;X;X;Phospho (STY);X;X;X;X;X;X;X;X;X;X;X;X;X;X;X	XXXXXXXXPPPPPPPPPPPPPPPPPPXXXXX	VYKDVVGS(1)AYYVAPEVLR	8	3	-1.94			10124	10124	1.68746	1.73471	1.58104	0.306509	0.783918	0.208416	0.00253917	1.23479	2.35347
B7ZY51	100279440	B7ZY51;A0A3L6DIL6	396;398	B7ZY51	0.000122452	53.241	1	S	AIVDPTNRAVYYNDRSPPADLKRDMPVGTEA	X;X;X;X;X;X;X;X;X;X;X;X;X;X;X;Phospho (STY);X;X;X;X;X;X;X;X;X;X;X;X;X;X;X	XXXXXXXXPPPPPPPPPPPPPPXXXXXXXXX	AVYY(0.004)NDRS(0.996)PPADLK	8	3	0.0043157			1251;1252	1252	0.71662	0.874895	0.936022	0.283869	-0.242822	0.199455	0.012316	0.762345	1.69625
B7ZY51	100279440	B7ZY51;A0A1D6FE19;A0A3L6DIL6	363;363;365	B7ZY51	0.000947809	34.403	1	S	SPSEASSRVFSDDDKSDHGGGGRKAQLLKQE	X;X;X;X;X;X;X;X;X;X;X;X;X;X;X;Phospho (STY);X;X;X;X;X;X;X;X;X;X;X;X;X;X;X	XXXXXXXXPPPPPPPPPPPPPPPXXXXXXXX	VFS(0.003)DDDKS(0.997)DHGGGGR	8	3	0.94518			9627	9627	1.28573	0.942532	1.08369	0.668887	-0.0804309	0.564579	0.0475199	0.719638	1.64677
C0PJF1	100383840	C0PJF1;A0A317Y093	212;212	C0PJF1	0.0123437	35	1	S	SPSPPQPPRTYPKPPSRRPPSQPPPSRRSPS	X;X;X;X;X;X;X;X;X;X;X;X;X;X;X;Phospho (STY);X;X;X;X;X;X;X;X;X;X;X;X;X;X;X	XXXXXXXXXPPPPPPPPXXXXXXXXXXXXXX	TYPKPPS(1)R	7	3	0.4196			9420	9420	1.35277	1.50425	1.24235	0.547322	0.346236	0.603695	0.00134821	0.867373	1.82434
C0PJF1	100383840	C0PJF1;A0A317Y093	293;293	C0PJF1	0.000742378	55.782	1	S	RRSPSPPQPPRTYPKSPSRRPPSPQPPPRRS	X;X;X;X;X;X;X;X;X;X;X;X;X;X;X;Phospho (STY);X;X;X;X;X;X;X;X;X;X;X;X;X;X;X	XXXXXXXXXXXPPPPPPPPXXXXXXXXXXXX	TYPKS(0.996)PS(0.004)R	5	3	1.6101			9421	9421	2.00967	2.05171	1.94054	-0.424345	-0.420979	-0.495493	4.49249e-07	2.44758	5.455
Q41825	ZEAMMB73_Zm00001d012561	Q41825;B8A1B5;Q30KW0;P93627;A0A3L6DNX8	133;43;133;133;133	Q41825	5.97e-38	149.09	1	S	KFKELQEFKPVEEGASA______________	X;X;X;X;X;X;X;X;X;X;X;X;X;X;X;Phospho (STY);X;X;X;X;X;X;X;X;X;X;X;X;X;X;X	XPPPPPPPPPPPPPPPPXXXXXXXXXXXXXX	FKELQEFKPVEEGAS(1)A	15	4	-0.30864			1900;1901;1902;2228;2229	2229	4.9567	4.62545	4.79822	1.35938	1.44549	1.27175	5.82853e-06	3.43458	10.8121
B8A0E1	GTL1	B8A0E1;A0A3L6FSC2;A0A1D6E4F1	476;474;476	B8A0E1	0.00467527	34.007	1	T	PPQQQPKDTSQQDAGTPRSLPPASSQSLELV	X;X;X;X;X;X;X;X;X;X;X;X;X;X;X;Phospho (STY);X;X;X;X;X;X;X;X;X;X;X;X;X;X;X	XXXXXXXPPPPPPPPPPPXXXXXXXXXXXXX	DT(0.001)S(0.003)QQDAGT(0.996)PR	9	2	0.7495			1593	1593	-2.53463	-3.0742	-2.67769	-4.17852	-5.07317	-5.23433	0.0048411	2.0665	4.18869
B6ST12	ZEAMMB73_Zm00001d003833	B6ST12;A0A1D6EBU3;B6TRQ3;A0A3L6FUS2	51;51;55;55	B6ST12	3.99e-09	73.223	1	T	GTEQRHHQPQKQRPKTLPDLLAGVRGASFRS	X;X;X;X;X;X;X;X;X;X;X;X;X;X;X;Phospho (STY);X;X;X;X;X;X;X;X;X;X;X;X;X;X;X	XXXXXXXXXXXPPPPPPPPPPPPPPXXXXXX	T(1)LPDLLAGVR	1	2	-0.013614			6829;6830;9173	9173	1.63775	1.65121	1.69671	0.725159	0.958481	0.752927	0.000359063	0.849703	1.80213
A0A1D6EXQ5	100383319	A0A1D6EXQ5;C0PF30;A0A3L6FPB1;A0A1D6EXR0;A0A1D6EXQ0;A0A1D6EXS3	287;356;356;359;425;30	A0A1D6EXQ5	0.000724888	50.257	1	T	LKERGVDVLASDLEKTSPVGRPKGEFAKVEQ	X;X;X;X;X;X;X;X;X;X;X;X;X;X;X;Phospho (STY);X;X;X;X;X;X;X;X;X;X;X;X;X;X;X	XXXXXXXXXXXXXXXPPPPPPPPXXXXXXXX	T(0.904)S(0.096)PVGRPK	1	3	0.65952			9317	9317	1.25094	1.05225	1.17948	-0.199784	-1.10911	-0.333492	0.00411884	1.70835	3.26787
A0A1D6EXQ5	100383319	A0A1D6EXQ5;C0PF30;A0A3L6FPB1;A0A1D6EXR0;A0A1D6EXQ0;A0A1D6EXS3;A0A1D6EXQ6;A0A1D6EXQ3;A0A1D6EXS2	386;455;455;458;524;129;421;477;173	A0A1D6EXQ5	0.00463541	28.614	1	T	ETWRKPVEPPKLEVATPRFGKAATALELAQA	X;X;X;X;X;X;X;X;X;X;X;X;X;X;X;Phospho (STY);X;X;X;X;X;X;X;X;X;X;X;X;X;X;X	XXXXPPPPPPPPPPPPPPXXXXXXXXXXXXX	KPVEPPKLEVAT(1)PR	12	4	0.81218			5035;5036	5036	-0.239422	-0.185237	-0.061374	-1.84844	-1.80261	-1.65858	3.23372e-05	1.60786	3.048
A0A3L6G5F9	Zm00014a_037857	A0A3L6G5F9;A0A1D6EYB3	286;286	A0A3L6G5F9	0.00448821	35.866	1	T	PAAVAPPVGTMRKAETFNDGGAGRSRPAPAA	X;X;X;X;X;X;X;X;X;X;X;X;X;X;X;Phospho (STY);X;X;X;X;X;X;X;X;X;X;X;X;X;X;X	XXXXXXXXXXXXPPPPPPPPPPPPXXXXXXX	KAET(1)FNDGGAGR	4	3	-0.14771			4496	4496	-0.156549	-0.250156	-0.304459	-1.5216	-1.24431	-1.2616	0.000374104	1.10545	2.15166
A0A1D6F2P9	100279429	A0A1D6F2P9;A0A1D6F2M3;A0A1D6F2N8;A0A1D6F2N0;B7ZY38;A0A1D6F2M9;A0A1D6F2M5;A0A1D6F2N6;A0A1D6F2N4;A0A1D6F2M6;A0A1D6F2M8;A0A3L6FYQ2	114;336;423;458;468;565;632;679;679;680;719;759	A0A1D6F2P9	1.02e-25	109.97	1	T	DGKVPFFADDEESPATPKADAFFIPRENPRN	X;X;X;X;X;X;X;X;X;X;X;X;X;X;X;Phospho (STY);X;X;X;X;X;X;X;X;X;X;X;X;X;X;X	PPPPPPPPPPPPPPPPPPPPPPPPPPXXXXX	VPFFADDEES(0.006)PAT(0.994)PK	13	2	-0.32472			5217;9831;9832;9834	9832	3.15113	3.12258	3.26762	2.41113	2.16022	2.49098	0.0016279	0.826333	1.77317
A0A1D6F8B5	100282831	A0A1D6F8B5;A0A1D6F8B6;B6TBU1;A0A1P8SET2;A0A1D6F8B8	123;154;346;346;350	A0A1D6F8B5	4.67e-06	64.888	1	T	GPIPDPSKPPLYRSVTFPDFIAKFNSIGLDG	X;X;X;X;X;X;X;X;X;X;X;X;X;X;X;Phospho (STY);X;X;X;X;X;X;X;X;X;X;X;X;X;X;X	XXXXXXXXXXXXXPPPPPPPPPPXXXXXXXX	S(0.007)VT(0.993)FPDFIAK	3	2	0.29803			8720	8720	0.497966	0.376651	0.461164	-0.167807	-0.252185	-0.341372	0.000344878	0.699048	1.62343
A0A1D6FNZ5	ZEAMMB73_Zm00001d010055	A0A1D6FNZ5;B4G0F8	60;122	A0A1D6FNZ5	0.00341879	37.289	1	T	RQFSPHLAAKLRPPITPVLRGRPSSKRSIHI	X;X;X;X;X;X;X;X;X;X;X;X;X;X;X;Phospho (STY);X;X;X;X;X;X;X;X;X;X;X;X;X;X;X	XXXXXXXXXXPPPPPPPPPPXXXXXXXXXXX	LRPPIT(1)PVLR	6	3	0.01888			5830	5830	-2.07811	-1.7986	-2.14746	-2.63775	-2.45476	-2.79976	0.0129842	0.622699	1.53975
Q8LK06	mbd109	Q8LK06;C0PA71;A0A3L6ELM0;A0A1D6GLD8;Q5I204;A0A1D6KWW9;A0A317Y116	113;113;113;123;107;216;79	Q8LK06	0.00125448	19.118	1	T	LSEKVKATESPEGEKTPKRARSSSKRGKKEE;LSEKVKATESPEGEKTPKRGRSSSKRGKKEE	X;X;X;X;X;X;X;X;X;X;X;X;X;X;X;Phospho (STY);X;X;X;X;X;X;X;X;X;X;X;X;X;X;X	XXXXPPPPPPPPPPPPPPXXXXXXXXXXXXX	AT(0.001)ES(0.001)PEGEKT(0.998)PK	10	3	0.23249			1020;1021;9729	1020	1.47508	1.51837	1.39012	0.146821	0.839374	0.176603	0.00941459	1.07359	2.10466
A0A1D6HMV4	103627843	A0A1D6HMV4;A0A1D6HMV3;A0A1D6HMV0;A0A1D6HMV2;A0A1D6HMV1;A0A3L6EUP5	126;126;126;126;126;133	A0A1D6HMV4	0.0220672	28.506	2	T	PLLSDKADGKQDSVKTLPKTLGSIRDERVSF	X;X;X;X;X;X;X;X;X;X;X;X;Phospho (STY);X;X;Phospho (STY);X;X;X;X;X;X;X;X;X;X;X;X;X;X;X	XXXXXXPPPPPPPPPPPPPXXXXXXXXXXXX	ADGKQDS(1)VKT(1)LPK	10	4	-0.58801			198	198	-0.178202	-0.103423	-0.0319381	-0.604736	-0.830351	-0.655603	0.00180139	0.592376	1.50773
A0A1D6IE72	ZEAMMB73_Zm00001d021710	A0A1D6IE72;A0A1D6IE79;A0A3L6E3Z6;A0A1D6IE73;B4FXD6	440;457;495;495;170	A0A1D6IE72	7.42e-09	78.891	1	T	ETWRKPVEPPKPEVATPRFGKAATALELAQA	X;X;X;X;X;X;X;X;X;X;X;X;X;X;X;Phospho (STY);X;X;X;X;X;X;X;X;X;X;X;X;X;X;X	XXXXPPPPPPPPPPPPPPXXXXXXXXXXXXX	KPVEPPKPEVAT(1)PR	12	4	0.23364			5037;5038;5039;5040	5039	2.72136	2.6709	2.88889	1.44438	1.51683	1.36808	7.44517e-05	1.31729	2.49197
A0A1D6J8A6	100283603	A0A1D6J8A6;A0A1D6J8A1;A0A1D6J895;A0A1D6J899;A0A1D6J8A2;A0A1D6J893;B6TJV2;A0A3L6GCT5;A0A1D6J894	154;154;249;258;218;249;249;249;249	A0A1D6J8A6	0.019586	40.115	1	T	GSSRPQSFITRGAPDTPRSQPYAGKATISVD	X;X;X;X;X;X;X;X;X;X;X;X;X;X;X;Phospho (STY);X;X;X;X;X;X;X;X;X;X;X;X;X;X;X	XXXXXXXXXXXPPPPPPPXXXXXXXXXXXXX	GAPDT(1)PR	5	2	0.49542			2420	2420	-1.70185	-1.66652	-1.6372	-2.4948	-3.23008	-3.00552	0.00472279	1.24161	2.36463
A0A1D6K4L0	103635858	A0A1D6K4L0;A0A1D6K4K9;A0A317Y3Z4;A0A1D6K4K5;A0A317Y409;A0A1D6K4K6;A0A3L6D9J9;A0A1D6P7N9;K7VKP3;A0A1D6P7N7;A0A1D6P7P0;A0A1D6P7N8;C0P2G1	355;672;696;696;710;710;686;655;685;612;664;351;285	A0A3L6D9J9	0.0150975	24.284	1	T	PMADLTPLGRERLPPTPKKPEPPVVTLDDLF;PMADPAAIARERLPPTPKKPEPPVVTLDDLF	X;X;X;X;X;X;X;X;X;X;X;X;X;X;X;Phospho (STY);X;X;X;X;X;X;X;X;X;X;X;X;X;X;X	XXXXXXXXXXPPPPPPPPXXXXXXXXXXXXX	ERLPPT(1)PK	6	3	0.51719			1971;1972	1972	0.47822	0.41824	0.550583	-0.104705	-0.255376	-0.206538	0.000331476	0.671221	1.59242
A0A1D6K4L0	103635858	A0A1D6K4L0;A0A1D6K4K9;A0A317Y3Z4;A0A1D6K4K5;A0A317Y409;A0A1D6K4K6;A0A1D6K4K7;A0A1D6K4K8	166;507;507;507;521;521;507;521	A0A1D6K4L0	4.58e-18	88.714	1;2	T	AKVSGRQALSQTGPETPKESFQPAFKRSFGR	X;X;X;X;X;X;X;X;X;Phospho (STY);X;X;X;X;X;Phospho (STY);X;X;X;X;X;X;X;X;X;X;X;X;X;X;X	XXXXXXPPPPPPPPPPPPPPPPPPPPXXXXX	QALSQT(0.001)GPET(0.999)PKESFQPAFK	10	4	0.062506			6643;6644;6645;6646	6644	3.27564	3.18307	3.26381	2.25852	2.34582	2.29001	1.68473e-05	0.942725	1.92215
A0A3L6DAH4	NNJA6_0	A0A3L6DAH4;B6TNQ7;A0A1Q1CXY5;A0A1D6K5R7;A0A317YFF1	201;203;203;206;208	A0A3L6DAH4	0.00227464	53.745	1	T	TATEQQPRLRTLGSLTTRTGSTSDIRKLMME	X;X;X;X;X;X;X;X;X;X;X;X;X;X;X;Phospho (STY);X;X;X;X;X;X;X;X;X;X;X;X;X;X;X	XXXXXXXXXXPPPPPPPPXXXXXXXXXXXXX	TLGS(0.034)LT(0.965)T(0.001)R	6	2	-0.30485			9151	9151	1.08182	0.628955	0.672352	0.213586	-0.0596952	0.0859776	0.0122129	0.714419	1.64082
A0A1D6LDY0	100273619	A0A1D6LDY0;A0A1D6LDW9;B8A0M3;B4FWM3;A0A3L6EFS1;A0A1D6LDX4	94;100;199;199;199;100	A0A1D6LDY0	1.16e-156	206.43	1	T	EADSNALTRPVELVGTPGSVDKAEQLIKSVI	X;X;X;X;X;X;X;X;X;X;X;X;X;X;X;Phospho (STY);X;X;X;X;X;X;X;X;X;X;X;X;X;X;X	PPPPPPPPPPPPPPPPPPPPPPPPPPPPXXX	DIEADSNALTRPVELVGT(1)PGSVDK	18	4	-0.57682			1375;1376;1377;1378;1379;1380	1376	3.78441	3.80668	3.8917	3.31888	2.9937	3.30933	0.0051504	0.620296	1.53719
A0A1D6N515	100037802	A0A1D6N515;A0A1D6N530;A0A1D6N531;B7ZZX9;B6U297;A0A3L6FBM0;Q9LKL4;A0A3L6FC01;A1XCH8;A0A1D6N521;A0A1D6N518;A0A1D6N534;A0A1D6N517;A0A1D6N523;A0A1D6N535;A0A1D6N524;A0A1D6N536;A0A1D6N519;Q8W0V3;A0A1D6N522	15;15;15;15;15;15;15;15;15;15;15;15;15;15;15;15;15;15;15;15	A0A1D6N515	1.79e-05	66.697	1	T	_MFGNIGKIPIIGDLTGSNKNAHLKGNLVLM	X;X;X;X;X;X;X;X;X;X;X;X;X;X;X;Phospho (STY);X;X;X;X;X;X;X;X;X;X;X;X;X;X;X	XXXXXXXXPPPPPPPPPPPPXXXXXXXXXXX	IPIIGDLT(0.918)GS(0.082)NK	8	2	0.82976			4321	4321	0.154191	0.137991	0.0437421	-0.695364	-0.734158	-0.475896	0.0010312	0.747114	1.67843
Q6WFB1		Q6WFB1;B6TKD1;A0A3L6FDR7;A0A1D6N672	58;64;64;65	Q6WFB1	0.00204029	31.442	1	T	VSVKTLALFGKSKVKTAPAKKAAAPKPKPKV	X;X;X;X;X;X;X;X;X;X;X;X;X;X;X;Phospho (STY);X;X;X;X;X;X;X;X;X;X;X;X;X;X;X	XXXXXXXXXXXXXPPPPPPPXXXXXXXXXXX	VKT(1)APAK	3	3	0.48933			9751;9752	9752	3.23301	3.21191	3.45606	-0.971715	-0.853445	-0.98806	1.15705e-06	4.23807	18.8706
A0A1D6N7Q2	103651042	A0A1D6N7Q2;A0A1D6N7P7	769;772	A0A1D6N7Q2	0.000407421	37.147	1	T	STNGKLNNSTDQGVETPKKDDEKKADSPKES	X;X;X;X;X;X;X;X;X;X;X;X;X;X;X;Phospho (STY);X;X;X;X;X;X;X;X;X;X;X;X;X;X;X	XXXXXPPPPPPPPPPPPPPPPPPXXXXXXXX	LNNS(0.002)T(0.002)DQGVET(0.996)PKKDDEK	11	4	0.56601			5685	5685	0.0560457	-0.0459472	0.1043	-1.99614	-2.07778	-2.01399	2.16971e-06	2.06743	4.19141
C0HIP2	101202711	C0HIP2;A0A1D6NP18;C0PJI0;A0A1D6NP17;A0A1D6NP20;A0A1D6NP30;A0A1D6NP15;A0A3L6FL49;A0A1D6NP19	101;116;238;513;615;664;670;676;694	C0HIP2	1.02e-25	109.97	1	T	DGKVPFFADDEESPATPKADAFFVPRENPRN	X;X;X;X;X;X;X;X;X;X;X;X;X;X;X;Phospho (STY);X;X;X;X;X;X;X;X;X;X;X;X;X;X;X	PPPPPPPPPPPPPPPPPPPPPPPPPPXXXXX	VPFFADDEES(0.006)PAT(0.994)PK	13	2	-0.32472			5217;9831;9832;9836;9837	9832	3.14616	3.16677	3.28328	2.53662	2.21333	2.55721	0.00306426	0.763018	1.69704
B4FAR0	100191939	B4FAR0;A0A1D6P9J0;K7VZB3;B8A0U7	54;61;401;401	B4FAR0	0.0252445	19.906	1	T	GTEDNEYRRLIAIQLTRRKHDIEQDLRVDPD	X;X;X;X;X;X;X;X;X;X;X;X;X;X;X;Phospho (STY);X;X;X;X;X;X;X;X;X;X;X;X;X;X;X	XXXXXXXXXPPPPPPPPXXXXXXXXXXXXXX	LIAIQLT(1)R	7	2	0.21188			5499	5499	-0.604894	-0.527906	-0.50022	-1.19752	-1.20752	-1.04962	0.000532683	0.607216	1.52332
A0A1D6PJD2	103639543	A0A1D6PJD2;A0A1D6PJE0;A0A1D6PJG1;A0A1D6PJF1;A0A1D6PJG0;A0A1D6PJE9;K7VLM3;A0A3L6DC31	189;328;333;484;943;955;960;960	A0A1D6PJD2	5.26e-94	170.09	1	T	RSSFFDDSVPSTPAYTSGFSPKFGESRDDSS	X;X;X;X;X;X;X;X;X;X;X;X;X;X;X;Phospho (STY);X;X;X;X;X;X;X;X;X;X;X;X;X;X;X	XPPPPPPPPPPPPPPPPPPPPPXXXXXXXXX	SSFFDDSVPST(0.025)PAY(0.002)T(0.865)S(0.072)GFS(0.036)PK	15	2	0.18668			8345	8345	1.22197	1.05735	1.10425	0.402894	0.299544	0.46467	0.000423513	0.738822	1.66881
A0A1D6QKX8	ZEAMMB73_Zm00001d052928	A0A1D6QKX8;C4J6F5;B4FRD7;A0A3L6FBA2	130;130;130;127	A0A1D6QKX8	0.00174362	28.75	1	T	GAVAVAAKKAAAAVATPKQAKGAVPIGSETA	X;X;X;X;X;X;X;X;X;X;X;X;X;X;X;Phospho (STY);X;X;X;X;X;X;X;X;X;X;X;X;X;X;X	XXXXXXXXPPPPPPPPPPXXXXXXXXXXXXX	KAAAAVAT(1)PK	8	3	-0.045109			4468	4468	-0.677641	-0.795661	-0.833797	-1.57416	-1.42628	-1.54991	0.000338275	0.74775	1.67917
A0A3L6D9J9	Zm00014a_030512	A0A3L6D9J9;A0A1D6P7N9;K7VKP3;A0A1D6P7N7;A0A1D6P7P0;A0A1D6P7N8;C0P2G1	500;469;499;426;478;165;99	A0A3L6D9J9	4e-54	133.62	1;2	T	AKVPERQALSQTGPETPKDIFQPAFKRSFGR	X;X;X;X;X;X;X;X;X;Phospho (STY);X;Phospho (STY);X;X;X;Phospho (STY);X;X;X;X;X;X;X;X;X;X;X;X;X;X;X	XXXXXXPPPPPPPPPPPPPPPPPPPPXXXXX	QALSQTGPET(1)PKDIFQPAFK	10	4	-0.1809			6637;6638;6641;6642	6637	3.42333	3.3475	3.36109	2.34516	2.28321	2.33022	3.8047e-06	1.05778	2.08172
B4FR76	100272861	B4FR76;A0A3L6DYJ3	210;210	B4FR76	3.44e-16	98.861	1	T	QKLEGYEAVQDEDPATPKLRWEIEQVGYNAS	X;X;X;X;X;X;X;X;X;X;X;X;X;X;X;Phospho (STY);X;X;X;X;X;X;X;X;X;X;X;X;X;X;X	XXPPPPPPPPPPPPPPPPXXXXXXXXXXXXX	LEGYEAVQDEDPAT(1)PK	14	3	-0.49863			5339	5339	0.303584	0.181695	0.152074	-0.805194	-0.353094	-0.739522	0.00470522	0.845055	1.79633
K7UGY0	C3H33	K7UGY0;B7ZYH4;A0A3L6DZC4	350;590;590	K7UGY0	1.3e-08	64.263	1	T	VGSPRNLNASWGNIGTPKSKVDWGVDDDELV	X;X;X;X;X;X;X;X;X;X;X;X;X;X;X;Phospho (STY);X;X;X;X;X;X;X;X;X;X;X;X;X;X;X	XXXXXPPPPPPPPPPPPPXXXXXXXXXXXXX	NLNASWGNIGT(1)PK	11	2	1.8723			6421;6422	6422	-0.667134	-0.664322	-0.772238	-1.51081	-1.21306	-1.66792	0.00523937	0.762696	1.69666
A0A3L6E5Y2	DRP2A_1	A0A3L6E5Y2;B6UEQ3	734;846	A0A3L6E5Y2	3.75e-12	97.724	2	T	VSSYSNDTTEAESPRTPSRSGEDWRSAFDSA	X;X;X;X;X;X;X;X;X;X;X;X;Phospho (STY);X;X;Phospho (STY);X;X;X;X;X;X;X;X;X;X;X;X;X;X;X	PPPPPPPPPPPPPPPPPPPXXXXXXXXXXXX	ASVSS(0.001)YS(0.033)NDT(0.009)T(0.062)EAES(0.896)PRT(0.895)PS(0.104)R	18	3	-0.090058			1001;1002	1001	0.663835	0.843446	0.48657	-2.63457	-2.97944	-2.44457	5.75001e-05	3.35081	10.2022
B6TMR1	100216750	B6TMR1;B4FJK0;A0A3L6E6I0	131;131;131	B6TMR1	0.00210349	35.452	1	T	GGVLPNINPVLLPKKTAVAAAKEGKEKKSPK	X;X;X;X;X;X;X;X;X;X;X;X;X;X;X;Phospho (STY);X;X;X;X;X;X;X;X;X;X;X;X;X;X;X	XXXXXXXXXXXXXXPPPPPPPPXXXXXXXXX	KT(1)AVAAAK	2	3	-0.17232			5129;5130	5130	1.15666	1.06563	1.11002	0.522028	0.426761	0.508437	9.50422e-05	0.625028	1.54224
C4JC33	100502502	C4JC33;A0A3L6EBU5;A0A1D6LVR6	426;426;140	C4JC33	4.28e-85	175.52	1	T	HSLASDHHRYYQPALTPEPRQLPLVLEPRYV	X;X;X;X;X;X;X;X;X;X;X;X;X;X;X;Phospho (STY);X;X;X;X;X;X;X;X;X;X;X;X;X;X;X	XXXXXXXXXPPPPPPPPPPPXXXXXXXXXXX	YYQPALT(1)PEPR	7	2	-0.70656			10434;10435;10436;10437	10437	2.34653	2.35079	2.29515	1.51398	1.59355	1.6419	5.50341e-05	0.747677	1.67909
A0A3L6ECH6	PSY1R_5	A0A3L6ECH6	5	A0A3L6ECH6	0.0182367	18.844	2	T	___________MDLRTADFSLNKFNGTIPES	X;X;X;X;X;X;X;X;X;X;X;X;X;X;X;Phospho (STY);X;X;X;Phospho (STY);X;X;X;X;X;X;X;X;X;X;X	XXXXXXXXXXXXPPPPPPPPPPPXXXXXXXX	DLRT(1)ADFS(1)LNK	4	2	-4.3157			1447	1447	2.2501	1.85221	2.13135	1.40833	1.48993	1.48926	0.00705287	0.615376	1.53196
A0A3L6ETJ0	TSS_2	A0A3L6ETJ0	1279	A0A3L6ETJ0	1.09e-31	124.04	1;3	T	SPRVSPSEAAVSIGSTPLAKKLAKSSSFNSK	Phospho (STY);X;X;X;X;X;Phospho (STY);X;X;X;X;Phospho (STY);X;X;X;Phospho (STY);X;X;X;X;X;X;X;X;X;X;Phospho (STY);X;X;X;X	PPPPPPPPPPPPPPPPPPPPXXXXXXXXXXX	VSPSEAAVSIGS(0.183)T(0.817)PLAK	13	3	0.47547			3698;3699;9933	9933	3.01497	2.94217	3.07991	1.09827	1.19912	1.102	3.4192e-06	1.87922	3.67877
P05348	RBCS	P05348;B4FSJ3;A0A3L6F452;B7ZYT6;O24574;A0A3L6G1J9	70;70;70;53;70;70	P05348	1.77e-30	124.67	1	T	GNKKFETLSYLPPLSTDDLLKQVDYLLRNGW	X;X;X;X;X;X;X;X;X;X;X;X;X;X;X;Phospho (STY);X;X;X;X;X;X;X;X;X;X;X;X;X;X;X	XXXPPPPPPPPPPPPPPPPPPXXXXXXXXXX	KFETLSY(0.011)LPPLS(0.125)T(0.864)DDLLK	13	3	-0.10804			2155;2156;4724;4725	4725	2.76471	2.79899	2.71832	2.19589	1.88837	2.15373	0.00234033	0.681343	1.60363
A0A3L6FK46	NUP50A_1	A0A3L6FK46;B4FYD7;B6TKF2	222;222;222	A0A3L6FK46	1.37e-05	58.73	1	T	DGGDDTGGESEQKGQTPSATPLFSFKNLSSG	X;X;X;X;X;X;X;X;X;X;X;X;X;X;X;Phospho (STY);X;X;X;X;X;X;X;X;X;X;X;X;X;X;X	XXXXXXXXXXXXXPPPPPPPPPPPPPXXXXX	GQT(0.873)PS(0.124)AT(0.003)PLFSFK	3	3	0.31691			3563	3563	-0.701633	-0.493629	-0.272429	-1.09603	-1.65628	-1.17604	0.018684	0.820222	1.76568
B4FXB0	100282021	B4FXB0;A0A3L6FT41	203;203	B4FXB0	1.32e-32	128.43	1	T	GYPGGKFFDPLGLAGTVKDGVYVPDVEKLER	X;X;X;X;X;X;X;X;X;X;X;X;X;X;X;Phospho (STY);X;X;X;X;X;X;X;X;X;X;X;X;X;X;X	XXXXXXPPPPPPPPPPPPPPPPPPPPPPXXX	FFDPLGLAGT(1)VK	10	2	1.0301			2158;2159;2163;2164	2159	2.4505	2.27416	2.39767	1.96246	1.19524	1.8465	0.0446244	0.706045	1.63133
A0A3L6FVU1	REMO_0	A0A3L6FVU1	43	A0A3L6FVU1	4.26e-10	77.599	1	T	AAKEDVADDKAVIPATDPPPPPADDSKALAI	X;X;X;X;X;X;X;X;X;X;X;X;X;X;X;Phospho (STY);X;X;X;X;X;X;X;X;X;X;X;X;X;X;X	XXXPPPPPPPPPPPPPPPPPPPPPPPPPPPP	EDVADDKAVIPAT(0.848)DPPPPPADDS(0.152)KALAIVEK	13	4	2.0156			1696	1696	1.87282	1.93161	1.94926	-0.337166	-0.000615929	-0.489169	0.00011493	2.19355	4.57429
B6T037	542321	B6T037;K7TXI5;A0A3L6GA69;B6TRW9;B4F9J6	194;198;198;56;99	B6T037	1.32e-32	128.43	1	T	GYPGGKFFDPLGLAGTVKDGVYIPDVDKLER	X;X;X;X;X;X;X;X;X;X;X;X;X;X;X;Phospho (STY);X;X;X;X;X;X;X;X;X;X;X;X;X;X;X	XXXXXXPPPPPPPPPPPPPPPPPPPPPPPPP	FFDPLGLAGT(1)VK	10	2	1.0301			2158;2159;2160;2161;2162	2159	2.18973	2.04459	2.23718	1.59219	0.867945	1.5595	0.0282743	0.817288	1.76209
B6T623		B6T623;B4FK60;A0A3L6F7V8;A0A3L6F7D4;A0A1D6Q0L8	15;15;15;48;43	B6T623	6.55e-06	66.641	2	T	_MSQAKEVRYTARSITPPADRNGTSRSPPPK	X;X;X;X;X;X;X;X;X;X;X;X;X;Phospho (STY);X;Phospho (STY);X;X;X;X;X;X;X;X;X;X;X;X;X;X;X	XXXXXXXXXPPPPPPPPPPPPXXXXXXXXXX	Y(0.001)T(0.01)ARS(0.99)IT(1)PPADR	7	3	0.44258			10398;10399;10400;10401;10402;10403	10401	2.55539	2.49995	2.36919	1.71741	1.68493	1.74797	0.00019944	0.758072	1.69123
B6TQX4	100272715	B6TQX4;B4FQ41;B6SJN1;A0A317Y6U8;B6ST80;B6SKM1;A0A1D6KQJ5;A0A1D6KQJ6	27;27;27;27;27;27;27;27	B6TQX4	1.94e-06	73.655	1	T	GPRPETGLEKLRKATTARPLVINKDADGGSY	X;X;X;X;X;X;X;X;X;X;X;X;X;X;X;Phospho (STY);X;X;X;X;X;X;X;X;X;X;X;X;X;X;X	XXXXXXXXXXXXPPPPPPPPPPPPXXXXXXX	KAT(0.035)T(0.965)ARPLVINK	4	4	0.60795			4526;4527	4527	2.73511	2.53971	2.42579	0.808513	0.851107	0.973187	8.06726e-05	1.68927	3.22493
B6TVK1	Zm00014a_033351	B6TVK1;A0A3L6EA34	137;129	B6TVK1	9.75e-09	88.383	1	T	TGGSSVPFDWEERPGTPKRGLGGGVPAADVA	X;X;X;X;X;X;X;X;X;X;X;X;X;X;X;Phospho (STY);X;X;X;X;X;X;X;X;X;X;X;X;X;X;X	PPPPPPPPPPPPPPPPPPXXXXXXXXXXXXX	LYAATGGS(0.001)S(0.032)VPFDWEERPGT(0.967)PK	20	4	4.072			6081	6081	-0.330551	-0.30679	-0.398195	-1.0138	-0.844784	-1.09279	0.0012185	0.638615	1.55683
A0A5P8KLB8	psaA	A0A5P8KLB8;A0A3B6UD72;A0A172FJE9;A0A059Q6W8;P04966	5;5;5;5;5	A0A5P8KLB8	0.00173539	9.3356	1	S	___________MIIRSSEPEVKIAVDRDPIK	X;X;X;X;X;X;X;X;X;X;X;X;X;X;X;Phospho (STY);X;X;X;X;X;X;X;X;X;X;X;X;X;X;X	XXXXXXXXXXXXPPPPPPPPPPXXXXXXXXX	IIRS(0.975)S(0.025)EPEVK	4	3	0.21934			4232	4232	-1.33481	-1.35535	-1.49385	-0.238543	-0.152285	-0.412526	0.000248542	-1.12689	0.457903
A0A1D6EQ21	103647435	A0A1D6EQ21;A0A1D6EQ23;A0A1D6I4J7;Q67BC7;A0A3L6FT15;A0A3L6E223;A0A077D360	201;201;202;202;201;202;201	A0A1D6EQ21	4.11e-12	106.96	1;2	S	SLHKRIHPYPVSEPGSAKWDEKKEVSWKERM	X;X;X;X;X;X;X;X;Phospho (STY);X;X;X;X;X;X;Phospho (STY);X;X;X;X;X;X;X;X;X;X;X;X;X;X;X	XXXXXPPPPPPPPPPPPPPPPPXXXXXXXXX	IHPYPVSEPGS(1)AK	11	3	0.61635			4197;4198	4197	0.314122	0.545382	0.392004	0.83245	1.24654	0.942814	0.0139339	-0.590098	0.664298
A0A1D6ERE7	100279723	A0A1D6ERE7;A0A1D6ERE9;A0A1D6ERE2;B7ZZL8;A0A3L6FU83;A0A096PQL5	264;177;231;264;264;264	A0A1D6ERE7	4.63e-06	75.045	1	S	NIIEWKEKAVESKSLSWGFAEAKCISK____	X;X;X;X;X;X;X;X;X;X;X;X;X;X;X;Phospho (STY);X;X;X;X;X;X;X;X;X;X;X;X;X;X;X	XXXXXXXXXXXXXPPPPPPPPPPXXXXXXXX	S(0.028)LS(0.972)WGFAEAK	3	2	-0.50997			8069	8069	0.634749	0.520334	0.529301	1.09293	1.11331	1.34409	0.00216148	-0.621983	0.649777
A0A3L6FM16	HIP_1	A0A3L6FM16;A0A096PY84	258;258	A0A3L6FM16	1.12e-18	107.03	1	S	KSNPPPLPKLVPFSNSPPSSTKPLAADSSEK	X;X;X;X;X;X;X;X;X;X;X;X;X;X;X;Phospho (STY);X;X;X;X;X;X;X;X;X;X;X;X;X;X;X	XXXXXXXXXPPPPPPPPPPPPPPPPPPPPPP	LVPFS(0.005)NS(0.995)PPSSTKPLAADSSEK	7	4	0.8192			6038	6038	0.121035	0.27626	-0.0395896	0.781964	0.887537	1.07686	0.00316361	-0.796219	0.575856
A0A1D6F6G9	100304013	A0A1D6F6G9;A0A1D6QI34;A0A096RNP6;A0A1D6QI33;K0DCL1;B6TI74;A0A3L6FYZ2;Q8W0W6;F1DJZ4;B6SI55;A0A3L6EXX9	31;33;78;78;95;95;95;95;95;95;204	A0A1D6F6G9	0.0110661	20.47	1	S	LTEVVSKVPDLGGADSCGDERVLPRRRKSNG	X;X;X;X;X;X;X;X;X;X;X;X;X;X;X;Phospho (STY);X;X;X;X;X;X;X;X;X;X;X;X;X;X;X	XXXXXXXPPPPPPPPPPPPPPXXXXXXXXXX	VPDLGGADS(1)CGDER	9	2	-0.4042			9827	9827	-1.62279	-1.90825	-1.31464	-1.0297	-0.28338	-0.785447	0.0303196	-0.915717	0.53008
A0A3L6FSN5	CAHC_0	A0A3L6FSN5;A0A096RZN2;B4F9E2;Q41729;Q41728	282;282;234;282;375	A0A3L6FSN5	4.4e-09	84.626	1	S	VNVYDKKPELFGPLKSGQAPKYMVFACSDSR	X;X;X;X;X;X;X;X;X;X;X;X;X;X;X;Phospho (STY);X;X;X;X;X;X;X;X;X;X;X;X;X;X;X	XXXXXXPPPPPPPPPPPPPPPXXXXXXXXXX	KPELFGPLKS(1)GQAPK	10	4	0.12055			4991	4991	-0.125751	0.0395334	-0.260594	0.738034	0.100355	0.572273	0.0492059	-0.585824	0.666269
A0A3L6FSN5	CAHC_0	A0A3L6FSN5;A0A096RZN2;B4F9E2;Q41729;B4F9L3;Q41728;A0A1D6NHQ7;B6SVK2;B6SU63;C0P441;A0A3L6DP32	58;58;10;58;58;151;10;58;60;53;53	A0A3L6FSN5	0.00800921	39.444	1	S	KASSKGMDPTVERLKSGFQKFKTEVYDKKPE	X;X;X;X;X;X;X;X;X;X;X;X;X;X;X;Phospho (STY);X;X;X;X;X;X;X;X;X;X;X;X;X;X;X	XXXXXXXXXXXXXPPPPPPPXXXXXXXXXXX	LKS(1)GFQK	3	3	0.045675			5543	5543	1.19579	1.26757	1.18608	2.40407	2.57021	2.50897	2.01818e-05	-1.27794	0.412385
A0A3L6FSN5	CAHC_0	A0A3L6FSN5;A0A096RZN2;B4F9E2;Q41729;Q41728	260;260;212;260;353	A0A3L6FSN5	4.16e-55	114.22	1	S	FVTWEPPQDAIERLTSGFQQFKVNVYDKKPE	X;X;X;X;X;X;X;X;X;X;X;X;X;X;X;Phospho (STY);X;X;X;X;X;X;X;X;X;X;X;X;X;X;X	XXXXXXXXXXXXXPPPPPPPPPXXXXXXXXX	LT(0.003)S(0.997)GFQQFK	3	2	0.99426			5975;5976	5975	3.53284	3.53216	3.2596	4.13893	4.33271	4.24245	0.00172798	-0.796502	0.575743
A0A1D6KWY5	100191411	A0A1D6KWY5;A0A3L6FRC5;O65160;B8A362;A0A096S8H0;A0A317Y6H5;A0A3L6EII9;A0A1D6GLE1;B6U275	25;25;25;25;25;25;25;25;25	A0A1D6KWY5	0.00231029	42.45	1	S	DNTKYYEILGVPKSASQDDLKKAYRKAAIKN	X;X;X;X;X;X;X;X;X;X;X;X;X;X;X;Phospho (STY);X;X;X;X;X;X;X;X;X;X;X;X;X;X;X	XXXXXXXXXXXXXPPPPPPPPPXXXXXXXXX	S(0.234)AS(0.766)QDDLKK	3	3	0.71786			7502	7502	-0.124306	-0.24181	-0.148945	0.408912	0.640615	0.538222	0.000767519	-0.700937	0.615173
A0A1D6E0C7	103645972	A0A1D6E0C7;A0A1D6E0B4;A0A1D6E0B5;A0A1D6E0B6;A0A096SBT9;A0A1D6H263;A0A1D6KJK0;A0A3L6G6Y9;A0A1D6KJJ2;A0A1D6JDM1;K7TW41;A0A1D6H249;A0A1D6JDM3;A0A1D6KJK1;A0A1D6KJJ7;A0A1D6H235;A0A1D6KJJ0;A0A1D6H248;A0A1D6H246;A0A1D6KJI9;A0A1D6H260;A0A1D6H236;A0A1D6KJJ5;A0A1D6H256;A0A1D6H240;A0A1D6H252;A0A1D6H261;A0A317Y302;A0A1D6I7L3;A0A1D6I7L2;A0A3L6FZA0	54;54;54;54;54;67;63;58;63;58;58;67;58;63;63;67;63;67;67;63;67;67;63;67;67;67;67;63;49;49;58	A0A1D6E0C7	0.00333444	32.509	1	S	ERLRKWRQAALVLNASRRFRYTLDLKKEEQN	X;X;X;X;X;X;X;X;X;X;X;X;X;X;X;Phospho (STY);X;X;X;X;X;Phospho (STY);X;X;X;X;X;X;X;X;X	XXXXXXXPPPPPPPPPPPXXXXXXXXXXXXX	QAALVLNAS(1)RR	9	3	-0.29013			6626	6626	-3.01706	-2.54227	-2.92427	-2.3045	-2.00629	-2.07267	0.0149613	-0.700045	0.615553
A0A1D6E0C7	103645972	A0A1D6E0C7;A0A1D6E0B4;A0A1D6E0B5;A0A1D6E0B6;A0A096SBT9	15;15;15;15;15	A0A1D6E0C7	8.34e-80	162.43	1	S	_MESSSSGGGLARRRSSGGWGSFSGDTDPFD	X;X;X;X;X;X;X;X;X;X;X;X;X;X;X;Phospho (STY);X;X;X;X;X;X;X;X;X;X;X;X;X;X;X	XXXXXXXXXXXXXXXPPPPPPPPPPPPPPPP	S(0.835)S(0.164)GGWGS(0.001)FSGDTDPFDIPAK	1	3	0.70381			8367;8368	8368	1.06087	1.11836	0.939652	2.10693	2.35167	2.33152	0.000204976	-1.22375	0.428169
C0PF19	100383313	C0PF19;A0A1D6IKZ5;A0A1D6IKZ2;A0A1D6F2C0;A0A1D6IKY7;A0A096TQ95;A0A3L6FSL9;A0A1D6F2C4;A0A1D6K404;B6SYP7;A0A1D6K402;B4FRT4;A0A1D6K3Y8;A0A317Y382;Q9FYU0;CaMkinasehomolog;A0A3L6ECJ0;Q41791;B4FQE5;A0A1D6K3Y6;Q41792;A0A1D6IKZ8;A0A3L6DHG7;A0A1D6P9D9;B7ZZ80;A0A1D6P9E1;A0A1D6P9E9;A0A1D6IKZ6;A0A1D6K408;A0A1D6GN25;A0A1D6K3Z8;A0A1D6K3Z2;A0A1D6IKZ7;B4FIC1;A0A1D6F1U2;A0A1D6K3Z1;A0A1D6GWA1;C0HGS6;A0A1D6GN24;A0A1…	349;349;349;349;349;349;349;349;343;382;343;343;427;343;366;384;367;358;367;396;366;321;334;346;346;346;140;172;172;24;74;140;119;130;130;140;172;172;172;172;172;187;190;211;346;249;358;330;330;358;358;358;359	C0PF19	2.01e-05	60.821	1	S	YILLCGSRPFWARTESGIFRAVLKAEPSFDE;YILLCGSRPFWARTESGIFRSVLKADPSYNE	X;X;X;X;X;X;X;X;X;X;X;X;X;X;X;Phospho (STY);X;X;X;X;X;X;X;X;X;X;X;X;X;X;X	XXXXXXXXXXXXXPPPPPPPXXXXXXXXXXX	T(0.019)ES(0.981)GIFR	3	2	0.061144			8984	8984	0.413405	0.509489	0.3798	1.34505	1.27433	1.52439	0.000351973	-0.947023	0.518702
A0A1D6K2X6	ZEAMMB73_Zm00001d029133	A0A1D6K2X6;A0A1D6K2X2;A0A1D6K2X1;A0A1D6K2X8;A0A1D6K2X7;A0A1D6K2V4;A0A1D6K2X0;A0A1D6K2X5;A0A317Y5U3;A0A1D6K2V8;A0A097PNQ2;A0A1D6K2V5;A0A1D6K2V7;A0A1D6K2W2;A0A1D6K2W1;A0A1D6K2V6	156;353;353;290;340;353;354;357;445;573;642;643;659;699;740;754	A0A1D6K2X6	0.0124917	17.35	1	S	QPAPAERPGRIRRLESHVKNAEDEERTLEES	X;X;X;X;X;X;X;X;X;X;X;X;X;X;X;Phospho (STY);X;X;X;X;X;X;X;X;X;X;X;X;X;X;X	XXXXXXXXXXXXPPPPPPPXXXXXXXXXXXX	RLES(1)HVK	4	3	-0.067773			7067	7067	-1.51074	-1.63224	-1.31	-0.880491	-0.863408	-0.944425	0.00375335	-0.588218	0.665164
A0A3L6FFF7	CESA4_0	A0A3L6FFF7;A0A0B4J329;Q67BC8;A0A1D6KKT4;A0A3L6FGN2	127;127;127;43;125	A0A3L6FFF7	0.000990117	41.408	1	S	LNDESGKPIWKNRVESWKEKKNEKKASAKKT	X;X;X;X;X;X;X;X;X;X;X;X;X;X;X;Phospho (STY);X;X;X;X;X;X;X;X;X;X;X;X;X;X;X	XXXXXXXXXXXPPPPPPPPPXXXXXXXXXXX	NRVES(1)WKEK	5	4	-0.12164			6504	6504	-1.26978	-1.45221	-2.06559	-0.507755	0.120669	-0.494471	0.0148683	-1.30201	0.405562
A0A1D6DZX9	100274241	A0A1D6DZX9;A0A3L6FS14;A0A1D6DZY0;A0A1D6DZY3;W5U5A2	13;13;13;13;13	A0A1D6DZX9	0.00159379	42.915	1	S	___MAAATGGMRKAPSLEWRWVSTEDDDDED	X;X;X;X;X;X;X;X;X;X;X;X;X;X;X;Phospho (STY);X;X;X;X;X;X;X;X;X;X;X;X;X;X;X	XXXXXXXXXXXXPPPPPPPPXXXXXXXXXXX	KAPS(1)LEWR	4	3	-0.063807			4508;4509	4509	1.0329	1.3323	1.22567	1.96253	2.0043	1.82367	0.00207571	-0.733212	0.601563
B8A0W8	100279951	B8A0W8;A0A1D6E1R3;A0A1D6E1R5;A0A3L6FYF3;A0A1D6E1R2	385;829;873;890;890	B8A0W8	0.000360408	42.217	1	S	GAIRRSSRSSIRSFLSFADRREAQCPRGSCK	X;X;X;X;X;X;X;X;X;X;X;X;X;X;X;Phospho (STY);X;X;X;X;X;X;X;X;X;X;X;X;X;X;X	XXXXXXXXXXXXPPPPPPPPPXXXXXXXXXX	SFLS(1)FADR	4	2	-0.30763			7657;7658	7657	-0.220268	-0.449249	-0.423408	0.367552	0.178424	0.517111	0.00413284	-0.718671	0.607657
A0A1D6JD02	103641987	A0A1D6JD02;A0A3L6G3F2;A0A1D6E3F0;A0A3L6GDS1;A0A1D6JD04;K7U642;A0A1D6HFI3;C0HF87;A0A3L6EUE2	136;136;136;136;136;136;167;167;173	A0A1D6JD02	4.31e-08	19.879	1	S	AGGDSGEDPPSRLIGSFLRKQAAAGGELSLD	X;X;X;X;X;X;X;X;X;X;X;X;X;X;X;Phospho (STY);X;X;X;X;X;X;X;X;X;X;X;X;X;X;X	XXXXXXXXXXXXPPPPPPPXXXXXXXXXXXX	LIGS(1)FLR	4	2	-0.23525			5511	5511	-1.80585	-1.55236	-1.67993	-0.536818	-0.796554	-0.418361	0.00120265	-1.09547	0.467984
A0A1D6E3P9	ZEAMMB73_Zm00001d002715	A0A1D6E3P9;A0A1D6E3Q2;A0A1D6E3P8;A0A1D6E3Q1;A0A1D6E3P6;A0A1D6E3P5;A0A1D6E3P3;A0A3L6FZU6;A0A1D6E3P1	227;27;483;27;694;732;770;948;948	A0A1D6E3P9	1.69e-123	188.91	1	S	GSENGLLKNLGGISFSITSDNVRNNVYNVDK	X;X;X;X;X;X;X;X;X;X;X;X;X;X;X;Phospho (STY);X;X;X;X;X;X;X;X;X;X;X;X;X;X;X	XXXXXXXXPPPPPPPPPPPPPPPXXXXXXXX	NLGGIS(0.232)FS(0.765)IT(0.003)SDNVR	8	2	1.4324			6405	6405	1.41012	1.20481	1.27131	2.07866	2.37679	2.21045	0.000921781	-0.926554	0.526113
A0A1D6J9Y7	ZEAMMB73_Zm00001d025817	A0A1D6J9Y7;A0A1D6E6C6;A0A1D6J9Y9;A0A1D6E6E1;A0A1D6E6D5;A0A1D6J9Y0;A0A1D6J9X9;A0A1D6E6C2;A0A1D6J9W5;A0A1D6E6D3;A0A1D6J9V7;A0A1D6J9U8;A0A1D6E6E5;A0A1D6J9Z0;A0A1D6E6C3;A0A1D6E6D4;A0A1D6J9W8;A0A1D6E6C9;A0A1D6J9U9;A0A3L6G7Y5;A0A3L6G3N8;A0A1D6E6C0;A0A1D6E6D0;A0A1D6J9X5;A0A1D6E6E9;A0A1D6J9Y1;A0A1D6J9Y3;A0A1D6E6F7;A0A1D6E6D1;A0A1D6E6E6;A0A1D6J9V6;A0A1D6J9V0;A0A1D6E6F6;A0A1D6J9X8;A0A1D6J9V2;A0A1D6E6F2;A0A…	584;584;416;416;537;537;584;584;474;474;537;584;398;551;551;557;565;565;584;584;584;584;537;398;259;183;109;109;131;355;355;278;210;215;259;259;274;278;398;416;51;52;231;215	A0A1D6J9Y7	8.12e-06	44.841	1	S	KTIDRSSERSLESVLSSSKEKVSAIESLLKG	X;X;X;X;X;X;X;X;X;X;X;X;X;X;X;Phospho (STY);X;X;X;X;X;X;X;X;X;X;X;X;X;X;X	XXXXXXXXXPPPPPPPPPPPPXXXXXXXXXX	SLESVLS(0.821)S(0.078)S(0.1)KEK	7	3	-0.010242			7988	7988	-0.18158	-0.131058	-0.45799	0.536189	1.9463	0.749481	0.0414724	-1.3342	0.396612
A0A1D6J9Y7	ZEAMMB73_Zm00001d025817	A0A1D6J9Y7;A0A1D6E6C6;A0A1D6J9Y9;A0A1D6E6E1;A0A1D6E6D5;A0A1D6J9Y0;A0A1D6J9X9;A0A1D6E6C2;A0A1D6J9W5;A0A1D6E6D3;A0A1D6J9V7;A0A1D6J9U8;A0A1D6E6E5;A0A1D6J9Z0;A0A1D6E6C3;A0A1D6E6D4;A0A1D6J9W8;A0A1D6E6C9;A0A1D6J9U9;A0A3L6G7Y5;A0A3L6G3N8;A0A1D6E6C0;A0A1D6E6D0;A0A1D6J9X5;A0A1D6E6E9;A0A1D6J9Y1;A0A1D6J9Y3;A0A1D6E6F7;A0A1D6E6D1;A0A1D6E6E6;A0A1D6J9V6;A0A1D6J9V0;A0A1D6E6F6;A0A1D6J9X8;A0A1D6J9V2;A0A1D6E6F2;A0A…	513;513;345;345;466;466;513;513;403;403;466;513;327;480;480;486;494;494;513;513;513;513;466;327;188;112;38;38;60;284;284;207;139;144;188;188;203;207;327;345;160;144	A0A1D6J9Y7	6.57e-05	9.0765	1	S	RIINDEDGGVHKRYASPSLRDRVVQPSRASS	X;X;X;X;X;X;X;X;X;X;X;X;X;X;X;Phospho (STY);X;X;X;X;X;X;X;X;X;X;X;X;X;X;X	XXXXXXXXXXXXXPPPPPPPXXXXXXXXXXX	YAS(0.932)PS(0.068)LR	3	2	0.13809			10229	10229	0.0266535	-0.0672375	-0.223241	0.436926	0.508067	0.585655	0.00211053	-0.598157	0.660597
A0A1D6E703	103646262	A0A1D6E703;A0A1D6E704;A0A1D6E705;A0A1D6E706;A0A3L6G0Z9	558;72;329;329;559	A0A1D6E703	7.57e-06	44.44	1	S	VHKTSSINTRLLPQGSGAALIGKSALLGTGV	X;X;X;X;X;X;X;X;X;X;X;X;X;X;X;Phospho (STY);X;X;X;X;X;X;X;X;X;X;X;X;X;X;X	XXXXXXXXXXPPPPPPPPPPPPPXXXXXXXX	LLPQGS(1)GAALIGK	6	3	0.48773			5629	5629	-1.17584	-1.51813	-1.52047	-0.539017	-0.435671	-0.722271	0.00409175	-0.839162	0.558968
A0A3L6G285	ASR1	A0A3L6G285;A0A1D6EB22	109;109	A0A3L6G285	1.11e-05	85.602	1	S	TGGGGYNKSGNDGYDSGYNRSGTTNDDEYGR	X;X;X;X;X;X;X;X;X;X;X;X;X;X;X;Phospho (STY);X;X;X;X;X;X;X;Phospho (STY);X;X;X;X;X;X;X	XXXXXXXXPPPPPPPPPPPPXXXXXXXXXXX	SGNDGYDS(1)GYNR	8	2	-0.84561			7736	7736	-2.05328	-2.13413	-2.09075	-1.4031	-1.24639	-1.06851	0.00101251	-0.85339	0.553483
C4J645	100501814	C4J645;A0A1D6ECN7;A0A3L6FRI7;A0A1D6ECN6	191;232;305;305	C4J645	2.04e-38	117.76	1	S	ASSSRQKEDQPEVILSEVEEEKSKETDSLPP	X;X;X;X;X;X;X;X;X;X;X;X;X;X;X;Phospho (STY);X;X;X;X;X;X;X;X;X;X;X;X;X;X;X	XXXXXPPPPPPPPPPPPPPPPPPPXXXXXXX	QKEDQPEVILS(1)EVEEEK	11	3	-1.7042			6716;6717	6716	1.64646	1.57546	1.46699	2.21227	2.50841	2.11798	0.00509386	-0.716581	0.608538
A0A1D6EE93	ZEAMMB73_Zm00001d004154	A0A1D6EE93;A0A1D6EE96;A0A1D6EE95;A0A3L6FRT7;A0A1D6EE94;A0A3L6FST2;A0A1D6EE91;A0A1D6EE87;A0A1D6EE89;A0A1D6EE88	94;229;229;476;476;476;476;448;476;476	A0A1D6EE93	4.26e-19	106.74	1	S	IESDLPFSKRLKRIPSDVLQDVTSVEELSFH	X;X;X;X;X;X;X;X;X;X;X;X;X;X;X;Phospho (STY);X;X;X;X;X;X;X;X;X;X;X;X;X;X;X	XXXXXXXXXXXXPPPPPPPPPPPPPPPPPPP	RIPS(1)DVLQDVTSVEELSFHNK	4	4	-0.44967			7032	7032	-1.88795	-1.59149	-1.96799	-0.809646	-0.299788	-0.740208	0.00364495	-1.19926	0.435498
A0A1D6EF34	ZEAMMB73_Zm00001d004396	A0A1D6EF34;A0A1D6J4D5;A0A1D6J4E7;A0A1D6EF72;A0A1D6J4C9;A0A3L6FRR4;A0A1D6EF31;A0A1D6EF33;A0A1D6EF65;A0A1D6J4C1;A0A1D6J4C8;A0A3L6GCK5;A0A1D6EF63;A0A1D6J4E3;A0A1D6J4F1;A0A1D6EF59;A0A1D6EF46;A0A1D6EF61;A0A1D6EF52	44;512;527;512;512;512;512;446;512;430;44;430;512;512;187;187;125;125;528	A0A1D6EF34	0.000140923	61.704	1	S	ENDSSRGSNTLTRSTSKIPFVQGKTNDFSII	X;X;X;X;X;X;X;X;X;X;X;X;X;X;X;Phospho (STY);X;X;X;X;X;X;X;X;X;X;X;X;X;X;X	XXXXXXXXXXXXXPPPPPPPPPPPXXXXXXX	S(0.055)T(0.074)S(0.872)KIPFVQGK	3	3	0.67186			8611;8612	8612	0.0574472	0.0620729	-0.000509013	1.38488	1.64163	1.44822	5.36805e-05	-1.45191	0.365538
Q9ATM8	PIP2-2	Q9ATM8;A0A1D6EMG1;A0A1D6EMG0;B6TS83;A0A1D6EMF1;A0A1D6EMG2;A0A1D6EMF6;A0A1D6EMF9;A0A1D6EMF3;A0A1D6EMF7;A0A1D6EMF4;A0A1D6EMG3;A0A1D6EMF8;A0A3L6FRU6;B4FCN0;Q9ATM4;A0A1D6HYR1;A0A1D6HYR5;B6T634;Q84RL7;B6TR18;A0A3L6E1S5;B4FA22;A0A1D6HYR4;A0A1D6HYR0;A0A1D6HYR6;A0A1D6HYR9;A0A1D6HYQ7;A0A1D6HYQ8;A0A1D6HYQ9	290;168;194;290;220;223;234;163;258;259;262;264;152;292;292;285;125;256;288;288;288;288;288;260;257;232;218;192;161;150	A0A1D6HYR1	0.00550462	45.609	2	S	YILRAGAIKALGSFRSNA_____________	X;X;X;X;X;X;X;X;X;X;X;X;Phospho (STY);X;X;Phospho (STY);X;X;X;X;X;X;X;X;X;X;X;X;X;X;X	XXXXXXXXXPPPPPPPPPXXXXXXXXXXXXX	ALGS(1)FRS(1)NA	7	2	0.012331			548;549;550;551;552;553;554;555;556;557	557	3.36636	3.4184	3.37371	4.07113	3.90786	3.97898	0.000276289	-0.599832	0.659831
A0A1D6EVM9	103647671	A0A1D6EVM9;A0A3L6FTU3;A0A1D6IBK1;A0A3L6DXE4	210;210;218;220	A0A1D6EVM9	0.000243291	53.778	1	S	YYAEGSYGDQQQQQRSFSAVANKAAAPQPQV	X;X;X;X;X;X;X;X;X;X;X;X;X;X;X;Phospho (STY);X;X;X;X;X;X;X;X;X;X;X;X;X;X;X	XXXXXXXXXXXXXXXPPPPPPPPXXXXXXXX	S(0.998)FS(0.002)AVANK	1	2	-1.0534			7666;7667	7666	0.521421	0.536894	0.419103	1.43384	1.71243	1.38761	0.000703366	-1.01882	0.493519
A0A1D6EXJ7	100383299	A0A1D6EXJ7;A0A1D6EXG7;A0A1D6EXJ9;A0A1D6EXJ1;A0A1D6EXH2;A0A3L6FV92	429;753;763;806;807;1107	A0A1D6EXJ7	0.000263965	77.448	1	S	TALAANFESSSNRNLSTPPPVVKKLYPKSVT	X;X;X;X;X;X;X;X;X;X;X;X;X;X;X;Phospho (STY);X;X;X;X;X;X;X;X;X;X;X;X;X;X;Phospho (STY)	XXXXXXXXXXXXXPPPPPPPPPPXXXXXXXX	NLS(0.882)T(0.118)PPPVVK	3	2	-0.48844			6435;6437;6439	6435	-0.49282	-0.456845	-0.395068	0.25695	0.322151	0.219357	6.63746e-05	-0.714397	0.60946
A0A1D6F0F5	100285025	A0A1D6F0F5;A0A1D6F0E6;A0A1D6F0F7;A0A1D6F0F2;A0A1D6F0F4;A0A3L6FQC5;A0A1D6F0E8;A0A1D6F0E7;A0A1D6F0E9	580;339;580;580;580;580;580;580;580	A0A1D6F0F5	0.00167741	43.328	1	S	MDAWKEKRNWEDILKSPVRSSRVSHSPGVGR	X;X;X;X;X;X;X;X;X;X;X;X;X;X;X;Phospho (STY);X;X;X;X;X;X;X;X;X;X;X;X;X;X;X	XXXXXXXXPPPPPPPPPPPXXXXXXXXXXXX	NWEDILKS(1)PVR	8	3	-0.18782			6543	6543	-0.56509	-0.804853	-0.986761	-0.0208022	0.169291	0.0899802	0.00296218	-0.865058	0.549025
A0A1D6F1Z6	100272627	A0A1D6F1Z6;B4FPN9;A0A1D6F1Z3;A0A3L6G1R2;A0A1D6F1Y5;B4G1Y4;A0A1D6F1Z5	142;230;231;179;203;217;218	A0A1D6F1Z6	0.0138209	23.625	1	S	ASRSPSRSPPRKTPPSPKRSPVRHNDDRSPR	X;X;X;X;X;X;X;X;X;X;X;X;X;X;X;Phospho (STY);X;X;X;X;X;X;X;X;X;X;X;X;X;X;X	XXXXXXXXXXXPPPPPPPXXXXXXXXXXXXX	KT(0.027)PPS(0.973)PK	5	3	-0.69115			5135	5135	-1.52755	-1.36456	-1.49347	-0.106611	-0.473417	-0.0627422	0.000860673	-1.2476	0.421148
A0A1D6F1Z6	100272627	A0A1D6F1Z6;B4FPN9;A0A1D6F1Z3;C4J6F0	84;172;172;172	A0A1D6F1Z6	0.000700783	43.351	1	S	YRDRDYRHRSLSRRYSPDDYKKRGRDSLSPA	X;X;X;X;X;X;X;X;X;X;X;X;X;X;X;Phospho (STY);X;X;X;X;X;X;X;X;X;X;X;X;X;X;X	XXXXXXXXXXXXXPPPPPPPPPXXXXXXXXX	RYS(0.999)PDDYKK	3	4	0.74026			7378	7378	-2.67221	-2.73223	-2.70903	-0.255401	-0.611664	-0.393159	2.65895e-05	-2.28442	0.205268
A0A1D6HKY3	ZEAMMB73_Zm00001d018129	A0A1D6HKY3;A0A3L6EES4;A0A1D6HKY4;A0A3L6G4M6;A0A3L6ERC6;A0A1D6F5P7;A0A1R3QCP8;A0A1D6KGS6;A0A1D6FSU6;A0A1D6Q3S1;A0A1D6PN43;A0A1D6PN42;B4FXW5;A0A3L6F698;A0A1D6PN41	50;67;67;62;67;125;159;159;67;159;50;154;248;278;278	A0A1D6HKY3	2.24e-45	139.35	1	S	IEFPLPFGRVLSPTESFIHELDEKGVFRIAD	X;X;X;X;X;X;X;X;X;X;X;X;X;X;X;Phospho (STY);X;X;X;X;X;X;X;X;X;X;X;X;X;X;X	XXXXXXXXXPPPPPPPPPPPPPPPXXXXXXX	VLSPT(0.002)ES(0.997)FIHELDEK	7	3	-0.88617			9795	9795	-0.891694	-0.67947	-0.937845	0.10839	0.597046	0.47884	0.00181755	-1.2311	0.425994
A0A1D6J097	100286075	A0A1D6J097;A0A1D6PW09;B6UH15;A0A1D6F5V4;A0A1D6PW14;A0A3L6E4A0;B4FGQ6;B6UGU1;B6UE26;B6U6W1;B6T8R5;B6T098;B6SIF8;B4FXX2;A0A3L6G7F7;A0A3L6F636;A0A3L6F2Q7;A0A317Y5B2;K7UV45;K7URU0;A0A3L6DPD4;A0A1D6PW08;A0A1D6KNZ3;A0A3L6GDG7	12;12;12;70;12;12;12;12;12;12;12;12;12;12;12;12;12;12;12;12;12;12;12;12	A0A1D6J097	0.0118196	23.958	1	S	____MVQRLTYRKRHSYATKSNQTRVVKTPV	X;X;X;X;X;X;X;X;X;X;X;X;X;X;X;Phospho (STY);X;X;X;X;X;X;X;X;X;X;X;X;X;X;X	XXXXXXXXXXXXPPPPPPPPXXXXXXXXXXX	KRHS(0.993)Y(0.006)AT(0.001)K	4	4	-0.6131			5070	5070	-2.46488	-3.04109	-2.17378	-1.30274	-1.4446	-1.52855	0.0125411	-1.13462	0.455455
K7UCH1	103654524	K7UCH1;C0P8C6;A0A3L6F088;A0A1D6F6Y8;A0A3L6G0T0;A0A1D6F6Y7;A0A1D6F6Y9	265;265;265;265;270;280;280	K7UCH1	5.72e-48	152.69	1	S	VDTSATETKGTVLIHSAEQLENYAKTEEAKV	X;X;X;X;X;X;X;X;X;X;X;X;X;X;X;Phospho (STY);X;X;X;X;X;X;X;X;X;X;X;X;X;X;X	XXXXXXXXXPPPPPPPPPPPPPPPPXXXXXX	GTVLIHS(1)AEQLENYAK	7	3	0.55844			3706	3706	0.438386	0.467183	0.539818	1.18594	1.36162	1.25646	0.000186984	-0.786209	0.579866
A0A1D6F9X6	103648263	A0A1D6F9X6;A0A1D6F9Y4;A0A1D6F9X3;A0A3L6G0L0;A0A1D6F9X4;A0A1D6F9X5;A0A1D6F9Y1	99;99;99;101;99;99;99	A0A1D6F9X6	5.41e-33	116.66	1	S	PNGKPKPKPKVKRVQSAGLLAGSVLKRDSER	X;X;X;X;X;X;X;X;X;X;X;X;X;X;X;Phospho (STY);X;X;X;X;X;X;X;X;X;X;X;X;X;X;X	XXXXXXXXXXXXPPPPPPPPPPPPPPXXXXX	VQS(1)AGLLAGSVLK	3	3	0.24505			7351;9876;9877	9876	2.36272	2.24733	2.26561	2.8773	2.82136	3.045	0.00121747	-0.622666	0.64947
A0A1D6FA60	103648286	A0A1D6FA60;A0A1D6FA59;A0A1D6FA58;A0A3L6FY30	108;108;108;1779	A0A1D6FA60	3.34e-23	58.181	1;2	S	GQESPTGKNTFARLTSGLGLRLSPKAAQQDE	X;X;X;Phospho (STY);X;X;X;X;X;X;X;X;X;X;X;Phospho (STY);X;X;X;X;X;X;Phospho (STY);X;X;X;X;X;X;X;X	XXXXXXXXXXXXXPPPPPPPPPPPPXXXXXX	LT(0.005)S(0.995)GLGLR	3	2	-9.08e-05			5977;5979	5977	0.642834	0.864841	0.691954	1.70157	1.95006	1.84803	0.00036823	-1.10001	0.466512
C0HF66	ZEAMMB73_Zm00001d040036	C0HF66;A0A1D6MMC3;A0A1D6MMD2;A0A1D6FDR9;A0A1D6MMB1;A0A3L6FNG7;A0A1D6MMA9;A0A1D6FDS1;A0A1D6MMD1;K7V9X1;A0A3L6DQL2	52;154;740;741;590;740;740;715;740;741;741	C0HF66	2.36e-06	61.345	1	S	TGPLSVAFGFVTRLASDLFARGRRHLDRSSN	X;X;X;X;X;X;X;X;X;X;X;X;X;X;X;Phospho (STY);X;X;X;X;X;X;X;X;X;X;X;X;X;X;X	XXXXXXXXXXXXXPPPPPPPPXXXXXXXXXX	LAS(1)DLFAR	3	2	-0.4674			5272	5272	-1.69186	-1.99219	-1.54353	-0.355553	0.0338476	-0.20573	0.000842376	-1.56671	0.337577
A0A1D6FEE2	100273627	A0A1D6FEE2;A0A3L6DR14;K7UYP0;B4FWN7	33;33;33;33	A0A1D6FEE2	9.6e-09	50.731	1	S	AAEDGEADSPAPAPVSPTGAAAASGGGTEKK	X;X;X;X;X;X;X;X;X;X;X;X;X;X;X;Phospho (STY);X;X;X;X;X;X;X;X;X;X;X;X;X;X;X	PPPPPPPPPPPPPPPPPPPPPPPPPPPPPPX	MAAEDGEADS(0.003)PAPAPVS(0.895)PT(0.101)GAAAAS(0.001)GGGTEK	17	3	-0.36543			6094	6094	-2.7976	-2.39913	-2.41534	-1.70549	-1.76036	-2.02891	0.012645	-0.705772	0.613114
A0A1D6FID1	103635158	A0A1D6FID1;A0A1D6FID2;A0A1D6FID0;K7V0F9;A0A3L6DUK8;A0A1D6FIC7;A0A1D6MT28;A0A1D6MT30;A0A3L6FED4;A0A1D6MT17;A0A1D6MT19	133;133;133;133;133;26;129;129;129;129;129	A0A1D6FID1	0.0188645	44.837	1	S	TQLGKNMRKRLDRSKSGAAVALKGLQFVTAK	X;X;X;X;X;X;X;X;X;X;X;X;X;X;X;Phospho (STY);X;X;X;X;X;X;X;X;X;X;X;X;X;X;X	XXXXXXXXXXXXXPPPPPPPPPPXXXXXXXX	S(0.042)KS(0.958)GAAVALK	3	2	-0.33109			7937	7937	0.133139	0.0808785	0.107138	1.30315	1.42482	1.50672	2.83301e-05	-1.30451	0.404858
B4FSQ1		B4FSQ1;B7ZXN3;B4FRN8;A0A3L6DVF2;B4F910;A0A1D6FLS5	96;49;49;96;96;96	B4FSQ1	0.00118693	44.912	1	S	HRTAHNMSSSSLRKKSDLALLRKVPCAPLRR	X;X;X;X;X;X;X;X;X;X;X;X;X;X;X;Phospho (STY);X;X;X;X;X;X;X;X;X;X;X;X;X;X;X	XXXXXXXXXXXXXPPPPPPPPPXXXXXXXXX	KKS(1)DLALLR	3	3	0.78818			4863	4863	-0.545471	-0.329953	-0.283949	0.266628	0.117704	0.217695	0.00306238	-0.587133	0.665664
A0A3L6DJF4	CESA1_0	A0A3L6DJF4;A0A1D6FM38;K7V1Z8;Q9LLI9;A0A3L6E6N0;Q9LLI8;A0A1D6FM32;A0A1D6LZJ1;A0A1D6FM33;A0A1D6LZJ4;A0A3L6E4F9;A0A1D6LZJ2;A0A1D6FM36;A0A1D6LZJ0;A0A1D6FM34;A0A1D6P0Y6;A0A1D6FM37;A0A1D6LZJ3;A0A1D6GYK9;A0A1D6LZJ5;A0A1D6FM39	674;674;674;674;673;673;672;671;674;673;103;432;432;575;588;296;196;196;103;453;454	A0A3L6DJF4	0.000576598	64.2	1	S	CGRRKKKNKSYMDSQSRIMKRTESSAPIFNM	X;X;X;X;X;X;X;X;X;X;X;Oxidation (M);X;X;X;Phospho (STY);X;X;X;X;X;Phospho (STY);X;Phospho (STY);X;X;X;X;X;X;Oxidation (M)	XXXXXXXXXPPPPPPPPXXXXXXXXXXXXXX	SYMDSQS(1)R	7	2	-0.52936			8761	8761	-1.65477	-2.14959	-2.74937	0.27603	0.352742	0.394448	0.00136673	-2.52565	0.173662
A0A1D6FP04	778431	A0A1D6FP04;A0A1D6FP00;A0A1D6FNZ8;A0A1D6FP01;C4IYE1;A0A3L6DIQ0;A0A1D6FP11;A0A1D6FNZ7	79;79;79;79;79;79;79;79	A0A1D6FP04	2.61e-08	83.422	1	S	VGVGKQRLKYRKLVNSSFADLQKPQMELDGK	X;X;X;X;X;X;X;X;X;X;X;X;X;X;X;Phospho (STY);X;X;X;X;X;X;X;X;X;Oxidation (M);X;X;X;X;X	XXXXXXXXXXXXPPPPPPPPPPPPPPPPPPP	LVNS(0.841)S(0.159)FADLQKPQMELDGK	4	4	0.82721			6033;6034	6033	2.86097	2.69607	2.66341	3.80696	3.70177	3.95899	0.000359759	-1.08242	0.472236
A0A1D6FP04	778431	A0A1D6FP04;A0A1D6FP00;A0A1D6FNZ8;A0A1D6FP01;C4IYE1;A0A3L6DIQ0;A0A1D6FP11;A0A1D6FNZ7	80;80;80;80;80;80;80;80	A0A1D6FP04	9.19e-54	145.44	1	S	GVGKQRLKYRKLVNSSFADLQKPQMELDGKA	X;X;X;X;X;X;X;X;X;X;X;X;X;X;X;Phospho (STY);X;X;X;X;X;X;X;X;Oxidation (M);X;X;X;X;X;X	XXXXXXXXXXPPPPPPPPPPPPPPPPPPPPX	KLVNS(0.091)S(0.909)FADLQKPQMELDGK	6	4	-1.0008			4921;6035	4921	2.35141	2.26293	2.2103	3.28477	3.44312	3.4867	0.00010661	-1.12998	0.456921
A0A1D6FR79	103635738	A0A1D6FR79;A0A1D6M3C3;A0A1D6FR68;A0A1D6FR69;A0A3L6DIS4;A0A3L6EEX0;A0A1D6M3A7;A0A1D6M3D3;A0A1D6FR90;A0A1D6M3B8;A0A1D6FR87;A0A1D6FR95;A0A1D6M3D7;A0A1D6FR82;A0A1D6FR98;A0A1D6M3C5;A0A1D6M3C2;A0A1D6FR80;A0A1D6M3D0;A0A1D6FR77;A0A1D6M3B0;A0A1D6FR71;A0A1D6M3B5;A0A1D6FR88;A0A1D6M3D9;A0A1D6FR93;A0A1D6FR70	170;614;1272;1164;1069;1011;984;965;963;704;701;659;638;614;200;533;520;520;965;963;379;379;307;240;200;201;1320	A0A1D6FR79	0.0330915	26.819	1	S	CVDDDGILRVGFPGASRGWRADPAEIERVEE	X;X;X;X;X;X;X;X;X;X;X;X;X;X;X;Phospho (STY);X;X;X;X;X;X;X;X;X;X;X;X;X;X;X	XXXXXXXXXPPPPPPPPXXXXXXXXXXXXXX	VGFPGAS(1)R	7	2	0.18746			9638;9639	9639	-0.00551002	-0.16932	0.0683166	1.26881	1.48258	1.44325	0.000117837	-1.43372	0.370176
B8A2U5	100279465	B8A2U5;A0A1D6FS65;A0A3L6DM20;A0A1D6FS59;C0PG69;A0A3L6DM78;A0A1D6FS64;A0A1D6FS61	22;204;202;197;202;202;204;202	B8A2U5	0.00112927	31.287	1	S	GLDECVAEAFLFRLNSLVDASEQLVDFKKGE	X;X;X;X;X;X;X;X;X;X;X;X;X;X;X;Phospho (STY);X;X;X;X;X;X;X;X;X;X;X;X;X;X;X	XXXXXXXXXXXXXPPPPPPPPPPPPPPPXXX	LNS(0.996)LVDAS(0.004)EQLVDFK	3	3	0.42397			5696	5696	-2.84053	-3.37348	-3.14551	-2.60233	-2.17582	-2.2605	0.018641	-0.773619	0.584948
A0A1D6KWK2	100193634	A0A1D6KWK2;B6TLK1;A0A1D6FSJ2;A0A317YDB3;A0A3L6DIK1;A0A3L6EL67;B4FFR7;B6T1G6;B6TTC4;A0A1D6KWK0;B6T6E3;C4J151	28;28;28;28;28;28;28;28;28;28;28;28	A0A1D6KWK2	2.7e-23	114.61	1	S	QKIYPGKGIRFIRADSQVFLFANSKCKRYFH	X;X;X;X;X;X;X;X;X;X;X;X;X;X;X;Phospho (STY);X;X;X;X;X;X;X;X;X;X;X;X;X;X;X	XXXXXXXXXXXXXPPPPPPPPPPPPXXXXXX	ADS(1)QVFLFANSK	3	3	0.52844			216;217	216	1.48138	1.55615	1.58795	2.47359	2.49733	2.48581	8.1892e-06	-0.943757	0.519877
A0A1D6FSY6	100280058	A0A1D6FSY6;A0A1D6FSY5;A0A3L6DPL3;A0A1D6FSX9;A0A1D6FSX8;A0A1D6FSY0;B8A1N8	127;461;613;613;622;631;638	A0A1D6FSY6	9.47e-05	55.489	1	S	SVPTNGNSSQEKLIGSPDIRPKKLALKLAFT	X;X;X;X;X;X;X;X;X;X;X;X;X;X;X;Phospho (STY);X;X;X;X;X;X;X;X;X;X;X;X;X;X;X	XXXXXXXXXXXXPPPPPPPPPPXXXXXXXXX	LIGS(1)PDIRPK	4	3	0.75728			5512	5512	-1.7589	-1.38545	-1.43643	-0.24405	0.070713	-0.0330814	0.000613378	-1.45812	0.363967
A0A1D6FUN9	100383776	A0A1D6FUN9;A0A1D6FUN5;A0A1D6FUP1;A0A1D6FUN4;A0A1D6FUN7;A0A1D6FUN6;A0A3L6DPR9;A0A1D6FUN3;A0A1D6FUN1;A0A3L6DPH4;A0A1D6FUN2;A0A1D6FUN0	87;134;278;297;346;393;506;590;596;597;598;615	A0A1D6FUN9	8.33e-69	153.22	1	S	AKEAVGDLGCLVRQLSLDQFENESRRMHPSN	X;X;X;X;X;X;X;X;X;X;X;X;X;X;X;Phospho (STY);X;X;X;X;X;X;X;X;X;X;X;X;X;X;X	XXXXXXXXXXXXXPPPPPPPPPPPPXXXXXX	QLS(1)LDQFENESR	3	2	-0.75555			6750	6750	1.19117	1.30284	1.20709	1.92592	1.88933	2.08281	0.000441918	-0.732321	0.601935
C0PFY2	Zm00014a_031118	C0PFY2;A0A3L6DRA0;K7V5K6;A0A1D6FUW4	15;155;173;191	C0PFY2	5.65e-15	96.092	1	S	_MGSCDTYAEMSRANSLEVAVLKDRLVKLES	X;X;X;X;X;X;X;X;X;X;X;X;X;X;X;Phospho (STY);X;X;X;X;X;X;X;X;X;X;X;X;X;X;X	XXXXXXXXXXXXXPPPPPPPPPPXXXXXXXX	ANS(1)LEVAVLK	3	2	0.1631			644	644	0.00231721	0.0457751	-0.0896168	0.879955	0.7087	0.805461	0.000217594	-0.81188	0.569639
A0A1D6FW74	ZEAMMB73_Zm00001d011091	A0A1D6FW74;A0A1D6FW47;A0A1D6FW62;A0A1D6FW65;A0A1D6FW61;A0A1D6FW53;A0A1D6FW55;A0A1D6FW67;A0A1D6FW59;K7UYH4;A0A3L6DR88;A0A1D6FW35;A0A1D6FW36	145;145;6;145;700;280;307;506;700;700;700;700;712	A0A1D6FW74	0.00024635	47.043	1	S	SDALTVQRAFMSRAKSNASLGSKDHPYCTEV	X;X;X;X;X;X;X;X;X;X;X;X;X;X;X;Phospho (STY);X;X;X;X;X;X;X;X;X;X;X;X;X;X;X	XXXXXXXXXXXXXPPPPPPPPPPXXXXXXXX	AKS(0.995)NAS(0.004)LGS(0.001)K	3	3	0.3778			496	496	0.508298	0.100421	-0.212783	2.01926	2.11746	2.27924	0.000831179	-2.00668	0.248846
A0A1D6NLH1	100382448	A0A1D6NLH1;A0A3L6DRX2;A0A1D6NLG1;A0A1D6NLG8;A0A1D6NLG3;C0P7W3;A0A1D6FYM6;A0A1D6FYM9;A0A1D6NLG0;A0A1D6FYM7;A0A1D6FYM1;A0A1D6FYN2;K7VZ74;A0A1D6NLH4;K7V393;A0A1D6NLH2;A0A3L6FBH8	93;187;212;193;212;189;192;188;189;93;188;188;188;189;188;189;253	A0A1D6NLH1	0.000382051	43.591	1	S	MKRSQPKVLRLNLVGSPDKESKATCAVPPVL	X;X;X;X;X;X;X;X;X;X;X;X;X;X;X;Phospho (STY);X;X;X;X;X;X;X;X;X;X;X;X;X;X;X	XXXXXXXXXXPPPPPPPPPPPPXXXXXXXXX	LNLVGS(0.992)PDKES(0.008)K	6	3	0.24371			5683	5683	-0.327388	-0.750729	-0.715202	-0.123544	0.111951	0.096574	0.0157677	-0.6261	0.647925
B8A0C4	ZEAMMB73_Zm00001d011854	B8A0C4;K7VLK5;A0A1D6G4D3;A0A1D6G4I5;A0A3L6DLP6;A0A1D6G499;A0A1D6G496;A0A1D6G4D7;A0A1D6G4F8;A0A1D6G4G1;A0A1D6G4E1;A0A1D6G4C7;A0A1D6G4H3;A0A1D6G4B1;A0A1D6G4A7;A0A1D6G4E4;A0A1D6G4F0;A0A1D6G4G3;A0A1D6G4A8;A0A1D6G4C2;A0A1D6G4G6;A0A1D6G4I3;A0A1D6G4I6;A0A1D6G4I2;A0A1D6G4D5;A0A1D6G4E0;A0A1D6G4B8;A0A1D6G4B9	351;351;53;53;351;351;53;351;351;351;53;351;351;351;351;351;351;351;53;53;351;351;351;351;351;351;351;351	B8A0C4		321.27	1	S	FKSKFESWPVGNATGSPGAEEGRGKVAALLK	X;X;X;X;X;X;X;X;X;X;X;X;X;X;X;Phospho (STY);X;X;X;X;X;X;X;X;X;X;X;X;X;X;X	XXPPPPPPPPPPPPPPPPPPPPPPPXXXXXX	FESWPVGNAT(0.001)GS(0.999)PGAEEGR	12	2	-1.8494			2153;2154;7888;7889;7890;7891	2154	2.82004	2.88492	2.83213	3.80508	3.95034	3.91598	2.66746e-05	-1.04477	0.484721
C0PFI2		C0PFI2;K0DCM5;B6TK84;B4FIU7;A0A3L6DL57;A0A1D6G684;A0A1D6N386;A0A1D6N390;A0A1D6G688;A0A1D6N380;A0A1D6N378;A0A1D6G687;A0A1D6N388;A0A3L6FM34;B4FDH8;A0A1D6N385;A0A1D6N383;B4FIG9;A0A1D6N382	182;232;232;232;232;290;126;126;126;236;267;232;236;236;126;134;236;236;236	B4FDH8	0.00495557	52.22	1	S	GTMPSWAFPRASFIPSPRWQSPSNYAPMIVP;GTMSSWTFPRASFIPSPRWQSPSNYAPMVVP	X;X;X;X;X;X;X;X;X;X;X;X;X;X;X;Phospho (STY);X;X;X;X;X;X;X;X;X;X;X;X;X;X;X	XXXXXXXXXXPPPPPPPPXXXXXXXXXXXXX	ASFIPS(1)PR	6	2	-0.61975			885;886	885	-0.0299938	0.0442993	-0.0252243	0.498247	0.859616	0.630939	0.00352771	-0.666574	0.630001
A0A1D6GD41	100216842	A0A1D6GD41;B4FK00	141;141	A0A1D6GD41	1.64e-75	150.4	1	S	KEVAKSAITDNALPSSPVTASEASKPSDDFP	X;X;X;X;X;X;X;X;X;X;X;X;X;X;X;Phospho (STY);X;X;X;X;X;X;X;X;X;X;X;X;X;X;X	XXXXXPPPPPPPPPPPPPPPPPPPPPPPPPP	SAITDNALPS(0.015)S(0.983)PVT(0.002)ASEASKPSDDFPEFK	11	4	-0.58224			7407	7407	-0.195853	0.306809	0.0442687	1.97509	2.13553	1.91643	0.000251673	-1.95727	0.257515
A0A3L6EKB2	NAKR2_2	A0A3L6EKB2;A0A1D6GEC5;B6TXF1	95;95;96	A0A3L6EKB2	8.47e-17	43.388	1	S	GGLVSPAGSSRYLLLSGRFAAVAEEIQEVLE;GGLVSPAGSSRYLLLSGRFAAVAEETQEVLE	X;X;X;X;Phospho (STY);X;X;X;Phospho (STY);X;X;X;X;X;X;Phospho (STY);X;X;X;X;X;X;X;X;X;X;X;X;X;X;X	XXXXXXXXXXXPPPPPPPXXXXXXXXXXXXX	YLLLS(1)GR	5	2	0.16868			10339	10339	0.301569	0.521348	0.324193	1.56134	1.41659	1.52136	0.000168421	-1.11739	0.460926
A0A1D6GEX9	ZEAMMB73_Zm00001d013019	A0A1D6GEX9;A0A1D6L917;A0A1D6GEZ0;A0A1D6L934;B6U4D3;A0A1D6GEY0;A0A3L6EMW6;A0A1D6L913;A0A1D6L924;A0A1D6GEZ5;A0A1D6L916;A0A1D6L914;A0A1D6L931;A0A1D6L915;A0A1D6L920;A0A1D6GEZ2;A0A1D6GEZ3;A0A1D6L938;A0A1D6GEZ1;A0A1D6L918;A0A1D6L926;A0A1D6GEZ4;A0A317YAN9	73;73;73;73;73;73;73;73;73;73;73;73;73;73;73;73;73;73;73;73;73;73;73	A0A1D6GEX9	1.43e-27	123.81	1	S	ADYFPDRVPITIIDTSSSPEQKPKLIAECQA	X;X;X;X;X;X;X;X;X;X;X;X;X;X;X;Phospho (STY);X;X;X;X;X;X;X;X;X;X;X;X;X;X;X	PPPPPPPPPPPPPPPPPPPPPPPPXXXXXXX	LPADYFPDRVPITIIDT(0.032)S(0.785)S(0.153)S(0.03)PEQKPK	18	5	-0.70187			5712	5712	-1.84411	-2.20806	-1.80892	-1.04543	-0.234578	-0.916416	0.0123415	-1.22156	0.42882
A0A1D6GFZ7	541988	A0A1D6GFZ7;A0A1D6GFZ9;C0P4A7	135;124;135	A0A1D6GFZ7	3.08e-07	85.622	1	S	PSPSPRPRPQVKRVSSAGLLVGSVLRRKTEN	X;X;X;X;X;X;X;X;X;X;X;X;X;X;X;Phospho (STY);X;X;X;X;X;X;X;X;X;X;X;X;X;X;X	XXXXXXXXXXXXXPPPPPPPPPPPPPXXXXX	VS(0.148)S(0.852)AGLLVGSVLR	3	2	1.0697			9942	9942	-0.709575	-0.91105	-1.10884	0.383152	0.329558	0.341862	0.000411414	-1.26135	0.417154
A0A1D6GGE5	ZEAMMB73_Zm00001d013192	A0A1D6GGE5;A0A3L6EG62	700;700	A0A1D6GGE5	0.00371195	20.328	1	S	GVEEPERVSSMGRKVSFTMDDSRLCRNSDAG	X;X;X;X;X;X;X;X;X;X;X;X;X;X;X;Phospho (STY);X;X;X;X;X;X;X;X;X;X;X;X;X;X;X	XXXXXXXXXXXXXPPPPPPPPPPXXXXXXXX	KVS(0.897)FT(0.103)MDDSR	3	3	-0.90133			5174	5174	-1.08042	-0.983598	-1.47204	-0.666543	-0.609891	-0.451561	0.0207101	-0.602687	0.658526
A0A1D6GGV9	103625877	A0A1D6GGV9;A0A1D6GGV6;A0A1D6GGV7;A0A1D6GGV8;A0A1D6GGV5;A0A1D6GGV4;A0A3L6EQR8	415;415;415;415;415;415;894	A0A1D6GGV9	0.00686803	41.21	1	S	SHLAEEYTEKLKHVFSLGKSLRPPKKKLLIL	X;X;X;X;X;X;X;X;X;X;X;X;X;X;X;Phospho (STY);X;X;X;X;X;X;X;X;X;X;X;X;X;X;X	XXXXXXXXXXXXPPPPPPPXXXXXXXXXXXX	HVFS(1)LGK	4	3	0.57635			4024	4024	-2.85124	-2.70239	-2.87555	-2.20561	-2.12762	-1.78899	0.00519706	-0.768988	0.586829
Q9ZQX9	103625888	Q9ZQX9;A0A1D6GHT6;B6TUY0;B6TFY4;A0A3L6EHB8	80;112;46;80;129	Q9ZQX9	0.00158578	40.243	1	S	LCQPTGGKARLTEGCSFRRKGD_________	X;X;X;X;X;X;X;X;X;X;X;X;X;X;X;Phospho (STY);X;X;X;X;X;X;X;X;X;X;X;X;X;X;X	XXXXXXXXXXPPPPPPPPXXXXXXXXXXXXX	LTEGCS(1)FR	6	2	-0.20006			5953	5953	-0.791155	-0.646521	-0.467952	0.253454	-0.133847	-0.102701	0.0145892	-0.640845	0.641337
C0PNH9	100384338	C0PNH9;A0A1D6GI98;C4J3J8;A0A1D6GI96;C0HFQ0;A0A3L6EJD0	100;125;145;199;199;199	C0PNH9	0.000506526	49.556	1	S	TFFNPASAKVFSRFDSLKEAVKNYTIEATPD	X;X;X;X;X;X;X;X;X;X;X;X;X;X;X;Phospho (STY);X;X;X;X;X;X;X;X;X;X;X;X;X;X;X	XXXXXXXXXXXXXPPPPPPPPPXXXXXXXXX	FDS(1)LKEAVK	3	3	0.0028816			2114;2115	2115	1.4847	1.50425	1.48262	2.29846	2.3135	2.31975	1.01284e-07	-0.820046	0.566424
A0A1D6GIQ9	100279338	A0A1D6GIQ9;B7ZXM2;A0A1D6GIQ5;A0A1D6GIQ8;A0A1D6GIQ3;A0A1D6GIQ7;A0A1D6GIN6;A0A1D6L2Q2;A0A317YED4;A0A1D6L2Q1;A0A1D6L2Q3;A0A3L6EYZ6	124;222;321;276;321;321;321;321;335;335;321;298	A0A1D6GIQ9	0.000187141	55.926	1	S	AATPAAAPEKTSRAGSFSFKSGPPKLELQMG;APAPAAAPEKTSRAGSFSFKSGPPKLELQMG	X;X;X;X;X;X;X;X;X;X;X;X;X;X;X;Phospho (STY);X;X;X;X;X;X;X;X;X;X;X;X;X;X;X	XXXXXXXXXXXXXPPPPPPPXXXXXXXXXXX	AGS(0.97)FS(0.03)FK	3	2	0.10882			354;355;356	356	2.7752	2.79777	2.71486	3.5977	3.56586	3.64229	1.45769e-05	-0.839336	0.558901
A0A1D6GJT2	100381915	A0A1D6GJT2;A0A1D6L1H6;A0A1D6L1H8;A0A1D6GJR2;A0A1D6GJS3;A0A1D6L1I7;A0A1D6GJS5;A0A1D6GJS2;A0A1D6L1I1;A0A1D6GJT0;Q8SA94;A0A1D6GJR5;A0A1D6GJT1;A0A1D6GJT3;A0A1D6L1H7;A0A1D6GJS7;A0A1D6GJR1;A0A1D6GJS4;A0A3L6ESU9;A0A1D6GJQ9;A0A317YEC4	81;261;364;365;365;364;365;365;364;365;394;264;388;365;364;365;81;365;81;64;364	A0A1D6GJT2	5.01e-85	144.92	1	S	EANLYFDTRDFLSSSSFKSSGSDFQRSEAGS	X;X;X;X;X;X;X;X;X;X;X;X;X;X;X;Phospho (STY);X;X;X;X;X;X;X;X;X;X;X;X;X;X;X	XXXXXXXXXPPPPPPPPPXXXXXXXXXXXXX	DFLSSS(0.046)S(0.954)FK	7	2	-1.5156			1335	1335	1.6707	1.80147	1.63021	2.36271	2.51315	2.50361	0.000432847	-0.759033	0.590892
A0A1D6GMM3	ZEAMMB73_Zm00001d013836	A0A1D6GMM3;A0A3L6EIL4;A0A1D6GMK9;A0A1D6GML5;A0A1D6GML3;A0A1D6GML8;A0A1D6GML6;A0A1D6GML4;A0A1D6GMM0;A0A1D6KQM9;A0A1D6GML9;A0A1D6GMM1;A0A1D6KQN7;A0A1D6KQP3;A0A1D6JL65;A0A1D6JL63;A0A1D6JL62;A0A1D6JL61;A0A1D6JL60;A0A317Y9K8;B6U6J4;A0A1D6JL64;A0A1D6JL66;A0A1D6KQN2;A0A1D6KQN8;A0A1D6KQN9;A0A1D6KQN5;A0A1D6KQP2;A0A1D6KQP1;A0A1D6KQP6;A0A1D6KQN4;A0A1D6KQP5;A0A1D6KQP4;B4FBG9;A0A1D6KQN0	351;351;351;351;351;83;152;19;172;351;351;351;317;351;347;347;347;347;347;347;347;347;347;19;52;83;351;351;351;351;317;351;351;351;351	A0A1D6JL65	1.29e-23	82.302	1	S	SEQEALSLSEYQRGVSAWNFDIEDLKAQASL;SEQEALSMSEYQRGVSAWNFDIEDLKAQASL	X;X;X;X;X;X;X;X;X;X;X;X;X;X;X;Phospho (STY);X;X;X;X;X;X;X;X;X;X;X;X;X;X;X	XXXXXXXXXXXXXPPPPPPPPPPPPPXXXXX	GVS(1)AWNFDIEDLK	3	3	0.71867			3727;3728	3728	0.441024	0.603192	0.447072	1.08877	1.06091	1.29971	0.00210131	-0.652703	0.636087
A0A1D6GNM3	103626132	A0A1D6GNM3;A0A1D6GNM1;A0A1D6GNM5;A0A3L6EJP3;A0A1D6GNM0	298;298;298;298;298	A0A1D6GNM3	0.00110261	43.646	1	S	SVDMGNMKVGMARQSSDVLFKRNSAEQSSLK	X;X;X;X;X;X;X;X;X;X;X;X;X;X;X;Phospho (STY);X;X;X;X;X;X;X;X;X;X;X;X;X;X;X	XXXXXXXXXXXXXPPPPPPPPXXXXXXXXXX	QS(0.018)S(0.982)DVLFK	3	2	0.31224			6851	6851	-0.281808	-0.138116	-0.100343	0.570198	0.29515	0.74314	0.00744416	-0.709585	0.611496
B7ZY05	ZEAMMB73_Zm00001d013967	B7ZY05;A0A1D6GNZ2;A0A317YEI2;A0A1D6KSI2;A0A1D6GNZ0;A0A1D6KSG7;A0A1D6GNX9;A0A1D6GNY0;A0A1D6KSF2;A0A1D6KSF1;A0A1D6GP00;A0A1D6KSG1;A0A1D6KSF9;A0A1D6KSG4;A0A1D6GNY3;A0A1D6KSG8;A0A1D6GNZ7;A0A1D6GNY5;A0A1D6GP01;A0A1D6GNY9;A0A1D6KSH7;A0A1D6KSG5;A0A1D6GNZ8;A0A1D6KSH6;A0A1D6GNZ9;A0A1D6KSH3;C0HH46;A0A1D6GNZ1;Q9XFK8;A0A3L6ETA0	39;752;1046;1046;1033;1029;1021;999;981;951;851;850;844;209;844;751;496;465;449;447;435;435;436;430;431;358;311;1050;954;1021	B7ZY05	2.92e-06	73.722	1	S	EEMWQKQMRSLQSSLSVAKKSLVLDETPRMS	X;X;X;X;X;X;X;X;X;X;X;X;X;X;X;Phospho (STY);X;X;X;X;X;X;X;X;X;X;X;X;X;X;X	XXXXXXXXXPPPPPPPPPPXXXXXXXXXXXX	SLQSSLS(1)VAK	7	2	0.36021			8021	8021	0.0624369	-0.189282	-0.261081	0.606675	0.501239	0.587297	0.0025508	-0.694379	0.617975
A0A1D6GRK0	ZEAMMB73_Zm00001d014280	A0A1D6GRK0;A0A1D6GRJ9;A0A1D6GRJ8;A0A3L6EQR3	225;552;627;594	A0A1D6GRK0	0.00117899	30.999	1	S	SKSYASDLEPHAGFISPAIRDNGSDAYNRQR	X;X;X;X;X;X;X;X;X;X;X;X;X;X;X;Phospho (STY);X;X;X;X;X;X;X;X;X;X;X;X;X;X;X	XXPPPPPPPPPPPPPPPPPPXXXXXXXXXXX	S(0.001)Y(0.001)AS(0.001)DLEPHAGFIS(0.998)PAIR	14	3	-0.67501			8748	8748	0.769701	0.877163	1.05046	1.66439	1.74798	1.69431	0.000711421	-0.803118	0.573109
A0A1D6KCM4	100501241	A0A1D6KCM4;A0A1D6GRQ2;A0A1D6KCS0;A0A1D6KCM8;A0A1D6KCR9;A0A1D6KCR0;A0A1D6KCQ9;A0A1D6KCS2;A0A1D6GRN7;A0A1D6KCQ4;A0A1D6GRL1;A0A1D6KCS3;A0A1D6GRP1;A0A1D6GRP2;A0A1D6KCM3;A0A317YD53;A0A1D6KCR2;A0A1D6GRK6;A0A1D6KCR5;A0A3L6EGU7;A0A1D6GRK7;A0A1D6KCM2;A0A1D6KCT0;A0A1D6GRK9;A0A1D6KCR8;A0A1D6GRP7;A0A1D6GRN5;A0A1D6GRL0;A0A1D6KCP8;A0A1D6KCN7;A0A1D6KCM5;A0A317YC66;A0A1D6GRL3;A0A1D6KCQ1;A0A1D6KCS8;A0A1D6GRN4;A0A…	444;253;259;284;289;285;284;285;341;341;366;253;367;371;369;369;369;373;373;374;374;388;368;252;206;224;163;163;173;197;197;249;217;211;248;217;224;230;240;242;246;248;246;163;173	A0A1D6KCM4	2.14e-143	205.73	1	S	LEEAAIGYPFLKTQSSNLSDILKDSFKKTDS	X;X;X;X;X;X;X;X;X;X;X;X;X;X;X;Phospho (STY);X;X;X;X;X;X;X;X;X;X;X;X;X;X;Phospho (STY)	XXXXXXXXXXXXPPPPPPPPPPPXXXXXXXX	TQS(0.012)S(0.988)NLSDILK	4	2	2.6168			9275	9275	1.20698	1.14819	1.04007	2.23357	2.26854	2.37382	5.62958e-05	-1.16023	0.447441
A0A1D6KCM4	100501241	A0A1D6KCM4;A0A1D6GRQ2;A0A1D6KCS0;A0A1D6KCM8;A0A1D6KCR9;A0A1D6KCR0;A0A1D6KCQ9;A0A1D6KCS2;A0A1D6GRN7;A0A1D6KCQ4;A0A1D6GRL1;A0A1D6KCS3;A0A1D6GRP1;A0A1D6GRP2;A0A1D6KCM3;A0A317YD53;A0A1D6KCR2;A0A1D6GRK6;A0A1D6KCR5;A0A3L6EGU7;A0A1D6GRK7;A0A1D6KCM2;A0A1D6KCT0;A0A1D6GRK9;A0A1D6KCR8;A0A1D6GRP7;A0A1D6GRN5;A0A1D6GRL0;A0A1D6KCP8;A0A1D6KCN7;A0A1D6KCM5;A0A317YC66;A0A1D6GRL3;A0A1D6KCQ1;A0A1D6KCS8;A0A1D6GRN4;A0A…	453;262;268;293;298;294;293;294;350;350;375;262;376;380;378;378;378;382;382;383;383;397;377;261;215;233;172;172;182;206;206;258;226;220;257;226;233;239;249;251;255;257;255;172;182	A0A1D6KCM4	9.14e-14	99.238	1	S	FLKTQSSNLSDILKDSFKKTDSFTRWMSKEL	X;X;X;X;X;X;Phospho (STY);X;X;X;X;X;X;X;X;Phospho (STY);X;X;X;X;X;Phospho (STY);X;X;X;X;X;X;X;X;X	XXXPPPPPPPPPPPPPPPPXXXXXXXXXXXX	TQSSNLS(0.001)DILKDS(0.999)FKK	13	4	-0.34382			9277	9277	0.855256	0.768794	0.765387	1.3586	1.32124	1.51342	0.000794562	-0.601275	0.659171
A0A1D6GSV7	100304255	A0A1D6GSV7;C0HE50;A0A3L6ESR2	194;194;194	A0A1D6GSV7	0.00277484	15.298	1	S	SVPGNRKNRSLRRADSLGVIRVIPTTPRPVP	X;X;X;X;X;X;X;X;X;X;X;X;X;X;X;Phospho (STY);X;X;X;X;X;X;X;X;X;X;X;X;X;X;X	XXXXXXXXXXXXPPPPPPPPPXXXXXXXXXX	RADS(1)LGVIR	4	3	0.25387			6912;6913	6913	-0.654929	-0.735832	-0.783757	0.286988	0.125497	0.250312	0.000105413	-0.945772	0.519152
C0HF50		C0HF50;C0HEV3;C0HFL2;A0A3L6EJ97;A0A3L6F4U8;A0A3L6ELE3;A0A1D6GUT5;A0A1X7YHN2	79;196;645;645;650;650;650;650	C0HF50	0.00191661	41.181	1	S	NTLFLSKPGRPMRAGSFQIKNSNDKITSAMT	X;X;X;X;X;X;X;X;X;X;X;X;X;X;X;Phospho (STY);X;X;X;X;X;X;X;X;X;X;X;X;X;X;X	XXXXXXXXXXXXXPPPPPPPXXXXXXXXXXX	AGS(1)FQIK	3	2	0.60167			353	353	-0.330426	-0.12721	-0.434141	0.263274	0.568695	0.540899	0.00472722	-0.754882	0.592595
A0A1D6GVS8	100285952	A0A1D6GVS8;A0A1D6GVT4;A0A1D6GVT3;B6UC79;B8A168;A0A1D6GVS9;C4J0T8;A0A1D6LNA4;A0A1D6LNA3;A0A1D6GVT5;A0A1D6LNA5;A0A1D6LNA2;A0A1D6LNA1;B7ZZV1;A0A1D6LN96;A0A1D6LN97;A0A1D6LN88;A0A3L6GCB1;A0A1D6IHV2;A0A1D6K690;A0A3L6FGT3;A0A317Y9K6;A0A317Y550;A0A3L6EZY4;A0A1D6PP77;A0A1D6IMH5;A0A3L6E440;A0A3L6G752;A0A1D6IHV1;B4FAT1;B4F8S8;A0A1D6MDU6;A0A3L6E9K3	399;413;477;477;477;477;419;413;399;49;476;399;413;476;476;142;142;253;68;68;501;188;189;243;441;479;369;465;68;410;410;442;775	A0A1D6GVS8	0.0003422	59.874	1	S	SGGNGPSVPTDRKHASLPRTTVVHSNPIPAK;YSKGERGSPLQRKHASLPRERVVVSKDGNTE	X;X;X;X;X;X;X;X;X;X;X;X;X;X;X;Phospho (STY);X;X;X;X;X;X;X;X;X;X;X;X;X;X;X	XXXXXXXXXXXXPPPPPPPXXXXXXXXXXXX	KHAS(1)LPR	4	3	0.041589			4816;4817	4816	0.622384	0.524292	0.666764	1.86845	2.13148	1.94616	0.000100123	-1.37755	0.384873
A0A1D6GVS8	100285952	A0A1D6GVS8;A0A1D6GVT4;A0A1D6GVT3;B6UC79;B8A168;A0A1D6GVS9;A0A3L6ELA8;C4J0T8;A0A1D6LNA4;A0A1D6LNA3;A0A1D6GVT1;A0A1D6GVT5;A0A1D6LNA5;A0A1D6LNA2;A0A1D6LNA1;B7ZZV1;A0A1D6GVT0;A0A1D6LN96;A0A1D6LN95;A0A1D6LN93;A0A1D6LN98;A0A1D6LNA6;A0A3L6E717;A0A1D6LN92;A0A1D6LN97;A0A1D6LN88	460;474;538;538;538;538;504;480;474;460;504;110;537;460;474;537;504;537;457;503;503;457;457;457;203;203	A0A1D6GVS8	3.27e-10	63.422	1	S	VKPTSLSSRSYLKSASISASKCVVVRNKHPE	X;X;X;X;X;X;X;X;X;X;X;X;X;X;X;Phospho (STY);X;X;X;X;X;X;X;X;X;X;X;X;X;X;X	XXXXXXXXXXXXXPPPPPPPPXXXXXXXXXX	S(0.056)AS(0.867)IS(0.056)AS(0.021)K	3	2	-0.16246			7495;7496	7496	1.45262	1.33887	1.34087	2.08399	2.01542	2.03536	9.82587e-05	-0.667473	0.629609
C4J5W7	ZEAMMB73_Zm00001d014753	C4J5W7;B6SYN9;A0A1D6GW41;A0A1D6GW42	106;106;106;106	C4J5W7	3.18e-08	75.75	1	S	GEREESRAVNSGYPASPPRPGPRPTHAAQNG	X;X;X;X;X;X;X;X;X;X;X;X;X;X;X;Phospho (STY);X;X;X;X;X;X;X;X;X;X;X;X;X;X;X	XXXXXXXPPPPPPPPPPPPPPPPXXXXXXXX	AVNSGYPAS(1)PPRPGPR	9	3	-0.63079			1207;1208	1208	-0.131655	0.0853186	-0.00925811	0.744224	0.364803	0.733578	0.0105723	-0.632733	0.644954
A0A1D6GWZ6	542027	A0A1D6GWZ6;A0A1D6GWZ7;A0A3L6FDL3;A0A1D6Q051;A0A1D6GQ28;A0A3L6EKI4;A0A1D6GWZ8	12;12;12;12;12;12;12	A0A1D6GWZ6	9.34e-37	141.05	1	S	____MASKLSFKRADSIAESMPDALRQSRYQ	X;X;X;X;X;X;X;X;X;Phospho (STY);X;X;X;X;X;Phospho (STY);X;X;X;X;Oxidation (M);X;X;X;X;X;X;X;X;X;X	XXXXXXXXXXXXPPPPPPPPPPPPPPXXXXX	RADS(1)IAESMPDALR	4	3	-0.65243			6906;6907;6908;6909;6910;6911	6909	0.869071	0.719957	0.753019	1.41724	1.63905	1.45016	0.000945834	-0.721469	0.60648
A0A1D6GWZ6	542027	A0A1D6GWZ6;A0A1D6GWZ7;A0A3L6FDL3;A0A1D6Q051;A0A1D6GQ28;A0A3L6EKI4;A0A1D6GWZ8	16;16;16;16;16;16;16	A0A1D6GWZ6	6.29e-05	56.98	1	S	MASKLSFKRADSIAESMPDALRQSRYQMKKC	X;X;X;X;X;Phospho (STY);X;X;X;X;X;X;X;X;X;Phospho (STY);Oxidation (M);X;X;X;X;X;X;X;X;X;X;X;X;X;X	XXXXXXXXXPPPPPPPPPPPPPXXXXXXXXX	ADS(0.009)IAES(0.991)MPDALR	7	2	-0.89362			212;213	213	0.309852	0.449252	0.359634	1.28168	1.28146	1.44618	0.000147112	-0.963527	0.512802
A0A1D6GWZ6	542027	A0A1D6GWZ6;A0A1D6GWZ7;A0A3L6FDL3;A0A1D6Q051;A0A1D6GQ28;A0A3L6EKI4;A0A1D6GWZ8	6;6;6;6;6;6;6	A0A1D6GWZ6	0.0108025	12.036	1	S	__________MASKLSFKRADSIAESMPDAL	X;X;X;X;X;X;X;X;X;X;X;X;X;X;X;Phospho (STY);X;X;X;X;X;Phospho (STY);X;X;X;Phospho (STY);Oxidation (M);X;X;X;X	XXXXXXXXXXXPPPPPPPXXXXXXXXXXXXX	AS(0.002)KLS(0.998)FK	5	3	-0.92834			908	908	-1.86134	-2.38716	-2.58684	-1.43938	-0.781901	-1.27137	0.0190069	-1.11423	0.461938
A0A1D6GWZ6	542027	A0A1D6GWZ6;A0A1D6GWZ7	856;858	A0A1D6GWZ6	2.38e-06	75.727	1	S	IQRIMTSLMGQKPATSE______________	X;X;X;X;Oxidation (M);X;X;X;Oxidation (M);X;X;X;X;X;X;Phospho (STY);X;X;X;X;X;X;X;X;X;X;X;X;X;X;X	XXXPPPPPPPPPPPPPPXXXXXXXXXXXXXX	IMTSLMGQKPAT(0.14)S(0.86)E	13	3	0.0014835			4293	4293	-1.38766	-1.29549	-1.40726	-0.626324	-0.323866	-0.518474	0.000774855	-0.873914	0.545665
A0A1D6GXI8	103626494	A0A1D6GXI8;A0A1D6GXH8;A0A1D6GXI3;A0A1D6GXI1;A0A3L6ESL3;Q6QJ78;B6SKE7;A0A3L6EUF4;A0A1D6GXI7;A0A1D6GXH6;A0A1D6GXI4;B4FY17	173;173;351;351;351;351;351;351;351;351;351;351	A0A1D6GXI8	0.00125396	30.067	1	S	LRDALKVDPDKVRRLSLSETQLAKATISHGA	X;X;X;X;X;X;X;X;X;X;X;X;X;X;X;Phospho (STY);X;X;X;X;X;X;X;X;X;X;X;X;X;X;X	XXXXXXXXXXXXXPPPPPPPPPPPXXXXXXX	RLS(0.951)LS(0.046)ET(0.002)QLAK	3	3	0.13801			7103	7103	-1.41859	-1.30123	-1.35798	-0.664729	-0.785611	-0.708223	0.00019812	-0.639746	0.641826
A0A1D6GXL7	100281652	A0A1D6GXL7;A0A1D6GXM2;A0A3L6EKR2;A0A1D6GXL1;A0A1D6GXM0;A0A1D6GXM1;A0A1D6GXM7;A0A1D6GXK7;B6SXI7	154;304;304;304;304;304;304;304;301	A0A1D6GXL7	0.000278293	44.963	1	S	FEKTRSTNVLLERRWSLGVAIEKFLGRETNE	X;X;X;X;X;X;X;X;X;X;X;X;X;X;X;Phospho (STY);X;X;X;X;X;X;X;X;X;X;X;X;X;X;X	XXXXXXXXXXXXXPPPPPPPPPPXXXXXXXX	RWS(1)LGVAIEK	3	3	-0.15012			7363	7363	-1.54804	-1.12374	-1.53534	-0.647927	-0.469345	-0.424706	0.00460564	-0.888379	0.540221
A0A1D6GZL9	103626575	A0A1D6GZL9;A0A1D6GZL8;A0A1D6GZL4;A0A1D6GZK8;A0A1D6GZK7;A0A1D6GZK0;A0A1D6GZK9;A0A1D6GZK5;A0A1D6GZL0;A0A1D6GZL1;A0A1D6GZK2;A0A1D6GZL2;A0A1D6GZK3	182;237;358;450;576;585;646;800;802;804;813;830;837	A0A1D6GZL9	4.64e-49	143.11	1	S	KPNTAENPSSSNAVPSPVRTTDSDSRKHASF	X;X;X;X;X;X;X;X;X;X;X;X;X;X;X;Phospho (STY);X;X;X;X;X;X;X;X;X;X;X;X;X;X;X	PPPPPPPPPPPPPPPPPPPXXXXXXXXXXXX	VVDAAAATAAKPNTAENPSSS(0.006)NAVPS(0.994)PVR	26	4	1.4807			10070;10071	10071	-0.282211	-0.385581	-0.247082	0.431828	0.586959	0.534522	0.000182553	-0.822727	0.565372
A0A1D6H1H4	100285337	A0A1D6H1H4;B6U3W2;A0A3L6ESE8	51;51;51	A0A1D6H1H4	0.00021722	49.449	2	S	ATNTTNSAKSLGKRLSHLDSIPHTPRVNGKI	X;X;X;X;X;X;X;X;X;X;X;X;X;X;X;Phospho (STY);X;X;X;Phospho (STY);X;X;X;X;X;X;X;X;X;X;X	XXXXXXXXXXXXXPPPPPPPPPPPPPXXXXX	RLS(1)HLDS(0.938)IPHT(0.062)PR	3	3	1.3434			7100	7100	-2.10808	-2.12696	-2.63437	-1.61149	-1.7305	-1.61276	0.0225721	-0.638219	0.642506
B4FGV4	100193950	B4FGV4;A0A1D6H3D2;A0A1D6H3D0;A0A1D6H3C8;A0A3L6EGG9;A0A1D6H3C9	187;297;580;951;973;973	B4FGV4	0.000109906	84.239	1	S	HQELTSIRLVETALDSKLRTTTYGKRLRDNE	X;X;X;X;X;X;X;X;X;X;X;X;X;X;X;Phospho (STY);X;X;X;X;X;X;X;X;X;X;X;X;X;X;X	XXXXXXXXPPPPPPPPPPPXXXXXXXXXXXX	LVETALDS(1)KLR	8	3	-0.28995			6010	6010	-0.856956	-0.922549	-1.20913	0.182895	0.628579	0.462724	0.00109851	-1.42094	0.373468
A0A1D6H4I9	103626876	A0A1D6H4I9;A0A1D6H4I8;A0A3L6ELF5;A0A1D6H4I5	131;472;479;479	A0A1D6H4I9	1.77e-22	101	1	S	EPAFLQGQSRFSIDMSPVKIFKNPEGSLSRA	X;X;X;X;X;X;X;X;X;X;X;X;X;X;Oxidation (M);Phospho (STY);X;X;X;X;X;X;X;X;X;X;X;X;X;X;X	XXXXXXXXXXPPPPPPPPPXXXXXXXXXXXX	FSIDMS(1)PVK	6	3	-0.37035			2316;2317;2318;2319	2319	2.56868	2.65229	2.52349	3.17113	3.34877	3.29334	0.000436971	-0.689594	0.620028
A0A1D6H4I9	103626876	A0A1D6H4I9;A0A1D6H4I8;A0A3L6ELF5;A0A1D6H4I5	67;408;415;415	A0A1D6H4I9	0.00047147	51.296	1	S	DEAAPTSRRPLKRMSSPERWEAKQLIASGVL	X;X;X;X;X;X;X;X;X;X;X;X;X;Oxidation (M);X;Phospho (STY);X;X;X;X;X;X;X;X;X;X;X;X;X;X;X	XXXXXXXXXXXXXPPPPPPPPPPXXXXXXXX	MS(0.142)S(0.858)PERWEAK	3	3	-0.18295			6247;6248	6247	-0.22793	-0.187933	-0.430021	0.427712	0.903832	0.526388	0.00526051	-0.901272	0.535414
A0A3L6EZW1	ACS_1	A0A3L6EZW1;A0A1D6H9J3	23;23	A0A3L6EZW1	2.51e-11	80.673	1	S	QPAEGAPSDKLRHVESMSELPSGAGKISGIN	X;X;X;X;X;X;X;X;X;X;X;X;X;X;X;Phospho (STY);Oxidation (M);X;X;X;X;X;X;X;X;X;X;X;X;X;X	XXXXXXXXXXXXPPPPPPPPPPPPPPXXXXX	HVES(0.99)MS(0.01)ELPSGAGK	4	3	0.70238			4019;4020;4021;4022	4019	1.22296	1.41151	1.49085	2.08021	2.39266	2.22743	0.0020364	-0.858326	0.551592
A0A3L6EIV5	CLC-C_2	A0A3L6EIV5;A0A1D6HAT5;A0A1D6HAT6;Q84QC8;A0A1D6HAT7;A0A1D6HAT8;A0A1D6HAU4;A0A1D6HAT9;A0A1D6HAU0;A0A1D6HAU2	697;698;713;671;348;392;281;348;396;458	A0A3L6EIV5	5.2e-11	75.479	1	S	LNSKNFMKGRVKTSGSFVLRRFGAFDFAKPG	X;X;X;X;X;X;X;X;X;X;X;X;X;X;X;Phospho (STY);X;X;X;X;X;X;X;X;X;X;X;X;X;X;X	XXXXXXXXXXXXPPPPPPPPXXXXXXXXXXX	TSGS(1)FVLR	4	2	-0.14695			9303;9304	9304	1.24564	1.23861	1.14155	1.86099	1.7276	1.84347	0.00035932	-0.602091	0.658798
A0A3L6EIV5	CLC-C_2	A0A3L6EIV5;A0A1D6HAT5;A0A1D6HAT6	61;62;62	A0A3L6EIV5	1.46e-89	154.69	1	S	SEALLRYDDGGADRGSTQQPLLRKRTVNTTS	X;X;X;X;X;X;X;X;X;X;X;X;X;X;X;Phospho (STY);X;X;X;X;X;X;X;X;X;Phospho (STY);X;X;X;X;X	XXXXXXPPPPPPPPPPPPPPPPPXXXXXXXX	YDDGGADRGS(0.822)T(0.178)QQPLLR	10	3	0.13658			10254;10255	10255	0.521306	0.644667	0.755413	1.63284	1.26687	1.27555	0.00556182	-0.751293	0.594071
A0A1D6HB21	ZEAMMB73_Zm00001d016898	A0A1D6HB21	235	A0A1D6HB21	0.0127188	18.086	1	S	RPMPTTRAGAGGGTASPRWNLGGGGGDSKES	X;X;X;X;X;X;X;X;X;X;X;X;X;X;X;Phospho (STY);X;X;X;X;X;X;X;X;X;X;X;X;X;X;X	XXXXXXXPPPPPPPPPPPXXXXXXXXXXXXX	AGAGGGT(0.023)AS(0.977)PR	9	2	1.0936			312	312	-3.89853	-3.08665	-3.73912	-2.97228	-2.17604	-2.45447	0.0378943	-1.0405	0.486158
A0A1D6HMV4	103627843	A0A1D6HMV4;A0A1D6HMV3;A0A1D6HMV0;A0A1D6HMV2;A0A1D6HMV1;A0A3L6EUP5	102;102;102;102;102;109	A0A1D6HMV4	2.2e-05	69.705	1;2	S	LGPSTSKYSLLDLGRSGLGSDLKLPLLSDKA	X;X;X;Phospho (STY);X;X;X;X;Phospho (STY);X;X;X;X;X;X;Phospho (STY);X;X;X;Phospho (STY);X;X;X;X;X;X;X;X;X;X;X	XXXXXXXPPPPPPPPPPPPPPPPPPPPPPPX	S(1)GLGS(1)DLKLPLLSDK	1	3	0.51846			7733;10383	7733	0.493667	0.57494	0.55627	1.6342	0.99459	1.71208	0.0166787	-0.905332	0.53391
A0A1D6HMV4	103627843	A0A1D6HMV4;A0A1D6HMV3;A0A1D6HMV0;A0A1D6HMV2;A0A1D6HMV1;A0A3L6EUP5	106;106;106;106;106;113	A0A1D6HMV4	2.2e-05	69.705	1;2	S	TSKYSLLDLGRSGLGSDLKLPLLSDKADGKQ	X;X;X;X;Phospho (STY);X;X;X;X;X;X;Phospho (STY);X;X;X;Phospho (STY);X;X;X;X;X;X;X;X;X;X;X;X;X;X;X	XXXXXXXXXXXPPPPPPPPPPPPPPPXXXXX	S(1)GLGS(1)DLKLPLLSDK	5	3	0.51846			7730;7731;7732;7733	7733	1.10511	1.21889	1.2267	2.44831	1.99635	2.49365	0.00230763	-1.1292	0.457169
A0A1D6HN32	103627850	A0A1D6HN32;A0A1D6HN30;A0A1D6HN31;A0A1D6HN35;A0A1D6HN34;A0A1D6HN33;A0A3L6ETJ0	1039;1111;1111;623;951;951;1111	A0A1D6HN32	1.14e-35	129.26	1	S	GTPKPDASIASRGHLSVSDLLDYINPDDELK	X;X;X;X;X;X;X;X;X;X;X;X;X;X;X;Phospho (STY);X;X;X;X;X;X;X;X;X;X;X;X;X;X;X	XXXXXXXXXXXXPPPPPPPPPPPPPPPPPPP	GHLS(0.975)VS(0.025)DLLDYINPDDELK	4	3	-1.4136			3354	3354	-1.35077	-1.39788	-1.63298	-0.693006	-0.834315	-0.654043	0.00205923	-0.733422	0.601475
A0A1D6HSC0	103631942	A0A1D6HSC0;A0A1D6HS76;A0A1D6HSA3;A0A1D6HS91;A0A1D6HSB0;A0A1D6HS64;A0A1D6HS96;A0A1D6HSA6;A0A1D6HS87	59;59;59;59;59;59;59;59;59	A0A1D6HSC0	0.00754692	16.477	1	S	PAEVGVPRSSLMKSTSSLNASSATRRSSTGT	X;X;X;X;X;X;X;X;X;X;X;X;X;X;X;Phospho (STY);X;X;X;X;X;X;X;X;X;X;X;X;X;X;X	XXXXXXXXXXXXXPPPPPPPPPPPPXXXXXX	S(0.023)T(0.023)S(0.84)S(0.065)LNAS(0.016)S(0.016)AT(0.016)R	3	2	-1.865			8622	8622	-3.4253	-2.67076	-2.90995	-0.726474	-1.01306	-0.862242	0.000848224	-2.13474	0.227708
A0A1D6HTM3	103632020	A0A1D6HTM3	70	A0A1D6HTM3	8.96e-52	148.88	1	S	KAPASSYMGDIDLPPSDDEDQEEAQLAAAKP	X;X;X;X;X;X;X;Oxidation (M);X;X;X;X;X;X;X;Phospho (STY);X;X;X;X;X;X;X;X;X;X;X;X;X;X;X	XPPPPPPPPPPPPPPPPPPPPPPPPPPPPPP	APASSYMGDIDLPPS(1)DDEDQEEAQLAAAK	15	3	1.669			656;657;658;659;660;661;662	656	2.34347	2.31866	2.42332	2.74658	3.03112	3.10411	0.00619722	-0.598785	0.66031
A0A1D6HW11	103632124	A0A1D6HW11;A0A3L6DZ87	74;74	A0A1D6HW11	8.99e-34	99.338	1	S	GETDRHDAVLVPRSASAAAALSAGQGSAATV	X;X;X;X;X;X;X;X;X;X;X;X;X;X;X;Phospho (STY);X;X;X;X;X;X;X;X;X;X;X;X;X;X;X	XXXXXXXXXXXXXPPPPPPPPPPPPPPPPPP	S(0.11)AS(0.89)AAAALSAGQGSAATVVK	3	2	-1.0259			7472;7473	7473	-1.44576	-1.1405	-1.37451	0.75578	0.769818	0.719715	2.45989e-05	-2.0687	0.238375
A0A1D6HXX4	ZEAMMB73_Zm00001d019501	A0A1D6HXX4;A0A1D6HXX3;A0A1D6HXY0;A0A1D6HXX8;A0A3L6D8G8	1192;1273;522;978;959	A0A1D6HXX4	6.09e-26	117.21	1	S	EANINAPKEVIEVENSEPEDGWQPVQRPKSA	X;X;X;X;X;X;X;X;X;X;X;X;X;X;X;Phospho (STY);X;X;X;X;X;X;X;X;X;X;X;X;X;X;X	XXXXXXXXPPPPPPPPPPPPPPPPPPPPPXX	EVIEVENS(1)EPEDGWQPVQRPK	8	5	0.11189			2029;2030;2031;2032	2032	0.564174	0.716893	0.750964	1.4065	1.54673	1.48443	0.000337255	-0.801877	0.573602
A0A1D6HXX4	ZEAMMB73_Zm00001d019501	A0A1D6HXX4;A0A1D6HXX3;A0A3L6D7D4;B4FPZ2;A0A1D6HXX7;A0A1D6HXX5	132;132;132;132;132;132	A0A1D6HXX4	1.01e-06	75.217	1	S	CTTCFGPAPPPPPPPSPKDADAAKETSSSSS	X;X;X;X;X;X;X;X;X;X;X;X;X;X;X;Phospho (STY);X;X;X;X;X;X;X;X;X;X;X;X;X;X;X	PPPPPPPPPPPPPPPPPPXXXXXXXXXXXXX	LLDIVACTTCFGPAPPPPPPPS(1)PK	22	5	0.86155			5582;5583;5584	5583	-0.308638	-0.169473	-0.285685	0.372308	0.256613	0.526959	0.00201443	-0.639892	0.641761
A0A1D6HXX4	ZEAMMB73_Zm00001d019501	A0A1D6HXX4;A0A1D6HXX3;A0A3L6D7D4;B4FPZ2;A0A1D6HXX7;A0A1D6HXX5	164;164;164;164;164;164	A0A1D6HXX4	1.73e-45	135.95	1	S	SKAVASASSGGRRTASPPPASPSSAAAKESS	X;X;X;X;X;X;X;X;X;X;X;X;X;X;X;Phospho (STY);X;X;X;X;X;X;X;X;X;X;X;X;X;X;X	XXXXXXXXXXXXPPPPPPPPPPPPPPPPXXX	T(0.013)AS(0.987)PPPASPSSAAAK	3	2	0.077201			7298;7299;7300;8886;8887;8888	8888	0.642664	0.376208	0.264154	2.05691	2.2612	2.04775	0.000213148	-1.69428	0.30901
A0A1D6I0N4	ZEAMMB73_Zm00001d019881	A0A1D6I0N4;A0A1D6I0N3;A0A3L6E2A8	1326;1326;1464	A0A1D6I0N4	0.000104994	41.484	1	S	NRSELKRLSSKTSGSSFGSGSLIPKLLKNSE	X;X;X;X;X;X;X;X;Phospho (STY);X;X;X;X;X;X;Phospho (STY);X;X;X;X;X;X;X;X;X;X;X;X;X;X;X	XXXXXXXPPPPPPPPPPPPPPPPPPXXXXXX	T(0.036)S(0.036)GS(0.149)S(0.779)FGSGSLIPK	5	3	-0.98927			9307;9308	9307	1.07523	0.955938	0.958945	1.6577	1.70867	1.765	0.000140163	-0.713751	0.609733
A0A1D6I1V6	ZEAMMB73_Zm00001d020057	A0A1D6I1V6;P51059;A0A3L6DYP7;A0A1D6I1V3;A0A1D6I1V4	13;13;13;13;13	A0A1D6I1V6	5.01e-69	100.17	1	S	___MAALGAKMERLSSIDAQLRMLVPGKVSE	X;X;X;X;X;X;X;X;X;X;X;X;X;X;X;Phospho (STY);X;X;X;X;X;X;X;X;X;X;X;X;X;X;X	XXXXXXXXXXXXXPPPPPPPPPXXXXXXXXX	LS(0.001)S(0.999)IDAQLR	3	2	0.36698			5922	5922	-1.20434	-0.991044	-1.17319	0.603461	1.0478	0.850798	0.000173183	-1.95688	0.257586
A0A1D6I494	103632738	A0A1D6I494;K7V958	159;159	A0A1D6I494	2.01e-10	81.874	1	S	PEPFAPPPALMATSLSFKFHHQIPEIPTETT	X;X;X;X;X;X;X;X;X;X;Oxidation (M);X;X;X;X;Phospho (STY);X;X;X;X;X;X;X;X;X;X;X;X;X;X;X	PPPPPPPPPPPPPPPPPPXXXXXXXXXXXXX	GVDAGFAHGLVAPEPFAPPPALMAT(0.008)S(0.042)LS(0.95)FK	28	4	-0.53638			3711;3712	3712	-1.0957	-0.888011	-0.610066	0.364403	-0.0182334	0.349206	0.00432876	-1.09638	0.467687
A0A1D6I5W6	100381485	A0A1D6I5W6;A0A1D6I5V5;A0A1D6I5W9;A0A1D6I5V7;A0A1D6I5X0;A0A1D6I5W4;A0A1D6I5V8;A0A1D6I5W1;A0A1D6I5W8;A0A3L6E0Q9	183;183;183;168;183;168;168;168;183;172	A0A1D6I5W6	7.97e-08	38.213	1	S	YSAAKGGVVMFTRSLSPLKRHGVRVNVLCPE	X;X;X;X;X;X;X;X;X;X;X;X;X;X;X;Phospho (STY);X;X;X;X;X;X;X;X;X;X;X;X;X;X;X	XXXXXXXXXXXXXPPPPPPPXXXXXXXXXXX	SLS(1)PLKR	3	3	-0.41111			8051	8051	0.347651	0.634045	0.441686	1.38094	1.41295	1.38511	0.000413669	-0.91854	0.529044
A0A1D6I610	ZEAMMB73_Zm00001d020748	A0A1D6I610;B4G0R6;A0A3L6DVA2	91;91;91	A0A1D6I610	3.02e-26	108.79	1	S	FHAVAPPRAAAVALGSPAPHQPGQEENKSVW	X;X;X;X;X;X;X;X;X;X;X;X;X;X;X;Phospho (STY);X;X;X;X;X;X;X;X;X;X;X;X;X;X;X	XXXXXXXXPPPPPPPPPPPPPPPPPPPPXXX	AAAVALGS(1)PAPHQPGQEENK	8	3	-1.1808			41;42	42	-0.0665101	-0.140016	-0.160123	0.762232	0.882536	0.875778	3.74166e-05	-0.962399	0.513203
A0A1D6I9T9	103633092	A0A1D6I9T9;A0A1D6I9T7;A0A1D6I9T1;A0A1D6I9S9;A0A3L6E1E6;A0A1D6I9U2;A0A1D6I9U1	247;291;291;291;270;6;85	A0A1D6I9T9	1.88e-06	66.663	1	S	GGTYWGLGRLMTKCKSFDELLELSQRGDNST	X;X;X;X;X;X;X;X;X;X;X;X;X;X;X;Phospho (STY);X;X;X;X;X;X;X;X;X;X;X;X;X;X;X	XXXXXXXXXXXXXPPPPPPPPPPPPPXXXXX	CKS(1)FDELLELSQR	3	3	-0.89326			1288	1288	-0.538525	-0.967695	-0.962096	-0.244423	0.186521	0.052129	0.0126264	-0.820848	0.566109
A0A1D6I9T9	103633092	A0A1D6I9T9;A0A1D6I9T7;A0A1D6I9T1;A0A1D6I9S9	121;165;165;165	A0A1D6I9T9	0.0011814	61.119	1	S	LDFISSKQLHRGGIDSPSWRSGAQSDDIVIK	X;X;X;X;X;X;X;X;X;X;X;X;X;X;X;Phospho (STY);X;X;X;X;X;X;X;X;X;X;X;X;X;X;X	XXXXXXXXXXXPPPPPPPPPXXXXXXXXXXX	GGIDS(0.983)PS(0.017)WR	5	2	-1.9008			2598	2598	-0.471395	-0.605632	-0.801447	0.154545	0.137109	0.142277	0.00130403	-0.770802	0.586092
A0A3L6DYH5	Zm00014a_000419	A0A3L6DYH5;A0A1D6IAN8	32;32	A0A3L6DYH5	1.35e-101	178.16	1	S	SGDHGGKPASLERSGSKVLDGDETLFTDMAQ	X;X;X;X;X;X;X;X;X;X;X;X;X;X;X;Phospho (STY);X;X;X;X;X;X;X;X;X;X;X;X;Oxidation (M);X;X	XXXXXXXXXXXXXPPPPPPPPPPPPPPPPPP	S(0.147)GS(0.84)KVLDGDET(0.013)LFTDMAQEHKEEGNK	3	4	0.54101			7757;7762	7762	2.28634	2.32367	2.06948	3.19255	3.31951	3.24923	0.000298952	-1.02727	0.490639
A0A1D6IAR4	ZEAMMB73_Zm00001d021416	A0A1D6IAR4;C0P9I0	223;56	A0A1D6IAR4	2.86e-05	49.749	3	S	KTSSSSSSSLFARKHSKSSFSIPSPKVMRSE	X;X;X;X;X;X;X;X;X;X;X;X;X;X;X;Phospho (STY);X;Phospho (STY);Phospho (STY);X;Phospho (STY);X;X;Phospho (STY);X;X;X;X;X;X;X	XXXXXXXXXXXXXPPPPPPPPPPPPPXXXXX	KHS(0.781)KS(0.212)S(0.033)FS(0.976)IPS(0.998)PK	3	4	0.75691			4823	4823	-1.86895	-1.81935	-1.74645	0.731284	0.827278	0.864936	1.03133e-06	-2.61941	0.162734
A0A1D6IAR4	ZEAMMB73_Zm00001d021416	A0A1D6IAR4;C0P9I0;B6SSY2	228;61;187	A0A1D6IAR4	2.86e-05	49.749	3	S	SSSSLFARKHSKSSFSIPSPKVMRSEPALIP	X;X;X;X;X;X;X;X;X;X;Phospho (STY);X;X;X;X;Phospho (STY);X;X;Phospho (STY);X;X;X;X;X;X;X;X;X;X;X;X	XXXXXXXXPPPPPPPPPPPPPXXXXXXXXXX	KHS(0.781)KS(0.212)S(0.033)FS(0.976)IPS(0.998)PK	8	4	0.75691			4823	4823	-1.86895	-1.81935	-1.74645	0.731284	0.827278	0.864936	1.03133e-06	-2.61941	0.162734
A0A1D6IAR4	ZEAMMB73_Zm00001d021416	A0A1D6IAR4;C0P9I0;B6SSY2	231;64;190	A0A1D6IAR4	1.39e-06	77.007	1;2;3	S	SLFARKHSKSSFSIPSPKVMRSEPALIPSMG	X;X;X;X;X;X;X;Phospho (STY);X;X;Phospho (STY);X;Phospho (STY);X;X;Phospho (STY);X;X;X;X;X;X;X;X;X;X;X;X;X;X;X	XXXXXPPPPPPPPPPPPPXXXXXXXXXXXXX	KHS(0.781)KS(0.212)S(0.033)FS(0.976)IPS(0.998)PK	11	4	0.75691			4823;8351;8352;8353;8354;8355;8357	4823	2.77359	2.81982	2.67505	3.30599	3.40689	3.35644	0.000313948	-0.600286	0.659623
A0A1D6IAR4	ZEAMMB73_Zm00001d021416	A0A1D6IAR4;A0A3L6DXJ5	33;33	A0A3L6DXJ5	8.44e-05	42.403	1	S	LSHTLYQTHTKRRTTSLALRRSAVDENAGGA	X;X;X;X;X;X;X;X;X;X;X;X;X;X;X;Phospho (STY);X;X;X;X;X;X;X;X;X;X;X;X;X;X;X	XXXXXXXXXXXXXPPPPPPPXXXXXXXXXXX	T(0.03)T(0.03)S(0.94)LALR	3	2	0.18097			9357	9357	-0.157177	-0.157271	-0.133232	1.12971	0.690573	0.982515	0.00110908	-1.08349	0.471885
A0A1D6Q2V8	ZEAMMB73_Zm00001d050675	A0A1D6Q2V8;B6TMP6;B4FUA9;B4FCU1;A0A3L6FZ13;B4FC17;A0A3L6GCB6;B6T6B8;B6TM00;A0A3L6DYD3;A0A1D6IB46	73;54;54;54;54;54;54;63;70;91;91	A0A1D6Q2V8	0.00428692	16.369	1	S	DAPDMVKCQINFKRLSLTDIKIDIKSVPKKT	X;X;X;X;X;X;X;X;X;X;X;X;X;X;X;Phospho (STY);X;X;X;X;X;X;X;X;X;X;X;X;X;X;X	XXXXXXXXXXXXXPPPPPPPPXXXXXXXXXX	RLS(0.995)LT(0.005)DIK	3	3	-0.20485			7104	7104	-1.27081	-1.71758	-1.81978	-0.995907	-1.09154	-0.881439	0.0267317	-0.613093	0.653794
A0A1D6IBS2	100502366	A0A1D6IBS2;A0A1D6IBS1;A0A1D6IBR2;A0A1D6IBR9;A0A1D6IBR7;A0A1D6IBQ9;A0A1D6IBR4;A0A3L6E2S2;A0A1D6IBR0;A0A1D6IBR1	116;79;116;116;174;323;343;323;360;360	A0A1D6IBS2	0.000809786	42.974	1	S	PVSDNMPNDVPARQNSLGLWKYLDDDISLDD	X;X;X;X;X;X;X;X;X;X;X;X;X;X;X;Phospho (STY);X;X;X;X;X;X;X;X;X;X;X;X;X;X;X	XXXXXXXXXXXXXPPPPPPPPXXXXXXXXXX	QNS(1)LGLWK	3	2	-0.35144			6775	6775	1.47746	1.53878	1.48116	2.4427	2.74375	2.60153	0.000251102	-1.09686	0.467534
A0A1D6IHX0	103633352	A0A1D6IHX0;A0A1D6IHW9	284;284	A0A1D6IHX0	0.0031697	28.927	1	S	RPSPPPLPQEQPRRVSPPPLPKEPPCHHPTP	X;X;X;X;X;X;X;X;X;X;X;X;X;X;X;Phospho (STY);X;X;X;X;X;X;X;X;X;X;X;X;X;X;X	XXXXXXXXXXXXXPPPPPPPPPXXXXXXXXX	RVS(1)PPPLPK	3	3	1.1418			7353	7353	-3.41809	-2.90422	-3.08478	-2.46789	-2.78867	-2.25403	0.0431364	-0.632166	0.645207
A0A1D6IIK3	100274738	A0A1D6IIK3;C0P6D0;A0A3L6DXB7	237;237;237	A0A1D6IIK3	1.25e-54	150	1	S	VLNSLEGFFPPDQTNSPGSKHNALEVQRKSC	X;X;X;X;X;X;X;X;X;X;X;X;X;X;X;Phospho (STY);X;X;X;X;X;X;X;X;X;X;X;X;X;X;X	PPPPPPPPPPPPPPPPPPPPXXXXXXXXXXX	FVLNSLEGFFPPDQT(0.237)NS(0.754)PGS(0.009)K	17	3	-0.083575			2370;2371;2372;2373;2374;2375	2371	1.9075	2.00906	1.76848	2.48997	2.44109	2.65965	0.00272226	-0.635225	0.64384
A0A1D6INK8	ZEAMMB73_Zm00001d022502	A0A1D6INK8;A0A1D6INL6;B7ZZU0;A0A1D6INL0;A0A1D6INK6;A0A1D6INL1;A0A1D6INM2;A0A1D6INL2;A0A1D6INM1;A0A1D6INK9;A0A1D6INL8;A0A1D6INK7;A0A1D6INL7;A0A3L6DYU7;A0A1D6INL9	256;256;256;221;227;146;98;29;145;256;256;221;256;187;256	A0A1D6INK8	7.52e-24	114.13	1	S	GRLVNSMQPLSRRTRSIKGDNHIGGPVDGFP	X;X;X;X;X;X;X;X;X;X;X;X;X;X;X;Phospho (STY);X;X;X;X;X;X;X;X;X;X;X;X;X;X;X	XXXXXXXXXXXXXXXPPPPPPPPPPPPPPPP	S(1)IKGDNHIGGPVDGFPK	1	3	1.615			7843;7844;7845	7845	2.03802	2.03149	1.7465	2.56815	2.88501	2.68264	0.00441398	-0.773259	0.585094
A0A1D6INK8	ZEAMMB73_Zm00001d022502	A0A1D6INK8;A0A1D6INL6;B7ZZU0;A0A1D6INL0;A0A1D6INK6;A0A1D6INL1;A0A1D6INM2;A0A1D6INL2;A0A3L6E2G0;A0A1D6INM4;A0A1D6INM3	870;856;856;835;827;746;698;629;31;253;243	A0A1D6INK8	4.35e-07	59.336	1	S	SESINHSHGRHARSSSAIPKSLASLANEYRR	X;X;X;X;X;X;X;X;X;X;X;X;X;X;X;Phospho (STY);X;X;X;X;X;X;X;X;X;X;X;X;X;X;X	XXXXXXXXXXXXXPPPPPPPXXXXXXXXXXX	SS(0.002)S(0.998)AIPK	3	2	0.04818			8417	8417	0.559056	0.565254	0.398453	1.1737	1.20554	1.25352	0.000289737	-0.703333	0.614152
A0A1D6ITS4	103640814	A0A1D6ITS4;A0A1D6ITT1;K7TIX2;A0A3L6GBA9;A0A1D6ITS6;A0A1D6ITS9;A0A1D6ITS8;A0A1D6ITS5;K7TXA3;A0A1D6ITT3;A0A1D6ITT8;A0A1D6ITT7;A0A1D6ITT6;A0A1D6ITU0	386;387;386;386;386;412;423;423;386;149;166;166;149;109	A0A1D6ITS4	2.21e-122	166.72	1	S	QKVFEKGASFLAGNLSFSRARASLEGSAPVP	X;X;X;X;X;X;X;X;X;X;X;X;X;X;X;Phospho (STY);X;X;X;X;X;X;X;X;X;X;X;X;X;X;X	XXXXXXPPPPPPPPPPPPPXXXXXXXXXXXX	GASFLAGNLS(1)FSR	10	2	0.5515			2429;2430	2430	1.93002	2.00586	1.83446	2.6533	2.79686	2.62969	0.000434023	-0.769835	0.586484
A0A1D6ITS4	103640814	A0A1D6ITS4;A0A1D6ITT1;K7TIX2;A0A3L6GBA9;A0A1D6ITS6;A0A1D6ITS9;A0A1D6ITS8;A0A1D6ITS5;K7TXA3;A0A1D6MZK8;A0A1D6MZK9;A0A3L6FAL4	6;6;6;6;6;6;6;6;6;6;6;6	A0A1D6ITS4	0.00211334	42.184	1;2	S	__________MHRVGSAGNTAGSTRPRKEKR	X;X;X;X;X;X;X;X;X;X;X;X;X;X;X;Phospho (STY);X;X;X;X;X;X;Phospho (STY);X;X;X;X;X;X;X;X	XXXXXXXXXXXXXPPPPPPPPPPPPPPXXXX	VGS(0.973)AGNT(0.027)AGS(0.555)T(0.444)RPR	3	3	0.57625			9660;9661	9661	-2.81675	-2.79994	-2.75195	-2.01993	-2.03502	-2.00504	3.47652e-06	-0.769551	0.5866
C4IZI3	ZEAMMB73_Zm00001d023682	C4IZI3;A0A1D6IUT3;A0A1D6IUS9;A0A1D6MTX5;A0A1D6IUT2;C0P4H6;A0A3L6FHX5;A0A1D6MTX4;A0A1D6IUT1;A0A3L6G5P8;A0A1D6IUT0;B4FZI2;A0A3L6F461	12;335;335;209;209;329;333;333;335;343;343;366;377	C4IZI3	0.019404	26.297	1	S	____MKEYIARFGHGSAKLARQAQSKEKTLA	X;X;X;X;X;X;X;X;X;X;X;X;X;X;X;Phospho (STY);X;X;X;X;X;X;X;X;X;X;X;X;X;X;X	XXXXXXXXXXXPPPPPPPXXXXXXXXXXXXX	FGHGS(1)AK	5	3	0.86533			2186	2186	-1.33723	-1.05057	-1.1178	-0.491149	-0.483912	-0.450537	0.00137016	-0.693333	0.618424
A0A1D6IW01	103640934	A0A1D6IW01;K7UCZ1;A0A1D6IW04;A0A1D6IW03;A0A3L6G5V4;A0A1D6IVZ5;A0A1D6IVZ6	650;962;1053;1093;1103;1103;1119	A0A1D6IW01	0.000134765	54.809	1	S	EFVDPIRPTVRIVGGSFSKDESLPKLTHRRT	X;X;X;X;X;X;X;X;X;X;X;X;X;X;X;Phospho (STY);X;X;X;X;X;X;X;X;X;X;X;X;X;X;X	XXXXXXXXXXXPPPPPPPPPPPPPPXXXXXX	IVGGS(0.987)FS(0.012)KDES(0.002)LPK	5	3	0.54491			4429	4429	0.459236	0.324129	0.0447621	0.842574	1.06635	0.809329	0.0125843	-0.630043	0.646157
A0A1D6IX34	ZEAMMB73_Zm00001d023974	A0A1D6IX34;C0HH08;B6SXX4	9;16;16	A0A1D6IX34	0.0148382	16.943	1	S	_______MANRVTSHSPKAMVSEPDPNRMMM	X;X;X;X;X;X;X;X;X;X;X;X;X;X;X;Phospho (STY);X;X;X;X;X;X;X;X;X;X;X;X;X;X;X	XXXXXXXXXXXPPPPPPPXXXXXXXXXXXXX	VT(0.002)S(0.003)HS(0.995)PK	5	3	0.9509			10042	10042	-1.52307	-1.52163	-1.60165	-1.2152	-0.697207	-0.877437	0.0159209	-0.618833	0.651197
A0A1D6J377	ZEAMMB73_Zm00001d024964	A0A1D6J377;A0A1D6NLD4;A0A1D6NLC9;A0A1D6NLD1;C0PD86;A0A3L6FCY4;A0A1D6JHM2	83;98;182;289;461;461;122	A0A1D6J377	3.28e-07	39.851	1	S	TRWQVQTTSRATRSLSTLTRAVRRGGESTEI	X;X;X;X;X;X;X;X;X;X;X;X;X;X;X;Phospho (STY);X;X;X;X;X;X;X;X;X;X;X;X;X;X;X	XXXXXXXXXXXXXPPPPPPPXXXXXXXXXXX	S(0.007)LS(0.952)T(0.041)LTR	3	2	0.29608			8063	8063	1.05905	1.15936	1.04895	1.65543	1.85968	1.82538	0.000669854	-0.691043	0.619406
A0A1D6J6B4	ZEAMMB73_Zm00001d025294	A0A1D6J6B4;A0A1D6J6B5;C0PMQ7	212;221;385	A0A1D6J6B4	0.000447471	43.691	1	S	PVTLHKNEGNIESQKSPLVSNNTKGEERALG	X;X;X;X;X;X;X;X;X;X;X;X;X;X;X;Phospho (STY);X;X;X;X;X;X;X;X;X;X;X;X;X;X;X	XXXXXXPPPPPPPPPPPPPPPPPPXXXXXXX	NEGNIES(0.155)QKS(0.838)PLVS(0.007)NNTK	10	3	0.052173			6335;6336	6336	-0.549732	-0.505108	-0.604536	0.240811	-0.290749	0.342072	0.030512	-0.650503	0.637058
C0PFJ7	100284353	C0PFJ7;A0A1D6J6R2;B6TSN4;A0A3L6G7Z9	92;129;157;157	C0PFJ7	0.00557245	26.443	1	S	VRSQASRGSRTRSFFSFRGERSERPSFTDDY	X;X;X;X;X;X;X;X;X;X;X;X;X;X;X;Phospho (STY);X;X;X;X;X;X;X;X;X;X;X;X;X;X;X	XXXXXXXXXXXXPPPPPPPPPXXXXXXXXXX	SFFS(1)FRGER	4	3	0.032311			7646	7646	-2.43711	-2.43343	-1.74577	-1.45223	-0.958055	-1.48115	0.0335711	-0.90829	0.532816
A0A1D6J6X1	103641640	A0A1D6J6X1;A0A3L6G6L2;A0A1D6J6W9;K7U3F5;A0A1D6J6X2;A0A3L6G261;A0A1D6EB28;A0A1D6EB27;A0A1D6EB26;A0A1D6EB29	207;207;207;207;207;206;206;206;206;206	A0A1D6J6X1	2.54e-55	123.71	1	S	IDNKSLRLITDASVSSPISREKSQGLDPNMR	X;X;X;X;X;X;X;X;X;X;X;X;X;X;X;Phospho (STY);X;X;X;X;X;X;X;X;X;X;X;X;X;X;X	XXXXXXXPPPPPPPPPPPPPXXXXXXXXXXX	LITDASVS(0.011)S(0.989)PISR	9	2	0.37603			5527;5528;5529	5528	1.50176	1.1882	1.22052	2.00808	1.98241	2.09038	0.00230626	-0.723464	0.605641
A0A1D6J803	ZEAMMB73_Zm00001d025590	A0A1D6J803;A0A1D6J809;A0A1D6J7Y6;C0PGU4;A0A1D6J7Y4;A0A3L6G877;A0A1D6J810;A0A1D6J7Z9;A0A1D6J802;A0A1D6J806;A0A1D6J7Z2;A0A1D6J807;A0A1D6J7Z5;A0A1D6J7Z6;A0A1D6J801;A0A1D6J7Y9;A0A1D6J804;A0A1D6J7Z7;A0A1D6J808;A0A1D6J7Z1;K7TTT4;A0A1D6J7Z4;A0A1D6J7Y5	217;493;662;659;656;652;634;659;588;569;539;483;659;659;659;431;659;382;659;217;217;178;668	A0A1D6J803	9.16e-07	80.791	1	S	LSLRSGSLRNLSYSYSTGADGRIEMVSNADN	X;X;X;X;X;X;X;X;X;X;X;X;X;X;X;Phospho (STY);X;X;X;X;X;X;X;X;X;X;X;X;X;X;X	XXXXXXXXXPPPPPPPPPPPPPXXXXXXXXX	NLSYS(0.019)YS(0.957)T(0.024)GADGR	7	2	-0.55685			6443	6443	-0.704761	-0.904068	-1.167	-0.115935	-0.494384	-0.243863	0.0211734	-0.64055	0.641469
A0A3L6GGJ4	EIF4B_2	A0A3L6GGJ4;B6TZD9;A0A1D6J8M8;A0A1D6J8M9;A0A1D6J8N0	214;214;214;214;58	A0A3L6GGJ4	5.46e-23	123.02	1	S	DDWSRGKKPLPARYPSLGSGGGFRDSPAFRD	X;X;X;X;X;X;X;X;X;X;X;X;X;X;X;Phospho (STY);X;X;X;X;X;X;X;X;X;X;X;X;X;X;X	XXXXXXXXXXXXXPPPPPPPPPPPXXXXXXX	YPS(0.968)LGS(0.032)GGGFR	3	2	-0.21324			10363;10364	10364	1.20885	1.02785	1.10599	1.74607	1.70104	1.82251	0.000530334	-0.642313	0.640685
A0A1D6JB12	100216619	A0A1D6JB12;B4FIX4;A0A3L6GBL7	85;92;92	A0A1D6JB12	0.000229141	69.706	1	S	DRSFYDRDDTDYIEGSDDGPPRKSSEDIVQL	X;X;X;X;X;X;X;X;X;X;X;X;X;X;X;Phospho (STY);X;X;X;X;X;X;X;X;X;X;X;X;X;X;X	XXPPPPPPPPPPPPPPPPPPPPPXXXXXXXX	SFYDRDDTDYIEGS(1)DDGPPR	14	3	0.65304			7690;7691	7690	-0.320918	-0.13633	-0.126734	0.457386	0.340392	0.443887	0.00114362	-0.608549	0.655856
A0A1D6JD07	ZEAMMB73_Zm00001d026139	A0A1D6JD07;A0A1D6JD09	262;67	A0A1D6JD07	0.000373098	61.928	1	S	SVFIEEGKVYKDLVGSAYYVAPEVLRRNYGR	X;X;X;X;X;X;X;X;X;X;X;X;X;X;X;Phospho (STY);X;X;X;X;X;X;X;X;X;X;X;X;X;X;X	XXXXXXXXPPPPPPPPPPPPPPPPPPXXXXX	VYKDLVGS(0.996)AYY(0.004)VAPEVLR	8	3	0.32355			10123	10123	0.0604049	0.0403562	-0.0643509	0.840022	1.32729	1.01613	0.00207131	-1.04901	0.483299
A0A3L6GCD3	MTK1	A0A3L6GCD3;A0A1D6JHK7	84;84	A0A3L6GCD3	3.12e-06	71.149	1	S	RVRPTLTPTGPLRSASLSFLTLTAPRSGGKR	X;X;X;X;X;X;X;X;X;X;X;X;X;X;X;Phospho (STY);X;X;X;X;X;X;X;X;X;X;X;X;X;X;X	XXXXXXXXXXXXXPPPPPPPPPPPPPXXXXX	S(0.005)AS(0.989)LS(0.005)FLTLTAPR	3	2	-0.97417			7498	7498	-0.99217	-0.936728	-0.686852	-0.0563217	0.144092	-0.06143	0.00160136	-0.880697	0.543105
A0A3L6GCF3	TSJT1_3	A0A3L6GCF3;B6T2A6;A0A1D6JI62;C0HEQ9	225;229;229;153	A0A3L6GCF3	1.6e-06	63.195	1	S	FEHPMNRLKAMPRVDSEGAMCGATFKVDTFT	X;X;X;X;X;X;X;X;X;X;X;X;X;X;X;Phospho (STY);X;X;X;Oxidation (M);X;X;X;X;X;X;X;X;X;X;X	XXXXXXXXXXXXXPPPPPPPPPPPPPXXXXX	VDS(1)EGAMCGATFK	3	3	0.14796			9507;9508;9509;9510;9511	9511	1.12677	1.06303	1.16378	2.7346	2.94135	2.83683	1.3316e-05	-1.71973	0.303605
A0A1D6JJX6	ZEAMMB73_Zm00001d027278	A0A1D6JJX6;A0A1D6JJU6;A0A317YI64;A0A1D6JJP5;A0A1D6JJT1;A0A1D6JJS7;A0A1D6JJV5;A0A1D6JJT9;A0A1D6JJU0;A0A1D6JJT4;A0A1D6JJS4;A0A1D6JJP3;A0A1D6JJU4;A0A1D6JJY0;A0A1D6JJX7;A0A1D6JJW3;A0A1D6JJW7;A0A1D6JJW6;A0A1D6JJS6;A0A1D6JJT3;A0A1D6JJV9;A0A1D6JJP8;A0A1D6JJP2;A0A1D6JJT6;A0A1D6JJQ0;A0A1D6JJP9;A0A1D6JJR4;A0A1D6JJP6;A0A1D6JJY7;A0A1D6JJZ7;A0A1D6JK03;A0A1D6JJY9;A0A1D6JK10;A0A1D6JK08;A0A1D6JJU5;A0A1D6JK07	1055;1369;2022;1814;1669;1666;1146;1484;1463;938;1669;1814;1374;1013;1055;1087;1114;1114;1666;1651;1146;1812;1823;1603;1817;1817;1817;1814;835;707;707;835;265;411;265;495	A0A1D6JJX6	3.18e-105	150.8	1	S	QNVLDALSKHTKRPGSPESLQQLIEIARNNV	X;X;X;X;X;X;X;X;X;X;X;X;X;X;X;Phospho (STY);X;X;X;X;X;X;X;X;X;X;X;X;X;X;X	XXXXXXXXXXXXPPPPPPPPPPPPPPPPXXX	RPGS(0.995)PES(0.005)LQQLIEIAR	4	2	-0.52906			7154;7155	7155	1.46431	1.08268	1.30562	1.87236	1.9594	1.89	0.00542159	-0.623046	0.649299
C0HEK2	ZEAMMB73_Zm00001d027436	C0HEK2;A0A1D6JM48;C0PGT7	168;399;452	C0HEK2	6.86e-12	90.059	1	S	RRKRRMARPAPLEKESSKPLPWSQESSGWVL	X;X;X;X;X;X;X;X;X;X;X;X;X;X;X;Phospho (STY);X;X;X;X;X;X;X;X;X;X;X;X;X;X;X	XXXXXXXXPPPPPPPPPPPPPPPPPPPPPPP	PAPLEKES(0.968)S(0.032)KPLPWSQESSGWVLEPSSR	8	4	1.625			6559	6559	-0.106184	-0.00228581	-0.565099	0.521849	0.326747	0.522086	0.0210493	-0.681417	0.623553
A0A1R3LB85	ZEAMMB73_Zm00001d027625	A0A1R3LB85;A0A1D6JND3;A7KVC2;A0A317YJB4	815;884;884;884	A0A1R3LB85	0.000217923	37.536	1	S	DTVSSIPNKRLTPSISNIDNLKNKMCENGQP	X;X;X;X;X;X;X;X;X;X;X;X;X;X;X;Phospho (STY);X;X;X;X;X;X;X;X;X;X;X;X;X;X;X	XXXXXXXXXXPPPPPPPPPPPPXXXXXXXXX	LT(0.006)PS(0.053)IS(0.941)NIDNLK	6	3	-0.10067			5974	5974	-2.68188	-3.10327	-2.83422	-1.138	-1.03901	-1.08283	0.000145812	-1.78651	0.289872
A0A1D6JNN0	ZEAMMB73_Zm00001d027665	A0A1D6JNN0;A0A1D6JNN5;A0A1D6JNM7;A0A1D6JNP2;A0A1D6JNL4;A0A1D6JNN2;A0A1D6JNN6;A0A1D6JNM0;A0A1D6JNM2;A0A317YHV3;A0A1D6JNK5;A0A1D6JNL8;A0A1D6JNL7;A0A1D6JNK8	234;176;395;13;395;176;176;395;395;423;782;597;637;1000	A0A1D6JNN0	2.23e-103	154.55	1	S	TFTMNKQIDRGTRSLSSLPSAFVLPSRDSLS	X;X;X;X;X;X;X;X;X;X;X;X;X;X;X;Phospho (STY);X;X;X;X;X;X;X;X;X;X;X;X;X;X;X	XXXXXXXXXXXXXPPPPPPPPPPPPPPXXXX	S(0.115)LS(0.77)S(0.115)LPSAFVLPSR	3	3	-0.76758			8058	8058	-4.30484	-4.85311	-5.11598	-4.09932	-3.13383	-3.2889	0.0309298	-1.25062	0.420266
A0A317YKF6	Zm00014a_030672	A0A317YKF6;A0A1D6JP08	97;97	A0A317YKF6	3.66e-123	182.57	1	S	LKLDVEDLVSSGAALSRASSASLGFSFTFTG	X;X;X;X;X;X;X;X;X;X;X;X;X;X;X;Phospho (STY);X;X;X;X;X;X;X;X;X;X;X;X;X;X;X	XXPPPPPPPPPPPPPPPXXXXXXXXXXXXXX	LDVEDLVSSGAALS(1)R	14	2	-0.14026			5327;5328	5328	1.34601	1.38066	1.45973	2.27148	1.73082	2.44538	0.0257839	-0.753758	0.593057
A0A1D6PIU1	103639503	A0A1D6PIU1;A0A317Y9C8;A0A317Y6R7;A0A1D6PIT5;A0A1D6PIU2;A0A1D6PIS4;A0A1D6PIT0;A0A1D6JQK7;A0A1D6PIT2;A0A1D6JQL2;A0A1D6PIS8;A0A1D6PIU9;A0A1D6PIT3;A0A1D6PIU7;A0A1D6JQL8;A0A1D6PIS6;A0A1D6PIS9;C0PJN0;A0A1D6PIV2;A0A3L6DEI1;A0A1D6JQL0	256;515;613;611;605;588;566;584;560;577;566;328;561;474;469;392;337;328;328;337;613	A0A1D6PIU1	1.07e-05	57.828	1	S	YNIGRQGTLKEEIGRSFIKRSLSDGNILLEN	X;X;X;X;X;X;X;X;X;X;X;X;X;X;X;Phospho (STY);X;X;X;X;X;X;X;X;X;X;X;X;X;X;X	XXXXXPPPPPPPPPPPPPPXXXXXXXXXXXX	QGTLKEEIGRS(1)FIK	11	4	0.58691			6700	6700	-1.13213	-0.963928	-1.06474	0.246869	0.52311	0.599154	0.000212527	-1.50998	0.351117
A0A317Y6H2	MED37C_1	A0A317Y6H2;A0A1D6JY66;A0A1D6JY65;A0A1D6JY67;B6SZ69;A0A1D6JY70	504;519;582;607;634;219	A0A317Y6H2	1.31e-05	42.527	1	S	GAAGPDMAGGMDQDASPAGGSGAGPKIEEVD	X;X;X;X;X;X;Oxidation (M);X;X;X;Oxidation (M);X;X;X;X;Phospho (STY);X;X;X;X;X;X;X;X;X;X;X;X;X;X;X	PPPPPPPPPPPPPPPPPPPPPPPPPPXXXXX	MY(0.001)QGAAGPDMAGGMDQDAS(0.973)PAGGS(0.025)GAGPK	19	3	0.23604			6261;6262	6262	-2.841	-2.73037	-2.85167	-0.84289	-0.783775	-0.963765	7.74016e-06	-1.9442	0.259858
A0A3L6DXE1	CIPK31_2	A0A3L6DXE1;A0A1D6K123;B8A0K9;B5AU21;A0A317YAU7	50;357;428;428;454	A0A3L6DXE1	2.16e-06	59.569	1	S	AKGDTLEFQKFYRSLSTQLKDVVWKCDDEVD	X;X;X;X;X;X;X;X;X;X;X;X;X;X;X;Phospho (STY);X;X;X;X;X;X;X;X;X;X;X;X;X;X;X	XXXXXXXXXXXXXPPPPPPPPPPPPXXXXXX	S(0.018)LS(0.844)T(0.137)QLKDVVWK	3	3	1.3139			8064	8064	-0.773378	-0.841067	-1.06042	0.219882	1.7508	0.263824	0.0327349	-1.63646	0.321645
A0A1D6K142	100382001	A0A1D6K142;A0A1D6K141;A0A1D6K139;A0A317YG15;C0P3H7;A0A1D6K143	777;800;817;777;255;287	A0A317YG15	3.76e-44	40.076	1	S	HQEKQRGGSKLTLSLSRSGRSNGEMGEVHRS	X;X;X;X;X;X;X;X;X;X;X;X;X;X;X;Phospho (STY);X;X;X;X;X;X;X;X;X;X;X;X;X;X;X	XXXXXXXXXXPPPPPPPXXXXXXXXXXXXXX	LTLSLS(1)R	6	2	-0.030923			5961	5961	0.308889	0.46706	0.278686	1.18995	1.51277	1.41588	0.000804107	-1.02132	0.492665
A0A1D6K142	100382001	A0A1D6K142;A0A1D6K141;A0A1D6K139;A0A1D6K147;A0A1D6K140;A0A1D6K146	352;352;352;352;352;352	A0A1D6K142	0.000265115	42.646	1	S	VDSPTEKTKDHPGVDSPAEKPKHDMRVLDIS	X;X;X;X;X;X;X;X;X;X;X;X;X;X;X;Phospho (STY);X;X;X;X;X;X;X;X;X;X;X;X;X;X;X	XXXXXXXPPPPPPPPPPPPPPPXXXXXXXXX	T(0.031)KDHPGVDS(0.969)PAEKPK	9	4	1.013			9121	9121	-1.30782	-1.25883	-1.42154	0.323122	0.841887	0.132101	0.00126186	-1.76177	0.294886
A0A1D6K2D7	103634623	A0A1D6K2D7;A0A1D6K2G2;A0A1D6K2E3;A0A1D6K2D8;A0A1D6K2G3;A0A1D6K2G5;A0A1D6K2H6;A0A317YIK2;Q8L5H0;A0A1D6K2E8;A0A1D6K2F6;A0A1D6K2E4;A0A1D6K2G7;A0A1D6K2H5;A0A1D6K2G4;A0A1D6K2F5;A0A1D6K2E0	11;11;11;11;11;11;11;11;11;11;11;11;11;11;11;11;11	A0A1D6K2D7	0.0089798	31.485	1	S	_____MSAPKLDRNPSIRDRVEDTLHAHRNE	X;X;X;X;X;X;X;X;X;X;X;X;X;X;X;Phospho (STY);X;X;X;X;X;X;X;X;X;X;X;X;X;X;X	XXXXXXXXXXPPPPPPPPPPXXXXXXXXXXX	LDRNPS(1)IRDR	6	3	1.4801			5309	5309	-0.397618	-0.610273	-0.740827	0.139211	0.409924	0.227205	0.0027608	-0.841686	0.557991
A0A1D6K504	103626516	A0A1D6K504;B6TBV6;A0A1D6K502;B6T4D2;B6T0Z1;B6SGI4;A0A3L6F6A0;A0A317YE34;B6TLT4;B6UF11;A0A1D6K500;B6T670	7;7;7;7;7;7;7;7;7;23;7;7	A0A1D6K504	0.0111344	36.367	1	S	_________MGKGTGSFGKRRNKTHTLCIRC	X;X;X;X;X;X;X;X;X;X;X;X;X;X;X;Phospho (STY);X;X;X;X;X;X;X;X;X;X;X;X;X;X;X	XXXXXXXXXXXXPPPPPPPXXXXXXXXXXXX	GT(0.002)GS(0.998)FGK	4	2	-0.43417			3685	3685	-0.931453	-1.15016	-0.745313	0.432019	0.0186372	0.284373	0.00212766	-1.18732	0.439119
A0A317YE93	PMI1_0	A0A317YE93;A0A1D6K7M3	452;475	A0A317YE93	0.00146931	37.38	1	S	KKKLRLPMTPRSEPASPARKAATTPPVVPDL	X;X;X;X;X;X;X;X;X;X;X;X;X;X;X;Phospho (STY);X;X;X;X;X;X;X;X;X;X;X;X;X;X;X	XXXXXXXXXXXPPPPPPPPXXXXXXXXXXXX	SEPAS(1)PAR	5	2	0.57122			7615	7615	-3.2008	-3.58413	-3.20712	-2.2286	-2.74204	-2.47073	0.0120761	-0.850231	0.554696
A0A1D6K7X5	100384314	A0A1D6K7X5;A0A1D6K7X6;A0A1D6K7Y6;A0A1D6K7Y8;A0A1D6K7X9;A0A1D6K7X7;A0A1D6K7X4;A0A1D6K7W9;A0A1D6K7X1;A0A317YEM7;A0A1D6K7X2	150;315;526;465;540;540;675;724;724;724;724	A0A1D6K7X5	0.0155234	31.641	1	S	QLPSRTPKAKMVKGNSLHWKDGDISSQTGSS	X;X;X;X;X;X;X;X;X;X;X;X;X;X;X;Phospho (STY);X;X;X;X;X;X;X;X;X;X;X;X;X;X;X	XXXXXXXXXXXXXPPPPPPPXXXXXXXXXXX	GNS(1)LHWK	3	3	0.06104			3499	3499	-1.71408	-1.39503	-1.51551	-0.220082	-0.158748	-0.175413	0.000138474	-1.35679	0.39045
A0A1D6KE24	103639924	A0A1D6KE24;A0A1D6KE29;A0A1D6KE25;A0A1D6MWU8;A0A1D6KE31;K7TQM1;B4FSP6;A0A1D6MWU6;B7ZZ42	82;82;82;82;82;82;82;82;82	A0A1D6KE24	1.16e-32	118.65	1	S	INTVFDAKRLIGRRFSDASVQSDIKLWPFKV	X;X;X;X;X;X;X;X;X;X;X;X;X;X;X;Phospho (STY);X;X;X;X;X;X;X;X;X;X;X;X;X;X;X	XXXXXXXXXXXXXPPPPPPPPPPPPXXXXXX	RFS(1)DASVQSDIK	3	2	-0.1031			6967;6968	6968	0.514782	0.524033	0.372612	1.21996	1.42297	1.33012	0.000365748	-0.853873	0.553297
A0A1D6KEZ8	103640517	A0A1D6KEZ8;A0A317YD96;A0A1D6KEZ7	195;430;431	A0A1D6KEZ8	0.000438559	42.693	1	S	KIWDKPIVKLLSPVLSLPTPNKAANQSSEDA	X;X;X;X;X;X;X;X;X;X;X;X;X;X;X;Phospho (STY);X;X;X;X;X;X;X;X;X;X;X;X;X;X;X	XXXXXXXXXPPPPPPPPPPPPPXXXXXXXXX	LLS(0.005)PVLS(0.987)LPT(0.008)PNK	7	3	-2.4194			5658	5658	-4.14332	-3.91276	-3.77754	-2.3698	-2.74373	-2.78314	0.00150092	-1.31232	0.402674
A0A317YHP4	CAT2_0	A0A317YHP4;A0A1D6KGL1;A0A1D6KGL2	24;24;24	A0A317YHP4	0.00111815	35.543	1	S	MRRKQVDSERTRAAGSAHQLRKELSVTQLVA	X;X;X;X;X;X;X;X;X;X;X;X;X;X;X;Phospho (STY);X;X;X;X;X;X;X;X;X;X;X;X;X;X;X	XXXXXXXXXXXXPPPPPPPPPPXXXXXXXXX	AAGS(1)AHQLRK	4	3	1.1606			88;89;90;91	91	0.846347	0.921945	0.701728	1.83423	2.00531	1.71735	0.000622818	-1.02896	0.490065
A0A1D6KIG3	ZEAMMB73_Zm00001d031364	A0A1D6KIG3;C0PM22;A0A1D6KIH4;B6T171;A0A317Y206	26;38;38;38;38	A0A1D6KIG3	1.1e-08	80.132	1	S	GPVNRAMNRQNEDYRSPAVPALTKVLLEDVK	X;X;X;X;X;X;X;X;X;X;X;X;X;X;X;Phospho (STY);X;X;X;X;X;X;X;X;X;X;X;X;X;X;X	XXXXXXXXXPPPPPPPPPPPPPPPXXXXXXX	QNEDY(0.001)RS(0.999)PAVPALTK	7	3	-0.60657			6769	6769	-0.314353	-0.188434	0.00653333	0.368682	0.610201	0.411995	0.00620666	-0.629044	0.646605
A0A1D6KJM1	ZEAMMB73_Zm00001d031554	A0A1D6KJM1;A0A1D6KJM3;A0A1D6KJM2;A0A317Y3A1	323;409;414;414	A0A1D6KJM1	2.05e-22	104.87	1	S	IKAKPTKKEKLQGSLSFFRKSRNALMGAADA	X;X;X;X;X;X;X;X;X;X;X;X;X;X;X;Phospho (STY);X;X;X;X;X;X;X;X;X;X;X;X;X;X;X	XXXXXXXXXXPPPPPPPPPXXXXXXXXXXXX	LQGSLS(1)FFR	6	2	0.21123			5781	5781	0.146639	0.0754295	-0.0648831	1.32602	0.901932	1.5957	0.00443653	-1.22216	0.428641
A0A1D6KKH9	103627760	A0A1D6KKH9;A0A1D6QEB9;A0A3L6ET66;A0A1D6KKH8	10;10;10;10	A0A1D6KKH9	0.00541273	32.274	1	S	______MSRPLYRGVSGIGGKLAAADEAYYD	X;X;X;X;X;X;X;X;X;X;X;X;X;X;X;Phospho (STY);X;X;X;X;X;X;X;X;X;X;X;X;X;X;X	XXXXXXXXXXXXXPPPPPPPPXXXXXXXXXX	GVS(1)GIGGK	3	2	0.28212			3729	3729	0.581657	0.446002	0.392185	1.27012	1.42261	1.32791	0.000269659	-0.866933	0.548311
A0A1D6KQ74	ZEAMMB73_Zm00001d032353	A0A1D6KQ74;A0A317YF13;B6SS20	530;524;497	A0A1D6KQ74	1.91e-06	59.693	1	S	QLDGSDHVEPLRNRLSENTELQSAKLVKATA	X;X;X;X;X;X;X;X;X;X;X;X;X;X;X;Phospho (STY);X;X;X;X;X;X;X;X;X;X;X;X;X;X;X	XXXXXXXXXXXXPPPPPPPPPPPPPXXXXXX	NRLS(1)ENTELQSAK	4	2	-0.14382			6500;6501;6502	6502	1.00428	0.8101	0.661475	1.47205	1.67924	1.50246	0.00358783	-0.725965	0.604593
A0A3L6EV94	NPGR2_0	A0A3L6EV94;A0A1D6KTP5;A0A1D6KTP1;A0A317Y6A1;A0A1D6KTN8	187;36;52;52;52	A0A3L6EV94	0.00203958	52.534	1	S	SSDSTITKDFSASGYSSRNGEIEQYLDNGNI	X;X;X;X;X;X;X;X;X;X;X;X;X;X;X;Phospho (STY);X;X;X;X;X;X;X;X;X;X;X;X;X;X;X	XXXXXXXXPPPPPPPPPPXXXXXXXXXXXXX	DFSAS(0.002)GY(0.026)S(0.84)S(0.131)R	8	2	-0.0011504			1338	1338	-1.07986	-1.37286	-1.24559	-0.701765	-0.254726	-0.447863	0.00781229	-0.764653	0.588595
A0A1D6KTX9	ZEAMMB73_Zm00001d032776	A0A1D6KTX9;Q6UDF1;A0A317YF73;A0A1D6KTX6;A0A1D6KTX7	89;197;197;197;224	A0A1D6KTX9	5.94e-48	141.08	1	S	WKTKQEKRGKLNHDDSDDDDDKNEDEYMLLA	X;X;X;X;X;X;X;X;X;X;X;X;X;X;X;Phospho (STY);X;X;X;X;X;X;X;X;X;X;X;Oxidation (M);X;X;X	XXXXXXXXPPPPPPPPPPPPPPPPPPPPPPP	GKLNHDDS(1)DDDDDKNEDEYMLLAEAR	8	5	-0.68417			3414;3415;5680;5681	3414	0.667511	0.736441	0.620883	1.09975	1.48588	1.31407	0.00585177	-0.624956	0.64844
A0A1D6KTX9	ZEAMMB73_Zm00001d032776	A0A1D6KTX9;Q6UDF1;A0A317YF73;A0A1D6KTX6;A0A1D6KTX7	26;134;134;134;134	A0A1D6KTX9	1.35e-55	149.84	1	S	KSPKKPHEPVAFDVYSENGEHPAQKWRTGGQ	X;X;X;X;X;X;X;X;X;X;X;X;X;X;X;Phospho (STY);X;X;X;X;X;X;X;X;X;X;X;X;X;X;X	XXXXPPPPPPPPPPPPPPPPPPPPPXXXXXX	KPHEPVAFDVYS(1)ENGEHPAQK	12	4	0.001775			4998	4998	-0.117676	-0.0959896	-0.368632	0.725971	0.874678	0.825378	0.000510322	-1.00278	0.499039
A0A1D6KTX9	ZEAMMB73_Zm00001d032776	A0A1D6KTX9;Q6UDF1;A0A317YF73;A0A1D6KTX6;A0A1D6KTX7;A0A1D6KTX8	561;669;669;669;696;478	A0A1D6KTX9	0.00564925	22.848	1	S	GFYRKRSKKDKLGGGSVAGSKKGGGLYKKHQ	X;X;X;X;X;X;X;X;X;X;X;X;X;X;X;Phospho (STY);X;X;X;X;X;X;X;X;X;X;X;X;X;X;X	XXXXXXXXXXXPPPPPPPPPPXXXXXXXXXX	LGGGS(0.835)VAGS(0.165)K	5	2	0.47069			5420	5420	-0.519072	-0.894349	-1.04942	-0.130754	-0.147607	-0.0963295	0.0116822	-0.696051	0.61726
A0A1D6KUA6	100281495	A0A1D6KUA6;A0A1D6KUA5;A0A1D6KUA4;B4FXV2;B6SSI8;A0A317YAZ4;B6ST51	37;37;279;236;279;279;280	A0A1D6KUA6	0.00283133	36.102	1	S	RRSDSLSRADTTLGMSMRSRSYNSEGGDIQV	X;X;X;X;X;X;X;X;X;X;X;X;X;X;Oxidation (M);Phospho (STY);Oxidation (M);X;Phospho (STY);X;Phospho (STY);X;X;X;X;X;X;X;X;X;X	XXXXXXXXPPPPPPPPPPXXXXXXXXXXXXX	ADT(0.001)T(0.001)LGMS(0.998)MR	8	2	-0.32739			220	220	-3.26419	-3.58945	-2.9181	-2.31983	-2.16995	-1.93959	0.00753003	-1.11413	0.461971
A0A1D6KUA6	100281495	A0A1D6KUA6;A0A1D6KUA5;A0A1D6KUA4;B4FXV2;B6SSI8;A0A317YAZ4;B6ST51	6;6;248;205;248;248;249	A0A1D6KUA6	0.00107587	38.287	1	S	__________MSRASSVNGGGADADCVGELI	X;X;X;X;X;X;X;X;X;X;X;X;X;X;X;Phospho (STY);X;X;X;X;X;X;X;X;X;X;X;X;X;X;X	XXXXXXXXXXXXXPPPPPPPPPPPPPPPPPP	AS(0.194)S(0.806)VNGGGADADCVGELIR	3	2	-0.39297			978	978	-1.40554	-1.60728	-1.4426	-0.777984	-0.505335	-0.888492	0.00420301	-0.761202	0.590004
A0A1D6KUA6	100281495	A0A1D6KUA6;A0A1D6KUA5;A0A1D6KUA4;B4FXV2;B6SSI8;A0A317YAZ4;B6ST51	42;42;284;241;284;284;285	A0A1D6KUA6	0.000472216	42.585	1	S	LSRADTTLGMSMRSRSYNSEGGDIQVAIRSM	X;X;X;X;X;X;X;X;X;Oxidation (M);Phospho (STY);Oxidation (M);X;X;X;Phospho (STY);X;X;X;X;X;X;X;X;X;X;X;X;X;X;X	XXXXXXXXXXXXXPPPPPPPPPPPPPPPPXX	S(0.041)RS(0.935)Y(0.005)NS(0.02)EGGDIQVAIR	3	2	-0.62786			8306	8306	-2.5375	-2.84701	-2.9403	-1.90437	-1.34877	-1.98528	0.0117535	-1.02879	0.490119
A0A1D6KW92	103643638	A0A1D6KW92;A0A1D6KW91;A0A1D6KWA5;A0A1D6KWB0;A0A1D6KWA6;A0A1D6KWA7;A0A1D6KW97;A0A1D6KW95;A0A1D6KWA9;A0A1D6KW93	314;361;380;443;587;654;723;723;883;895	A0A1D6KW92	3.63e-06	52.052	1	S	LNSESWKPRTLTKLNSGFGINDILLLRKITR	X;X;X;X;X;X;X;X;X;X;X;X;X;X;X;Phospho (STY);X;X;X;X;X;X;X;X;X;X;X;X;X;X;X	XXXXXXXXXXXXXPPPPPPPPPPPPPPXXXX	LNS(1)GFGINDILLLR	3	3	1.274			5694;5695	5695	-0.93677	-1.2134	-1.09298	-0.508121	-0.0667725	-0.0141129	0.00733763	-0.884715	0.541594
A0A1D6KZS0	ZEAMMB73_Zm00001d033551	A0A1D6KZS0;A0A1D6KZS1;A0A1D6KZP8;A0A1D6KZQ9;A0A1D6KZQ0;A0A1D6KZP7;A0A1D6KZM8;A0A317Y4K6;A0A1D6KZN4;A0A1D6KZN2;A0A1D6KZP5;A0A1D6KZS3;A0A1D6KZR3;A0A1D6KZQ4;A0A1D6KZR2;A0A1D6KZP0	1081;927;1047;1040;1037;1032;1031;1031;998;997;823;412;642;640;540;482	A0A1D6KZS0	0.0048095	32.824	1	S	LGYFSKGAGVLERLASLWPFHKSANGK____	X;X;X;X;X;X;X;X;X;X;X;X;X;X;X;Phospho (STY);X;X;X;X;X;X;X;X;X;X;X;X;X;X;X	XXXXXXXXXXXXXPPPPPPPPPXXXXXXXXX	LAS(1)LWPFHK	3	3	0.22922			5280	5280	-4.28655	-3.87161	-4.91618	-2.03508	-1.75156	-2.12887	0.0018139	-2.38628	0.191275
A0A1D6KZS0	ZEAMMB73_Zm00001d033551	A0A1D6KZS0;A0A1D6KZS1;A0A1D6KZP8;A0A1D6KZQ9;A0A1D6KZQ0;A0A1D6KZP7;A0A1D6KZM8;A0A317Y4K6;A0A1D6KZN4;A0A1D6KZN2;A0A1D6KZP5;A0A1D6KZN6;A0A1D6KZP4;A0A1D6KZM7;A0A1D6KZN9;A0A1D6KZP1;A0A1D6KZQ1	399;245;365;358;355;350;382;382;358;315;141;350;350;358;350;141;185	A0A1D6KZS0	6.71e-125	195.16	1	S	KSEPVQPTEGLTRQGSGIIGTFGQSEELRCV	X;X;X;X;X;X;X;X;X;X;X;X;X;X;X;Phospho (STY);X;X;X;X;X;X;X;X;X;X;X;X;X;X;X	XXXXXXXXXXXXXPPPPPPPPPPPPPPPPXX	QGS(0.997)GIIGT(0.003)FGQSEELR	3	2	-0.61521			6690	6690	1.59913	1.5192	1.39412	2.18286	2.37943	2.33334	0.000702229	-0.794393	0.576586
A0A1D6L2J4	100191549	A0A1D6L2J4;C0PCC7;B4F972;A0A317YDP2	62;386;453;453	A0A1D6L2J4	1.26e-246	208.95	1	S	EKVLHELDALPARVPSGDLAALAAAESSERE	X;X;X;X;X;X;X;X;X;X;X;X;X;X;X;Phospho (STY);X;X;X;X;X;X;X;X;X;X;X;X;X;X;X	XXPPPPPPPPPPPPPPPPPPPPPPPPPPPPX	VPS(1)GDLAALAAAESSER	3	2	0.97634			9767;9768;9769;9852;9853;9854	9854	2.00399	2.14601	2.12537	3.76429	3.0657	3.89589	0.00475598	-1.48351	0.357619
A0A1D6L3E1	541769	A0A1D6L3E1;A0A1D6L3D9;A0A1D6L3D8;A0A1D6L3D6;A0A317YJ72;A0A1D6L3D7	167;167;161;167;181;181	A0A1D6L3E1	1.55e-12	83.882	1	S	AKASAIAPTILETGKSFTAKGMEVLERVGKE	X;X;X;X;X;X;X;X;X;X;X;X;X;X;X;Phospho (STY);X;X;X;X;X;X;X;X;X;X;X;X;X;X;X	XXPPPPPPPPPPPPPPPPPPXXXXXXXXXXX	ASAIAPTILET(0.006)GKS(0.929)FT(0.065)AK	14	3	1.6464			867	867	1.08163	1.1802	1.05079	2.04574	2.24735	2.06842	0.000169496	-1.01629	0.494385
A0A1D6L3U6	103643996	A0A1D6L3U6;A0A317YJ37;A0A1D6L3U5	219;241;338	A0A1D6L3U6	4.22e-17	114.76	1	S	FEHPLHEVKAVPRVDSQGQMCGSIFKVDSES	X;X;X;X;X;X;X;X;X;X;X;X;X;X;X;Phospho (STY);X;X;X;Oxidation (M);X;X;X;X;X;X;X;X;X;X;X	XXXXXXXXXXXXXPPPPPPPPPPPPPXXXXX	VDS(1)QGQMCGSIFK	3	3	-0.11538			9514;9515;9516;9517;9518;9519;9520;9521;9522	9522	3.28865	3.15219	3.17076	4.00852	4.00956	4.02925	4.74453e-05	-0.81191	0.569627
A0A1D6L3V5	ZEAMMB73_Zm00001d033984	A0A1D6L3V5;A0A1D6L3V3;A0A1D6L3U8;A0A1D6L3W0;A0A1D6L3V7;A0A1D6L3V1;A0A1D6L3V0;A0A317YJ38;A0A1D6L3U9	606;1406;871;1406;1101;1203;2599;2622;2644	A0A1D6L3V5	2.41e-74	156.79	1	S	TYDTEQRDLDAVEFSSFKDDDDIFKGGSTIS	X;X;X;X;X;X;X;X;X;X;X;X;X;X;X;Phospho (STY);X;X;X;X;X;X;X;X;X;X;X;X;X;X;X	XXXXXXXPPPPPPPPPPPPPPPPPPXXXXXX	DLDAVEFS(0.105)S(0.895)FKDDDDIFK	9	3	2.0531			1428	1428	0.98488	0.394908	0.383602	1.92524	1.37391	2.13723	0.0154176	-1.22433	0.427996
A0A317YHB5	Zm00014a_022495	A0A317YHB5;A0A1D6L4S2;B8YPX7	6;6;6	A0A317YHB5	0.00671954	28.919	1	S	__________MASRKSPVAAEERAGTGEGKG	X;X;X;X;X;X;X;X;X;X;X;X;X;X;X;Phospho (STY);X;X;X;X;X;X;X;X;X;X;X;X;X;X;X	XXXXXXXXXXXXXXPPPPPPPPPXXXXXXXX	KS(1)PVAAEER	2	3	0.3902			5116	5116	-1.35399	-1.80663	-1.9439	-0.829216	-0.929445	-0.711148	0.00969515	-0.878236	0.544032
A0A1D6L554	ZEAMMB73_Zm00001d034059	A0A1D6L554;B6SJA0;B4FAM6;A0A317YIZ6;A0A1D6L548;C0PNG8;A0A1D6L551;B6UGM0;B6TKD3;B6UE57;A0A1D6L549;C0HFM4;B6TG85;B6T8P1;A0A3L6ES94	26;26;26;26;26;26;26;26;26;26;26;26;26;26;26	C0HFM4	3.15e-05	9.6885	1	S	RIVVDARHHMLGRLSSIIAKELLNGQKVVVV	X;X;X;X;X;X;X;X;X;X;X;X;X;X;X;Phospho (STY);X;X;X;X;X;X;X;X;X;X;X;X;X;X;X	XXXXXXXXXXXXXPPPPPPPXXXXXXXXXXX	LS(0.153)S(0.847)IIAK	3	2	-0.28737			5923	5923	-1.38722	-1.75227	-1.32166	0.158622	0.145635	0.0761515	0.000291924	-1.61385	0.326725
Q32SG1	732821	Q32SG1;B7ZXL7;A0A317Y2X5;A0A1D6LBN4	88;88;88;163	Q32SG1	1.59e-05	50.882	1	S	HVNGDSAASAFRSLPSFKDVPNTEKQNLFNE	X;X;X;X;X;X;X;X;X;X;X;X;X;X;X;Phospho (STY);X;X;X;X;X;X;X;X;X;X;X;X;X;X;X	XXXXXXXXXXXXPPPPPPPPPPPPPXXXXXX	S(0.003)LPS(0.997)FKDVPNTEK	4	3	0.73513			8015	8015	-0.464842	-0.466772	-0.539477	0.357103	0.447959	0.419514	1.59426e-05	-0.898556	0.536423
A0A1D6LCQ0	103644346	A0A1D6LCQ0;A0A1D6LCQ3;A0A1D6LCQ2;A0A1D6LCQ1;A0A317YH63;A0A317YHL8	134;134;134;229;134;229	A0A1D6LCQ0	1.56e-144	207.4	1	S	LPTETAATESYPDYHSHKEDGATREASLPTD	X;X;X;X;X;X;X;X;X;X;X;X;X;X;X;Phospho (STY);X;X;X;X;X;X;X;X;X;X;X;X;X;Phospho (STY);X	PPPPPPPPPPPPPPPPPPPPPPPPXXXXXXX	LQNLPTETAAT(0.001)ES(0.042)YPDYHS(0.956)HKEDGAT(0.002)R	19	4	-0.32825			5806;5807;5808;5809	5809	-0.158803	-0.303654	-0.412303	0.379488	0.71174	0.627673	0.00221505	-0.864554	0.549216
A0A1D6LCQ0	103644346	A0A1D6LCQ0;A0A1D6LCQ3;A0A1D6LCQ2;A0A1D6LCQ1;A0A317YH63;A0A317YHL8;A0A1D6LCQ5	355;355;355;450;355;450;108	A0A1D6LCQ0	2.04e-234	222.39	1	S	GDGEETIVEDLYKGESELENQNKQLESTPPD	X;X;X;X;X;X;X;X;X;X;X;X;X;X;X;Phospho (STY);X;X;X;X;X;X;X;X;X;X;X;X;X;X;X	PPPPPPPPPPPPPPPPPPPPPPPXXXXXXXX	TSETGDGEETIVEDLYKGES(1)ELENQNK	20	4	-1.6217			9297;9298;9299	9297	1.88874	1.73543	1.86701	3.05226	3.27941	3.23536	8.72813e-05	-1.35862	0.389956
A0A3L6EDE0	PDCD4_1	A0A3L6EDE0;A0A1D6LEN8	36;36	A0A3L6EDE0	1.58e-95	180.49	1	S	IAVQNAETQSLASPRSPTGGTTSALLQQYEL	X;X;X;X;X;X;X;X;X;X;X;X;Phospho (STY);X;X;Phospho (STY);X;X;X;X;X;X;X;X;X;X;X;X;X;X;X	XXXXXXXXXXXXXXXPPPPPPPPPPPPPPPP	S(0.798)PT(0.202)GGTTSALLQQYELQMLEQK	1	3	-0.55333			8223;8224;8226	8223	2.34946	2.29631	2.305	3.28503	3.39329	3.44992	3.19987e-05	-1.05916	0.479912
A0A3L6EDE8	Os05g0113900_0	A0A3L6EDE8;A0A1D6LHK9;A0A1D6LHK7;A0A1D6LHK8	146;146;101;258	A0A3L6EDE8	0.000814315	50.465	1	S	KAAERAEKAAAAGPKSPKKVAAKSPKK____	X;X;X;X;X;X;X;X;X;X;X;X;X;X;X;Phospho (STY);X;X;X;X;X;X;X;X;X;X;X;X;X;X;X	XXXXXXXXPPPPPPPPPPPXXXXXXXXXXXX	AAAAGPKS(1)PKK	8	3	1.0076			9;10;11;12;13	13	1.214	1.2298	1.31792	3.70576	3.56193	3.68415	1.68595e-06	-2.39671	0.189897
A0A1D6LKN8	ZEAMMB73_Zm00001d036090	A0A1D6LKN8;A0A1D6LKN9;A0A3L6E8F5	50;50;50	A0A1D6LKN8	1.93e-05	45.868	1	S	RVSSAGGAGAYRRTSSGPLPAAAGGRAASDG	X;X;X;X;X;X;X;X;X;X;X;X;X;X;X;Phospho (STY);X;X;X;X;X;X;X;X;X;X;X;X;X;X;X	XXXXXXXXXXXXXPPPPPPPPPPPPPXXXXX	T(0.082)S(0.015)S(0.904)GPLPAAAGGR	3	2	0.24986			9331	9331	-1.24412	-1.19345	-1.93402	-0.750364	-0.797583	-0.696502	0.0421129	-0.709048	0.611724
A0A1D6LR31	103629715	A0A1D6LR31;A0A3L6EEC0;A0A1D6LR28	110;674;698	A0A1D6LR31	7.17e-05	55.81	1	S	QLVRLMQRAAIIRRQSDDLGYSYRVPDRDGG	X;X;X;X;X;X;X;X;X;X;X;X;X;X;X;Phospho (STY);X;X;X;X;X;X;X;X;X;X;X;X;X;X;X	XXXXXXXXXXXXXPPPPPPPPPPPXXXXXXX	RQS(1)DDLGYSYR	3	3	-0.20743			7209	7209	-0.649826	-0.773685	-0.719218	-0.0468723	-0.107887	-0.19595	0.000443213	-0.59734	0.660972
A0A1D6LSW1	103629816	A0A1D6LSW1;A0A1D6LSU1;A0A1D6LSW2;A0A1D6LSV9;A0A1D6LSY6;A0A1D6LSY7;A0A1D6LSU2;A0A1D6LSV5;A0A1D6LSY9;A0A1D6LSY0;A0A1D6LSU9;A0A1D6LSU6;A0A1D6LSV4	687;709;687;572;687;687;711;687;147;147;147;147;404	A0A1D6LSW1	0.00441817	24.082	1	S	YKKSKAEREQLTVKKSPGDPKEQMQGELNDG	X;X;X;X;X;X;X;X;X;X;X;X;X;X;X;Phospho (STY);X;X;X;X;X;X;X;X;X;X;X;X;X;X;X	XXXXXXXXXXXXXXPPPPPPPPPPPPPPPPP	KS(1)PGDPKEQMQGELNDGK	2	4	0.7543			5110	5110	-2.80601	-2.11643	-2.27372	-1.23518	-0.952223	-1.44188	0.00922757	-1.18896	0.438619
A0A1D6LT46	103629823	A0A1D6LT46;A0A1D6LT34;A0A1D6LT44;A0A1D6LT35;A0A1D6LT29;A0A1D6LT27;A0A3L6E5V9;A0A1D6LT23;A0A1D6LT24	394;466;508;525;582;604;884;873;881	A0A1D6LT46	1.25e-05	43.179	1	S	ARLSNCSSNGVSRLMSIGSNEAAPTRGMVLP	X;X;X;X;X;X;X;X;X;X;X;X;X;X;Oxidation (M);Phospho (STY);X;X;X;X;X;X;X;X;X;X;X;X;X;X;X	XXXXXXXXXXXXXPPPPPPPPPPPPPXXXXX	LMS(1)IGSNEAAPTR	3	2	-0.51344			5671;5672;5673	5671	-0.182181	-0.417131	-0.360942	0.915074	1.13827	1.1162	0.00016325	-1.3766	0.385125
A0A1D6LTM1	100381411	A0A1D6LTM1;A0A1D6LTK6;A0A1D6LTL9;A0A3L6E4Y8;A0A1D6LTK7	133;112;133;133;133	A0A1D6LTM1	0.000227988	47.813	1	S	HWGALRPDKRDWILPSRKPDGTTVYKNRALR	X;X;X;X;X;X;X;X;X;X;X;X;X;X;X;Phospho (STY);X;X;X;X;X;X;X;X;X;X;X;X;X;X;X	XXXXXXXXXXPPPPPPPPPPPPPPPPXXXXX	DWILPS(0.97)RKPDGT(0.014)T(0.016)VYK	6	4	-0.52395			1622	1622	-0.60288	-0.662607	-0.723301	0.159953	0.267516	0.183728	5.38399e-05	-0.866662	0.548414
A0A1D6LVZ8	103629948	A0A1D6LVZ8;A0A3L6ED99;A0A1D6LVZ7	401;504;504	A0A1D6LVZ8	0.00151949	23.904	1	S	ADDTKSADDVKPSVASPDAKSTDDVKSSENN	X;X;X;X;X;X;X;X;X;X;X;X;X;X;X;Phospho (STY);X;X;X;X;X;X;X;X;X;X;X;X;X;X;X	XXXXXPPPPPPPPPPPPPPPXXXXXXXXXXX	S(0.001)ADDVKPS(0.005)VAS(0.994)PDAK	11	4	0.90046			7396	7396	-2.0181	-1.80746	-1.90323	-1.40348	-1.1793	-1.25184	0.00215873	-0.631388	0.645555
A0A1D6LVZ8	103629948	A0A1D6LVZ8;A0A3L6ED99;A0A1D6LVZ7;A0A1D6LVZ6	664;767;767;159	A0A1D6LVZ8	2.53e-136	192.53	1	S	TEKVESVAGTLKPSQSDTALQEILERNMATE	X;X;X;X;X;X;X;X;X;X;X;X;X;X;X;Phospho (STY);X;X;X;X;X;X;X;X;X;X;X;X;X;X;X	XXXPPPPPPPPPPPPPPPPPPPPPPPXXXXX	VESVAGTLKPS(0.004)QS(0.996)DT(0.001)ALQEILER	13	4	1.1414			9598;9599	9599	0.842343	0.735019	0.780635	1.98927	1.98738	1.80498	7.63768e-05	-1.14121	0.453379
A0A3L6ECH2	GMII_1	A0A3L6ECH2;A0A1D6LW38	32;32	A0A3L6ECH2	6.4e-07	92.966	1	S	PTTSKPKAHHHLRSKSSLSVPAFSRRRGGLY	X;X;X;X;X;X;X;X;X;X;X;X;X;X;X;Phospho (STY);X;X;X;X;X;X;X;X;X;X;X;X;X;X;X	XXXXXXXXXXXXXPPPPPPPPPPPPXXXXXX	S(0.018)KS(0.889)S(0.085)LS(0.009)VPAFSR	3	2	2.0442			7951;7952	7951	0.463182	0.699829	0.584397	1.72062	1.83174	1.6952	0.00012958	-1.16672	0.445433
B4F9H3	100191619	B4F9H3;A0A1D6LWY3;A0A1D6LWY1;A0A1D6LWY2	62;62;62;62	B4F9H3	4.92e-14	103.25	1	S	RLCRAVLANYDEELSSPKFAPPEHGYFDIDP	X;X;X;X;X;X;X;X;X;X;X;X;X;X;X;Phospho (STY);X;X;X;X;X;X;X;X;X;X;X;X;X;X;X	XXXXPPPPPPPPPPPPPPXXXXXXXXXXXXX	AVLANYDEELS(0.169)S(0.831)PK	12	2	-0.41865			1200;1201	1201	0.698218	0.730131	0.807268	1.76309	1.56061	1.82497	0.00035294	-0.971017	0.510146
A0A1D6LX75	ZEAMMB73_Zm00001d037377	A0A1D6LX75;A0A1D6LX72;A0A1D6LX71;A0A1D6LX99;A0A1D6LX76;A0A1D6LX69;A0A1D6LXA4;A0A1D6LX93;A0A1D6LXA1;A0A1D6LXA2;A0A1D6LXB9;A0A1D6LXD0;A0A1D6LXC0;A0A1D6LXE0;A0A3L6EA12;A0A1D6LXC5;A0A1D6LXC1;A0A1D6LXB0;A0A1D6LXD2;A0A1D6LXD6;A0A1D6LX70;A0A1D6LXD5;A0A1D6LX96;A0A1D6LXC6;A0A1D6LXB8;A0A1D6LXC7;A0A1D6LXD1;A0A1D6LX92;A0A1D6LXE3	1098;346;406;531;583;1094;644;1125;723;1125;107;1125;1078;1125;1139;1125;1125;1125;1134;1115;1125;1125;1125;723;1125;1098;1125;1125;1125	A0A1D6LX75	0.000236394	40.465	1	S	AHFEAVRTANMDKVESPKHKMLIDVTDEFGN	X;X;X;X;X;X;X;X;X;X;X;X;X;X;X;Phospho (STY);X;X;X;X;X;X;X;X;X;X;X;X;X;X;X	XXXXXXXPPPPPPPPPPPPPXXXXXXXXXXX	TANMDKVES(1)PKHK	9	5	0.40766			8872;8873	8873	-0.34365	-0.558974	-0.741054	0.396568	0.672231	0.461443	0.00172581	-1.05797	0.480306
A0A1D6M0I5	ZEAMMB73_Zm00001d037794	A0A1D6M0I5;C0PJZ2;B6TF16	9;9;9	A0A1D6M0I5	1.63e-05	74.469	1	S	_______MAYLLKSRSKPVQQLLVPASSEEQ	X;X;X;X;X;X;X;X;X;X;X;X;X;X;X;Phospho (STY);X;X;X;X;X;X;X;X;X;X;X;X;X;X;X	XXXXXXXXXXXXXXXPPPPPPPPPPPPPPPP	S(1)KPVQQLLVPASSEEQQR	1	3	0.32941			7919	7919	-0.557025	-0.319654	-0.677434	0.0879634	0.273073	0.201075	0.00394833	-0.705408	0.613269
A0A3L6E5K9	MLO1_2	A0A3L6E5K9;A0A1D6M4G8	214;214	A0A3L6E5K9	0.00557409	29.212	1	S	AAENGPKKVLPMHQVSFIRERYKGIGTDSKT	X;X;X;X;X;X;X;X;X;X;X;Oxidation (M);X;X;X;Phospho (STY);X;X;X;X;X;X;X;X;X;X;X;X;X;X;X	XXXXXXXPPPPPPPPPPPPXXXXXXXXXXXX	KVLPMHQVS(1)FIR	9	4	0.14135			5159	5159	-3.3811	-3.70164	-3.80516	-2.01403	-2.31397	-2.43578	0.00154189	-1.37471	0.385631
A0A1D6M791	103630545	A0A1D6M791;A0A1D6M799;A0A1D6M793;A0A1D6M797;A0A1D6M796;A0A1D6M794;A0A3L6EEB6;A0A1D6M795	145;135;135;135;135;128;135;135	A0A1D6M791	0.000403684	39.896	1	S	KKAGRESEMDEHSGFSDGDGTGKKRSGKERV	X;X;X;X;X;X;X;X;Oxidation (M);X;X;X;X;X;X;Phospho (STY);X;X;X;X;X;X;X;X;X;X;X;X;X;X;X	XXXXXPPPPPPPPPPPPPPPPPPXXXXXXXX	ESEMDEHS(0.046)GFS(0.945)DGDGT(0.009)GK	11	3	0.19129			1975;1976	1976	-1.22557	-1.8128	-1.46285	-0.853179	-0.635823	-0.516121	0.0134473	-0.832028	0.561739
A0A3L6EET7	Zm00014a_013669	A0A3L6EET7;A0A1D6M7B4	52;52	A0A3L6EET7	0.0032453	29.04	1	S	VGLVVRNRRRRFRMFSGLHALDDAQRRNILG	X;X;X;X;X;X;X;X;X;X;X;X;X;Oxidation (M);X;Phospho (STY);X;X;X;X;X;X;X;X;X;X;X;X;X;X;X	XXXXXXXXXXXXXPPPPPPPPPPPPPXXXXX	MFS(1)GLHALDDAQR	3	3	0.93099			6133	6133	-2.71863	-2.27656	-2.93581	-1.88039	-1.46623	-1.91259	0.0210333	-0.890597	0.539391
A0A3L6E6I8	CSLC7_0	A0A3L6E6I8;A0A1D6M9Q6	621;622	A0A3L6E6I8	6.01e-11	86.488	1	S	LVALVEKHSKQQRVGSAPNLDALTKESKDAE	X;X;X;X;X;X;X;X;X;X;X;X;X;X;X;Phospho (STY);X;X;X;X;X;X;X;X;X;X;X;X;X;X;X	XXXXXXXXXXXXXPPPPPPPPPPPPXXXXXX	VGS(1)APNLDALTK	3	2	-0.59439			9662;9663	9663	2.04052	2.02286	1.9223	2.50132	2.67721	2.5983	0.000682883	-0.597047	0.661106
A0A3L6E738	IQD31_1	A0A3L6E738;A0A1D6MB54	345;345	A0A3L6E738	9.44e-08	94.659	1	S	LTELEKVKRSLRKVTSSTVETSKVPSPTTEI	X;X;X;X;X;X;X;X;X;X;X;X;X;X;X;Phospho (STY);X;X;X;X;X;X;X;X;X;X;X;X;X;X;X	XXXXXXXXXXXXPPPPPPPPPPPXXXXXXXX	VT(0.016)S(0.968)S(0.016)TVETSK	3	2	-0.72455			5199;5200;10047	10047	1.24368	1.27794	1.0597	2.04408	1.76432	2.06507	0.00295703	-0.76405	0.588841
C4J0F8	100284901	C4J0F8;B6TZY4;B4FYR2;A0A3L6EDL3;A0A1D6MBG0;A0A1D6MBF3;A0A1D6FJA5;B6SQA2;B4FM15;A0A3L6DTX4;A0A1D6FJA8	18;18;18;18;18;64;18;18;18;18;18	C4J0F8	0.00102156	27.932	1	S	TVPGDLIWQVVRKNNSFLVKQFGNGNAKVQF	X;X;X;X;X;X;X;X;X;X;X;X;X;X;X;Phospho (STY);X;X;X;X;X;X;X;X;X;X;X;X;X;X;X	XXXXXXXXXXXXPPPPPPPPXXXXXXXXXXX	KNNS(1)FLVK	4	3	-0.50005			4939	4939	-1.56538	-1.54178	-1.80287	-0.215329	0.0137424	-0.264592	0.000244308	-1.48128	0.35817
B4FJT2	100216801	B4FJT2;A0A1D6MEB3;A0A3L6EIH6;B6UHT1	116;116;116;116	B4FJT2	0.00104456	34.427	1	S	TARSAPPPPPPTHTDSAVNPLRFDARTIHFS	X;X;X;X;X;X;X;X;X;X;X;X;X;X;X;Phospho (STY);X;X;X;X;X;X;X;X;X;X;X;X;X;X;X	XXXPPPPPPPPPPPPPPPPPPPXXXXXXXXX	SAPPPPPPT(0.009)HT(0.196)DS(0.795)AVNPLR	13	3	-1.0505			7428	7428	-1.73786	-1.63287	-1.69128	-0.34793	-0.592681	-0.26375	0.000238792	-1.28588	0.41012
A0A1D6MEW4	ZEAMMB73_Zm00001d039270	A0A1D6MEW4	118	A0A1D6MEW4	9.07e-05	53.837	2	S	MKPVLDSKSPPAPAPSPKKKKTKKKKKKKTK	Oxidation (M);X;X;X;X;X;Phospho (STY);X;Phospho (STY);X;X;X;X;X;X;Phospho (STY);X;X;X;X;X;X;X;X;X;X;X;X;X;X;X	PPPPPPPPPPPPPPPPPPXXXXXXXXXXXXX	ALEDMKPVLDS(0.462)KS(0.54)PPAPAPS(0.998)PK	20	4	-0.097686			538;540	540	0.570389	0.613469	0.470279	1.57905	1.74361	1.50408	0.000213287	-1.05753	0.480453
A0A1D6MJW2	100384030	A0A1D6MJW2;A0A1D6MJV3;A0A1D6MJV7;A0A1D6MJW3;A0A3L6FDE1;A0A1D6MJV5	755;606;804;494;819;804	A0A1D6MJW2	4.29e-07	68.199	1	S	NDRVALELRSYLHSNSLSGNLKEQKGMVLPF	X;X;X;X;X;X;X;X;X;X;X;X;X;X;X;Phospho (STY);X;X;X;X;X;X;X;X;X;X;X;X;X;X;X	XXXXXXXXXPPPPPPPPPPPPPXXXXXXXXX	SYLHSNS(0.993)LS(0.007)GNLK	7	3	0.69539			8758	8758	-1.44992	-1.2098	-1.13439	-0.258782	-0.334219	-0.247274	0.000573215	-0.98461	0.505362
A0A1D6MJX6	ZEAMMB73_Zm00001d039639	A0A1D6MJX6;A0A317YER7;A0A1D6L0B7;A0A3L6FLJ0;A0A1D6MQF4;A0A1D6M6G2;A0A1D6M6G3;A0A3L6FDS6;A0A1D6MQF3	341;149;149;341;26;78;26;179;337	A0A1D6MJX6	0.000103166	45.479	1	S	FSEHGKLNRLAELSASFSGQRSPSPSPNPAL	X;X;X;X;X;X;X;X;X;X;X;X;X;X;X;Phospho (STY);X;X;X;X;X;X;X;X;X;X;X;X;X;X;X	XXXXXXXXXPPPPPPPPPPPPPPPPPPPPPP	LAELS(0.138)AS(0.844)FS(0.018)GQR	7	2	2.6795			5236	5236	-0.481582	-0.218473	-0.349701	0.248747	0.253657	0.321348	0.00141782	-0.624502	0.648644
A0A1D6MPH1	ZEAMMB73_Zm00001d040257	A0A1D6MPH1;A0A1D6MPG6;A0A1D6MPG8;A0A1D6MPG7;G2XK63;B6T8X5;A0A3L6FD59;A0A1D6MPH2;B4F8E0;A0A1D6FC95;A0A1D6MPG5;A0A1D6MPH3;A0A1D6MPH4;A0A3L6DUW7;A0A1D6FC96;K7UPD0	253;231;240;250;253;253;253;129;17;253;101;142;129;228;229;253	A0A1D6MPH1	0.0161266	30.458	1	S	DTDKVKIYGARVRVDSMSKVADIEAAEKQKM	X;X;X;X;X;X;X;X;X;X;X;X;X;X;X;Phospho (STY);X;X;X;X;X;X;X;X;X;X;X;X;X;X;X	XXXXXXXXXXXPPPPPPPPXXXXXXXXXXXX	VRVDS(0.997)MS(0.003)K	5	3	0.28922			9897	9897	-1.66367	-0.930201	-1.42282	-0.482258	0.063229	-0.41507	0.0183643	-1.06086	0.479346
A0A1D6MPR0	103649954	A0A1D6MPR0;A0A1D6MPQ2;A0A1D6MPQ6;A0A1D6MPP8;A0A1D6MPP9;A0A1D6MPR2;A0A1D6MPP7;A0A1D6MPR5;A0A1D6MPR3;A0A1D6MPR7	724;687;689;734;742;708;708;712;724;230	A0A1D6MPR0	0.0305925	13.2	1	S	AKPSPILNGGDTASRSIDIKPRISEEKPDKA	X;X;X;X;X;X;X;X;X;X;X;X;X;X;X;Phospho (STY);X;X;X;X;X;X;X;Phospho (STY);X;X;X;X;X;X;X	XXXXXXXXXXXXXXXPPPPPPPXXXXXXXXX	S(1)IDIKPR	1	3	-0.20031			7839	7839	-2.594	-2.40632	-2.52039	-1.50747	-2.13333	-1.55182	0.0205652	-0.776032	0.583971
A0A1D6MRP6	ZEAMMB73_Zm00001d040612	A0A1D6MRP6;A0A1D6MRP7;A0A1D6MRQ7;A0A1D6MRR1;A0A1D6MRQ4;A0A1D6MRQ0;A0A3L6FBV2;A0A1D6MRP3	554;608;759;790;811;859;876;878	A0A1D6MRP6	0.00133433	46.613	1	S	RGSSRDSPRALINSISGRWNLSNDPSTPSGG	X;X;X;X;X;X;X;X;X;X;X;X;X;X;X;Phospho (STY);X;X;X;X;X;X;X;X;X;X;X;X;X;X;X	XXXXXXXXXPPPPPPPPPXXXXXXXXXXXXX	ALINS(0.003)IS(0.997)GR	7	2	-0.97479			560	560	-1.27418	-1.54464	-1.58517	-0.528961	-0.284966	-0.454075	0.000999607	-1.04533	0.484535
A0A1D6MSM1	103650148	A0A1D6MSM1;A0A1D6MSL6;A0A1D6MSJ1;A0A3L6FK03;A0A1D6MSS1;A0A1D6MSS3;A0A1D6MSP6;A0A1D6MSJ0;A0A1D6MSI9;A0A1D6MSS4;A0A1D6MSR9;A0A1D6MSN5;A0A1D6MSP3;A0A1D6MSJ3;A0A1D6MSR3;A0A1D6MSI6;A0A1D6MSJ2	257;675;746;732;727;707;703;546;531;304;633;753;578;507;492;307;792	A0A1D6MSM1	0.000132866	47.383	1	S	QRGLEKEEEDYFNEDSDEEDSGSGRRAKHAQ	X;X;X;X;X;X;X;X;X;X;X;X;X;X;X;Phospho (STY);X;X;X;X;X;X;X;X;X;X;X;X;X;X;X	XXPPPPPPPPPPPPPPPPPPPPPPPXXXXXX	GLEKEEEDY(0.002)FNEDS(0.959)DEEDS(0.02)GS(0.02)GR	14	3	-1.0896			3443	3443	-2.40219	-1.97493	-2.71176	-1.4031	-1.41279	-1.39694	0.0109311	-0.958683	0.514526
A0A1D6MV10	ZEAMMB73_Zm00001d041192	A0A1D6MV10;U5Y1J4;Q6J2T0;Q6GUI0;A0A3L6FMJ0;A0A1D6MV11;A0A1D6MV15;A0A1D6MV12	319;493;493;493;493;493;313;395	A0A1D6MV10	0.00322215	14.925	1	S	VAILGLPRARIASSSSRRRGGTHR_______	X;X;X;X;X;X;X;X;X;X;X;X;X;X;X;Phospho (STY);X;X;X;X;X;X;X;X;X;X;X;X;X;X;X	XXXXXXXXXXPPPPPPPXXXXXXXXXXXXXX	IAS(0.002)S(0.004)S(0.031)S(0.963)R	6	2	-0.0045166			4083	4083	-0.814912	-0.557529	-0.797372	0.554851	0.394349	0.311194	0.000476513	-1.1434	0.452691
A0A1D6MXF8	ZEAMMB73_Zm00001d041632	A0A1D6MXF8;A0A1D6MXF2;A0A1D6MXF4;A0A1D6MXF3;A0A3L6FBQ0	338;477;505;521;557	A0A1D6MXF8	3.71e-60	140.01	1	S	PSLLLREANRRRAFLSAGNLSELYDSSDGSG	X;X;X;X;X;X;X;X;X;X;X;X;X;X;X;Phospho (STY);X;X;X;X;X;X;X;X;X;X;X;X;X;X;X	XXXXXXXXXXXXPPPPPPPPPPPPPPPPPPP	AFLS(0.988)AGNLS(0.012)ELYDSSDGSGLDANSK	4	3	3.25			293;294	293	0.0168307	-0.0360952	-0.143838	0.743473	0.904212	0.710143	0.000386676	-0.84031	0.558523
A0A1D6N360	103650849	A0A1D6N360;A0A1D6N358;A0A3L6FED5	90;141;137	A0A3L6FED5	2.23e-125	184.67	1	S	EQVRREATEDLADDLSEGEKGDTLAELVPVE	X;X;X;X;X;X;X;X;X;X;X;X;X;X;X;Phospho (STY);X;X;X;X;X;X;X;X;X;X;X;X;X;X;X	XXXXPPPPPPPPPPPPPPPPPPPPPPPPPPP	EATEDLADDLS(1)EGEKGDTLAELVPVEAAK	11	4	-0.25725			1676;1677;6952	1676	0.894868	0.921998	0.947942	2.4687	2.69088	2.48784	2.35969e-05	-1.62754	0.32364
A0A1D6N8W2	ZEAMMB73_Zm00001d043093	A0A1D6N8W2;A0A1D6N8L7;A0A1D6N8M8;A0A1D6N8T2;A0A1D6N8S0;A0A1D6N8R0;A0A1D6N8L3;A0A1D6N8M2;A0A1D6N8L1;A0A1D6N8P9;A0A1D6N8Q8;A0A1D6N8W1;A0A3L6FFH4;A0A1D6N8L6;A0A1D6N8L4;A0A1D6N8N5;A0A1D6N8M7;A0A1D6N8M0;A0A1D6N8T4;A0A1D6N8T6;A0A1D6N8N8;A0A1D6N8S1;A0A1D6N8P0;A0A1D6N8V5;A0A1D6N8Q6;A0A1D6N8V9;A0A1D6N8V6;A0A1D6N8V3;A0A1D6N8U7;A0A1D6N8P6;A0A1D6N8P1;A0A1D6N8M3;A0A1D6N8U6;A0A1D6N8U5;A0A1D6N8R1;A0A1D6N8U3;A0A…	534;1812;1878;1507;1701;1740;1757;1873;1791;1835;1060;588;1849;1847;1853;1870;1873;1873;1422;1398;1398;1342;1361;616;771;785;920;959;991;1114;1834;1114;1147;1170;1219;1284;1341;1889	A0A1D6N8W2	5.43e-07	80.17	1	S	TPPPIAAIPSPKLAPSPVHTKSIGSKTDYNE	Phospho (STY);X;X;X;X;X;X;X;X;Phospho (STY);X;X;X;X;X;Phospho (STY);X;X;X;X;X;X;X;X;X;X;X;X;X;X;X	XXXXXXXXXXXXPPPPPPPPPXXXXXXXXXX	LAPS(1)PVHTK	4	3	0.72864			5260;5261	5261	0.347365	0.145842	0.252096	0.877297	1.06952	1.08941	0.00102353	-0.763641	0.589008
A0A1D6NBN4	103651198	A0A1D6NBN4;A0A1D6NBN2;A0A1D6NBP7;A0A1D6NBP8;A0A1D6NBP1;A0A1D6NBM6;A0A1D6NBP3;A0A3L6FCQ5;A0A1D6NBP0;A0A1D6NBM9;A0A1D6NBN0	148;735;827;860;871;1020;1027;1067;1067;1075;1095	A0A1D6NBN4	1.5e-32	114.58	1	S	GGFRRQPQRRLDRGTSTVSQLFKGQEDGAAL	X;X;X;X;X;X;X;X;X;X;X;X;X;X;X;Phospho (STY);X;X;X;X;X;X;X;X;X;X;X;X;X;X;X	XXXXXXXXXXXXXPPPPPPPPPPXXXXXXXX	GTS(0.817)T(0.154)VS(0.029)QLFK	3	2	0.76758			3702;3703	3702	0.799377	0.550982	0.658727	1.73503	1.74028	1.91937	0.000276354	-1.12853	0.457381
C0PPA1	ZEAMMB73_Zm00001d043800	C0PPA1;A0A1D6NF28;A0A1D6NF23;A0A3L6FT85;A0A1D6NF24;A0A1D6NF25	83;321;392;617;689;332	C0PPA1	0.0027402	33.433	1	S	LFVRRKRKQKRVVNSSSKLLKYSGSGGTPRS	X;X;X;X;X;X;X;X;X;X;X;X;X;X;X;Phospho (STY);X;X;X;X;X;X;X;X;X;X;X;X;X;X;X	XXXXXXXXXXXPPPPPPPXXXXXXXXXXXXX	VVNS(0.159)S(0.81)S(0.031)K	5	2	1.4107			10097	10097	-1.17547	-1.16525	-1.62941	-0.77975	-0.39633	-0.824638	0.0326718	-0.656471	0.634428
A0A1D6NG68	103651372	A0A1D6NG68;A0A3L6D8U8;A0A1D6NG52;A0A1D6NG59;A0A1D6NG46;A0A3L6FGA4;A0A1D6NG47	306;609;865;935;956;1035;1035	A0A1D6NG68	0.00403711	27.647	1	S	SSRIGSSRHDGVAGGSGYYSRASSSHALSRA	X;X;X;X;X;X;X;X;X;X;X;X;X;X;X;Phospho (STY);X;X;X;X;X;X;Phospho (STY);X;X;X;X;X;X;X;X	XXXXXXXXPPPPPPPPPPPPPXXXXXXXXXX	HDGVAGGS(0.95)GY(0.007)Y(0.007)S(0.037)R	8	2	-0.63021			3799;3800	3800	-1.97488	-1.45165	-1.5727	-0.99306	-0.849514	-0.963765	0.0112072	-0.730963	0.602502
A0A1D6NKQ6	ZEAMMB73_Zm00001d044303	A0A1D6NKQ6;A0A1D6NKQ1;A0A1D6NKQ3;A0A1D6NKP6;A0A1D6NKQ4;A0A3L6FM97;Q9XEI4;A0A1D6NKQ5	545;587;750;949;999;1103;1055;1055	A0A1D6NKQ6	1.77e-05	83.961	1	S	MESENKVLRQQAVAISPTSKSLAAYPKSPFQ	X;X;X;X;X;X;X;X;X;X;X;X;X;X;X;Phospho (STY);X;X;X;X;X;X;X;X;X;X;X;X;X;X;X	XXXXXXXXXPPPPPPPPPPPXXXXXXXXXXX	QQAVAIS(0.993)PT(0.007)S(0.001)K	7	2	-0.69284			6803;6804	6803	-0.0356198	-0.279468	-0.104532	0.447695	0.743889	0.57732	0.0028986	-0.729508	0.60311
K7V9A1	100384406	K7V9A1;A0A1D6NS45;A0A1D6NS55;A0A1D6NS51;A0A1D6NS47;A0A1D6NS20;K7W532;A0A1D6NS54;A0A1D6NS56;A0A3L6DAB4;A0A1D6NS37;A0A1D6NS28;A0A1D6Q0T6;A0A1D6QHS5	692;702;399;464;125;129;158;187;197;692;692;692;110;315	A0A3L6DAB4	4.42e-59	146.89	1;2	S	GQGREIGRSDSSKSRSPDVFASPVSQDKTGN;GQGREIGRSDSSKSRSPDVFASPVSQDKTGY	X;X;X;X;X;X;X;X;X;X;Phospho (STY);X;X;X;X;Phospho (STY);X;X;X;X;X;X;X;X;X;X;X;X;X;X;X	XXXXXXXXPPPPPPPPPPPPPPPPPPPPXXX	S(1)PDVFASPVSQDK	1	2	0.70836			7587;8158;8159;8298;8299;8300	8159	2.54724	2.53984	2.48899	3.23069	3.00182	3.34343	0.00284755	-0.666624	0.629979
A0A1D6NTY5	ZEAMMB73_Zm00001d045139	A0A1D6NTY5;A0A1D6NTY4;K7VRI2;C0P8F2	44;44;44;44	A0A1D6NTY5	3.4e-05	44.491	1	S	VVVSRVKLSPAASGGSGGKAGYADSLIEEEE	X;X;X;X;X;X;X;X;X;X;X;X;X;X;X;Phospho (STY);X;X;X;X;X;X;X;X;Phospho (STY);X;X;X;X;X;X	XXXXXXXPPPPPPPPPPPPXXXXXXXXXXXX	LSPAAS(0.002)GGS(0.998)GGK	9	3	-0.71507			5903	5903	-0.757105	-0.912451	-0.508257	0.630059	-0.100885	-0.231692	0.0479391	-0.825098	0.564444
A0A1D6NYD7	100502506	A0A1D6NYD7;C4JC39;A0A3L6D8N1;A0A1D6NL42	493;510;493;174	A0A1D6NYD7	1.14e-68	133.5	1	S	VDQTLVHQSKSFLANSFLSRYDSASTIDGFK	X;X;X;X;X;X;X;X;X;X;X;X;X;X;X;Phospho (STY);X;X;X;X;X;X;Phospho (STY);X;X;X;X;X;X;X;X	XXXXXXXXXXPPPPPPPPPPXXXXXXXXXXX	SFLANS(1)FLSR	6	2	1.1312			7652	7652	0.919546	0.948032	0.990844	1.88278	1.79372	1.91104	2.43682e-05	-0.909706	0.532293
A0A1D6P099	ZEAMMB73_Zm00001d045967	A0A1D6P099;A0A1D6P096;A0A1D6P0A0;A0A1D6P094;A0A3L6DHX6;A0A1D6P095;A0A1D6P098	270;336;336;309;309;309;336	A0A1D6P099	1.29e-23	99.99	1	S	ESKEQLSQKEYIRGISGWNFNLEDLKNAAAL	X;X;X;X;X;X;X;X;X;X;X;X;X;X;X;Phospho (STY);X;X;X;X;X;X;X;X;X;X;X;X;X;X;X	XXXXXXXXXXXXXPPPPPPPPPPPPPXXXXX	GIS(1)GWNFNLEDLK	3	3	-2.0407			3390;3391	3391	0.482589	0.362297	0.424523	1.27697	1.4461	1.23053	0.00027041	-0.89473	0.537848
B7ZWZ2		B7ZWZ2;B6SW46;B4FAX5;A0A1D6P1C0;A0A1D6P1C1	459;459;459;463;470	B7ZWZ2	6.92e-45	103.69	1	S	RRQIANPARPTRTLTSFARGVRRGGENQGVD	X;X;X;X;X;X;X;X;X;X;X;X;X;X;X;Phospho (STY);X;X;X;X;X;X;X;X;X;X;X;X;X;X;X	XXXXXXXXXXXXPPPPPPPXXXXXXXXXXXX	TLT(0.001)S(0.999)FAR	4	2	-0.40472			9194	9194	-1.17173	-0.827192	-1.11934	0.733727	1.01934	0.914765	0.000142834	-1.9287	0.262666
A0A1D6P1E3	ZEAMMB73_Zm00001d046221	A0A1D6P1E3;A0A3L6D8Q1;A0A1D6P1E1;A0A1D6P1C9;A0A1D6P1E2;A0A1D6P1F7;A0A1D6P1G2;A0A1D6P1F1;A0A1D6P1D4;A0A1D6P1H5;A0A1D6P1G3;A0A1D6P1G8;A0A1D6P1G7;A0A1D6P1F3;A0A1D6P1H0;A0A1D6P1G0;A0A1D6P1F2;A0A1D6P1F4;A0A1D6P1G9	737;743;737;722;741;711;711;722;722;596;711;711;421;711;164;91;164;164;164	A0A1D6P1E3	0.0120369	18.447	1	S	SKEQMQVSGELNKGKSLDADQLKEGGVGCSD	Phospho (STY);X;X;X;X;X;X;X;X;X;X;X;X;X;X;Phospho (STY);X;X;X;X;X;X;X;X;X;X;X;X;X;X;X	XXXXXXXXXXXXXPPPPPPPPPPXXXXXXXX	GKS(1)LDADQLK	3	3	-0.5976			3425	3425	-1.27402	-1.13879	-1.2783	-0.515987	-0.680333	-0.600541	0.00066508	-0.631414	0.645543
A0A1D6P1Z4	103638587	A0A1D6P1Z4;A0A1D6P1Y3;A0A1D6P1Y9;K7V9W2;A0A1D6P1X9;A0A1D6P1X2;A0A3L6DH76;A0A1D6P1W8;A0A1D6P1W9	299;466;508;525;582;629;874;874;905	A0A1D6P1Z4	0.00413576	11.018	1	S	ARLSSSSSNGVSRVMSIGSNEAALSRGMVLP	X;X;X;X;X;X;X;X;X;X;X;X;X;X;Oxidation (M);Phospho (STY);X;X;X;X;X;X;X;X;X;X;X;X;X;X;X	XXXXXXXXXXXXXPPPPPPPPPPPPPXXXXX	VMS(0.946)IGS(0.054)NEAALSR	3	2	-1.3736			9805	9805	-1.22518	-1.35354	-1.22832	-0.272664	-0.546876	-0.202722	0.00120535	-0.928258	0.525493
A0A1D6P5D3	100381650	A0A1D6P5D3;A0A1D6P5C5;A0A3L6DE31;A0A1D6P5C9;K7VBQ8;A0A1D6P5C4;A0A1D6P5C7;A0A1D6P5D0	259;422;440;468;468;192;422;468	A0A1D6P5D3	0.0076016	26.165	1	S	ERVIANPIVPPEKRYSPPPKTSSSTSATSFS	X;X;X;X;X;X;X;X;X;X;X;X;X;X;X;Phospho (STY);X;X;X;X;X;X;X;X;X;X;X;X;X;X;X	XXXXXXXXXXXXXPPPPPPPXXXXXXXXXXX	RY(0.004)S(0.996)PPPK	3	3	1.6593			7379	7379	-0.710009	-0.696971	-0.659156	0.368726	-0.15484	-0.25507	0.0253697	-0.674984	0.626339
B6TB19	PATL4	B6TB19;A0A3L6DEV7;A0A1D6P5U2	138;138;134	B6TB19	0.000798343	38.191	1	S	KEGQEEGEKEEAEEESGDDTKQEAKEEEADD	X;X;X;X;X;X;X;X;X;X;X;X;X;X;X;Phospho (STY);X;X;X;X;X;X;X;X;X;X;X;X;X;X;X	XPPPPPPPPPPPPPPPPPPPPPPPPXXXXXX	EGQEEGEKEEAEEES(0.997)GDDT(0.003)KQEAK	15	4	0.036761			1770	1770	-1.82403	-2.49277	-2.43004	-1.29143	-1.33622	-1.19423	0.0109337	-0.974986	0.508745
B6TB19	PATL4	B6TB19;A0A3L6DEV7;A0A1D6P5U2	28;28;28	B6TB19	6.45e-66	158.63	1	S	AVAAAPAKEVSTKQASFREESNFLDDLKESE	X;X;X;X;X;X;X;X;X;X;X;X;X;X;X;Phospho (STY);X;X;X;X;X;X;X;X;X;X;X;X;X;X;X	XXXXXXXXXXXXXPPPPPPPPPPPPPPPPPP	QAS(1)FREESNFLDDLKESER	3	4	1.0967			6651;6652;6653	6653	2.47508	2.47777	2.62284	3.22657	3.22338	3.27525	0.000156188	-0.716503	0.608571
A0A1D6P6R6	ZEAMMB73_Zm00001d047074	A0A1D6P6R6;A0A1D6P6R5;A0A1D6P6R3;A0A3L6D9G4	53;242;877;1033	A0A1D6P6R6	0.000295449	40.096	1	S	NSMQTQELPSLSRKNSAGPRNTPLMKNDSEE	X;X;X;X;X;X;X;X;X;Phospho (STY);X;X;X;X;X;Phospho (STY);X;X;X;X;X;X;X;X;X;X;X;X;X;X;X	XXXXXXXXXXXXXPPPPPPPXXXXXXXXXXX	KNS(1)AGPR	3	3	-0.26385			4942	4942	-1.76564	-2.7343	-2.70442	-0.175275	0.291419	0.180511	0.0019832	-2.50034	0.176735
A0A1D6P6R6	ZEAMMB73_Zm00001d047074	A0A1D6P6R6;A0A1D6P6R5;A0A1D6P6R3;A0A3L6D9G4;A0A1D6FHP9	217;406;1041;1197;36	A0A1D6P6R6	1.95e-62	156.42	1	S	TYPATVEDSAIEESKSDLESEPSIKPLLAKG	X;X;X;X;X;X;X;X;X;X;X;X;X;X;X;Phospho (STY);X;X;X;X;X;X;X;X;X;X;X;X;X;X;X	PPPPPPPPPPPPPPPPPPPPPPPPPPPPPPX	STYPATVEDSAIEES(0.155)KS(0.815)DLES(0.03)EPSIKPLLAK	17	5	0.55225			8653	8653	-1.19946	-1.52776	-1.94769	0.0112004	-0.210563	0.094719	0.00291484	-1.52342	0.347859
B6SVY0	At3g05640_0	B6SVY0;A0A3L6DGU3;A0A1D6PAZ1	224;488;487	B6SVY0	1.25e-15	91.047	1	S	DSTDFQSARTSLQSKSFSASEPLQSKIMNTV	X;X;X;X;X;X;X;X;X;X;X;X;X;X;X;Phospho (STY);X;X;X;X;X;X;X;X;X;X;X;X;X;X;X	XXXXXXXXXXXXXXXPPPPPPPPPPPXXXXX	S(1)FSASEPLQSK	1	2	-0.71061			7665	7665	-1.10786	-0.566421	-0.792134	0.0638298	0.000402581	0.0810729	0.00540582	-0.870574	0.546929
A0A1D6PDE8	100382746	A0A1D6PDE8;A0A1D6PDE5;A0A1D6PDE7;A0A1D6PDF2;A0A1D6PDE1;A0A1D6PDE3;A0A1D6PDE2;A0A1D6PDE4;K7VMZ7;A0A3L6DHC6	295;601;89;295;504;601;642;655;687;687	A0A1D6PDE8	8.97e-80	169.18	1	S	QSEDALVSQYFQESSSPKMAKSPSLQRTHGM	X;X;X;X;X;X;X;X;X;X;X;X;X;X;X;Phospho (STY);X;X;X;X;X;X;X;X;X;X;X;X;X;X;X	PPPPPPPPPPPPPPPPPPXXXXXXXXXXXXX	SLQSEDALVSQYFQES(0.001)S(0.051)S(0.949)PK	18	3	1.4531			8019;8020	8019	1.24242	1.18128	1.20815	1.7745	2.09879	1.93419	0.00159888	-0.725209	0.604909
A0A1D6PEH7	ZEAMMB73_Zm00001d047893	A0A1D6PEH7;K7VNE0;B7ZZR2;A0A3L6DHP8;C0P3W9;A0A317Y6G1;A0A1D6JWH4;A0A1D6JWH5;A0A1D6JWH6;Q9SLZ0;A0A1D6JWH7;A0A1D6PEH5;C0P3L1	359;359;359;388;367;367;359;359;371;366;155;66;155	C0P3W9	9.4e-09	78.938	1	S	CNMGKDGDVALFFGLSGTGKTTLSTDHNRLL	X;X;X;X;X;X;X;X;X;X;X;X;X;X;X;Phospho (STY);X;X;X;X;X;X;X;X;X;X;X;X;X;X;X	XXXXXPPPPPPPPPPPPPPPXXXXXXXXXXX	DGDVALFFGLS(0.981)GT(0.019)GK	11	3	1.3465			1342;1343	1342	-1.40142	-1.27733	-1.27764	-0.560733	-0.450354	-0.302188	0.000501169	-0.88104	0.542976
A0A3L6DFU2	At4g35230_5	A0A3L6DFU2;A0A1D6PJI7;B6TZ93;C4J4J0	29;29;29;29	A0A3L6DFU2	3.08e-24	108.53	1	S	PEKKPAAGALPPRRPSYSLSQNQNQAPPAAR	X;X;X;X;X;X;X;X;X;X;X;X;X;X;X;Phospho (STY);X;X;X;X;X;X;X;X;X;X;X;X;X;X;X	XXXXXXXXXXXXXPPPPPPPPPPPPPPPPPP	RPS(0.931)YS(0.069)LSQNQNQAPPAAR	3	3	-0.44844			7197	7197	-1.67388	-1.83979	-1.71883	-1.15897	-0.824342	-1.10986	0.00349424	-0.713112	0.610003
A0A1D6PR32	100382109	A0A1D6PR32;A0A1D6PR36;A0A1D6PR29;A0A1D6PR35;C0P4G3	17;17;17;17;17	A0A1D6PR32	1.1e-12	78.159	1	S	GRRKMSAAAPPSRSWSNVGGSVIPELLAKHK	X;X;X;X;X;X;X;X;X;X;X;X;X;X;X;Phospho (STY);X;X;X;X;X;X;X;X;X;X;X;X;X;X;X	XXXXXXXXXXXXXPPPPPPPPPPPPPPPPXX	S(0.02)WS(0.823)NVGGS(0.157)VIPELLAK	3	2	-0.71607			8743;8744	8744	0.438288	0.554834	0.434349	1.50061	1.54405	1.4147	5.09812e-05	-1.01063	0.496329
A0A1D6PRE0	ZEAMMB73_Zm00001d048979	A0A1D6PRE0;A0A3L6F3V1	173;173	A0A1D6PRE0	4.24e-05	65.81	1	S	PDGRIARIGSEARIVSDDEGGDGGKDDRNLY	X;X;X;X;X;X;X;X;X;X;X;X;X;X;X;Phospho (STY);X;X;X;X;X;X;X;X;X;X;X;X;X;X;X	XXXXXXXXXXXXXPPPPPPPPPPPPPPPXXX	IVS(1)DDEGGDGGKDDR	3	2	0.98223			4453;4454	4454	-0.0337533	-0.0499	-0.168755	1.12591	1.8138	1.28014	0.00218211	-1.49075	0.355827
A0A1D6PS33	ZEAMMB73_Zm00001d049076	A0A1D6PS33;A0A1D6PS32;A0A1D6PS42;A0A1D6PS44;A0A1D6PS45;A0A1D6PS40;A0A1D6PS41;A0A1D6PS36;A0A3L6F6I2	883;883;280;192;192;552;552;655;869	A0A1D6PS33	4.89e-05	41.149	1	S	DDNEPTRKKDHRRVPSTIAIEEVKAAALKGE	X;X;X;X;X;X;X;X;X;X;X;X;X;X;X;Phospho (STY);X;X;X;X;X;X;X;X;X;X;X;X;X;X;X	XXXXXXXXXXXXPPPPPPPPPPPPXXXXXXX	RVPS(0.813)T(0.187)IAIEEVK	4	3	1.0373			7347;7348	7347	-1.03145	-0.987551	-0.818039	-0.332876	-0.145641	-0.293037	0.0013477	-0.688495	0.620501
A0A3L6F510	PCMP-H60_2	A0A3L6F510;A0A1D6PT34	683;705	A0A3L6F510	1.69e-07	55.001	1	S	KAKTIGYEPYQSAELSDSEDDKKPPAGSVRH	X;X;X;X;X;X;X;X;X;X;X;X;X;X;X;Phospho (STY);X;X;X;X;X;X;X;X;X;X;X;X;X;X;X	XXXPPPPPPPPPPPPPPPPPPPPPPPPPPPX	TIGYEPYQS(0.003)AELS(0.871)DS(0.122)EDDKKPPAGS(0.004)VR	13	4	-0.26238			9097	9097	-1.73444	-1.4217	-1.74293	-1.00116	-0.829088	-1.10226	0.00775443	-0.65552	0.634847
A0A1D6PUT4	ZEAMMB73_Zm00001d049449	A0A1D6PUT4;A0A1D6PUT8;A0A1D6PUT7;K7UB09;A0A3L6EYJ2;A0A1D6PUT5	528;448;474;528;528;528	A0A1D6PUT4	0.00221983	23.912	1	S	KDALREKSDVFNSENSEEDKVKLGEPGWRDR	X;X;X;X;X;X;X;X;X;X;X;X;X;X;X;Phospho (STY);X;X;X;X;X;X;X;X;X;X;X;X;X;X;X	XXXXXPPPPPPPPPPPPPPPPPXXXXXXXXX	EKSDVFNS(0.106)ENS(0.894)EEDKVK	11	4	1.9693			1861	1861	-1.77117	-1.91423	-1.88733	-1.11071	-0.86565	-0.803179	0.000848683	-0.931065	0.524471
A0A1D6PZ80	ZEAMMB73_Zm00001d049980	A0A1D6PZ80	191	A0A1D6PZ80	1.44e-87	174.42	1	S	FVKSSVIEGTQPEDDSDKEDVEAKDILKREL	X;X;X;X;X;X;X;X;X;X;X;X;X;X;X;Phospho (STY);X;X;X;X;X;X;X;X;X;X;X;X;X;X;X	XXXPPPPPPPPPPPPPPPPPPPPPPPPPXXX	SSVIEGTQPEDDS(1)DKEDVEAKDILK	13	4	1.3387			8523;8524;8525	8525	1.20928	1.2076	1.10021	1.82054	2.21557	1.81717	0.00473874	-0.778734	0.582878
A0A3L6EYZ1	NIA1_0	A0A3L6EYZ1;A0A1D6PZA5;Q9XGW5;Q43265;P17571	528;528;528;119;239	A0A3L6EYZ1	2.24e-19	107.58	1	S	LETAEAAAPGLKRSTSTPFMNTTDVGKQFTM	X;X;X;X;X;X;X;X;X;X;X;X;X;X;X;Phospho (STY);X;X;X;Oxidation (M);X;X;X;X;X;X;X;X;X;X;X	XXXXXXXXXXXXPPPPPPPPPPPPPPPXXXX	S(0.069)T(0.069)S(0.773)T(0.089)PFMNTTDVGK	3	3	0.96473			8625;8626;8627;8628;8629	8627	2.3942	2.41691	2.37017	3.17484	3.41395	3.3173	0.000212185	-0.908272	0.532823
A0A1D6PZQ6	103653328	A0A1D6PZQ6;A0A1D6PZR0;A0A1D6PZQ7;A0A1D6PZQ2;A0A1D6PZQ0;A0A1D6PZQ8;A0A1D6PZQ5;A0A1D6PZP7;K7UTX1;A0A3L6EYC6;A0A1D6PZP9	564;564;564;1279;1279;1279;1279;1279;1279;1279;1285	A0A1D6PZQ6	2.25e-18	95.999	1	S	RLDNQESRTGVRRVVSDGQFPVATDIPDTLD	X;X;X;X;X;X;X;X;X;X;X;X;X;X;X;Phospho (STY);X;X;X;X;X;X;X;X;X;X;X;X;X;X;X	XXXXXXXXXXXXPPPPPPPPPPPPPPPPPPP	VVS(1)DGQFPVATDIPDTLDAK	3	3	0.60089			7361;10102	10102	0.983624	1.11402	1.14076	1.61625	1.94796	1.81984	0.00270497	-0.715216	0.609114
A0A3L6F2V3	Zm00014a_028260	A0A3L6F2V3;A0A1D6Q181;C0P9J6;A0A1D6KPH7;A0A317YJ61;Q53CF4;G5DDC2;A0A1D6KPH6	136;136;136;137;137;136;137;137	A0A3L6F2V3	0.00606279	25.829	1	S	EYFADQAEALDKRQNSPVSLPMETFKCHLRR	X;X;X;X;X;X;X;X;X;X;X;X;X;X;X;Phospho (STY);X;X;X;X;X;Oxidation (M);X;X;X;X;X;X;X;X;X	XXXXXXXXXXXXXPPPPPPPPPPPPPXXXXX	QNS(0.783)PVS(0.215)LPMET(0.001)FK	3	3	-0.53835			6781	6781	-1.20411	-1.19586	-1.32497	-0.430033	-0.383667	-0.376087	4.73792e-05	-0.845049	0.556692
A0A1D6Q659	606399	A0A1D6Q659;A0A1D6Q646;A0A1D6Q657;A0A1D6Q655;A0A1D6Q658;Q93XG3;A0A1D6Q647;A0A1D6Q643;A0A1D6Q642;K7TYW0;A0A3L6EZN2	183;325;391;559;561;575;689;636;647;689;689	A0A1D6Q659	1.4e-35	115.15	1	S	DIKNIGLDPIADASQSPSRWPLEFEKKQQEI	X;X;X;X;X;X;X;X;X;X;X;X;X;X;X;Phospho (STY);X;X;X;X;X;X;X;X;X;X;X;X;X;X;X	XXXPPPPPPPPPPPPPPPPPPPPPPPXXXXX	NIGLDPIADAS(0.005)QS(0.952)PS(0.043)RWPLEFEK	13	4	0.22057			6379	6379	-0.477979	-0.85153	-0.717264	0.0746992	-0.268839	-0.0509749	0.0154962	-0.600553	0.659501
A0A1D6QA26	100278485	A0A1D6QA26;A0A1D6QA23;A0A1D6QA14;A0A1D6QA20;A0A1D6QA15;A0A1D6QA27;A0A1D6QA16;A0A1D6QA11;A0A1D6QA12;A0A1D6QA29	56;279;360;742;794;1042;1073;1097;1103;1073	A0A1D6QA26	0.00034674	32.029	1;2	S	NSLFMEPSARAPFGHSPVDPRTPSYSKHTDG	X;X;X;X;X;X;X;X;X;X;X;X;X;X;X;Phospho (STY);X;X;X;X;X;Phospho (STY);X;X;X;X;X;X;X;X;X	XXXXXXXXXXPPPPPPPPPPPPPPPPPXXXX	APFGHS(1)PVDPR	6	3	0.077815			674;675	674	-1.55744	-1.73749	-2.19556	-0.920992	-0.379564	-0.799472	0.0107953	-1.13016	0.456866
C0PAU4	ZEAMMB73_Zm00001d052259	C0PAU4;A0A1D6QEM1;B6UA70	69;69;69	C0PAU4	1.28e-31	133.88	1	S	ASASAQTPAPKSIKTSPAAATAAETADDRVA	X;X;X;X;X;X;X;X;X;X;X;X;X;X;X;Phospho (STY);X;X;X;X;X;X;X;X;X;X;X;X;X;X;X	XXXXXXXXXXXPPPPPPPPPPPPPPPPPPXX	S(0.001)IKT(0.099)S(0.899)PAAATAAETADDR	5	3	0.2964			7846	7846	0.282875	0.567516	0.410935	0.968969	1.23914	0.923075	0.00832243	-0.623287	0.64919
A0A1D6QGM1	103654290	A0A1D6QGM1	1044	A0A1D6QGM1	8.16e-05	36.189	1	S	SMPARAESSSLAAAQSGKKVSDSALHRLMGY	X;X;X;X;X;X;X;X;X;X;X;X;X;X;X;Phospho (STY);X;X;X;X;X;X;X;X;X;X;X;X;X;X;X	XXXXXPPPPPPPPPPPPPPXXXXXXXXXXXX	AESSSLAAAQS(1)GKK	11	3	-0.78459			277	277	-1.08386	-0.827012	-1.20389	-0.117516	-0.187454	-0.241147	0.0018418	-0.856212	0.552401
C0PL50	100275578	C0PL50;A0A1D6QKW8;A0A1D6QKW2;A0A1D6QKW3;B6SVW4;A0A1D6QKW9	216;270;315;435;468;497	C0PL50	7.15e-09	55.346	1	S	PVAAAPQDSREKASDSAAEEEDAGDENSLKN	X;X;X;X;X;X;X;X;X;X;X;X;X;X;X;Phospho (STY);X;X;X;X;X;X;X;X;X;X;X;X;X;X;X	XXXXXXXXXXPPPPPPPPPPPPPPPPPPPPP	AS(0.083)DS(0.899)AAEEEDAGDENS(0.015)LKNPT(0.001)ASTVTK	4	3	0.12041			874;1825	874	-0.805153	-1.21442	-1.13625	-0.3363	-0.195297	-0.541052	0.0124257	-0.694392	0.61797
A0A3L6EZS8	Zm00014a_006410	A0A3L6EZS8;A0A1D6QL37	565;565	A0A3L6EZS8	0.000229973	55.629	1	S	RAENEMVRKVMQKVKSTIGLGSEGLVHKARA	X;X;X;X;X;X;X;X;X;X;X;X;X;X;X;Phospho (STY);X;X;X;X;X;X;X;X;X;X;X;X;X;X;X	XXXXXXXXXXXXXPPPPPPPPPPPPPPPXXX	VKS(0.865)T(0.135)IGLGSEGLVHK	3	3	-0.023554			9749;9750	9749	0.0830381	0.0661834	0.0360194	0.644539	0.879836	0.703582	0.000697451	-0.680905	0.623774
A0A3L6F1N2	EMS1_2	A0A3L6F1N2;A0A1D6QMB8	256;289	A0A3L6F1N2	0.0106399	29.164	1	S	EAKLADFGLARIIRGSPAKSHVSTQAAGTVG	X;X;X;X;X;X;X;X;X;X;X;X;X;X;X;Phospho (STY);X;X;X;X;X;X;X;X;X;X;X;X;X;X;X	XXXXXXXXXXXPPPPPPPPXXXXXXXXXXXX	IIRGS(1)PAK	5	3	0.006704			4231	4231	-1.28407	-1.29118	-1.33889	-0.404348	-0.259056	-0.326625	2.77599e-05	-0.974702	0.508845
A0A1D6QNV2	100279221	A0A1D6QNV2;A0A1D6QNV1;A0A1D6QNU9;K7U9T7;A0A1D6QNV3	745;746;680;746;669	A0A1D6QNV2	0.00222575	31.986	1	S	FDSIVGPFPKLSQADSKIKESLVTLENVADG	X;X;X;X;X;X;X;X;X;X;X;X;X;X;X;Phospho (STY);X;X;X;X;X;X;X;X;X;X;X;X;X;X;X	XXXXXXXXXXPPPPPPPPPXXXXXXXXXXXX	LS(0.025)QADS(0.975)KIK	6	3	0.62974			5915	5915	-1.22975	-1.53568	-2.07729	0.310778	-0.327814	0.297571	0.00629551	-1.70775	0.306136
A0A1D6QNV2	100279221	A0A1D6QNV2;A0A1D6QNV1;A0A1D6QNU9;K7U9T7;A0A1D6QNU7;A0A1D6QNV3;A0A3L6EYT9	84;84;19;84;84;84;84	A0A1D6QNV2	2.29e-102	162.25	1	S	TRESTAGISRLSRVSSQFLPPDASRKVQVPL	X;X;X;X;X;X;X;X;X;X;X;X;X;X;X;Phospho (STY);X;X;X;X;X;X;X;X;X;X;X;X;X;X;X	XXXXXXXXXXXXXPPPPPPPPPPPPXXXXXX	VS(0.027)S(0.973)QFLPPDASR	3	2	-0.63598			9963;9964;9965;9966	9964	1.87761	1.96302	1.92918	2.53208	2.84858	2.85625	0.00169083	-0.822369	0.565513
A0A1D6QQ10	ZEAMMB73_Zm00001d004349	A0A1D6QQ10;C0PIS3;K7TNL5;B6TIR8;B6TC92;B6T0L1;B6SZ64;B6SX73;A0A3L6GCA4;A0A3L6EQV7;B6T2K5;A0A3L6FTZ4;A0A1D6ED47;A0A1D6ED46	26;26;26;26;26;26;26;26;26;26;26;26;26;26	A0A1D6QQ10	0.00235512	39.793	1	S	GKSKTDLQAQLKELKSELSLLRVAKVTSDAP	X;X;Phospho (STY);X;X;X;X;X;X;X;X;X;X;X;X;Phospho (STY);X;X;X;X;X;X;X;X;X;X;X;X;X;X;X	XXXXXXXXXXXXPPPPPPPPPPXXXXXXXXX	ELKS(0.999)ELS(0.001)LLR	4	3	-2.6186			1888	1888	-2.45916	-3.12177	-2.70109	0.244289	0.130158	0.207809	0.000113945	-2.95476	0.128982
P31927	SPS	P31927;A0A1Q1CBT2;A0A3L6DIF3;A0A1D6G664;A0A3L6EYB8	136;136;136;90;111	P31927	4.87e-291	272.65	1	S	EQVRREATEDLAEDLSEGEKGDTIGELAPVE	X;X;X;X;X;X;X;X;X;X;X;X;X;X;X;Phospho (STY);X;X;X;X;X;X;X;X;X;X;X;X;X;X;X	XXXXPPPPPPPPPPPPPPPPPPPPPPPPPPP	EATEDLAEDLS(1)EGEKGDTIGELAPVETTKK	11	5	-1.282			1678;1679;1680;1681;1682;1683;6953;6954	1682	3.78003	3.71591	3.48644	4.65829	5.28364	4.72424	0.00484521	-1.22793	0.42693
P31927	SPS	P31927;A0A1Q1CBT2;A0A3L6DIF3	35;35;35	P31927	0.000302874	36.371	1	S	SSRGAGGGGGGGDPRSPTKAASPRGAHMNFN	X;X;X;X;X;X;X;X;X;X;X;X;X;X;X;Phospho (STY);X;X;X;X;X;X;X;X;X;X;X;X;X;X;X	XXXPPPPPPPPPPPPPPPPXXXXXXXXXXXX	GAGGGGGGGDPRS(0.899)PT(0.101)K	13	3	0.14035			2399;2400	2400	-0.403521	-0.374615	-0.593794	0.521889	0.634999	0.668015	0.000199985	-1.06561	0.47777
P31927	SPS	P31927;A0A1Q1CBT2;A0A3L6DIF3;A0A1D6G664;A0A3L6EYB8;A0A3L6D820;A0A3L6GDM8;A0A1D6ISJ0;A0A1D6ISD8;A0A3L6FED5	162;162;162;116;137;443;249;253;306;163	P31927		308.73	1	S	LAPVETTKKKFQRNFSDLTVWSDDNKEKKLY;LVPVEAAKKKFQRNFSDLTVWSDDNKEKKLY	X;X;X;X;X;X;X;X;X;X;X;X;X;X;X;Phospho (STY);X;X;X;X;X;X;X;X;X;X;X;X;X;X;X	XXXXXXXXXXXXXPPPPPPPPPPPPPPPPXX	NFS(1)DLTVWSDDNKEK	3	4	0.07268			6352;6353;6354;6355;6356;6357	6353	4.30639	4.29732	4.055	5.68142	5.94457	5.86136	0.000141959	-1.60955	0.327701
A0A1X7YHF8	100280996	A0A1X7YHF8;A0A1D6LLQ6;A0A1X7YHG4;A0A1D6LLQ3;A0A1X7YHH4;P16025;A0A1X7YHB5;A0A172FJD3;A0A059Q8J7;A0A059Q6M2	1674;212;664;924;515;664;664;664;664;664	A0A1X7YHF8	0.000468696	53.096	1	S	EYRTREEEYRTREEDSEDEYESPENKYRTRE	X;X;X;X;X;X;X;X;X;X;X;X;X;X;X;Phospho (STY);X;X;X;X;X;X;X;X;X;X;X;X;X;X;X	XXXXXXXXXXPPPPPPPPPPPPPPPPXXXXX	T(0.092)REEDS(0.902)EDEY(0.005)ES(0.001)PENK	6	3	0.20731			9282	9282	-2.83283	-3.2278	-3.18372	-1.91241	-1.72563	-1.97612	0.0011516	-1.21006	0.43225
A0A1X7YIH2		A0A1X7YIH2;C0HGW4;B6SWI8;A0A3L6DUD8;A0A1X7YIL7;A0A1D6MAU1;A0A1D6MAT8;B6SY03;B6SWC7;A0A3L6EDL5;A0A1D6MAU4	199;199;199;199;18;157;190;192;192;203;261	A0A1X7YIH2	0.0214613	18.058	1	S	IIGQVSKPAPKRRAKSPIPKRVISDVFKEAK	X;X;X;X;X;X;X;X;X;X;X;X;X;X;X;Phospho (STY);X;X;X;X;X;X;X;X;X;X;X;X;X;X;X	XXXXXXXXXXXXXPPPPPPPXXXXXXXXXXX	AKS(1)PIPK	3	3	-0.15085			499	499	-1.23388	-1.07289	-1.19097	-0.408629	-0.443896	-0.56703	0.00052267	-0.692726	0.618684
A0A1X7YIH2		A0A1X7YIH2;C0HGW4;B6SWI8;A0A3L6DUD8	158;158;158;158	A0A1X7YIH2	0.00144651	36.438	1	S	SFHSDEHSQRLQRVCSSPAPFSTKDGTAPAG	X;X;X;X;X;X;X;X;X;X;X;X;X;X;X;Phospho (STY);X;X;X;X;X;X;X;X;X;X;X;X;X;X;X	XXXXXXXXXXXXXPPPPPPPPPPPXXXXXXX	VCS(0.869)S(0.095)PAPFS(0.029)T(0.007)K	3	2	-0.54159			9484;9485	9484	-0.819114	-1.20417	-0.993568	-0.498156	-0.184544	-0.420851	0.0119597	-0.637768	0.642706
A0A3L6EMD1	EXO70A1_13	A0A3L6EMD1;A0A1X7YII0;B6SVR8;K7W203;A0A3L6DMU6	50;50;50;39;39	A0A3L6EMD1	0.013916	37.977	1	S	LATSKNAADDMIRILSGFDNRLSSITNDHLF	X;X;X;X;X;X;X;X;X;X;X;X;X;X;X;Phospho (STY);X;X;X;X;X;X;X;X;X;X;X;X;X;X;X	XXXXXXXXXXXXXPPPPPPPPXXXXXXXXXX	ILS(1)GFDNR	3	2	0.45241			4259	4259	-1.43668	-0.891145	-0.881879	0.0370031	0.105493	0.132013	0.00332511	-1.1614	0.447077
C0P4E8	100382106	C0P4E8;A0A317YBP4	68;68	C0P4E8	3.17e-08	77.881	1	S	KGRVAGAAADLLHAASQYGKLEGKPVGGYLE	X;X;X;X;X;X;X;X;X;X;X;X;X;X;X;Phospho (STY);X;X;X;X;X;X;X;X;X;X;X;X;X;X;X	XXXPPPPPPPPPPPPPPPPPXXXXXXXXXXX	VAGAAADLLHAAS(1)QYGK	13	3	1.3361			9447	9447	-1.61384	-1.4105	-1.18865	-0.521639	-0.549716	-0.465378	0.00205468	-0.892087	0.538834
C0PDG2	100281182	C0PDG2;B6SSY1;A0A317YCK6	601;601;601	C0PDG2	3.22e-12	90.709	1	S	LLRKEMNETDVPISYSGTGIPEKSIRKAALE	X;X;X;X;X;Oxidation (M);X;X;X;X;X;X;X;X;X;Phospho (STY);X;X;X;X;X;X;X;X;X;X;X;X;X;X;X	XXXPPPPPPPPPPPPPPPPPPPPXXXXXXXX	KEMNETDVPIS(0.065)Y(0.049)S(0.751)GT(0.134)GIPEK	13	3	1.3523			1926;1927;4707	4707	2.1744	2.31846	2.25534	3.00505	3.06145	3.10402	9.01162e-05	-0.807445	0.571393
C0PDG2	100281182	C0PDG2;B6SSY1;A0A317YCK6	201;201;201	C0PDG2	1.81e-67	163.23	1	S	EILVKRLRSKQLRKGSIDGAGNNNFDSFSEA	X;X;X;X;X;X;X;X;X;X;X;X;X;X;X;Phospho (STY);X;X;X;X;X;X;X;X;X;X;X;X;X;X;X	XXXXXXXXXXXXXPPPPPPPPPPPPPPPPPP	KGS(1)IDGAGNNNFDSFSEAGWSR	3	3	-0.17657			4799	4799	0.821442	1.08967	0.953419	2.1227	2.21527	2.05585	0.000199271	-1.17643	0.442444
B6TD54	100282948	B6TD54;A0A3L6D7L4	248;248	B6TD54	2.68e-11	84.995	1	S	IVFPLPFGRVLSPSESFIHELDEKTSASLKF	X;X;X;X;X;X;X;X;X;X;X;X;X;X;X;Phospho (STY);X;X;X;X;X;X;X;X;X;X;X;X;X;X;X	XXXXXXXXXPPPPPPPPPPPPPPPXXXXXXX	VLS(0.001)PS(0.112)ES(0.887)FIHELDEK	7	3	-0.96143			9793	9793	-0.687745	-0.567674	-0.549324	0.112811	0.152406	0.237985	0.00017434	-0.769315	0.586696
A0A3L6DAB4	KIN14L	A0A3L6DAB4	1062	A0A3L6DAB4	1.84e-60	148.2	1	S	QMRTDTALLTKEEGGSPIRNPPTAAEDARLA	X;X;X;X;X;X;X;X;X;X;X;X;X;X;X;Phospho (STY);X;X;X;X;X;X;X;X;X;X;X;X;X;X;X	XXXPPPPPPPPPPPPPPPPPPPPPPPPPPXX	EEGGS(1)PIRNPPTAAEDAR	5	3	0.28832			1708;1709;8946;8949;8950	1709	0.124412	-0.0105789	0.08923	2.04933	3.07394	2.11915	0.00213796	-2.34645	0.196629
B4FG14	100193715	B4FG14;K7VJK4;A0A3L6DCT9	317;834;834	B4FG14	2.5e-05	45.01	1	S	EPDHDLSDVSMSRVFSQLIKAEGR_______	X;X;X;X;X;X;X;X;X;X;X;X;X;X;X;Phospho (STY);X;X;X;X;X;X;X;X;X;X;X;X;X;X;X	XXXXXXXXXXXXXPPPPPPPXXXXXXXXXXX	VFS(1)QLIK	3	2	1.3639			9632	9632	0.210106	0.443093	0.279385	1.63551	1.77183	1.75572	6.50603e-05	-1.41016	0.37627
A0A3L6DCW6	PEP1_1	A0A3L6DCW6;Q84KR7;Q43267;P04711;B8XPZ2;B7ZXA3;B4FA25;B4FUJ8;B4FAP2;C0LFW5;C0LFX9;C0LFY3;C0LFT6;C0LFX7;C0LFX0;C0LFW9;C0LFT9;C0LFU3;C0LFY7;C0LFZ3	708;708;708;708;708;396;173;85;121;22;22;22;22;22;22;22;22;22;22;22	A0A3L6DCW6	5.12e-36	127.83	1	S	RFTAATLEHGMHPPVSPKPEWRKLMDEMAVV	X;X;X;X;X;X;X;X;X;X;Oxidation (M);X;X;X;X;Phospho (STY);X;X;X;X;X;X;X;X;X;X;X;X;X;X;X	XPPPPPPPPPPPPPPPPPPPPPXXXXXXXXX	FTAATLEHGMHPPVS(1)PKPEWR	15	4	-0.54369			2346;2347;2348;2349;2350;2351	2351	1.60904	1.58824	1.41616	2.29939	2.5262	2.48128	0.000629039	-0.897807	0.536702
A0A3L6DCW6	PEP1_1	A0A3L6DCW6;Q84KR7;Q43267;P04711;B8XPZ2;E9NQE1	281;281;281;281;281;281	A0A3L6DCW6	2.83e-10	78.031	1	S	ALKNIGINERLPYNVSLIRFSSWMGGDRDGN	X;X;X;X;X;X;X;X;X;X;X;X;X;X;X;Phospho (STY);X;X;X;X;X;X;X;X;X;X;X;X;X;X;X	XXXXXXXXXXPPPPPPPPPXXXXXXXXXXXX	LPYNVS(1)LIR	6	2	0.58964			5779	5779	-0.121924	-0.210307	-0.255522	0.318981	0.618247	0.586718	0.00237424	-0.7039	0.61391
A0A3L6DCW6	PEP1_1	A0A3L6DCW6;Q84KR7;Q43267;P04711;B8XPZ2;E9NQE1;Q3LR52;A0A1D6J3B2	152;152;152;152;152;152;152;180	A0A3L6DCW6	1.31e-39	136.91	1	S	ATTESDIEETLKRLVSEVGKSPEEVFEALKN	X;X;Phospho (STY);X;Phospho (STY);X;X;X;X;X;X;X;X;X;X;Phospho (STY);X;X;X;X;X;X;X;X;X;X;X;X;X;X;X	XXXXXXXXXXXXXPPPPPPPPPPPPPPPPPX	LVS(1)EVGKSPEEVFEALK	3	3	-1.777			6050	6050	0.737674	0.755627	0.59735	1.26132	1.44	1.38437	0.000794246	-0.665015	0.630682
A0A3L6DCW6	PEP1_1	A0A3L6DCW6;Q84KR7;Q43267;P04711;B8XPZ2;E9NQE1;Q3LR52;A0A1D6J3B2;Q41197	29;29;29;29;29;29;29;29;29	A0A3L6DCW6	8.31e-36	130.78	1	S	HSIDAQLRQLVPGKVSEDDKLIEYDALLVDR	X;Phospho (STY);X;X;X;X;X;X;X;X;X;X;X;X;X;Phospho (STY);X;X;X;X;X;X;X;X;X;X;X;X;X;X;X	XXXXXXXXPPPPPPPPPPPPPPPPPPPPPPP	QLVPGKVS(1)EDDKLIEYDALLVDR	8	4	1.4443			6759	6759	-0.797072	-0.570385	-0.99492	-0.0711384	0.182979	0.14545	0.00392737	-0.873222	0.545926
C0P489	100382088	C0P489;A0A3L6DF15	26;26	C0P489	2.67e-13	62.444	1	S	GAVKDQTSISLAKVTSNIAPDLDVLIVKATS	X;X;X;X;X;X;X;X;X;X;X;X;X;X;X;Phospho (STY);X;X;X;X;X;X;X;X;X;X;X;X;X;X;X	XXXXXXXXXXXXXPPPPPPPPPPPPPPPXXX	VT(0.232)S(0.768)NIAPDLDVLIVK	3	3	0.92555			10044;10045	10044	-2.31214	-2.05464	-1.93155	-0.488941	-0.18991	-0.276108	0.000239403	-1.78112	0.290957
A0A3L6DLB4	Zm00014a_003996	A0A3L6DLB4	31	A0A3L6DLB4	3.4e-11	83.031	1	S	EVQAPLSATMAKEAQSPPSATIAEATAPPQL	X;X;X;X;X;X;X;X;X;X;X;X;X;X;X;Phospho (STY);X;X;X;X;X;X;X;X;X;X;X;X;X;X;X	XXXXXXXXXXXXPPPPPPPPPPPPPPPPPPP	EAQS(0.972)PPS(0.027)ATIAEATAPPQLVLFNSFTK	4	4	-0.1119			1659	1659	-2.23223	-2.20421	-2.28312	-1.43683	-1.17957	-1.28851	0.000274541	-0.938212	0.521879
B4F8M4	100191387	B4F8M4;A0A3L6DMJ4;K7V386	462;462;463	B4F8M4	5.11e-17	82.345	1	S	RRQLQNPTRATRSLSSLTRAVRRGGESTGID	X;X;X;X;X;X;X;X;X;X;X;X;X;X;X;Phospho (STY);X;X;X;X;X;X;X;X;X;X;X;X;X;X;X	XXXXXXXXXXXXPPPPPPPXXXXXXXXXXXX	SLS(0.145)S(0.854)LT(0.001)R	4	2	-0.21028			8061;8062	8062	0.356062	0.645143	0.508916	1.56317	1.64769	1.61453	0.000221669	-1.10509	0.464872
A0A3L6DQ09	Zm00014a_011088	A0A3L6DQ09;B4FHA8;A0A3L6DMK1;Q9M4U5	94;105;105;105	A0A3L6DQ09	2.74e-15	97.003	1	S	YKVEQPIEGDEMDLDSEDEEEELNIPVIKEN	X;X;X;X;X;X;X;X;X;X;X;Oxidation (M);X;X;X;Phospho (STY);X;X;X;X;X;X;X;X;X;X;X;X;X;X;X	XXPPPPPPPPPPPPPPPPPPPPPPPPPPPXX	VEQPIEGDEMDLDS(1)EDEEEELNIPVIK	14	4	-0.79736			9588;9589;9590;9591;9592	9592	2.51016	2.18508	2.22038	3.37006	2.71806	3.13641	0.0237796	-0.769635	0.586566
C0P626	Zm00014a_041206	C0P626;A0A3L6DN59	10;10	C0P626	1.07e-06	43.697	1	S	______MGDAVEHLKSGFQKFKTEVYDKKPE	X;X;X;X;X;X;X;X;X;X;X;X;X;X;X;Phospho (STY);X;X;X;X;X;X;X;X;X;X;X;X;X;X;X	XXXXXXXPPPPPPPPPPPPPXXXXXXXXXXX	GDAVEHLKS(1)GFQK	9	3	0.29882			2460	2460	-0.553131	-0.651668	-0.638622	-0.0853808	0.205193	-0.0440052	0.00262095	-0.639743	0.641827
B6SP02	100281996	B6SP02;A0A3L6DQL8;A0A1D6MRS7;B6T0U5;B6UC87;B6SPH4;B6SKT2;A0A3L6FCL4;A0A3L6E6V0;B6U0G5;B6TL28	13;13;13;13;13;13;13;13;13;13;13	B6SP02	0.000179512	62.552	1	S	___MAKSKNHTAHNQSFKAHKNGIKKPKRHR	X;X;X;X;X;X;X;X;X;X;X;X;X;X;X;Phospho (STY);X;X;X;X;X;X;X;X;X;X;X;X;X;X;X	XXXXXXXXPPPPPPPPPPXXXXXXXXXXXXX	NHTAHNQS(1)FK	8	3	0.19112			6376	6376	-2.55661	-3.36564	-2.91046	-0.8597	-1.16002	-1.02758	0.00151473	-1.92847	0.262708
A0A3L6DS82	Zm00014a_020766	A0A3L6DS82;B4G1V7	8;8	B4G1V7	1.74e-216	232.27	1	S	________MAEGKSSSGGDLFSSGKLVAGAA	X;X;X;X;X;X;X;X;X;X;X;X;X;X;X;Phospho (STY);X;X;X;X;X;X;X;X;X;X;X;X;X;X;X	XXXXXXXXXXXXXPPPPPPPPPPPPXXXXXX	S(0.049)S(0.049)S(0.901)GGDLFSSGK	3	2	0.42452			8438;8439;8441	8439	1.19192	0.894231	1.09413	2.93046	2.79174	2.918	4.98296e-05	-1.81997	0.283227
A0A3L6DS82	Zm00014a_020766	A0A3L6DS82;B4G1V7	14;14	B4G1V7	9.52e-06	73.714	1	S	__MAEGKSSSGGDLFSSGKLVAGAAVSVFQQ	X;X;X;X;X;X;X;X;X;X;X;X;X;X;X;Phospho (STY);X;X;X;X;X;X;X;X;X;X;X;X;X;X;X	XXXXXXXPPPPPPPPPPPPXXXXXXXXXXXX	SSSGGDLFS(0.967)S(0.033)GK	9	2	-1.3583			8436;8437	8437	0.489378	0.120978	0.0954041	1.23897	1.01184	1.37182	0.00415321	-0.97229	0.509697
A0A3L6DXJ5	PMI1_2	A0A3L6DXJ5	99	A0A3L6DXJ5	1.07e-73	158.05	1	S	DEDDDAGVALPSKSQSFAAVTTSPTVVGEKK	X;X;X;X;X;X;X;X;X;X;X;X;X;X;X;Phospho (STY);X;X;X;X;X;X;X;X;X;X;X;X;X;X;X	XXXXXXXXXXXXXPPPPPPPPPPPPPPPPPX	S(0.196)QS(0.792)FAAVT(0.012)TSPTVVGEK	3	3	-0.024262			8269;8270;8271	8270	1.27974	1.49347	1.44996	2.20472	2.20831	2.19317	0.000263243	-0.794344	0.576605
C0PDP9	100383160	C0PDP9;A0A3L6DYE8	505;506	C0PDP9	0.00134285	81.438	1	S	LTADAPKSTKITFGDSDED____________	X;X;X;X;X;X;X;X;X;X;X;X;X;X;X;Phospho (STY);X;X;X;X;X;X;X;X;X;X;X;X;X;X;X	XXXXXXXXXXPPPPPPPPPXXXXXXXXXXXX	ITFGDS(1)DED	6	2	-0.05506			4405;4406	4406	0.0272713	0.134851	0.195298	0.793273	0.702441	0.730565	0.000371386	-0.622953	0.649341
B6THA0	100191706	B6THA0;B4F9V3;A0A3L6DYI0	113;113;113	B6THA0	2.17e-47	142.51	1	S	DRDRVLPVRSGGGAWSDDDDDDKELQGLSYF	X;X;X;X;X;X;X;X;X;X;X;X;X;X;X;Phospho (STY);X;X;X;X;X;X;X;X;X;X;X;X;X;X;X	XXXXXXXXXPPPPPPPPPPPPPPPPPPPPPP	SGGGAWS(1)DDDDDDKELQGLSYFEYR	7	3	2.2615			7713	7713	0.824719	0.67546	0.66939	1.61709	1.46544	1.30403	0.00204865	-0.738997	0.599156
Q9FYS0	rps6-2	Q9FYS0;O04014;A0A3L6G2K1;A0A3L6DZ21;C4J6J5;B6T4E7;A0A1D6IJZ5;A0A3L6DTM6;A0A1D6IJZ3;A0A1D6G511;A0A3L6FHU7;A0A1D6NJK6;B6T1H0;A0A3L6DZY1;A0A1D6IK00;A0A1D6IJZ9	229;229;229;229;229;229;177;96;96;96;96;96;229;229;177;96	Q9FYS0	0.000920918	55.304	1;2	S	QKLLAQRLKEQRDRRSESLAKRRSKLSAAAK;QKLLAQRLKEQRDRRSESLAKRRSKLSAAVK	X;X;X;X;X;X;X;X;X;X;X;X;X;X;X;Phospho (STY);X;Phospho (STY);X;X;X;X;X;Phospho (STY);X;X;Phospho (STY);X;X;X;X	XXXXXXXXXXXXPPPPPPPPPXXXXXXXXXX	DRRS(1)ES(1)LAK	4	3	0.10364			1551;1552;1553;1554	1554	1.29857	1.59323	1.34287	1.96348	2.15656	2.04623	0.00389949	-0.643864	0.639996
B6T4H7	RPL27AC_0	B6T4H7;A0A3L6DZ34	80;80	B6T4H7	0.01284	18.361	1	S	RNKFYCPAVNIERLWSMVPADKAAEAGLDKA	X;X;X;X;X;X;X;X;X;X;X;X;X;X;X;Phospho (STY);Oxidation (M);X;X;X;X;X;X;X;X;X;X;X;X;X;X	XXXXXXXXXXXXXPPPPPPPPPXXXXXXXXX	LWS(1)MVPADK	3	2	-1.1927			6080	6080	0.177257	0.03726	0.174374	0.751712	0.725815	0.751923	0.000198787	-0.613519	0.6536
C0PFE4	CNOT10_0	C0PFE4;A0A3L6E3G8	512;720	C0PFE4	1.44e-94	173.11	1	S	PYNMENSEKALVEKDSDSEDLAAATVTKVAT	X;X;X;X;X;X;X;X;X;X;X;X;X;X;X;Phospho (STY);X;X;X;X;X;X;X;X;X;X;X;X;X;X;X	XXXXXXXXXPPPPPPPPPPPPPPPPPPPXXX	ALVEKDS(0.993)DS(0.007)EDLAAATVTK	7	4	0.186			603	603	-0.580464	-0.784544	-0.643754	0.360869	0.504381	0.453733	0.000112398	-1.10925	0.463535
A0A3L6E8A2	Zm00014a_031052	A0A3L6E8A2;B4FCV5;C0PKY9;C0PG79	535;300;534;534	A0A3L6E8A2	3.54e-06	62.578	1	S	GGGGGFSRQLGGLPVSGEHLRGAGWPLAARE	X;X;X;X;X;X;X;X;X;X;X;X;X;X;X;Phospho (STY);X;X;X;X;X;X;X;X;X;X;X;X;X;X;X	XXXXXXXXPPPPPPPPPPPPPXXXXXXXXXX	QLGGLPVS(1)GEHLR	8	2	-0.90362			6737;6738	6738	-0.175431	-0.0754857	0.0817797	0.503035	0.547914	0.594951	0.00159453	-0.605012	0.657466
A0A3L6E8Y1	At5g49770_0	A0A3L6E8Y1	614	A0A3L6E8Y1	1.49e-06	81.576	1	S	KEVTGRTDPFASWGVSQKDSGGAPQLKGARL	X;X;X;X;X;X;X;X;X;X;X;X;X;X;X;Phospho (STY);X;X;X;X;X;X;X;X;X;X;X;X;X;X;X	XXXXXXPPPPPPPPPPPPXXXXXXXXXXXXX	TDPFASWGVS(1)QK	10	3	-0.10917			8931	8931	-1.78218	-1.54454	-1.364	-0.295108	-0.743446	-0.207431	0.00503022	-1.14824	0.451174
B4G1E6	100191540	B4G1E6;B4F957;A0A3L6E8Z0	273;321;321	B4G1E6	9.86e-05	57.034	1	S	GGYRKPKPYDEETQGSYGYGEEQPKYQSGGY	X;X;X;X;X;X;X;X;X;X;X;X;X;X;X;Phospho (STY);X;X;X;X;X;X;X;X;X;X;X;Phospho (STY);X;X;X	XXXXPPPPPPPPPPPPPPPPPPPPPXXXXXX	KPKPYDEET(0.006)QGS(0.913)Y(0.04)GY(0.04)GEEQPK	12	4	-0.17909			4999	4999	-2.54992	-2.61218	-2.0925	-0.942473	-1.11551	-1.13815	0.00151136	-1.35282	0.391526
B4G1E6	100191540	B4G1E6;B4F957;A0A3L6E8Z0	164;212;212	B4G1E6	8.29e-08	82.418	1	S	GSGFGRKPQIEESYGSGYGRTPQVEESYGSG	X;Phospho (STY);X;X;X;X;X;X;X;X;X;X;X;X;X;Phospho (STY);X;X;X;X;X;X;X;X;X;X;X;X;X;Phospho (STY);X	XXXXXXPPPPPPPPPPPPPPXXXXXXXXXXX	KPQIEES(0.002)YGS(0.998)GYGR	10	3	-0.15087			5010	5010	-1.13285	-1.34733	-1.66641	0.484421	0.375322	0.319528	0.000397667	-1.77529	0.292137
B4G1E6	100191540	B4G1E6;B4F957;A0A3L6E8Z0	192;240;240	B4G1E6	3.57e-17	105.25	1	S	GSGYGRKPQVEESYGSGYGSRPQGGEEYGSG	X;Phospho (STY);X;X;X;X;X;X;X;X;X;X;X;X;X;Phospho (STY);X;X;X;X;X;X;X;X;X;X;X;X;X;X;X	XXXXXXPPPPPPPPPPPPPPPPPPPPPPPPP	KPQVEES(0.011)YGS(0.989)GYGSRPQGGEEYGSGGGGYGR	10	4	-0.55449			5016	5016	-2.98864	-3.1233	-3.08593	-0.433387	-0.516405	-0.583054	1.70381e-06	-2.55501	0.170163
B6U9Q0	Zm00014a_013702	B6U9Q0;A0A3L6EA62;C0PDL6;B4FW95	467;626;629;629	B6U9Q0	0.000107019	54.573	1	S	LAWRRYKHRKTLSSLSFIRPRRPLSRCSSLG	X;X;X;X;X;X;X;X;X;X;X;X;X;X;X;Phospho (STY);X;X;X;X;X;X;X;X;X;X;X;X;X;X;X	XXXXXXXXXXPPPPPPPPPPPXXXXXXXXXX	TLSS(0.003)LS(0.997)FIRPR	6	3	-0.90103			9187	9187	-2.62571	-2.39763	-2.36763	-1.37384	-1.41664	-1.17971	0.000477591	-1.14026	0.453677
A0A3L6EDS2	PPDK1_1	A0A3L6EDS2;B7ZYP6;E9NQE5;B8YDC0;A0A1D6M411;A0A1D6M434;A0A1D6M426;C5IHC6;C5IHC7;C5IHF1;A0A1D6M418;A0A1D6M414;A0A1D6M431;A0A1D6M422;A0A1D6M439;A0A1D6M433;C5IHD1;A0A1D6M417;C5IHC9;A0A1D6M413;C5IHD3;A0A1D6M432;A0A1D6M436;C5IHD5;A0A1D6M427;A0A1D6M430;A0A1D6M424;C5IHC4;C5IHE1;P11155;D3K3U9;A0A1D6M420;C5IHD6;C5IHD0;A0A1D6M429;C5IHE4;A0A1D6M415;C5IHC5;C5IHE5;C5IHE8;C5IHF0;C5IHE6;C5IHE9;C5IHE2;C5IHE7;C5IH…	288;288;288;235;251;171;148;198;198;198;185;199;180;113;79;45;198;62;198;85;198;106;127;198;169;199;51;198;198;264;288;31;198;198;199;198;131;198;198;198;198;198;198;198;198;198	A0A3L6EDS2	4.61e-05	32.263	1	S	SDLKELVGQYKEVYLSAKGEPFPSDPKKQLE	Phospho (STY);X;X;X;X;X;X;X;X;X;X;X;X;X;X;Phospho (STY);X;X;X;X;X;X;X;X;X;X;X;X;X;X;X	XXXXXXXXXXXPPPPPPPPPPPPPPPPPXXX	EVYLS(1)AK	5	2	0.85343			2060;2061;2062;2063	2060	2.49496	2.5509	2.23696	3.04442	3.24872	3.06896	0.00396323	-0.693093	0.618526
A0A3L6EDS2	PPDK1_1	A0A3L6EDS2;B7ZYP6;E9NQE5;B8YDC0;A0A1D6M411;A0A1D6M434;A0A1D6M426;C5IHC6;C5IHC7;C5IHF1;A0A1D6M418;A0A1D6M414;A0A1D6M431;A0A1D6M422;A0A1D6M439;A0A1D6M433;C5IHD1;A0A1D6M417;C5IHC9;A0A1D6M413;C5IHD3;A0A1D6M432;A0A1D6M436;C5IHD5;A0A1D6M427;A0A1D6M430;A0A1D6M424;C5IHC4;C5IHE1;P11155;D3K3U9;A0A1D6M420;C5IHD6;C5IHD9;C5IHD4;A0A1D6M429;C5IHE4;A0A1D6M415;C5IHC5;C5IHE5;C5IHE8;A0A1D6M444;A0A1D6M425;C5IHF0;C5I…	552;552;552;499;515;435;412;462;462;462;449;463;444;377;343;309;462;326;462;349;462;370;391;462;433;463;315;462;462;528;552;295;462;462;462;463;462;395;462;462;462;213;221;462;462;462;275;136;462;462;16;464;464;509;464;509;392;444;371;443;315;441;309;350;354;295;436;396;408;433;435;222;213;30;16;115;464	A0A3L6EDS2	1.14e-54	140.63	1	S	MHAAVGILTERGGMTSHAAVVARGWGKCCVS	Oxidation (M);X;X;X;X;X;X;X;X;X;X;X;X;Oxidation (M);X;Phospho (STY);X;X;X;X;X;X;X;X;X;X;X;X;X;X;X	XXXXXXXXXXXPPPPPPPPPPPPXXXXXXXX	GGMT(0.059)S(0.941)HAAVVAR	5	3	0.044967			2607;2647;2648;2649;2666;2667;2668;2669;2670;2671;2672;2673;2674;2675;2676;2677;2678;2679;2680;2701;2702;2703;2704;2705;2706;2707;2708;2709;2710;2711;2712;2713;2714;2715;2729;2736;2738;2742;2744;2745;2749;2750;2764;2769;2770;2771;2777;2778;2779;2780;2781;2782;2783;2787;2788;2789;2793;2794;2797;2798;2800;2803;2805;2807;2811;2816;2817;2821;2822;2824;2825;2827;2830;2833;2835;2837;2838;2839;2842;2843…	3260	6.20642	6.26581	6.21269	6.98692	7.17536	7.25279	0.000360319	-0.910051	0.532166
A0A3L6EDS2	PPDK1_1	A0A3L6EDS2;B7ZYP6;E9NQE5;B8YDC0;A0A1D6M411;A0A1D6M434;A0A1D6M426;C5IHC6;C5IHC7;C5IHF1;A0A1D6M418;A0A1D6M414;A0A1D6M431;A0A1D6M422;A0A1D6M439;A0A1D6M433;C5IHD1;A0A1D6M417;C5IHC9;A0A1D6M413;C5IHD3;A0A1D6M432;A0A1D6M436;C5IHD5;A0A1D6M427;A0A1D6M430;A0A1D6M424;C5IHC4;C5IHE1;P11155;D3K3U9;A0A1D6M420;C5IHD6;C5IHD9;C5IHD0;C5IHD4;A0A1D6M429;C5IHC5	273;273;273;220;236;156;133;183;183;183;170;184;165;98;64;30;183;47;183;70;183;91;112;183;154;184;36;183;183;249;273;16;183;183;183;183;184;183	A0A3L6EDS2	4.84e-39	127.33	1	S	MKESKGLKNDTDLTASDLKELVGQYKEVYLS	Oxidation (M);X;X;X;X;X;X;X;X;X;X;X;X;X;X;Phospho (STY);X;X;X;X;X;X;X;X;X;X;X;X;X;X;Phospho (STY)	XXXXXPPPPPPPPPPPPPPPPPPPPPXXXXX	NDTDLT(0.005)AS(0.995)DLKELVGQYK	8	4	-1.1999			3451;3452;6313;6314;6315;6316	6316	1.68427	1.68433	1.40736	2.25864	2.9443	2.28436	0.0203887	-0.903783	0.534484
Q947C1	541911	Q947C1;B4F8N3;A0A3L6EEX8	299;331;331	Q947C1	2.23e-146	179.51	1	S	FVDRGVGSSMLPKSASACSLASGFSFGSAKT	X;X;X;X;X;X;X;X;X;X;X;X;X;X;X;Phospho (STY);X;X;X;X;X;X;X;X;X;X;X;X;X;X;X	XXXXXXXXXXXXXPPPPPPPPPPPPPPPPPX	S(0.166)AS(0.833)ACS(0.001)LASGFSFGSAK	3	3	-1.348			7474;7475	7474	1.87986	1.78044	1.66743	2.26614	2.54003	2.38131	0.00348773	-0.619917	0.650708
A0A3L6EIV0	CLPB1	A0A3L6EIV0;A0A1D6MAS0;B4F920;A0A1D6MAR8;C0PHU7;A0A1D6MAR7;A0A1D6MAS1	1567;60;254;429;678;614;678	A0A3L6EIV0	1.94e-26	111.25	1	S	KMTDGGALDLIDDEDSDVEEGIDRHTRGNLG	X;Oxidation (M);X;X;X;X;X;X;X;X;X;X;X;X;X;Phospho (STY);X;X;X;X;X;X;X;X;X;X;X;X;X;X;X	PPPPPPPPPPPPPPPPPPPPPPPPXXXXXXX	KMTDGGALDLIDDEDS(1)DVEEGIDR	16	3	0.073818			4934;4935	4935	1.2501	1.20916	1.11421	1.89112	2.22457	2.03117	0.00120957	-0.857798	0.551794
B6TDT5	100276543	B6TDT5;A0A3L6ENE9	433;433	B6TDT5	7.3e-130	188.31	1	S	RGAGKFRRFDYIDQKSDDDDDNAWFQKRGAS	X;X;X;X;X;X;X;X;X;X;X;X;X;X;X;Phospho (STY);X;X;X;X;X;X;X;X;X;X;X;X;X;X;X	XXXXXXXPPPPPPPPPPPPPPPPPPPPXXXX	FDYIDQKS(1)DDDDDNAWFQK	8	3	1.5639			2135;6963	2135	2.32454	2.31689	2.28586	3.02675	2.91339	3.04204	8.48132e-05	-0.684962	0.622022
K7UZL9	ZEAMMB73_Zm00001d051838	K7UZL9;B6UDM7;A0A3L6F2M4	392;392;392	K7UZL9	0.0163224	31.507	1	S	GSRSEEWDRGSRARLSPPKSSDLRGRLHERL	X;X;X;X;X;X;X;X;X;X;X;X;X;X;X;Phospho (STY);X;X;X;X;X;X;X;X;X;X;X;X;X;X;X	XXXXXXXXXXXXPPPPPPPXXXXXXXXXXXX	ARLS(1)PPK	4	3	0.15983			832;833;834	833	1.19803	1.03815	0.964485	1.92915	1.41482	1.74097	0.0191094	-0.628092	0.647032
B4FGZ1	100193976	B4FGZ1;A0A3L6F4I0	258;258	B4FGZ1	2.02e-06	57.783	1	S	TNGDHNGDAKLASAPSKNTGSGKTRKRR___	X;X;X;X;X;X;X;X;X;X;X;X;X;X;X;Phospho (STY);X;X;X;X;X;X;X;X;X;X;X;X;X;X;X	XXXXXXXXXXPPPPPPPPPPPPPXXXXXXXX	LAS(0.011)APS(0.964)KNT(0.025)GSGK	6	3	1.427			5270	5270	0.493431	0.392359	0.171334	1.0944	1.09724	1.22877	0.0016844	-0.787763	0.579242
B7ZYV4	100193626	B7ZYV4;B6TVG5;B4FFQ7;A0A3L6FCC2	552;552;552;552	B7ZYV4	0.0358395	43.048	1	S	GKHNLFSGPTLVRVNSSTTKDGGFEIERVDL	X;X;X;X;X;X;X;X;X;X;X;X;X;X;X;Phospho (STY);X;X;X;X;X;X;X;X;X;X;X;X;X;X;X	XXXXXXXXXXXXXPPPPPPPXXXXXXXXXXX	VNS(0.971)S(0.023)T(0.004)T(0.003)K	3	2	-0.053942			9816	9816	-1.55017	-1.21765	-1.26805	-0.550818	-0.650247	-0.782492	0.00516591	-0.684103	0.622393
C4J039	100283599	C4J039;B6TJU2;A0A3L6FIZ0	7;7;7	C4J039	0.0413929	13.158	1	S	_________MKLSIQSLARKLSLPSPKRGGG	X;X;X;X;X;X;X;X;X;X;X;X;X;X;X;Phospho (STY);X;X;X;X;X;Phospho (STY);X;X;Phospho (STY);X;X;X;X;X;X	XXXXXXXXXXXPPPPPPPPXXXXXXXXXXXX	LS(0.011)IQS(0.989)LAR	5	2	0.31717			5889	5889	-1.18719	-1.18282	-1.21873	-0.622315	-0.541971	-0.623595	3.33955e-05	-0.600286	0.659623
A0A3L6FPB5	TSS_1	A0A3L6FPB5	549	A0A3L6FPB5	2.59e-09	86.342	1	S	LPRVIHPETVGNQHHSPKSHASNPAKKLARK	X;X;X;X;X;X;X;X;X;X;X;X;X;X;X;Phospho (STY);X;X;X;X;X;X;X;X;X;X;X;X;X;X;X	XXXPPPPPPPPPPPPPPPXXXXXXXXXXXXX	VIHPET(0.007)VGNQHHS(0.993)PK	13	4	0.034839			9709	9709	-2.12171	-2.40664	-2.24294	-1.09201	-0.809737	-1.05113	0.00045766	-1.27281	0.413854
A0A3L6FTE0	At3g47570_6	A0A3L6FTE0	809	A0A3L6FTE0	0.000425305	31.383	1	S	AKFYLDSRTTLTADYSKPINSTGVKGTIGYI	X;X;X;X;X;X;X;X;X;X;X;X;X;X;X;Phospho (STY);X;X;X;X;X;X;X;X;X;X;X;X;X;X;X	XXXXXXXXPPPPPPPPPPPPPPPPPXXXXXX	T(0.025)T(0.025)LT(0.153)ADY(0.005)S(0.788)KPINS(0.002)T(0.002)GVK	8	3	0.13078			9352	9352	-0.393564	-0.197213	-0.211683	0.420576	0.557602	0.287466	0.00235315	-0.689368	0.620125
B6TAI2	At1g77360_0	B6TAI2;A0A3L6FXK0	8;8	B6TAI2	0.001578	45.827	1	S	________MITAEEKSPEREEEEEANPRAEA	X;X;X;X;X;X;X;X;Oxidation (M);X;X;X;X;X;X;Phospho (STY);X;X;X;X;X;X;X;X;X;X;X;X;X;X;X	XXXXXXXXPPPPPPPPPPPPPPPPPPPPXXX	MIT(0.02)AEEKS(0.98)PEREEEEEANPR	8	3	-0.37864			6169	6169	-2.53915	-2.37426	-2.05526	-0.978626	-0.743406	-0.507608	0.00130266	-1.57968	0.334556
C0PE81	100383212	C0PE81;A0A3L6FZG9	718;718	C0PE81	3.54e-111	177.27	1	S	PYSVENSEKALVEKDSDGEDLVAPAVTKLAT	X;X;X;X;X;X;X;X;X;X;X;X;X;X;X;Phospho (STY);X;X;X;X;X;X;X;X;X;X;X;X;X;X;X	XXXXXXXXXPPPPPPPPPPPPPPPPPPPXXX	ALVEKDS(1)DGEDLVAPAVTK	7	3	-0.38766			599;600;601	601	2.11797	1.89914	1.82051	2.88731	3.17702	2.95908	0.00103767	-1.06193	0.478991
C4J193	100501122	C4J193;A0A3L6FZI1	734;734	C4J193	7.38e-12	87.346	1	S	LLKVITEHKEDAVAQSPK_____________	X;X;X;X;X;X;X;X;X;X;X;X;X;X;X;Phospho (STY);X;X;X;X;X;X;X;X;X;X;X;X;X;X;X	XXXPPPPPPPPPPPPPPPXXXXXXXXXXXXX	VITEHKEDAVAQS(1)PK	13	4	0.61313			9726;9727	9727	-0.401594	-0.0995381	-0.140394	0.76432	1.09091	0.944837	0.00101316	-1.1472	0.451501
K7TQJ7	100382039	K7TQJ7;A0A3L6G5A5;A0A1D6J9H0;C0P3U7;A0A1D6J9H3	558;558;72;329;329	K7TQJ7	3.11e-11	98.831	1	S	VHKTSSINTRLLPQGSGAGLIGKSALLGTGA	X;X;X;X;X;X;X;X;X;X;X;X;X;X;X;Phospho (STY);X;X;X;X;X;X;X;X;X;X;X;X;X;X;X	XXXXXXXXXXPPPPPPPPPPPPPXXXXXXXX	LLPQGS(1)GAGLIGK	6	2	0.9657			5630;5631	5631	-0.834156	-0.73268	-0.784809	-0.0116395	-0.106254	-0.00198349	7.38734e-05	-0.743923	0.597114
K7UH50	ZEAMMB73_Zm00001d024966	K7UH50;B6TMN2;B4FZ69;A0A3L6G606	87;87;87;87	K7UH50	7.35e-93	169.41	1	S	PPPKAAVEETKPPVPSGDEKGEPTVEELAGL	X;X;X;X;X;X;X;X;X;X;X;X;X;X;X;Phospho (STY);X;X;X;X;X;X;X;X;X;X;X;X;X;X;X	XXXXPPPPPPPPPPPPPPPPPPPPPPPPPPP	AAVEET(0.001)KPPVPS(0.999)GDEKGEPTVEELAGLLDVR	12	5	1.8984			173;174	174	0.352979	0.534397	0.319361	1.19658	1.29629	1.24895	0.00031357	-0.845026	0.556701
C0PMD9	Zm00014a_044625	C0PMD9;A0A3L6G6H6;K7TKL2	348;688;688	C0PMD9	1.39e-06	60.51	1	S	LKGKGFMKEKMKTSGSFVLERFGAFDFAKPG	X;X;X;X;X;X;X;X;X;X;X;X;X;X;X;Phospho (STY);X;X;X;X;X;X;X;X;X;X;X;X;X;X;X	XXXXXXXXXXXXPPPPPPPPPXXXXXXXXXX	T(0.161)S(0.014)GS(0.825)FVLER	4	2	0.23437			9302	9302	0.0948745	0.00882137	-0.040043	0.830635	0.745161	0.640166	0.000449874	-0.717436	0.608177
B4FDN9	100193069	B4FDN9;A0A3L6G7Q8;B6TH59;B4FVD6;A0A3L6FY28	67;67;67;67;67	B4FDN9	1.67e-31	106.22	1	S	IVAAKESMGETMRASSFSLAEAKYVAGDGVR	X;X;X;X;X;X;X;X;X;X;X;X;X;X;X;Phospho (STY);X;X;X;X;X;X;X;X;X;X;X;X;X;X;X	XXXXXXXXXXXXXPPPPPPPPPPXXXXXXXX	AS(0.002)S(0.992)FS(0.006)LAEAK	3	2	1.048			945	945	0.29278	0.128334	0.229355	0.759331	1.084	0.735394	0.00625483	-0.642753	0.64049
K0D9T4		K0D9T4;B6TCE1;B6SY08;B4FAF4	276;276;276;276	K0D9T4	0.0182248	18.169	1	S	GRHDRYDDGGRRRHGSPSRRARSPVRESSEE	X;X;X;X;X;X;X;X;X;X;X;X;X;X;X;Phospho (STY);X;X;X;X;X;X;X;X;X;X;X;X;X;X;X	XXXXXXXXXXXXXPPPPPPPXXXXXXXXXXX	HGS(0.781)PS(0.219)RR	3	3	-0.079384			3835	3835	-0.645051	-0.637334	-1.04711	-0.117547	0.195877	-0.287893	0.0226202	-0.706643	0.612744
B4FBY6	ZEAMMB73_Zm00001d022546	B4FBY6;B4FBW7;A0A1D6INZ6;A0A3L6FQC9;A0A3L6E419;A0A3L6FCG5;A0A1D6K120;B6SLW1;Q7DLR7;Q43699;P41040;B6T376;B6T1V6;B6T148;B4FQS6;A0A1D6F4L6;A0A3L6DR95;A0A1D6MQ76;A0A1D6M749;A0A317YD59;A0A3L6DH77;A0A1D6PBR7;A0A3L6EBL3;A0A3L6DM99;A0A1D6FBD8;K7VGX4;Q43698;O22641;D0F042	82;82;46;31;46;46;130;102;82;82;82;82;82;82;82;31;46;46;82;82;80;80;80;62;60;46;82;82;48	B4FBY6	3.55e-19	121.68	1;2	S	PEFLNLMARKMKDTDSEEELKEAFRVFDKDQ	X;X;X;X;X;X;X;X;X;X;Oxidation (M);X;X;Phospho (STY);X;Phospho (STY);X;X;X;X;X;X;X;X;X;X;X;X;X;X;X	XXXXXXXXXPPPPPPPPPPPPPPPPXXXXXX	MKDT(1)DS(1)EEELKEAFR	6	4	1.6498			1581;1582;4928;4929;4930;4931;6170;6171;6172;6173;6174;6175;6176;6177;6178;6182;6183	6183	4.45053	4.32069	4.47081	5.95659	5.20897	5.93831	0.00681299	-1.28728	0.409723
B4FQ73		B4FQ73;B6TB81;B4FZ47;A0A3L6F7Z1;A0A1D6PN12;C4J343	229;231;231;247;250;133	B4FQ73	2.94e-17	94.025	1	S	NDRRGADNGRDERKRSPAGEEDEEPRRGHHR	X;X;X;X;X;X;X;X;X;X;X;X;X;X;X;Phospho (STY);X;X;X;X;X;X;X;X;X;X;X;X;X;X;X	XXXXXXXXXXXXXPPPPPPPPPPPPPXXXXX	KRS(1)PAGEEDEEPR	3	3	0.31518			5081;5082	5082	-0.575815	-0.635335	-0.458223	0.296793	0.220744	0.40354	0.000313068	-0.863484	0.549624
B4FUV7	100273352	B4FUV7	31	B4FUV7	7.22e-95	181.65	1	S	YGAGAGAGAMNLRSYSASYERPTTAAPSTVQ	X;X;X;X;X;X;X;X;X;X;X;X;X;X;X;Phospho (STY);X;X;X;X;X;X;X;X;X;X;X;X;X;X;X	XXXXXXXXXXXXXPPPPPPPPPPPPPPPPPP	SYS(0.985)AS(0.015)YERPTTAAPSTVQR	3	3	-0.86029			8785;8786	8786	0.199355	0.0500303	0.114866	0.764034	0.74049	0.893583	0.000457638	-0.677952	0.625052
B4G0W3	100274421	B4G0W3;A0A3L6DQQ3	69;69	B4G0W3	1.41e-06	66.019	1	S	RLCTGPKLKKLGPSTSFKFQQIALQRDEFSR	X;X;X;X;X;X;X;X;X;X;X;X;X;X;X;Phospho (STY);X;X;X;X;X;X;X;X;X;X;X;X;X;X;X	XXXXXXXXXXPPPPPPPPPPPPPPPPXXXXX	LGPST(0.134)S(0.866)FK	6	2	0.37406			5445;5446	5445	1.18697	1.06649	1.02026	1.56588	2.01834	1.62131	0.012978	-0.643937	0.639964
B4G1V7	100278648	B4G1V7;B6UBR7	99;99	B4G1V7	9.84e-13	69.175	1	S	QEQPAAAAGDDAAPKSPAPEAPKEPAAVPAP	X;X;X;X;X;X;X;X;X;X;X;X;X;X;X;Phospho (STY);X;X;X;X;X;X;X;X;X;X;X;X;X;X;X	PPPPPPPPPPPPPPPPPPPPPPPXXXXXXXX	EFSAGHATEQEQPAAAAGDDAAPKS(1)PAPEAPK	25	4	0.74536			1744;1745	1745	-2.72092	-2.68175	-2.86894	-0.945387	-1.8225	-0.848292	0.00789527	-1.55181	0.341081
B6SL17	ZEAMMB73_Zm00001d054014	B6SL17;K7UCE9;A0A1D6PSV9;A0A317YD27;A0A3L6F9P8	39;39;14;20;70	B6SL17	0.00120963	41.523	1	S	TTMTSKTSGSITTSLSTTGKLSSVGSSFMAS	X;X;X;X;X;X;X;X;X;X;X;X;X;X;X;Phospho (STY);X;X;X;X;X;X;X;X;X;X;X;X;X;X;X	XXXXXXPPPPPPPPPPPPPPXXXXXXXXXXX	TSGSIT(0.001)T(0.015)S(0.054)LS(0.755)T(0.136)T(0.038)GK	10	2	0.58572			9305	9305	-1.08168	-0.856913	-0.933821	-0.292305	-0.167845	-0.392207	0.0018945	-0.673352	0.627048
C0HHW0	ZEA	C0HHW0;B6SXI4;A0A1D6ELD9;A0A1D6ELE1;A0A1D6ELD6;A0A1D6ELE0;A0A3L6FZ96	12;12;12;12;12;12;12	C0HHW0	1.13e-08	70.765	1	S	____MEGSSYASRSYSELAAAASGGGRTLRV	X;X;X;X;X;X;X;X;X;X;X;X;X;X;X;Phospho (STY);X;X;X;X;X;X;X;X;X;X;X;X;X;X;X	XXXXXXXXXXXXXPPPPPPPPPPPPPPXXXX	S(0.183)YS(0.816)ELAAAASGGGR	3	2	-0.67122			8788	8788	0.115724	0.10477	0.147946	0.705032	1.12182	1.0141	0.00278841	-0.82417	0.564807
B6T8I6		B6T8I6	103	B6T8I6	4.05e-36	139.89	1	S	SPVVQTPKSTAFVEASPVVQTQKTATDAEVP	X;X;X;X;X;X;X;X;X;X;X;X;X;X;X;Phospho (STY);X;X;X;X;X;X;X;X;X;X;X;X;X;X;X	XXXXXXXXPPPPPPPPPPPPPPPXXXXXXXX	STAFVEAS(1)PVVQTQK	8	2	-1.1373			8537;8538	8538	-0.519546	-0.613583	-0.437445	0.815936	0.808062	0.820185	1.25431e-05	-1.33825	0.395499
B6TPK0	100284050	B6TPK0	466	B6TPK0	3.97e-06	59.777	1	S	NYRDGVSRVDFDEFGSMDATKTEKGFSIQFS	X;Phospho (STY);X;X;X;X;X;X;X;X;X;X;X;X;X;Phospho (STY);Oxidation (M);X;X;X;X;X;X;X;X;X;X;X;X;X;X	XXXXXXXXPPPPPPPPPPPPPXXXXXXXXXX	VDFDEFGS(1)MDATK	8	3	-0.62996			9488;9489	9489	0.693514	0.810949	0.747533	1.38663	1.47152	1.54417	0.000226702	-0.716774	0.608456
B6TRM8		B6TRM8	467	B6TRM8	0.000376831	32.165	1	S	RTSKAPDEPLKAPENSPKAAEAEA_______	X;X;X;X;X;X;X;X;X;X;X;X;X;X;X;Phospho (STY);X;X;X;X;X;X;X;X;X;X;X;X;X;X;X	XXXXPPPPPPPPPPPPPPXXXXXXXXXXXXX	APDEPLKAPENS(1)PK	12	4	0.24801			663;664	664	-1.07406	-0.877715	-1.0818	0.774548	0.394728	0.798112	0.000342745	-1.66699	0.31491
B6U3A0	100285313	B6U3A0;A0A1D6HUP2;A0A3L6E2W6	207;140;208	B6U3A0	6.51e-08	94.067	1	S	YGSGRDRYAPAAERYSGDRYSGADRYASSGF	X;X;X;X;X;X;X;X;X;X;X;X;X;X;X;Phospho (STY);X;X;X;X;X;X;X;X;X;X;X;X;X;X;X	XXXXXXXPPPPPPPPPPPPPPPPPPXXXXXX	YAPAAERYS(1)GDR	9	2	-0.66003			10217;10218;10219;10220;10221	10218	2.00943	2.00375	2.09639	2.98905	2.79911	2.94509	0.000174027	-0.87456	0.54542
C0HE93	100304271	C0HE93;A0A3L6EM42	193;193	C0HE93	2.65e-10	88.435	1	S	PPNPSPTQPPPRLAASPSPSYSRLGGAAGFP	X;X;X;X;X;X;X;X;X;X;X;X;X;X;X;Phospho (STY);X;X;X;X;X;X;X;X;X;X;X;X;X;X;X	XXXXXXXXXXXXPPPPPPPPPPPXXXXXXXX	LAAS(0.766)PS(0.23)PS(0.004)YSR	4	2	-0.16652			5228	5228	0.0616752	-0.371811	-0.297771	0.549921	0.899395	0.412303	0.014014	-0.823175	0.565197
C4JBC7		C4JBC7	84	C4JBC7	1.13e-18	105.82	1	S	ADSDKAKPADADKVFSDSELWIWSTTRTKAE	X;X;X;X;X;X;X;X;X;X;X;X;X;X;X;Phospho (STY);X;X;X;X;X;X;X;X;X;X;X;X;X;X;X	XXXXXPPPPPPPPPPPPPPPPPPPPPPXXXX	AKPADADKVFS(0.946)DS(0.053)ELWIWSTTR	11	4	1.8206			477;478	477	1.27139	1.17817	1.26709	1.82821	2.07711	1.73953	0.00367304	-0.642732	0.640499
K7PRK8	Tie-dyed2	K7PRK8;A0A1D6HQB7	810;247	K7PRK8	0.0151167	38.672	1	S	IPSDTSKRRGFRAAFSKPSKTSEDTREQEKI	X;X;X;X;X;X;X;X;X;X;X;X;X;X;X;Phospho (STY);X;X;X;X;X;X;X;X;X;X;X;X;X;X;X	XXXXXXXXXXXXPPPPPPPPXXXXXXXXXXX	AAFS(0.998)KPS(0.002)K	4	3	0.58407			74	74	-1.15106	-1.63612	-1.39819	0.720154	1.14064	0.82824	0.000262364	-2.29147	0.204267
A0A1D6E0C7	103645972	A0A1D6E0C7;A0A1D6E0B4;A0A1D6E0B5;A0A1D6E0B6;A0A096SBT9;A0A1D6H263;A0A1D6KJK0;A0A3L6G6Y9;A0A1D6KJJ2;A0A1D6JDM1;K7TW41;A0A1D6H249;A0A1D6JDM3;A0A1D6KJK1;A0A1D6KJJ7;A0A1D6H235;A0A1D6KJJ0;A0A1D6H248;A0A1D6H246;A0A1D6KJI9;A0A1D6H260;A0A1D6H236;A0A1D6KJJ5;A0A1D6H256;A0A1D6H240;A0A1D6H252;A0A1D6H261;A0A317Y302;A0A3L6FZA0	60;60;60;60;60;73;69;64;69;64;64;73;64;69;69;73;69;73;73;69;73;73;69;73;73;73;73;69;64	A0A1D6E0C7	6.39e-05	67.11	1	T	RQAALVLNASRRFRYTLDLKKEEQNEEIRRK	X;X;X;X;X;X;X;X;X;Phospho (STY);X;X;X;X;X;Phospho (STY);X;X;X;X;X;X;X;X;X;X;X;X;X;X;X	XXXXXXXXXXXXPPPPPPPPXXXXXXXXXXX	FRYT(1)LDLK	4	3	-0.66755			2310	2310	-1.87004	-1.92808	-1.9668	0.0252552	-0.645757	0.0692793	0.0017281	-1.7379	0.299807
A0A3L6FNN8	Os04g0656100_3	A0A3L6FNN8;B8A326;A0A1D6DVJ8;Q8L6A2;A0A317YGT4	587;881;566;242;212	A0A3L6FNN8	2.12e-144	202.68	1	T	YGREEREAQWATAQRTLHGLQPPEASSNTLF	X;X;X;X;X;X;X;X;X;X;X;X;X;X;X;Phospho (STY);X;X;X;X;X;X;X;X;X;X;X;X;X;X;X	XXXXXXPPPPPPPPPPPPPPPPPPPPPPPPP	T(1)LHGLQPPEASSNTLFNDK	1	3	-0.52102			1663;1664;9163;9164;9165;9166;9167	9163	3.35004	3.42503	3.44529	3.88891	4.19648	3.94228	0.00371574	-0.602432	0.658643
A0A3L6FWH7	FER_3	A0A3L6FWH7;A0A1D6DXI0	488;489	A0A3L6FWH7	0.000264229	41.152	1	T	KAANKESRKPDDGHWTPLTDYSKSRSNTSAK	X;X;X;X;X;X;X;X;X;X;X;X;X;X;X;Phospho (STY);X;X;X;X;X;X;X;X;X;X;X;X;X;X;X	XXXXXXXXPPPPPPPPPPPPPPPXXXXXXXX	KPDDGHWT(0.976)PLT(0.023)DY(0.001)SK	8	4	0.80826			4964	4964	-1.84852	-1.69254	-1.95596	-1.17838	-1.14601	-0.906595	0.00276819	-0.755346	0.592404
A0A1D6E0R1	100501876	A0A1D6E0R1;A0A3L6FW16;C4J6N6	133;174;195	A0A1D6E0R1	0.00145907	62.31	1	T	GSNYSSGERYGSFSGTKEADSYGDSYRDKES	X;X;X;X;X;X;X;X;X;X;X;X;X;X;X;Phospho (STY);X;X;X;X;X;X;X;X;X;X;X;X;X;X;X	XXXXXXXXXPPPPPPPPXXXXXXXXXXXXXX	YGS(0.01)FS(0.079)GT(0.911)K	7	2	-0.30898			10311;10312	10311	1.82612	1.71485	1.62823	2.64674	2.81272	2.6219	0.000303831	-0.970717	0.510253
A0A1D6E3P9	ZEAMMB73_Zm00001d002715	A0A1D6E3P9;A0A1D6E3Q2;A0A1D6E3P8;A0A1D6E3Q1;A0A1D6E3P6;A0A1D6E3P5;A0A1D6E3P3;A0A3L6FZU6;A0A1D6E3P1;A0A1D6E3R6;A0A1D6E3R9;A0A1D6E3Q4;A0A1D6E3R3;A0A1D6E3Q9;A0A1D6E3Q6	979;779;1235;786;1446;1484;1522;1719;1712;67;67;412;440;575;656	A0A1D6E3P9	3.31e-09	89.508	1	T	AAKLQTFSSFQMPMETASNKPGSTLKDKAAA	X;X;X;X;X;X;X;X;X;X;X;Oxidation (M);X;Oxidation (M);X;Phospho (STY);X;X;X;X;X;X;X;X;X;X;X;X;X;X;X	XXXPPPPPPPPPPPPPPPPPPPPPPPXXXXX	LQTFS(0.005)S(0.029)FQMPMET(0.945)AS(0.02)NKPGSTLK	13	3	-2.1518			5821	5821	-0.406636	-0.67606	-0.294355	0.708814	0.541305	0.82333	0.00118874	-1.15017	0.450573
Q6LBU9	GAPA	Q6LBU9;P09315;A0A3L6FV10;A0A1D6E965	98;118;118;118	Q6LBU9	6.67e-73	155.51	1	T	TGGVKQASHLLKYDSTLGIFDADVKPVGDNA	Phospho (STY);X;X;X;X;X;X;X;X;X;X;X;X;X;X;Phospho (STY);X;X;X;X;X;X;X;X;X;X;X;X;X;X;X	XXXXXXXXXXXXPPPPPPPPPPPPPPPPPPP	YDS(0.231)T(0.769)LGIFDADVKPVGDNAISVDGK	4	3	0.17065			10273;10274;10275	10275	1.83367	1.91824	1.84205	2.63694	2.54271	2.74426	0.000266815	-0.776648	0.583721
A0A3L6EVK3	CPK24_1	A0A3L6EVK3;A0A1D6QLJ2;A0A3L6G3K8;A0A1D6EHL3;K7V3X5;Q7Y037	242;242;422;422;490;492	A0A3L6EVK3	0.00224804	25.075	2	T	TAMMRKGNAGATGRRTMRNSLHLNLGELLNP	X;X;X;X;X;X;X;X;X;X;X;X;X;X;X;Phospho (STY);Oxidation (M);X;X;Phospho (STY);X;X;X;X;X;X;X;X;X;X;X	XXXXXXXXXXXXXXXPPPPPPPPPPPPPPPP	T(1)MRNS(1)LHLNLGELLNPSKT	1	4	-0.43606			9204	9204	-2.855	-2.73115	-2.43137	-2.02807	-1.94327	-2.16386	0.0113064	-0.627444	0.647322
A0A1D6EXJ7	100383299	A0A1D6EXJ7;A0A1D6EXG7;A0A1D6EXJ9;A0A1D6EXJ1;A0A1D6EXH2;A0A3L6FV92	430;754;764;807;808;1108	A0A1D6EXJ7	0.00138037	56.367	1	T	ALAANFESSSNRNLSTPPPVVKKLYPKSVTP	X;X;X;X;X;X;X;X;X;X;X;X;X;X;X;Phospho (STY);X;X;X;X;X;X;X;X;X;X;X;X;X;Phospho (STY);X	XXXXXXXXXXXXPPPPPPPPPPXXXXXXXXX	NLS(0.188)T(0.812)PPPVVK	4	3	-0.073872			6436;6438	6438	-0.764121	-0.880952	-1.16594	-0.179607	0.0202262	-0.319067	0.00735558	-0.777521	0.583369
A0A1D6FGM4	ZEAMMB73_Zm00001d008906	A0A1D6FGM4;A0A1D6FGM3;A0A1D6FGM0;A0A1D6FGL7;A0A1D6FGM2;A0A1D6FGL9;A0A3L6DN79	91;231;216;231;231;216;217	A0A1D6FGM4	0.001763	49.334	1	T	QAMPRHRGTEFQRSLTAGQLVNRQFASPSND	X;X;X;X;X;X;X;X;X;X;X;X;X;X;X;Phospho (STY);X;X;X;X;X;X;X;X;X;X;X;X;X;X;X	XXXXXXXXXXXXXPPPPPPPPPPXXXXXXXX	S(0.022)LT(0.978)AGQLVNR	3	2	0.42344			8074	8074	-0.593502	-0.45332	-0.649278	-0.0412145	0.166297	-0.0213809	0.00243445	-0.599934	0.659784
A0A1D6GRU8	ZEAMMB73_Zm00001d014294	A0A1D6GRU8;A0A1D6GRS8;A0A1D6GRR6;A0A1D6GRR9;A0A1D6GRR8;A0A3L6EVY3;A0A1D6GRS6;A0A1D6GRT0;A0A1D6GRS9;A0A1D6GRU0;A0A1D6GRS4;A0A1D6GRU7;A0A1D6GRS7;A0A1D6GRT8;A0A1D6GRU2;A0A1D6GRT9;A0A1D6GRT5;A0A1D6GRT6;A0A1D6GRS0	571;533;1031;1011;1006;995;769;576;571;488;49;410;322;322;245;201;145;69;1036	A0A1D6GRU8	8.27e-08	77.885	1	T	LSELEMFTEEGERLSTPRRKMAINERMEDLV	X;X;X;X;X;Oxidation (M);X;X;X;X;X;X;X;X;X;Phospho (STY);X;X;X;X;X;X;X;X;X;X;X;X;X;X;X	PPPPPPPPPPPPPPPPPPXXXXXXXXXXXXX	SLSELEMFTEEGERLS(0.198)T(0.802)PR	17	3	-0.45554			8034;8035	8035	1.01234	0.789869	0.816063	1.90424	3.80755	2.17995	0.0424057	-1.75782	0.295694
B8A2T3	100280259	B8A2T3;B6SRI6;A0A3L6EGF0;A0A1D6HPR8;A0A1D6KN30	63;63;63;63;189	B8A2T3	2.01e-06	74.378	1	T	DMSAESIRRTQYPSFTDRPSNLRVFSFAELK	X;Oxidation (M);Phospho (STY);X;X;X;X;X;X;X;X;X;X;X;X;Phospho (STY);X;X;X;X;X;X;X;X;X;X;X;X;X;X;X	XXXXXXXXXPPPPPPPPPPPPPPXXXXXXXX	TQYPS(0.088)FT(0.912)DRPSNLR	7	3	-0.8204			9281	9281	-1.20449	-1.20316	-1.06886	-0.45787	-0.49612	-0.282532	0.000722132	-0.746665	0.59598
A0A1D6I1V6	ZEAMMB73_Zm00001d020057	A0A1D6I1V6;P51059;A0A3L6DYP7;A0A1D6I1V3;A0A1D6I1V4;A0A3L6DCW6;Q84KR7;Q43267;P04711;B8XPZ2;E9NQE1;K7VCJ9;A0A1D6GB94;A0A1D6GB93;A0A1D6I1V5;A0A3L6DPS1;A0A1D6GBA2	262;262;262;262;262;265;265;265;265;265;265;260;247;260;25;260;186	A0A3L6DCW6	4.33e-05	32.654	1	T	ETIWKGVPKFLRRVDTALKNIGINERVPYNA;ETVWKGVPKFLRRVDTALKNIGINERLPYNV	X;X;X;X;X;X;X;X;X;X;X;X;X;X;X;Phospho (STY);X;X;X;X;X;X;X;X;X;X;X;X;X;X;X	XXXXXXXXXXXXPPPPPPPXXXXXXXXXXXX	RVDT(1)ALK	4	3	-0.066398			7327	7327	-0.349252	-0.438112	-0.61328	0.105391	0.349046	0.364889	0.00293517	-0.73999	0.598744
A0A1D6IP64	100275036	A0A1D6IP64;A0A1D6IP65;A0A3L6DXS0;A0A1D6IP63	109;110;110;110	A0A1D6IP64	9.35e-05	63.263	1	T	SPGSTKRVGPIVRPTTPKSSVPTISAFDRIE	X;X;X;X;X;X;X;X;X;X;X;X;X;X;X;Phospho (STY);X;X;X;X;X;X;X;X;X;X;X;X;X;X;X	XXXXXXXPPPPPPPPPPPXXXXXXXXXXXXX	VGPIVRPT(0.026)T(0.974)PK	9	3	-0.33375			9650;9651	9651	0.435008	0.532059	0.519748	1.42248	1.44966	1.40067	1.02375e-05	-0.928663	0.525345
A0A1D6J6X1	103641640	A0A1D6J6X1;A0A3L6G6L2;A0A1D6J6W9;K7U3F5;A0A1D6J6X2;A0A3L6G261;A0A1D6EB28;A0A1D6EB27;A0A1D6EB26;A0A1D6EB29	176;176;176;176;176;175;175;175;175;175	A0A1D6J6X1	7.42e-15	96.48	1	T	AAAAAAARKALTSVQTLPKGVEVLDPLGLGV	X;X;X;X;X;X;X;X;X;X;X;X;X;X;X;Phospho (STY);X;X;X;X;X;X;X;X;X;X;X;X;X;X;X	XXXXXXXXPPPPPPPPPPPXXXXXXXXXXXX	ALTSVQT(1)LPK	7	2	-0.16285			595;596;597;598;4501;4502	597	1.49119	1.37009	1.27117	1.82321	2.13806	1.98947	0.00546631	-0.606092	0.656974
B6UCD1	100278698	B6UCD1;A0A317YFI0;A0A1D6KMK4;A0A1D6KMK3;A0A1D6KML5;A0A317YM60	68;68;68;88;96;137	B6UCD1	0.00121285	36.289	1	T	GKRTLFSDFSPDKYVTWNPRRSEYPLSEEVD	X;X;X;X;X;X;X;X;X;X;X;X;X;X;X;Phospho (STY);X;X;X;X;X;X;X;X;X;X;X;X;X;X;X	XXXPPPPPPPPPPPPPPPPPXXXXXXXXXXX	YVT(1)WNPR	3	2	-0.65774			9150;10429	10429	0.459959	0.45205	0.462199	1.05794	1.05169	1.07262	1.04432e-07	-0.602679	0.65853
A0A1D6KR80	100276276	A0A1D6KR80;B6T7W2;A0A317YJW4	12;13;13	A0A1D6KR80	0.00138623	34.223	1	T	____MAQQKVVVRVPTMTDDKIKQKAIEAVA	X;X;X;X;X;X;X;X;X;X;X;X;X;X;X;Phospho (STY);Oxidation (M);X;X;X;X;X;X;X;X;X;X;X;X;X;X	XXXXXXXXXXXXXPPPPPPPPPPXXXXXXXX	VPT(0.988)MT(0.012)DDKIK	3	3	0.84019			9861	9861	-1.28471	-1.41483	-1.2423	-0.25721	-0.547983	-0.369826	0.000747435	-0.922273	0.527677
A0A1D6LDS8	542108	A0A1D6LDS8;A0A3L6EDF1;A0A1Q1AN58;B6TP93;B6THF2;B6TB39;B6TB29;B6T8L6;Q6XZ78;B7ZYU3;A0A1D6LDS7;A0A1D6LDR7;A0A1D6LDR6;A0A1D6LDS4;A0A1D6LDS6;A0A1D6LDS3;A0A1D6LDS1	164;326;326;326;326;326;326;326;326;199;304;276;247;242;211;208;329	A0A1D6LDS8	2.52e-18	106.49	1	T	CTTKKGAIPALPTVATAQDLIAKAN______	X;X;X;X;X;X;X;X;X;X;X;X;X;X;X;Phospho (STY);X;X;X;X;X;X;X;X;X;X;X;X;X;X;X	XXXXPPPPPPPPPPPPPPPPPPPXXXXXXXX	GAIPALPTVAT(1)AQDLIAK	11	3	-2.3654			2406;2407;4739	2406	-0.253492	0.0343222	-0.22435	0.757438	0.616317	0.808087	0.00125988	-0.875121	0.545208
A0A1D6LW62	ZEAMMB73_Zm00001d037279	A0A1D6LW62;A0A1D6LW66;A0A1D6LW55;A0A1D6LW60;C0P4D8;A0A1D6LW54;C0HFG9;A0A1D6LW67	433;545;651;687;806;829;846;295	A0A1D6LW62	1.09e-26	86.318	1	T	VSSYSNDTTEAESPRTPTRSGEDWRSAFDSA	X;X;X;X;X;X;X;X;X;X;X;X;Phospho (STY);X;X;Phospho (STY);X;X;X;X;X;X;X;X;X;X;X;X;X;X;X	PPPPPPPPPPPPPPPPPPPXXXXXXXXXXXX	ASVSSYSNDTTEAES(0.002)PRT(0.951)PT(0.047)R	18	3	-0.16693			1003;1004	1003	-0.843518	-0.676601	-0.768071	0.324698	0.530966	0.601928	0.000202788	-1.24859	0.420858
A0A1D6MEW4	ZEAMMB73_Zm00001d039270	A0A1D6MEW4	61	A0A1D6MEW4	5.39e-15	99.876	1;2	T	ADDDDDDEEEEEEEETTDDDEKQPAAKTVVP	X;X;X;X;X;X;X;X;X;X;X;X;X;X;X;Phospho (STY);Phospho (STY);X;X;X;X;X;X;X;X;X;X;X;X;X;X	PPPPPPPPPPPPPPPPPPPPPPPPPPPXXXX	AADDDDDDEEEEEEEET(1)T(1)DDDEKQPAAK	17	3	0.97439			45;46;47;48	48	-1.36073	-1.1455	-1.7201	0	0.0232359	0.00111391	0.00107685	-1.4169	0.374517
A0A1D6MEW4	ZEAMMB73_Zm00001d039270	A0A1D6MEW4	62	A0A1D6MEW4	5.39e-15	99.876	1;2	T	DDDDDDEEEEEEEETTDDDEKQPAAKTVVPL	X;X;X;X;X;X;X;X;X;X;X;X;X;X;Phospho (STY);Phospho (STY);X;X;X;X;X;X;X;X;X;X;X;X;X;X;X	PPPPPPPPPPPPPPPPPPPPPPPPPPXXXXX	AADDDDDDEEEEEEEET(1)T(1)DDDEKQPAAK	18	3	0.97439			45;46;47;48	48	-1.36073	-1.1455	-1.7201	0	0.0232359	0.00111391	0.00107685	-1.4169	0.374517
A0A1D6MM59	100382048	A0A1D6MM59	96	A0A1D6MM59	1.03e-173	228.31	2	T	ASRAADLDDARIAVATGAAYSDDDDSDEAAA	X;X;X;X;X;X;X;X;X;X;X;X;X;X;X;Phospho (STY);X;X;X;X;X;X;X;X;X;Phospho (STY);X;X;X;X;X	XXXXXXXXXXXPPPPPPPPPPPPPPPPPPPP	IAVAT(0.997)GAAYS(0.003)DDDDS(1)DEAAAPR	5	2	0.35431			4097;4098;4099	4098	0.485952	0.435557	0.261948	1.08595	1.30609	1.21509	0.000973744	-0.807891	0.571216
A0A1D6P1E3	ZEAMMB73_Zm00001d046221	A0A1D6P1E3;A0A3L6D8Q1;A0A1D6P1E1;A0A1D6P1C9;A0A1D6P1E2;A0A1D6P1F7;A0A1D6P1G2;A0A1D6P1F1;A0A1D6P1D4;A0A1D6P1H5;A0A1D6P1G3;A0A1D6P1G8;A0A1D6P1F3	433;439;433;418;433;411;411;418;418;296;411;411;411	A0A1D6P1E3	0.00380801	32.632	1	T	RERDRKHRTDPRREHTPPRGPGDRRRSSSVR	X;X;X;X;X;X;X;X;X;X;X;X;X;X;X;Phospho (STY);X;X;X;X;X;X;X;X;X;X;X;X;X;X;X	XXXXXXXXXXXXPPPPPPPPPPPPXXXXXXX	REHT(1)PPRGPGDR	4	4	-0.28045			6957	6957	-3.0124	-2.65898	-3.49248	-2.26509	-2.34191	-2.18459	0.0323576	-0.790755	0.578041
A0A3L6EYZ1	NIA1_0	A0A3L6EYZ1;A0A1D6PZA5;Q9XGW5;Q43265;P17571	529;529;529;120;240	A0A3L6EYZ1	5.48e-14	85.706	1	T	ETAEAAAPGLKRSTSTPFMNTTDVGKQFTMS	X;X;X;X;X;X;X;X;X;X;X;X;X;X;X;Phospho (STY);X;X;Oxidation (M);X;X;X;X;X;X;X;X;X;X;X;X	XXXXXXXXXXXXPPPPPPPPPPPPPPXXXXX	S(0.003)T(0.003)S(0.228)T(0.767)PFMNTTDVGK	4	2	-0.65512			8630;8632	8630	1.25469	1.21239	0.985148	2.53805	2.79386	2.62394	0.000182282	-1.5012	0.353258
A0A1D6QA26	100278485	A0A1D6QA26;A0A1D6QA23;A0A1D6QA14;A0A1D6QA20;A0A1D6QA15;A0A1D6QA27;A0A1D6QA16;A0A1D6QA11;A0A1D6QA12;A0A1D6QA29	62;285;366;748;800;1048;1079;1103;1109;1079	A0A1D6QA26	0.00178252	22.831	2	T	PSARAPFGHSPVDPRTPSYSKHTDGRFGGRD	X;X;X;X;X;X;X;X;X;Phospho (STY);X;X;X;X;X;Phospho (STY);X;X;X;X;X;X;X;X;X;X;X;X;X;X;X	XXXXPPPPPPPPPPPPPPPPPXXXXXXXXXX	APFGHS(0.999)PVDPRT(0.788)PS(0.129)Y(0.058)S(0.027)K	12	4	-0.78999			675	675	-2.14049	-2.39279	-2.97686	-1.64918	-1.37735	-1.70235	0.0256406	-0.927084	0.52592
P31927	SPS	P31927;A0A1Q1CBT2;A0A3L6DIF3;A0A1D6G664;A0A3L6EYB8;A0A3L6D820;A0A3L6GDM8;A0A1D6ISJ0;A0A1D6ISD8;A0A3L6FED5	165;165;165;119;140;446;252;256;309;166	P31927	6.69e-12	99.606	1	T	VEAAKKKFQRNFSDLTVWSDDNKEKKLYIVL;VETTKKKFQRNFSDLTVWSDDNKEKKLYIVL	X;X;X;X;X;X;X;X;X;X;X;X;X;X;X;Phospho (STY);X;X;X;X;X;X;X;X;X;X;X;X;X;X;X	XXXXXXXXXXPPPPPPPPPPPPPXXXXXXXX	NFS(0.219)DLT(0.781)VWSDDNK	6	3	0.3225			6351	6351	-0.695182	-0.761588	-0.720782	0.193282	-0.048899	0.198001	0.000556553	-0.839979	0.558652
C0P3W9	541622	C0P3W9;A0A317Y6G1;A0A1D6JWH4;A0A1D6JWH5;A0A1D6JWH6;Q9SLZ0	12;12;12;12;12;12	C0P3W9	0.000181603	36.882	1	T	____MATPNGLARIETTGKKKQDNGVWYDDS	X;X;X;X;X;X;X;X;X;X;X;X;X;X;X;Phospho (STY);X;X;X;X;X;X;X;X;X;X;X;X;X;X;X	XXXXXXXXXXXXXPPPPPPPXXXXXXXXXXX	IET(0.93)T(0.07)GKK	3	2	0.3233			4144;4145	4145	2.22877	2.08232	2.02207	3.14646	3.44312	3.21447	0.000441368	-1.15696	0.448456
C4JC17	100502498	C4JC17;A0A3L6DV30	478;478	C4JC17	0.000337825	52.858	1	T	VKEKKKKRQKDDAEDTDASVPAKKIKVEEAT	X;X;X;X;X;X;X;X;X;X;X;X;X;X;X;Phospho (STY);X;X;X;X;X;X;X;X;X;X;X;X;X;X;X	XXXXXXXXPPPPPPPPPPPPPPPPXXXXXXX	QKDDAEDT(0.999)DAS(0.001)VPAKK	8	4	-0.49288			6715	6715	-1.25563	-2.01786	-1.45799	-0.748154	-0.391227	-0.706841	0.0194053	-0.961751	0.513434
A0A3L6EDS2	PPDK1_1	A0A3L6EDS2;B7ZYP6;E9NQE5;B8YDC0;A0A1D6M411;A0A1D6M434;A0A1D6M426;C5IHC6;C5IHC7;C5IHF1;A0A1D6M418;A0A1D6M414;A0A1D6M431;A0A1D6M422;A0A1D6M439;A0A1D6M433;C5IHD1;A0A1D6M417;C5IHC9;A0A1D6M413;C5IHD3;A0A1D6M432;A0A1D6M436;C5IHD5;A0A1D6M427;A0A1D6M430;A0A1D6M424;C5IHC4;C5IHE1;P11155;D3K3U9;A0A1D6M420;C5IHD6;C5IHD9;C5IHD4;A0A1D6M429;C5IHE4;A0A1D6M415;C5IHC5;C5IHE5;C5IHE8;A0A1D6M444;A0A1D6M425;C5IHF0;C5I…	551;551;551;498;514;434;411;461;461;461;448;462;443;376;342;308;461;325;461;348;461;369;390;461;432;462;314;461;461;527;551;294;461;461;461;462;461;394;461;461;461;212;220;461;461;461;274;135;461;461;15;463;463;508;463;508;391;443;370;442;314;440;308;349;353;294;435;395;407;432;434;221;212;29;15;114;463	A0A3L6EDS2	1.4e-42	133.61	1	T	GMHAAVGILTERGGMTSHAAVVARGWGKCCV	X;Oxidation (M);X;X;X;X;X;X;X;X;X;X;X;X;Oxidation (M);Phospho (STY);X;X;X;X;X;X;X;X;X;X;X;X;X;X;X	XXXXXXXXXXXXPPPPPPPPPPPPXXXXXXX	GGMT(0.99)S(0.01)HAAVVAR	4	2	0.37323			2607;2608;2609;2610;2611;2612;2613;2614;2615;2616;2617;2618;2619;2620;2621;2622;2623;2624;2625;2626;2627;2628;2629;2630;2631;2632;2633;2634;2635;2636;2637;2638;2639;2640;2641;2642;2643;2644;2645;2646;2650;2651;2652;2653;2654;2655;2656;2657;2658;2659;2660;2661;2662;2663;2664;2665;2681;2682;2683;2684;2685;2686;2687;2688;2689;2690;2691;2692;2693;2694;2695;2696;2697;2698;2699;2700;2716;2717;2718;2719…	3271	7.16763	7.2577	7.1533	7.98519	8.22289	8.15143	0.000281786	-0.926959	0.525966
A0A3L6EDS2	PPDK1_1	A0A3L6EDS2;B7ZYP6;E9NQE5;B8YDC0;A0A1D6M411;A0A1D6M434;A0A1D6M426;C5IHC6;C5IHC7;C5IHF1;A0A1D6M418;A0A1D6M414;A0A1D6M431;A0A1D6M422;A0A1D6M439;A0A1D6M433;C5IHD1;A0A1D6M417;C5IHC9;A0A1D6M413;C5IHD3;A0A1D6M432;A0A1D6M436;C5IHD5;A0A1D6M427;A0A1D6M430;A0A1D6M424;C5IHC4;C5IHE1;P11155;D3K3U9;A0A1D6M420;C5IHD6;C5IHD9;C5IHD0;C5IHD4;A0A1D6M429;C5IHC5	271;271;271;218;234;154;131;181;181;181;168;182;163;96;62;28;181;45;181;68;181;89;110;181;152;182;34;181;181;247;271;14;181;181;181;181;182;181	A0A3L6EDS2	8.68e-09	65.648	1	T	EHMKESKGLKNDTDLTASDLKELVGQYKEVY	X;X;Oxidation (M);X;X;X;X;X;X;X;X;X;X;X;X;Phospho (STY);X;X;X;X;X;X;X;X;X;X;X;X;X;X;X	XXXXXXXPPPPPPPPPPPPPPXXXXXXXXXX	GLKNDT(0.003)DLT(0.88)AS(0.117)DLK	9	3	-0.41857			3450	3450	0.55401	0.665681	0.622999	1.29246	1.68272	1.29035	0.00386475	-0.807613	0.571326
C4J515	100501668	C4J515;B6TIZ8;A0A3L6EXC0	153;153;153	C4J515	0.000218313	48.685	1	T	AVAKAEETKVTRRTVTIKEDRPAQEGSGGAS	X;X;X;X;X;X;X;X;X;X;X;X;X;X;X;Phospho (STY);X;X;X;X;X;X;X;X;X;X;X;X;X;X;X	XXXXXXXXXXXXXPPPPPPPPPPPPPPPPPP	T(0.002)VT(0.998)IKEDRPAQEGSGGASLER	3	3	-0.28498			9412	9412	-1.23598	-0.725781	-0.952872	-0.391843	-0.368911	-0.247847	0.0146064	-0.635345	0.643787
B6TXE4	ZEAMMB73_Zm00001d051334	B6TXE4;K7UXU1;A0A3L6F264	136;222;222	B6TXE4	0.00115523	34.091	1	T	TIPMMRYAGYFQRPNTMTRRIKSVPLDAFAA	X;X;X;X;X;X;X;X;X;X;X;X;X;X;X;Phospho (STY);Oxidation (M);X;X;X;X;X;X;X;X;X;X;X;X;X;X	XXXXXXPPPPPPPPPPPPPXXXXXXXXXXXX	YAGYFQRPNT(0.888)MT(0.112)R	10	3	0.43035			10214	10214	-1.37678	-1.12065	-1.26023	0.0404255	0.141733	0.116042	7.20142e-05	-1.35195	0.391762
A0A3L6FD69	ATJ49_1	A0A3L6FD69;C0P4V7	240;241	A0A3L6FD69	1.69e-05	83.753	1	T	GGMAPATTRQFGQFGTFHFRTGGMHAHAHAQ	X;X;X;X;X;X;X;X;X;X;X;X;X;X;X;Phospho (STY);X;X;X;X;X;X;X;X;X;X;X;X;X;X;X	XXXXXXXXXPPPPPPPPPPPXXXXXXXXXXX	QFGQFGT(1)FHFR	7	3	-0.068797			6678	6678	-2.08161	-1.96116	-1.73545	-1.26125	-1.23352	-1.3654	0.00423344	-0.639352	0.642001
B4FKF8	ZEAMMB73_Zm00001d044120	B4FKF8;B4FU23;A0A3L6FH78	23;41;25	B4FKF8	0.0313643	15.812	1	T	ILSVLILAATKQMGRTVFAPPKRREPPVAEG	X;X;X;X;X;X;X;X;X;X;X;X;X;X;X;Phospho (STY);X;X;X;X;X;X;X;X;X;X;X;X;X;X;X	XXXXXXXXXXXXXXXPPPPPPPXXXXXXXXX	T(1)VFAPPK	1	2	0.92115			9373	9373	-2.89239	-3.70252	-1.25974	0.894158	2.3767	0.714583	0.0114153	-3.9467	0.0648523
B4FBF9	100192465	B4FBF9	46	B4FBF9	0.00673492	16.052	1	T	SRRETRPAPSPSPPATASPSRRPSHPQQAAT	X;X;X;X;X;X;X;X;X;X;X;X;X;X;X;Phospho (STY);X;X;X;X;X;X;X;X;X;X;X;X;X;X;X	XXPPPPPPPPPPPPPPPPPPPXXXXXXXXXX	RET(0.008)RPAPS(0.008)PS(0.032)PPAT(0.808)AS(0.142)PS(0.002)R	14	3	0.70964			6960	6960	-3.8183	-3.60148	-3.58504	-3.26756	-2.59483	-2.93242	0.0240654	-0.736671	0.600123
C0P913	100382728	C0P913;A0A1D6HH93;A0A1D6HHB5;A0A1D6HHC9;A0A1D6HH92;A0A1D6HHC6;A0A1D6HHA1;A0A1D6HHD3;A0A1D6HHA4;A0A1D6HHD7;A0A1D6HH95;A0A1D6HH90;A0A1D6HH94;A0A1D6HHC2;A0A1D6HHB6;A0A1D6HHA5;A0A1D6HHB9	290;290;290;287;253;290;290;290;290;82;290;290;290;46;290;159;290	C0P913	2.29e-06	82.521	1	Y	IDFGSVCMEGKTIYSYIQSRYYRSPEVLLGY	X;X;X;X;X;X;X;X;X;X;X;X;X;X;X;Phospho (STY);X;X;X;X;X;X;X;X;X;X;X;X;X;X;X	XXXXXXXXXXXPPPPPPPPPXXXXXXXXXXX	TIYS(0.002)Y(0.998)IQSR	5	2	1.9463			9119	9119	-0.478579	-0.511509	-0.746679	0.0940012	-0.0306392	0.108551	0.00261403	-0.636227	0.643394
